# Supplementary material for: Topology-aware pathway analysis of spatial transcriptomics
Source: PeerJ. 2025 Aug 14;13:e19729. doi: 10.7717/peerj.19729 (PMC12358110; doi:10.7717/peerj.19729)
Supplement: Supplemental Information 1 — The dataset contains four sheets: the first sheet lists significant marker genes identified for each cluster; the second sheet shows the results of overrepresentation analysis (ORA) performed on the marker genes; the third sheet includes cluster-specific significantly deregulated pathway branches identified using the PSF toolkit; and the fourth sheet presents cluster-specific pathways detected by the GSDensity method. [file peerj-13-19729-s001.xlsx]

## Sheet: Gene markers
Gene	p_val	avg_log2FC	pct.1	pct.2	p_val_adj	cluster
FOSB	7.19448e-223	2.21149	0.991	0.339	1.29868e-218	seurat_exp_0
CXCL14	2.36578e-195	2.14431	1	0.471	4.27047e-191	seurat_exp_0
COMP	7.07251e-187	2.23998	1	0.504	1.27666e-182	seurat_exp_0
TNXB	1.70594e-180	1.99043	0.891	0.348	3.07938e-176	seurat_exp_0
FOS	1.78905e-178	1.98287	1	0.725	3.22942e-174	seurat_exp_0
PLA2G2A	2.03026e-176	1.43768	0.483	0.055	3.66481e-172	seurat_exp_0
DCN	1.29825e-168	2.00994	1	0.632	2.34347e-164	seurat_exp_0
IGFBP4	8.42655e-162	1.80363	1	0.715	1.52108e-157	seurat_exp_0
CLU	5.31768e-160	2.26195	0.77	0.27	9.59895e-156	seurat_exp_0
COL3A1	5.71322e-158	1.65726	1	0.924	1.03129e-153	seurat_exp_0
SFRP2	3.204e-155	1.68355	0.972	0.394	5.78354e-151	seurat_exp_0
COL1A2	1.90415e-149	1.56502	1	0.844	3.43718e-145	seurat_exp_0
COL1A1	7.67789e-148	1.52367	1	0.893	1.38594e-143	seurat_exp_0
CXCL12	1.57123e-141	1.74626	1	0.7	2.83622e-137	seurat_exp_0
CFD	2.75001e-130	1.84611	1	0.755	4.96404e-126	seurat_exp_0
MMP2	7.84691e-118	1.55699	1	0.704	1.41645e-113	seurat_exp_0
JUN	2.19243e-117	1.55517	1	0.742	3.95755e-113	seurat_exp_0
COL6A2	6.83949e-116	1.2491	1	0.815	1.2346e-111	seurat_exp_0
JUND	1.66364e-114	1.20718	1	0.967	3.00303e-110	seurat_exp_0
FBLN1	1.13265e-104	1.39372	1	0.554	2.04455e-100	seurat_exp_0
ZFP36	1.52719e-103	1.36812	1	0.684	2.75673e-99	seurat_exp_0
MGP	1.47769e-101	1.13286	0.917	0.411	2.66738e-97	seurat_exp_0
CCDC80	2.27895e-99	1.39783	0.789	0.347	4.11373e-95	seurat_exp_0
KRT9	6.34184e-99	-2.5188	0.913	0.266	1.14477e-94	seurat_exp_0
TMSB4X	9.87222e-99	1.01993	1	0.995	1.78203e-94	seurat_exp_0
COL6A3	1.23341e-98	1.16967	1	0.744	2.22642e-94	seurat_exp_0
GSN	1.08247e-97	1.11541	1	0.946	1.95396e-93	seurat_exp_0
S100A6	3.39714e-95	1.09973	1	0.8	6.13217e-91	seurat_exp_0
FBN1	9.2054e-94	1.15395	1	0.546	1.66167e-89	seurat_exp_0
EGR1	3.61916e-92	1.47435	1	0.615	6.53295e-88	seurat_exp_0
ADIRF	1.7042e-91	1.16953	1	0.5	3.07625e-87	seurat_exp_0
SPRR2G	3.12768e-90	-2.17706	0.989	0.303	5.64578e-86	seurat_exp_0
FBLN2	5.26065e-89	1.15323	1	0.518	9.496e-85	seurat_exp_0
AQP1	5.37128e-88	1.32074	1	0.709	9.69569e-84	seurat_exp_0
PI3	2.25668e-82	-2.08852	0.97	0.324	4.07353e-78	seurat_exp_0
KRT1	3.27561e-81	-3.12111	1	0.407	5.9128e-77	seurat_exp_0
APOD	1.31389e-77	1.66189	1	0.733	2.37169e-73	seurat_exp_0
C1R	1.39278e-77	1.12904	1	0.631	2.5141e-73	seurat_exp_0
SBSN	1.56486e-76	-1.77906	0.983	0.312	2.82473e-72	seurat_exp_0
KRT10	4.06004e-74	-2.32345	1	0.741	7.32878e-70	seurat_exp_0
FLG	6.2778e-73	-3.17855	1	0.393	1.13321e-68	seurat_exp_0
CTSK	8.30239e-72	1.08596	1	0.554	1.49867e-67	seurat_exp_0
KCTD12	2.76895e-70	1.0945	1	0.812	4.99822e-66	seurat_exp_0
CALML5	1.77568e-69	-2.06119	1	0.342	3.20529e-65	seurat_exp_0
PI16	1.65971e-63	1.12646	0.404	0.134	2.99594e-59	seurat_exp_0
MLANA	2.84082e-62	-1.31647	1	1	5.12796e-58	seurat_exp_0
DSG1	2.37499e-59	-1.24756	0.96	0.344	4.2871e-55	seurat_exp_0
SPRR1B	5.63448e-57	-2.02673	1	0.372	1.01708e-52	seurat_exp_0
SOCS3	1.27748e-56	1.26957	1	0.699	2.30598e-52	seurat_exp_0
PLPP3	4.34484e-49	1.12948	1	0.775	7.84287e-45	seurat_exp_0
CSTA	1.19792e-45	-1.49369	1	0.41	2.16236e-41	seurat_exp_0
LOR	3.31857e-43	-2.30907	0.651	0.239	5.99035e-39	seurat_exp_0
CNFN	2.63228e-38	-1.07068	0.817	0.343	4.75153e-34	seurat_exp_0
KRT6B	3.70361e-32	-1.65343	1	0.458	6.68539e-28	seurat_exp_0
S100A8	7.71083e-32	-2.42115	1	0.519	1.39188e-27	seurat_exp_0
C3	1.26754e-31	1.16306	0.455	0.278	2.28803e-27	seurat_exp_0
KRTDAP	1.44424e-31	-2.64818	1	0.48	2.60699e-27	seurat_exp_0
DSC3	4.31787e-31	-1.02254	1	0.437	7.79418e-27	seurat_exp_0
COL17A1	6.69112e-31	-1.00495	0.998	0.438	1.20781e-26	seurat_exp_0
DSP	3.2838e-29	-1.55807	1	0.494	5.92758e-25	seurat_exp_0
KRT14	3.81079e-27	-1.49267	1	0.549	6.87885e-23	seurat_exp_0
KRT5	9.80864e-27	-1.51356	1	0.533	1.77056e-22	seurat_exp_0
PERP	2.30696e-23	-1.39567	1	0.467	4.16429e-19	seurat_exp_0
TRIM29	3.6843e-23	-1.25591	1	0.464	6.65053e-19	seurat_exp_0
SERPINB3	1.4201e-22	-1.44371	0.023	0.216	2.56343e-18	seurat_exp_0
S100A9	1.56573e-22	-2.23265	1	0.68	2.8263e-18	seurat_exp_0
TYRP1	3.9669e-22	-1.31861	0.03	0.224	7.16065e-18	seurat_exp_0
KLK5	2.93629e-21	-1.43848	0.026	0.209	5.3003e-17	seurat_exp_0
SFN	3.37639e-21	-1.333	1	0.471	6.09473e-17	seurat_exp_0
ASPRV1	6.737e-21	-1.32459	0.038	0.23	1.2161e-16	seurat_exp_0
KRT16	7.92833e-21	-2.04036	1	0.49	1.43114e-16	seurat_exp_0
S100A2	1.98019e-20	-1.46141	1	0.489	3.57445e-16	seurat_exp_0
LYPD3	6.89804e-20	-1.10838	0.083	0.28	1.24517e-15	seurat_exp_0
KRT6A	7.42099e-20	-1.79005	1	0.507	1.33956e-15	seurat_exp_0
IGLC1	1.57729e-19	-2.41787	1	0.613	2.84716e-15	seurat_exp_0
KRT17	3.3659e-19	-2.00061	1	0.535	6.07578e-15	seurat_exp_0
CRCT1	3.5373e-19	-1.07449	0.026	0.195	6.38518e-15	seurat_exp_0
SPINK5	1.5535e-18	-1.49676	0.045	0.218	2.80422e-14	seurat_exp_0
KLK13	1.85397e-18	-1.16946	0.032	0.203	3.34661e-14	seurat_exp_0
IGHG1	4.14871e-18	-2.06802	1	0.757	7.48884e-14	seurat_exp_0
IVL	8.39321e-18	-1.16991	0.026	0.183	1.51506e-13	seurat_exp_0
LCE3D	4.61149e-17	-1.22915	0.026	0.179	8.3242e-13	seurat_exp_0
KRT80	8.1792e-17	-1.05656	0.028	0.179	1.47643e-12	seurat_exp_0
RHCG	8.4536e-17	-1.22912	0.036	0.196	1.52596e-12	seurat_exp_0
SPRR2E	1.81263e-16	-1.79828	0.04	0.196	3.27198e-12	seurat_exp_0
CASP14	4.94604e-16	-1.61168	0.043	0.196	8.9281e-12	seurat_exp_0
SPRR2D	2.43466e-15	-1.58396	0.03	0.172	4.3948e-11	seurat_exp_0
SPRR2A	9.26569e-15	-1.55444	0.03	0.169	1.67255e-10	seurat_exp_0
LCE1C	1.28307e-14	-1.48084	0.04	0.183	2.31606e-10	seurat_exp_0
DSC1	1.50213e-14	-1.34739	0.038	0.177	2.7115e-10	seurat_exp_0
ACTA1	6.91445e-14	-1.14415	1	0.825	1.24813e-09	seurat_exp_0
KLK7	1.02446e-13	-1.08887	0.053	0.195	1.84926e-09	seurat_exp_0
LCN2	6.79787e-12	-1.32384	0.045	0.17	1.22708e-07	seurat_exp_0
IGKC	1.47061e-11	-2.46185	1	0.893	2.65461e-07	seurat_exp_0
IGHA1	2.69348e-11	-2.24404	1	0.701	4.862e-07	seurat_exp_0
KRT6C	3.46684e-10	-1.70878	0.085	0.21	6.258e-06	seurat_exp_0
IGHM	6.03557e-10	-2.22801	1	0.56	1.08948e-05	seurat_exp_0
KLK6	7.16866e-10	-1.16165	0.034	0.136	1.29402e-05	seurat_exp_0
FLG2	1.12701e-08	-2.41409	0.091	0.199	0.000203437	seurat_exp_0
HRNR	4.35894e-08	-1.1646	0.096	0.21	0.000786831	seurat_exp_0
KRT2	8.60228e-07	-2.47979	0.1	0.188	0.015528	seurat_exp_0
CDH12	1.36309e-06	-1.04565	0.123	0.203	0.0246051	seurat_exp_0
SORBS2	2.31548e-139	1.42889	0.777	0.242	4.17967e-135	seurat_exp_1
ANGPTL7	3.0584e-131	1.47171	0.98	0.815	5.52072e-127	seurat_exp_1
SDC2	1.24622e-127	1.28877	1	0.889	2.24956e-123	seurat_exp_1
TUBB2B	1.30866e-109	1.01852	0.955	0.802	2.36226e-105	seurat_exp_1
SHISA9	6.01663e-107	1.03324	0.931	0.694	1.08606e-102	seurat_exp_1
NRCAM	1.98529e-100	1.19823	0.998	0.918	3.58365e-96	seurat_exp_1
DOCK10	4.49269e-95	1.11334	0.963	0.811	8.10975e-91	seurat_exp_1
MMP1	1.39215e-74	1.01043	0.522	0.156	2.51298e-70	seurat_exp_1
IGHM	1.66893e-52	-2.37432	0.238	0.671	3.01259e-48	seurat_exp_1
IGHA1	9.87395e-43	-1.90867	0.51	0.772	1.78235e-38	seurat_exp_1
COL17A1	2.39891e-41	-1.87308	0.2	0.556	4.33028e-37	seurat_exp_1
CXCL14	2.57395e-41	-2.61546	0.28	0.577	4.64624e-37	seurat_exp_1
DSG1	1.31627e-40	-2.38282	0.126	0.467	2.37599e-36	seurat_exp_1
DSC3	6.89574e-40	-2.03505	0.223	0.552	1.24475e-35	seurat_exp_1
TRIM29	7.12834e-38	-2.49993	0.265	0.572	1.28674e-33	seurat_exp_1
CALML5	3.73157e-35	-3.31502	0.151	0.469	6.73586e-31	seurat_exp_1
FXYD3	2.77682e-33	-1.57098	0.262	0.562	5.01243e-29	seurat_exp_1
PERP	3.90017e-31	-2.69334	0.309	0.569	7.0402e-27	seurat_exp_1
C19orf33	2.24644e-29	-1.34646	0.213	0.485	4.05505e-25	seurat_exp_1
DSP	2.71874e-28	-3.22442	0.413	0.583	4.90759e-24	seurat_exp_1
COMP	1.04027e-25	-1.46606	0.332	0.603	1.8778e-21	seurat_exp_1
TACSTD2	2.68549e-25	-1.38328	0.262	0.522	4.84759e-21	seurat_exp_1
ACTA1	1.60774e-23	-1.60439	0.678	0.871	2.90213e-19	seurat_exp_1
IGLC1	8.75149e-23	-1.83519	0.426	0.698	1.57973e-18	seurat_exp_1
PKP1	1.51306e-22	-1.6389	0.238	0.474	2.73123e-18	seurat_exp_1
KRT9	2.72717e-22	-3.67281	0.151	0.381	4.92282e-18	seurat_exp_1
SDC1	5.17883e-22	-1.26335	0.428	0.645	9.3483e-18	seurat_exp_1
CLCA2	6.43146e-22	-1.32538	0.181	0.403	1.16094e-17	seurat_exp_1
KLF4	2.19535e-21	-1.02418	0.522	0.719	3.96283e-17	seurat_exp_1
SFRP2	2.02383e-20	-1.17183	0.287	0.497	3.65321e-16	seurat_exp_1
PRDM7	3.2821e-19	-1.432	0.097	0.298	5.92452e-15	seurat_exp_1
KRT10	3.53684e-18	-4.22145	0.762	0.778	6.38435e-14	seurat_exp_1
KRT1	1.54602e-17	-5.11972	0.342	0.507	2.79073e-13	seurat_exp_1
CALML3	8.13569e-17	-1.98239	0.094	0.269	1.46857e-12	seurat_exp_1
FLG	8.1771e-17	-4.76448	0.309	0.497	1.47605e-12	seurat_exp_1
AZGP1	1.02804e-16	-1.14213	0.349	0.549	1.85572e-12	seurat_exp_1
GJA1	1.72739e-16	-1.38689	0.505	0.652	3.11811e-12	seurat_exp_1
CLU	2.41092e-16	-1.28394	0.188	0.358	4.35195e-12	seurat_exp_1
HOPX	5.75446e-16	-1.38865	0.22	0.393	1.03874e-11	seurat_exp_1
KRT14	1.0615e-15	-2.75713	0.589	0.613	1.91612e-11	seurat_exp_1
CRABP2	1.72791e-15	-1.58403	0.488	0.624	3.11904e-11	seurat_exp_1
LY6D	2.07182e-15	-1.49398	0.351	0.538	3.73984e-11	seurat_exp_1
IFFO2	1.41471e-14	-1.05102	0.537	0.7	2.55369e-10	seurat_exp_1
JUP	3.17161e-14	-1.72613	0.46	0.61	5.72507e-10	seurat_exp_1
SBSN	3.32701e-14	-2.39692	0.24	0.425	6.00559e-10	seurat_exp_1
IGKC	1.56797e-13	-2.26547	0.953	0.901	2.83034e-09	seurat_exp_1
CSTA	1.85627e-13	-2.13866	0.337	0.51	3.35076e-09	seurat_exp_1
KRT5	8.95075e-13	-2.48167	0.577	0.599	1.6157e-08	seurat_exp_1
LOR	6.09793e-12	-3.16742	0.168	0.312	1.10074e-07	seurat_exp_1
DSC1	2.04357e-11	-1.45988	0.05	0.173	3.68884e-07	seurat_exp_1
EGR1	3.47964e-11	-1.02583	0.577	0.68	6.2811e-07	seurat_exp_1
CDH12	4.04876e-11	-1.18339	0.079	0.208	7.30842e-07	seurat_exp_1
SFN	1.74161e-10	-1.61614	0.428	0.558	3.14378e-06	seurat_exp_1
S100A14	1.84248e-10	-1.10606	0.252	0.383	3.32586e-06	seurat_exp_1
KRTDAP	1.65535e-09	-3.31826	0.441	0.565	2.98808e-05	seurat_exp_1
FOSB	1.71037e-09	-1.38326	0.347	0.438	3.0874e-05	seurat_exp_1
DCN	4.19819e-09	-1.3003	0.673	0.683	7.57814e-05	seurat_exp_1
SPRR2D	1.46908e-08	-1.05832	0.267	0.138	0.000265183	seurat_exp_1
CASP14	1.63558e-08	-1.68288	0.084	0.187	0.000295238	seurat_exp_1
AQP3	4.59236e-08	-1.01748	0.208	0.3	0.000828966	seurat_exp_1
S100A9	6.51449e-08	-1.64624	0.886	0.702	0.00117593	seurat_exp_1
LYPD3	1.0402e-07	-1.1621	0.171	0.264	0.00187767	seurat_exp_1
IGHG1	3.46339e-07	-1.52094	0.728	0.798	0.00625176	seurat_exp_1
TYRP1	1.11919e-06	-1.27732	0.121	0.208	0.0202024	seurat_exp_1
LRRC7	0	1.33205	0.899	0.103	0	seurat_exp_2
CAND2	0	1.08652	0.873	0.088	0	seurat_exp_2
CDH12	0	3.40656	1	0.1	0	seurat_exp_2
MAMDC2	0	2.68285	1	0.081	0	seurat_exp_2
OR51B5	0	1.43042	0.893	0.046	0	seurat_exp_2
NTRK3	0	1.32063	0.893	0.064	0	seurat_exp_2
PRDM7	0	3.62643	1	0.192	0	seurat_exp_2
CEACAM1	0	1.95231	0.949	0.116	0	seurat_exp_2
SUSD2	0	1.78526	0.977	0.162	0	seurat_exp_2
PORCN	6.2603e-305	1.7874	0.977	0.174	1.13005e-300	seurat_exp_2
RASGRP2	1.31582e-288	2.04605	0.994	0.232	2.37518e-284	seurat_exp_2
SMIM31	3.05204e-286	1.59142	0.955	0.172	5.50923e-282	seurat_exp_2
ADGRG6	6.1884e-285	2.46261	0.997	0.27	1.11707e-280	seurat_exp_2
ANKRD30B	1.31441e-273	1.16909	0.896	0.131	2.37264e-269	seurat_exp_2
PRTG	3.19391e-260	1.69991	0.975	0.245	5.76533e-256	seurat_exp_2
ARX	3.07314e-252	1.12297	0.87	0.133	5.54732e-248	seurat_exp_2
ARHGAP28	1.19786e-245	2.32656	0.994	0.377	2.16227e-241	seurat_exp_2
ENTHD1	4.90009e-242	2.88432	1	0.498	8.84516e-238	seurat_exp_2
FLNC	3.45932e-241	1.47047	0.93	0.203	6.24441e-237	seurat_exp_2
CD5L	9.18211e-241	1.83513	0.775	0.108	1.65746e-236	seurat_exp_2
PMP2	3.37077e-239	3.01906	0.98	0.364	6.08458e-235	seurat_exp_2
RASAL2	2.50216e-229	2.53807	1	0.756	4.51665e-225	seurat_exp_2
B4GALT6	1.26056e-225	1.5949	0.98	0.327	2.27544e-221	seurat_exp_2
FSTL5	1.54395e-223	2.39494	1	0.82	2.78699e-219	seurat_exp_2
ROBO2	4.16223e-222	1.61803	0.989	0.341	7.51324e-218	seurat_exp_2
ACTA1	5.5844e-222	3.72734	1	0.831	1.00804e-217	seurat_exp_2
ZNRF1	1.65382e-221	2.1289	1	0.792	2.98531e-217	seurat_exp_2
CBLB	1.87725e-218	2.01372	0.997	0.676	3.38863e-214	seurat_exp_2
FAM49B	1.8994e-218	2.34462	1	0.973	3.42861e-214	seurat_exp_2
PRRG4	4.73162e-218	1.99538	1	0.766	8.54105e-214	seurat_exp_2
HSPB6	7.42494e-215	2.04705	1	0.657	1.34028e-210	seurat_exp_2
PGAM2	1.21443e-211	1.84482	1	0.891	2.19217e-207	seurat_exp_2
MEST	1.72293e-209	1.4877	1	0.557	3.11006e-205	seurat_exp_2
AKAP12	2.72514e-209	2.09394	1	0.923	4.91914e-205	seurat_exp_2
DST	3.72653e-209	-3.86769	0.228	1	6.72677e-205	seurat_exp_2
SDC2	1.72599e-206	-3.89349	0.068	0.997	3.11559e-202	seurat_exp_2
VAMP8	2.97419e-204	-2.47967	0.177	0.999	5.36871e-200	seurat_exp_2
PRDX1	4.04291e-204	1.55549	1	0.985	7.29785e-200	seurat_exp_2
GAB2	5.36547e-204	1.60483	1	0.967	9.6852e-200	seurat_exp_2
IFI27L2	1.47821e-203	-3.96302	0.273	0.997	2.66832e-199	seurat_exp_2
CAPG	3.71352e-203	1.68868	1	0.974	6.70327e-199	seurat_exp_2
ANKRD28	5.16121e-203	1.24503	1	0.999	9.3165e-199	seurat_exp_2
YAP1	2.9919e-201	1.69049	1	0.992	5.40068e-197	seurat_exp_2
IMMP2L	5.97467e-201	1.60527	1	0.907	1.07849e-196	seurat_exp_2
CRYAB	4.53233e-199	1.33831	1	1	8.18131e-195	seurat_exp_2
IFI27	1.24176e-198	-3.35443	0.614	0.995	2.2415e-194	seurat_exp_2
GMPR	5.4994e-198	-2.69626	0.279	0.994	9.92697e-194	seurat_exp_2
CRTAC1	5.53662e-198	-2.63074	0.082	0.978	9.99415e-194	seurat_exp_2
ACVR1C	7.98247e-197	1.38502	0.966	0.344	1.44092e-192	seurat_exp_2
NPAS2	9.02705e-197	1.49618	1	0.854	1.62947e-192	seurat_exp_2
PCDH7	9.50803e-197	-3.10006	0.262	0.989	1.71629e-192	seurat_exp_2
MREG	1.93588e-196	-2.36287	0.149	0.985	3.49446e-192	seurat_exp_2
SORT1	7.60278e-196	1.45963	1	0.98	1.37238e-191	seurat_exp_2
VEGFB	3.15911e-195	1.18795	1	1	5.70252e-191	seurat_exp_2
ALDH3B1	2.94337e-194	1.49423	1	0.948	5.31309e-190	seurat_exp_2
MBP	1.01404e-193	1.34383	1	1	1.83045e-189	seurat_exp_2
PCSK2	2.04474e-192	-3.34632	0.048	0.958	3.69096e-188	seurat_exp_2
SH3BP4	3.87039e-192	-2.1809	0.251	0.993	6.98645e-188	seurat_exp_2
IFI16	3.04215e-191	-2.74099	0.237	0.976	5.49138e-187	seurat_exp_2
GPM6B	2.28788e-190	1.61861	1	0.908	4.12986e-186	seurat_exp_2
CABIN1	8.69325e-189	1.32013	1	0.915	1.56922e-184	seurat_exp_2
CFL1	1.19202e-188	1.0517	1	1	2.15171e-184	seurat_exp_2
MXRA7	5.02099e-187	1.48208	1	0.995	9.06338e-183	seurat_exp_2
LRRC32	2.86049e-186	1.40565	0.997	0.648	5.16347e-182	seurat_exp_2
DENND2D	5.85407e-186	1.47311	0.983	0.49	1.05672e-181	seurat_exp_2
CD9	8.29271e-186	-1.69506	0.915	1	1.49692e-181	seurat_exp_2
GAPDHS	1.19988e-185	1.52027	1	0.971	2.1659e-181	seurat_exp_2
RYR2	2.51959e-185	1.47689	0.992	0.693	4.54812e-181	seurat_exp_2
HTATIP2	2.99209e-185	1.44396	0.994	0.723	5.40102e-181	seurat_exp_2
FAR2	8.4724e-185	-1.60618	0.014	0.905	1.52935e-180	seurat_exp_2
PYGL	2.0319e-184	-1.99191	0.161	0.972	3.66779e-180	seurat_exp_2
GPR158	3.54655e-184	-2.05003	0.014	0.925	6.40187e-180	seurat_exp_2
DPYSL2	5.45789e-184	-2.16725	0.437	0.995	9.85203e-180	seurat_exp_2
GYPC	5.73175e-184	-2.09573	0.403	0.995	1.03464e-179	seurat_exp_2
ADGRB1	7.7342e-184	1.35333	1	0.958	1.3961e-179	seurat_exp_2
FMNL2	1.81922e-183	-2.50134	0.231	0.971	3.28387e-179	seurat_exp_2
CCDC8	1.26512e-182	-1.71857	0.09	0.955	2.28367e-178	seurat_exp_2
SORL1	2.10007e-182	1.45095	1	0.646	3.79083e-178	seurat_exp_2
TAF10	3.93573e-182	1.03945	1	1	7.10438e-178	seurat_exp_2
CARMIL1	5.97192e-182	-2.2176	0.594	0.995	1.07799e-177	seurat_exp_2
SH3BGRL3	1.80171e-181	-1.68634	0.837	1	3.25227e-177	seurat_exp_2
S100B	2.20011e-181	1.17561	1	0.999	3.97142e-177	seurat_exp_2
FOXRED2	6.01168e-181	1.23853	1	0.904	1.08517e-176	seurat_exp_2
RAB34	1.76742e-180	1.53163	0.997	0.693	3.19037e-176	seurat_exp_2
PRKDC	5.2679e-180	1.00386	1	0.999	9.50909e-176	seurat_exp_2
H2AFJ	7.22582e-177	-1.71283	0.228	0.966	1.30433e-172	seurat_exp_2
DIPK1A	1.64908e-176	-1.57687	0.059	0.923	2.97676e-172	seurat_exp_2
PARVA	3.23228e-175	1.12497	1	0.995	5.83459e-171	seurat_exp_2
HMGA1	1.46277e-174	1.10175	1	0.99	2.64045e-170	seurat_exp_2
TYRP1	2.72281e-174	3.1819	0.718	0.138	4.91495e-170	seurat_exp_2
TDRD3	3.56684e-174	1.40581	1	0.952	6.43851e-170	seurat_exp_2
CCDC85B	4.73364e-174	1.30147	1	0.935	8.54469e-170	seurat_exp_2
KIF13A	5.3153e-173	-1.71295	0.806	0.998	9.59465e-169	seurat_exp_2
IFNGR2	8.90192e-173	1.05077	1	0.992	1.60689e-168	seurat_exp_2
TAFA5	1.38133e-171	1.17747	1	0.917	2.49344e-167	seurat_exp_2
COL11A2	1.60432e-170	-2.06602	0.237	0.966	2.89595e-166	seurat_exp_2
MSN	2.00521e-170	1.10455	1	0.999	3.61961e-166	seurat_exp_2
BTBD10	4.37928e-170	1.03989	1	0.991	7.90504e-166	seurat_exp_2
ANGPTL7	2.72149e-169	-2.34702	0.085	0.92	4.91256e-165	seurat_exp_2
SLC43A1	8.18157e-169	1.24712	0.992	0.861	1.47685e-164	seurat_exp_2
SGK3	1.54522e-168	-1.76755	0.504	0.99	2.78927e-164	seurat_exp_2
ARL2	3.28137e-168	1.13224	1	0.96	5.9232e-164	seurat_exp_2
PACS1	3.58554e-168	1.12718	1	0.959	6.47225e-164	seurat_exp_2
PSAT1	4.52821e-168	1.23241	1	0.908	8.17388e-164	seurat_exp_2
MAPK12	4.22663e-167	1.1634	1	0.95	7.62949e-163	seurat_exp_2
ETS1	6.19005e-167	-1.65215	0.476	0.994	1.11737e-162	seurat_exp_2
PPP1CA	8.88318e-167	1.09208	1	0.988	1.6035e-162	seurat_exp_2
PRSS51	1.41366e-166	1.29479	0.983	0.609	2.5518e-162	seurat_exp_2
ASPH	1.54391e-166	-1.23605	0.997	1	2.78691e-162	seurat_exp_2
BANF1	2.54117e-166	1.08586	1	0.991	4.58706e-162	seurat_exp_2
CDCA5	5.19754e-164	1.08612	0.879	0.257	9.38208e-160	seurat_exp_2
MCM7	6.156e-164	1.03999	1	0.979	1.11122e-159	seurat_exp_2
NIBAN2	6.95827e-164	-1.68375	0.237	0.949	1.25604e-159	seurat_exp_2
TMSB10	3.63692e-163	-1.42608	1	1	6.56501e-159	seurat_exp_2
ATP2B4	3.91529e-163	-1.45799	0.634	0.994	7.06748e-159	seurat_exp_2
MACROD1	9.52268e-163	1.08472	1	0.933	1.71894e-158	seurat_exp_2
KIRREL1	1.30758e-161	1.21573	0.997	0.821	2.36032e-157	seurat_exp_2
FSCN1	4.56817e-161	-1.50594	0.352	0.973	8.246e-157	seurat_exp_2
STAG3	1.04309e-160	1.18735	0.969	0.49	1.88289e-156	seurat_exp_2
CST2	1.31992e-160	-1.84587	0.011	0.838	2.38258e-156	seurat_exp_2
RHOBTB3	2.97226e-160	-1.48906	0.118	0.907	5.36522e-156	seurat_exp_2
SLC25A38	6.86443e-160	1.06086	0.854	0.232	1.2391e-155	seurat_exp_2
MDK	4.12338e-159	1.35504	1	0.85	7.44311e-155	seurat_exp_2
MCUR1	1.08064e-158	1.00547	1	0.973	1.95067e-154	seurat_exp_2
APOD	1.36739e-158	-2.06309	0.017	0.855	2.46827e-154	seurat_exp_2
WSB1	2.00474e-158	-1.29354	0.994	1	3.61876e-154	seurat_exp_2
PPP1R14B	5.39786e-158	1.05032	1	0.932	9.74368e-154	seurat_exp_2
SEMA6B	2.46397e-157	1.03107	0.854	0.23	4.44772e-153	seurat_exp_2
LNPK	1.26795e-156	1.08347	1	0.959	2.28878e-152	seurat_exp_2
POU3F3	9.44671e-156	1.2053	0.966	0.576	1.70523e-151	seurat_exp_2
PRMT3	1.55898e-155	1.03632	1	0.915	2.81411e-151	seurat_exp_2
CLNS1A	3.10763e-155	1.03922	0.997	0.956	5.60958e-151	seurat_exp_2
PITPNM2	3.02241e-154	1.12053	0.986	0.682	5.45576e-150	seurat_exp_2
WWTR1	3.23735e-153	-1.44168	0.515	0.989	5.84374e-149	seurat_exp_2
PSPH	1.93956e-152	1.09557	0.975	0.791	3.50111e-148	seurat_exp_2
RNASE1	4.14724e-152	-2.09483	0.42	0.979	7.48619e-148	seurat_exp_2
CORO2B	4.89775e-152	1.12531	1	0.981	8.84093e-148	seurat_exp_2
RNF182	8.79519e-152	1.10902	0.887	0.288	1.58762e-147	seurat_exp_2
RUNX3	2.03088e-151	1.01544	1	0.97	3.66594e-147	seurat_exp_2
PYCR1	2.4086e-151	1.00653	1	0.936	4.34776e-147	seurat_exp_2
ASS1	4.62461e-151	1.0612	1	0.978	8.34788e-147	seurat_exp_2
PTGDS	6.74886e-151	-2.25604	0.727	0.978	1.21824e-146	seurat_exp_2
SMARCD3	1.62421e-150	1.09537	0.983	0.627	2.93186e-146	seurat_exp_2
POC1A	1.21426e-149	1.02587	0.837	0.244	2.19186e-145	seurat_exp_2
KIF26B	2.9825e-148	-1.35883	0.042	0.832	5.38371e-144	seurat_exp_2
GMNN	3.39014e-148	1.07141	0.986	0.839	6.11955e-144	seurat_exp_2
TSPAN1	4.3115e-148	1.04869	1	0.882	7.7827e-144	seurat_exp_2
LRRN4CL	5.8992e-148	-1.59671	0.045	0.832	1.06487e-143	seurat_exp_2
TRIM2	3.21583e-147	2.20308	0.986	0.93	5.80489e-143	seurat_exp_2
ECM1	6.1277e-146	-1.7017	0.606	0.986	1.10611e-141	seurat_exp_2
MCM4	6.77906e-146	1.01672	1	0.976	1.22369e-141	seurat_exp_2
RCHY1	5.36102e-144	1.01708	1	0.933	9.67719e-140	seurat_exp_2
CENPM	1.02827e-143	1.08391	0.997	0.94	1.85613e-139	seurat_exp_2
S100A10	8.77614e-141	-1.90891	0.214	0.901	1.58418e-136	seurat_exp_2
SLC16A8	2.15384e-140	1.08207	0.966	0.627	3.88789e-136	seurat_exp_2
CDK5R1	3.3605e-140	1.07978	1	0.947	6.06605e-136	seurat_exp_2
MYO5C	6.24003e-140	1.00637	0.958	0.53	1.12639e-135	seurat_exp_2
TJP1	1.3726e-139	-1.22217	0.896	0.998	2.47769e-135	seurat_exp_2
PTPRS	3.33163e-139	1.14308	0.989	0.504	6.01392e-135	seurat_exp_2
CADM1	1.52341e-138	-1.25896	0.242	0.927	2.74991e-134	seurat_exp_2
GJC1	3.83251e-137	1.02503	0.994	0.856	6.91806e-133	seurat_exp_2
EPHA8	1.3082e-136	1.03131	0.963	0.643	2.36144e-132	seurat_exp_2
DMXL2	1.64149e-136	1.0448	0.972	0.561	2.96306e-132	seurat_exp_2
SHISA9	9.82372e-136	-1.3741	0.051	0.799	1.77328e-131	seurat_exp_2
HIST1H1B	1.18585e-135	1.15864	1	0.98	2.14059e-131	seurat_exp_2
EMP1	3.43558e-135	-1.84796	0.344	0.933	6.20157e-131	seurat_exp_2
TESC	2.56537e-134	-1.31425	0.248	0.927	4.63075e-130	seurat_exp_2
WASF2	3.84144e-134	-1.20835	0.651	0.981	6.93418e-130	seurat_exp_2
DSG2	4.88832e-134	1.02552	0.963	0.707	8.82391e-130	seurat_exp_2
MTSS1	2.97107e-133	-1.2589	0.423	0.95	5.36307e-129	seurat_exp_2
APOE	3.49635e-132	-1.73458	0.997	1	6.31126e-128	seurat_exp_2
CPPED1	7.05807e-132	-1.23494	0.315	0.946	1.27405e-127	seurat_exp_2
ANKRD44	2.64395e-131	-1.36633	0.076	0.807	4.77259e-127	seurat_exp_2
IRF4	6.05895e-131	-1.19919	0.397	0.956	1.0937e-126	seurat_exp_2
ETV4	1.58661e-130	1.11155	0.896	0.397	2.864e-126	seurat_exp_2
FRMD4A	4.45296e-130	-1.2113	0.186	0.878	8.03805e-126	seurat_exp_2
GULP1	6.80367e-130	-1.49464	0.068	0.8	1.22813e-125	seurat_exp_2
PNRC1	1.6726e-129	-1.51212	0.577	0.975	3.01921e-125	seurat_exp_2
TM7SF2	2.03908e-129	1.09545	0.915	0.437	3.68074e-125	seurat_exp_2
TRAM2	1.39093e-128	-1.24746	0.513	0.98	2.51077e-124	seurat_exp_2
FOS	1.89244e-128	-4.05796	0.172	0.83	3.41605e-124	seurat_exp_2
LIMD2	2.34041e-127	-1.30232	0.265	0.929	4.22468e-123	seurat_exp_2
GPNMB	3.32573e-127	-1.70952	1	1	6.00328e-123	seurat_exp_2
GTSE1	9.54139e-127	1.03257	0.944	0.615	1.72232e-122	seurat_exp_2
HSPA12A	1.77034e-126	-1.29729	0.341	0.93	3.19564e-122	seurat_exp_2
BTG1	3.12031e-126	-1.60985	0.524	0.946	5.63246e-122	seurat_exp_2
TACC2	6.25663e-126	-1.30081	0.096	0.802	1.12938e-121	seurat_exp_2
ARL6IP5	7.12412e-126	-1.21418	0.465	0.974	1.28598e-121	seurat_exp_2
NDRG1	2.72774e-124	-1.56235	0.592	0.96	4.92385e-120	seurat_exp_2
ARHGAP8	3.73766e-124	1.08574	0.997	0.959	6.74684e-120	seurat_exp_2
LGALS3BP	7.73634e-124	-1.26314	1	1	1.39649e-119	seurat_exp_2
AHNAK2	1.03883e-123	-1.34395	0.527	0.964	1.8752e-119	seurat_exp_2
THRSP	1.23277e-123	-1.15926	0.02	0.736	2.22527e-119	seurat_exp_2
DOCK10	6.39167e-123	-1.47325	0.256	0.894	1.15376e-118	seurat_exp_2
PTPRM	1.28114e-122	-1.30406	0.834	0.993	2.31259e-118	seurat_exp_2
SUCLG1	1.70838e-122	-1.20818	0.735	0.986	3.0838e-118	seurat_exp_2
LBH	1.29542e-120	-1.43144	0.262	0.9	2.33836e-116	seurat_exp_2
JUND	1.05113e-119	-1.61705	0.831	0.987	1.89739e-115	seurat_exp_2
HK1	2.93723e-119	-1.15012	0.583	0.974	5.302e-115	seurat_exp_2
CCDC50	5.73631e-119	-1.20481	0.62	0.972	1.03546e-114	seurat_exp_2
COL6A1	2.0386e-118	-2.37239	0.639	0.97	3.67988e-114	seurat_exp_2
FOSL2	6.17008e-118	-1.45635	0.51	0.936	1.11376e-113	seurat_exp_2
YBX3	2.62791e-117	-1.17688	1	1	4.74364e-113	seurat_exp_2
PHLDA1	1.22675e-116	-1.21044	0.211	0.859	2.21441e-112	seurat_exp_2
GPRC5B	2.40182e-116	-1.19972	0.439	0.948	4.33553e-112	seurat_exp_2
SH3D19	7.31896e-116	-1.12576	0.158	0.818	1.32115e-111	seurat_exp_2
EPAS1	7.73941e-116	-1.27998	0.797	0.996	1.39704e-111	seurat_exp_2
RESF1	9.16001e-115	-1.07621	0.555	0.962	1.65347e-110	seurat_exp_2
GLUL	1.38514e-114	-1.50306	0.642	0.997	2.50031e-110	seurat_exp_2
GNB4	3.1625e-114	-1.12344	0.301	0.923	5.70864e-110	seurat_exp_2
CPM	3.81973e-114	-1.32193	0.561	0.97	6.89499e-110	seurat_exp_2
INSC	4.66054e-114	-1.49023	0.169	0.831	8.41275e-110	seurat_exp_2
SRSF4	6.47156e-114	-1.08623	0.611	0.979	1.16818e-109	seurat_exp_2
TMEM97	1.31863e-113	1.02963	1	0.98	2.38025e-109	seurat_exp_2
CTXND1	4.75538e-113	1.00666	0.915	0.527	8.58393e-109	seurat_exp_2
STAT3	7.65564e-113	-1.13155	0.727	0.989	1.38192e-108	seurat_exp_2
INPP5F	8.69395e-113	-1.14343	0.617	0.972	1.56935e-108	seurat_exp_2
PLBD1	6.54702e-112	-1.41543	0.727	0.974	1.1818e-107	seurat_exp_2
MCL1	3.32999e-111	-1.49966	0.879	0.985	6.01096e-107	seurat_exp_2
AMOTL1	1.0201e-110	-1.13987	0.194	0.836	1.84138e-106	seurat_exp_2
BACH1	1.16154e-110	-1.11792	0.597	0.972	2.09669e-106	seurat_exp_2
CCS	3.39452e-109	-1.03015	0.592	0.968	6.12744e-105	seurat_exp_2
ITGB3	1.07137e-108	-1.05725	0.22	0.841	1.93393e-104	seurat_exp_2
RHOB	2.9986e-108	-1.29153	0.879	0.993	5.41277e-104	seurat_exp_2
C10orf90	3.15432e-108	-1.08903	0.028	0.694	5.69386e-104	seurat_exp_2
BTG2	3.90911e-108	-1.88279	0.2	0.82	7.05634e-104	seurat_exp_2
GRK3	4.33946e-107	-1.39966	0.994	1	7.83315e-103	seurat_exp_2
UBR4	7.99295e-107	-1.02388	0.715	0.978	1.44281e-102	seurat_exp_2
SEMA5A	1.4236e-105	-1.14775	0.789	0.987	2.56973e-101	seurat_exp_2
PDZRN3	1.14436e-104	-1.23574	0.096	0.743	2.06568e-100	seurat_exp_2
FYN	2.76752e-104	-1.1523	0.741	0.982	4.99565e-100	seurat_exp_2
MCC	4.21185e-102	-1.09228	0.282	0.86	7.60282e-98	seurat_exp_2
ITM2B	3.09038e-101	-1.23023	0.682	0.972	5.57845e-97	seurat_exp_2
CASP4	8.9922e-101	-1.09086	0.248	0.851	1.62318e-96	seurat_exp_2
MMP2	9.55534e-100	-2.29003	0.194	0.807	1.72483e-95	seurat_exp_2
LAMC1	1.08092e-99	-1.02964	0.814	0.987	1.95117e-95	seurat_exp_2
ZFP36L2	1.65216e-99	-1.23348	0.8	0.976	2.98231e-95	seurat_exp_2
SCUBE1	2.0609e-99	-1.36584	0.538	0.941	3.72013e-95	seurat_exp_2
SERPINF1	2.17487e-99	-1.00766	0.879	0.994	3.92587e-95	seurat_exp_2
JUN	3.2342e-99	-1.96789	0.287	0.833	5.83806e-95	seurat_exp_2
EPHX1	1.08136e-98	-1.03694	0.524	0.939	1.95196e-94	seurat_exp_2
ITGB5	3.15711e-98	-1.20231	0.625	0.947	5.6989e-94	seurat_exp_2
SNX25	1.06796e-97	-1.03728	0.504	0.945	1.92778e-93	seurat_exp_2
PAG1	2.96299e-96	-1.10819	0.583	0.964	5.34849e-92	seurat_exp_2
CKMT2	6.86466e-96	-1.08154	0.392	0.914	1.23914e-91	seurat_exp_2
GLI3	4.81098e-95	-1.38362	0.256	0.827	8.68429e-91	seurat_exp_2
KRT17	4.1918e-94	-4.04283	0.034	0.663	7.56661e-90	seurat_exp_2
SCPEP1	7.31452e-94	-1.07955	0.251	0.839	1.32034e-89	seurat_exp_2
AHNAK	7.86787e-94	-1.33211	1	1	1.42023e-89	seurat_exp_2
KRT5	2.64735e-92	-4.91466	0.045	0.66	4.77874e-88	seurat_exp_2
SLC25A4	6.13671e-92	-1.34458	0.997	0.998	1.10774e-87	seurat_exp_2
TUBB2A	1.23635e-91	-1.0486	0.532	0.93	2.23173e-87	seurat_exp_2
KRT10	3.26742e-91	-5.11074	0.372	0.822	5.89801e-87	seurat_exp_2
JUNB	6.31809e-91	-2.05667	0.315	0.803	1.14048e-86	seurat_exp_2
KRT14	1.52927e-90	-5.39719	0.073	0.672	2.76049e-86	seurat_exp_2
S100A8	2.9015e-90	-4.5599	0.039	0.646	5.23749e-86	seurat_exp_2
KRT6A	5.95136e-90	-3.87377	0.025	0.637	1.07428e-85	seurat_exp_2
APCDD1	3.59573e-89	-1.71073	0.101	0.693	6.49065e-85	seurat_exp_2
ZFP36	9.80287e-89	-2.20944	0.285	0.778	1.76952e-84	seurat_exp_2
CRABP2	1.85423e-88	-2.52067	0.073	0.67	3.34707e-84	seurat_exp_2
CLIP1	2.62929e-88	-1.11861	0.825	0.973	4.74614e-84	seurat_exp_2
COL6A2	8.33423e-88	-2.37314	0.504	0.879	1.50441e-83	seurat_exp_2
APOC1	1.17242e-87	-1.077	0.451	0.923	2.11634e-83	seurat_exp_2
ZFP36L1	1.3081e-87	-1.84622	0.856	0.96	2.36125e-83	seurat_exp_2
FOXO3	1.6683e-87	-1.0186	0.448	0.91	3.01145e-83	seurat_exp_2
TXNIP	2.50142e-87	-1.69063	0.577	0.904	4.51531e-83	seurat_exp_2
KRT16	9.0749e-87	-4.06034	0.02	0.621	1.63811e-82	seurat_exp_2
DCN	2.91736e-86	-2.84826	0.192	0.738	5.26612e-82	seurat_exp_2
COL3A1	3.52926e-86	-3.10496	0.772	0.953	6.37066e-82	seurat_exp_2
DUSP1	2.39862e-85	-2.14086	0.296	0.775	4.32975e-81	seurat_exp_2
IGSF11	3.68922e-85	-1.17048	0.076	0.655	6.65941e-81	seurat_exp_2
H1F0	5.92406e-85	-1.00672	0.808	0.98	1.06935e-80	seurat_exp_2
C1orf21	7.61179e-85	-1.00168	0.651	0.951	1.374e-80	seurat_exp_2
S100A2	4.94121e-84	-2.88072	0.034	0.618	8.91938e-80	seurat_exp_2
SOCS3	1.01359e-83	-1.64446	0.259	0.795	1.82964e-79	seurat_exp_2
KCNMA1	1.21916e-83	-1.29098	0.946	0.999	2.2007e-79	seurat_exp_2
SLC40A1	2.55159e-83	1.05145	0.921	0.753	4.60587e-79	seurat_exp_2
COL9A1	9.65505e-83	-1.00857	0.237	0.777	1.74283e-78	seurat_exp_2
DSP	9.84999e-83	-4.16179	0.048	0.622	1.77802e-78	seurat_exp_2
IGLC1	1.51954e-82	-3.90974	0.138	0.726	2.74292e-78	seurat_exp_2
SFN	1.79669e-82	-2.91536	0.02	0.602	3.2432e-78	seurat_exp_2
NRCAM	1.42354e-81	-1.47221	0.594	0.966	2.56964e-77	seurat_exp_2
ARRDC3	4.08553e-81	-1.02191	0.78	0.963	7.37478e-77	seurat_exp_2
COL6A3	4.21619e-80	-2.12832	0.366	0.826	7.61064e-76	seurat_exp_2
S100A9	4.36432e-80	-4.32969	0.313	0.771	7.87803e-76	seurat_exp_2
SLC38A2	1.84184e-79	-1.07328	0.989	0.998	3.3247e-75	seurat_exp_2
TF	2.00967e-79	-1.31438	0.955	0.991	3.62765e-75	seurat_exp_2
PERP	3.71238e-78	-3.38592	0.037	0.597	6.70122e-74	seurat_exp_2
TRIM29	5.64483e-78	-3.01288	0.034	0.594	1.01895e-73	seurat_exp_2
S100A11	7.84585e-78	-1.0548	0.946	0.992	1.41625e-73	seurat_exp_2
KRT6B	1.21186e-77	-3.22221	0.031	0.589	2.18752e-73	seurat_exp_2
COL1A1	1.32565e-77	-3.33312	0.693	0.932	2.39293e-73	seurat_exp_2
MAF	1.74289e-77	-1.54215	0.761	0.935	3.14609e-73	seurat_exp_2
KRTDAP	6.20863e-77	-4.34315	0.059	0.607	1.12072e-72	seurat_exp_2
TIMP3	2.59215e-76	-1.37467	0.468	0.891	4.6791e-72	seurat_exp_2
COL1A2	6.29833e-75	-3.10962	0.6	0.896	1.13691e-70	seurat_exp_2
AZGP1	6.40616e-75	-1.64277	0.042	0.581	1.15638e-70	seurat_exp_2
CTNNBIP1	2.56019e-74	-1.13943	0.614	0.931	4.6214e-70	seurat_exp_2
DSC3	3.13551e-73	-2.37834	0.031	0.569	5.65991e-69	seurat_exp_2
IGHG1	2.02129e-72	-3.68075	0.363	0.839	3.64863e-68	seurat_exp_2
BST2	5.48678e-72	-1.0316	0.544	0.956	9.9042e-68	seurat_exp_2
DAAM2	9.32266e-72	-1.01852	0.172	0.684	1.68283e-67	seurat_exp_2
HMOX1	2.2131e-71	1.40111	0.89	0.667	3.99487e-67	seurat_exp_2
IGKC	2.38459e-71	-4.07111	0.594	0.943	4.30442e-67	seurat_exp_2
COL17A1	5.65199e-71	-2.33017	0.039	0.569	1.02024e-66	seurat_exp_2
JCHAIN	8.41156e-71	-1.80521	0.121	0.656	1.51837e-66	seurat_exp_2
LY6D	2.87732e-70	-2.21579	0.048	0.57	5.19385e-66	seurat_exp_2
FXYD3	5.02475e-70	-1.99999	0.062	0.58	9.07017e-66	seurat_exp_2
KRT1	6.22792e-70	-5.88465	0.017	0.541	1.1242e-65	seurat_exp_2
JUP	8.94226e-70	-2.38369	0.138	0.644	1.61417e-65	seurat_exp_2
S100A6	9.58368e-70	-1.84683	0.549	0.859	1.72995e-65	seurat_exp_2
S100A16	6.85244e-69	-1.77181	0.183	0.672	1.23693e-64	seurat_exp_2
SPARC	9.49617e-68	-1.51134	0.997	1	1.71415e-63	seurat_exp_2
ANXA1	6.53547e-67	-2.33145	0.392	0.789	1.17972e-62	seurat_exp_2
C1R	2.44188e-66	-1.7602	0.256	0.73	4.40784e-62	seurat_exp_2
TACSTD2	1.16205e-65	-1.90577	0.042	0.543	2.09761e-61	seurat_exp_2
PDCD4	3.20391e-65	-1.01291	0.794	0.952	5.78337e-61	seurat_exp_2
GJA1	3.44445e-65	-2.09605	0.22	0.682	6.21757e-61	seurat_exp_2
IGHA1	3.48852e-64	-3.69658	0.338	0.788	6.29712e-60	seurat_exp_2
SOD2	5.88085e-64	-1.24108	0.873	0.971	1.06155e-59	seurat_exp_2
ALDH3A2	1.07296e-62	-1.16115	0.259	0.714	1.93681e-58	seurat_exp_2
SPRR1B	2.58068e-62	-3.23002	0.023	0.507	4.65839e-58	seurat_exp_2
IGFBP4	3.29828e-62	-2.09482	0.439	0.79	5.95373e-58	seurat_exp_2
H1FX	2.30652e-61	-1.09298	0.755	0.928	4.1635e-57	seurat_exp_2
PKP1	6.19476e-61	-2.07239	0.017	0.496	1.11822e-56	seurat_exp_2
FLG	2.80497e-60	-5.4189	0.051	0.524	5.06324e-56	seurat_exp_2
BGN	4.09746e-60	-1.31954	0.541	0.899	7.39633e-56	seurat_exp_2
POSTN	1.41082e-58	-1.32152	0.318	0.802	2.54667e-54	seurat_exp_2
CALML5	2.15675e-58	-3.62786	0.014	0.479	3.89316e-54	seurat_exp_2
CSTA	2.22297e-57	-2.76584	0.082	0.537	4.01268e-53	seurat_exp_2
DSG1	1.82532e-56	-2.55524	0.02	0.474	3.29488e-52	seurat_exp_2
COL5A1	1.86845e-56	-1.42006	0.335	0.769	3.37274e-52	seurat_exp_2
CTSK	2.39613e-55	-1.41831	0.22	0.66	4.32525e-51	seurat_exp_2
FBLN2	2.20955e-54	-1.47635	0.183	0.629	3.98846e-50	seurat_exp_2
NECTIN1	2.68335e-54	-1.06888	0.363	0.777	4.84372e-50	seurat_exp_2
C19orf33	8.89418e-54	-1.60848	0.056	0.499	1.60549e-49	seurat_exp_2
PDK1	1.36353e-53	-1.01721	0.225	0.647	2.46131e-49	seurat_exp_2
CXCL14	2.08567e-53	-2.8774	0.166	0.586	3.76484e-49	seurat_exp_2
PRDX2	5.85586e-53	-1.1015	0.262	0.678	1.05704e-48	seurat_exp_2
RLN2	4.46302e-52	-1.22063	0.054	0.488	8.05619e-48	seurat_exp_2
SBSN	1.23975e-51	-2.9209	0.02	0.447	2.23787e-47	seurat_exp_2
PI3	1.28547e-51	-3.47929	0.028	0.456	2.3204e-47	seurat_exp_2
TIMP1	1.98881e-51	-1.02409	0.623	0.912	3.59e-47	seurat_exp_2
C12orf75	1.25865e-49	-1.0412	0.152	0.571	2.27199e-45	seurat_exp_2
CXCL12	1.8957e-49	-1.55508	0.451	0.774	3.42193e-45	seurat_exp_2
SPRR2G	3.36035e-49	-3.44137	0.025	0.439	6.06577e-45	seurat_exp_2
HTRA1	3.92204e-49	-1.10598	0.313	0.732	7.07967e-45	seurat_exp_2
C1S	4.53031e-49	-1.35157	0.268	0.675	8.17767e-45	seurat_exp_2
MRC2	6.53136e-49	-1.10546	0.161	0.571	1.17898e-44	seurat_exp_2
TMSB4X	1.31768e-48	-1.38397	0.992	0.996	2.37854e-44	seurat_exp_2
XBP1	1.61994e-47	-1.26664	0.983	0.99	2.92416e-43	seurat_exp_2
KLF4	1.08515e-46	-1.29077	0.363	0.734	1.95881e-42	seurat_exp_2
IGHM	1.13415e-46	-2.73486	0.228	0.665	2.04725e-42	seurat_exp_2
ANTXR1	1.81641e-46	-1.05877	0.301	0.697	3.2788e-42	seurat_exp_2
CD74	1.85416e-46	-1.18298	0.901	0.965	3.34695e-42	seurat_exp_2
SLC2A1	1.98005e-46	-1.34012	0.096	0.498	3.57419e-42	seurat_exp_2
S100A4	1.98349e-46	-1.22386	0.394	0.77	3.5804e-42	seurat_exp_2
CLCA2	3.46865e-46	-1.64569	0.023	0.418	6.26127e-42	seurat_exp_2
LUM	1.79651e-45	-1.45451	0.341	0.757	3.24287e-41	seurat_exp_2
SDC1	2.02988e-45	-1.60549	0.304	0.655	3.66413e-41	seurat_exp_2
AHR	6.57987e-45	-1.09963	0.468	0.796	1.18773e-40	seurat_exp_2
IGHG3	8.55879e-45	-2.09882	0.152	0.563	1.54495e-40	seurat_exp_2
S100A14	2.41935e-44	-1.58944	0.023	0.408	4.36718e-40	seurat_exp_2
MARCKS	5.86933e-44	-1.03554	0.499	0.802	1.05947e-39	seurat_exp_2
THBS2	1.42761e-43	-1.17	0.223	0.636	2.57698e-39	seurat_exp_2
FOSB	4.17815e-43	-1.82559	0.09	0.466	7.54198e-39	seurat_exp_2
CALD1	9.18314e-43	-1.06748	0.89	0.956	1.65765e-38	seurat_exp_2
PIM2	2.02626e-42	-1.29249	0.411	0.752	3.6576e-38	seurat_exp_2
VCAN	6.59345e-42	-1.1861	0.259	0.647	1.19018e-37	seurat_exp_2
COL14A1	1.19265e-41	-1.41006	0.332	0.691	2.15285e-37	seurat_exp_2
MZB1	1.68602e-41	-1.4112	0.096	0.481	3.04344e-37	seurat_exp_2
IER2	2.52605e-41	-1.14347	0.825	0.914	4.55978e-37	seurat_exp_2
KRT9	7.70566e-41	-3.86203	0.028	0.391	1.39095e-36	seurat_exp_2
LYZ	1.74719e-40	-1.04126	0.431	0.789	3.15386e-36	seurat_exp_2
SPINT2	1.89141e-39	-1.14736	0.166	0.524	3.41418e-35	seurat_exp_2
SLPI	2.40901e-39	-2.39674	0.017	0.368	4.34851e-35	seurat_exp_2
HOPX	5.37807e-39	-1.6623	0.056	0.409	9.70795e-35	seurat_exp_2
COL5A2	8.40009e-38	-1.05508	0.423	0.777	1.5163e-33	seurat_exp_2
DSG3	5.86283e-37	-1.47597	0.042	0.382	1.0583e-32	seurat_exp_2
CNFN	1.25458e-34	-1.98917	0.113	0.441	2.26465e-30	seurat_exp_2
FBN1	2.3415e-34	-1.09369	0.318	0.641	4.22664e-30	seurat_exp_2
LOR	2.58996e-33	-3.40725	0.017	0.327	4.67513e-29	seurat_exp_2
EGR1	8.12829e-33	-1.36745	0.423	0.696	1.46724e-28	seurat_exp_2
IFFO2	2.319e-32	-1.29251	0.445	0.708	4.18604e-28	seurat_exp_2
COL7A1	4.57933e-29	-1.1134	0.07	0.356	8.26615e-25	seurat_exp_2
CALML3	5.20473e-29	-2.1177	0.003	0.277	9.39505e-25	seurat_exp_2
COL12A1	5.64851e-29	-1.0852	0.287	0.614	1.01961e-24	seurat_exp_2
SFRP2	1.27285e-28	-1.2974	0.206	0.503	2.29762e-24	seurat_exp_2
COMP	2.38816e-27	-2.17427	0.335	0.598	4.31087e-23	seurat_exp_2
CLU	1.01455e-26	-1.48023	0.099	0.366	1.83136e-22	seurat_exp_2
CCDC80	1.31841e-26	-1.0945	0.161	0.436	2.37985e-22	seurat_exp_2
LYPD3	9.00536e-26	-1.44558	0.025	0.279	1.62556e-21	seurat_exp_2
FBLN1	9.29667e-26	-1.03353	0.397	0.639	1.67814e-21	seurat_exp_2
KLF5	9.92792e-26	-1.13768	0.031	0.286	1.79209e-21	seurat_exp_2
AQP3	5.7978e-25	-1.26236	0.062	0.315	1.04656e-20	seurat_exp_2
DSC2	1.40722e-23	-1.22199	0.079	0.326	2.54017e-19	seurat_exp_2
PPL	1.16933e-22	-1.14957	0.051	0.284	2.11076e-18	seurat_exp_2
TMEM45A	2.8161e-22	-1.44181	0.079	0.315	5.08333e-18	seurat_exp_2
EGFR	7.19595e-22	-1.06351	0.062	0.29	1.29894e-17	seurat_exp_2
TP63	1.88725e-20	-1.13871	0.048	0.263	3.40668e-16	seurat_exp_2
GJB2	5.52829e-20	-1.23747	0.054	0.266	9.97912e-16	seurat_exp_2
LAD1	6.42532e-18	-1.04301	0.051	0.247	1.15983e-13	seurat_exp_2
FLG2	4.2273e-17	-2.84736	0.023	0.203	7.63069e-13	seurat_exp_2
KRT2	4.84419e-17	-2.96795	0.017	0.194	8.74424e-13	seurat_exp_2
THBS1	5.44322e-17	-1.02915	0.544	0.766	9.82556e-13	seurat_exp_2
SPINK5	4.111e-16	-1.6758	0.037	0.212	7.42077e-12	seurat_exp_2
CD24	7.07285e-16	-1.1459	0.07	0.252	1.27672e-11	seurat_exp_2
KRT6C	7.10732e-16	-2.06773	0.037	0.21	1.28294e-11	seurat_exp_2
KRT23	3.81246e-15	-1.03727	0.065	0.238	6.88187e-11	seurat_exp_2
SPRR2E	5.11871e-15	-1.94415	0.028	0.191	9.23978e-11	seurat_exp_2
KLK8	1.13821e-14	-1.07625	0.048	0.215	2.05459e-10	seurat_exp_2
KLK7	2.98436e-14	-1.30751	0.034	0.192	5.38707e-10	seurat_exp_2
KLK5	5.27068e-14	-1.5056	0.042	0.2	9.51411e-10	seurat_exp_2
SERPINB3	2.59922e-13	-1.46089	0.051	0.205	4.69185e-09	seurat_exp_2
RHCG	4.06245e-13	-1.31558	0.039	0.189	7.33312e-09	seurat_exp_2
DSC1	2.94559e-12	-1.46796	0.034	0.173	5.31708e-08	seurat_exp_2
SPRR2A	4.95642e-12	-1.61992	0.028	0.164	8.94683e-08	seurat_exp_2
SPRR2D	1.33905e-11	-1.66377	0.034	0.167	2.41711e-07	seurat_exp_2
KRT80	5.056e-11	-1.10468	0.042	0.172	9.12659e-07	seurat_exp_2
IVL	5.29291e-11	-1.20577	0.045	0.175	9.55423e-07	seurat_exp_2
CASP14	1.29657e-10	-1.71892	0.059	0.189	2.34044e-06	seurat_exp_2
LCN2	3.33345e-09	-1.48875	0.051	0.165	6.01721e-05	seurat_exp_2
ASPRV1	2.42438e-08	-1.36973	0.101	0.216	0.000437624	seurat_exp_2
GPR158	1.37106e-121	1.42795	0.997	0.816	2.4749e-117	seurat_exp_3
KCNMA1	4.29006e-117	1.0187	1	0.993	7.744e-113	seurat_exp_3
IFI27L2	3.28974e-116	1.43589	1	0.915	5.93831e-112	seurat_exp_3
FMNL2	1.55889e-114	1.45503	0.997	0.886	2.81395e-110	seurat_exp_3
SCUBE1	1.95514e-112	1.23221	1	0.89	3.52923e-108	seurat_exp_3
CRTAC1	2.31831e-110	1.31425	1	0.876	4.18478e-106	seurat_exp_3
NMRK2	7.04881e-107	1.18699	0.997	0.883	1.27238e-102	seurat_exp_3
APOC1	2.84315e-104	1.09438	0.987	0.864	5.13216e-100	seurat_exp_3
TF	7.0089e-102	1.16526	1	0.986	1.26518e-97	seurat_exp_3
ANGPTL7	3.85905e-96	1.45097	0.993	0.819	6.96598e-92	seurat_exp_3
LMNA	3.06991e-95	-1.52854	0.907	0.988	5.5415e-91	seurat_exp_3
GULP1	6.11311e-88	1.35115	0.91	0.707	1.10348e-83	seurat_exp_3
COL11A2	1.22447e-86	1.03664	0.997	0.881	2.21028e-82	seurat_exp_3
IGSF11	2.31634e-83	1.27505	0.86	0.57	4.18122e-79	seurat_exp_3
CNN2	6.91591e-82	-1.33153	0.753	0.931	1.24839e-77	seurat_exp_3
INSC	1.44553e-81	1.34159	0.917	0.748	2.60933e-77	seurat_exp_3
KRT14	2.47953e-76	-5.5802	0.08	0.661	4.4758e-72	seurat_exp_3
FLNA	1.94608e-74	-1.27286	0.643	0.915	3.51287e-70	seurat_exp_3
TMSB4X	4.57651e-74	-1.87479	0.993	0.996	8.26105e-70	seurat_exp_3
KRT5	8.52108e-73	-4.86163	0.083	0.645	1.53814e-68	seurat_exp_3
DSP	1.82686e-72	-4.17968	0.027	0.614	3.29766e-68	seurat_exp_3
S100A9	3.78133e-72	-4.41026	0.323	0.762	6.82568e-68	seurat_exp_3
AHNAK	7.58176e-72	-1.27604	1	1	1.36858e-67	seurat_exp_3
KRT6A	8.29276e-71	-3.81107	0.053	0.624	1.49693e-66	seurat_exp_3
KRT17	2.36822e-68	-3.89674	0.093	0.646	4.27487e-64	seurat_exp_3
KRT16	1.20871e-67	-3.99806	0.05	0.607	2.18184e-63	seurat_exp_3
ANXA1	3.90961e-67	-2.48803	0.373	0.784	7.05723e-63	seurat_exp_3
PERP	1.45001e-66	-3.38024	0.03	0.587	2.61742e-62	seurat_exp_3
ZFP36	1.83617e-66	-2.11476	0.353	0.763	3.31446e-62	seurat_exp_3
JUNB	7.12325e-65	-1.94413	0.447	0.782	1.28582e-60	seurat_exp_3
TPM4	9.86475e-65	-1.09852	0.703	0.932	1.78069e-60	seurat_exp_3
IER2	1.43125e-62	-1.42427	0.72	0.922	2.58355e-58	seurat_exp_3
DCN	4.45801e-62	-2.85617	0.313	0.717	8.04715e-58	seurat_exp_3
S100A2	7.92365e-62	-2.7765	0.077	0.604	1.4303e-57	seurat_exp_3
SFN	1.53993e-61	-2.8311	0.063	0.588	2.77973e-57	seurat_exp_3
TRIM29	1.86865e-61	-2.96605	0.057	0.582	3.37311e-57	seurat_exp_3
MYL9	2.28655e-61	-1.31975	0.95	0.985	4.12746e-57	seurat_exp_3
S100A6	2.39069e-61	-2.02291	0.623	0.846	4.31543e-57	seurat_exp_3
FOS	6.05494e-61	-3.2397	0.513	0.786	1.09298e-56	seurat_exp_3
GJA1	7.39292e-61	-2.15828	0.187	0.677	1.3345e-56	seurat_exp_3
JUND	1.03347e-60	-1.215	0.933	0.975	1.86551e-56	seurat_exp_3
B2M	1.08915e-60	-1.14894	0.997	0.999	1.96603e-56	seurat_exp_3
S100A8	1.41445e-60	-4.31547	0.12	0.628	2.55323e-56	seurat_exp_3
CEBPB	2.30716e-60	-1.28605	0.54	0.862	4.16465e-56	seurat_exp_3
SDC1	3.03039e-60	-1.78037	0.167	0.662	5.47016e-56	seurat_exp_3
RAB34	8.44894e-60	-1.13265	0.3	0.764	1.52512e-55	seurat_exp_3
KRT6B	1.87044e-58	-3.14886	0.067	0.576	3.37633e-54	seurat_exp_3
CXCL14	3.99328e-58	-3.23385	0.09	0.585	7.20827e-54	seurat_exp_3
GSN	4.42666e-58	-1.15165	0.847	0.963	7.99056e-54	seurat_exp_3
COL6A2	1.28325e-57	-2.17022	0.647	0.858	2.3164e-53	seurat_exp_3
COL17A1	9.77279e-57	-2.29166	0.057	0.558	1.76409e-52	seurat_exp_3
MARCKS	1.65151e-56	-1.31368	0.44	0.802	2.98113e-52	seurat_exp_3
C1R	1.99599e-56	-1.85057	0.287	0.718	3.60296e-52	seurat_exp_3
JUN	1.28058e-55	-1.66618	0.487	0.804	2.31158e-51	seurat_exp_3
JUP	2.11918e-55	-2.3501	0.163	0.633	3.82533e-51	seurat_exp_3
MCL1	3.79046e-55	-1.15162	0.937	0.978	6.84216e-51	seurat_exp_3
DSC3	3.85979e-55	-2.3119	0.067	0.556	6.9673e-51	seurat_exp_3
ZFP36L1	5.13841e-55	-1.64327	0.897	0.954	9.27534e-51	seurat_exp_3
FXYD3	8.00526e-55	-1.95487	0.083	0.569	1.44503e-50	seurat_exp_3
LYZ	1.61767e-54	-1.58275	0.413	0.784	2.92006e-50	seurat_exp_3
CRABP2	5.61138e-53	-2.30247	0.2	0.647	1.01291e-48	seurat_exp_3
S100A16	7.23597e-53	-1.72369	0.217	0.661	1.30617e-48	seurat_exp_3
MYOF	1.15086e-52	-1.19897	0.267	0.707	2.07742e-48	seurat_exp_3
DUSP1	2.36195e-52	-1.92709	0.457	0.751	4.26356e-48	seurat_exp_3
TNFSF10	2.27439e-51	-1.11721	0.17	0.628	4.1055e-47	seurat_exp_3
TACSTD2	6.64281e-51	-1.86094	0.067	0.532	1.19909e-46	seurat_exp_3
COL6A1	9.62632e-51	-1.72622	0.897	0.94	1.73765e-46	seurat_exp_3
CAV1	1.106e-50	-1.09557	0.577	0.861	1.99644e-46	seurat_exp_3
LY6D	2.67644e-49	-2.12342	0.103	0.555	4.83124e-45	seurat_exp_3
SH3PXD2A	3.52373e-48	-1.03012	0.293	0.708	6.36068e-44	seurat_exp_3
KRT1	5.54043e-48	-5.75501	0.08	0.526	1.0001e-43	seurat_exp_3
CSTA	1.11433e-47	-2.74203	0.083	0.528	2.01148e-43	seurat_exp_3
COL3A1	1.12944e-47	-2.83149	0.937	0.934	2.03876e-43	seurat_exp_3
COL1A2	2.66489e-47	-3.11921	0.82	0.87	4.8104e-43	seurat_exp_3
TXNIP	2.92917e-47	-1.41856	0.727	0.884	5.28744e-43	seurat_exp_3
PKP1	4.12738e-47	-2.02404	0.04	0.485	7.45034e-43	seurat_exp_3
JAG1	4.5982e-47	-1.15726	0.303	0.71	8.30021e-43	seurat_exp_3
FLG	4.69784e-47	-5.36211	0.07	0.514	8.48007e-43	seurat_exp_3
FSTL1	5.58001e-47	-1.35804	0.633	0.849	1.00725e-42	seurat_exp_3
IGFBP4	7.12157e-47	-2.06979	0.523	0.776	1.28552e-42	seurat_exp_3
SRGN	8.83461e-47	-1.03445	0.533	0.865	1.59473e-42	seurat_exp_3
S100A4	2.37476e-46	-1.39688	0.393	0.763	4.28669e-42	seurat_exp_3
TPM1	4.19927e-46	-1.23741	0.563	0.834	7.5801e-42	seurat_exp_3
KRTDAP	7.92476e-46	-4.15831	0.167	0.587	1.4305e-41	seurat_exp_3
CAVIN1	2.50956e-45	-1.2922	0.34	0.736	4.53e-41	seurat_exp_3
CLTB	4.28482e-45	-1.24926	0.713	0.897	7.73453e-41	seurat_exp_3
CALD1	4.49165e-45	-1.17938	0.903	0.953	8.10787e-41	seurat_exp_3
PTPRS	5.01293e-45	-1.03019	0.173	0.59	9.04885e-41	seurat_exp_3
SPRR1B	8.37559e-45	-3.1458	0.063	0.495	1.51188e-40	seurat_exp_3
COL1A1	8.88446e-45	-3.22019	0.903	0.908	1.60373e-40	seurat_exp_3
S100A10	2.28041e-44	-1.15709	0.6	0.852	4.11637e-40	seurat_exp_3
CCN1	1.03919e-43	-1.18025	0.45	0.82	1.87583e-39	seurat_exp_3
ARID5B	3.19326e-43	-1.04705	0.25	0.648	5.76416e-39	seurat_exp_3
AHR	9.76461e-43	-1.17114	0.463	0.791	1.76261e-38	seurat_exp_3
DSG1	1.08353e-42	-2.49598	0.047	0.464	1.95588e-38	seurat_exp_3
EGR1	1.45128e-42	-1.51114	0.327	0.7	2.61971e-38	seurat_exp_3
C19orf33	2.34733e-42	-1.58675	0.077	0.489	4.23716e-38	seurat_exp_3
PALLD	4.01333e-42	-1.20543	0.32	0.702	7.24447e-38	seurat_exp_3
C1S	8.42473e-42	-1.42177	0.29	0.666	1.52075e-37	seurat_exp_3
MAF	1.61677e-41	-1.28281	0.823	0.926	2.91844e-37	seurat_exp_3
CALML5	2.44071e-41	-3.54018	0.06	0.467	4.40572e-37	seurat_exp_3
PTPRD	9.43254e-41	1.30836	0.567	0.264	1.70267e-36	seurat_exp_3
SBSN	1.01113e-40	-2.87484	0.033	0.438	1.82519e-36	seurat_exp_3
COL6A3	1.09299e-40	-1.77422	0.573	0.798	1.97296e-36	seurat_exp_3
COL5A1	7.93729e-40	-1.41754	0.427	0.753	1.43276e-35	seurat_exp_3
SPRR2G	4.21113e-39	-3.39773	0.037	0.431	7.60152e-35	seurat_exp_3
CRIP1	5.02283e-39	-1.06345	0.31	0.691	9.06671e-35	seurat_exp_3
PRDX2	7.02511e-39	-1.04897	0.31	0.666	1.2681e-34	seurat_exp_3
KLF4	1.36922e-38	-1.30931	0.397	0.725	2.47159e-34	seurat_exp_3
EHD2	1.73462e-38	-1.1144	0.367	0.717	3.13117e-34	seurat_exp_3
THBS2	3.25215e-38	-1.3387	0.26	0.625	5.87046e-34	seurat_exp_3
NOTCH3	1.33175e-37	-1.09423	0.41	0.773	2.40393e-33	seurat_exp_3
MMP2	2.21582e-37	-1.79262	0.547	0.763	3.99977e-33	seurat_exp_3
CLCA2	1.96153e-36	-1.60808	0.037	0.41	3.54076e-32	seurat_exp_3
THBS1	2.02297e-36	-1.42294	0.42	0.774	3.65166e-32	seurat_exp_3
SOD2	2.28307e-36	-1.08005	0.947	0.962	4.12116e-32	seurat_exp_3
CFD	2.86741e-36	-1.22098	0.537	0.813	5.17596e-32	seurat_exp_3
SFRP2	4.46536e-36	-1.55944	0.143	0.504	8.06041e-32	seurat_exp_3
CTSK	6.55843e-36	-1.33709	0.307	0.644	1.18386e-31	seurat_exp_3
AQP1	7.00957e-36	-1.33924	0.49	0.773	1.2653e-31	seurat_exp_3
IFFO2	9.69479e-36	-1.3528	0.38	0.709	1.75001e-31	seurat_exp_3
CD74	1.65772e-35	-1.23575	0.947	0.959	2.99235e-31	seurat_exp_3
COMP	2.89091e-35	-2.65073	0.25	0.602	5.21839e-31	seurat_exp_3
PCOLCE	1.42773e-34	-1.04822	0.247	0.605	2.5772e-30	seurat_exp_3
SOCS3	3.64925e-34	-1.27232	0.477	0.765	6.58726e-30	seurat_exp_3
FBLN1	6.52565e-34	-1.16289	0.307	0.644	1.17795e-29	seurat_exp_3
APCDD1	1.06513e-33	-1.31935	0.333	0.66	1.92266e-29	seurat_exp_3
HMOX1	1.83314e-33	-1.17075	0.367	0.721	3.30901e-29	seurat_exp_3
KRT10	3.36439e-33	-4.58786	0.66	0.787	6.07307e-29	seurat_exp_3
COL5A2	4.71331e-33	-1.11735	0.437	0.769	8.508e-29	seurat_exp_3
LUM	6.54325e-33	-1.69436	0.447	0.74	1.18112e-28	seurat_exp_3
FBLN2	6.66974e-33	-1.37998	0.28	0.612	1.20395e-28	seurat_exp_3
ENTHD1	9.51472e-33	-1.21331	0.23	0.579	1.7175e-28	seurat_exp_3
FBN1	1.26421e-32	-1.21253	0.313	0.636	2.28203e-28	seurat_exp_3
SPINT2	2.48556e-31	-1.12287	0.18	0.517	4.48668e-27	seurat_exp_3
S100A14	5.45638e-31	-1.51781	0.063	0.397	9.84931e-27	seurat_exp_3
SLC2A1	7.43751e-31	-1.26293	0.153	0.485	1.34255e-26	seurat_exp_3
PI3	3.23013e-30	-3.32306	0.107	0.441	5.83071e-26	seurat_exp_3
SPARC	7.93332e-30	-1.23587	1	1	1.43204e-25	seurat_exp_3
VCAN	1.08081e-29	-1.20697	0.337	0.633	1.95097e-25	seurat_exp_3
BTG2	1.47792e-29	-1.24377	0.573	0.774	2.6678e-25	seurat_exp_3
KRT9	3.14661e-29	-3.79416	0.06	0.382	5.67994e-25	seurat_exp_3
FOSB	1.96253e-28	-1.72678	0.147	0.454	3.54256e-24	seurat_exp_3
CXCL12	3.58004e-28	-1.35686	0.53	0.761	6.46234e-24	seurat_exp_3
CNFN	1.06242e-27	-1.95116	0.12	0.435	1.91778e-23	seurat_exp_3
PECAM1	1.45058e-27	-1.01611	0.563	0.813	2.61843e-23	seurat_exp_3
HTRA1	8.06692e-27	-1.01002	0.433	0.713	1.45616e-22	seurat_exp_3
COL12A1	8.69565e-27	-1.1894	0.293	0.608	1.56965e-22	seurat_exp_3
SLPI	4.5858e-26	-2.31062	0.063	0.358	8.27782e-22	seurat_exp_3
DSG3	2.3442e-25	-1.41011	0.083	0.372	4.23152e-21	seurat_exp_3
HOPX	3.07725e-24	-1.55794	0.117	0.397	5.55475e-20	seurat_exp_3
CLU	3.07597e-23	-1.48037	0.093	0.362	5.55244e-19	seurat_exp_3
LOR	4.57113e-23	-3.33768	0.05	0.318	8.25134e-19	seurat_exp_3
COL14A1	4.08192e-22	-1.25898	0.437	0.674	7.36828e-18	seurat_exp_3
FN1	1.17803e-21	-1.22389	0.67	0.839	2.12646e-17	seurat_exp_3
IGHM	1.48908e-21	-1.24323	0.313	0.649	2.68793e-17	seurat_exp_3
CCDC80	3.38459e-20	-1.11998	0.19	0.428	6.10952e-16	seurat_exp_3
RLN2	3.55629e-20	1.1803	0.603	0.428	6.41946e-16	seurat_exp_3
CALML3	4.11597e-19	-2.04452	0.04	0.268	7.42974e-15	seurat_exp_3
LYPD3	2.13743e-18	-1.3941	0.05	0.272	3.85827e-14	seurat_exp_3
COL7A1	2.84157e-18	-1.02999	0.12	0.346	5.12932e-14	seurat_exp_3
IGHG3	3.24127e-18	-1.4661	0.267	0.545	5.85082e-14	seurat_exp_3
EGFR	1.41616e-17	-1.05094	0.07	0.285	2.55632e-13	seurat_exp_3
PRDM7	3.35104e-17	-1.44381	0.073	0.294	6.04895e-13	seurat_exp_3
CCN2	4.78368e-17	-1.00327	0.49	0.72	8.63503e-13	seurat_exp_3
TMEM45A	1.03537e-16	-1.40918	0.097	0.309	1.86894e-12	seurat_exp_3
GJB2	1.82111e-16	-1.21845	0.057	0.262	3.28728e-12	seurat_exp_3
TP63	3.44603e-16	-1.1157	0.057	0.259	6.22043e-12	seurat_exp_3
ACTA1	1.9143e-15	-1.54107	0.663	0.866	3.4555e-11	seurat_exp_3
AQP3	3.07176e-15	-1.1767	0.11	0.306	5.54483e-11	seurat_exp_3
PPL	4.48623e-15	-1.08502	0.083	0.277	8.09808e-11	seurat_exp_3
KRT23	1.34083e-14	-1.04544	0.05	0.236	2.42032e-10	seurat_exp_3
KLF5	6.36113e-14	-1.03539	0.093	0.275	1.14825e-09	seurat_exp_3
TAGLN	8.75737e-14	-1.03988	0.733	0.856	1.58079e-09	seurat_exp_3
KRT2	4.10138e-13	-2.93191	0.027	0.19	7.40341e-09	seurat_exp_3
LAD1	1.58197e-12	-1.00591	0.073	0.241	2.85562e-08	seurat_exp_3
IGHG1	3.17894e-12	-2.63084	0.753	0.793	5.73831e-08	seurat_exp_3
FLG2	3.40474e-12	-2.79612	0.04	0.198	6.14589e-08	seurat_exp_3
DSC2	7.51975e-12	-1.10634	0.15	0.315	1.35739e-07	seurat_exp_3
KRT80	7.044e-11	-1.10899	0.03	0.171	1.27151e-06	seurat_exp_3
LCN2	1.06959e-10	-1.50217	0.027	0.165	1.93072e-06	seurat_exp_3
SPINK5	2.09739e-09	-1.60668	0.073	0.206	3.78601e-05	seurat_exp_3
KLK7	2.51936e-09	-1.25023	0.057	0.187	4.5477e-05	seurat_exp_3
IVL	3.39363e-09	-1.18918	0.047	0.173	6.12584e-05	seurat_exp_3
SPRR2D	4.15083e-09	-1.63283	0.04	0.164	7.49267e-05	seurat_exp_3
SPRR2E	5.81562e-09	-1.88032	0.06	0.186	0.000104978	seurat_exp_3
IGHA1	7.1375e-09	-1.46555	0.577	0.757	0.000128839	seurat_exp_3
SPRR2A	5.32465e-08	-1.5716	0.047	0.16	0.000961152	seurat_exp_3
TYRP1	6.60627e-08	-1.30802	0.09	0.208	0.0011925	seurat_exp_3
IGLC1	7.54511e-08	-1.40348	0.48	0.684	0.00136197	seurat_exp_3
DSC1	7.88535e-08	-1.41916	0.057	0.168	0.00142338	seurat_exp_3
KLK5	2.03158e-07	-1.42694	0.083	0.194	0.00366721	seurat_exp_3
KLK8	2.42641e-07	-1.00238	0.097	0.207	0.00437991	seurat_exp_3
KRT6C	2.84318e-07	-1.96981	0.093	0.202	0.00513223	seurat_exp_3
IGKC	3.30837e-07	-2.52232	0.947	0.904	0.00597194	seurat_exp_3
RHCG	1.03564e-06	-1.23844	0.08	0.183	0.0186943	seurat_exp_3
CDH12	1.58968e-06	-1.14158	0.1	0.201	0.0286953	seurat_exp_3
LINGO2	1.28807e-299	1.31252	0.861	0.084	2.32509e-295	seurat_exp_4
PCSK2	9.44063e-176	2.73828	1	0.852	1.70413e-171	seurat_exp_4
SLC30A4	3.81134e-174	1.35222	0.925	0.22	6.87986e-170	seurat_exp_4
SYBU	1.57973e-157	1.42239	1	0.983	2.85157e-153	seurat_exp_4
MIA	7.45753e-149	1.12354	1	0.999	1.34616e-144	seurat_exp_4
IFI27L2	7.94005e-149	1.85888	1	0.915	1.43326e-144	seurat_exp_4
MLANA	5.82218e-146	1.15238	1	1	1.05096e-141	seurat_exp_4
LGI3	1.57111e-143	1.25301	1	0.968	2.83601e-139	seurat_exp_4
ALX1	6.37763e-139	1.19965	1	0.984	1.15123e-134	seurat_exp_4
DST	8.05838e-138	1.13267	1	0.913	1.45462e-133	seurat_exp_4
ASAP1	2.20438e-136	1.01539	1	0.999	3.97912e-132	seurat_exp_4
CAPN3	2.03172e-135	1.06245	1	0.997	3.66745e-131	seurat_exp_4
CARMIL1	6.67574e-134	1.24951	1	0.949	1.20504e-129	seurat_exp_4
PRKG2	5.45466e-133	1.03	1	0.994	9.8462e-129	seurat_exp_4
CTSF	1.47178e-131	1.30892	1	0.988	2.6567e-127	seurat_exp_4
SCUBE1	4.16996e-128	1.31859	1	0.891	7.52719e-124	seurat_exp_4
CST2	2.30766e-127	1.30316	0.993	0.73	4.16555e-123	seurat_exp_4
CITED1	3.46305e-127	1.23116	0.973	0.742	6.25116e-123	seurat_exp_4
LRRN4CL	1.19062e-126	1.3574	0.99	0.729	2.14918e-122	seurat_exp_4
RAMP1	1.26694e-125	1.04936	1	0.996	2.28695e-121	seurat_exp_4
CSGALNACT1	3.52179e-125	1.00449	1	0.999	6.35719e-121	seurat_exp_4
PHKB	3.86236e-124	1.09181	1	0.958	6.97195e-120	seurat_exp_4
GRK3	9.24209e-124	1.07207	1	0.999	1.66829e-119	seurat_exp_4
RAB27A	9.1201e-123	1.05634	1	0.968	1.64627e-118	seurat_exp_4
INTS6L	4.35049e-119	1.15755	0.966	0.56	7.85307e-115	seurat_exp_4
IGKC	6.48475e-119	-6.81029	0.582	0.938	1.17056e-114	seurat_exp_4
ADAM23	1.56856e-118	1.16031	0.997	0.88	2.83141e-114	seurat_exp_4
COL1A1	4.47811e-118	-5.04496	0.51	0.944	8.08343e-114	seurat_exp_4
CD74	1.43012e-114	-2.34488	0.721	0.98	2.58152e-110	seurat_exp_4
BMPR1B	1.78325e-113	1.00026	1	0.992	3.21894e-109	seurat_exp_4
GDF11	2.51447e-113	1.02957	1	0.978	4.53886e-109	seurat_exp_4
TNIK	9.86315e-113	1.16142	1	0.976	1.7804e-108	seurat_exp_4
S100A6	1.82561e-112	-2.89787	0.259	0.88	3.29541e-108	seurat_exp_4
COL1A2	2.16305e-112	-4.63386	0.405	0.908	3.90452e-108	seurat_exp_4
SDC2	1.15925e-111	1.32371	1	0.893	2.09256e-107	seurat_exp_4
PDE4D	1.29321e-111	1.02307	1	0.928	2.33436e-107	seurat_exp_4
TMSB4X	4.5424e-111	-2.37001	0.969	0.998	8.19949e-107	seurat_exp_4
CPNE5	3.06699e-109	1.07437	0.959	0.685	5.53622e-105	seurat_exp_4
HMGA2	5.63296e-108	1.02901	0.772	0.215	1.01681e-103	seurat_exp_4
CRTAC1	6.99385e-108	1.28678	1	0.876	1.26246e-103	seurat_exp_4
PRKACB	6.26782e-106	-1.41691	0.514	0.983	1.1314e-101	seurat_exp_4
IGHA1	1.11271e-105	-5.47708	0.092	0.802	2.00856e-101	seurat_exp_4
L1CAM	2.72195e-102	1.11157	0.949	0.587	4.91339e-98	seurat_exp_4
IGHG1	4.40175e-102	-5.51552	0.224	0.842	7.9456e-98	seurat_exp_4
LYZ	1.99045e-101	-2.13698	0.129	0.81	3.59296e-97	seurat_exp_4
FOS	4.45276e-100	-3.9513	0.207	0.814	8.03768e-96	seurat_exp_4
B2M	2.8296e-99	-1.51	0.997	0.999	5.10771e-95	seurat_exp_4
CNN2	4.10022e-98	-1.51429	0.622	0.942	7.40131e-94	seurat_exp_4
C1R	2.76553e-95	-2.24083	0.048	0.74	4.99206e-91	seurat_exp_4
DCN	2.87712e-95	-3.40479	0.058	0.74	5.19348e-91	seurat_exp_4
NMRK2	1.31504e-94	1.05848	0.997	0.884	2.37378e-90	seurat_exp_4
S100A4	1.91019e-94	-1.86646	0.129	0.787	3.44808e-90	seurat_exp_4
COL3A1	2.44748e-92	-3.63541	0.701	0.956	4.41795e-88	seurat_exp_4
IFI27	3.65805e-91	1.00713	1	0.952	6.60315e-87	seurat_exp_4
JUNB	4.07109e-91	-2.25113	0.214	0.803	7.34873e-87	seurat_exp_4
LUM	8.0821e-91	-2.42054	0.129	0.769	1.4589e-86	seurat_exp_4
SOD2	5.37625e-90	-1.60684	0.816	0.974	9.70468e-86	seurat_exp_4
COL6A2	1.6006e-86	-2.66923	0.449	0.876	2.88925e-82	seurat_exp_4
S100A9	2.76355e-86	-4.61232	0.194	0.773	4.98848e-82	seurat_exp_4
IGLC1	2.79942e-86	-4.39962	0.071	0.721	5.05323e-82	seurat_exp_4
ZFP36	1.07453e-85	-2.36215	0.211	0.775	1.93963e-81	seurat_exp_4
IGHM	1.09515e-83	-3.37873	0.037	0.674	1.97685e-79	seurat_exp_4
SRGN	1.6561e-83	-1.40206	0.364	0.88	2.98943e-79	seurat_exp_4
FSTL1	8.47774e-83	-1.77214	0.432	0.867	1.53032e-78	seurat_exp_4
MMP2	9.78787e-83	-2.4016	0.248	0.79	1.76681e-78	seurat_exp_4
KRT14	8.00858e-81	-5.71196	0.031	0.664	1.44563e-76	seurat_exp_4
GJA1	9.72722e-81	-2.35116	0.065	0.688	1.75586e-76	seurat_exp_4
ANXA1	2.01029e-80	-2.63311	0.255	0.794	3.62878e-76	seurat_exp_4
COL6A3	2.84853e-80	-2.44823	0.303	0.823	5.14187e-76	seurat_exp_4
EMP1	1.45658e-79	-1.4697	0.544	0.903	2.62927e-75	seurat_exp_4
IGFBP4	1.89339e-78	-2.48393	0.293	0.797	3.41775e-74	seurat_exp_4
GSN	2.41348e-78	-1.36888	0.85	0.963	4.35658e-74	seurat_exp_4
MYL9	3.58415e-78	-1.50523	0.874	0.992	6.46975e-74	seurat_exp_4
DUSP1	4.19838e-78	-2.24846	0.265	0.769	7.57849e-74	seurat_exp_4
KRT5	6.47836e-78	-4.93206	0.027	0.649	1.16941e-73	seurat_exp_4
MCL1	1.8518e-77	-1.35981	0.942	0.978	3.34268e-73	seurat_exp_4
TPM4	2.94102e-77	-1.20994	0.622	0.939	5.30884e-73	seurat_exp_4
KRT17	2.9812e-77	-3.99346	0.031	0.651	5.38136e-73	seurat_exp_4
FLNA	4.36064e-77	-1.31199	0.524	0.925	7.87139e-73	seurat_exp_4
CEBPD	5.12513e-77	-1.1765	0.878	0.976	9.25138e-73	seurat_exp_4
SDC1	1.58662e-76	-1.92544	0.071	0.67	2.864e-72	seurat_exp_4
C1S	3.76721e-76	-1.76276	0.085	0.684	6.80018e-72	seurat_exp_4
MARCKS	8.26891e-76	-1.54021	0.31	0.814	1.49262e-71	seurat_exp_4
THBS1	2.59945e-75	-1.88888	0.221	0.792	4.69227e-71	seurat_exp_4
TAP1	2.99734e-75	-1.20064	0.711	0.971	5.4105e-71	seurat_exp_4
ZFP36L1	5.2658e-75	-1.88039	0.83	0.96	9.5053e-71	seurat_exp_4
LMNA	1.54379e-74	-1.35225	0.942	0.985	2.7867e-70	seurat_exp_4
JCHAIN	4.23135e-73	-2.07898	0.061	0.652	7.63801e-69	seurat_exp_4
CRABP2	5.27401e-73	-2.52119	0.075	0.658	9.52011e-69	seurat_exp_4
S100A8	5.36715e-73	-4.52166	0.041	0.635	9.68825e-69	seurat_exp_4
SOCS3	9.31589e-73	-1.67529	0.255	0.785	1.68161e-68	seurat_exp_4
KRT6A	2.03695e-72	-3.82115	0.027	0.625	3.6769e-68	seurat_exp_4
TXNIP	2.76683e-72	-1.6936	0.633	0.893	4.9944e-68	seurat_exp_4
ST5	4.66235e-72	-1.00132	0.745	0.965	8.41601e-68	seurat_exp_4
FN1	9.94541e-72	-1.95651	0.395	0.864	1.79525e-67	seurat_exp_4
VCAN	4.13114e-71	-1.6674	0.082	0.656	7.45713e-67	seurat_exp_4
STAT1	4.3002e-71	-1.2094	0.605	0.942	7.7623e-67	seurat_exp_4
EHBP1L1	4.78906e-71	-1.06506	0.762	0.948	8.64474e-67	seurat_exp_4
COL5A1	5.14363e-71	-1.78925	0.235	0.77	9.28477e-67	seurat_exp_4
DSP	1.38895e-70	-4.18547	0.031	0.613	2.50719e-66	seurat_exp_4
AEBP1	1.48985e-70	-1.19725	0.952	0.996	2.68932e-66	seurat_exp_4
KRT16	1.94502e-70	-4.02253	0.02	0.609	3.51096e-66	seurat_exp_4
ZYX	4.73715e-70	-1.00517	0.765	0.959	8.55103e-66	seurat_exp_4
CXCL14	8.52621e-70	-3.42149	0.003	0.593	1.53907e-65	seurat_exp_4
THBS2	2.26658e-68	-1.65319	0.071	0.642	4.09141e-64	seurat_exp_4
BHLHE40	4.32826e-68	-1.00832	0.823	0.975	7.81294e-64	seurat_exp_4
S100A2	5.63162e-68	-2.82219	0.034	0.607	1.01656e-63	seurat_exp_4
TRIM29	6.07227e-68	-3.03389	0.01	0.585	1.0961e-63	seurat_exp_4
FBLN2	1.23114e-67	-1.7995	0.071	0.631	2.22233e-63	seurat_exp_4
PERP	1.39471e-67	-3.39624	0.014	0.588	2.5176e-63	seurat_exp_4
ANTXR1	6.58136e-67	-1.39507	0.163	0.703	1.188e-62	seurat_exp_4
CTSK	7.24092e-67	-1.66727	0.116	0.661	1.30706e-62	seurat_exp_4
LCP1	1.26074e-66	-1.16904	0.272	0.802	2.27577e-62	seurat_exp_4
PSMB8	1.70417e-66	-1.07765	0.588	0.928	3.07619e-62	seurat_exp_4
IFI30	4.04199e-66	-1.15225	0.435	0.871	7.29619e-62	seurat_exp_4
IER2	9.03398e-66	-1.45808	0.721	0.922	1.63072e-61	seurat_exp_4
SFN	1.39348e-65	-2.86916	0.027	0.59	2.51538e-61	seurat_exp_4
PIM2	2.62792e-65	-1.57724	0.248	0.761	4.74366e-61	seurat_exp_4
KCTD12	3.56384e-65	-1.3732	0.503	0.869	6.43308e-61	seurat_exp_4
CEBPB	5.08995e-65	-1.33212	0.507	0.865	9.18787e-61	seurat_exp_4
IFITM3	3.15204e-64	-1.0929	0.864	0.97	5.68974e-60	seurat_exp_4
PECAM1	5.13503e-64	-1.40946	0.344	0.833	9.26924e-60	seurat_exp_4
COL6A1	5.97426e-64	-1.93872	0.912	0.938	1.07841e-59	seurat_exp_4
MAF	6.40701e-64	-1.52921	0.803	0.927	1.15653e-59	seurat_exp_4
AHR	1.01213e-63	-1.3571	0.33	0.802	1.827e-59	seurat_exp_4
ITGB5	1.03661e-63	-1.03649	0.701	0.933	1.87118e-59	seurat_exp_4
S100A16	1.17024e-62	-1.78698	0.136	0.667	2.1124e-58	seurat_exp_4
BTG1	1.9057e-62	-1.19135	0.752	0.917	3.43998e-58	seurat_exp_4
COMP	2.28595e-62	-3.314	0.082	0.617	4.12638e-58	seurat_exp_4
H1FX	1.04867e-61	-1.17831	0.741	0.926	1.89295e-57	seurat_exp_4
KRT6B	1.85993e-61	-3.17705	0.041	0.577	3.35736e-57	seurat_exp_4
COL17A1	1.92935e-61	-2.34975	0.024	0.56	3.48266e-57	seurat_exp_4
ARHGDIB	2.12757e-61	-1.15524	0.456	0.879	3.84048e-57	seurat_exp_4
DSC3	1.17308e-60	-2.36509	0.027	0.559	2.11753e-56	seurat_exp_4
TNFSF10	2.50455e-60	-1.19868	0.112	0.632	4.52096e-56	seurat_exp_4
IFFO2	4.16821e-60	-1.56061	0.228	0.723	7.52403e-56	seurat_exp_4
MAFB	4.27114e-60	-1.1771	0.293	0.783	7.70984e-56	seurat_exp_4
JUP	4.96023e-60	-2.38636	0.122	0.636	8.95372e-56	seurat_exp_4
SPI1	5.17792e-60	-1.07181	0.497	0.88	9.34666e-56	seurat_exp_4
YAP1	8.16509e-60	-1.00064	0.963	0.996	1.47388e-55	seurat_exp_4
BTG2	8.82345e-60	-1.6405	0.381	0.791	1.59272e-55	seurat_exp_4
RUNX1	1.43174e-59	-1.12965	0.245	0.731	2.58444e-55	seurat_exp_4
APCDD1	1.84214e-59	-1.58616	0.18	0.674	3.32524e-55	seurat_exp_4
JUN	4.15286e-59	-1.72241	0.469	0.805	7.49633e-55	seurat_exp_4
IL32	4.17734e-59	-1.16294	0.204	0.708	7.54052e-55	seurat_exp_4
CCN1	4.49759e-59	-1.34502	0.357	0.828	8.11859e-55	seurat_exp_4
TMEM176B	7.19386e-59	-1.14268	0.347	0.82	1.29856e-54	seurat_exp_4
IRF1	7.29509e-59	-1.05886	0.187	0.686	1.31684e-54	seurat_exp_4
KLF4	1.28007e-58	-1.51806	0.279	0.735	2.31065e-54	seurat_exp_4
COL12A1	2.40527e-58	-1.55914	0.119	0.623	4.34176e-54	seurat_exp_4
SPARC	4.52504e-58	-1.48497	1	1	8.16815e-54	seurat_exp_4
MYOF	1.08649e-57	-1.24886	0.224	0.71	1.96123e-53	seurat_exp_4
RASAL2	1.12781e-57	-1.32629	0.347	0.822	2.03581e-53	seurat_exp_4
CAVIN1	2.20239e-57	-1.41791	0.265	0.742	3.97553e-53	seurat_exp_4
AQP1	1.28086e-56	-1.6322	0.344	0.786	2.31208e-52	seurat_exp_4
XBP1	1.40185e-56	-1.40057	0.983	0.99	2.53048e-52	seurat_exp_4
ELL2	1.92943e-56	-1.16026	0.211	0.686	3.48282e-52	seurat_exp_4
EGR1	8.11687e-56	-1.62352	0.235	0.708	1.46518e-51	seurat_exp_4
FXYD3	1.26596e-55	-1.96901	0.071	0.57	2.28518e-51	seurat_exp_4
COL14A1	2.14888e-55	-1.68143	0.218	0.694	3.87895e-51	seurat_exp_4
TM4SF1	4.15143e-55	-1.2274	0.214	0.69	7.49374e-51	seurat_exp_4
KRT1	1.80618e-54	-5.83293	0.034	0.53	3.26033e-50	seurat_exp_4
JAG1	2.61884e-54	-1.2277	0.252	0.714	4.72727e-50	seurat_exp_4
KRT10	8.36304e-54	-4.86191	0.537	0.798	1.50961e-49	seurat_exp_4
CSTA	3.58508e-53	-2.79348	0.044	0.531	6.47142e-49	seurat_exp_4
TYMP	4.13466e-53	-1.07053	0.565	0.859	7.46347e-49	seurat_exp_4
COL18A1	8.87367e-53	-1.04368	0.49	0.885	1.60179e-48	seurat_exp_4
FBN1	1.54483e-52	-1.45211	0.187	0.647	2.78858e-48	seurat_exp_4
SERPING1	4.72208e-52	-1.14172	0.241	0.702	8.52383e-48	seurat_exp_4
TACSTD2	5.31278e-52	-1.87127	0.051	0.533	9.5901e-48	seurat_exp_4
COL5A2	1.28686e-51	-1.34195	0.327	0.779	2.32292e-47	seurat_exp_4
PRSS23	2.14307e-51	-1.06609	0.728	0.939	3.86845e-47	seurat_exp_4
TPM1	4.511e-51	-1.27943	0.493	0.84	8.1428e-47	seurat_exp_4
EHD2	1.15679e-50	-1.22841	0.279	0.724	2.08812e-46	seurat_exp_4
IFI44L	1.36015e-50	-1.11005	0.272	0.741	2.45521e-46	seurat_exp_4
CCN2	2.42511e-50	-1.35476	0.276	0.739	4.37756e-46	seurat_exp_4
MRC2	4.30358e-50	-1.20466	0.105	0.568	7.7684e-46	seurat_exp_4
ATP1B3	4.39635e-50	-1.16512	0.711	0.924	7.93585e-46	seurat_exp_4
FLG	5.92575e-50	-5.40346	0.048	0.515	1.06966e-45	seurat_exp_4
SULF2	2.16735e-49	-1.07349	0.122	0.58	3.91228e-45	seurat_exp_4
PKP1	2.19961e-49	-2.05003	0.02	0.486	3.97052e-45	seurat_exp_4
CNN3	3.15486e-48	-1.03271	0.612	0.882	5.69484e-44	seurat_exp_4
PRDX2	4.2596e-48	-1.12502	0.231	0.673	7.689e-44	seurat_exp_4
PDK1	5.70851e-48	-1.03922	0.201	0.641	1.03044e-43	seurat_exp_4
CALML5	7.64604e-48	-3.60275	0.014	0.47	1.38019e-43	seurat_exp_4
CLTB	1.97049e-47	-1.28167	0.673	0.901	3.55692e-43	seurat_exp_4
ARID5B	2.3374e-47	-1.07029	0.204	0.652	4.21925e-43	seurat_exp_4
PRRG4	2.46687e-47	-1.05996	0.418	0.824	4.45294e-43	seurat_exp_4
TIMP1	1.57275e-46	-1.06692	0.656	0.903	2.83898e-42	seurat_exp_4
RAB34	3.88466e-46	-1.02162	0.357	0.758	7.01219e-42	seurat_exp_4
LY6D	3.33852e-45	-2.0871	0.119	0.553	6.02636e-41	seurat_exp_4
PCOLCE	8.59085e-45	-1.16742	0.177	0.611	1.55074e-40	seurat_exp_4
SPINT2	1.47889e-44	-1.25855	0.092	0.524	2.66954e-40	seurat_exp_4
CDH11	2.44119e-44	-1.22184	0.136	0.561	4.4066e-40	seurat_exp_4
TIMP3	4.23018e-44	-1.16221	0.633	0.868	7.63589e-40	seurat_exp_4
C19orf33	7.25946e-44	-1.60641	0.061	0.49	1.31041e-39	seurat_exp_4
SELENOM	7.41639e-44	-1.02129	0.173	0.594	1.33873e-39	seurat_exp_4
DSG1	7.80059e-44	-2.51156	0.034	0.464	1.40808e-39	seurat_exp_4
ZNRF1	1.44641e-43	-1.07277	0.49	0.844	2.61091e-39	seurat_exp_4
MZB1	2.00979e-43	-1.54519	0.051	0.478	3.62786e-39	seurat_exp_4
SPRR1B	2.7955e-43	-3.14151	0.068	0.493	5.04616e-39	seurat_exp_4
POSTN	4.37491e-43	-1.39227	0.371	0.788	7.89716e-39	seurat_exp_4
C12orf75	1.51418e-42	-1.06832	0.15	0.563	2.73324e-38	seurat_exp_4
SFRP2	3.61463e-42	-1.61209	0.092	0.508	6.52476e-38	seurat_exp_4
BGN	1.31939e-41	-1.20924	0.633	0.883	2.38163e-37	seurat_exp_4
KRTDAP	2.29554e-41	-4.11828	0.187	0.585	4.14368e-37	seurat_exp_4
HMOX1	3.62479e-41	-1.27864	0.333	0.723	6.5431e-37	seurat_exp_4
MEGF6	6.40839e-41	-1.14398	0.136	0.539	1.15678e-36	seurat_exp_4
SBSN	2.60981e-40	-2.87622	0.031	0.438	4.71097e-36	seurat_exp_4
SELENOP	4.9558e-38	-1.01531	0.85	0.929	8.94572e-34	seurat_exp_4
SLC2A1	5.33454e-37	-1.31541	0.102	0.489	9.62937e-33	seurat_exp_4
PALLD	5.04614e-36	-1.10168	0.33	0.701	9.10879e-32	seurat_exp_4
CFD	4.9242e-35	-1.21162	0.524	0.813	8.88868e-31	seurat_exp_4
SPRR2G	6.0929e-35	-3.36585	0.058	0.428	1.09983e-30	seurat_exp_4
HTRA1	1.52916e-34	-1.09986	0.357	0.72	2.76028e-30	seurat_exp_4
CXCL12	4.16116e-34	-1.33936	0.442	0.768	7.51131e-30	seurat_exp_4
CLCA2	4.83201e-34	-1.59061	0.048	0.408	8.72225e-30	seurat_exp_4
PI3	1.1392e-32	-3.36631	0.088	0.442	2.05637e-28	seurat_exp_4
CCDC80	1.51918e-32	-1.27223	0.088	0.437	2.74227e-28	seurat_exp_4
FOSB	1.58388e-32	-1.78266	0.112	0.457	2.85907e-28	seurat_exp_4
CALD1	2.45288e-31	-1.02422	0.891	0.954	4.42769e-27	seurat_exp_4
TRIM2	4.52916e-31	-1.04731	0.769	0.952	8.17559e-27	seurat_exp_4
ACTA1	2.73695e-30	-1.73527	0.612	0.871	4.94048e-26	seurat_exp_4
HOPX	5.91285e-30	-1.61267	0.068	0.401	1.06733e-25	seurat_exp_4
KRT9	1.88964e-29	-3.79928	0.054	0.382	3.41099e-25	seurat_exp_4
DSG3	2.99053e-29	-1.45359	0.051	0.375	5.3982e-25	seurat_exp_4
SLPI	3.40311e-29	-2.3447	0.037	0.36	6.14295e-25	seurat_exp_4
COL7A1	4.47747e-29	-1.16223	0.034	0.354	8.08228e-25	seurat_exp_4
FBLN1	4.48805e-29	-1.11661	0.34	0.64	8.10138e-25	seurat_exp_4
S100A14	6.10047e-28	-1.49527	0.082	0.395	1.1012e-23	seurat_exp_4
IGHG3	3.66396e-27	-1.85269	0.211	0.549	6.61382e-23	seurat_exp_4
CNFN	6.20002e-27	-1.95011	0.122	0.434	1.11917e-22	seurat_exp_4
TAGLN	6.30559e-27	-1.14376	0.616	0.867	1.13822e-22	seurat_exp_4
EGFR	1.75056e-24	-1.13105	0.014	0.29	3.15993e-20	seurat_exp_4
C3	2.04445e-24	-1.04115	0.044	0.326	3.69044e-20	seurat_exp_4
LOR	7.12451e-24	-3.348	0.041	0.319	1.28605e-19	seurat_exp_4
PRDM7	9.63731e-22	-1.49284	0.037	0.297	1.73963e-17	seurat_exp_4
AQP3	1.13572e-20	-1.2471	0.061	0.31	2.0501e-16	seurat_exp_4
CLU	1.16476e-20	-1.46207	0.112	0.359	2.10251e-16	seurat_exp_4
ENTHD1	1.14409e-19	-1.07311	0.306	0.572	2.0652e-15	seurat_exp_4
LYPD3	1.3884e-19	-1.40552	0.037	0.273	2.50621e-15	seurat_exp_4
CALML3	1.63956e-19	-2.05096	0.034	0.268	2.95957e-15	seurat_exp_4
PPL	8.17133e-18	-1.12406	0.058	0.279	1.47501e-13	seurat_exp_4
PMP2	1.00057e-17	-1.13442	0.207	0.447	1.80612e-13	seurat_exp_4
TMEM45A	7.24199e-17	-1.40942	0.092	0.309	1.30725e-12	seurat_exp_4
GJB2	2.05837e-16	-1.22008	0.054	0.262	3.71556e-12	seurat_exp_4
DSC2	2.6751e-15	-1.1635	0.116	0.318	4.82882e-11	seurat_exp_4
TP63	5.61989e-15	-1.10767	0.065	0.258	1.01445e-10	seurat_exp_4
KRT23	3.44295e-14	-1.04256	0.051	0.235	6.21487e-10	seurat_exp_4
SPINK5	1.07319e-13	-1.6603	0.034	0.209	1.93721e-09	seurat_exp_4
KLK8	1.53194e-13	-1.08476	0.037	0.212	2.7653e-09	seurat_exp_4
TNXB	1.85784e-13	-1.00626	0.262	0.436	3.35358e-09	seurat_exp_4
KLF5	9.74444e-13	-1.02203	0.102	0.274	1.75897e-08	seurat_exp_4
KRT2	5.99822e-12	-2.91912	0.034	0.189	1.08274e-07	seurat_exp_4
DSC1	1.82773e-11	-1.46458	0.024	0.171	3.29923e-07	seurat_exp_4
SPRR2E	6.66106e-11	-1.90051	0.041	0.187	1.20239e-06	seurat_exp_4
FLG2	2.50089e-10	-2.77832	0.054	0.196	4.51436e-06	seurat_exp_4
CD24	7.92329e-10	-1.08677	0.102	0.246	1.43023e-05	seurat_exp_4
KLK5	1.65571e-09	-1.46057	0.061	0.196	2.98872e-05	seurat_exp_4
KLK7	1.89219e-09	-1.26126	0.054	0.187	3.41559e-05	seurat_exp_4
KRT80	2.3397e-09	-1.08689	0.041	0.169	4.22339e-05	seurat_exp_4
SPRR2A	2.4964e-09	-1.59261	0.034	0.161	4.50625e-05	seurat_exp_4
TYRP1	1.46315e-08	-1.31792	0.082	0.208	0.000264114	seurat_exp_4
SPRR2D	1.71873e-08	-1.62972	0.044	0.163	0.000310248	seurat_exp_4
CDH12	2.07961e-08	-1.17013	0.078	0.203	0.00037539	seurat_exp_4
CASP14	2.56322e-08	-1.69178	0.065	0.186	0.000462686	seurat_exp_4
LCE3D	3.83746e-08	-1.25651	0.051	0.168	0.000692701	seurat_exp_4
IVL	7.78427e-08	-1.17172	0.058	0.171	0.00140514	seurat_exp_4
SERPINB3	8.13947e-08	-1.39977	0.082	0.199	0.00146926	seurat_exp_4
KRT6C	5.63175e-07	-1.9652	0.095	0.202	0.0101659	seurat_exp_4
CRCT1	1.47491e-06	-1.04721	0.078	0.181	0.0266236	seurat_exp_4
RHCG	1.9103e-06	-1.23451	0.082	0.183	0.0344828	seurat_exp_4
LOR	9.55706e-144	1.41801	0.897	0.243	1.72515e-139	seurat_exp_5
FLG	3.31496e-127	1.45669	0.989	0.431	5.98384e-123	seurat_exp_5
SPRR2G	3.55991e-126	1.37068	0.971	0.347	6.426e-122	seurat_exp_5
FLG2	8.98707e-114	1.21821	0.67	0.143	1.62226e-109	seurat_exp_5
CALML5	6.39037e-108	1.12874	0.982	0.384	1.15353e-103	seurat_exp_5
MT-ND6	2.65652e-87	1.01535	1	1	4.79528e-83	seurat_exp_5
HBA2	6.22764e-69	2.93761	0.392	0.079	1.12415e-64	seurat_exp_5
CXCL8	3.25726e-61	2.88665	0.502	0.16	5.87967e-57	seurat_exp_5
AZGP1	1.80637e-54	1.03495	0.923	0.492	3.26068e-50	seurat_exp_5
ASPRV1	1.37653e-46	1.03389	0.498	0.179	2.48477e-42	seurat_exp_5
HRNR	2.82644e-44	1.08195	0.473	0.171	5.10201e-40	seurat_exp_5
ZNF550	1.0657e-40	1.9109	0.993	0.71	1.92369e-36	seurat_exp_5
HBB	3.73404e-35	1.18303	0.22	0.045	6.74032e-31	seurat_exp_5
G0S2	7.55003e-27	2.1054	0.421	0.207	1.36286e-22	seurat_exp_5
SOD2	7.02955e-25	1.01767	1	0.957	1.2689e-20	seurat_exp_5
IL1B	7.81575e-21	1.17525	0.326	0.143	1.41082e-16	seurat_exp_5
IGHG3	1.57405e-18	-1.04559	0.941	0.484	2.84131e-14	seurat_exp_5
IGHM	1.574e-09	-1.75693	0.989	0.588	2.84123e-05	seurat_exp_5
ZNF549	1.83936e-09	1.77867	0.399	0.317	3.32023e-05	seurat_exp_5
IGLC1	9.0255e-08	-2.70274	0.993	0.638	0.00162919	seurat_exp_5
IGHG1	1.84277e-06	-2.66116	1	0.772	0.0332638	seurat_exp_5
QDPR	1.08268e-106	1.14583	1	0.996	1.95434e-102	seurat_exp_6
PRKACB	7.63014e-97	1.32198	0.996	0.939	1.37732e-92	seurat_exp_6
PCDH7	3.50469e-91	1.41144	0.996	0.908	6.32632e-87	seurat_exp_6
COL9A1	4.9444e-89	1.26886	0.97	0.703	8.92513e-85	seurat_exp_6
DAAM2	1.64699e-81	1.23076	0.928	0.61	2.97298e-77	seurat_exp_6
GPNMB	1.00486e-79	1.02402	1	1	1.81388e-75	seurat_exp_6
AKAP12	6.82686e-77	-1.61573	0.562	0.958	1.23232e-72	seurat_exp_6
APOC1	2.64538e-76	1.11895	0.983	0.866	4.77517e-72	seurat_exp_6
GSN	7.66128e-76	-1.54855	0.774	0.966	1.38294e-71	seurat_exp_6
PSMB8	3.04749e-73	1.01658	1	0.892	5.50103e-69	seurat_exp_6
LIMD2	7.38481e-70	1.01892	0.974	0.853	1.33303e-65	seurat_exp_6
PDE4D	1.23462e-69	-1.21567	0.494	0.966	2.22861e-65	seurat_exp_6
SORL1	3.83696e-67	-1.21861	0.094	0.725	6.92609e-63	seurat_exp_6
CAPG	1.0905e-66	-1.36117	0.915	0.981	1.96846e-62	seurat_exp_6
NOG	9.91386e-63	1.1198	0.613	0.18	1.78955e-58	seurat_exp_6
PRRG4	3.24147e-54	-1.20933	0.323	0.824	5.85117e-50	seurat_exp_6
IFI6	1.34414e-50	1.09328	1	0.943	2.42631e-46	seurat_exp_6
FSTL5	3.07138e-50	-1.26625	0.396	0.87	5.54415e-46	seurat_exp_6
COMP	5.90784e-50	-3.36312	0.085	0.607	1.06642e-45	seurat_exp_6
AHNAK	9.38601e-47	-1.17107	1	1	1.69427e-42	seurat_exp_6
ACTA2	1.46791e-46	-1.52087	0.315	0.796	2.64973e-42	seurat_exp_6
FSTL1	6.0031e-44	-1.39014	0.498	0.854	1.08362e-39	seurat_exp_6
CXCL14	8.41993e-42	-3.15281	0.123	0.573	1.51988e-37	seurat_exp_6
LMNA	7.26791e-41	-1.10886	0.97	0.982	1.31193e-36	seurat_exp_6
AQP1	2.84466e-39	-1.50538	0.383	0.775	5.13489e-35	seurat_exp_6
CAV1	4.15056e-39	-1.08031	0.545	0.858	7.49217e-35	seurat_exp_6
TAGLN	2.79981e-38	-1.46956	0.579	0.865	5.05394e-34	seurat_exp_6
PALLD	1.94349e-36	-1.21139	0.277	0.698	3.50819e-32	seurat_exp_6
SELENOP	2.98252e-36	-1.0411	0.664	0.941	5.38374e-32	seurat_exp_6
TIMP3	1.05728e-34	-1.12972	0.57	0.868	1.9085e-30	seurat_exp_6
KRT1	7.53947e-34	-5.67064	0.106	0.515	1.36095e-29	seurat_exp_6
IGFBP4	2.96408e-31	-1.91718	0.515	0.771	5.35046e-27	seurat_exp_6
IGHM	4.88904e-31	1.01652	0.8	0.607	8.8252e-27	seurat_exp_6
CAVIN1	7.10111e-30	-1.17097	0.379	0.725	1.28182e-25	seurat_exp_6
JAG1	1.14557e-29	-1.0128	0.328	0.7	2.06786e-25	seurat_exp_6
RASAL2	3.55102e-29	-1.12812	0.451	0.805	6.40995e-25	seurat_exp_6
TPM1	8.06116e-29	-1.05455	0.574	0.827	1.45512e-24	seurat_exp_6
THBS2	3.94924e-28	-1.31255	0.268	0.617	7.12878e-24	seurat_exp_6
EHD2	4.17928e-28	-1.01948	0.353	0.711	7.54402e-24	seurat_exp_6
CFD	1.46933e-27	-1.18895	0.54	0.807	2.65229e-23	seurat_exp_6
S100A16	1.83009e-27	-1.463	0.285	0.647	3.3035e-23	seurat_exp_6
FLG	2.19759e-27	-5.20701	0.145	0.5	3.96686e-23	seurat_exp_6
ADIRF	4.39984e-27	-1.08259	0.247	0.591	7.94216e-23	seurat_exp_6
RLN2	6.48044e-27	-1.10978	0.106	0.468	1.16978e-22	seurat_exp_6
IFFO2	1.13079e-26	-1.2677	0.357	0.704	2.0412e-22	seurat_exp_6
ZFP36L1	1.77397e-26	-1.30074	0.919	0.951	3.2022e-22	seurat_exp_6
NOTCH3	1.78048e-26	-1.03974	0.451	0.762	3.21395e-22	seurat_exp_6
CALD1	6.54724e-26	-1.04035	0.919	0.951	1.18184e-21	seurat_exp_6
ENTHD1	9.37396e-26	-1.1853	0.217	0.573	1.69209e-21	seurat_exp_6
DUSP1	2.55275e-25	-1.4966	0.553	0.738	4.60796e-21	seurat_exp_6
MAF	3.56834e-25	-1.10162	0.86	0.921	6.44122e-21	seurat_exp_6
KRT10	3.67789e-24	-4.49844	0.647	0.785	6.63895e-20	seurat_exp_6
MYL9	4.2928e-24	-1.0029	0.983	0.982	7.74894e-20	seurat_exp_6
SFN	1.61798e-23	-2.30212	0.243	0.564	2.92062e-19	seurat_exp_6
JUN	2.99269e-23	-1.28725	0.6	0.79	5.40211e-19	seurat_exp_6
DSG1	7.04597e-23	-2.30863	0.128	0.449	1.27187e-18	seurat_exp_6
PERP	1.38566e-22	-2.7479	0.26	0.559	2.50126e-18	seurat_exp_6
FOSB	5.84891e-22	-1.68804	0.145	0.448	1.05579e-17	seurat_exp_6
CCN2	6.66893e-22	-1.07136	0.387	0.723	1.20381e-17	seurat_exp_6
CALML5	1.31902e-21	-3.33315	0.145	0.452	2.38097e-17	seurat_exp_6
JUP	1.6442e-21	-1.97676	0.319	0.612	2.96794e-17	seurat_exp_6
PKP1	6.0201e-21	-1.78102	0.17	0.467	1.08669e-16	seurat_exp_6
CXCL12	8.31457e-21	-1.18709	0.498	0.758	1.50086e-16	seurat_exp_6
KRT9	1.00535e-20	-3.73295	0.077	0.374	1.81476e-16	seurat_exp_6
LY6D	1.0889e-20	-1.7868	0.238	0.536	1.96557e-16	seurat_exp_6
COL14A1	1.21955e-20	-1.28946	0.396	0.673	2.20141e-16	seurat_exp_6
DSP	1.61908e-20	-3.20924	0.345	0.579	2.9226e-16	seurat_exp_6
SPARC	2.49767e-20	-1.11864	1	1	4.50854e-16	seurat_exp_6
FXYD3	1.86753e-19	-1.53291	0.26	0.547	3.37107e-15	seurat_exp_6
SBSN	1.88184e-19	-2.62579	0.128	0.423	3.39692e-15	seurat_exp_6
ANXA1	1.90223e-19	-1.78717	0.583	0.76	3.43372e-15	seurat_exp_6
C19orf33	2.84775e-19	-1.3348	0.187	0.473	5.14048e-15	seurat_exp_6
PRDM7	8.73875e-19	-1.49276	0.026	0.293	1.57743e-14	seurat_exp_6
FBLN1	1.30362e-18	-1.01051	0.379	0.632	2.35317e-14	seurat_exp_6
KLF4	1.31598e-18	-1.07537	0.464	0.713	2.37548e-14	seurat_exp_6
FOS	3.50508e-18	-2.16326	0.74	0.764	6.32702e-14	seurat_exp_6
SFRP2	6.82226e-18	-1.37619	0.238	0.49	1.23149e-13	seurat_exp_6
KRT6A	1.08228e-17	-2.84568	0.353	0.59	1.95363e-13	seurat_exp_6
KRT5	3.87513e-17	-3.35333	0.46	0.607	6.995e-13	seurat_exp_6
DSC3	2.64595e-16	-1.72844	0.268	0.531	4.7762e-12	seurat_exp_6
KRT6B	2.64871e-16	-2.45413	0.285	0.55	4.78119e-12	seurat_exp_6
SDC1	3.94784e-16	-1.29768	0.387	0.636	7.12624e-12	seurat_exp_6
KRT16	4.79148e-16	-3.06613	0.345	0.575	8.6491e-12	seurat_exp_6
TRIM29	3.01564e-15	-2.28969	0.328	0.552	5.44353e-11	seurat_exp_6
COL6A3	4.23807e-15	-1.2682	0.689	0.785	7.65014e-11	seurat_exp_6
CSTA	4.24218e-15	-2.26445	0.251	0.507	7.65755e-11	seurat_exp_6
PMP2	4.31147e-15	-1.09494	0.187	0.444	7.78264e-11	seurat_exp_6
CRABP2	6.5749e-15	-1.71292	0.426	0.622	1.18683e-10	seurat_exp_6
SPRR1B	6.8923e-15	-2.54829	0.209	0.475	1.24413e-10	seurat_exp_6
SPRR2G	9.00323e-15	-3.0301	0.162	0.414	1.62517e-10	seurat_exp_6
COL17A1	1.70337e-14	-1.69613	0.298	0.53	3.07475e-10	seurat_exp_6
COL1A2	1.70925e-14	-2.22409	0.851	0.866	3.08537e-10	seurat_exp_6
KRTDAP	2.21363e-14	-3.44868	0.323	0.567	3.99582e-10	seurat_exp_6
THBS1	2.78573e-14	-1.11568	0.532	0.759	5.02852e-10	seurat_exp_6
KRT14	6.19759e-14	-3.22198	0.519	0.617	1.11873e-09	seurat_exp_6
COL12A1	8.15051e-14	-1.05543	0.353	0.597	1.47125e-09	seurat_exp_6
LOR	1.24566e-13	-3.24642	0.094	0.31	2.24854e-09	seurat_exp_6
KRT17	9.95191e-13	-2.65872	0.434	0.61	1.79642e-08	seurat_exp_6
TACSTD2	1.25106e-12	-1.35492	0.298	0.506	2.25828e-08	seurat_exp_6
ZFP36	2.79875e-12	-1.00193	0.634	0.734	5.05202e-08	seurat_exp_6
COL3A1	5.99669e-12	-1.69953	0.915	0.936	1.08246e-07	seurat_exp_6
CCDC80	6.56942e-12	-1.01838	0.234	0.42	1.18585e-07	seurat_exp_6
COL1A1	8.36802e-12	-2.24158	0.936	0.905	1.51051e-07	seurat_exp_6
EGR1	3.81496e-11	-1.0555	0.502	0.68	6.88638e-07	seurat_exp_6
JUNB	1.55594e-10	-1.047	0.736	0.754	2.80863e-06	seurat_exp_6
S100A2	1.76937e-10	-1.69185	0.362	0.573	3.19389e-06	seurat_exp_6
COL6A2	2.13492e-10	-1.12054	0.826	0.841	3.85374e-06	seurat_exp_6
S100A14	7.34125e-10	-1.20762	0.209	0.38	1.32517e-05	seurat_exp_6
CLCA2	7.50214e-10	-1.2408	0.221	0.389	1.35421e-05	seurat_exp_6
HOPX	8.59964e-10	-1.3747	0.221	0.383	1.55232e-05	seurat_exp_6
FBLN2	2.10134e-09	-1.02294	0.443	0.594	3.79312e-05	seurat_exp_6
SLPI	2.90204e-09	-1.95215	0.17	0.344	5.23847e-05	seurat_exp_6
CDH12	3.33482e-09	-1.19338	0.051	0.203	6.01968e-05	seurat_exp_6
SPP1	4.22796e-09	1.27182	0.63	0.578	7.63188e-05	seurat_exp_6
GJA1	2.05159e-08	-1.40476	0.532	0.642	0.000370333	seurat_exp_6
FLG2	2.63893e-08	-2.74847	0.055	0.194	0.000476353	seurat_exp_6
CALML3	6.11121e-08	-1.87588	0.119	0.258	0.00110314	seurat_exp_6
DCN	1.2509e-07	-1.34062	0.626	0.686	0.00225801	seurat_exp_6
S100A8	1.97308e-07	-2.35255	0.43	0.595	0.00356161	seurat_exp_6
KRT2	2.20039e-06	-2.83721	0.072	0.184	0.0397192	seurat_exp_6
CLU	2.62536e-06	-1.17253	0.243	0.345	0.0473903	seurat_exp_6
KRT15	7.65107e-133	2.68136	0.705	0.139	1.3811e-128	seurat_exp_7
CXCL14	5.11273e-123	2.54878	1	0.509	9.22898e-119	seurat_exp_7
KRT5	7.17958e-120	3.09723	1	0.567	1.29599e-115	seurat_exp_7
KRT14	3.52294e-116	2.72163	1	0.582	6.35926e-112	seurat_exp_7
COL17A1	1.62242e-111	2.43333	1	0.479	2.92863e-107	seurat_exp_7
DSP	2.97756e-111	2.65213	1	0.531	5.37479e-107	seurat_exp_7
KRT1	3.84025e-108	2.28088	1	0.45	6.93203e-104	seurat_exp_7
LY6D	8.71657e-105	1.99414	1	0.481	1.57343e-100	seurat_exp_7
TRIM29	2.47286e-104	2.226	1	0.503	4.46377e-100	seurat_exp_7
APCDD1	2.7802e-104	1.89241	1	0.605	5.01854e-100	seurat_exp_7
KRT10	3.82621e-103	2.60612	1	0.76	6.9067e-99	seurat_exp_7
DSC3	1.22172e-100	2.25763	1	0.478	2.20533e-96	seurat_exp_7
ZFP36L1	6.50634e-98	1.5606	1	0.945	1.17446e-93	seurat_exp_7
KRT6A	3.74626e-96	2.03855	1	0.543	6.76238e-92	seurat_exp_7
PERP	1.18264e-94	2.01303	1	0.506	2.13479e-90	seurat_exp_7
CALML3	5.29975e-94	2.3332	0.744	0.212	9.56658e-90	seurat_exp_7
DSG1	7.76183e-93	2.2332	0.919	0.392	1.40109e-88	seurat_exp_7
FOS	1.64353e-92	1.99385	1	0.745	2.96673e-88	seurat_exp_7
KRT16	1.22576e-91	2.09034	1	0.527	2.21262e-87	seurat_exp_7
SFN	1.57871e-91	1.84876	1	0.509	2.84973e-87	seurat_exp_7
KRT6B	2.03902e-90	1.7021	1	0.498	3.68064e-86	seurat_exp_7
IGFBP7	1.43874e-87	-1.79163	1	1	2.59708e-83	seurat_exp_7
PKP1	1.23152e-85	2.05762	0.915	0.413	2.22302e-81	seurat_exp_7
TP63	1.58789e-85	1.99486	0.697	0.208	2.8663e-81	seurat_exp_7
FXYD3	3.07685e-85	1.60209	0.991	0.493	5.55403e-81	seurat_exp_7
KRT9	2.48217e-82	1.32763	0.838	0.319	4.48057e-78	seurat_exp_7
KRT6C	1.01005e-81	2.05209	0.624	0.161	1.82324e-77	seurat_exp_7
DSC1	1.13849e-81	1.2169	0.598	0.127	2.05509e-77	seurat_exp_7
JUP	1.69628e-81	1.80298	1	0.563	3.06195e-77	seurat_exp_7
KLF5	4.607e-81	1.7063	0.718	0.226	8.31609e-77	seurat_exp_7
CRYAB	4.68181e-81	-1.43038	1	1	8.45113e-77	seurat_exp_7
TNS4	1.12396e-80	1.47089	0.705	0.211	2.02886e-76	seurat_exp_7
AHNAK	1.40778e-80	1.10361	1	1	2.54119e-76	seurat_exp_7
HSPB1	1.25446e-79	1.3381	1	1	2.26442e-75	seurat_exp_7
PLA2G4F	1.67281e-79	1.2246	0.5	0.098	3.01959e-75	seurat_exp_7
PIK3C2G	2.43249e-79	1.06204	0.453	0.081	4.39089e-75	seurat_exp_7
KRTDAP	1.40654e-78	1.17741	1	0.518	2.53894e-74	seurat_exp_7
S100A1	2.37012e-78	-1.65689	1	0.999	4.2783e-74	seurat_exp_7
FGFR2	1.29758e-77	1.78309	0.688	0.246	2.34226e-73	seurat_exp_7
ATP1B3	3.39484e-77	1.38147	1	0.9	6.12803e-73	seurat_exp_7
TNC	1.50146e-76	-1.40663	1	1	2.71028e-72	seurat_exp_7
MLANA	2.41443e-75	-2.08969	1	1	4.3583e-71	seurat_exp_7
S100B	3.75925e-75	-1.69123	1	0.999	6.78582e-71	seurat_exp_7
SNCA	4.93274e-75	-1.54171	1	1	8.90409e-71	seurat_exp_7
PTTG1IP	1.26789e-74	-1.3687	1	1	2.28867e-70	seurat_exp_7
DDR1	1.78667e-74	1.25191	0.705	0.221	3.22512e-70	seurat_exp_7
MAF	4.4821e-74	1.58472	1	0.911	8.09063e-70	seurat_exp_7
CRABP2	2.77086e-73	1.30543	1	0.58	5.00167e-69	seurat_exp_7
AQP3	1.61227e-72	1.92042	0.709	0.258	2.9103e-68	seurat_exp_7
SCD	8.29662e-72	-1.18108	1	1	1.49762e-67	seurat_exp_7
THSD4	1.98195e-71	1.11806	0.628	0.178	3.57762e-67	seurat_exp_7
S100A16	3.26991e-71	1.3663	1	0.595	5.90252e-67	seurat_exp_7
TYR	1.26775e-70	-1.30359	1	0.999	2.28841e-66	seurat_exp_7
ST3GAL4	1.31968e-70	-1.16216	1	0.999	2.38216e-66	seurat_exp_7
COL7A1	1.89445e-70	1.9309	0.714	0.299	3.41967e-66	seurat_exp_7
GJA1	2.40378e-70	1.72024	1	0.608	4.33906e-66	seurat_exp_7
FXYD5	4.36958e-70	-1.5376	1	1	7.88753e-66	seurat_exp_7
EGFR	4.75486e-70	1.32414	0.718	0.234	8.583e-66	seurat_exp_7
MIA	1.88044e-69	-1.13443	1	0.999	3.39438e-65	seurat_exp_7
LGALS1	5.86531e-69	-1.02371	1	1	1.05875e-64	seurat_exp_7
TIMP2	8.8554e-69	-1.00648	1	1	1.59849e-64	seurat_exp_7
ALDH3A2	9.8634e-69	1.26387	0.996	0.643	1.78044e-64	seurat_exp_7
PLCB4	1.04749e-68	-1.1742	1	0.998	1.89082e-64	seurat_exp_7
MARCKSL1	1.05359e-68	-1.24345	1	1	1.90184e-64	seurat_exp_7
ZFP36L2	1.34996e-67	1.21015	1	0.955	2.43682e-63	seurat_exp_7
PTPRJ	3.85132e-67	-1.00805	1	0.999	6.95202e-63	seurat_exp_7
TFAP2C	5.22401e-67	1.10473	0.543	0.142	9.42986e-63	seurat_exp_7
HMCN1	5.31085e-67	-1.02	1	0.999	9.58661e-63	seurat_exp_7
COL2A1	5.81662e-67	-1.1279	1	0.997	1.04996e-62	seurat_exp_7
KLF4	5.83647e-67	1.26539	1	0.674	1.05354e-62	seurat_exp_7
SOX10	7.90321e-67	-1.02392	1	0.999	1.42661e-62	seurat_exp_7
PRAME	9.17862e-67	-1.18141	1	0.999	1.65683e-62	seurat_exp_7
PAX3	3.41278e-66	-1.06847	1	0.999	6.16041e-62	seurat_exp_7
TXNIP	1.08928e-65	1.08808	1	0.861	1.96625e-61	seurat_exp_7
STXBP6	1.79518e-65	-1.17496	1	0.999	3.24048e-61	seurat_exp_7
DUSP1	1.81655e-65	1.32033	1	0.706	3.27906e-61	seurat_exp_7
CSGALNACT1	2.68469e-65	-1.07585	1	0.999	4.84614e-61	seurat_exp_7
EDNRB	9.83344e-65	-1.03843	1	0.999	1.77503e-60	seurat_exp_7
EVPL	3.03191e-64	1.35448	0.662	0.22	5.4729e-60	seurat_exp_7
FAT2	4.24145e-64	1.5906	0.675	0.258	7.65623e-60	seurat_exp_7
BEST1	1.00066e-63	-1.02302	1	0.999	1.8063e-59	seurat_exp_7
PRKG2	5.3207e-63	-1.02113	1	0.994	9.60439e-59	seurat_exp_7
ZBTB10	6.97486e-63	-1.04446	1	0.997	1.25903e-58	seurat_exp_7
IMPA2	1.61537e-62	1.44935	0.996	0.648	2.91591e-58	seurat_exp_7
METTL9	4.24492e-62	-1.11065	1	1	7.66251e-58	seurat_exp_7
SOX6	4.7064e-62	-1.01392	1	0.997	8.49553e-58	seurat_exp_7
NDRG4	1.08531e-61	1.2468	0.504	0.134	1.9591e-57	seurat_exp_7
YBX3	1.18142e-61	1.01591	1	1	2.13258e-57	seurat_exp_7
APP	3.63373e-61	-1.00288	1	1	6.55925e-57	seurat_exp_7
PNRC1	5.41617e-61	1.0815	1	0.929	9.77673e-57	seurat_exp_7
GLI3	5.88168e-61	1.21516	1	0.752	1.0617e-56	seurat_exp_7
PKP3	9.60426e-61	1.28788	0.62	0.196	1.73366e-56	seurat_exp_7
CDHR1	1.24582e-59	1.79507	0.56	0.193	2.24884e-55	seurat_exp_7
C19orf33	1.70496e-59	1.48977	0.812	0.427	3.07762e-55	seurat_exp_7
LAD1	1.85471e-59	1.53095	0.607	0.199	3.34793e-55	seurat_exp_7
CLCA2	1.93969e-59	1.49225	0.765	0.349	3.50133e-55	seurat_exp_7
PLP1	6.02263e-59	-1.19155	1	0.999	1.08714e-54	seurat_exp_7
NECTIN1	1.56795e-58	1.36731	1	0.715	2.83031e-54	seurat_exp_7
TBC1D16	4.36656e-58	-1.06348	1	0.999	7.88207e-54	seurat_exp_7
LTB4R	4.4801e-58	1.54552	0.645	0.259	8.08702e-54	seurat_exp_7
TP53AIP1	5.71798e-58	1.16241	0.491	0.138	1.03215e-53	seurat_exp_7
CA12	8.06382e-58	1.48602	0.62	0.227	1.4556e-53	seurat_exp_7
PPP1R13L	7.9247e-57	1.24886	0.662	0.244	1.43049e-52	seurat_exp_7
JUNB	1.29403e-56	1.23243	1	0.735	2.33585e-52	seurat_exp_7
SDC1	2.54937e-56	1.07251	1	0.592	4.60188e-52	seurat_exp_7
RAMP1	3.6419e-56	-1.00818	1	0.996	6.57399e-52	seurat_exp_7
EHF	4.55113e-55	1.26288	0.547	0.172	8.21525e-51	seurat_exp_7
IFFO2	1.07754e-54	1.15063	1	0.658	1.94507e-50	seurat_exp_7
MBP	1.283e-54	-1.14718	1	1	2.31595e-50	seurat_exp_7
EPHB6	1.28333e-54	1.07762	0.521	0.155	2.31654e-50	seurat_exp_7
NFIX	3.26376e-54	1.02904	1	0.757	5.89142e-50	seurat_exp_7
BTG1	3.57112e-54	1.1093	1	0.895	6.44623e-50	seurat_exp_7
NDRG1	3.96292e-54	1.18371	1	0.917	7.15346e-50	seurat_exp_7
PALLD	4.02852e-53	1.14535	1	0.645	7.27188e-49	seurat_exp_7
SLC2A1	2.15944e-52	1.68672	0.761	0.434	3.898e-48	seurat_exp_7
IL20RB	2.43247e-52	1.1303	0.543	0.174	4.39084e-48	seurat_exp_7
SH3RF2	7.57695e-52	1.25793	0.547	0.18	1.36772e-47	seurat_exp_7
DUSP7	1.47187e-51	1.00045	0.991	0.693	2.65688e-47	seurat_exp_7
S100A14	5.93527e-51	1.32569	0.718	0.343	1.07137e-46	seurat_exp_7
MAFB	8.44494e-51	1.14538	1	0.722	1.5244e-46	seurat_exp_7
DEGS1	2.26773e-50	1.39342	1	0.876	4.09348e-46	seurat_exp_7
ZNF750	2.45234e-50	1.03579	0.509	0.15	4.42672e-46	seurat_exp_7
ARL4C	1.11925e-49	1.08363	0.953	0.666	2.02036e-45	seurat_exp_7
SPINT2	2.25182e-49	1.42156	0.774	0.467	4.06477e-45	seurat_exp_7
PDCD4	2.87955e-49	1.00955	1	0.931	5.19788e-45	seurat_exp_7
SOX7	6.07761e-48	1.19869	0.564	0.214	1.09707e-43	seurat_exp_7
EFS	7.40808e-48	1.01239	0.547	0.198	1.33723e-43	seurat_exp_7
LYPD3	1.51605e-46	1.02915	0.62	0.226	2.73662e-42	seurat_exp_7
ALDH2	4.01105e-46	1.38832	0.637	0.305	7.24034e-42	seurat_exp_7
LRATD1	7.8582e-45	1.2527	0.611	0.255	1.41848e-40	seurat_exp_7
NOTCH3	7.75768e-44	1.04255	1	0.722	1.40034e-39	seurat_exp_7
KCNMA1	9.55399e-44	-1.06274	1	0.993	1.72459e-39	seurat_exp_7
DSC2	1.52577e-43	1.11989	0.62	0.277	2.75418e-39	seurat_exp_7
SLC25A4	7.67401e-43	-1.10792	1	0.998	1.38524e-38	seurat_exp_7
ALDH3B2	5.31948e-42	1.14789	0.521	0.181	9.6022e-38	seurat_exp_7
EGR1	6.03505e-42	1.22646	0.97	0.646	1.08939e-37	seurat_exp_7
CLU	6.4964e-42	1.11781	0.697	0.312	1.17266e-37	seurat_exp_7
DSG3	1.81045e-41	1.02652	0.671	0.324	3.26805e-37	seurat_exp_7
BNIPL	2.93741e-41	1.05337	0.53	0.196	5.30232e-37	seurat_exp_7
BOC	2.69633e-39	1.0182	0.551	0.229	4.86715e-35	seurat_exp_7
FAM83B	1.01065e-37	1.13018	0.526	0.214	1.82432e-33	seurat_exp_7
RAB3D	1.44664e-37	1.04048	0.833	0.59	2.61132e-33	seurat_exp_7
FOSB	2.29871e-37	1.23131	0.739	0.405	4.14941e-33	seurat_exp_7
FGFR3	1.29196e-35	1.58962	0.697	0.499	2.33211e-31	seurat_exp_7
TF	6.54131e-35	-1.06718	0.996	0.987	1.18077e-30	seurat_exp_7
ABLIM1	1.31252e-33	1.00611	0.547	0.249	2.36923e-29	seurat_exp_7
RAPGEFL1	1.39636e-33	1.07598	0.726	0.523	2.52056e-29	seurat_exp_7
GATM	2.70728e-32	1.07626	0.513	0.247	4.88692e-28	seurat_exp_7
SDC2	3.3633e-30	-1.32376	1	0.895	6.07109e-26	seurat_exp_7
CRYBG1	1.18121e-29	1.03159	0.615	0.372	2.1322e-25	seurat_exp_7
BCL11A	1.45236e-28	1.20679	0.624	0.459	2.62166e-24	seurat_exp_7
SYTL1	8.84673e-28	1.08079	0.534	0.292	1.59692e-23	seurat_exp_7
GPNMB	5.06192e-26	-1.04058	1	1	9.13727e-22	seurat_exp_7
CLEC2B	1.06115e-25	1.0591	0.543	0.322	1.91549e-21	seurat_exp_7
LOR	3.49876e-25	-1.03185	0.577	0.275	6.31561e-21	seurat_exp_7
ZNF385A	4.7906e-24	1.0302	0.658	0.512	8.6475e-20	seurat_exp_7
IFI27L2	1.063e-22	-1.39415	1	0.917	1.91882e-18	seurat_exp_7
RLN2	1.71654e-22	-1.03143	0.137	0.466	3.09852e-18	seurat_exp_7
NRCAM	1.73905e-17	-1.03547	0.996	0.922	3.13915e-13	seurat_exp_7
PMP2	7.62307e-17	-1.11941	0.171	0.445	1.37604e-12	seurat_exp_7
MZB1	5.39222e-16	-1.10442	0.179	0.461	9.73351e-12	seurat_exp_7
PRDM7	7.82428e-16	-1.42596	0.047	0.291	1.41236e-11	seurat_exp_7
SPRR2G	1.83566e-13	-1.78998	0.65	0.378	3.31354e-09	seurat_exp_7
PCSK2	7.83929e-12	-1.53307	0.996	0.855	1.41507e-07	seurat_exp_7
CDH12	5.49224e-10	-1.11036	0.038	0.204	9.91404e-06	seurat_exp_7
COL11A1	4.39609e-151	2.05234	0.853	0.194	7.93539e-147	seurat_exp_8
COL12A1	1.37551e-138	2.76417	0.991	0.552	2.48294e-134	seurat_exp_8
LUM	4.96452e-127	2.76448	1	0.694	8.96146e-123	seurat_exp_8
THBS1	7.17646e-126	2.78576	1	0.726	1.29542e-121	seurat_exp_8
CPXM2	2.45193e-122	1.81363	0.849	0.237	4.42597e-118	seurat_exp_8
SPARC	4.15548e-118	2.03847	1	1	7.50106e-114	seurat_exp_8
COL5A2	4.2777e-118	2.01491	1	0.723	7.72167e-114	seurat_exp_8
COL1A2	3.03786e-116	2.7906	1	0.856	5.48364e-112	seurat_exp_8
COL1A1	4.66588e-116	2.94429	1	0.901	8.42239e-112	seurat_exp_8
HTRA1	8.915e-115	1.98063	0.996	0.667	1.60925e-110	seurat_exp_8
ITGBL1	9.09895e-115	1.43219	0.707	0.15	1.64245e-110	seurat_exp_8
GREM1	1.28779e-113	1.23741	0.64	0.117	2.3246e-109	seurat_exp_8
THBS2	4.53382e-113	2.06473	0.991	0.566	8.184e-109	seurat_exp_8
BGN	5.46616e-113	1.98001	1	0.852	9.86697e-109	seurat_exp_8
COL5A1	1.04586e-112	2.02617	1	0.706	1.88789e-108	seurat_exp_8
CCN2	1.52154e-112	2.41255	0.987	0.68	2.74652e-108	seurat_exp_8
COL14A1	1.2174e-111	1.9984	1	0.63	2.19753e-107	seurat_exp_8
POSTN	2.99317e-110	2.17983	1	0.735	5.40297e-106	seurat_exp_8
LRRC15	5.43162e-109	1.48384	0.716	0.176	9.80462e-105	seurat_exp_8
COL3A1	1.06737e-108	2.42668	1	0.93	1.92671e-104	seurat_exp_8
TMEM119	1.00841e-107	1.34762	0.756	0.191	1.82028e-103	seurat_exp_8
FN1	1.35715e-107	2.48615	1	0.812	2.44979e-103	seurat_exp_8
PRSS23	1.46172e-107	1.81012	1	0.915	2.63855e-103	seurat_exp_8
CDH11	2.55924e-107	1.99118	0.938	0.496	4.61969e-103	seurat_exp_8
DPT	4.78995e-107	1.44016	0.787	0.199	8.64633e-103	seurat_exp_8
COL6A3	5.72887e-107	2.03968	1	0.763	1.03412e-102	seurat_exp_8
C1S	2.84228e-106	1.86503	1	0.607	5.13061e-102	seurat_exp_8
ITGA11	1.55692e-105	1.09704	0.631	0.121	2.81039e-101	seurat_exp_8
FNDC1	8.26598e-105	1.09289	0.596	0.106	1.49209e-100	seurat_exp_8
IGHG1	2.08044e-104	3.08317	1	0.775	3.7554e-100	seurat_exp_8
PCSK5	1.36463e-103	1.06478	0.582	0.1	2.46329e-99	seurat_exp_8
COMP	2.54731e-103	2.28114	1	0.542	4.59815e-99	seurat_exp_8
FBLN2	6.61e-102	1.76199	0.996	0.555	1.19317e-97	seurat_exp_8
COL6A2	7.58154e-102	1.89712	1	0.829	1.36854e-97	seurat_exp_8
CCN1	1.1014e-101	1.92656	0.996	0.773	1.98814e-97	seurat_exp_8
AEBP1	1.1463e-101	1.51764	1	0.992	2.06919e-97	seurat_exp_8
VCAN	3.96094e-100	1.73103	0.991	0.581	7.14989e-96	seurat_exp_8
COL6A1	4.16953e-100	1.74148	1	0.932	7.52642e-96	seurat_exp_8
MMP2	4.84123e-99	1.86224	1	0.726	8.7389e-95	seurat_exp_8
PCOLCE	4.73571e-98	1.62885	0.969	0.546	8.54842e-94	seurat_exp_8
SFRP2	5.399e-97	1.77225	0.964	0.439	9.74573e-93	seurat_exp_8
TPM1	7.65352e-97	1.71525	1	0.797	1.38154e-92	seurat_exp_8
LOXL1	3.52323e-96	1.47893	0.844	0.308	6.35979e-92	seurat_exp_8
C1R	3.22063e-95	1.70546	1	0.659	5.81355e-91	seurat_exp_8
IGKC	4.55994e-95	3.04491	1	0.901	8.23114e-91	seurat_exp_8
B2M	4.80121e-95	1.26046	1	0.999	8.66666e-91	seurat_exp_8
MYH11	6.34094e-95	1.91439	0.689	0.17	1.1446e-90	seurat_exp_8
SLC5A3	1.25949e-94	1.48783	0.987	0.801	2.27351e-90	seurat_exp_8
FBN1	1.33303e-94	1.69522	0.991	0.581	2.40625e-90	seurat_exp_8
LTBP2	2.87206e-94	1.74297	0.853	0.347	5.18435e-90	seurat_exp_8
THY1	1.86976e-93	1.59234	1	0.758	3.37511e-89	seurat_exp_8
DES	2.02353e-91	1.84788	0.551	0.103	3.65267e-87	seurat_exp_8
CTSK	5.14442e-91	1.56287	0.996	0.588	9.28619e-87	seurat_exp_8
IGHA1	9.87088e-91	2.69299	1	0.723	1.78179e-86	seurat_exp_8
STMN2	1.38424e-88	1.26969	0.702	0.188	2.49868e-84	seurat_exp_8
ANTXR1	3.13241e-88	1.52479	0.987	0.634	5.65431e-84	seurat_exp_8
FBLN5	7.20311e-88	1.37699	0.76	0.23	1.30023e-83	seurat_exp_8
VGLL3	1.48422e-87	1.25413	0.747	0.222	2.67916e-83	seurat_exp_8
EDIL3	3.08385e-87	1.24879	0.698	0.198	5.56666e-83	seurat_exp_8
IGLC1	2.51709e-86	2.85485	0.973	0.645	4.5436e-82	seurat_exp_8
TAGLN	2.7751e-86	2.22246	0.996	0.835	5.00934e-82	seurat_exp_8
CALD1	4.2255e-86	1.60369	1	0.945	7.62745e-82	seurat_exp_8
FSTL1	4.61781e-86	1.41667	1	0.818	8.33561e-82	seurat_exp_8
DMKN	7.99381e-86	-1.6284	0.996	1	1.44296e-81	seurat_exp_8
IGFBP4	2.31623e-85	1.65959	1	0.737	4.18102e-81	seurat_exp_8
DCN	3.08341e-85	1.67706	1	0.659	5.56586e-81	seurat_exp_8
COL8A2	1.35185e-84	1.22666	0.671	0.187	2.44023e-80	seurat_exp_8
S100A4	4.73461e-84	1.63525	0.991	0.713	8.54645e-80	seurat_exp_8
ASPN	8.94146e-84	1.21456	0.676	0.194	1.61402e-79	seurat_exp_8
SMOC2	2.61397e-83	1.05436	0.582	0.13	4.71848e-79	seurat_exp_8
PDGFRB	4.78543e-83	1.37457	0.982	0.66	8.63818e-79	seurat_exp_8
ELN	4.30689e-82	1.25543	0.662	0.17	7.77437e-78	seurat_exp_8
MARCKS	4.74335e-82	1.34746	0.996	0.755	8.56222e-78	seurat_exp_8
CCDC80	9.38447e-82	1.36979	0.911	0.372	1.69399e-77	seurat_exp_8
PODN	1.42932e-80	1.27733	0.711	0.212	2.58007e-76	seurat_exp_8
PECAM1	1.53668e-80	1.52006	1	0.777	2.77386e-76	seurat_exp_8
CILP2	2.25457e-80	1.13837	0.591	0.144	4.06972e-76	seurat_exp_8
EFEMP1	8.83511e-80	1.26372	0.702	0.208	1.59483e-75	seurat_exp_8
FAP	1.47513e-79	1.09035	0.644	0.178	2.66276e-75	seurat_exp_8
SLIT3	1.76261e-79	1.20391	0.796	0.258	3.18168e-75	seurat_exp_8
TMEM176B	2.63158e-79	1.35764	0.987	0.765	4.75027e-75	seurat_exp_8
MEGF6	3.17957e-79	1.48287	0.893	0.477	5.73945e-75	seurat_exp_8
MXRA8	9.11625e-79	1.31533	1	0.899	1.64557e-74	seurat_exp_8
CD74	2.44611e-78	1.49944	1	0.955	4.41548e-74	seurat_exp_8
EMILIN1	3.24049e-77	1.22918	0.756	0.26	5.8494e-73	seurat_exp_8
MXRA5	4.53113e-77	1.1816	0.711	0.22	8.17914e-73	seurat_exp_8
PIM2	4.76422e-77	1.92335	0.951	0.701	8.59989e-73	seurat_exp_8
MYL9	1.18369e-76	1.72766	1	0.981	2.13668e-72	seurat_exp_8
SERPING1	4.67831e-76	1.28938	0.96	0.642	8.44481e-72	seurat_exp_8
SULF1	4.85572e-76	1.79983	0.698	0.237	8.76507e-72	seurat_exp_8
MFAP4	2.01333e-75	1.13114	0.764	0.236	3.63426e-71	seurat_exp_8
ACTA2	3.49408e-75	2.20762	0.987	0.747	6.30716e-71	seurat_exp_8
OLFML2B	1.60654e-74	1.3651	0.867	0.51	2.89997e-70	seurat_exp_8
CDH3	3.35084e-74	-1.10805	1	0.999	6.0486e-70	seurat_exp_8
XBP1	9.86292e-74	1.83682	1	0.989	1.78036e-69	seurat_exp_8
SELENOM	1.46073e-73	1.32804	0.893	0.535	2.63677e-69	seurat_exp_8
INHBA	2.0737e-73	1.54705	0.8	0.346	3.74324e-69	seurat_exp_8
S100A6	3.42545e-73	1.2549	1	0.815	6.18327e-69	seurat_exp_8
SVEP1	6.44631e-73	1.00207	0.627	0.165	1.16362e-68	seurat_exp_8
TMSB4X	2.5555e-72	1.25158	1	0.995	4.61294e-68	seurat_exp_8
FABP5	5.96767e-72	-1.1035	1	1	1.07722e-67	seurat_exp_8
PRRX1	1.02296e-71	1.21784	0.956	0.599	1.84654e-67	seurat_exp_8
MFAP2	1.2474e-71	1.05222	0.662	0.2	2.25169e-67	seurat_exp_8
STAB1	6.09958e-71	1.25478	0.982	0.779	1.10103e-66	seurat_exp_8
SULF2	7.78091e-71	1.30577	0.88	0.517	1.40453e-66	seurat_exp_8
TIMP1	2.84221e-69	1.28626	1	0.874	5.13047e-65	seurat_exp_8
ECM2	1.58018e-68	1.01979	0.636	0.189	2.85238e-64	seurat_exp_8
TPM2	1.1982e-67	1.58438	0.991	0.939	2.16287e-63	seurat_exp_8
CYBA	1.14199e-66	1.01574	1	0.978	2.06141e-62	seurat_exp_8
IGHM	2.17543e-66	2.3588	0.924	0.599	3.92687e-62	seurat_exp_8
IGFBP5	6.50496e-66	1.27714	0.742	0.27	1.17421e-61	seurat_exp_8
CXCL12	1.2815e-65	1.19047	0.996	0.723	2.31324e-61	seurat_exp_8
NSG1	1.37088e-63	-1.05825	1	0.999	2.47458e-59	seurat_exp_8
SELENOP	2.06621e-63	1.13845	1	0.917	3.72971e-59	seurat_exp_8
FBLN1	4.92601e-63	1.09145	0.933	0.592	8.89195e-59	seurat_exp_8
CRIP1	1.44255e-62	1.29701	0.942	0.638	2.60394e-58	seurat_exp_8
COL4A2	3.29547e-62	1.26725	0.996	0.852	5.94866e-58	seurat_exp_8
GEM	3.36574e-62	1.24173	0.733	0.305	6.07549e-58	seurat_exp_8
EHD2	4.18154e-62	1.18999	0.964	0.667	7.5481e-58	seurat_exp_8
FMOD	4.67854e-62	1.02998	0.711	0.26	8.44522e-58	seurat_exp_8
SOX6	1.75731e-61	-1.05698	1	0.997	3.17212e-57	seurat_exp_8
CD44	5.3742e-61	-1.12629	1	1	9.70097e-57	seurat_exp_8
C3	8.14692e-61	1.15588	0.747	0.271	1.4706e-56	seurat_exp_8
COL16A1	1.02566e-60	1.03976	0.996	0.948	1.85142e-56	seurat_exp_8
DAB2	2.85853e-60	1.06476	0.978	0.798	5.15994e-56	seurat_exp_8
CYBRD1	9.87835e-60	1.0514	0.751	0.294	1.78314e-55	seurat_exp_8
DKK3	1.00474e-59	1.3056	0.733	0.311	1.81366e-55	seurat_exp_8
C1QA	1.40493e-59	1.14297	1	0.974	2.53604e-55	seurat_exp_8
IL32	3.10652e-59	1.36431	0.916	0.648	5.60758e-55	seurat_exp_8
COL4A1	3.47307e-59	1.1799	1	0.873	6.26923e-55	seurat_exp_8
CSRP1	4.62172e-59	1.23564	1	0.994	8.34267e-55	seurat_exp_8
MRC2	4.84472e-59	1.1473	0.871	0.505	8.74521e-55	seurat_exp_8
JCHAIN	3.47442e-58	1.49462	0.924	0.579	6.27168e-54	seurat_exp_8
AQP1	7.61308e-58	1.10487	0.996	0.731	1.37424e-53	seurat_exp_8
PTGDS	1.57205e-57	1.07072	1	0.949	2.83771e-53	seurat_exp_8
MZB1	1.77962e-57	2.02052	0.773	0.419	3.21238e-53	seurat_exp_8
CNN3	2.98965e-57	1.00702	0.996	0.85	5.39662e-53	seurat_exp_8
EDNRB	1.02799e-56	-1.00164	1	0.999	1.85563e-52	seurat_exp_8
KCTD12	1.45725e-56	1.12002	0.991	0.827	2.63048e-52	seurat_exp_8
CAPN3	3.2515e-56	-1.02161	1	0.997	5.86928e-52	seurat_exp_8
ID3	5.85477e-56	1.22573	0.933	0.656	1.05684e-51	seurat_exp_8
PRAME	1.04782e-55	-1.10869	1	0.999	1.89143e-51	seurat_exp_8
CAVIN1	1.17196e-55	1.10276	0.973	0.683	2.1155e-51	seurat_exp_8
PMEPA1	1.89497e-55	1.16596	0.764	0.379	3.4206e-51	seurat_exp_8
NNMT	4.27143e-55	1.13377	0.818	0.512	7.71036e-51	seurat_exp_8
SCD	6.03689e-55	-1.02211	1	1	1.08972e-50	seurat_exp_8
PLP1	6.64095e-55	-1.18008	1	0.999	1.19876e-50	seurat_exp_8
WIPF1	8.84479e-55	1.03752	0.933	0.678	1.59657e-50	seurat_exp_8
C1QC	1.42949e-54	1.11873	1	0.967	2.58038e-50	seurat_exp_8
TENT5C	3.70296e-54	1.41001	0.653	0.257	6.68421e-50	seurat_exp_8
RAMP1	4.97773e-54	-1.02844	1	0.996	8.9853e-50	seurat_exp_8
IGHG3	2.14115e-53	1.87188	0.804	0.501	3.86499e-49	seurat_exp_8
S100A1	8.28902e-53	-1.25989	1	0.999	1.49625e-48	seurat_exp_8
ARHGDIB	1.10199e-52	1.04364	0.996	0.832	1.98921e-48	seurat_exp_8
TBC1D16	1.19368e-52	-1.03888	1	0.999	2.15471e-48	seurat_exp_8
TYR	1.56359e-52	-1.07979	1	0.999	2.82243e-48	seurat_exp_8
COL18A1	1.65991e-52	1.25884	0.991	0.842	2.9963e-48	seurat_exp_8
BTG2	3.01563e-52	1.57238	0.982	0.741	5.44351e-48	seurat_exp_8
PRELP	8.52627e-52	1.09832	0.978	0.908	1.53908e-47	seurat_exp_8
SLC25A4	1.17695e-51	-1.23765	1	0.998	2.12451e-47	seurat_exp_8
MLANA	1.3446e-51	-1.55211	1	1	2.42714e-47	seurat_exp_8
LAPTM5	1.6627e-51	1.20618	0.978	0.824	3.00134e-47	seurat_exp_8
STXBP6	3.34754e-51	-1.02468	1	0.999	6.04265e-47	seurat_exp_8
CD79A	1.01127e-50	1.23001	0.542	0.169	1.82544e-46	seurat_exp_8
MYLK	1.82901e-50	1.2373	0.88	0.64	3.30155e-46	seurat_exp_8
TF	5.63891e-50	-1.22296	0.982	0.988	1.01788e-45	seurat_exp_8
KIAA1217	1.83583e-49	1.05122	0.804	0.479	3.31386e-45	seurat_exp_8
A2M	7.38908e-49	1.12577	0.996	0.873	1.3338e-44	seurat_exp_8
DEPP1	6.95007e-48	1.10172	0.64	0.265	1.25456e-43	seurat_exp_8
IFI44L	2.3019e-47	1.02182	0.924	0.686	4.15516e-43	seurat_exp_8
FLNA	2.46003e-46	1.04569	0.996	0.884	4.44061e-42	seurat_exp_8
GRK3	2.84689e-46	-1.14583	1	0.999	5.13892e-42	seurat_exp_8
SNCA	1.14052e-45	-1.0651	1	1	2.05876e-41	seurat_exp_8
S100B	1.63664e-45	-1.17381	1	0.999	2.9543e-41	seurat_exp_8
CNN1	1.35393e-42	1.13317	0.484	0.159	2.44399e-38	seurat_exp_8
TGFBI	1.66936e-42	1.09107	0.867	0.655	3.01337e-38	seurat_exp_8
POU2AF1	6.11439e-42	1.08899	0.56	0.214	1.10371e-37	seurat_exp_8
KCNMA1	4.97475e-41	-1.05085	1	0.993	8.97991e-37	seurat_exp_8
MGP	1.25978e-40	1.22277	0.76	0.461	2.27404e-36	seurat_exp_8
LYZ	4.79304e-40	1.28225	0.978	0.736	8.65192e-36	seurat_exp_8
ACTG2	4.7398e-39	1.04705	0.418	0.124	8.55582e-35	seurat_exp_8
GMPR	3.47235e-38	-1.0996	0.969	0.917	6.26794e-34	seurat_exp_8
GPNMB	1.63025e-37	-1.19741	1	1	2.94276e-33	seurat_exp_8
DERL3	2.64889e-37	1.38831	0.609	0.298	4.78151e-33	seurat_exp_8
SEL1L3	3.62161e-36	1.13503	0.698	0.455	6.53737e-32	seurat_exp_8
CARMIL1	1.18003e-35	-1.02673	0.973	0.952	2.13008e-31	seurat_exp_8
AZGP1	4.16328e-34	-1.45031	0.116	0.555	7.51514e-30	seurat_exp_8
VWF	5.44239e-34	1.12233	0.787	0.614	9.82405e-30	seurat_exp_8
IFI30	1.67755e-32	1.02477	0.991	0.823	3.02814e-28	seurat_exp_8
CD163	2.72032e-32	1.01276	0.964	0.844	4.91045e-28	seurat_exp_8
SYNPO2	1.69262e-31	1.03897	0.573	0.272	3.05534e-27	seurat_exp_8
ANGPTL7	3.86554e-29	-1.30814	0.782	0.838	6.97768e-25	seurat_exp_8
PDK1	1.53336e-28	1.05118	0.751	0.594	2.76787e-24	seurat_exp_8
CNFN	2.99239e-27	-1.97458	0.053	0.432	5.40157e-23	seurat_exp_8
PI3	1.8079e-24	-3.25583	0.076	0.435	3.26345e-20	seurat_exp_8
SPRR2G	1.06322e-22	-3.24225	0.084	0.418	1.91922e-18	seurat_exp_8
IFI27L2	4.40947e-22	-1.34116	0.987	0.918	7.95953e-18	seurat_exp_8
LOR	1.01093e-20	-3.34615	0.018	0.314	1.82482e-16	seurat_exp_8
KRT9	1.05102e-20	-3.71198	0.062	0.374	1.8972e-16	seurat_exp_8
SBSN	2.4449e-20	-2.69302	0.116	0.423	4.41328e-16	seurat_exp_8
PCSK2	5.58095e-20	-1.65669	0.933	0.86	1.00742e-15	seurat_exp_8
HMOX1	2.24918e-19	1.69346	0.818	0.681	4.05999e-15	seurat_exp_8
DSG1	9.59752e-17	-2.11397	0.16	0.446	1.73245e-12	seurat_exp_8
PKP1	4.01994e-16	-1.5103	0.178	0.466	7.2564e-12	seurat_exp_8
SLPI	3.40792e-15	-2.16187	0.098	0.349	6.15163e-11	seurat_exp_8
PCDH7	5.36791e-14	-1.06286	0.973	0.91	9.68962e-10	seurat_exp_8
SPRR1B	3.04067e-13	-2.78129	0.249	0.472	5.48871e-09	seurat_exp_8
SPRR2E	4.33129e-12	-1.92837	0.004	0.187	7.81841e-08	seurat_exp_8
SERPINB3	3.17775e-11	-1.44496	0.022	0.201	5.73615e-07	seurat_exp_8
CRCT1	2.51924e-10	-1.09143	0.018	0.183	4.54747e-06	seurat_exp_8
KRT6C	3.62948e-10	-1.98093	0.036	0.204	6.55158e-06	seurat_exp_8
KLK8	4.95495e-10	-1.02693	0.04	0.208	8.94418e-06	seurat_exp_8
KLK7	8.69976e-10	-1.25732	0.027	0.186	1.57039e-05	seurat_exp_8
SPRR2A	2.67657e-09	-1.59524	0.013	0.159	4.83147e-05	seurat_exp_8
IVL	3.23443e-09	-1.17977	0.022	0.171	5.83848e-05	seurat_exp_8
SPINK5	3.99867e-09	-1.58708	0.049	0.204	7.218e-05	seurat_exp_8
KLK5	4.41523e-09	-1.42711	0.04	0.194	7.96993e-05	seurat_exp_8
KRT2	1.17205e-08	-2.84687	0.04	0.186	0.000211566	seurat_exp_8
KRT80	1.24619e-08	-1.08932	0.027	0.168	0.00022495	seurat_exp_8
FLG2	1.76256e-08	-2.74103	0.049	0.194	0.00031816	seurat_exp_8
CALML5	2.29992e-08	-3.05068	0.298	0.441	0.000415159	seurat_exp_8
CALML3	4.25541e-08	-1.79781	0.107	0.258	0.000768144	seurat_exp_8
CSTA	7.87635e-08	-2.23573	0.36	0.499	0.00142176	seurat_exp_8
DSC1	9.52025e-08	-1.3965	0.036	0.167	0.0017185	seurat_exp_8
LCE3D	1.21415e-07	-1.23523	0.036	0.167	0.00219166	seurat_exp_8
ASPRV1	1.57899e-07	-1.33262	0.071	0.213	0.00285023	seurat_exp_8
TACSTD2	2.35501e-07	-1.06582	0.324	0.504	0.00425102	seurat_exp_8
CASP14	2.53092e-07	-1.64922	0.053	0.184	0.00456857	seurat_exp_8
HRNR	3.62893e-07	-1.38263	0.067	0.204	0.00655058	seurat_exp_8
RHCG	4.31422e-07	-1.2236	0.053	0.182	0.00778759	seurat_exp_8
SPRR2D	5.94539e-07	-1.58968	0.04	0.161	0.010732	seurat_exp_8
KRT14	6.11589e-07	-1.15991	0.938	0.588	0.0110398	seurat_exp_8
KLK13	7.29059e-07	-1.13649	0.058	0.188	0.0131602	seurat_exp_8
KLK6	7.64519e-07	-1.20254	0.018	0.129	0.0138003	seurat_exp_8
LCN2	8.23122e-07	-1.42245	0.04	0.161	0.0148582	seurat_exp_8
FOSB	1.02283e-06	-1.13545	0.284	0.438	0.0184631	seurat_exp_8
GABRP	9.19034e-232	2.63099	0.943	0.121	1.65895e-227	seurat_exp_9
TFCP2L1	2.72153e-199	2.36201	0.959	0.16	4.91263e-195	seurat_exp_9
PNLIPRP3	2.81458e-197	1.70093	0.839	0.102	5.08059e-193	seurat_exp_9
MMP7	4.05885e-178	2.19486	0.876	0.137	7.32664e-174	seurat_exp_9
LAMB3	5.94184e-177	2.3076	0.979	0.196	1.07256e-172	seurat_exp_9
ITGB8	4.11796e-170	1.9243	0.891	0.15	7.43332e-166	seurat_exp_9
RASSF10	2.07815e-168	2.02532	0.912	0.169	3.75128e-164	seurat_exp_9
ITGB4	3.24261e-159	2.17352	0.964	0.219	5.85323e-155	seurat_exp_9
TNS4	1.2297e-156	2.12754	0.953	0.203	2.21973e-152	seurat_exp_9
THSD4	2.9599e-155	1.82789	0.891	0.168	5.34292e-151	seurat_exp_9
EGFR	2.53613e-154	2.1895	0.969	0.225	4.57797e-150	seurat_exp_9
SOSTDC1	4.38726e-152	1.63659	0.798	0.125	7.91945e-148	seurat_exp_9
SOX9	4.18669e-142	1.78692	0.891	0.194	7.5574e-138	seurat_exp_9
DDR1	6.32999e-130	1.76182	0.917	0.214	1.14263e-125	seurat_exp_9
CD79A	4.1979e-124	1.83459	0.788	0.158	7.57764e-120	seurat_exp_9
DEFB1	4.34756e-122	1.63277	0.839	0.173	7.84779e-118	seurat_exp_9
IRF6	4.65122e-120	1.35617	0.788	0.145	8.39591e-116	seurat_exp_9
IRX4	1.55664e-119	1.18012	0.684	0.107	2.80989e-115	seurat_exp_9
TP63	2.01889e-114	1.59458	0.896	0.202	3.64429e-110	seurat_exp_9
INHBB	6.06586e-114	1.08575	0.684	0.114	1.09495e-109	seurat_exp_9
DSG3	1.25875e-112	1.84552	0.964	0.311	2.27217e-108	seurat_exp_9
BOC	1.75552e-112	1.61285	0.85	0.216	3.16888e-108	seurat_exp_9
GPX2	2.55711e-112	1.14905	0.679	0.115	4.61583e-108	seurat_exp_9
CPA3	2.51321e-111	1.66724	0.876	0.212	4.5366e-107	seurat_exp_9
COL17A1	5.84279e-111	2.45941	1	0.486	1.05468e-106	seurat_exp_9
ATP1B3	3.72787e-106	2.0835	1	0.901	6.72917e-102	seurat_exp_9
FXYD3	1.14313e-105	2.24108	1	0.499	2.06346e-101	seurat_exp_9
EN1	4.28199e-104	1.20465	0.725	0.144	7.72942e-100	seurat_exp_9
FAT2	4.45715e-103	1.50822	0.907	0.25	8.04561e-99	seurat_exp_9
KLF5	9.39008e-102	1.39787	0.891	0.222	1.695e-97	seurat_exp_9
IGHG1	9.53976e-102	3.60698	1	0.777	1.72202e-97	seurat_exp_9
IGKC	1.18551e-101	3.6096	1	0.902	2.13996e-97	seurat_exp_9
SLC38A2	1.26106e-101	1.76266	1	0.997	2.27634e-97	seurat_exp_9
IGLC1	6.53032e-101	3.46275	1	0.646	1.17879e-96	seurat_exp_9
TXNIP	6.74355e-101	1.89907	1	0.863	1.21728e-96	seurat_exp_9
FHL2	7.99893e-100	1.34912	0.86	0.244	1.44389e-95	seurat_exp_9
LRATD1	8.699e-99	1.53866	0.876	0.244	1.57026e-94	seurat_exp_9
KRT14	2.87888e-98	2.44004	1	0.587	5.19667e-94	seurat_exp_9
HS6ST1	3.55466e-97	1.74574	0.969	0.608	6.41652e-93	seurat_exp_9
POU2AF1	4.44248e-97	1.60489	0.777	0.204	8.01912e-93	seurat_exp_9
FGF7	9.68066e-97	1.32769	0.741	0.171	1.74746e-92	seurat_exp_9
DSC3	1.20273e-96	2.09191	0.995	0.485	2.17105e-92	seurat_exp_9
FABP5	3.6021e-96	-1.69853	1	1	6.50216e-92	seurat_exp_9
MZB1	5.81949e-96	2.37337	0.933	0.413	1.05048e-91	seurat_exp_9
NTN4	9.64694e-96	1.34828	0.819	0.224	1.74137e-91	seurat_exp_9
PRICKLE1	1.84545e-94	1.72195	0.927	0.492	3.33121e-90	seurat_exp_9
TENT5C	4.79186e-94	1.82928	0.824	0.251	8.64978e-90	seurat_exp_9
PPP1R13L	1.68318e-93	1.49199	0.86	0.237	3.03831e-89	seurat_exp_9
SFRP1	2.18947e-93	1.25683	0.772	0.181	3.95222e-89	seurat_exp_9
APCDD1	3.94231e-93	1.86369	0.995	0.61	7.11626e-89	seurat_exp_9
S100A2	8.86002e-93	1.34338	0.995	0.533	1.59932e-88	seurat_exp_9
XBP1	3.42109e-92	2.25445	1	0.989	6.17542e-88	seurat_exp_9
COL7A1	8.86542e-92	1.4699	0.907	0.292	1.6003e-87	seurat_exp_9
VSNL1	9.90957e-92	1.18375	0.684	0.141	1.78878e-87	seurat_exp_9
IGHA1	1.53426e-91	3.00848	1	0.726	2.7695e-87	seurat_exp_9
PTGFR	8.24343e-91	1.10051	0.71	0.154	1.48802e-86	seurat_exp_9
CLCA2	3.28064e-90	1.70103	0.943	0.344	5.92189e-86	seurat_exp_9
PDLIM4	4.90326e-89	1.31461	0.756	0.202	8.85088e-85	seurat_exp_9
FMN1	1.05481e-88	-1.59895	0.995	1	1.90404e-84	seurat_exp_9
STXBP6	1.31534e-88	-1.75572	0.99	1	2.37432e-84	seurat_exp_9
NET1	1.98391e-88	1.3882	0.881	0.296	3.58115e-84	seurat_exp_9
TRIM29	5.09115e-88	1.90842	1	0.509	9.19004e-84	seurat_exp_9
C19orf33	7.0315e-88	1.84261	0.948	0.424	1.26926e-83	seurat_exp_9
C12orf75	9.37496e-88	1.91422	0.933	0.504	1.69227e-83	seurat_exp_9
JAG1	9.46773e-87	1.73907	0.969	0.657	1.70902e-82	seurat_exp_9
ZBTB7C	1.91272e-86	1.16961	0.72	0.165	3.45266e-82	seurat_exp_9
SPINT1	3.69721e-86	1.30308	0.803	0.209	6.67384e-82	seurat_exp_9
SCD	6.12273e-86	-1.61862	0.995	1	1.10521e-81	seurat_exp_9
LDLRAD3	8.7164e-86	-1.56332	0.99	0.999	1.5734e-81	seurat_exp_9
GLI3	9.81564e-86	1.56987	1	0.755	1.77182e-81	seurat_exp_9
TNFSF10	1.52211e-85	1.55665	0.974	0.565	2.74756e-81	seurat_exp_9
BEST1	3.13685e-85	-1.52883	0.99	0.999	5.66233e-81	seurat_exp_9
MBP	7.39832e-85	-1.75821	1	1	1.33547e-80	seurat_exp_9
MMP28	8.31924e-85	1.01957	0.637	0.131	1.50171e-80	seurat_exp_9
BIRC7	9.07268e-85	-1.49163	0.99	0.998	1.63771e-80	seurat_exp_9
CA12	9.28497e-85	1.19676	0.824	0.22	1.67603e-80	seurat_exp_9
GABRE	1.14241e-84	1.14538	0.782	0.202	2.06216e-80	seurat_exp_9
PIR	1.19207e-84	-1.38882	0.969	0.997	2.15181e-80	seurat_exp_9
S100B	2.10875e-84	-2.12471	0.99	1	3.8065e-80	seurat_exp_9
IGHM	2.13239e-84	2.76299	0.979	0.599	3.84918e-80	seurat_exp_9
PCMTD1	5.92656e-84	1.2497	1	0.976	1.0698e-79	seurat_exp_9
PTPRJ	6.86244e-84	-1.42879	0.995	0.999	1.23874e-79	seurat_exp_9
DMKN	6.98644e-84	-1.8	0.995	1	1.26112e-79	seurat_exp_9
MLANA	1.83591e-83	-2.40753	0.995	1	3.314e-79	seurat_exp_9
TYR	4.12466e-83	-1.71556	0.995	1	7.44543e-79	seurat_exp_9
PIM2	4.87432e-83	1.9911	0.974	0.702	8.79863e-79	seurat_exp_9
CD109	1.48563e-82	1.28417	0.798	0.239	2.6817e-78	seurat_exp_9
SOX10	1.71184e-82	-1.46143	0.99	1	3.09005e-78	seurat_exp_9
GPR143	2.31505e-82	-1.36444	0.974	0.996	4.17889e-78	seurat_exp_9
PRAME	2.35483e-82	-1.62018	0.99	1	4.25071e-78	seurat_exp_9
KRT5	2.69822e-82	1.66766	1	0.573	4.87056e-78	seurat_exp_9
PRKG2	4.00356e-82	-1.47186	0.974	0.996	7.22683e-78	seurat_exp_9
CASZ1	1.11194e-81	1.23545	0.813	0.228	2.00717e-77	seurat_exp_9
BMPR1B	1.21795e-81	-1.48037	0.979	0.993	2.19852e-77	seurat_exp_9
ST3GAL6	2.2289e-81	-1.29326	0.974	0.994	4.02339e-77	seurat_exp_9
PLP1	4.50166e-81	-1.65817	0.995	0.999	8.12595e-77	seurat_exp_9
STK32A	4.5569e-81	-1.42789	0.984	0.996	8.22566e-77	seurat_exp_9
EDNRB	5.71379e-81	-1.46221	1	0.999	1.0314e-76	seurat_exp_9
PLCB4	7.61325e-81	-1.55334	0.99	0.999	1.37427e-76	seurat_exp_9
POSTN	1.39414e-80	1.65549	1	0.738	2.51657e-76	seurat_exp_9
MITF	1.66929e-80	-1.35063	0.979	0.998	3.01323e-76	seurat_exp_9
PAX3	1.77056e-80	-1.46569	0.99	1	3.19603e-76	seurat_exp_9
CD44	3.22407e-80	-1.59694	1	1	5.81977e-76	seurat_exp_9
RAMP1	5.0111e-80	-1.47979	0.979	0.997	9.04554e-76	seurat_exp_9
P2RX7	1.435e-79	-1.33784	0.979	0.997	2.59033e-75	seurat_exp_9
KCNAB2	1.91591e-79	-1.26887	0.974	0.996	3.45841e-75	seurat_exp_9
ZBTB10	2.61986e-79	-1.46297	0.984	0.998	4.72911e-75	seurat_exp_9
BTG2	2.74426e-79	1.89113	0.984	0.743	4.95367e-75	seurat_exp_9
RUNX1	3.51831e-79	1.44847	0.964	0.673	6.35089e-75	seurat_exp_9
SOX6	5.11652e-79	-1.44458	0.984	0.998	9.23583e-75	seurat_exp_9
PHACTR1	5.56833e-79	-1.35193	0.99	0.999	1.00514e-74	seurat_exp_9
COL2A1	6.11976e-79	-1.47722	0.979	0.998	1.10468e-74	seurat_exp_9
EGLN3	6.32801e-79	-1.20998	0.948	0.991	1.14227e-74	seurat_exp_9
JCHAIN	6.9309e-79	2.09845	0.948	0.581	1.2511e-74	seurat_exp_9
CABLES1	7.55656e-79	-1.26472	0.969	0.995	1.36403e-74	seurat_exp_9
PLA2R1	8.17967e-79	1.09451	0.684	0.167	1.47651e-74	seurat_exp_9
TRPS1	2.04361e-78	1.38329	0.845	0.315	3.68892e-74	seurat_exp_9
MYO5A	5.35413e-78	-1.29299	0.995	1	9.66474e-74	seurat_exp_9
TM4SF1	6.06402e-78	1.51698	0.953	0.632	1.09462e-73	seurat_exp_9
TACSTD2	7.46264e-78	1.30999	0.979	0.463	1.34708e-73	seurat_exp_9
XYLT1	7.59148e-78	-1.27497	0.99	0.999	1.37034e-73	seurat_exp_9
OSMR	1.36047e-77	1.26362	0.834	0.278	2.45578e-73	seurat_exp_9
RASSF3	1.45845e-77	-1.34193	0.99	1	2.63266e-73	seurat_exp_9
B2M	3.48614e-77	1.14568	1	0.999	6.29284e-73	seurat_exp_9
SYBU	4.3513e-77	-1.47711	0.964	0.986	7.85453e-73	seurat_exp_9
SLC5A3	7.27904e-77	1.36462	0.974	0.804	1.31394e-72	seurat_exp_9
NSG1	7.79608e-77	-1.352	0.99	1	1.40727e-72	seurat_exp_9
CSGALNACT1	9.57619e-77	-1.39796	1	0.999	1.7286e-72	seurat_exp_9
LIMD1	1.37257e-76	-1.33119	0.979	0.999	2.47763e-72	seurat_exp_9
INPP4B	3.5207e-76	-1.20326	0.964	0.996	6.35521e-72	seurat_exp_9
DSP	3.65997e-76	1.45562	1	0.537	6.60662e-72	seurat_exp_9
TBC1D16	5.60545e-76	-1.48782	0.99	0.999	1.01184e-71	seurat_exp_9
FHDC1	7.7776e-76	1.35401	0.933	0.66	1.40393e-71	seurat_exp_9
DERL3	7.97009e-76	1.60602	0.788	0.291	1.43868e-71	seurat_exp_9
S100A1	1.18203e-75	-1.81479	0.995	0.999	2.13368e-71	seurat_exp_9
FZD6	1.50435e-75	1.503	0.788	0.277	2.7155e-71	seurat_exp_9
SNCA	1.61704e-75	-1.77195	1	1	2.91892e-71	seurat_exp_9
PYGB	3.59285e-75	1.21053	0.995	0.975	6.48546e-71	seurat_exp_9
MRC2	1.11898e-74	1.43243	0.922	0.506	2.01988e-70	seurat_exp_9
CAPN3	1.53447e-74	-1.37326	0.995	0.997	2.76987e-70	seurat_exp_9
CDK14	2.15311e-74	1.03042	0.699	0.182	3.88658e-70	seurat_exp_9
MAN1A1	2.24843e-74	1.38704	0.87	0.407	4.05864e-70	seurat_exp_9
SERTAD4	2.26917e-74	1.02906	0.637	0.148	4.09608e-70	seurat_exp_9
PMEPA1	2.73979e-74	1.33583	0.876	0.376	4.94559e-70	seurat_exp_9
TEX9	4.41353e-74	1.33733	0.741	0.244	7.96686e-70	seurat_exp_9
CRYL1	5.4488e-74	-1.22259	0.995	0.998	9.83563e-70	seurat_exp_9
AIF1L	6.225e-74	-1.22901	0.984	0.996	1.12367e-69	seurat_exp_9
INHBA	6.5297e-74	1.45834	0.86	0.347	1.17868e-69	seurat_exp_9
SCARB1	6.86336e-74	-1.2223	0.984	0.999	1.2389e-69	seurat_exp_9
FNIP2	1.00928e-73	-1.12574	0.99	0.995	1.82185e-69	seurat_exp_9
RAB38	2.40175e-73	-1.09638	1	0.999	4.33539e-69	seurat_exp_9
SRGAP1	2.98224e-73	-1.19876	1	0.999	5.38324e-69	seurat_exp_9
FGFR2	9.7721e-73	1.13113	0.788	0.246	1.76396e-68	seurat_exp_9
CPEB2	1.48409e-72	-1.02781	0.995	1	2.67893e-68	seurat_exp_9
COMT	2.0461e-72	-1.16773	1	1	3.69342e-68	seurat_exp_9
ZNF704	3.90782e-72	-1.29301	0.979	0.998	7.05401e-68	seurat_exp_9
CDH11	4.42545e-72	1.44753	0.917	0.502	7.98839e-68	seurat_exp_9
ANKRD28	5.9902e-72	-1.21414	0.99	1	1.08129e-67	seurat_exp_9
H1FX	6.84716e-72	1.1969	1	0.905	1.23598e-67	seurat_exp_9
NFIX	8.82298e-72	1.23263	0.995	0.76	1.59264e-67	seurat_exp_9
PPFIBP1	1.1428e-71	-1.22453	1	1	2.06287e-67	seurat_exp_9
FCRL5	1.3071e-71	1.21569	0.622	0.155	2.35945e-67	seurat_exp_9
MAPT	1.74712e-71	-1.18139	0.933	0.989	3.15373e-67	seurat_exp_9
AQP3	1.85737e-71	1.0853	0.834	0.257	3.35275e-67	seurat_exp_9
THBS1	2.13761e-71	1.23983	0.984	0.729	3.8586e-67	seurat_exp_9
ALDH3A2	2.81314e-71	1.3882	0.953	0.65	5.07799e-67	seurat_exp_9
FXYD5	7.13833e-71	-1.72826	1	1	1.28854e-66	seurat_exp_9
DLL1	9.88375e-71	1.06881	0.663	0.173	1.78412e-66	seurat_exp_9
WASL	1.40394e-70	-1.14841	0.995	0.999	2.53425e-66	seurat_exp_9
LY6K	1.46771e-70	-1.1267	0.933	0.994	2.64936e-66	seurat_exp_9
GAPDHS	4.37568e-70	-1.32338	0.927	0.977	7.89854e-66	seurat_exp_9
ALX1	4.57221e-70	-1.24548	0.953	0.987	8.2533e-66	seurat_exp_9
METTL9	5.30378e-70	-1.36106	1	1	9.57386e-66	seurat_exp_9
SGCD	8.03204e-70	-1.12667	0.969	0.994	1.44986e-65	seurat_exp_9
NRBP2	9.92954e-70	-1.17867	0.995	0.999	1.79238e-65	seurat_exp_9
KCNK5	1.53678e-69	1.08438	0.637	0.169	2.77405e-65	seurat_exp_9
TRIB2	1.6412e-69	-1.1256	0.99	0.996	2.96253e-65	seurat_exp_9
MSI2	1.7797e-69	-1.17422	1	0.999	3.21254e-65	seurat_exp_9
TNFRSF14	2.12804e-69	-1.11392	0.995	0.999	3.84132e-65	seurat_exp_9
SLC35B2	2.62093e-69	-1.12512	0.995	0.999	4.73104e-65	seurat_exp_9
SLC29A1	2.74837e-69	-1.13881	0.99	0.997	4.96109e-65	seurat_exp_9
PERP	3.56474e-69	1.16458	1	0.512	6.43472e-65	seurat_exp_9
TMEM260	6.74768e-69	-1.16448	0.974	0.996	1.21802e-64	seurat_exp_9
ABTB2	7.02034e-69	-1.08737	0.964	0.995	1.26724e-64	seurat_exp_9
NDUFB9	8.20519e-69	-1.17122	1	1	1.48112e-64	seurat_exp_9
QDPR	1.17846e-68	-1.14918	0.995	0.996	2.12725e-64	seurat_exp_9
ST3GAL4	1.59151e-68	-1.31553	1	0.999	2.87283e-64	seurat_exp_9
RTTN	1.93331e-68	-1.10772	0.984	0.997	3.48982e-64	seurat_exp_9
HSPB2	2.03994e-68	-1.10585	0.953	0.99	3.6823e-64	seurat_exp_9
IL12RB2	4.87307e-68	-1.05647	0.948	0.988	8.79639e-64	seurat_exp_9
MARCKSL1	6.56186e-68	-1.41875	1	1	1.18448e-63	seurat_exp_9
ZNF106	1.0732e-67	-1.17501	1	0.999	1.93724e-63	seurat_exp_9
SAMD4A	1.39828e-67	-1.07869	0.964	0.995	2.52404e-63	seurat_exp_9
MIA	1.64738e-67	-1.31705	0.995	0.999	2.97368e-63	seurat_exp_9
FAM207A	1.80614e-67	-1.11107	0.984	0.998	3.26027e-63	seurat_exp_9
LAMA5	1.84279e-67	1.19886	0.995	0.818	3.32642e-63	seurat_exp_9
MYOF	2.43484e-67	1.36261	0.943	0.653	4.39513e-63	seurat_exp_9
MYO10	7.88804e-67	-1.0634	0.995	1	1.42387e-62	seurat_exp_9
RHOV	9.77539e-67	1.05777	0.674	0.178	1.76456e-62	seurat_exp_9
CHKA	1.47388e-66	-1.00943	0.938	0.993	2.6605e-62	seurat_exp_9
COL12A1	1.61878e-66	1.32889	0.933	0.56	2.92206e-62	seurat_exp_9
KCNMA1	2.7705e-66	-1.4971	0.99	0.994	5.00103e-62	seurat_exp_9
TIMP2	4.2351e-66	-1.10557	1	1	7.64477e-62	seurat_exp_9
SDC1	6.25432e-66	1.28303	0.959	0.599	1.12897e-61	seurat_exp_9
MFAP4	8.69518e-66	1.06903	0.782	0.24	1.56957e-61	seurat_exp_9
AHR	8.7325e-66	1.24106	0.99	0.749	1.5763e-61	seurat_exp_9
ZFP36L1	1.07734e-65	1.26102	1	0.946	1.94471e-61	seurat_exp_9
PTTG1IP	1.796e-65	-1.41852	1	1	3.24197e-61	seurat_exp_9
SLC25A4	5.10456e-65	-1.45527	0.99	0.999	9.21425e-61	seurat_exp_9
FAM174B	5.27747e-65	-1.06031	0.979	0.993	9.52637e-61	seurat_exp_9
WDFY1	7.69281e-65	-1.02392	1	0.999	1.38863e-60	seurat_exp_9
SPON1	7.75612e-65	1.01828	0.674	0.191	1.40006e-60	seurat_exp_9
COL14A1	9.66646e-65	1.30487	0.974	0.635	1.74489e-60	seurat_exp_9
PRKCE	1.76904e-64	-1.01075	0.933	0.99	3.1933e-60	seurat_exp_9
FKBP10	6.19746e-64	-1.06484	1	0.999	1.1187e-59	seurat_exp_9
CAVIN1	1.10672e-63	1.21711	0.984	0.685	1.99775e-59	seurat_exp_9
CHD7	2.03289e-63	-1.03167	0.995	0.999	3.66958e-59	seurat_exp_9
LAX1	2.10014e-63	1.0584	0.585	0.149	3.79097e-59	seurat_exp_9
OSBPL9	2.28717e-63	-1.03696	0.995	0.999	4.12857e-59	seurat_exp_9
HMCN1	2.80183e-63	-1.15949	1	0.999	5.05757e-59	seurat_exp_9
LGI3	3.23261e-63	-1.15896	0.922	0.974	5.83519e-59	seurat_exp_9
FBLN2	4.98055e-63	1.15296	0.984	0.56	8.99039e-59	seurat_exp_9
TPD52L1	5.75569e-63	1.13065	0.71	0.23	1.03896e-58	seurat_exp_9
FOXC1	6.14292e-63	1.24353	0.896	0.704	1.10886e-58	seurat_exp_9
LUM	7.24541e-63	1.24571	1	0.697	1.30787e-58	seurat_exp_9
SSR4	1.51734e-62	1.32172	1	0.976	2.73895e-58	seurat_exp_9
SLC1A5	1.9239e-62	1.11812	0.969	0.887	3.47283e-58	seurat_exp_9
DIPK1B	2.15893e-62	-1.00429	0.969	0.994	3.89708e-58	seurat_exp_9
CYC1	2.47248e-62	-1.02995	1	1	4.46307e-58	seurat_exp_9
TRIM63	3.6013e-62	-1.01713	0.902	0.98	6.50071e-58	seurat_exp_9
BTBD10	4.15714e-62	-1.0248	0.943	0.995	7.50405e-58	seurat_exp_9
ST8SIA1	4.57962e-62	-1.16138	0.979	0.992	8.26668e-58	seurat_exp_9
GDPD5	5.31085e-62	-1.0689	0.902	0.978	9.58661e-58	seurat_exp_9
MARCKS	1.08138e-61	1.10982	1	0.757	1.95199e-57	seurat_exp_9
CAV2	1.49159e-61	1.35794	0.907	0.624	2.69247e-57	seurat_exp_9
LTB4R	2.73549e-61	1.00735	0.772	0.256	4.93783e-57	seurat_exp_9
IFFO2	3.13709e-61	1.27872	0.969	0.664	5.66277e-57	seurat_exp_9
CRYAB	5.08139e-61	-1.35257	0.995	1	9.17243e-57	seurat_exp_9
ASAP1	5.5968e-61	-1.06394	1	0.999	1.01028e-56	seurat_exp_9
BASP1	6.6016e-61	1.18293	0.839	0.376	1.19165e-56	seurat_exp_9
IGFBP7	6.98461e-61	-1.52871	1	1	1.26079e-56	seurat_exp_9
VAV3	9.37463e-61	1.06452	0.71	0.226	1.69221e-56	seurat_exp_9
GRK3	1.04656e-60	-1.38098	0.995	0.999	1.88915e-56	seurat_exp_9
ADCY2	3.50105e-60	-1.06068	0.839	0.945	6.31974e-56	seurat_exp_9
ANKS1B	3.57529e-60	-1.01885	0.839	0.965	6.45375e-56	seurat_exp_9
PAM	3.84166e-60	1.07589	0.979	0.826	6.93457e-56	seurat_exp_9
LBH	3.93334e-60	1.20476	0.995	0.825	7.10008e-56	seurat_exp_9
PECAM1	5.99943e-60	1.28259	1	0.779	1.08296e-55	seurat_exp_9
TRIM22	6.56816e-60	1.17763	0.902	0.629	1.18562e-55	seurat_exp_9
SELENOM	6.58318e-60	1.13334	0.907	0.538	1.18833e-55	seurat_exp_9
PTPN14	6.71294e-60	1.21991	0.902	0.742	1.21175e-55	seurat_exp_9
SCPEP1	1.24275e-59	1.22314	0.933	0.769	2.24329e-55	seurat_exp_9
CDH3	1.49017e-59	-1.0873	0.99	1	2.68991e-55	seurat_exp_9
BCL11B	2.20431e-59	1.03978	0.72	0.238	3.979e-55	seurat_exp_9
NOTCH1	2.26056e-59	1.16066	0.953	0.772	4.08054e-55	seurat_exp_9
PDCD4	4.43523e-59	1.04744	0.995	0.933	8.00603e-55	seurat_exp_9
EHD2	1.10826e-58	1.1204	0.969	0.67	2.00051e-54	seurat_exp_9
CORO2B	1.23354e-58	-1.20781	0.969	0.983	2.22666e-54	seurat_exp_9
FILIP1L	1.9584e-58	1.34847	0.834	0.449	3.53511e-54	seurat_exp_9
ARID5B	3.03453e-58	1.1564	0.917	0.596	5.47763e-54	seurat_exp_9
GDF11	3.90178e-58	-1.07694	0.912	0.983	7.04311e-54	seurat_exp_9
SULF2	1.79557e-57	1.1815	0.876	0.521	3.24118e-53	seurat_exp_9
GPNMB	1.91359e-57	-1.50804	1	1	3.45421e-53	seurat_exp_9
SESN3	3.07909e-57	1.20227	0.969	0.888	5.55807e-53	seurat_exp_9
COL5A2	3.18425e-57	1.11976	0.974	0.727	5.7479e-53	seurat_exp_9
SYNGR1	1.32829e-56	-1.0066	0.974	0.994	2.3977e-52	seurat_exp_9
SPINT2	1.39728e-56	1.16981	0.876	0.465	2.52223e-52	seurat_exp_9
CPXM2	2.01555e-56	1.04148	0.725	0.25	3.63827e-52	seurat_exp_9
IRX2	3.41565e-56	1.14831	0.689	0.266	6.16558e-52	seurat_exp_9
ANKH	5.01763e-56	1.03674	0.762	0.296	9.05732e-52	seurat_exp_9
TF	6.38339e-56	-1.40216	0.99	0.987	1.15227e-51	seurat_exp_9
HTRA1	1.15742e-55	1.08354	0.938	0.674	2.08926e-51	seurat_exp_9
COL1A2	2.86867e-55	1.18365	1	0.857	5.17824e-51	seurat_exp_9
COL6A1	3.98677e-55	1.13016	1	0.932	7.19652e-51	seurat_exp_9
COL1A1	6.70249e-55	1.16266	1	0.902	1.20987e-50	seurat_exp_9
FBXW7	1.26291e-54	1.15435	1	0.945	2.27967e-50	seurat_exp_9
TMEM97	1.6269e-54	-1.01088	0.938	0.984	2.93672e-50	seurat_exp_9
SEL1L3	2.64603e-54	1.36135	0.803	0.451	4.77635e-50	seurat_exp_9
LPAR6	3.23069e-54	1.10022	0.829	0.403	5.83171e-50	seurat_exp_9
C1R	3.42046e-54	1.09724	0.99	0.663	6.17427e-50	seurat_exp_9
CTSF	3.62668e-54	-1.17253	0.979	0.99	6.54652e-50	seurat_exp_9
PLBD1	4.2511e-54	-1.2243	0.938	0.949	7.67366e-50	seurat_exp_9
RBMS3	1.69904e-53	1.00087	0.72	0.268	3.06693e-49	seurat_exp_9
LRIG1	2.36509e-53	1.18147	0.715	0.29	4.26922e-49	seurat_exp_9
CNN3	3.85206e-53	1.0084	0.979	0.852	6.95335e-49	seurat_exp_9
PTPRK	4.80434e-53	1.04648	0.731	0.285	8.67231e-49	seurat_exp_9
MAST4	6.9299e-53	1.01745	0.788	0.315	1.25092e-48	seurat_exp_9
IFI44L	1.45754e-52	1.25605	0.907	0.689	2.63101e-48	seurat_exp_9
ANTXR1	2.52926e-52	1.06889	0.933	0.64	4.56556e-48	seurat_exp_9
HIST1H1D	7.02502e-52	1.16509	0.829	0.495	1.26809e-47	seurat_exp_9
PDE7A	9.69805e-52	1.05061	0.715	0.307	1.7506e-47	seurat_exp_9
VCAN	1.31325e-51	1.04372	0.948	0.587	2.37056e-47	seurat_exp_9
PRDX2	2.70823e-51	1.03211	0.912	0.619	4.88862e-47	seurat_exp_9
CPEB4	5.67622e-51	1.1643	0.855	0.622	1.02461e-46	seurat_exp_9
COL6A3	6.45856e-51	1.11086	1	0.766	1.16583e-46	seurat_exp_9
NNMT	8.87072e-51	1.13351	0.85	0.513	1.60125e-46	seurat_exp_9
GAB2	3.35122e-50	-1.05102	0.959	0.971	6.04929e-46	seurat_exp_9
PDK1	3.66526e-50	1.41052	0.829	0.591	6.61616e-46	seurat_exp_9
FBXO7	1.53593e-49	-1.02735	0.995	0.999	2.77251e-45	seurat_exp_9
COL3A1	2.37366e-49	1.09066	1	0.93	4.28469e-45	seurat_exp_9
PIK3R1	3.02962e-49	1.03461	0.907	0.785	5.46877e-45	seurat_exp_9
ODF3B	3.24584e-49	1.05659	0.886	0.673	5.85907e-45	seurat_exp_9
TIMP3	9.38897e-49	1.02313	0.995	0.839	1.6948e-44	seurat_exp_9
CDH13	1.04038e-47	1.01911	0.782	0.366	1.87799e-43	seurat_exp_9
SCUBE1	3.0622e-47	-1.20059	0.845	0.903	5.52758e-43	seurat_exp_9
MEGF6	8.38318e-47	1.04101	0.85	0.484	1.51325e-42	seurat_exp_9
MX1	2.5153e-46	1.12618	0.927	0.745	4.54036e-42	seurat_exp_9
CARMIL1	2.93781e-46	-1.2566	0.979	0.952	5.30304e-42	seurat_exp_9
MREG	3.52904e-46	-1.2056	0.917	0.898	6.37028e-42	seurat_exp_9
ELL2	1.23654e-44	1.17198	0.855	0.633	2.23208e-40	seurat_exp_9
PRDM1	1.3646e-44	1.0896	0.71	0.3	2.46323e-40	seurat_exp_9
LTBP2	8.01138e-44	1.05434	0.762	0.358	1.44613e-39	seurat_exp_9
ISG20	2.78155e-42	1.10062	0.751	0.385	5.02098e-38	seurat_exp_9
ITM2C	3.46265e-42	1.01491	1	0.972	6.25044e-38	seurat_exp_9
APOE	4.83061e-42	-1.19471	1	1	8.71974e-38	seurat_exp_9
SDC2	8.41392e-40	-1.645	0.995	0.896	1.5188e-35	seurat_exp_9
IGHG3	1.14131e-39	2.45684	0.767	0.506	2.06018e-35	seurat_exp_9
FAM49B	3.63944e-39	-1.08988	0.938	0.978	6.56955e-35	seurat_exp_9
GMPR	5.26231e-39	-1.1875	0.979	0.917	9.499e-35	seurat_exp_9
IFI27	1.94855e-35	-1.27062	1	0.953	3.51733e-31	seurat_exp_9
IFI27L2	1.70687e-34	-1.66528	1	0.918	3.08108e-30	seurat_exp_9
NRCAM	1.72577e-34	-1.20052	0.964	0.925	3.11519e-30	seurat_exp_9
CRTAC1	3.72602e-34	-1.2121	0.933	0.884	6.72584e-30	seurat_exp_9
ANGPTL7	4.26862e-34	-1.45146	0.813	0.835	7.70529e-30	seurat_exp_9
GULP1	1.12246e-33	-1.03331	0.316	0.749	2.02615e-29	seurat_exp_9
COL11A2	9.59693e-33	-1.09137	0.907	0.89	1.73234e-28	seurat_exp_9
ENTHD1	4.03727e-32	-1.2568	0.098	0.576	7.28768e-28	seurat_exp_9
GPR158	5.69468e-32	-1.06884	0.668	0.841	1.02795e-27	seurat_exp_9
AZGP1	6.45451e-28	-1.40231	0.119	0.55	1.1651e-23	seurat_exp_9
AKAP12	8.49016e-28	-1.06839	0.917	0.932	1.53256e-23	seurat_exp_9
RLN2	9.99569e-26	-1.10538	0.062	0.466	1.80432e-21	seurat_exp_9
PMP2	1.77571e-24	-1.2555	0.057	0.449	3.20533e-20	seurat_exp_9
ACTA1	2.99855e-24	-1.66374	0.85	0.849	5.41267e-20	seurat_exp_9
SPRR2G	2.56692e-23	-3.30958	0.047	0.417	4.63354e-19	seurat_exp_9
FSTL5	7.42726e-23	-1.02882	0.699	0.846	1.34069e-18	seurat_exp_9
SPRR1B	2.55299e-22	-2.96124	0.109	0.478	4.6084e-18	seurat_exp_9
TRIM2	3.62952e-22	-1.02797	0.938	0.936	6.55165e-18	seurat_exp_9
PCSK2	6.1065e-22	-1.67587	0.964	0.859	1.10228e-17	seurat_exp_9
PI3	1.00923e-20	-3.19838	0.078	0.432	1.82176e-16	seurat_exp_9
PCDH7	3.37063e-19	-1.13721	0.99	0.91	6.08432e-15	seurat_exp_9
LOR	7.45661e-16	-3.2848	0.036	0.31	1.34599e-11	seurat_exp_9
KRT9	2.45112e-13	-3.59251	0.109	0.368	4.42452e-09	seurat_exp_9
SBSN	5.2857e-13	-2.49744	0.15	0.418	9.54121e-09	seurat_exp_9
PRDM7	1.56849e-11	-1.31144	0.062	0.287	2.83129e-07	seurat_exp_9
KRT6C	2.53094e-08	-1.96229	0.041	0.202	0.000456861	seurat_exp_9
SPRR2D	3.74019e-08	-1.64013	0.016	0.161	0.000675141	seurat_exp_9
SERPINB3	4.78381e-08	-1.37005	0.041	0.198	0.000863526	seurat_exp_9
CXCL8	6.41185e-08	-1.03934	0.041	0.196	0.0011574	seurat_exp_9
FLG2	6.69516e-08	-2.72193	0.041	0.193	0.00120854	seurat_exp_9
CRCT1	1.61259e-07	-1.07549	0.036	0.18	0.00291089	seurat_exp_9
KRT2	1.71986e-07	-2.84789	0.041	0.184	0.00310452	seurat_exp_9
SPRR2A	1.8232e-07	-1.57404	0.021	0.157	0.00329105	seurat_exp_9
KLK13	2.00602e-07	-1.17883	0.041	0.188	0.00362106	seurat_exp_9
SPRR2E	2.32691e-07	-1.85684	0.041	0.183	0.0042003	seurat_exp_9
LCE1C	1.30056e-06	-1.51928	0.041	0.171	0.0234764	seurat_exp_9
SPINK5	2.41988e-06	-1.55449	0.073	0.202	0.0436813	seurat_exp_9
HAPLN1	4.40317e-144	1.92384	0.943	0.166	7.94816e-140	seurat_exp_10
SLC38A5	7.11867e-95	1.33569	0.887	0.202	1.28499e-90	seurat_exp_10
SPOCK1	9.36275e-95	1.58877	0.95	0.246	1.69007e-90	seurat_exp_10
ANKRD33B	2.13629e-93	1.23418	0.943	0.254	3.85622e-89	seurat_exp_10
PCDH7	1.66308e-88	2.38748	1	0.911	3.00202e-84	seurat_exp_10
CST2	5.63672e-88	2.49188	1	0.742	1.01749e-83	seurat_exp_10
NRCAM	1.41686e-86	2.27511	1	0.924	2.55758e-82	seurat_exp_10
INSC	5.62107e-77	1.64688	0.993	0.753	1.01466e-72	seurat_exp_10
RHOBTB3	6.65982e-70	1.46281	0.993	0.819	1.20216e-65	seurat_exp_10
SH3BP4	5.82883e-63	1.15065	1	0.913	1.05216e-58	seurat_exp_10
CAPG	7.34791e-63	-1.9511	0.674	0.989	1.32637e-58	seurat_exp_10
COL11A2	1.02076e-61	1.50799	1	0.886	1.84257e-57	seurat_exp_10
CPM	1.01741e-59	1.17861	1	0.925	1.83654e-55	seurat_exp_10
MT-ND2	1.6158e-58	-1.27789	1	1	2.91668e-54	seurat_exp_10
GSTP1	2.51354e-55	-1.12746	1	1	4.53719e-51	seurat_exp_10
GULP1	4.56365e-55	1.22871	0.993	0.713	8.23784e-51	seurat_exp_10
LRRN4CL	4.53107e-54	1.15505	0.986	0.741	8.17904e-50	seurat_exp_10
SLC6A17	6.69411e-54	1.09113	0.95	0.506	1.20835e-49	seurat_exp_10
STARD13	9.85532e-54	-1.29029	0.426	0.956	1.77898e-49	seurat_exp_10
IFI16	4.63074e-50	-1.73288	0.695	0.909	8.35895e-46	seurat_exp_10
SORL1	2.87442e-48	-1.34146	0.028	0.71	5.18862e-44	seurat_exp_10
FSTL1	1.44099e-47	-1.93489	0.305	0.853	2.60112e-43	seurat_exp_10
MXRA7	5.82704e-47	-1.24807	0.95	0.997	1.05184e-42	seurat_exp_10
LMNA	3.01924e-41	-1.43532	0.922	0.984	5.45003e-37	seurat_exp_10
CALD1	2.88807e-39	-1.55055	0.78	0.956	5.21325e-35	seurat_exp_10
GSN	1.01829e-38	-1.35282	0.894	0.956	1.83811e-34	seurat_exp_10
MDK	6.99004e-38	-1.19878	0.433	0.883	1.26177e-33	seurat_exp_10
EPS8L2	8.74386e-38	-1.1064	0.177	0.74	1.57835e-33	seurat_exp_10
CAVIN1	3.40775e-36	-1.57087	0.177	0.724	6.15132e-32	seurat_exp_10
RAB34	3.80307e-36	-1.23741	0.206	0.746	6.86492e-32	seurat_exp_10
TPM2	7.30958e-36	-1.33622	0.695	0.953	1.31945e-31	seurat_exp_10
S100A9	1.36202e-35	-4.40708	0.277	0.743	2.45859e-31	seurat_exp_10
DUSP1	2.12497e-35	-2.18249	0.319	0.743	3.83578e-31	seurat_exp_10
KRT5	4.52707e-35	-4.81523	0.05	0.62	8.17182e-31	seurat_exp_10
TMEM54	9.35636e-35	-1.12619	0.106	0.659	1.68892e-30	seurat_exp_10
PTGDS	1.08525e-34	-1.53852	0.794	0.959	1.95899e-30	seurat_exp_10
KRT14	3.62003e-34	-5.40934	0.092	0.632	6.53451e-30	seurat_exp_10
AQP1	6.07834e-34	-1.8516	0.298	0.767	1.0972e-29	seurat_exp_10
KRT6A	1.14669e-33	-3.76025	0.035	0.597	2.0699e-29	seurat_exp_10
S100A8	1.58585e-33	-4.44404	0.057	0.607	2.86261e-29	seurat_exp_10
KRT17	4.50848e-33	-3.88335	0.078	0.62	8.13826e-29	seurat_exp_10
IGFBP4	1.21796e-32	-2.32898	0.348	0.771	2.19854e-28	seurat_exp_10
[truncated: 12,144 more rows]

## Sheet: ORA res
pathway	pval	padj	overlap	size	overlapGenes	cluster
IL_17_signaling_pathway	7.60256e-07	3.04103e-05	7	90	FOS, FOSB, JUN, JUND, LCN2, S100A8, S100A9	seurat_exp_0
Complement_and_coagulation_cascades	0.000947886	0.0189577	4	77	C1R, C3, CLU, CFD	seurat_exp_0
HIF_1_signaling_pathway	0.000281071	0.0112429	9	91	SLC2A1, EGFR, PDK1, HK1, TF, TIMP1, HMOX1, IFNGR2, STAT3	seurat_exp_2
IL_17_signaling_pathway	0.00123419	0.0166523	8	90	FOS, FOSB, JUN, JUND, MAPK12, LCN2, S100A8, S100A9	seurat_exp_2
PI3K_Akt_signaling_pathway	0.00124892	0.0166523	18	342	EGFR, FOXO3, VEGFB, GNB4, ITGB3, ITGB5, COL1A1, COL1A2, COL6A1, COL6A2, COL6A3, COL9A1, COMP, LAMC1, THBS1, THBS2, MCL1, SGK3	seurat_exp_2
IL_17_signaling_pathway	6.29663e-06	0.000251865	8	90	FOS, FOSB, JUN, JUND, CEBPB, LCN2, S100A8, S100A9	seurat_exp_3
Endocrine_resistance	0.000455641	0.00911283	6	90	MMP2, EGFR, JAG1, NOTCH3, JUN, FOS	seurat_exp_3
TNF_signaling_pathway	0.0011914	0.0137808	6	108	CEBPB, JUN, JAG1, SOCS3, FOS, JUNB	seurat_exp_3
PI3K_Akt_signaling_pathway	0.00137808	0.0137808	11	342	EGFR, COL1A1, COL1A2, COL6A1, COL6A2, COL6A3, COMP, FN1, THBS1, THBS2, MCL1	seurat_exp_3
Apoptosis	0.003289	0.026312	6	132	TNFSF10, LMNA, JUN, FOS, CTSK, MCL1	seurat_exp_3
Complement_and_coagulation_cascades	0.00107333	0.0191736	6	77	C1R, C1S, C3, SERPING1, CLU, CFD	seurat_exp_4
TNF_signaling_pathway	0.00124797	0.0191736	7	108	CEBPB, JUN, JAG1, SOCS3, FOS, JUNB, IRF1	seurat_exp_4
PI3K_Akt_signaling_pathway	0.00214246	0.0191736	13	342	EGFR, ITGB5, COL1A1, COL1A2, COL6A1, COL6A2, COL6A3, COMP, FN1, THBS1, THBS2, TNXB, MCL1	seurat_exp_4
Endocrine_resistance	0.0023967	0.0191736	6	90	MMP2, EGFR, PRKACB, JAG1, JUN, FOS	seurat_exp_4
IL_17_signaling_pathway	0.0023967	0.0191736	6	90	FOS, FOSB, JUN, CEBPB, S100A8, S100A9	seurat_exp_4
Apoptosis	0.00389283	0.0259522	7	132	TNFSF10, LMNA, JUN, FOS, CTSK, CTSF, MCL1	seurat_exp_4
cAMP_signaling_pathway	0.000334261	0.00663675	7	194	PRKACB, CALML5, CALML3, PDE4D, FOS, JUN, MYL9	seurat_exp_6
Endocrine_resistance	0.00034748	0.00663675	5	90	PRKACB, JAG1, NOTCH3, JUN, FOS	seurat_exp_6
PI3K_Akt_signaling_pathway	0.000497756	0.00663675	9	342	COL1A1, COL1A2, COL6A2, COL6A3, COL9A1, COMP, SPP1, THBS1, THBS2	seurat_exp_6
IL_17_signaling_pathway	0.0031494	0.031494	4	90	FOS, FOSB, JUN, S100A8	seurat_exp_6
TNF_signaling_pathway	0.00602503	0.0482002	4	108	JUN, JAG1, FOS, JUNB	seurat_exp_6
cGMP_PKG_signaling_pathway	0.000731273	0.0292509	7	162	PRKG2, KCNMA1, EDNRB, PLCB4, ATP1B3, SLC25A4, CALML3	seurat_exp_7
Complement_and_coagulation_cascades	7.33859e-06	0.000293544	8	77	VWF, C1QA, C1QC, C1R, C1S, C3, SERPING1, A2M	seurat_exp_8
PI3K_Akt_signaling_pathway	0.000172508	0.00345015	14	342	PDGFRB, ITGA11, COL1A1, COL1A2, COL4A1, COL4A2, COL6A1, COL6A2, COL6A3, COMP, FN1, THBS1, THBS2, VWF	seurat_exp_8
Fc_gamma_R_mediated_phagocytosis	4.49253e-05	0.00179701	9	85	PIK3R1, PRKCE, VAV3, WASL, ASAP1, MARCKS, MARCKSL1, MYO10, GAB2	seurat_exp_9
PI3K_Akt_signaling_pathway	0.00131618	0.0263236	16	342	PIK3R1, EGFR, FGFR2, LPAR6, FGF7, ITGB4, ITGB8, COL1A1, COL1A2, COL2A1, COL6A1, COL6A3, LAMA5, LAMB3, THBS1, OSMR	seurat_exp_9
PI3K_Akt_signaling_pathway	0.000123886	0.00495543	12	342	EGFR, COL1A1, COL1A2, COL4A2, COL6A1, COL6A2, COL6A3, COMP, SPP1, THBS1, THBS2, TNXB	seurat_exp_10
Endocrine_resistance	0.00178377	0.0237836	5	90	MMP2, EGFR, JAG1, NOTCH3, FOS	seurat_exp_10
IL_17_signaling_pathway	0.00178377	0.0237836	5	90	FOS, FOSB, CEBPB, S100A8, S100A9	seurat_exp_10
TNF_signaling_pathway	0.00393937	0.0393937	5	108	CEBPB, JAG1, SOCS3, FOS, JUNB	seurat_exp_10
Complement_and_coagulation_cascades	0.00653569	0.0498039	4	77	C1R, C1S, CLU, CFD	seurat_exp_10
TGF_beta_signaling_pathway	0.00747059	0.0498039	4	80	THBS1, ID1, ID3, DCN	seurat_exp_10
IL_17_signaling_pathway	4.32472e-08	1.72989e-06	14	90	MAPK13, CEBPB, CXCL1, DEFB4A, MMP9, CXCL8, MMP1, MMP3, LCN2, CXCL6, CXCL5, S100A8, S100A9, IL1B	seurat_exp_12
TNF_signaling_pathway	0.000348972	0.00697943	10	108	MAPK13, CEBPB, CXCL1, CXCL5, IL1B, BCL3, SOCS3, JUNB, MMP3, MMP9	seurat_exp_12
PI3K_Akt_signaling_pathway	0.00228681	0.0304908	18	342	EPHA2, YWHAQ, EREG, AREG, TGFA, PPP2R2C, DDIT4, CDKN1A, ITGA3, ITGB4, ITGB8, COL2A1, COMP, LAMA3, LAMB3, LAMC2, TNXB, OSMR	seurat_exp_12
NOD_like_receptor_signaling_pathway	9.983e-10	3.9932e-08	12	158	AIM2, STAT1, GBP5, GBP2, GBP4, GBP1, BIRC3, CYBB, OAS1, OAS2, OAS3, CCL5	seurat_exp_13
Complement_and_coagulation_cascades	1.03753e-06	2.07506e-05	7	77	PLAT, C1QA, C1QB, C1QC, SERPING1, C2, CFB	seurat_exp_13
Toll_like_receptor_signaling_pathway	6.47409e-05	0.000863211	6	99	CXCL11, CXCL10, CCL5, STAT1, CXCL9, CCL4	seurat_exp_13
Chemokine_signaling_pathway	0.000326283	0.00326283	7	187	CXCL10, CXCL9, CCL4, CCL5, CCL8, CXCL11, STAT1	seurat_exp_13
Cytosolic_DNA_sensing_pathway	0.000651844	0.00521476	4	57	AIM2, CXCL10, CCL4, CCL5	seurat_exp_13
TNF_signaling_pathway	0.000927292	0.00618195	5	108	BIRC3, CCL5, CXCL10, ICAM1, IRF1	seurat_exp_13
IL_17_signaling_pathway	0.000310138	0.0124055	4	90	FOS, FOSB, JUN, JUND	seurat_exp_14
PI3K_Akt_signaling_pathway	0.00142835	0.0285669	6	342	COL4A2, COL6A1, COL6A2, COMP, FN1, NR4A1	seurat_exp_14
MAPK_signaling_pathway	0.00350736	0.0467648	5	283	NR4A1, JUND, JUN, FLNA, FOS	seurat_exp_14
Endocrine_resistance	0.000253129	0.00506258	5	90	MMP2, EGFR, PRKACB, JUN, FOS	seurat_psf_0
IL_17_signaling_pathway	0.000253129	0.00506258	5	90	FOS, FOSB, JUN, S100A8, S100A9	seurat_psf_0
PI3K_Akt_signaling_pathway	1.46808e-05	0.000587233	12	342	EGFR, ITGB4, COL1A1, COL1A2, COL6A1, COL6A2, COL6A3, COMP, FN1, LAMB3, THBS1, THBS2	seurat_psf_1
PI3K_Akt_signaling_pathway	0.000146497	0.00585986	4	342	COL1A1, COL1A2, COMP, TNXB	seurat_psf_2
Complement_and_coagulation_cascades	0.00181921	0.0329945	2	77	CLU, CFD	seurat_psf_2
IL_17_signaling_pathway	0.00247459	0.0329945	2	90	FOS, FOSB	seurat_psf_2
IL_17_signaling_pathway	0.000417131	0.0166852	8	90	FOS, FOSB, JUN, JUND, MAPK12, LCN2, S100A8, S100A9	seurat_psf_3
PI3K_Akt_signaling_pathway	0.000512055	0.00711878	12	342	EGFR, COL1A1, COL1A2, COL6A1, COL6A2, COL6A3, COMP, FN1, THBS1, THBS2, TNXB, MCL1	seurat_psf_4
Endocrine_resistance	0.000533908	0.00711878	6	90	MMP2, EGFR, PRKACB, JAG1, JUN, FOS	seurat_psf_4
IL_17_signaling_pathway	0.000533908	0.00711878	6	90	FOS, FOSB, JUN, CEBPB, S100A8, S100A9	seurat_psf_4
Apoptosis	0.00073906	0.0073906	7	132	TNFSF10, LMNA, JUN, FOS, CTSK, CTSF, MCL1	seurat_psf_4
TNF_signaling_pathway	0.00138911	0.0111129	6	108	CEBPB, JUN, JAG1, SOCS3, FOS, JUNB	seurat_psf_4
NOD_like_receptor_signaling_pathway	1.64336e-08	6.57346e-07	11	158	STAT1, GBP5, GBP2, GBP4, GBP1, BIRC3, CYBB, OAS1, OAS2, OAS3, CCL5	seurat_psf_6
Complement_and_coagulation_cascades	1.21743e-06	2.43487e-05	7	77	C1QA, C1QB, C1QC, SERPING1, A2M, C2, CFB	seurat_psf_6
TNF_signaling_pathway	0.000119779	0.00159706	6	108	BIRC3, CCL5, CXCL10, MMP9, ICAM1, IRF1	seurat_psf_6
Toll_like_receptor_signaling_pathway	0.000696132	0.00666457	5	99	CXCL11, CXCL10, CCL5, STAT1, CXCL9	seurat_psf_6
C_type_lectin_receptor_signaling_pathway	0.000833072	0.00666457	5	103	FCER1G, LSP1, STAT1, IRF1, CALML5	seurat_psf_6
Chemokine_signaling_pathway	0.00217807	0.0145205	6	187	CXCL10, CXCL9, CCL5, CCL8, CXCL11, STAT1	seurat_psf_6
IL_17_signaling_pathway	5.20694e-10	2.08278e-08	14	90	NFKBIA, FOSB, MAPK13, CEBPB, CXCL1, DEFB4A, CXCL8, MMP1, LCN2, PTGS2, CXCL6, S100A8, S100A9, IL1B	seurat_psf_7
TNF_signaling_pathway	0.000118131	0.00236263	9	108	MAPK13, NFKBIA, CEBPB, CXCL1, IL1B, BCL3, SOCS3, JUNB, PTGS2	seurat_psf_7
Complement_and_coagulation_cascades	0.00229532	0.0306042	6	77	SERPINB2, CD55, THBD, PLAUR, F3, ITGAX	seurat_psf_7
IL_17_signaling_pathway	3.03019e-08	1.21208e-06	5	90	FOS, FOSB, JUN, JUND, TRAF3IP2	seurat_psf_8
TNF_signaling_pathway	4.38283e-06	8.76567e-05	4	108	JUN, SOCS3, FOS, JUNB	seurat_psf_8
MAPK_signaling_pathway	0.000190383	0.00253844	4	283	DUSP1, JUND, JUN, FOS	seurat_psf_8
B_cell_receptor_signaling_pathway	0.00236114	0.0234413	2	69	FOS, JUN	seurat_psf_8
Complement_and_coagulation_cascades	0.00293016	0.0234413	2	77	C3, CLU	seurat_psf_8
Endocrine_resistance	0.00397818	0.0239572	2	90	JUN, FOS	seurat_psf_8
T_cell_receptor_signaling_pathway	0.00469759	0.0239572	2	98	FOS, JUN	seurat_psf_8
Toll_like_receptor_signaling_pathway	0.00479144	0.0239572	2	99	FOS, JUN	seurat_psf_8
Apoptosis	0.00836541	0.0371796	2	132	JUN, FOS	seurat_psf_8
Wnt_signaling_pathway	0.00962577	0.0385031	2	142	JUN, SFRP2	seurat_psf_8
IL_17_signaling_pathway	2.96578e-05	0.00118631	8	90	FOS, FOSB, JUN, JUND, CEBPB, LCN2, S100A8, S100A9	spatialGE_exp_1
Complement_and_coagulation_cascades	0.000610439	0.0122088	6	77	C1R, C1S, C3, SERPING1, CLU, CFD	spatialGE_exp_1
Apoptosis	0.00213222	0.0248119	7	132	TNFSF10, LMNA, JUN, FOS, CTSK, CTSF, MCL1	spatialGE_exp_1
PI3K_Akt_signaling_pathway	0.00248119	0.0248119	12	342	EGFR, COL1A1, COL1A2, COL6A1, COL6A2, COL6A3, COMP, FN1, THBS1, THBS2, TNXB, MCL1	spatialGE_exp_1
TNF_signaling_pathway	0.00348616	0.0278893	6	108	CEBPB, JUN, JAG1, SOCS3, FOS, JUNB	spatialGE_exp_1
Endocrine_resistance	0.00750122	0.0448687	5	90	MMP2, EGFR, JAG1, JUN, FOS	spatialGE_exp_1
HIF_1_signaling_pathway	0.00785202	0.0448687	5	91	SLC2A1, EGFR, PDK1, TF, HMOX1	spatialGE_exp_1
IL_17_signaling_pathway	0.000204982	0.00819927	5	90	FOS, FOSB, JUN, S100A8, S100A9	spatialGE_exp_2
IL_17_signaling_pathway	5.22863e-08	2.09145e-06	8	90	FOS, FOSB, JUN, JUND, CXCL8, LCN2, S100A8, S100A9	spatialGE_exp_3
Complement_and_coagulation_cascades	0.00105603	0.0211206	4	77	C1R, C3, CLU, CFD	spatialGE_exp_3
Toll_like_receptor_signaling_pathway	0.00266471	0.0307429	4	99	CXCL8, FOS, JUN, CTSK	spatialGE_exp_3
TNF_signaling_pathway	0.00364565	0.0307429	4	108	JUN, SOCS3, FOS, JUNB	spatialGE_exp_3
PI3K_Akt_signaling_pathway	0.00384286	0.0307429	7	342	COL1A1, COL1A2, COL6A1, COL6A2, COL6A3, COMP, TNXB	spatialGE_exp_3
IL_17_signaling_pathway	0.00281895	0.0367264	2	90	CXCL8, IL1B	spatialGE_exp_4
NF_kappa_B_signaling_pathway	0.00294331	0.0367264	2	92	IL1B, CXCL8	spatialGE_exp_4
Toll_like_receptor_signaling_pathway	0.00339859	0.0367264	2	99	CXCL8, IL1B	spatialGE_exp_4
C_type_lectin_receptor_signaling_pathway	0.00367264	0.0367264	2	103	IL1B, CALML5	spatialGE_exp_4
PI3K_Akt_signaling_pathway	0.000417705	0.00911562	20	342	EGFR, FOXO3, VEGFB, GNB4, ITGB3, ITGB5, COL1A1, COL1A2, COL6A1, COL6A2, COL6A3, COL9A1, COMP, FN1, LAMC1, THBS1, THBS2, TNXB, MCL1, SGK3	spatialGE_exp_5
HIF_1_signaling_pathway	0.000455781	0.00911562	9	91	SLC2A1, EGFR, PDK1, HK1, TF, TIMP1, HMOX1, IFNGR2, STAT3	spatialGE_exp_5
IL_17_signaling_pathway	0.00187455	0.024994	8	90	FOS, FOSB, JUN, JUND, MAPK12, LCN2, S100A8, S100A9	spatialGE_exp_5
Complement_and_coagulation_cascades	2.00778e-07	8.03113e-06	9	77	VWF, C1QA, C1QB, C1QC, C1R, C1S, C3, SERPING1, A2M	spatialGE_exp_7
PI3K_Akt_signaling_pathway	3.43256e-05	0.000686511	14	342	PDGFRB, ITGA11, COL1A1, COL1A2, COL4A1, COL4A2, COL6A1, COL6A2, COL6A3, COMP, FN1, THBS1, THBS2, VWF	spatialGE_exp_7
IL_17_signaling_pathway	4.16592e-07	1.66637e-05	14	90	MAPK13, CEBPB, CXCL1, DEFB4A, MMP9, CXCL8, MMP1, MMP3, LCN2, CXCL6, CXCL5, S100A8, S100A9, IL1B	spatialGE_exp_10
TNF_signaling_pathway	0.000377899	0.00755797	11	108	MAPK13, CEBPB, CXCL1, CXCL5, IL1B, BCL3, SOCS3, JUNB, MMP3, MMP9, EDN1	spatialGE_exp_10
Endocrine_resistance	0.000486955	0.0097391	3	90	MMP2, JUN, FOS	spatialGE_psf_1
IL_17_signaling_pathway	0.000486955	0.0097391	3	90	FOS, FOSB, JUN	spatialGE_psf_1
PI3K_Akt_signaling_pathway	0.00265957	0.0354609	4	342	COL1A1, COL1A2, COMP, TNXB	spatialGE_psf_1
IL_17_signaling_pathway	5.55417e-05	0.00222167	5	90	FOS, FOSB, JUN, S100A8, S100A9	spatialGE_psf_2
IL_17_signaling_pathway	2.48249e-05	0.000992994	8	90	FOS, FOSB, JUN, JUND, CEBPB, LCN2, S100A8, S100A9	spatialGE_psf_3
Complement_and_coagulation_cascades	0.00053558	0.0107116	6	77	C1R, C1S, C3, SERPING1, CLU, CFD	spatialGE_psf_3
Apoptosis	0.00185264	0.0202001	7	132	TNFSF10, LMNA, JUN, FOS, CTSK, CTSF, MCL1	spatialGE_psf_3
PI3K_Akt_signaling_pathway	0.00202001	0.0202001	12	342	EGFR, COL1A1, COL1A2, COL6A1, COL6A2, COL6A3, COMP, FN1, THBS1, THBS2, TNXB, MCL1	spatialGE_psf_3
TNF_signaling_pathway	0.00308491	0.0246792	6	108	CEBPB, JUN, JAG1, SOCS3, FOS, JUNB	spatialGE_psf_3
Endocrine_resistance	0.00677127	0.0451418	5	90	MMP2, EGFR, JAG1, JUN, FOS	spatialGE_psf_3
HIF_1_signaling_pathway	0.00024856	0.00994238	9	91	SLC2A1, EGFR, PDK1, HK1, TF, TIMP1, HMOX1, IFNGR2, STAT3	spatialGE_psf_5
PI3K_Akt_signaling_pathway	0.0010355	0.0147948	18	342	EGFR, FOXO3, VEGFB, GNB4, ITGB3, ITGB5, COL1A1, COL1A2, COL6A1, COL6A2, COL6A3, COMP, FN1, LAMC1, THBS1, THBS2, MCL1, SGK3	spatialGE_psf_5
IL_17_signaling_pathway	0.00110961	0.0147948	8	90	FOS, FOSB, JUN, JUND, MAPK12, LCN2, S100A8, S100A9	spatialGE_psf_5
PI3K_Akt_signaling_pathway	0.000209265	0.00837059	15	342	PIK3R3, EGFR, FGFR2, ITGB4, ITGB8, COL1A1, COL1A2, COL2A1, COL6A1, COL6A2, COL6A3, TNC, LAMB3, THBS1, THBS2	spatialGE_psf_6
Fc_gamma_R_mediated_phagocytosis	0.00172624	0.0345247	6	85	PIK3R3, WASL, ASAP1, MARCKS, MARCKSL1, MYO10	spatialGE_psf_6
Fc_gamma_R_mediated_phagocytosis	0.000368957	0.0147583	10	85	PIK3R3, PLA2G4E, PLA2G4F, PLA2G4D, VAV3, PLD1, ASAP1, ASAP3, MARCKSL1, MYO10	spatialGE_psf_7
TNF_signaling_pathway	1.84059e-16	7.36236e-15	15	108	BIRC3, NFKBIA, CEBPB, CCL5, CXCL5, CXCL10, IL1B, BCL3, SOCS3, TNFAIP3, TRAF1, MMP9, ICAM1, PTGS2, IRF1	spatialGE_psf_8
NOD_like_receptor_signaling_pathway	5.98115e-14	1.19623e-12	15	158	IL1B, STAT1, GBP5, GBP2, GBP4, GBP1, NFKBIA, BIRC3, CYBB, NAMPT, TNFAIP3, OAS1, OAS2, CXCL8, CCL5	spatialGE_psf_8
IL_17_signaling_pathway	2.31979e-10	3.09306e-09	10	90	NFKBIA, CEBPB, MMP9, TNFAIP3, CXCL8, PTGS2, CXCL5, CXCL10, S100A9, IL1B	spatialGE_psf_8
NF_kappa_B_signaling_pathway	6.01908e-09	6.01908e-08	9	92	BIRC3, NFKBIA, IL1B, TNFAIP3, TRAF1, CXCL8, BCL2A1, PTGS2, ICAM1	spatialGE_psf_8
Complement_and_coagulation_cascades	2.69761e-08	2.15809e-07	8	77	C1QA, C1QB, C1QC, SERPING1, C2, PLAUR, ITGAX, CFB	spatialGE_psf_8
Toll_like_receptor_signaling_pathway	1.95846e-07	1.30564e-06	8	99	CXCL11, CXCL10, CXCL8, IL1B, CCL5, STAT1, NFKBIA, CXCL9	spatialGE_psf_8
C_type_lectin_receptor_signaling_pathway	2.66415e-07	1.52237e-06	8	103	FCER1G, LSP1, IL1B, STAT1, BCL3, NFKBIA, IRF1, PTGS2	spatialGE_psf_8
Chemokine_signaling_pathway	2.67982e-06	1.33991e-05	9	187	CXCL8, CXCL10, CXCL9, CCL5, CCL8, CXCL11, CXCL5, STAT1, NFKBIA	spatialGE_psf_8
RIG_I_like_receptor_signaling_pathway	6.23489e-05	0.000277106	5	67	IFIH1, NFKBIA, ISG15, CXCL8, CXCL10	spatialGE_psf_8
Apoptosis	0.000181781	0.000727126	6	132	BIRC3, NFKBIA, TNFSF10, BCL2A1, TRAF1, CTSS	spatialGE_psf_8
Cytosolic_DNA_sensing_pathway	0.000445389	0.0016196	4	57	IL1B, CXCL10, NFKBIA, CCL5	spatialGE_psf_8
JAK_STAT_signaling_pathway	0.00283854	0.00946181	5	154	SOCS1, SOCS3, STAT1, IL2RG, OSM	spatialGE_psf_8
IL_17_signaling_pathway	1.00512e-05	0.00040205	8	90	FOS, FOSB, JUN, JUND, CEBPB, LCN2, S100A8, S100A9	vesalius_exp_1
Apoptosis	0.000901598	0.018032	7	132	TNFSF10, LMNA, JUN, FOS, CTSK, CTSF, MCL1	vesalius_exp_1
TNF_signaling_pathway	0.00165041	0.0203639	6	108	CEBPB, JUN, JAG1, SOCS3, FOS, JUNB	vesalius_exp_1
Complement_and_coagulation_cascades	0.00203639	0.0203639	5	77	C1R, C1S, C3, CLU, CFD	vesalius_exp_1
Endocrine_resistance	0.00401256	0.0321005	5	90	MMP2, EGFR, JAG1, JUN, FOS	vesalius_exp_1
PI3K_Akt_signaling_pathway	0.00689834	0.0459889	10	342	EGFR, COL1A1, COL1A2, COL6A1, COL6A2, COL6A3, COMP, THBS1, THBS2, MCL1	vesalius_exp_1
IL_17_signaling_pathway	0.000213284	0.00614847	4	90	FOS, CXCL10, S100A8, S100A9	vesalius_exp_3
Toll_like_receptor_signaling_pathway	0.000307423	0.00614847	4	99	CXCL11, CXCL10, CXCL9, FOS	vesalius_exp_3
PI3K_Akt_signaling_pathway	2.06937e-05	0.000827747	15	342	EGFR, FGF7, ITGB4, ITGB8, COL1A1, COL1A2, COL2A1, COL6A1, COL6A2, COL6A3, COMP, FN1, LAMB3, THBS1, THBS2	vesalius_exp_4
IL_17_signaling_pathway	0.00107593	0.0231302	8	90	FOS, FOSB, JUN, JUND, MAPK12, LCN2, S100A8, S100A9	vesalius_exp_5
HIF_1_signaling_pathway	0.00115651	0.0231302	8	91	SLC2A1, EGFR, PDK1, HK1, TF, HMOX1, IFNGR2, STAT3	vesalius_exp_5
IL_17_signaling_pathway	4.16263e-08	1.66505e-06	8	90	FOS, FOSB, JUN, JUND, CXCL8, LCN2, S100A8, S100A9	vesalius_exp_6
Complement_and_coagulation_cascades	0.000947886	0.0189577	4	77	C1R, C3, CLU, CFD	vesalius_exp_6
Toll_like_receptor_signaling_pathway	0.00239866	0.0319821	4	99	CXCL8, FOS, JUN, CTSK	vesalius_exp_6
PI3K_Akt_signaling_pathway	9.38678e-05	0.00375471	12	342	COL1A1, COL1A2, COL6A1, COL6A2, COL6A3, COL9A1, COMP, FN1, SPP1, THBS1, THBS2, TNXB	vesalius_exp_7
Endocrine_resistance	0.000200358	0.00400716	6	90	MMP2, PRKACB, JAG1, NOTCH3, JUN, FOS	vesalius_exp_7
IL_17_signaling_pathway	0.00156931	0.0209241	5	90	FOS, FOSB, JUN, S100A8, S100A9	vesalius_exp_7
IL_17_signaling_pathway	1.81394e-09	7.25576e-08	8	90	NFKBIA, CEBPB, CXCL8, LCN2, PTGS2, S100A8, S100A9, IL1B	vesalius_exp_8
NF_kappa_B_signaling_pathway	0.00042409	0.00776963	4	92	NFKBIA, IL1B, CXCL8, PTGS2	vesalius_exp_8
C_type_lectin_receptor_signaling_pathway	0.000650237	0.00776963	4	103	IL1B, NFKBIA, CALML5, PTGS2	vesalius_exp_8
TNF_signaling_pathway	0.000776963	0.00776963	4	108	NFKBIA, CEBPB, IL1B, PTGS2	vesalius_exp_8
NOD_like_receptor_signaling_pathway	0.00314126	0.0251301	4	158	IL1B, NFKBIA, NAMPT, CXCL8	vesalius_exp_8
Toll_like_receptor_signaling_pathway	0.00645297	0.0430198	3	99	CXCL8, IL1B, NFKBIA	vesalius_exp_8
IL_17_signaling_pathway	5.22863e-08	2.09145e-06	8	90	CXCL1, MMP1, LCN2, CXCL6, CXCL5, S100A8, S100A9, IL1B	vesalius_exp_9
Chemokine_signaling_pathway	0.000785666	0.0157133	6	187	CXCL1, PPBP, CXCL6, CXCL5, CXCL12, CXCL14	vesalius_exp_9
PI3K_Akt_signaling_pathway	4.96456e-05	0.00198582	11	342	PDGFRB, ITGA11, COL1A1, COL1A2, COL6A1, COL6A2, COL6A3, COMP, FN1, THBS1, THBS2	vesalius_exp_10
Complement_and_coagulation_cascades	0.00026931	0.0053862	5	77	C1QA, C1QB, C1QC, C1R, C1S	vesalius_exp_10
IL_17_signaling_pathway	4.29988e-06	0.000171995	7	90	FOS, FOSB, JUN, CEBPB, LCN2, S100A8, S100A9	vesalius_psf_1
Complement_and_coagulation_cascades	0.00244797	0.0489593	4	77	C1R, C1S, CLU, CFD	vesalius_psf_1
IL_17_signaling_pathway	6.14245e-05	0.00245698	7	90	FOS, FOSB, MAPK13, CEBPB, CXCL8, S100A8, S100A9	vesalius_psf_2
PI3K_Akt_signaling_pathway	0.000498344	0.0199337	15	342	EGFR, FGF7, ITGB4, ITGB8, COL1A1, COL1A2, COL2A1, COL6A1, COL6A2, COL6A3, COMP, FN1, LAMB3, THBS1, THBS2	vesalius_psf_3
PI3K_Akt_signaling_pathway	0.000206459	0.00825835	20	342	EGFR, FOXO3, VEGFB, GNB4, ITGA6, ITGB3, ITGB5, COL1A1, COL1A2, COL6A1, COL6A2, COL6A3, COMP, FN1, LAMC1, THBS1, THBS2, TNXB, MCL1, SGK3	vesalius_psf_4
IL_17_signaling_pathway	0.00132984	0.0190465	8	90	FOS, FOSB, JUN, JUND, MAPK12, LCN2, S100A8, S100A9	vesalius_psf_4
HIF_1_signaling_pathway	0.00142849	0.0190465	8	91	SLC2A1, EGFR, PDK1, HK1, TF, TIMP1, HMOX1, STAT3	vesalius_psf_4
IL_17_signaling_pathway	0.000125223	0.00500893	7	90	FOS, FOSB, JUN, CEBPB, LCN2, S100A8, S100A9	vesalius_psf_5
Complement_and_coagulation_cascades	0.000379477	0.00758953	6	77	C1R, C1S, C3, SERPING1, CLU, CFD	vesalius_psf_5
PI3K_Akt_signaling_pathway	0.00116581	0.0127736	12	342	EGFR, COL1A1, COL1A2, COL6A1, COL6A2, COL6A3, COMP, FN1, THBS1, THBS2, TNXB, MCL1	vesalius_psf_5
Apoptosis	0.00127736	0.0127736	7	132	TNFSF10, LMNA, JUN, FOS, CTSK, CTSF, MCL1	vesalius_psf_5
TNF_signaling_pathway	0.00223308	0.0178646	6	108	CEBPB, JUN, JAG1, SOCS3, FOS, JUNB	vesalius_psf_5
Endocrine_resistance	0.00516693	0.0344462	5	90	MMP2, EGFR, JAG1, JUN, FOS	vesalius_psf_5
IL_17_signaling_pathway	1.00955e-08	4.0382e-07	7	90	FOS, FOSB, JUN, JUND, LCN2, S100A8, S100A9	vesalius_psf_6
IL_17_signaling_pathway	0.000348456	0.0139382	4	90	FOS, FOSB, S100A8, S100A9	vesalius_psf_7
IL_17_signaling_pathway	3.09236e-07	1.23695e-05	9	90	CXCL1, MMP9, MMP1, LCN2, CXCL6, CXCL5, S100A8, S100A9, IL1B	vesalius_psf_8
IL_17_signaling_pathway	5.84536e-13	2.33814e-11	10	90	IL6, CXCL1, CCL2, MMP9, TNFAIP3, CXCL8, MMP3, CXCL6, CXCL5, IL1B	vesalius_psf_10
TNF_signaling_pathway	3.7703e-12	7.54059e-11	10	108	BIRC3, CCL2, CXCL1, CXCL5, IL1B, IL6, BCL3, TNFAIP3, MMP3, MMP9	vesalius_psf_10
NOD_like_receptor_signaling_pathway	7.42669e-08	9.90225e-07	8	158	IL1B, BIRC3, NAMPT, TNFAIP3, IL6, CXCL8, CXCL1, CCL2	vesalius_psf_10
Chemokine_signaling_pathway	2.71841e-07	2.71841e-06	8	187	CXCL1, CXCL8, CCL2, CCL19, CCL22, CXCL6, CXCL5, CXCL14	vesalius_psf_10
NF_kappa_B_signaling_pathway	1.7154e-05	0.000137232	5	92	BIRC3, IL1B, TNFAIP3, CXCL8, CCL19	vesalius_psf_10
C_type_lectin_receptor_signaling_pathway	0.000459904	0.00306603	4	103	IL1B, IL6, BCL3, CCL22	vesalius_psf_10
Toll_like_receptor_signaling_pathway	0.00500788	0.0286165	3	99	CXCL8, IL1B, IL6	vesalius_psf_10
IL_17_signaling_pathway	0.000420406	0.0168163	7	90	CEBPB, DEFB4A, MMP9, LCN2, CXCL5, S100A8, S100A9	vesalius_psf_12
IL_17_signaling_pathway	4.9398e-17	1.97592e-15	16	90	IL6, NFKBIA, CEBPB, CXCL1, CXCL2, CXCL3, CCL2, MMP9, TNFAIP3, CXCL8, LCN2, CXCL6, CXCL5, S100A8, S100A9, IL1B	vesalius_psf_14
TNF_signaling_pathway	2.25531e-14	4.51061e-13	15	108	BIRC3, NFKBIA, CEBPB, CCL2, CXCL1, CXCL2, CXCL3, CXCL5, IL1B, IL6, BCL3, SOCS3, TNFAIP3, MMP9, ICAM1	vesalius_psf_14
NF_kappa_B_signaling_pathway	6.42088e-09	8.56118e-08	10	92	BIRC3, NFKBIA, IL1B, NFKB2, RELB, TNFAIP3, CXCL8, BCL2A1, CXCL2, ICAM1	vesalius_psf_14
NOD_like_receptor_signaling_pathway	1.19247e-07	1.19247e-06	11	158	IL1B, NFKBIA, BIRC3, NAMPT, TNFAIP3, IL6, CXCL8, CXCL1, CXCL2, CXCL3, CCL2	vesalius_psf_14
Chemokine_signaling_pathway	3.47464e-05	0.000277971	9	187	CXCL1, CXCL2, CXCL3, CXCL8, PPBP, CCL2, CXCL6, CXCL5, NFKBIA	vesalius_psf_14
Complement_and_coagulation_cascades	5.2183e-05	0.000347887	6	77	C1QA, C1QC, PLAUR, F3, ITGAX, CFB	vesalius_psf_14
C_type_lectin_receptor_signaling_pathway	0.00026208	0.0014976	6	103	IL1B, IL6, BCL3, NFKBIA, NFKB2, RELB	vesalius_psf_14
Apoptosis	0.00565132	0.0282566	5	132	BIRC3, NFKBIA, BCL2A1, CTSF, TUBA4A	vesalius_psf_14
Toll_like_receptor_signaling_pathway	0.0104806	0.042554	4	99	CXCL8, IL1B, IL6, NFKBIA	vesalius_psf_14
JAK_STAT_signaling_pathway	0.0106385	0.042554	5	154	SOCS1, SOCS3, IL7R, IL6, OSM	vesalius_psf_14
Cytosolic_DNA_sensing_pathway	0.0129518	0.0470974	3	57	IL1B, IL6, NFKBIA	vesalius_psf_14
PI3K_Akt_signaling_pathway	2.07646e-08	8.30583e-07	20	342	AKT3, CSF1R, PDGFRB, GNB4, ITGA11, COL1A1, COL1A2, COL4A1, COL4A2, COL6A1, COL6A2, COL6A3, COMP, FN1, LAMA2, THBS1, THBS2, VWF, IL2RG, CCND2	vesalius_psf_15
Complement_and_coagulation_cascades	6.41569e-07	1.28314e-05	9	77	VWF, C1QA, C1QB, C1QC, C1R, C1S, SERPING1, A2M, C2	vesalius_psf_15
NOD_like_receptor_signaling_pathway	6.66362e-06	8.88482e-05	11	158	STAT1, STAT2, ANTXR1, GBP5, GBP2, GBP4, GBP1, CYBB, OAS1, OAS2, CCL5	vesalius_psf_15
Toll_like_receptor_signaling_pathway	4.26299e-05	0.000426299	8	99	CXCL11, CXCL10, CCL5, AKT3, STAT1, CD14, CXCL9, CTSK	vesalius_psf_15
JAK_STAT_signaling_pathway	0.000886674	0.00709339	8	154	AKT3, SOCS1, STAT1, STAT2, IL2RG, IL10RA, PDGFRB, CCND2	vesalius_psf_15
Chemokine_signaling_pathway	0.0030197	0.0201313	8	187	CXCL10, CXCL9, CCL5, CXCL11, GNB4, STAT1, STAT2, AKT3	vesalius_psf_15

## Sheet: PSF markers
Sink_ID	Pathway_name	Sink	Process	p_val	avg_log2FC	pct.1	pct.2	p_val_adj	cluster
110; cAMP-signaling-pathway	cAMP_signaling_pathway	FOS	Hyperexcitability cell death/survival(hippocampal neuron)	8.63509e-167	1.30133	1	1	6.12228e-164	seurat_exp_0
119; MAPK-signaling-pathway	MAPK_signaling_pathway	FOS	DNA; Proliferation differentiation	5.57791e-161	1.31806	1	1	3.95474e-158	seurat_exp_0
126; Endocrine-resistance	Endocrine_resistance	FOS	DNA; Transcription Proliferation	2.97413e-148	1.46399	1	1	2.10866e-145	seurat_exp_0
145; Endocrine-resistance	Endocrine_resistance	FOS	DNA; CoA overexpression AP1/SP1 overexpression; Transcription Proliferation	1.26352e-122	0.738152	1	1	8.95839e-120	seurat_exp_0
141; TNF-signaling-pathway	TNF_signaling_pathway	JUN	Cell survival	2.78781e-122	1.1538	1	1	1.97655e-119	seurat_exp_0
35; Wnt-signaling-pathway	Wnt_signaling_pathway	JUN		3.77819e-104	0.974365	1	1	2.67874e-101	seurat_exp_0
108; MAPK-signaling-pathway	MAPK_signaling_pathway	JUN	DNA; Proliferation differentiation, inflammation	3.90898e-103	1.00419	1	1	2.77147e-100	seurat_exp_0
111; cAMP-signaling-pathway	cAMP_signaling_pathway	JUN	Hyperexcitability cell death/survival(hippocampal neuron)	6.26458e-95	0.964421	1	1	4.44159e-92	seurat_exp_0
125; Endocrine-resistance	Endocrine_resistance	JUN	DNA; Transcription Proliferation	7.3167e-94	0.819713	1	1	5.18754e-91	seurat_exp_0
107; MAPK-signaling-pathway	MAPK_signaling_pathway	JUND	DNA; Proliferation differentiation, inflammation	1.68602e-92	0.808928	1	1	1.19539e-89	seurat_exp_0
90; IL-17-signaling-pathway	IL_17_signaling_pathway	IFNG	Inflammantory genes; Antibacterial peptides Th17 cytokines; Inflammention; Host defence; Autoimmune	2.3565e-91	0.675142	1	1	1.67076e-88	seurat_exp_0
86; Apoptosis	Apoptosis	BCL2L11	Pro-apoptotic genes	1.15919e-88	0.57768	1	1	8.21864e-86	seurat_exp_0
85; IL-17-signaling-pathway	IL_17_signaling_pathway	TNF	Inflammantory genes; Antibacterial peptides Th17 cytokines; Inflammention; Host defence; Autoimmune	2.72876e-83	0.671146	1	1	1.93469e-80	seurat_exp_0
107; Apoptosis	Apoptosis	MCL1	Bim-mediated mitochondrial apoptotic events; Apoptosis	1.1631e-77	0.588238	1	1	8.24639e-75	seurat_exp_0
89; IL-17-signaling-pathway	IL_17_signaling_pathway	IL6	Inflammantory genes; Antibacterial peptides Th17 cytokines; Inflammention; Host defence; Autoimmune	1.52027e-75	0.629759	1	1	1.07787e-72	seurat_exp_0
20; NOD-like-receptor-signaling-pathway	NOD_like_receptor_signaling_pathway	IL18		4.62932e-74	-1.2003	1	1	3.28219e-71	seurat_exp_0
83; Apoptosis	Apoptosis	TP53	Pro-apoptotic genes	1.09588e-72	0.578966	1	1	7.76976e-70	seurat_exp_0
85; Apoptosis	Apoptosis	FASLG	Pro-apoptotic genes	7.51122e-72	0.567511	1	1	5.32546e-69	seurat_exp_0
86; IL-17-signaling-pathway	IL_17_signaling_pathway	IL1B	Inflammantory genes; Antibacterial peptides Th17 cytokines; Inflammention; Host defence; Autoimmune	1.08362e-70	0.617514	1	1	7.68285e-68	seurat_exp_0
19; NOD-like-receptor-signaling-pathway	NOD_like_receptor_signaling_pathway	IL1B		1.24726e-64	-1.88046	1	1	8.84308e-62	seurat_exp_0
64; Complement-and-coagulation-cascades	Complement_and_coagulation_cascades	VSIG4	Phagocytosis	3.55425e-64	2.24539	1	1	2.51996e-61	seurat_exp_0
24; B-cell-receptor-signaling-pathway	B_cell_receptor_signaling_pathway	FOS	DNA; B cell ontogeny; Autoimmunity; Anergy; Immuno response Ig production GC formation	9.81574e-64	0.667677	1	1	6.95936e-61	seurat_exp_0
60; IL-17-signaling-pathway	IL_17_signaling_pathway	IL5	Th2 cytokines; Induces Th2 cell responess and suppresses TH17 cell responess	5.89264e-61	0.505501	1	1	4.17788e-58	seurat_exp_0
84; Apoptosis	Apoptosis	FAS	Pro-apoptotic genes	7.60164e-61	0.538449	1	1	5.38956e-58	seurat_exp_0
97; PI3K-Akt-signaling-pathway	PI3K_Akt_signaling_pathway	MCL1	Cell survival	1.577e-60	0.596696	1	1	1.11809e-57	seurat_exp_0
29; B-cell-receptor-signaling-pathway	B_cell_receptor_signaling_pathway	RAC1		3.40382e-56	-0.535229	1	1	2.41331e-53	seurat_exp_0
114; Apoptosis	Apoptosis	HRK	Pro-apoptotic genes	6.10848e-56	0.514545	1	1	4.33091e-53	seurat_exp_0
39; HIF-1-signaling-pathway	HIF_1_signaling_pathway	C00002	ATP	1.97606e-55	-1.14418	1	1	1.40103e-52	seurat_exp_0
40; TNF-signaling-pathway	TNF_signaling_pathway	JUN		3.0209e-53	0.517	1	1	2.14182e-50	seurat_exp_0
25; Fc-epsilon-RI-signaling-pathway	Fc_epsilon_RI_signaling_pathway	MAPK14	DNA; Cytokine gene transcription	3.95104e-53	-0.965259	1	1	2.80129e-50	seurat_exp_0
42; Fc-gamma-R-mediated-phagocytosis	Fc_gamma_R_mediated_phagocytosis	MYO10	Phagocytosis; Membrane remodeling; Focal exocytosis; Pseudopod extention; Particle internalization	6.63724e-53	-0.525925	1	1	4.7058e-50	seurat_exp_0
51; Fc-gamma-R-mediated-phagocytosis	Fc_gamma_R_mediated_phagocytosis	NCF1	NADPH oxidase; Digestion of bacterium; Respiratory burst in phagosome	6.88521e-52	-0.721016	1	1	4.88161e-49	seurat_exp_0
33; C-type-lectin-receptor-signaling-pathway	C_type_lectin_receptor_signaling_pathway	IL1B	Th1 Th17 cell differentiation	1.21752e-46	-5.21634	1	1	8.6322e-44	seurat_exp_0
58; FoxO-signaling-pathway	FoxO_signaling_pathway	KLF2	Immuno-regulation	5.2137e-46	0.573376	1	1	3.69651e-43	seurat_exp_0
168; C-type-lectin-receptor-signaling-pathway	C_type_lectin_receptor_signaling_pathway	IL12A	Th1 Th17 cell differentiation	3.10188e-44	0.843632	1	1	2.19924e-41	seurat_exp_0
62; Complement-and-coagulation-cascades	Complement_and_coagulation_cascades	ITGAM	Phagocytosis	4.58056e-44	2.07756	1	1	3.24762e-41	seurat_exp_0
164; C-type-lectin-receptor-signaling-pathway	C_type_lectin_receptor_signaling_pathway	EGR2	Th1 Th17 cell differentiation	3.20116e-42	-0.779337	1	1	2.26962e-39	seurat_exp_0
58; Fc-gamma-R-mediated-phagocytosis	Fc_gamma_R_mediated_phagocytosis	C00219	Phagocytosis; Membrane remodeling; Focal exocytosis; Pseudopod extention; Particle internalization	6.34454e-41	-0.642747	1	1	4.49828e-38	seurat_exp_0
29; ErbB-signaling-pathway	ErbB_signaling_pathway	STAT5A	DNA; Survival	2.30553e-40	-0.940126	1	1	1.63462e-37	seurat_exp_0
11; Fc-epsilon-RI-signaling-pathway	Fc_epsilon_RI_signaling_pathway	C00374	Degranulation; Heparin; Toxic to parasites; Increase vascular permeabilityl Cause smiith muscle contraction	3.83229e-40	-0.607066	1	1	2.71709e-37	seurat_exp_0
12; Fc-epsilon-RI-signaling-pathway	Fc_epsilon_RI_signaling_pathway	C00388	Degranulation; Histamine; Toxic to parasites; Increase vascular permeabilityl Cause smiith muscle contraction	3.83229e-40	-0.607066	1	1	2.71709e-37	seurat_exp_0
63; Complement-and-coagulation-cascades	Complement_and_coagulation_cascades	ITGAX	Phagocytosis	5.51884e-40	2.02229	1	1	3.91286e-37	seurat_exp_0
159; C-type-lectin-receptor-signaling-pathway	C_type_lectin_receptor_signaling_pathway	PTGS2	Th1 Th17 cell differentiation	6.62946e-39	-0.664388	1	1	4.70029e-36	seurat_exp_0
7; Apoptosis	Apoptosis	ENDOG	DNA fragmentation; Apoptosis	1.63278e-37	-0.740945	1	1	1.15764e-34	seurat_exp_0
47; Fc-epsilon-RI-signaling-pathway	Fc_epsilon_RI_signaling_pathway	MAPK8	DNA; Cytokine gene transcription	9.00034e-37	-0.774339	1	1	6.38124e-34	seurat_exp_0
61; Complement-and-coagulation-cascades	Complement_and_coagulation_cascades	CR2		1.1575e-36	2.23211	1	1	8.2067e-34	seurat_exp_0
157; C-type-lectin-receptor-signaling-pathway	C_type_lectin_receptor_signaling_pathway	IL10	Th1 Th17 cell differentiation	2.11073e-36	-0.625047	1	1	1.4965e-33	seurat_exp_0
89; C-type-lectin-receptor-signaling-pathway	C_type_lectin_receptor_signaling_pathway	IL2	Th1 Th17 cell differentiation	3.41568e-36	-0.600772	1	1	2.42171e-33	seurat_exp_0
56; ErbB-signaling-pathway	ErbB_signaling_pathway	JUN	DNA; Angiogenesis	3.35513e-31	-1.04266	1	1	2.37879e-28	seurat_exp_0
27; Fc-gamma-R-mediated-phagocytosis	Fc_gamma_R_mediated_phagocytosis	ARPC5	Phagocytosis; Membrane traficking; Particle internalization; Phagosome closure; Phagosome-lysosome fusion	9.69089e-29	-1.02896	1	1	6.87084e-26	seurat_exp_0
86; Toll-like-receptor-signaling-pathway	Toll_like_receptor_signaling_pathway	IL12A	Inflammatory cytokines;Proinflammatory effects	2.11982e-28	0.760019	1	1	1.50295e-25	seurat_exp_0
11; Apoptosis	Apoptosis	DFFB	DNA fragmentation; Apoptosis	3.95835e-26	-0.681221	1	1	2.80647e-23	seurat_exp_0
35; ErbB-signaling-pathway	ErbB_signaling_pathway	CBL	Receptor ubiquitylation;Degradation	7.08249e-25	-0.932026	1	1	5.02149e-22	seurat_exp_0
47; ErbB-signaling-pathway	ErbB_signaling_pathway	PRKCA	Cellular targets	1.32633e-24	-1.17503	1	1	9.40365e-22	seurat_exp_0
49; Fc-gamma-R-mediated-phagocytosis	Fc_gamma_R_mediated_phagocytosis	ARF6	Phagocytosis; Membrane traficking; Particle internalization; Phagosome closure; Phagosome-lysosome fusion	2.03331e-23	-0.657113	1	1	1.44161e-20	seurat_exp_0
57; ErbB-signaling-pathway	ErbB_signaling_pathway	ABL1		8.17836e-23	-0.888533	1	1	5.79846e-20	seurat_exp_0
42; PPAR-signaling-pathway	PPAR_signaling_pathway	CD36	Fatty acid transport; Lipid metabolism	8.7014e-22	-0.610271	1	1	6.16929e-19	seurat_exp_0
71; Complement-and-coagulation-cascades	Complement_and_coagulation_cascades	CR1	Phagocytosis	3.65487e-20	1.96189	1	1	2.5913e-17	seurat_exp_0
76; Toll-like-receptor-signaling-pathway	Toll_like_receptor_signaling_pathway	CCL3L3	Chemotactic effects ( Nutrophil, Immature DC )( NK cell )	7.18604e-20	0.533539	1	1	5.09491e-17	seurat_exp_0
46; Toll-like-receptor-signaling-pathway	Toll_like_receptor_signaling_pathway	TNF	Inflammatory cytokines;Proinflammatory effects	1.88618e-19	0.58891	1	1	1.3373e-16	seurat_exp_0
87; Toll-like-receptor-signaling-pathway	Toll_like_receptor_signaling_pathway	CCL4L1	Chemotactic effects ( Nutrophil, Immature DC )( NK cell )	3.3584e-19	0.654737	1	1	2.38111e-16	seurat_exp_0
178; NOD-like-receptor-signaling-pathway	NOD_like_receptor_signaling_pathway	IL1B	Pro-inflammatory cytokines	5.05655e-19	-0.505088	1	1	3.58509e-16	seurat_exp_0
6; Fc-epsilon-RI-signaling-pathway	Fc_epsilon_RI_signaling_pathway	C00696	Generation of eicosanoids	4.24431e-18	-1.0918	1	1	3.00921e-15	seurat_exp_0
7; Fc-epsilon-RI-signaling-pathway	Fc_epsilon_RI_signaling_pathway	C05952	Generation of eicosanoids	4.24431e-18	-1.0918	1	1	3.00921e-15	seurat_exp_0
8; Fc-epsilon-RI-signaling-pathway	Fc_epsilon_RI_signaling_pathway	C05951	Generation of eicosanoids	4.24431e-18	-1.0918	1	1	3.00921e-15	seurat_exp_0
9; Fc-epsilon-RI-signaling-pathway	Fc_epsilon_RI_signaling_pathway	C02166	Generation of eicosanoids	4.24431e-18	-1.0918	1	1	3.00921e-15	seurat_exp_0
48; ErbB-signaling-pathway	ErbB_signaling_pathway	CAMK2A	Cellular targets	2.76841e-17	-1.14978	1	1	1.9628e-14	seurat_exp_0
65; Complement-and-coagulation-cascades	Complement_and_coagulation_cascades	C5AR1	Degranulation, chemotaxis	6.36085e-17	1.698	1	1	4.50985e-14	seurat_exp_0
95; Endocrine-resistance	Endocrine_resistance	E2F1	Cell cycle progression	1.63066e-16	-0.507493	1	1	1.15614e-13	seurat_exp_0
103; Chemokine-signaling-pathway	Chemokine_signaling_pathway	PAK1		2.06377e-16	-0.551099	1	1	1.46321e-13	seurat_exp_0
66; Complement-and-coagulation-cascades	Complement_and_coagulation_cascades	C3AR1	Degranulation, chemotaxis	2.46656e-16	1.62089	1	1	1.74879e-13	seurat_exp_0
39; Toll-like-receptor-signaling-pathway	Toll_like_receptor_signaling_pathway	IL6	Inflammatory cytokines;Proinflammatory effects	3.08561e-16	0.62792	1	1	2.1877e-13	seurat_exp_0
172; NOD-like-receptor-signaling-pathway	NOD_like_receptor_signaling_pathway	CXCL8	Chemokines	4.18644e-14	-0.86385	1	1	2.96819e-11	seurat_exp_0
6; B-cell-receptor-signaling-pathway	B_cell_receptor_signaling_pathway	NFKB1	DNA; B cell ontogeny; Autoimmunity; Anergy; Immuno response Ig production GC formation	1.46463e-13	-1.03907	1	1	1.03842e-10	seurat_exp_0
65; ErbB-signaling-pathway	ErbB_signaling_pathway	MYC	DNA; Adhesion	2.1358e-13	-0.648137	1	1	1.51428e-10	seurat_exp_0
148; C-type-lectin-receptor-signaling-pathway	C_type_lectin_receptor_signaling_pathway	IL1B	Th1 Th17 cell differentiation	1.06333e-12	-1.89475	1	1	7.539e-10	seurat_exp_0
2; PI3K-Akt-signaling-pathway	PI3K_Akt_signaling_pathway	EIF4E	Protein synthesis	2.06741e-10	-0.578708	1	1	1.4658e-07	seurat_exp_0
67; Rap1-signaling-pathway	Rap1_signaling_pathway	AKT3	Proliferation survival gene activation	3.28064e-10	0.604037	1	1	2.32598e-07	seurat_exp_0
28; C-type-lectin-receptor-signaling-pathway	C_type_lectin_receptor_signaling_pathway	IL12A	Th1 Th17 cell differentiation	1.04849e-09	-0.57579	1	1	7.43383e-07	seurat_exp_0
138; TNF-signaling-pathway	TNF_signaling_pathway	NFKB1	Degradation; Cell survival	1.34863e-07	-0.782442	1	1	9.5618e-05	seurat_exp_0
113; NF-kappa-B-signaling-pathway	NF_kappa_B_signaling_pathway	CFLAR	Survival	2.84155e-06	-2.21549	1	1	0.00201466	seurat_exp_0
43; ErbB-signaling-pathway	ErbB_signaling_pathway	PTK2	Adhesion Migration	1.2437e-05	-0.818891	1	1	0.00881787	seurat_exp_0
120; TNF-signaling-pathway	TNF_signaling_pathway	DNM1L	Necroptosis	3.27982e-05	-0.586973	1	1	0.0232539	seurat_exp_0
76; Hippo-signaling-pathway	Hippo_signaling_pathway	MYC	Anti-apoptotic genes; Pro-proliferation genes	5.17229e-05	-0.55753	1	1	0.0366715	seurat_exp_0
54; AMPK-signaling-pathway	AMPK_signaling_pathway	SLC2A4	Activated mitochondrial biogeneses	9.81894e-70	0.783464	1	1	6.96163e-67	seurat_exp_1
164; cGMP-PKG-signaling-pathway	cGMP_PKG_signaling_pathway	PPIF	Cardioprotection	9.87097e-55	-1.29636	1	1	6.99852e-52	seurat_exp_1
50; HIF-1-signaling-pathway	HIF_1_signaling_pathway	TF	Increase oxygen delivery; Iron metabolism	2.01728e-52	0.640739	1	1	1.43025e-49	seurat_exp_1
50; PPAR-signaling-pathway	PPAR_signaling_pathway	MMP1	Adipocyte differentiation	8.56436e-44	0.610422	1	1	6.07213e-41	seurat_exp_1
40; ErbB-signaling-pathway	ErbB_signaling_pathway	ELK1	DNA; Angiogenesis	4.79969e-29	-1.69542	1	1	3.40298e-26	seurat_exp_1
155; Chemokine-signaling-pathway	Chemokine_signaling_pathway	PXN	Migration	1.4877e-27	0.602862	1	1	1.05478e-24	seurat_exp_1
56; ErbB-signaling-pathway	ErbB_signaling_pathway	JUN	DNA; Angiogenesis	2.67196e-20	-2.54083	1	1	1.89442e-17	seurat_exp_1
35; ErbB-signaling-pathway	ErbB_signaling_pathway	CBL	Receptor ubiquitylation;Degradation	2.6958e-17	-1.52262	1	1	1.91132e-14	seurat_exp_1
43; ErbB-signaling-pathway	ErbB_signaling_pathway	PTK2	Adhesion Migration	2.25985e-14	-1.4224	1	1	1.60223e-11	seurat_exp_1
169; NOD-like-receptor-signaling-pathway	NOD_like_receptor_signaling_pathway	IL18	Pro-inflammatory cytokines	1.04833e-13	-0.682237	1	1	7.43263e-11	seurat_exp_1
54; NF-kappa-B-signaling-pathway	NF_kappa_B_signaling_pathway	CCL13	Lymphoid-tissue homing	1.85783e-13	-0.512107	1	1	1.3172e-10	seurat_exp_1
107; MAPK-signaling-pathway	MAPK_signaling_pathway	JUND	DNA; Proliferation differentiation, inflammation	1.28038e-12	-0.53654	1	1	9.07792e-10	seurat_exp_1
183; NOD-like-receptor-signaling-pathway	NOD_like_receptor_signaling_pathway	CAMP	Antimicrobial peptides; Defensins	1.50033e-12	-0.597146	1	1	1.06373e-09	seurat_exp_1
69; MAPK-signaling-pathway	MAPK_signaling_pathway	HSPB1	DNA; Proliferation differentiation, inflammation	1.65384e-12	-0.970329	1	1	1.17257e-09	seurat_exp_1
171; NOD-like-receptor-signaling-pathway	NOD_like_receptor_signaling_pathway	TNF	Pro-inflammatory cytokines	2.43281e-12	-0.786763	1	1	1.72486e-09	seurat_exp_1
61; Complement-and-coagulation-cascades	Complement_and_coagulation_cascades	CR2		3.35483e-12	-1.46704	1	1	2.37858e-09	seurat_exp_1
178; NOD-like-receptor-signaling-pathway	NOD_like_receptor_signaling_pathway	IL1B	Pro-inflammatory cytokines	2.58857e-09	-1.17995	1	1	1.83529e-06	seurat_exp_1
38; TNF-signaling-pathway	TNF_signaling_pathway	CEBPB		3.89806e-09	-0.633782	1	1	2.76372e-06	seurat_exp_1
48; ErbB-signaling-pathway	ErbB_signaling_pathway	CAMK2A	Cellular targets	4.01602e-09	-1.69287	1	1	2.84736e-06	seurat_exp_1
173; NOD-like-receptor-signaling-pathway	NOD_like_receptor_signaling_pathway	CXCL1	Chemokines	1.11306e-08	-0.739345	1	1	7.89156e-06	seurat_exp_1
3; ErbB-signaling-pathway	ErbB_signaling_pathway	ELK1	DNA; Migration/ Invasion	2.01788e-08	-1.23592	1	1	1.43068e-05	seurat_exp_1
47; ErbB-signaling-pathway	ErbB_signaling_pathway	PRKCA	Cellular targets	2.4241e-08	-1.66729	1	1	1.71869e-05	seurat_exp_1
175; NOD-like-receptor-signaling-pathway	NOD_like_receptor_signaling_pathway	CCL5	Chemokines	3.64439e-08	-0.860945	1	1	2.58387e-05	seurat_exp_1
87; Toll-like-receptor-signaling-pathway	Toll_like_receptor_signaling_pathway	CCL4L1	Chemotactic effects ( Nutrophil, Immature DC )( NK cell )	4.56153e-08	-0.511116	1	1	3.23413e-05	seurat_exp_1
145; Endocrine-resistance	Endocrine_resistance	FOS	DNA; CoA overexpression AP1/SP1 overexpression; Transcription Proliferation	1.0914e-07	-0.952813	1	1	7.73804e-05	seurat_exp_1
170; NOD-like-receptor-signaling-pathway	NOD_like_receptor_signaling_pathway	IL6	Pro-inflammatory cytokines	1.1295e-07	-0.744826	1	1	8.00817e-05	seurat_exp_1
108; MAPK-signaling-pathway	MAPK_signaling_pathway	JUN	DNA; Proliferation differentiation, inflammation	2.27255e-07	-0.625668	1	1	0.000161124	seurat_exp_1
62; C-type-lectin-receptor-signaling-pathway	C_type_lectin_receptor_signaling_pathway	IL23A	Th1 Th17 cell differentiation	2.60647e-07	-0.557236	1	1	0.000184798	seurat_exp_1
46; Toll-like-receptor-signaling-pathway	Toll_like_receptor_signaling_pathway	TNF	Inflammatory cytokines;Proinflammatory effects	2.6715e-07	-0.548891	1	1	0.000189409	seurat_exp_1
75; Hippo-signaling-pathway	Hippo_signaling_pathway	NKD1	Anti-apoptotic genes; Pro-proliferation genes	3.97892e-07	-0.59958	1	1	0.000282106	seurat_exp_1
101; C-type-lectin-receptor-signaling-pathway	C_type_lectin_receptor_signaling_pathway	TNF	Th1 Th17 cell differentiation	4.52266e-07	-0.571595	1	1	0.000320657	seurat_exp_1
172; NOD-like-receptor-signaling-pathway	NOD_like_receptor_signaling_pathway	CXCL8	Chemokines	8.14625e-07	-1.36502	1	1	0.000577569	seurat_exp_1
74; Hippo-signaling-pathway	Hippo_signaling_pathway	AXIN1	Anti-apoptotic genes; Pro-proliferation genes	8.47086e-07	-0.563171	1	1	0.000600584	seurat_exp_1
125; Endocrine-resistance	Endocrine_resistance	JUN	DNA; Transcription Proliferation	1.69101e-06	-1.1021	1	1	0.00119892	seurat_exp_1
77; Hippo-signaling-pathway	Hippo_signaling_pathway	CCND1	Anti-apoptotic genes; Pro-proliferation genes	4.05526e-06	-0.584988	1	1	0.00287518	seurat_exp_1
62; Complement-and-coagulation-cascades	Complement_and_coagulation_cascades	ITGAM	Phagocytosis	5.95333e-06	-1.53994	1	1	0.00422091	seurat_exp_1
78; Hippo-signaling-pathway	Hippo_signaling_pathway	SOX2	Anti-apoptotic genes; Pro-proliferation genes	7.35768e-06	-0.539359	1	1	0.0052166	seurat_exp_1
63; Complement-and-coagulation-cascades	Complement_and_coagulation_cascades	ITGAX	Phagocytosis	1.54933e-05	-1.60607	1	1	0.0109848	seurat_exp_1
29; ErbB-signaling-pathway	ErbB_signaling_pathway	STAT5A	DNA; Survival	2.07262e-05	-1.18038	1	1	0.0146949	seurat_exp_1
6; B-cell-receptor-signaling-pathway	B_cell_receptor_signaling_pathway	NFKB1	DNA; B cell ontogeny; Autoimmunity; Anergy; Immuno response Ig production GC formation	3.29311e-05	-1.05448	1	1	0.0233481	seurat_exp_1
64; C-type-lectin-receptor-signaling-pathway	C_type_lectin_receptor_signaling_pathway	IL1B	Th1 Th17 cell differentiation	5.67838e-05	-0.795839	1	1	0.0402597	seurat_exp_1
80; Hippo-signaling-pathway	Hippo_signaling_pathway	BIRC2	Anti-apoptotic genes; Pro-proliferation genes	7.82267e-184	2.1682	1	1	5.54627e-181	seurat_exp_2
76; Hippo-signaling-pathway	Hippo_signaling_pathway	MYC	Anti-apoptotic genes; Pro-proliferation genes	1.56385e-174	1.8089	1	1	1.10877e-171	seurat_exp_2
78; Hippo-signaling-pathway	Hippo_signaling_pathway	SOX2	Anti-apoptotic genes; Pro-proliferation genes	5.69713e-173	1.80254	1	1	4.03926e-170	seurat_exp_2
75; Hippo-signaling-pathway	Hippo_signaling_pathway	NKD1	Anti-apoptotic genes; Pro-proliferation genes	5.673e-172	1.78639	1	1	4.02216e-169	seurat_exp_2
77; Hippo-signaling-pathway	Hippo_signaling_pathway	CCND1	Anti-apoptotic genes; Pro-proliferation genes	1.55176e-171	1.79679	1	1	1.1002e-168	seurat_exp_2
20; Cell-cycle	Cell_cycle	MCM2	DNA; DNA biosynthesis	5.83388e-160	4.42785	1	1	4.13622e-157	seurat_exp_2
74; Hippo-signaling-pathway	Hippo_signaling_pathway	AXIN1	Anti-apoptotic genes; Pro-proliferation genes	1.58467e-159	1.74407	1	1	1.12353e-156	seurat_exp_2
13; Hippo-signaling-pathway	Hippo_signaling_pathway	BIRC5	Anti-apoptotic genes; Pro-proliferation genes	4.7658e-157	1.31891	1	1	3.37895e-154	seurat_exp_2
26; cAMP-signaling-pathway	cAMP_signaling_pathway	C00076		4.30294e-153	0.914063	1	1	3.05079e-150	seurat_exp_2
181; NOD-like-receptor-signaling-pathway	NOD_like_receptor_signaling_pathway	IFNA1		3.94349e-149	-0.825308	1	1	2.79593e-146	seurat_exp_2
110; cAMP-signaling-pathway	cAMP_signaling_pathway	FOS	Hyperexcitability cell death/survival(hippocampal neuron)	2.84055e-140	-1.11836	1	1	2.01395e-137	seurat_exp_2
126; Endocrine-resistance	Endocrine_resistance	FOS	DNA; Transcription Proliferation	5.33336e-133	-1.96424	1	1	3.78135e-130	seurat_exp_2
95; Hippo-signaling-pathway	Hippo_signaling_pathway	AFP	Anti-apoptotic genes; Pro-proliferation genes	1.91982e-128	0.709169	1	1	1.36115e-125	seurat_exp_2
31; p53-signaling-pathway	p53_signaling_pathway	ADGRB1	Inflammhibition of angiogenesis and metastasis	1.11463e-127	0.958864	1	1	7.9027e-125	seurat_exp_2
96; Hippo-signaling-pathway	Hippo_signaling_pathway	FGF1	Anti-apoptotic genes; Pro-proliferation genes	1.54501e-123	0.708994	1	1	1.09541e-120	seurat_exp_2
168; C-type-lectin-receptor-signaling-pathway	C_type_lectin_receptor_signaling_pathway	IL12A	Th1 Th17 cell differentiation	1.10064e-122	-2.43929	1	1	7.80351e-120	seurat_exp_2
50; HIF-1-signaling-pathway	HIF_1_signaling_pathway	TF	Increase oxygen delivery; Iron metabolism	7.5129e-113	-0.825244	1	1	5.32665e-110	seurat_exp_2
14; Hippo-signaling-pathway	Hippo_signaling_pathway	AREG	Anti-apoptotic genes; Pro-proliferation genes	1.59488e-111	0.623229	1	1	1.13077e-108	seurat_exp_2
24; JAK-STAT-signaling-pathway	JAK_STAT_signaling_pathway	MCL1	Anti-apoptosis	9.97332e-110	-0.84153	1	1	7.07108e-107	seurat_exp_2
90; Hippo-signaling-pathway	Hippo_signaling_pathway	BBC3	Proapoptotic genes	1.20932e-108	0.705616	1	1	8.57409e-106	seurat_exp_2
79; Hippo-signaling-pathway	Hippo_signaling_pathway	SNAI2	Anti-apoptotic genes; Pro-proliferation genes	2.63598e-106	0.970013	1	1	1.86891e-103	seurat_exp_2
23; B-cell-receptor-signaling-pathway	B_cell_receptor_signaling_pathway	FCGR2B		7.19e-105	0.553985	1	1	5.09771e-102	seurat_exp_2
107; Apoptosis	Apoptosis	MCL1	Bim-mediated mitochondrial apoptotic events; Apoptosis	7.56468e-104	-0.768064	1	1	5.36336e-101	seurat_exp_2
111; cAMP-signaling-pathway	cAMP_signaling_pathway	JUN	Hyperexcitability cell death/survival(hippocampal neuron)	3.94871e-103	-0.808776	1	1	2.79963e-100	seurat_exp_2
119; MAPK-signaling-pathway	MAPK_signaling_pathway	FOS	DNA; Proliferation differentiation	9.46287e-99	-1.33129	1	1	6.70918e-96	seurat_exp_2
15; AMPK-signaling-pathway	AMPK_signaling_pathway	FOXO1	Activated mitochondrial biogeneses	8.0016e-98	-0.886628	1	1	5.67313e-95	seurat_exp_2
116; EGFR-tyrosine-kinase-inhibitor-resistance	EGFR_tyrosine_kinase_inhibitor_resistance	STAT3	Abnormal dimerization of STAT 3; DNA; Differentiation; Growth; Proliferation; Survival; Motility; Angiogenesis	7.4886e-97	-1.43326	1	1	5.30942e-94	seurat_exp_2
125; Endocrine-resistance	Endocrine_resistance	JUN	DNA; Transcription Proliferation	1.02236e-96	-1.69026	1	1	7.24852e-94	seurat_exp_2
4; Cell-cycle	Cell_cycle	ORC6	DNA; DNA biosynthesis	4.96543e-96	0.796789	1	1	3.52049e-93	seurat_exp_2
97; PI3K-Akt-signaling-pathway	PI3K_Akt_signaling_pathway	MCL1	Cell survival	1.11492e-95	-0.779368	1	1	7.90476e-93	seurat_exp_2
32; PI3K-Akt-signaling-pathway	PI3K_Akt_signaling_pathway	BCL2L1	Cell survival	2.70773e-93	-0.708402	1	1	1.91978e-90	seurat_exp_2
107; MAPK-signaling-pathway	MAPK_signaling_pathway	JUND	DNA; Proliferation differentiation, inflammation	3.81708e-92	-0.883787	1	1	2.70631e-89	seurat_exp_2
50; p53-signaling-pathway	p53_signaling_pathway	RCHY1	p53 negative feedback	4.10905e-92	0.735087	1	1	2.91331e-89	seurat_exp_2
141; TNF-signaling-pathway	TNF_signaling_pathway	JUN	Cell survival	1.17492e-91	-0.901974	1	1	8.33018e-89	seurat_exp_2
94; Hippo-signaling-pathway	Hippo_signaling_pathway	GLI2	Anti-apoptotic genes; Pro-proliferation genes	1.0449e-87	0.603528	1	1	7.40837e-85	seurat_exp_2
25; PI3K-Akt-signaling-pathway	PI3K_Akt_signaling_pathway	CDKN1B	Cell cycle progression	5.2811e-84	-0.662724	1	1	3.7443e-81	seurat_exp_2
18; EGFR-tyrosine-kinase-inhibitor-resistance	EGFR_tyrosine_kinase_inhibitor_resistance	BAD	Differentiation; Growth; Proliferation; Survival; Motility; Angiogenesis	2.15643e-83	0.539179	1	1	1.52891e-80	seurat_exp_2
52; Hippo-signaling-pathway	Hippo_signaling_pathway	ITGB2	Anti-apoptotic genes; Pro-proliferation genes	2.85241e-83	0.552403	1	1	2.02236e-80	seurat_exp_2
35; Wnt-signaling-pathway	Wnt_signaling_pathway	JUN		3.42402e-83	-0.832995	1	1	2.42763e-80	seurat_exp_2
11; HIF-1-signaling-pathway	HIF_1_signaling_pathway	SLC2A1	Reduce oxygen consumption; Promote anaerobic metabolism	5.36814e-83	-1.07004	1	1	3.80601e-80	seurat_exp_2
108; MAPK-signaling-pathway	MAPK_signaling_pathway	JUN	DNA; Proliferation differentiation, inflammation	5.7423e-82	-0.98715	1	1	4.07129e-79	seurat_exp_2
57; HIF-1-signaling-pathway	HIF_1_signaling_pathway	TIMP1	Increase oxygen delivery; Angiogenesis	1.47602e-80	-0.913454	1	1	1.0465e-77	seurat_exp_2
63; HIF-1-signaling-pathway	HIF_1_signaling_pathway	TIMP1	Matrix and barrier functions	1.47602e-80	-0.913454	1	1	1.0465e-77	seurat_exp_2
112; cAMP-signaling-pathway	cAMP_signaling_pathway	GLI1	Downregulation of Hedgehog signaling (embryonic fibroblast)	2.6932e-80	-0.645463	1	1	1.90948e-77	seurat_exp_2
114; Apoptosis	Apoptosis	HRK	Pro-apoptotic genes	2.48587e-78	-1.2281	1	1	1.76248e-75	seurat_exp_2
114; cAMP-signaling-pathway	cAMP_signaling_pathway	HHIP	Downregulation of Hedgehog signaling (embryonic fibroblast)	5.01119e-78	-0.622823	1	1	3.55293e-75	seurat_exp_2
85; Cell-cycle	Cell_cycle	RAD21		8.60719e-78	1.46707	1	1	6.1025e-75	seurat_exp_2
33; HIF-1-signaling-pathway	HIF_1_signaling_pathway	C00186	Lactate	7.97073e-77	-0.65009	1	1	5.65125e-74	seurat_exp_2
77; AMPK-signaling-pathway	AMPK_signaling_pathway	CCND1	Growth arrest	9.95529e-76	0.51057	1	1	7.0583e-73	seurat_exp_2
145; Endocrine-resistance	Endocrine_resistance	FOS	DNA; CoA overexpression AP1/SP1 overexpression; Transcription Proliferation	6.04e-75	-1.27032	1	1	4.28236e-72	seurat_exp_2
31; JAK-STAT-signaling-pathway	JAK_STAT_signaling_pathway	BCL2L1	Anti-apoptosis	8.91613e-74	-0.548574	1	1	6.32154e-71	seurat_exp_2
53; FoxO-signaling-pathway	FoxO_signaling_pathway	SOD2	Oxidative stress resistance & DNA repair	1.74358e-73	-0.599404	1	1	1.2362e-70	seurat_exp_2
89; HIF-1-signaling-pathway	HIF_1_signaling_pathway	CDKN1A	Reduce oxygen consumption; Regulate proliferation and apoptosis	3.1208e-73	-0.780247	1	1	2.21264e-70	seurat_exp_2
38; C-type-lectin-receptor-signaling-pathway	C_type_lectin_receptor_signaling_pathway	IL12A	Th1 Th17 cell differentiation	1.85256e-72	0.719763	1	1	1.31346e-69	seurat_exp_2
102; C-type-lectin-receptor-signaling-pathway	C_type_lectin_receptor_signaling_pathway	IL10	Th1 Th17 cell differentiation	4.00652e-72	0.771665	1	1	2.84063e-69	seurat_exp_2
33; Ras-signaling-pathway	Ras_signaling_pathway	BCL2L1	Cell survival; Cell growth; Cell migration; Cell cycle progression; Transcription	1.76377e-71	-0.722902	1	1	1.25051e-68	seurat_exp_2
37; C-type-lectin-receptor-signaling-pathway	C_type_lectin_receptor_signaling_pathway	IL6	Th1 Th17 cell differentiation	3.38234e-71	0.776935	1	1	2.39808e-68	seurat_exp_2
101; C-type-lectin-receptor-signaling-pathway	C_type_lectin_receptor_signaling_pathway	TNF	Th1 Th17 cell differentiation	5.63369e-69	0.955777	1	1	3.99429e-66	seurat_exp_2
78; C-type-lectin-receptor-signaling-pathway	C_type_lectin_receptor_signaling_pathway	IL12A	Th1 Th17 cell differentiation	7.08876e-69	0.945189	1	1	5.02593e-66	seurat_exp_2
77; C-type-lectin-receptor-signaling-pathway	C_type_lectin_receptor_signaling_pathway	IL6	Th1 Th17 cell differentiation	3.16065e-68	1.0131	1	1	2.2409e-65	seurat_exp_2
76; C-type-lectin-receptor-signaling-pathway	C_type_lectin_receptor_signaling_pathway	IL23A	Th1 Th17 cell differentiation	5.26591e-68	0.909315	1	1	3.73353e-65	seurat_exp_2
27; JAK-STAT-signaling-pathway	JAK_STAT_signaling_pathway	PIM1	Anti-apoptosis	6.87032e-68	-0.56659	1	1	4.87106e-65	seurat_exp_2
39; HIF-1-signaling-pathway	HIF_1_signaling_pathway	C00002	ATP	2.31916e-66	1.10902	1	1	1.64428e-63	seurat_exp_2
32; TGF-beta-signaling-pathway	TGF_beta_signaling_pathway	RPS6KB1		3.04454e-65	-0.644419	1	1	2.15858e-62	seurat_exp_2
63; C-type-lectin-receptor-signaling-pathway	C_type_lectin_receptor_signaling_pathway	IL6	Th1 Th17 cell differentiation	2.43274e-64	0.905278	1	1	1.72481e-61	seurat_exp_2
62; C-type-lectin-receptor-signaling-pathway	C_type_lectin_receptor_signaling_pathway	IL23A	Th1 Th17 cell differentiation	4.5651e-64	0.849266	1	1	3.23666e-61	seurat_exp_2
132; EGFR-tyrosine-kinase-inhibitor-resistance	EGFR_tyrosine_kinase_inhibitor_resistance	EIF4E	Protein synthesis; Differentiation; Growth; Proliferation; Survival; Motility; Angiogenesis	1.68954e-63	-0.887842	1	1	1.19788e-60	seurat_exp_2
42; Fc-gamma-R-mediated-phagocytosis	Fc_gamma_R_mediated_phagocytosis	MYO10	Phagocytosis; Membrane remodeling; Focal exocytosis; Pseudopod extention; Particle internalization	2.13544e-63	0.625172	1	1	1.51403e-60	seurat_exp_2
161; Chemokine-signaling-pathway	Chemokine_signaling_pathway	BAD		3.67348e-59	0.61657	1	1	2.6045e-56	seurat_exp_2
28; VEGF-signaling-pathway	VEGF_signaling_pathway	SHC2		2.38868e-58	0.53309	1	1	1.69357e-55	seurat_exp_2
149; C-type-lectin-receptor-signaling-pathway	C_type_lectin_receptor_signaling_pathway	IL6	Th1 Th17 cell differentiation	7.05326e-58	-0.868736	1	1	5.00076e-55	seurat_exp_2
159; C-type-lectin-receptor-signaling-pathway	C_type_lectin_receptor_signaling_pathway	PTGS2	Th1 Th17 cell differentiation	1.11114e-57	-0.864597	1	1	7.87799e-55	seurat_exp_2
89; C-type-lectin-receptor-signaling-pathway	C_type_lectin_receptor_signaling_pathway	IL2	Th1 Th17 cell differentiation	8.98739e-56	-0.785333	1	1	6.37206e-53	seurat_exp_2
42; HIF-1-signaling-pathway	HIF_1_signaling_pathway	HK1	Reduce oxygen consumption; Promote anaerobic metabolism	1.5397e-55	-0.583972	1	1	1.09164e-52	seurat_exp_2
48; HIF-1-signaling-pathway	HIF_1_signaling_pathway	PFKFB3	Reduce oxygen consumption; Promote anaerobic metabolism	3.42705e-55	-0.643669	1	1	2.42978e-52	seurat_exp_2
113; cAMP-signaling-pathway	cAMP_signaling_pathway	PTCH1	Downregulation of Hedgehog signaling (embryonic fibroblast)	8.4811e-55	-0.523506	1	1	6.0131e-52	seurat_exp_2
86; Apoptosis	Apoptosis	BCL2L11	Pro-apoptotic genes	1.40291e-54	-1.3652	1	1	9.94661e-52	seurat_exp_2
164; C-type-lectin-receptor-signaling-pathway	C_type_lectin_receptor_signaling_pathway	EGR2	Th1 Th17 cell differentiation	1.4683e-54	-0.898118	1	1	1.04103e-51	seurat_exp_2
39; Insulin-signaling-pathway	Insulin_signaling_pathway	BAD	Antiapoptosis	1.94604e-53	0.540752	1	1	1.37975e-50	seurat_exp_2
31; ErbB-signaling-pathway	ErbB_signaling_pathway	BAD	Cell survival	3.06827e-53	0.507099	1	1	2.1754e-50	seurat_exp_2
157; C-type-lectin-receptor-signaling-pathway	C_type_lectin_receptor_signaling_pathway	IL10	Th1 Th17 cell differentiation	7.16403e-53	-0.768562	1	1	5.0793e-50	seurat_exp_2
85; Apoptosis	Apoptosis	FASLG	Pro-apoptotic genes	8.41774e-53	-1.25243	1	1	5.96818e-50	seurat_exp_2
7; Apoptosis	Apoptosis	ENDOG	DNA fragmentation; Apoptosis	1.5743e-51	0.786175	1	1	1.11618e-48	seurat_exp_2
54; AMPK-signaling-pathway	AMPK_signaling_pathway	SLC2A4	Activated mitochondrial biogeneses	2.27506e-51	-0.91258	1	1	1.61302e-48	seurat_exp_2
63; AMPK-signaling-pathway	AMPK_signaling_pathway	PPARG	Inhibited cell growth & protein synthesis	2.28684e-51	0.700613	1	1	1.62137e-48	seurat_exp_2
24; B-cell-receptor-signaling-pathway	B_cell_receptor_signaling_pathway	FOS	DNA; B cell ontogeny; Autoimmunity; Anergy; Immuno response Ig production GC formation	2.78365e-50	-0.927339	1	1	1.97361e-47	seurat_exp_2
182; NOD-like-receptor-signaling-pathway	NOD_like_receptor_signaling_pathway	C16054...		3.12415e-50	0.729673	1	1	2.21502e-47	seurat_exp_2
84; Apoptosis	Apoptosis	FAS	Pro-apoptotic genes	9.32284e-50	-1.3689	1	1	6.60989e-47	seurat_exp_2
83; Apoptosis	Apoptosis	TP53	Pro-apoptotic genes	2.18e-49	-1.50688	1	1	1.54562e-46	seurat_exp_2
43; HIF-1-signaling-pathway	HIF_1_signaling_pathway	PFKL	Reduce oxygen consumption; Promote anaerobic metabolism	2.68462e-47	-0.503782	1	1	1.9034e-44	seurat_exp_2
44; HIF-1-signaling-pathway	HIF_1_signaling_pathway	GAPDH	Reduce oxygen consumption; Promote anaerobic metabolism	2.68462e-47	-0.503782	1	1	1.9034e-44	seurat_exp_2
45; HIF-1-signaling-pathway	HIF_1_signaling_pathway	ALDOA	Reduce oxygen consumption; Promote anaerobic metabolism	2.68462e-47	-0.503782	1	1	1.9034e-44	seurat_exp_2
87; IL-17-signaling-pathway	IL_17_signaling_pathway	TNF	Inflammantory genes; Proinflammantory activities?	4.57607e-47	0.856727	1	1	3.24443e-44	seurat_exp_2
22; ErbB-signaling-pathway	ErbB_signaling_pathway	EIF4EBP1	Protein synthesis	1.63367e-46	0.610588	1	1	1.15828e-43	seurat_exp_2
46; HIF-1-signaling-pathway	HIF_1_signaling_pathway	ENO1	Reduce oxygen consumption; Promote anaerobic metabolism	2.60515e-45	-0.51642	1	1	1.84705e-42	seurat_exp_2
155; Chemokine-signaling-pathway	Chemokine_signaling_pathway	PXN	Migration	4.28982e-43	-0.699559	1	1	3.04149e-40	seurat_exp_2
31; Hedgehog-signaling-pathway	Hedgehog_signaling_pathway	GLI1	Respression of Hh target genes; Cell prolifeation tissue patterning stem cell maintenance, development, ect	8.15476e-43	-0.748837	1	1	5.78172e-40	seurat_exp_2
55; HIF-1-signaling-pathway	HIF_1_signaling_pathway	ANGPT1	Increase oxygen delivery; Angiogenesis	6.32137e-42	-0.54448	1	1	4.48185e-39	seurat_exp_2
56; ErbB-signaling-pathway	ErbB_signaling_pathway	JUN	DNA; Angiogenesis	8.24574e-39	-2.65053	1	1	5.84623e-36	seurat_exp_2
58; HIF-1-signaling-pathway	HIF_1_signaling_pathway	EDN1	Increase oxygen delivery; Vascular tone	1.46986e-38	-0.535541	1	1	1.04213e-35	seurat_exp_2
61; AMPK-signaling-pathway	AMPK_signaling_pathway	RPS6KB1	Inhibited cell growth & protein synthesis	4.98565e-38	0.50301	1	1	3.53482e-35	seurat_exp_2
18; mTOR-signaling-pathway	mTOR_signaling_pathway	RHOA	Cytoskeletal organization	1.53219e-37	0.562775	1	1	1.08632e-34	seurat_exp_2
40; TNF-signaling-pathway	TNF_signaling_pathway	JUN		1.05852e-36	-1.5164	1	1	7.50489e-34	seurat_exp_2
46; Cell-cycle	Cell_cycle	RB1		2.79854e-35	0.515796	1	1	1.98416e-32	seurat_exp_2
64; HIF-1-signaling-pathway	HIF_1_signaling_pathway	LTBR	Inflammantion	2.84965e-35	-0.526928	1	1	2.0204e-32	seurat_exp_2
48; Cell-cycle	Cell_cycle	RB1		8.25126e-34	0.530593	1	1	5.85014e-31	seurat_exp_2
34; TGF-beta-signaling-pathway	TGF_beta_signaling_pathway	ROCK1		1.67988e-33	-0.594502	1	1	1.19103e-30	seurat_exp_2
47; Chemokine-signaling-pathway	Chemokine_signaling_pathway	CRK		2.45441e-33	-0.510614	1	1	1.74017e-30	seurat_exp_2
57; p53-signaling-pathway	p53_signaling_pathway	CCNB1	G2 arrest( sustaines); Cell cycle arrest	7.11063e-33	0.615619	1	1	5.04143e-30	seurat_exp_2
35; ErbB-signaling-pathway	ErbB_signaling_pathway	CBL	Receptor ubiquitylation;Degradation	2.32989e-32	-1.11136	1	1	1.65189e-29	seurat_exp_2
50; C-type-lectin-receptor-signaling-pathway	C_type_lectin_receptor_signaling_pathway	IL17D	Tfh cell differentiation	3.135e-31	-1.75119	1	1	2.22271e-28	seurat_exp_2
52; HIF-1-signaling-pathway	HIF_1_signaling_pathway	FLT1	Increase oxygen delivery; Angiogenesis	9.34493e-30	-0.503618	1	1	6.62556e-27	seurat_exp_2
171; NOD-like-receptor-signaling-pathway	NOD_like_receptor_signaling_pathway	TNF	Pro-inflammatory cytokines	1.56127e-28	0.522999	1	1	1.10694e-25	seurat_exp_2
139; C-type-lectin-receptor-signaling-pathway	C_type_lectin_receptor_signaling_pathway	IL12A		1.20086e-27	0.559179	1	1	8.51407e-25	seurat_exp_2
55; MAPK-signaling-pathway	MAPK_signaling_pathway	ELK4	DNA; Proliferation differentiation, inflammation	1.37724e-27	-0.664293	1	1	9.76462e-25	seurat_exp_2
31; Complement-and-coagulation-cascades	Complement_and_coagulation_cascades	C6...	Membrane attack complex; Cell lysis	3.12114e-27	-0.875105	1	1	2.21289e-24	seurat_exp_2
169; NOD-like-receptor-signaling-pathway	NOD_like_receptor_signaling_pathway	IL18	Pro-inflammatory cytokines	4.3491e-26	0.641071	1	1	3.08351e-23	seurat_exp_2
175; NOD-like-receptor-signaling-pathway	NOD_like_receptor_signaling_pathway	CCL5	Chemokines	3.37284e-25	0.928943	1	1	2.39134e-22	seurat_exp_2
56; C-type-lectin-receptor-signaling-pathway	C_type_lectin_receptor_signaling_pathway	IL6	Th2 cell differentiation	1.59985e-24	0.677323	1	1	1.13429e-21	seurat_exp_2
70; Apoptosis	Apoptosis	CFLAR	Pro-survival genes	6.09282e-22	-1.0286	1	1	4.31981e-19	seurat_exp_2
5; PI3K-Akt-signaling-pathway	PI3K_Akt_signaling_pathway	EIF4B	Protein synthesis	1.65084e-21	0.500797	1	1	1.17045e-18	seurat_exp_2
4; PI3K-Akt-signaling-pathway	PI3K_Akt_signaling_pathway	RPS6	Protein synthesis	3.19939e-21	0.549001	1	1	2.26837e-18	seurat_exp_2
57; C-type-lectin-receptor-signaling-pathway	C_type_lectin_receptor_signaling_pathway	IL12A	Th2 cell differentiation	8.97354e-21	0.54111	1	1	6.36224e-18	seurat_exp_2
161; C-type-lectin-receptor-signaling-pathway	C_type_lectin_receptor_signaling_pathway	CCL17	Th2 cell differentiation	1.35163e-20	-1.35713	1	1	9.58306e-18	seurat_exp_2
22; C-type-lectin-receptor-signaling-pathway	C_type_lectin_receptor_signaling_pathway	IL23A	Th2 cell differentiation	3.21251e-20	0.536041	1	1	2.27767e-17	seurat_exp_2
55; C-type-lectin-receptor-signaling-pathway	C_type_lectin_receptor_signaling_pathway	IL10	Th2 cell differentiation	2.76053e-18	-1.26069	1	1	1.95722e-15	seurat_exp_2
160; C-type-lectin-receptor-signaling-pathway	C_type_lectin_receptor_signaling_pathway	CCL22	Th2 cell differentiation	3.00788e-18	-1.43202	1	1	2.13259e-15	seurat_exp_2
3; Apoptosis	Apoptosis	BCL2L1	Pro-survival genes	4.11517e-18	-0.873741	1	1	2.91765e-15	seurat_exp_2
12; T-cell-receptor-signaling-pathway	T_cell_receptor_signaling_pathway	IL2	Proliferation Differentation; Immuno response	7.39185e-18	-0.896797	1	1	5.24082e-15	seurat_exp_2
7; T-cell-receptor-signaling-pathway	T_cell_receptor_signaling_pathway	CSF2	Proliferation Differentation; Immuno response	9.83251e-18	-0.844288	1	1	6.97125e-15	seurat_exp_2
33; C-type-lectin-receptor-signaling-pathway	C_type_lectin_receptor_signaling_pathway	IL1B	Th1 Th17 cell differentiation	1.69243e-17	-4.5366	1	1	1.19993e-14	seurat_exp_2
8; T-cell-receptor-signaling-pathway	T_cell_receptor_signaling_pathway	IFNG	Proliferation Differentation; Immuno response	4.26615e-17	-0.821484	1	1	3.0247e-14	seurat_exp_2
67; Rap1-signaling-pathway	Rap1_signaling_pathway	AKT3	Proliferation survival gene activation	4.64053e-17	-0.720101	1	1	3.29013e-14	seurat_exp_2
9; T-cell-receptor-signaling-pathway	T_cell_receptor_signaling_pathway	IL10	Proliferation Differentation; Immuno response	8.45832e-17	-0.827388	1	1	5.99695e-14	seurat_exp_2
3; NF-kappa-B-signaling-pathway	NF_kappa_B_signaling_pathway	BCL2	Survival	2.36044e-16	-1.21572	1	1	1.67355e-13	seurat_exp_2
11; T-cell-receptor-signaling-pathway	T_cell_receptor_signaling_pathway	IL4	Proliferation Differentation; Immuno response	2.61075e-16	-0.762859	1	1	1.85102e-13	seurat_exp_2
172; NOD-like-receptor-signaling-pathway	NOD_like_receptor_signaling_pathway	CXCL8	Chemokines	9.8985e-16	-0.67163	1	1	7.01804e-13	seurat_exp_2
48; Rap1-signaling-pathway	Rap1_signaling_pathway	PARD3	Cell adhesion,migration,polarity	2.67604e-15	-0.772676	1	1	1.89731e-12	seurat_exp_2
10; T-cell-receptor-signaling-pathway	T_cell_receptor_signaling_pathway	IL5	Proliferation Differentation; Immuno response	3.05175e-14	-0.729955	1	1	2.16369e-11	seurat_exp_2
57; Complement-and-coagulation-cascades	Complement_and_coagulation_cascades	PLAUR	Cell adhesion,migration,proliferation	3.1583e-13	-0.684213	1	1	2.23924e-10	seurat_exp_2
43; ErbB-signaling-pathway	ErbB_signaling_pathway	PTK2	Adhesion Migration	4.9064e-12	-1.48233	1	1	3.47863e-09	seurat_exp_2
6; T-cell-receptor-signaling-pathway	T_cell_receptor_signaling_pathway	TNF	Proliferation Differentation; Immuno response	2.99955e-10	-0.883027	1	1	2.12668e-07	seurat_exp_2
69; Apoptosis	Apoptosis	PTPN13	Pro-survival genes	1.56179e-09	-0.838419	1	1	1.10731e-06	seurat_exp_2
148; C-type-lectin-receptor-signaling-pathway	C_type_lectin_receptor_signaling_pathway	IL1B	Th1 Th17 cell differentiation	2.90373e-09	-1.49211	1	1	2.05874e-06	seurat_exp_2
137; NF-kappa-B-signaling-pathway	NF_kappa_B_signaling_pathway	ICAM1	Lymphocyte adhesion, T-cell costimulation	9.66219e-09	-1.38508	1	1	6.85049e-06	seurat_exp_2
82; Rap1-signaling-pathway	Rap1_signaling_pathway	ITGA2B	Cell adhesion,migration,polarity	1.27023e-08	-0.683853	1	1	9.00592e-06	seurat_exp_2
54; NF-kappa-B-signaling-pathway	NF_kappa_B_signaling_pathway	CCL13	Lymphoid-tissue homing	6.47358e-08	-0.787319	1	1	4.58977e-05	seurat_exp_2
47; ErbB-signaling-pathway	ErbB_signaling_pathway	PRKCA	Cellular targets	6.70531e-08	-1.7343	1	1	4.75407e-05	seurat_exp_2
132; NF-kappa-B-signaling-pathway	NF_kappa_B_signaling_pathway	VCAM1	Inflammation	7.64762e-08	-2.03494	1	1	5.42216e-05	seurat_exp_2
20; NOD-like-receptor-signaling-pathway	NOD_like_receptor_signaling_pathway	IL18		4.162e-07	-0.751049	1	1	0.000295086	seurat_exp_2
23; ErbB-signaling-pathway	ErbB_signaling_pathway	RPS6KB1	Protein synthesis	8.79586e-07	-0.827025	1	1	0.000623627	seurat_exp_2
74; PPAR-signaling-pathway	PPAR_signaling_pathway	DBI	Fatty acid transport; Lipid metabolism	1.05023e-06	-0.679664	1	1	0.000744614	seurat_exp_2
135; NF-kappa-B-signaling-pathway	NF_kappa_B_signaling_pathway	CCL19	Lymphoid-tissue homing	1.69442e-06	-3.50686	1	1	0.00120134	seurat_exp_2
95; Rap1-signaling-pathway	Rap1_signaling_pathway	THBS1	Defective angiogensis	7.27489e-06	-0.764021	1	1	0.0051579	seurat_exp_2
4; NF-kappa-B-signaling-pathway	NF_kappa_B_signaling_pathway	BIRC2	Survival	6.11712e-05	-2.46736	1	1	0.0433704	seurat_exp_2
16; cGMP-PKG-signaling-pathway	cGMP_PKG_signaling_pathway	MYL9	Smooth muscle relaxation	1.19185e-66	-0.551945	1	1	8.45023e-64	seurat_exp_3
54; AMPK-signaling-pathway	AMPK_signaling_pathway	SLC2A4	Activated mitochondrial biogeneses	1.38274e-66	0.990618	1	1	9.80365e-64	seurat_exp_3
126; Endocrine-resistance	Endocrine_resistance	FOS	DNA; Transcription Proliferation	2.76024e-60	-1.85811	1	1	1.95701e-57	seurat_exp_3
7; ErbB-signaling-pathway	ErbB_signaling_pathway	ERBB3	No signaling	2.58216e-56	0.728227	1	1	1.83075e-53	seurat_exp_3
24; JAK-STAT-signaling-pathway	JAK_STAT_signaling_pathway	MCL1	Anti-apoptosis	2.79175e-56	-0.735772	1	1	1.97935e-53	seurat_exp_3
38; TNF-signaling-pathway	TNF_signaling_pathway	CEBPB		1.4583e-55	-1.06413	1	1	1.03393e-52	seurat_exp_3
119; MAPK-signaling-pathway	MAPK_signaling_pathway	FOS	DNA; Proliferation differentiation	5.23477e-55	-1.25439	1	1	3.71145e-52	seurat_exp_3
83; Apoptosis	Apoptosis	TP53	Pro-apoptotic genes	4.85745e-54	-1.60537	1	1	3.44393e-51	seurat_exp_3
108; MAPK-signaling-pathway	MAPK_signaling_pathway	JUN	DNA; Proliferation differentiation, inflammation	7.54502e-53	-0.932383	1	1	5.34942e-50	seurat_exp_3
40; TNF-signaling-pathway	TNF_signaling_pathway	JUN		7.92504e-53	-1.73685	1	1	5.61885e-50	seurat_exp_3
118; cAMP-signaling-pathway	cAMP_signaling_pathway	MYL9	Relaxation (endothelial cell, smooth muscle cell)	2.00122e-52	-0.883135	1	1	1.41886e-49	seurat_exp_3
35; Wnt-signaling-pathway	Wnt_signaling_pathway	JUN		5.56924e-52	-0.771749	1	1	3.94859e-49	seurat_exp_3
38; IL-17-signaling-pathway	IL_17_signaling_pathway	CEBPB		4.35977e-51	-0.670952	1	1	3.09108e-48	seurat_exp_3
107; MAPK-signaling-pathway	MAPK_signaling_pathway	JUND	DNA; Proliferation differentiation, inflammation	5.6155e-51	-0.784155	1	1	3.98139e-48	seurat_exp_3
86; Apoptosis	Apoptosis	BCL2L11	Pro-apoptotic genes	2.01907e-49	-1.43952	1	1	1.43152e-46	seurat_exp_3
56; ErbB-signaling-pathway	ErbB_signaling_pathway	JUN	DNA; Angiogenesis	2.31984e-49	-2.68898	1	1	1.64476e-46	seurat_exp_3
85; Apoptosis	Apoptosis	FASLG	Pro-apoptotic genes	1.27769e-47	-1.36038	1	1	9.05879e-45	seurat_exp_3
24; B-cell-receptor-signaling-pathway	B_cell_receptor_signaling_pathway	FOS	DNA; B cell ontogeny; Autoimmunity; Anergy; Immuno response Ig production GC formation	3.56823e-47	-0.933737	1	1	2.52987e-44	seurat_exp_3
125; Endocrine-resistance	Endocrine_resistance	JUN	DNA; Transcription Proliferation	1.02135e-46	-1.53544	1	1	7.24136e-44	seurat_exp_3
93; NF-kappa-B-signaling-pathway	NF_kappa_B_signaling_pathway	PLAU	Survival	2.04123e-46	-0.835087	1	1	1.44723e-43	seurat_exp_3
69; MAPK-signaling-pathway	MAPK_signaling_pathway	HSPB1	DNA; Proliferation differentiation, inflammation	1.11425e-45	-1.34168	1	1	7.90001e-43	seurat_exp_3
50; HIF-1-signaling-pathway	HIF_1_signaling_pathway	TF	Increase oxygen delivery; Iron metabolism	5.9501e-45	0.547068	1	1	4.21862e-42	seurat_exp_3
84; Apoptosis	Apoptosis	FAS	Pro-apoptotic genes	1.1874e-44	-1.42533	1	1	8.41867e-42	seurat_exp_3
142; NF-kappa-B-signaling-pathway	NF_kappa_B_signaling_pathway	NFKB2	Activation of noncanonical pathway	3.63858e-44	-3.86913	1	1	2.57975e-41	seurat_exp_3
164; cGMP-PKG-signaling-pathway	cGMP_PKG_signaling_pathway	PPIF	Cardioprotection	6.02689e-44	-1.35159	1	1	4.27306e-41	seurat_exp_3
174; NOD-like-receptor-signaling-pathway	NOD_like_receptor_signaling_pathway	CCL2	Chemokines	1.01654e-43	-1.33766	1	1	7.20727e-41	seurat_exp_3
44; Fc-gamma-R-mediated-phagocytosis	Fc_gamma_R_mediated_phagocytosis	GSN	Phagocytosis; Membrane traficking; Particle internalization; Phagosome closure; Phagosome-lysosome fusion	3.91027e-43	-0.983943	1	1	2.77238e-40	seurat_exp_3
97; PI3K-Akt-signaling-pathway	PI3K_Akt_signaling_pathway	MCL1	Cell survival	7.58313e-43	-0.657582	1	1	5.37644e-40	seurat_exp_3
53; NF-kappa-B-signaling-pathway	NF_kappa_B_signaling_pathway	CXCL8	Survival	4.69969e-42	-4.58669	1	1	3.33208e-39	seurat_exp_3
50; NF-kappa-B-signaling-pathway	NF_kappa_B_signaling_pathway	NFKBIA	Negative feedback	1.57934e-41	-4.50027	1	1	1.11975e-38	seurat_exp_3
110; cAMP-signaling-pathway	cAMP_signaling_pathway	FOS	Hyperexcitability cell death/survival(hippocampal neuron)	1.66593e-41	-0.96484	1	1	1.18115e-38	seurat_exp_3
121; Chemokine-signaling-pathway	Chemokine_signaling_pathway	NFKB1	DNA; Cytokine production; Cellular gowth and differentiation; Cell survival; Migration; Apoptosis	8.99371e-41	-0.886606	1	1	6.37654e-38	seurat_exp_3
51; NF-kappa-B-signaling-pathway	NF_kappa_B_signaling_pathway	TNFAIP3	Negative feedback	1.81982e-40	-4.25446	1	1	1.29025e-37	seurat_exp_3
128; NF-kappa-B-signaling-pathway	NF_kappa_B_signaling_pathway	IL1B	Positive feedback	6.16631e-40	-4.2281	1	1	4.37191e-37	seurat_exp_3
2; NF-kappa-B-signaling-pathway	NF_kappa_B_signaling_pathway	BCL2L1	Survival	1.04556e-39	-3.03416	1	1	7.413e-37	seurat_exp_3
113; NF-kappa-B-signaling-pathway	NF_kappa_B_signaling_pathway	CFLAR	Survival	1.39434e-39	-3.26547	1	1	9.88584e-37	seurat_exp_3
129; NF-kappa-B-signaling-pathway	NF_kappa_B_signaling_pathway	PTGS2	Inflammation	2.88868e-39	-3.39301	1	1	2.04808e-36	seurat_exp_3
132; NF-kappa-B-signaling-pathway	NF_kappa_B_signaling_pathway	VCAM1	Inflammation	9.62753e-39	-3.57279	1	1	6.82592e-36	seurat_exp_3
131; NF-kappa-B-signaling-pathway	NF_kappa_B_signaling_pathway	CCL4L1	Inflammation	1.92013e-38	-3.62554	1	1	1.36137e-35	seurat_exp_3
133; NF-kappa-B-signaling-pathway	NF_kappa_B_signaling_pathway	CXCL2	Inflammation	3.17702e-38	-3.00274	1	1	2.25251e-35	seurat_exp_3
168; C-type-lectin-receptor-signaling-pathway	C_type_lectin_receptor_signaling_pathway	IL12A	Th1 Th17 cell differentiation	3.79058e-38	-2.29105	1	1	2.68752e-35	seurat_exp_3
114; NF-kappa-B-signaling-pathway	NF_kappa_B_signaling_pathway	BCL2A1	Survival	3.81294e-38	-3.51934	1	1	2.70337e-35	seurat_exp_3
172; NOD-like-receptor-signaling-pathway	NOD_like_receptor_signaling_pathway	CXCL8	Chemokines	4.84885e-38	-1.79995	1	1	3.43784e-35	seurat_exp_3
145; Endocrine-resistance	Endocrine_resistance	FOS	DNA; CoA overexpression AP1/SP1 overexpression; Transcription Proliferation	5.34025e-38	-1.16896	1	1	3.78624e-35	seurat_exp_3
116; NF-kappa-B-signaling-pathway	NF_kappa_B_signaling_pathway	GADD45B	Survival	5.65935e-38	-3.39819	1	1	4.01248e-35	seurat_exp_3
130; NF-kappa-B-signaling-pathway	NF_kappa_B_signaling_pathway	TNF	Positive feedback	3.20339e-37	-3.46986	1	1	2.2712e-34	seurat_exp_3
4; NF-kappa-B-signaling-pathway	NF_kappa_B_signaling_pathway	BIRC2	Survival	2.21468e-36	-3.93404	1	1	1.57021e-33	seurat_exp_3
94; NF-kappa-B-signaling-pathway	NF_kappa_B_signaling_pathway	BCL2L1	Survival	2.76009e-36	-0.641479	1	1	1.95691e-33	seurat_exp_3
38; Fc-gamma-R-mediated-phagocytosis	Fc_gamma_R_mediated_phagocytosis	CFL1	Phagocytosis; Membrane traficking; Particle internalization; Phagosome closure; Phagosome-lysosome fusion	4.50418e-36	0.623205	1	1	3.19346e-33	seurat_exp_3
107; Apoptosis	Apoptosis	MCL1	Bim-mediated mitochondrial apoptotic events; Apoptosis	5.97015e-36	-0.555045	1	1	4.23284e-33	seurat_exp_3
112; cAMP-signaling-pathway	cAMP_signaling_pathway	GLI1	Downregulation of Hedgehog signaling (embryonic fibroblast)	4.90755e-35	-0.513836	1	1	3.47945e-32	seurat_exp_3
141; TNF-signaling-pathway	TNF_signaling_pathway	JUN	Cell survival	5.49772e-35	-0.759412	1	1	3.89788e-32	seurat_exp_3
21; Toll-like-receptor-signaling-pathway	Toll_like_receptor_signaling_pathway	IFNA1	Antiviral effects	5.8375e-35	-0.956466	1	1	4.13879e-32	seurat_exp_3
175; NOD-like-receptor-signaling-pathway	NOD_like_receptor_signaling_pathway	CCL5	Chemokines	5.91751e-35	-1.3782	1	1	4.19552e-32	seurat_exp_3
114; Apoptosis	Apoptosis	HRK	Pro-apoptotic genes	6.10239e-35	-1.09842	1	1	4.32659e-32	seurat_exp_3
52; NF-kappa-B-signaling-pathway	NF_kappa_B_signaling_pathway	TRAF1	Survival	1.26142e-34	-3.86545	1	1	8.94345e-32	seurat_exp_3
178; NOD-like-receptor-signaling-pathway	NOD_like_receptor_signaling_pathway	IL1B	Pro-inflammatory cytokines	2.02173e-34	-1.5923	1	1	1.43341e-31	seurat_exp_3
95; NF-kappa-B-signaling-pathway	NF_kappa_B_signaling_pathway	BCL2L1	Survival	5.77854e-34	-0.655166	1	1	4.09698e-31	seurat_exp_3
96; NF-kappa-B-signaling-pathway	NF_kappa_B_signaling_pathway	BCL2A1	Survival	5.87606e-34	-0.771318	1	1	4.16612e-31	seurat_exp_3
6; B-cell-receptor-signaling-pathway	B_cell_receptor_signaling_pathway	NFKB1	DNA; B cell ontogeny; Autoimmunity; Anergy; Immuno response Ig production GC formation	2.61638e-33	-1.92822	1	1	1.85502e-30	seurat_exp_3
173; NOD-like-receptor-signaling-pathway	NOD_like_receptor_signaling_pathway	CXCL1	Chemokines	4.06726e-33	-1.15587	1	1	2.88368e-30	seurat_exp_3
27; p53-signaling-pathway	p53_signaling_pathway	THBS1	Inflammhibition of angiogenesis and metastasis	5.85204e-33	-0.618381	1	1	4.1491e-30	seurat_exp_3
170; NOD-like-receptor-signaling-pathway	NOD_like_receptor_signaling_pathway	IL6	Pro-inflammatory cytokines	7.90609e-33	-1.23846	1	1	5.60542e-30	seurat_exp_3
169; NOD-like-receptor-signaling-pathway	NOD_like_receptor_signaling_pathway	IL18	Pro-inflammatory cytokines	1.38246e-32	-0.98825	1	1	9.80166e-30	seurat_exp_3
3; NF-kappa-B-signaling-pathway	NF_kappa_B_signaling_pathway	BCL2	Survival	1.92424e-32	-2.6139	1	1	1.36428e-29	seurat_exp_3
29; Toll-like-receptor-signaling-pathway	Toll_like_receptor_signaling_pathway	CXCL8	Chemotactic effects ( Nutrophil, Immature DC )( NK cell )	3.04914e-32	-1.59452	1	1	2.16184e-29	seurat_exp_3
183; NOD-like-receptor-signaling-pathway	NOD_like_receptor_signaling_pathway	CAMP	Antimicrobial peptides; Defensins	7.06005e-32	-0.877718	1	1	5.00558e-29	seurat_exp_3
69; Apoptosis	Apoptosis	PTPN13	Pro-survival genes	1.02105e-31	-1.23506	1	1	7.23926e-29	seurat_exp_3
171; NOD-like-receptor-signaling-pathway	NOD_like_receptor_signaling_pathway	TNF	Pro-inflammatory cytokines	2.97088e-31	-1.05307	1	1	2.10636e-28	seurat_exp_3
27; Fc-gamma-R-mediated-phagocytosis	Fc_gamma_R_mediated_phagocytosis	ARPC5	Phagocytosis; Membrane traficking; Particle internalization; Phagosome closure; Phagosome-lysosome fusion	6.24939e-31	-1.22729	1	1	4.43082e-28	seurat_exp_3
55; NF-kappa-B-signaling-pathway	NF_kappa_B_signaling_pathway	CXCL12	Myeloiesis and B-cell lymphopoieses	1.22546e-30	-1.54977	1	1	8.68852e-28	seurat_exp_3
77; Hippo-signaling-pathway	Hippo_signaling_pathway	CCND1	Anti-apoptotic genes; Pro-proliferation genes	2.19142e-30	-0.886521	1	1	1.55371e-27	seurat_exp_3
14; Cytosolic-DNA-sensing-pathway	Cytosolic_DNA_sensing_pathway	CXCL10	Pro-inflammatory cytokines and chemokines	9.79226e-30	-1.21547	1	1	6.94272e-27	seurat_exp_3
79; Hippo-signaling-pathway	Hippo_signaling_pathway	SNAI2	Anti-apoptotic genes; Pro-proliferation genes	2.55627e-29	-0.762402	1	1	1.8124e-26	seurat_exp_3
138; TNF-signaling-pathway	TNF_signaling_pathway	NFKB1	Degradation; Cell survival	2.57332e-29	-1.45481	1	1	1.82448e-26	seurat_exp_3
70; Apoptosis	Apoptosis	CFLAR	Pro-survival genes	2.8464e-29	-1.25627	1	1	2.0181e-26	seurat_exp_3
3; Apoptosis	Apoptosis	BCL2L1	Pro-survival genes	4.14357e-29	-1.10814	1	1	2.93779e-26	seurat_exp_3
88; Hippo-signaling-pathway	Hippo_signaling_pathway	ID1	Anti-apoptotic genes; Pro-proliferation genes	6.70998e-29	-0.75705	1	1	4.75738e-26	seurat_exp_3
72; Apoptosis	Apoptosis	BCL2A1	Pro-survival genes	9.54631e-29	-1.3281	1	1	6.76834e-26	seurat_exp_3
71; Apoptosis	Apoptosis	GADD45G	Pro-survival genes	1.14023e-28	-1.07471	1	1	8.08427e-26	seurat_exp_3
115; NF-kappa-B-signaling-pathway	NF_kappa_B_signaling_pathway	XIAP	Survival	2.01754e-28	-2.81799	1	1	1.43043e-25	seurat_exp_3
79; C-type-lectin-receptor-signaling-pathway	C_type_lectin_receptor_signaling_pathway	IL1B	Th1 Th17 cell differentiation	4.8724e-28	-1.08735	1	1	3.45453e-25	seurat_exp_3
35; ErbB-signaling-pathway	ErbB_signaling_pathway	CBL	Receptor ubiquitylation;Degradation	2.65718e-27	-1.61306	1	1	1.88394e-24	seurat_exp_3
34; Toll-like-receptor-signaling-pathway	Toll_like_receptor_signaling_pathway	IL1B	Inflammatory cytokines;Proinflammatory effects	3.19612e-27	-1.21147	1	1	2.26605e-24	seurat_exp_3
21; TGF-beta-signaling-pathway	TGF_beta_signaling_pathway	CDKN2B	G1 arrest	5.60204e-27	-0.543875	1	1	3.97185e-24	seurat_exp_3
40; Toll-like-receptor-signaling-pathway	Toll_like_receptor_signaling_pathway	CCL5	Chemotactic effects ( Nutrophil, Immature DC )( NK cell )	6.66985e-27	-1.17019	1	1	4.72893e-24	seurat_exp_3
60; Hippo-signaling-pathway	Hippo_signaling_pathway	CTGF	Anti-apoptotic genes; Pro-proliferation genes	2.16849e-26	-0.920457	1	1	1.53746e-23	seurat_exp_3
77; C-type-lectin-receptor-signaling-pathway	C_type_lectin_receptor_signaling_pathway	IL6	Th1 Th17 cell differentiation	2.50566e-26	-0.879806	1	1	1.77651e-23	seurat_exp_3
37; C-type-lectin-receptor-signaling-pathway	C_type_lectin_receptor_signaling_pathway	IL6	Th1 Th17 cell differentiation	6.45937e-26	-0.828549	1	1	4.5797e-23	seurat_exp_3
49; RIG-I-like-receptor-signaling-pathway	RIG_I_like_receptor_signaling_pathway	IFNE	Type 1 interfeons; Protein synthesis; Growth arrest; Dendrition cell activation; NK cell activation; Antibody production; Apoptosis	1.22032e-25	-1.09979	1	1	8.65206e-23	seurat_exp_3
51; RIG-I-like-receptor-signaling-pathway	RIG_I_like_receptor_signaling_pathway	CXCL8	Inflammatory cytokines; Protein synthesis; Growth arrest; Dendrition cell activation; NK cell activation; Antibody production; Apoptosis	1.88279e-25	-1.50074	1	1	1.3349e-22	seurat_exp_3
7; T-cell-receptor-signaling-pathway	T_cell_receptor_signaling_pathway	CSF2	Proliferation Differentation; Immuno response	1.93292e-25	-1.24182	1	1	1.37044e-22	seurat_exp_3
64; C-type-lectin-receptor-signaling-pathway	C_type_lectin_receptor_signaling_pathway	IL1B	Th1 Th17 cell differentiation	1.95641e-25	-1.20968	1	1	1.38709e-22	seurat_exp_3
50; C-type-lectin-receptor-signaling-pathway	C_type_lectin_receptor_signaling_pathway	IL17D	Tfh cell differentiation	2.05615e-25	-2.59473	1	1	1.45781e-22	seurat_exp_3
38; C-type-lectin-receptor-signaling-pathway	C_type_lectin_receptor_signaling_pathway	IL12A	Th1 Th17 cell differentiation	2.3071e-25	-0.741033	1	1	1.63573e-22	seurat_exp_3
78; C-type-lectin-receptor-signaling-pathway	C_type_lectin_receptor_signaling_pathway	IL12A	Th1 Th17 cell differentiation	2.53253e-25	-0.814921	1	1	1.79556e-22	seurat_exp_3
76; C-type-lectin-receptor-signaling-pathway	C_type_lectin_receptor_signaling_pathway	IL23A	Th1 Th17 cell differentiation	4.19186e-25	-0.843884	1	1	2.97203e-22	seurat_exp_3
54; RIG-I-like-receptor-signaling-pathway	RIG_I_like_receptor_signaling_pathway	CXCL10	Inflammatory cytokines; Protein synthesis; Growth arrest; Dendrition cell activation; NK cell activation; Antibody production; Apoptosis	4.30231e-25	-2.98354	1	1	3.05034e-22	seurat_exp_3
76; Toll-like-receptor-signaling-pathway	Toll_like_receptor_signaling_pathway	CCL3L3	Chemotactic effects ( Nutrophil, Immature DC )( NK cell )	4.73686e-25	-0.841417	1	1	3.35843e-22	seurat_exp_3
15; MAPK-signaling-pathway	MAPK_signaling_pathway	NFKB1	Proliferation inflammation anti-apoptosis	4.78191e-25	-0.85356	1	1	3.39038e-22	seurat_exp_3
8; T-cell-receptor-signaling-pathway	T_cell_receptor_signaling_pathway	IFNG	Proliferation Differentation; Immuno response	5.04865e-25	-1.28865	1	1	3.57949e-22	seurat_exp_3
39; Toll-like-receptor-signaling-pathway	Toll_like_receptor_signaling_pathway	IL6	Inflammatory cytokines;Proinflammatory effects	6.8145e-25	-0.907777	1	1	4.83148e-22	seurat_exp_3
33; Cytosolic-DNA-sensing-pathway	Cytosolic_DNA_sensing_pathway	CCL5	Pro-inflammatory cytokines and chemokines	1.02837e-24	-0.856226	1	1	7.29115e-22	seurat_exp_3
50; RIG-I-like-receptor-signaling-pathway	RIG_I_like_receptor_signaling_pathway	IFNK	Type 1 interfeons; Protein synthesis; Growth arrest; Dendrition cell activation; NK cell activation; Antibody production; Apoptosis	1.11962e-24	-1.20536	1	1	7.93807e-22	seurat_exp_3
10; T-cell-receptor-signaling-pathway	T_cell_receptor_signaling_pathway	IL5	Proliferation Differentation; Immuno response	1.16113e-24	-1.18644	1	1	8.23238e-22	seurat_exp_3
73; Apoptosis	Apoptosis	TRAF1	Pro-survival genes	1.89717e-24	-1.26818	1	1	1.34509e-21	seurat_exp_3
86; Toll-like-receptor-signaling-pathway	Toll_like_receptor_signaling_pathway	IL12A	Inflammatory cytokines;Proinflammatory effects	1.99678e-24	-0.799752	1	1	1.41571e-21	seurat_exp_3
63; C-type-lectin-receptor-signaling-pathway	C_type_lectin_receptor_signaling_pathway	IL6	Th1 Th17 cell differentiation	2.42489e-24	-0.950249	1	1	1.71925e-21	seurat_exp_3
6; T-cell-receptor-signaling-pathway	T_cell_receptor_signaling_pathway	TNF	Proliferation Differentation; Immuno response	2.77831e-24	-1.46631	1	1	1.96982e-21	seurat_exp_3
18; RIG-I-like-receptor-signaling-pathway	RIG_I_like_receptor_signaling_pathway	IFNA1	Type 1 interfeons; Protein synthesis; Growth arrest; Dendrition cell activation; NK cell activation; Antibody production; Apoptosis	3.56275e-24	-1.09636	1	1	2.52599e-21	seurat_exp_3
56; MAPK-signaling-pathway	MAPK_signaling_pathway	TP53	p53 signaling pathway; Proliferation differentiation, inflammation	4.58083e-24	-0.788142	1	1	3.24781e-21	seurat_exp_3
12; p53-signaling-pathway	p53_signaling_pathway	CCNE1	G1 arrest( sustaines); Cell cycle arrest	5.44493e-24	0.550062	1	1	3.86046e-21	seurat_exp_3
10; Apoptosis	Apoptosis	BIRC2	Pro-survival genes	5.6264e-24	-1.15939	1	1	3.98912e-21	seurat_exp_3
48; RIG-I-like-receptor-signaling-pathway	RIG_I_like_receptor_signaling_pathway	IFNW1	Type 1 interfeons; Protein synthesis; Growth arrest; Dendrition cell activation; NK cell activation; Antibody production; Apoptosis	5.91089e-24	-1.14087	1	1	4.19082e-21	seurat_exp_3
87; Toll-like-receptor-signaling-pathway	Toll_like_receptor_signaling_pathway	CCL4L1	Chemotactic effects ( Nutrophil, Immature DC )( NK cell )	6.85354e-24	-0.874871	1	1	4.85916e-21	seurat_exp_3
102; C-type-lectin-receptor-signaling-pathway	C_type_lectin_receptor_signaling_pathway	IL10	Th1 Th17 cell differentiation	7.06044e-24	-0.729072	1	1	5.00585e-21	seurat_exp_3
149; C-type-lectin-receptor-signaling-pathway	C_type_lectin_receptor_signaling_pathway	IL6	Th1 Th17 cell differentiation	7.90361e-24	-2.64859	1	1	5.60366e-21	seurat_exp_3
11; T-cell-receptor-signaling-pathway	T_cell_receptor_signaling_pathway	IL4	Proliferation Differentation; Immuno response	8.59986e-24	-1.16266	1	1	6.0973e-21	seurat_exp_3
9; T-cell-receptor-signaling-pathway	T_cell_receptor_signaling_pathway	IL10	Proliferation Differentation; Immuno response	1.13349e-23	-1.25398	1	1	8.03641e-21	seurat_exp_3
111; cAMP-signaling-pathway	cAMP_signaling_pathway	JUN	Hyperexcitability cell death/survival(hippocampal neuron)	2.58073e-23	-0.587649	1	1	1.82974e-20	seurat_exp_3
139; C-type-lectin-receptor-signaling-pathway	C_type_lectin_receptor_signaling_pathway	IL12A		2.64743e-23	0.503622	1	1	1.87703e-20	seurat_exp_3
22; Cytosolic-DNA-sensing-pathway	Cytosolic_DNA_sensing_pathway	IL6	Pro-inflammatory cytokines and chemokines	2.82729e-23	-0.543427	1	1	2.00455e-20	seurat_exp_3
19; RIG-I-like-receptor-signaling-pathway	RIG_I_like_receptor_signaling_pathway	IFNB1	Type 1 interfeons; Protein synthesis; Growth arrest; Dendrition cell activation; NK cell activation; Antibody production; Apoptosis	5.40643e-23	-1.091	1	1	3.83316e-20	seurat_exp_3
101; C-type-lectin-receptor-signaling-pathway	C_type_lectin_receptor_signaling_pathway	TNF	Th1 Th17 cell differentiation	5.46202e-23	-0.911801	1	1	3.87257e-20	seurat_exp_3
61; HIF-1-signaling-pathway	HIF_1_signaling_pathway	HMOX1	Increase oxygen delivery; Vascular tone	7.56691e-23	-0.734134	1	1	5.36494e-20	seurat_exp_3
62; C-type-lectin-receptor-signaling-pathway	C_type_lectin_receptor_signaling_pathway	IL23A	Th1 Th17 cell differentiation	8.17051e-23	-0.874808	1	1	5.79289e-20	seurat_exp_3
173; C-type-lectin-receptor-signaling-pathway	C_type_lectin_receptor_signaling_pathway	C00584	Th1 Th17 cell differentiation	8.35405e-23	-1.68791	1	1	5.92302e-20	seurat_exp_3
12; T-cell-receptor-signaling-pathway	T_cell_receptor_signaling_pathway	IL2	Proliferation Differentation; Immuno response	1.00417e-22	-1.24894	1	1	7.11959e-20	seurat_exp_3
129; C-type-lectin-receptor-signaling-pathway	C_type_lectin_receptor_signaling_pathway	IL12A	Th1 Th17 cell differentiation	1.05638e-22	-1.69073	1	1	7.48977e-20	seurat_exp_3
46; Toll-like-receptor-signaling-pathway	Toll_like_receptor_signaling_pathway	TNF	Inflammatory cytokines;Proinflammatory effects	1.14092e-22	-0.840583	1	1	8.08911e-20	seurat_exp_3
88; C-type-lectin-receptor-signaling-pathway	C_type_lectin_receptor_signaling_pathway	IL23A	Th1 Th17 cell differentiation	1.55991e-22	-1.93719	1	1	1.10598e-19	seurat_exp_3
32; Cytosolic-DNA-sensing-pathway	Cytosolic_DNA_sensing_pathway	CCL4L1	Pro-inflammatory cytokines and chemokines	2.62667e-22	-0.53627	1	1	1.86231e-19	seurat_exp_3
156; C-type-lectin-receptor-signaling-pathway	C_type_lectin_receptor_signaling_pathway	IL10	Th1 Th17 cell differentiation	9.38952e-22	-2.0134	1	1	6.65717e-19	seurat_exp_3
54; Chemokine-signaling-pathway	Chemokine_signaling_pathway	ROCK1		1.43382e-21	-0.589404	1	1	1.01658e-18	seurat_exp_3
103; Chemokine-signaling-pathway	Chemokine_signaling_pathway	PAK1		6.10005e-21	-0.882248	1	1	4.32494e-18	seurat_exp_3
59; Ras-signaling-pathway	Ras_signaling_pathway	STK4	Apoptosis; Cell-cycle arrest	6.3248e-21	-0.771915	1	1	4.48428e-18	seurat_exp_3
166; TNF-signaling-pathway	TNF_signaling_pathway	IFNB1		1.01929e-20	-0.55415	1	1	7.22678e-18	seurat_exp_3
20; Toll-like-receptor-signaling-pathway	Toll_like_receptor_signaling_pathway	IFNB1	Antiviral effects	1.32271e-20	-0.842115	1	1	9.37804e-18	seurat_exp_3
7; Apoptosis	Apoptosis	ENDOG	DNA fragmentation; Apoptosis	2.56155e-20	0.548031	1	1	1.81614e-17	seurat_exp_3
79; Ras-signaling-pathway	Ras_signaling_pathway	RAC1	Cell spreading and migration	3.48394e-20	-0.520164	1	1	2.47011e-17	seurat_exp_3
57; HIF-1-signaling-pathway	HIF_1_signaling_pathway	TIMP1	Increase oxygen delivery; Angiogenesis	4.30465e-20	-0.717782	1	1	3.052e-17	seurat_exp_3
63; HIF-1-signaling-pathway	HIF_1_signaling_pathway	TIMP1	Matrix and barrier functions	4.30465e-20	-0.717782	1	1	3.052e-17	seurat_exp_3
182; NOD-like-receptor-signaling-pathway	NOD_like_receptor_signaling_pathway	C16054...		5.30612e-20	-0.758416	1	1	3.76204e-17	seurat_exp_3
137; NF-kappa-B-signaling-pathway	NF_kappa_B_signaling_pathway	ICAM1	Lymphocyte adhesion, T-cell costimulation	1.54123e-19	-3.42037	1	1	1.09273e-16	seurat_exp_3
63; Complement-and-coagulation-cascades	Complement_and_coagulation_cascades	ITGAX	Phagocytosis	5.58238e-19	-1.78384	1	1	3.95791e-16	seurat_exp_3
34; TGF-beta-signaling-pathway	TGF_beta_signaling_pathway	ROCK1		5.69934e-19	-0.57229	1	1	4.04083e-16	seurat_exp_3
53; RIG-I-like-receptor-signaling-pathway	RIG_I_like_receptor_signaling_pathway	IL12A	Inflammatory cytokines; Protein synthesis; Growth arrest; Dendrition cell activation; NK cell activation; Antibody production; Apoptosis	6.81651e-19	-0.936788	1	1	4.83291e-16	seurat_exp_3
19; Toll-like-receptor-signaling-pathway	Toll_like_receptor_signaling_pathway	CXCL10	Chemptactic effects ( T cell )	8.97589e-19	-1.71714	1	1	6.36391e-16	seurat_exp_3
11; HIF-1-signaling-pathway	HIF_1_signaling_pathway	SLC2A1	Reduce oxygen consumption; Promote anaerobic metabolism	3.72997e-18	-0.881377	1	1	2.64455e-15	seurat_exp_3
36; TNF-signaling-pathway	TNF_signaling_pathway	CREB3		3.97827e-18	-1.35331	1	1	2.8206e-15	seurat_exp_3
52; RIG-I-like-receptor-signaling-pathway	RIG_I_like_receptor_signaling_pathway	TNF	Inflammatory cytokines; Protein synthesis; Growth arrest; Dendrition cell activation; NK cell activation; Antibody production; Apoptosis	7.02867e-18	-1.04058	1	1	4.98333e-15	seurat_exp_3
120; TNF-signaling-pathway	TNF_signaling_pathway	DNM1L	Necroptosis	1.1968e-17	-0.964806	1	1	8.4853e-15	seurat_exp_3
57; C-type-lectin-receptor-signaling-pathway	C_type_lectin_receptor_signaling_pathway	IL12A	Th2 cell differentiation	1.51594e-17	0.79243	1	1	1.0748e-14	seurat_exp_3
22; C-type-lectin-receptor-signaling-pathway	C_type_lectin_receptor_signaling_pathway	IL23A	Th2 cell differentiation	2.03558e-17	0.897691	1	1	1.44323e-14	seurat_exp_3
160; C-type-lectin-receptor-signaling-pathway	C_type_lectin_receptor_signaling_pathway	CCL22	Th2 cell differentiation	2.49098e-17	-1.41304	1	1	1.76611e-14	seurat_exp_3
55; C-type-lectin-receptor-signaling-pathway	C_type_lectin_receptor_signaling_pathway	IL10	Th2 cell differentiation	1.13333e-16	-1.25203	1	1	8.03529e-14	seurat_exp_3
100; Ras-signaling-pathway	Ras_signaling_pathway	REL	Gene expression	1.59429e-16	-0.611533	1	1	1.13035e-13	seurat_exp_3
56; C-type-lectin-receptor-signaling-pathway	C_type_lectin_receptor_signaling_pathway	IL6	Th2 cell differentiation	3.9051e-16	0.72004	1	1	2.76871e-13	seurat_exp_3
153; TNF-signaling-pathway	TNF_signaling_pathway	MAPK14	Cell survival	7.53065e-16	-0.672143	1	1	5.33923e-13	seurat_exp_3
62; Complement-and-coagulation-cascades	Complement_and_coagulation_cascades	ITGAM	Phagocytosis	1.44826e-15	-1.65706	1	1	1.02681e-12	seurat_exp_3
88; IL-17-signaling-pathway	IL_17_signaling_pathway	IL1B	Inflammantory genes; Proinflammantory activities?	1.91373e-15	-0.507508	1	1	1.35684e-12	seurat_exp_3
12; Hippo-signaling-pathway	Hippo_signaling_pathway	CTGF	Anti-apoptotic genes; Pro-proliferation genes	7.9873e-15	-0.605047	1	1	5.663e-12	seurat_exp_3
116; EGFR-tyrosine-kinase-inhibitor-resistance	EGFR_tyrosine_kinase_inhibitor_resistance	STAT3	Abnormal dimerization of STAT 3; DNA; Differentiation; Growth; Proliferation; Survival; Motility; Angiogenesis	8.42985e-15	-1.00363	1	1	5.97676e-12	seurat_exp_3
12; Toll-like-receptor-signaling-pathway	Toll_like_receptor_signaling_pathway	NFKB1	Degradation	8.95883e-15	-0.748286	1	1	6.35181e-12	seurat_exp_3
51; MAPK-signaling-pathway	MAPK_signaling_pathway	ATF4	DNA; Proliferation differentiation, inflammation	9.23826e-15	-0.635599	1	1	6.54993e-12	seurat_exp_3
75; Chemokine-signaling-pathway	Chemokine_signaling_pathway	WAS		2.42265e-14	-0.702985	1	1	1.71766e-11	seurat_exp_3
54; MAPK-signaling-pathway	MAPK_signaling_pathway	DDIT3	DNA; Proliferation differentiation, inflammation	3.37564e-14	-0.7017	1	1	2.39333e-11	seurat_exp_3
64; Complement-and-coagulation-cascades	Complement_and_coagulation_cascades	VSIG4	Phagocytosis	3.92558e-14	-1.79655	1	1	2.78324e-11	seurat_exp_3
148; C-type-lectin-receptor-signaling-pathway	C_type_lectin_receptor_signaling_pathway	IL1B	Th1 Th17 cell differentiation	5.93091e-14	-2.29611	1	1	4.20502e-11	seurat_exp_3
17; Rap1-signaling-pathway	Rap1_signaling_pathway	ACTB	Cell adhesion,migration,polarity	6.48518e-14	-1.04078	1	1	4.59799e-11	seurat_exp_3
18; Toll-like-receptor-signaling-pathway	Toll_like_receptor_signaling_pathway	CXCL11	Chemptactic effects ( T cell )	7.40625e-14	-1.26276	1	1	5.25103e-11	seurat_exp_3
75; Hippo-signaling-pathway	Hippo_signaling_pathway	NKD1	Anti-apoptotic genes; Pro-proliferation genes	7.53671e-14	-0.742977	1	1	5.34353e-11	seurat_exp_3
74; Hippo-signaling-pathway	Hippo_signaling_pathway	AXIN1	Anti-apoptotic genes; Pro-proliferation genes	1.06143e-13	-0.765582	1	1	7.52557e-11	seurat_exp_3
135; NF-kappa-B-signaling-pathway	NF_kappa_B_signaling_pathway	CCL19	Lymphoid-tissue homing	2.41124e-13	-4.64112	1	1	1.70957e-10	seurat_exp_3
89; HIF-1-signaling-pathway	HIF_1_signaling_pathway	CDKN1A	Reduce oxygen consumption; Regulate proliferation and apoptosis	3.02449e-13	-0.520543	1	1	2.14436e-10	seurat_exp_3
89; Hippo-signaling-pathway	Hippo_signaling_pathway	ID2	Anti-apoptotic genes; Pro-proliferation genes	4.8084e-13	-0.580904	1	1	3.40915e-10	seurat_exp_3
86; IL-17-signaling-pathway	IL_17_signaling_pathway	IL1B	Inflammantory genes; Antibacterial peptides Th17 cytokines; Inflammention; Host defence; Autoimmune	5.65371e-13	-0.528919	1	1	4.00848e-10	seurat_exp_3
134; NF-kappa-B-signaling-pathway	NF_kappa_B_signaling_pathway	CCL21	Lymphoid-tissue homing	7.60476e-13	-1.73956	1	1	5.39178e-10	seurat_exp_3
78; Hippo-signaling-pathway	Hippo_signaling_pathway	SOX2	Anti-apoptotic genes; Pro-proliferation genes	3.47079e-12	-0.679441	1	1	2.46079e-09	seurat_exp_3
57; ErbB-signaling-pathway	ErbB_signaling_pathway	ABL1		7.68605e-12	-1.53591	1	1	5.44941e-09	seurat_exp_3
14; Rap1-signaling-pathway	Rap1_signaling_pathway	MAPK14	Proliferation survival gene activation	8.60255e-12	-0.686048	1	1	6.09921e-09	seurat_exp_3
48; ErbB-signaling-pathway	ErbB_signaling_pathway	CAMK2A	Cellular targets	1.34724e-11	-1.75271	1	1	9.55195e-09	seurat_exp_3
65; Complement-and-coagulation-cascades	Complement_and_coagulation_cascades	C5AR1	Degranulation, chemotaxis	1.495e-11	-1.31352	1	1	1.05995e-08	seurat_exp_3
95; Rap1-signaling-pathway	Rap1_signaling_pathway	THBS1	Defective angiogensis	2.25048e-11	-1.18312	1	1	1.59559e-08	seurat_exp_3
28; C-type-lectin-receptor-signaling-pathway	C_type_lectin_receptor_signaling_pathway	IL12A	Th1 Th17 cell differentiation	3.68099e-11	-1.04469	1	1	2.60982e-08	seurat_exp_3
55; MAPK-signaling-pathway	MAPK_signaling_pathway	ELK4	DNA; Proliferation differentiation, inflammation	3.70619e-11	-0.685251	1	1	2.62769e-08	seurat_exp_3
53; MAPK-signaling-pathway	MAPK_signaling_pathway	MAX	DNA; Proliferation differentiation, inflammation	5.87313e-11	-0.682821	1	1	4.16405e-08	seurat_exp_3
52; MAPK-signaling-pathway	MAPK_signaling_pathway	MEF2C	DNA; Proliferation differentiation, inflammation	8.18342e-11	-0.631386	1	1	5.80204e-08	seurat_exp_3
40; ErbB-signaling-pathway	ErbB_signaling_pathway	ELK1	DNA; Angiogenesis	1.15941e-10	-1.64348	1	1	8.22019e-08	seurat_exp_3
57; MAPK-signaling-pathway	MAPK_signaling_pathway	ELK1	p53 signaling pathway; Proliferation differentiation, inflammation	1.31714e-10	-0.60213	1	1	9.33855e-08	seurat_exp_3
77; Toll-like-receptor-signaling-pathway	Toll_like_receptor_signaling_pathway	CXCL9	Chemptactic effects ( T cell )	1.9493e-10	-1.4858	1	1	1.38205e-07	seurat_exp_3
5; T-cell-receptor-signaling-pathway	T_cell_receptor_signaling_pathway	CDK4	Proliferation Differentation; Immuno response	4.73439e-10	-0.984748	1	1	3.35668e-07	seurat_exp_3
54; NF-kappa-B-signaling-pathway	NF_kappa_B_signaling_pathway	CCL13	Lymphoid-tissue homing	7.0171e-10	-2.01195	1	1	4.97512e-07	seurat_exp_3
19; NOD-like-receptor-signaling-pathway	NOD_like_receptor_signaling_pathway	IL1B		2.4122e-09	-2.09471	1	1	1.71025e-06	seurat_exp_3
161; C-type-lectin-receptor-signaling-pathway	C_type_lectin_receptor_signaling_pathway	CCL17	Th2 cell differentiation	2.95685e-09	-1.19476	1	1	2.0964e-06	seurat_exp_3
136; NF-kappa-B-signaling-pathway	NF_kappa_B_signaling_pathway	TNFSF13B	B-cell development; B-cell survival	3.06421e-09	-2.00263	1	1	2.17253e-06	seurat_exp_3
61; Complement-and-coagulation-cascades	Complement_and_coagulation_cascades	CR2		9.33347e-09	-1.48885	1	1	6.61743e-06	seurat_exp_3
33; C-type-lectin-receptor-signaling-pathway	C_type_lectin_receptor_signaling_pathway	IL1B	Th1 Th17 cell differentiation	9.88939e-09	-5.65815	1	1	7.01158e-06	seurat_exp_3
80; Hippo-signaling-pathway	Hippo_signaling_pathway	BIRC2	Anti-apoptotic genes; Pro-proliferation genes	1.41211e-08	-0.769736	1	1	1.00119e-05	seurat_exp_3
108; NF-kappa-B-signaling-pathway	NF_kappa_B_signaling_pathway	IKBKG		2.96681e-08	-1.25413	1	1	2.10347e-05	seurat_exp_3
47; ErbB-signaling-pathway	ErbB_signaling_pathway	PRKCA	Cellular targets	9.98239e-08	-1.70782	1	1	7.07751e-05	seurat_exp_3
57; Complement-and-coagulation-cascades	Complement_and_coagulation_cascades	PLAUR	Cell adhesion,migration,proliferation	2.88909e-07	-0.740773	1	1	0.000204837	seurat_exp_3
20; Cell-cycle	Cell_cycle	MCM2	DNA; DNA biosynthesis	1.03172e-06	-1.14361	1	1	0.000731491	seurat_exp_3
30; Rap1-signaling-pathway	Rap1_signaling_pathway	ITGAL	Cell adhesion,migration,polarity	1.42768e-06	-0.920884	1	1	0.00101223	seurat_exp_3
58; MAPK-signaling-pathway	MAPK_signaling_pathway	ATF2	p53 signaling pathway; Proliferation differentiation, inflammation	1.50226e-06	-0.582049	1	1	0.0010651	seurat_exp_3
96; Rap1-signaling-pathway	Rap1_signaling_pathway	PLCE1	Proliferation survival gene activation	5.39857e-06	-0.526449	1	1	0.00382759	seurat_exp_3
6; Fc-epsilon-RI-signaling-pathway	Fc_epsilon_RI_signaling_pathway	C00696	Generation of eicosanoids	5.46859e-06	-1.04899	1	1	0.00387723	seurat_exp_3
7; Fc-epsilon-RI-signaling-pathway	Fc_epsilon_RI_signaling_pathway	C05952	Generation of eicosanoids	5.46859e-06	-1.04899	1	1	0.00387723	seurat_exp_3
8; Fc-epsilon-RI-signaling-pathway	Fc_epsilon_RI_signaling_pathway	C05951	Generation of eicosanoids	5.46859e-06	-1.04899	1	1	0.00387723	seurat_exp_3
9; Fc-epsilon-RI-signaling-pathway	Fc_epsilon_RI_signaling_pathway	C02166	Generation of eicosanoids	5.46859e-06	-1.04899	1	1	0.00387723	seurat_exp_3
3; ErbB-signaling-pathway	ErbB_signaling_pathway	ELK1	DNA; Migration/ Invasion	1.16608e-05	-1.22867	1	1	0.0082675	seurat_exp_3
43; ErbB-signaling-pathway	ErbB_signaling_pathway	PTK2	Adhesion Migration	1.81176e-05	-1.43744	1	1	0.0128454	seurat_exp_3
110; cAMP-signaling-pathway	cAMP_signaling_pathway	FOS	Hyperexcitability cell death/survival(hippocampal neuron)	3.06436e-105	-1.09552	1	1	2.17263e-102	seurat_exp_4
16; cGMP-PKG-signaling-pathway	cGMP_PKG_signaling_pathway	MYL9	Smooth muscle relaxation	2.14848e-95	-0.634993	1	1	1.52327e-92	seurat_exp_4
119; MAPK-signaling-pathway	MAPK_signaling_pathway	FOS	DNA; Proliferation differentiation	4.37449e-95	-1.33174	1	1	3.10151e-92	seurat_exp_4
77; Hippo-signaling-pathway	Hippo_signaling_pathway	CCND1	Anti-apoptotic genes; Pro-proliferation genes	2.31231e-84	-1.15809	1	1	1.63943e-81	seurat_exp_4
24; JAK-STAT-signaling-pathway	JAK_STAT_signaling_pathway	MCL1	Anti-apoptosis	2.19053e-83	-0.839721	1	1	1.55309e-80	seurat_exp_4
28; JAK-STAT-signaling-pathway	JAK_STAT_signaling_pathway	CCND1	Cell-cycle progression	3.94425e-79	-0.561259	1	1	2.79647e-76	seurat_exp_4
14; MAPK-signaling-pathway	MAPK_signaling_pathway	MAPT		8.87349e-79	0.585133	1	1	6.29131e-76	seurat_exp_4
83; Apoptosis	Apoptosis	TP53	Pro-apoptotic genes	7.0536e-77	-1.70858	1	1	5.001e-74	seurat_exp_4
53; FoxO-signaling-pathway	FoxO_signaling_pathway	SOD2	Oxidative stress resistance & DNA repair	8.43245e-77	-0.649935	1	1	5.97861e-74	seurat_exp_4
27; p53-signaling-pathway	p53_signaling_pathway	THBS1	Inflammhibition of angiogenesis and metastasis	1.34715e-74	-0.781869	1	1	9.55131e-72	seurat_exp_4
12; Hippo-signaling-pathway	Hippo_signaling_pathway	CTGF	Anti-apoptotic genes; Pro-proliferation genes	1.95525e-73	-0.862796	1	1	1.38627e-70	seurat_exp_4
24; B-cell-receptor-signaling-pathway	B_cell_receptor_signaling_pathway	FOS	DNA; B cell ontogeny; Autoimmunity; Anergy; Immuno response Ig production GC formation	2.10388e-73	-1.05622	1	1	1.49165e-70	seurat_exp_4
97; PI3K-Akt-signaling-pathway	PI3K_Akt_signaling_pathway	MCL1	Cell survival	3.20709e-73	-0.781013	1	1	2.27383e-70	seurat_exp_4
56; ErbB-signaling-pathway	ErbB_signaling_pathway	JUN	DNA; Angiogenesis	1.47992e-71	-2.72783	1	1	1.04926e-68	seurat_exp_4
164; cGMP-PKG-signaling-pathway	cGMP_PKG_signaling_pathway	PPIF	Cardioprotection	3.65504e-68	-1.54939	1	1	2.59142e-65	seurat_exp_4
85; Apoptosis	Apoptosis	FASLG	Pro-apoptotic genes	3.62579e-65	-1.45772	1	1	2.57068e-62	seurat_exp_4
145; Endocrine-resistance	Endocrine_resistance	FOS	DNA; CoA overexpression AP1/SP1 overexpression; Transcription Proliferation	6.33798e-65	-1.26725	1	1	4.49362e-62	seurat_exp_4
79; Hippo-signaling-pathway	Hippo_signaling_pathway	SNAI2	Anti-apoptotic genes; Pro-proliferation genes	2.72979e-64	-0.942741	1	1	1.93542e-61	seurat_exp_4
116; NF-kappa-B-signaling-pathway	NF_kappa_B_signaling_pathway	GADD45B	Survival	1.03006e-63	-3.65362	1	1	7.30315e-61	seurat_exp_4
84; Apoptosis	Apoptosis	FAS	Pro-apoptotic genes	2.08058e-62	-1.54557	1	1	1.47513e-59	seurat_exp_4
86; Apoptosis	Apoptosis	BCL2L11	Pro-apoptotic genes	4.00228e-62	-1.48453	1	1	2.83762e-59	seurat_exp_4
126; Endocrine-resistance	Endocrine_resistance	FOS	DNA; Transcription Proliferation	5.27034e-62	-1.89525	1	1	3.73667e-59	seurat_exp_4
40; TNF-signaling-pathway	TNF_signaling_pathway	JUN		4.34764e-61	-1.75472	1	1	3.08248e-58	seurat_exp_4
174; NOD-like-receptor-signaling-pathway	NOD_like_receptor_signaling_pathway	CCL2	Chemokines	9.44872e-61	-1.47912	1	1	6.69914e-58	seurat_exp_4
38; TNF-signaling-pathway	TNF_signaling_pathway	CEBPB		2.38148e-60	-1.10057	1	1	1.68847e-57	seurat_exp_4
38; IL-17-signaling-pathway	IL_17_signaling_pathway	CEBPB		1.88379e-58	-0.666764	1	1	1.3356e-55	seurat_exp_4
52; Hippo-signaling-pathway	Hippo_signaling_pathway	ITGB2	Anti-apoptotic genes; Pro-proliferation genes	2.54129e-58	-0.642406	1	1	1.80177e-55	seurat_exp_4
2; NF-kappa-B-signaling-pathway	NF_kappa_B_signaling_pathway	BCL2L1	Survival	4.53749e-58	-3.2631	1	1	3.21708e-55	seurat_exp_4
111; cAMP-signaling-pathway	cAMP_signaling_pathway	JUN	Hyperexcitability cell death/survival(hippocampal neuron)	1.33227e-57	-0.719357	1	1	9.44583e-55	seurat_exp_4
44; Fc-gamma-R-mediated-phagocytosis	Fc_gamma_R_mediated_phagocytosis	GSN	Phagocytosis; Membrane traficking; Particle internalization; Phagosome closure; Phagosome-lysosome fusion	1.52362e-57	-1.08598	1	1	1.08025e-54	seurat_exp_4
51; NF-kappa-B-signaling-pathway	NF_kappa_B_signaling_pathway	TNFAIP3	Negative feedback	4.61566e-57	-4.45754	1	1	3.2725e-54	seurat_exp_4
50; NF-kappa-B-signaling-pathway	NF_kappa_B_signaling_pathway	NFKBIA	Negative feedback	6.215e-57	-4.65202	1	1	4.40644e-54	seurat_exp_4
142; NF-kappa-B-signaling-pathway	NF_kappa_B_signaling_pathway	NFKB2	Activation of noncanonical pathway	5.62285e-56	-3.97432	1	1	3.9866e-53	seurat_exp_4
35; Wnt-signaling-pathway	Wnt_signaling_pathway	JUN		7.07608e-56	-0.786316	1	1	5.01694e-53	seurat_exp_4
93; NF-kappa-B-signaling-pathway	NF_kappa_B_signaling_pathway	PLAU	Survival	1.69303e-55	-0.87247	1	1	1.20036e-52	seurat_exp_4
121; Chemokine-signaling-pathway	Chemokine_signaling_pathway	NFKB1	DNA; Cytokine production; Cellular gowth and differentiation; Cell survival; Migration; Apoptosis	3.52396e-55	-0.942302	1	1	2.49849e-52	seurat_exp_4
108; MAPK-signaling-pathway	MAPK_signaling_pathway	JUN	DNA; Proliferation differentiation, inflammation	6.86481e-55	-0.9411	1	1	4.86715e-52	seurat_exp_4
175; NOD-like-receptor-signaling-pathway	NOD_like_receptor_signaling_pathway	CCL5	Chemokines	1.38821e-53	-1.51021	1	1	9.84243e-51	seurat_exp_4
129; NF-kappa-B-signaling-pathway	NF_kappa_B_signaling_pathway	PTGS2	Inflammation	5.29736e-53	-3.57305	1	1	3.75583e-50	seurat_exp_4
128; NF-kappa-B-signaling-pathway	NF_kappa_B_signaling_pathway	IL1B	Positive feedback	2.67496e-52	-4.35821	1	1	1.89655e-49	seurat_exp_4
27; JAK-STAT-signaling-pathway	JAK_STAT_signaling_pathway	PIM1	Anti-apoptosis	2.96281e-52	-0.557902	1	1	2.10063e-49	seurat_exp_4
94; NF-kappa-B-signaling-pathway	NF_kappa_B_signaling_pathway	BCL2L1	Survival	5.07633e-52	-0.725565	1	1	3.59911e-49	seurat_exp_4
114; Apoptosis	Apoptosis	HRK	Pro-apoptotic genes	1.12413e-51	-1.17875	1	1	7.9701e-49	seurat_exp_4
95; NF-kappa-B-signaling-pathway	NF_kappa_B_signaling_pathway	BCL2L1	Survival	1.17047e-51	-0.759266	1	1	8.29865e-49	seurat_exp_4
107; Apoptosis	Apoptosis	MCL1	Bim-mediated mitochondrial apoptotic events; Apoptosis	1.40042e-51	-0.632001	1	1	9.92899e-49	seurat_exp_4
113; NF-kappa-B-signaling-pathway	NF_kappa_B_signaling_pathway	CFLAR	Survival	3.01567e-51	-3.45482	1	1	2.13811e-48	seurat_exp_4
132; NF-kappa-B-signaling-pathway	NF_kappa_B_signaling_pathway	VCAM1	Inflammation	4.92678e-51	-3.73064	1	1	3.49309e-48	seurat_exp_4
75; Hippo-signaling-pathway	Hippo_signaling_pathway	NKD1	Anti-apoptotic genes; Pro-proliferation genes	5.58456e-51	-0.942757	1	1	3.95945e-48	seurat_exp_4
53; NF-kappa-B-signaling-pathway	NF_kappa_B_signaling_pathway	CXCL8	Survival	8.93733e-51	-4.67519	1	1	6.33657e-48	seurat_exp_4
12; Insulin-signaling-pathway	Insulin_signaling_pathway	FASN	Lipogenesis; Lipid homeostasis	2.09209e-50	0.555876	1	1	1.48329e-47	seurat_exp_4
17; Rap1-signaling-pathway	Rap1_signaling_pathway	ACTB	Cell adhesion,migration,polarity	2.80933e-50	-1.33302	1	1	1.99181e-47	seurat_exp_4
114; NF-kappa-B-signaling-pathway	NF_kappa_B_signaling_pathway	BCL2A1	Survival	3.06148e-50	-3.68152	1	1	2.17059e-47	seurat_exp_4
3; Apoptosis	Apoptosis	BCL2L1	Pro-survival genes	6.72896e-50	-1.28005	1	1	4.77083e-47	seurat_exp_4
133; NF-kappa-B-signaling-pathway	NF_kappa_B_signaling_pathway	CXCL2	Inflammation	1.10915e-49	-3.18429	1	1	7.8639e-47	seurat_exp_4
74; Hippo-signaling-pathway	Hippo_signaling_pathway	AXIN1	Anti-apoptotic genes; Pro-proliferation genes	4.04322e-49	-1.02098	1	1	2.86665e-46	seurat_exp_4
170; NOD-like-receptor-signaling-pathway	NOD_like_receptor_signaling_pathway	IL6	Pro-inflammatory cytokines	5.50623e-49	-1.37364	1	1	3.90392e-46	seurat_exp_4
108; cAMP-signaling-pathway	cAMP_signaling_pathway	AMH	Increased testticular AMH output (prepuberfal sertoli cell)	9.37465e-49	-0.504283	1	1	6.64663e-46	seurat_exp_4
131; NF-kappa-B-signaling-pathway	NF_kappa_B_signaling_pathway	CCL4L1	Inflammation	9.52506e-49	-3.78185	1	1	6.75327e-46	seurat_exp_4
78; Hippo-signaling-pathway	Hippo_signaling_pathway	SOX2	Anti-apoptotic genes; Pro-proliferation genes	1.47465e-48	-0.930642	1	1	1.04553e-45	seurat_exp_4
6; B-cell-receptor-signaling-pathway	B_cell_receptor_signaling_pathway	NFKB1	DNA; B cell ontogeny; Autoimmunity; Anergy; Immuno response Ig production GC formation	2.27874e-48	-2.04127	1	1	1.61562e-45	seurat_exp_4
173; NOD-like-receptor-signaling-pathway	NOD_like_receptor_signaling_pathway	CXCL1	Chemokines	3.24066e-48	-1.29061	1	1	2.29763e-45	seurat_exp_4
52; NF-kappa-B-signaling-pathway	NF_kappa_B_signaling_pathway	TRAF1	Survival	5.60099e-48	-4.08205	1	1	3.9711e-45	seurat_exp_4
27; Fc-gamma-R-mediated-phagocytosis	Fc_gamma_R_mediated_phagocytosis	ARPC5	Phagocytosis; Membrane traficking; Particle internalization; Phagosome closure; Phagosome-lysosome fusion	6.44348e-48	-1.38595	1	1	4.56843e-45	seurat_exp_4
178; NOD-like-receptor-signaling-pathway	NOD_like_receptor_signaling_pathway	IL1B	Pro-inflammatory cytokines	7.24867e-48	-1.69694	1	1	5.13931e-45	seurat_exp_4
21; Toll-like-receptor-signaling-pathway	Toll_like_receptor_signaling_pathway	IFNA1	Antiviral effects	3.06784e-47	-1.11213	1	1	2.1751e-44	seurat_exp_4
172; NOD-like-receptor-signaling-pathway	NOD_like_receptor_signaling_pathway	CXCL8	Chemokines	3.52469e-47	-1.87041	1	1	2.49901e-44	seurat_exp_4
4; NF-kappa-B-signaling-pathway	NF_kappa_B_signaling_pathway	BIRC2	Survival	4.40509e-47	-4.05206	1	1	3.12321e-44	seurat_exp_4
116; EGFR-tyrosine-kinase-inhibitor-resistance	EGFR_tyrosine_kinase_inhibitor_resistance	STAT3	Abnormal dimerization of STAT 3; DNA; Differentiation; Growth; Proliferation; Survival; Motility; Angiogenesis	4.41651e-47	-1.29102	1	1	3.13131e-44	seurat_exp_4
130; NF-kappa-B-signaling-pathway	NF_kappa_B_signaling_pathway	TNF	Positive feedback	6.8755e-47	-3.62969	1	1	4.87473e-44	seurat_exp_4
76; Hippo-signaling-pathway	Hippo_signaling_pathway	MYC	Anti-apoptotic genes; Pro-proliferation genes	6.73937e-46	-0.963132	1	1	4.77821e-43	seurat_exp_4
55; NF-kappa-B-signaling-pathway	NF_kappa_B_signaling_pathway	CXCL12	Myeloiesis and B-cell lymphopoieses	8.37778e-46	-1.66148	1	1	5.93985e-43	seurat_exp_4
69; Apoptosis	Apoptosis	PTPN13	Pro-survival genes	2.53051e-45	-1.33181	1	1	1.79413e-42	seurat_exp_4
38; Fc-gamma-R-mediated-phagocytosis	Fc_gamma_R_mediated_phagocytosis	CFL1	Phagocytosis; Membrane traficking; Particle internalization; Phagosome closure; Phagosome-lysosome fusion	4.84955e-45	0.765973	1	1	3.43833e-42	seurat_exp_4
57; C-type-lectin-receptor-signaling-pathway	C_type_lectin_receptor_signaling_pathway	IL12A	Th2 cell differentiation	8.3775e-45	1.32238	1	1	5.93965e-42	seurat_exp_4
141; TNF-signaling-pathway	TNF_signaling_pathway	JUN	Cell survival	3.21126e-44	-0.812828	1	1	2.27678e-41	seurat_exp_4
22; C-type-lectin-receptor-signaling-pathway	C_type_lectin_receptor_signaling_pathway	IL23A	Th2 cell differentiation	5.49491e-44	1.25958	1	1	3.89589e-41	seurat_exp_4
183; NOD-like-receptor-signaling-pathway	NOD_like_receptor_signaling_pathway	CAMP	Antimicrobial peptides; Defensins	5.53257e-44	-1.00074	1	1	3.92259e-41	seurat_exp_4
55; C-type-lectin-receptor-signaling-pathway	C_type_lectin_receptor_signaling_pathway	IL10	Th2 cell differentiation	7.95899e-44	-1.50549	1	1	5.64292e-41	seurat_exp_4
35; ErbB-signaling-pathway	ErbB_signaling_pathway	CBL	Receptor ubiquitylation;Degradation	1.51643e-43	-1.66965	1	1	1.07515e-40	seurat_exp_4
69; MAPK-signaling-pathway	MAPK_signaling_pathway	HSPB1	DNA; Proliferation differentiation, inflammation	4.31711e-43	-1.35391	1	1	3.06083e-40	seurat_exp_4
96; NF-kappa-B-signaling-pathway	NF_kappa_B_signaling_pathway	BCL2A1	Survival	5.13052e-43	-0.811057	1	1	3.63754e-40	seurat_exp_4
160; C-type-lectin-receptor-signaling-pathway	C_type_lectin_receptor_signaling_pathway	CCL22	Th2 cell differentiation	9.38013e-43	-1.64102	1	1	6.65051e-40	seurat_exp_4
50; FoxO-signaling-pathway	FoxO_signaling_pathway	TNFSF10	Apoptosis	1.62307e-42	-0.522458	1	1	1.15076e-39	seurat_exp_4
98; PI3K-Akt-signaling-pathway	PI3K_Akt_signaling_pathway	BCL2L1	Cell survival	2.89798e-42	-0.598059	1	1	2.05467e-39	seurat_exp_4
70; Apoptosis	Apoptosis	CFLAR	Pro-survival genes	3.50317e-42	-1.37427	1	1	2.48375e-39	seurat_exp_4
71; Apoptosis	Apoptosis	GADD45G	Pro-survival genes	5.41596e-42	-1.20287	1	1	3.83992e-39	seurat_exp_4
15; MAPK-signaling-pathway	MAPK_signaling_pathway	NFKB1	Proliferation inflammation anti-apoptosis	6.15821e-42	-0.96709	1	1	4.36617e-39	seurat_exp_4
169; NOD-like-receptor-signaling-pathway	NOD_like_receptor_signaling_pathway	IL18	Pro-inflammatory cytokines	6.2511e-42	-1.10158	1	1	4.43203e-39	seurat_exp_4
72; Apoptosis	Apoptosis	BCL2A1	Pro-survival genes	9.38916e-42	-1.43457	1	1	6.65691e-39	seurat_exp_4
51; Hedgehog-signaling-pathway	Hedgehog_signaling_pathway	CCND1	Activiation of Hh target genes; Cell prolifeation tissue patterning stem cell maintenance,	1.14231e-41	-0.594574	1	1	8.09897e-39	seurat_exp_4
59; Ras-signaling-pathway	Ras_signaling_pathway	STK4	Apoptosis; Cell-cycle arrest	1.23412e-41	-0.900273	1	1	8.74991e-39	seurat_exp_4
80; Hippo-signaling-pathway	Hippo_signaling_pathway	BIRC2	Anti-apoptotic genes; Pro-proliferation genes	1.414e-41	-1.04415	1	1	1.00253e-38	seurat_exp_4
138; TNF-signaling-pathway	TNF_signaling_pathway	NFKB1	Degradation; Cell survival	1.67812e-41	-1.54101	1	1	1.18979e-38	seurat_exp_4
54; RIG-I-like-receptor-signaling-pathway	RIG_I_like_receptor_signaling_pathway	CXCL10	Inflammatory cytokines; Protein synthesis; Growth arrest; Dendrition cell activation; NK cell activation; Antibody production; Apoptosis	5.9951e-41	-3.13586	1	1	4.25053e-38	seurat_exp_4
171; NOD-like-receptor-signaling-pathway	NOD_like_receptor_signaling_pathway	TNF	Pro-inflammatory cytokines	9.44758e-41	-1.16084	1	1	6.69834e-38	seurat_exp_4
35; PI3K-Akt-signaling-pathway	PI3K_Akt_signaling_pathway	CCND1	Cell cycle progression	1.32671e-40	-0.528634	1	1	9.40639e-38	seurat_exp_4
50; C-type-lectin-receptor-signaling-pathway	C_type_lectin_receptor_signaling_pathway	IL17D	Tfh cell differentiation	1.65273e-40	-2.82042	1	1	1.17179e-37	seurat_exp_4
168; C-type-lectin-receptor-signaling-pathway	C_type_lectin_receptor_signaling_pathway	IL12A	Th1 Th17 cell differentiation	2.59313e-40	-2.32837	1	1	1.83853e-37	seurat_exp_4
56; C-type-lectin-receptor-signaling-pathway	C_type_lectin_receptor_signaling_pathway	IL6	Th2 cell differentiation	6.47265e-40	1.17235	1	1	4.58911e-37	seurat_exp_4
166; TNF-signaling-pathway	TNF_signaling_pathway	IFNB1		1.30164e-39	-0.671295	1	1	9.22865e-37	seurat_exp_4
115; NF-kappa-B-signaling-pathway	NF_kappa_B_signaling_pathway	XIAP	Survival	3.30758e-39	-3.01729	1	1	2.34507e-36	seurat_exp_4
73; Apoptosis	Apoptosis	TRAF1	Pro-survival genes	7.54183e-39	-1.40675	1	1	5.34716e-36	seurat_exp_4
10; Apoptosis	Apoptosis	BIRC2	Pro-survival genes	2.11243e-38	-1.24353	1	1	1.49771e-35	seurat_exp_4
19; Toll-like-receptor-signaling-pathway	Toll_like_receptor_signaling_pathway	CXCL10	Chemptactic effects ( T cell )	2.29454e-38	-1.91514	1	1	1.62683e-35	seurat_exp_4
56; MAPK-signaling-pathway	MAPK_signaling_pathway	TP53	p53 signaling pathway; Proliferation differentiation, inflammation	5.25438e-37	-0.865382	1	1	3.72536e-34	seurat_exp_4
120; TNF-signaling-pathway	TNF_signaling_pathway	DNM1L	Necroptosis	6.1889e-37	-1.40029	1	1	4.38793e-34	seurat_exp_4
137; NF-kappa-B-signaling-pathway	NF_kappa_B_signaling_pathway	ICAM1	Lymphocyte adhesion, T-cell costimulation	4.19426e-36	-3.64396	1	1	2.97373e-33	seurat_exp_4
40; Toll-like-receptor-signaling-pathway	Toll_like_receptor_signaling_pathway	CCL5	Chemotactic effects ( Nutrophil, Immature DC )( NK cell )	1.15044e-35	-1.27479	1	1	8.15663e-33	seurat_exp_4
118; cAMP-signaling-pathway	cAMP_signaling_pathway	MYL9	Relaxation (endothelial cell, smooth muscle cell)	7.35156e-35	-0.746324	1	1	5.21226e-32	seurat_exp_4
95; Rap1-signaling-pathway	Rap1_signaling_pathway	THBS1	Defective angiogensis	1.18056e-34	-1.43776	1	1	8.3702e-32	seurat_exp_4
58; PPAR-signaling-pathway	PPAR_signaling_pathway	PLTP	Ketogenesis; Lipid metabolism	1.24489e-34	-0.529281	1	1	8.8263e-32	seurat_exp_4
14; Hippo-signaling-pathway	Hippo_signaling_pathway	AREG	Anti-apoptotic genes; Pro-proliferation genes	1.24648e-34	-0.504404	1	1	8.83756e-32	seurat_exp_4
14; Cytosolic-DNA-sensing-pathway	Cytosolic_DNA_sensing_pathway	CXCL10	Pro-inflammatory cytokines and chemokines	1.86021e-34	-1.26357	1	1	1.31889e-31	seurat_exp_4
103; Chemokine-signaling-pathway	Chemokine_signaling_pathway	PAK1		2.87733e-33	-0.937492	1	1	2.04003e-30	seurat_exp_4
57; HIF-1-signaling-pathway	HIF_1_signaling_pathway	TIMP1	Increase oxygen delivery; Angiogenesis	1.41759e-32	-0.81078	1	1	1.00507e-29	seurat_exp_4
63; HIF-1-signaling-pathway	HIF_1_signaling_pathway	TIMP1	Matrix and barrier functions	1.41759e-32	-0.81078	1	1	1.00507e-29	seurat_exp_4
51; RIG-I-like-receptor-signaling-pathway	RIG_I_like_receptor_signaling_pathway	CXCL8	Inflammatory cytokines; Protein synthesis; Growth arrest; Dendrition cell activation; NK cell activation; Antibody production; Apoptosis	2.83531e-32	-1.58578	1	1	2.01023e-29	seurat_exp_4
77; Toll-like-receptor-signaling-pathway	Toll_like_receptor_signaling_pathway	CXCL9	Chemptactic effects ( T cell )	3.55691e-32	-1.72383	1	1	2.52185e-29	seurat_exp_4
94; Hippo-signaling-pathway	Hippo_signaling_pathway	GLI2	Anti-apoptotic genes; Pro-proliferation genes	5.8839e-32	-0.54893	1	1	4.17169e-29	seurat_exp_4
63; Complement-and-coagulation-cascades	Complement_and_coagulation_cascades	ITGAX	Phagocytosis	6.90801e-32	-1.86288	1	1	4.89778e-29	seurat_exp_4
182; NOD-like-receptor-signaling-pathway	NOD_like_receptor_signaling_pathway	C16054...		7.19662e-32	-0.875351	1	1	5.1024e-29	seurat_exp_4
3; NF-kappa-B-signaling-pathway	NF_kappa_B_signaling_pathway	BCL2	Survival	1.64148e-31	-2.77519	1	1	1.16381e-28	seurat_exp_4
60; Hippo-signaling-pathway	Hippo_signaling_pathway	CTGF	Anti-apoptotic genes; Pro-proliferation genes	1.97974e-31	-0.952472	1	1	1.40364e-28	seurat_exp_4
40; ErbB-signaling-pathway	ErbB_signaling_pathway	ELK1	DNA; Angiogenesis	3.20773e-31	-1.79232	1	1	2.27428e-28	seurat_exp_4
54; Ras-signaling-pathway	Ras_signaling_pathway	RHOA	Cytoskeleton organization; Cell motolity	1.0712e-30	-0.541543	1	1	7.59477e-28	seurat_exp_4
61; HIF-1-signaling-pathway	HIF_1_signaling_pathway	HMOX1	Increase oxygen delivery; Vascular tone	1.04861e-29	-0.804049	1	1	7.43468e-27	seurat_exp_4
54; Chemokine-signaling-pathway	Chemokine_signaling_pathway	ROCK1		1.50366e-29	-0.648543	1	1	1.0661e-26	seurat_exp_4
33; Cytosolic-DNA-sensing-pathway	Cytosolic_DNA_sensing_pathway	CCL5	Pro-inflammatory cytokines and chemokines	1.68096e-29	-0.908077	1	1	1.1918e-26	seurat_exp_4
9; T-cell-receptor-signaling-pathway	T_cell_receptor_signaling_pathway	IL10	Proliferation Differentation; Immuno response	2.81921e-29	-1.32544	1	1	1.99882e-26	seurat_exp_4
34; Toll-like-receptor-signaling-pathway	Toll_like_receptor_signaling_pathway	IL1B	Inflammatory cytokines;Proinflammatory effects	3.06086e-29	-1.24964	1	1	2.17015e-26	seurat_exp_4
20; Toll-like-receptor-signaling-pathway	Toll_like_receptor_signaling_pathway	IFNB1	Antiviral effects	3.44724e-29	-0.994642	1	1	2.44409e-26	seurat_exp_4
14; Rap1-signaling-pathway	Rap1_signaling_pathway	MAPK14	Proliferation survival gene activation	4.00351e-29	-0.823307	1	1	2.83849e-26	seurat_exp_4
39; Toll-like-receptor-signaling-pathway	Toll_like_receptor_signaling_pathway	IL6	Inflammatory cytokines;Proinflammatory effects	6.62956e-29	-0.987009	1	1	4.70036e-26	seurat_exp_4
10; T-cell-receptor-signaling-pathway	T_cell_receptor_signaling_pathway	IL5	Proliferation Differentation; Immuno response	1.20735e-28	-1.21859	1	1	8.56011e-26	seurat_exp_4
148; C-type-lectin-receptor-signaling-pathway	C_type_lectin_receptor_signaling_pathway	IL1B	Th1 Th17 cell differentiation	1.32894e-28	-2.43035	1	1	9.42216e-26	seurat_exp_4
161; C-type-lectin-receptor-signaling-pathway	C_type_lectin_receptor_signaling_pathway	CCL17	Th2 cell differentiation	1.73695e-28	-1.44995	1	1	1.2315e-25	seurat_exp_4
53; RIG-I-like-receptor-signaling-pathway	RIG_I_like_receptor_signaling_pathway	IL12A	Inflammatory cytokines; Protein synthesis; Growth arrest; Dendrition cell activation; NK cell activation; Antibody production; Apoptosis	2.33669e-28	-1.07241	1	1	1.65672e-25	seurat_exp_4
29; Toll-like-receptor-signaling-pathway	Toll_like_receptor_signaling_pathway	CXCL8	Chemotactic effects ( Nutrophil, Immature DC )( NK cell )	3.24009e-28	-1.58167	1	1	2.29723e-25	seurat_exp_4
37; C-type-lectin-receptor-signaling-pathway	C_type_lectin_receptor_signaling_pathway	IL6	Th1 Th17 cell differentiation	3.50571e-28	-0.880052	1	1	2.48555e-25	seurat_exp_4
18; Toll-like-receptor-signaling-pathway	Toll_like_receptor_signaling_pathway	CXCL11	Chemptactic effects ( T cell )	3.8453e-28	-1.44871	1	1	2.72632e-25	seurat_exp_4
47; ErbB-signaling-pathway	ErbB_signaling_pathway	PRKCA	Cellular targets	7.3405e-28	-1.8157	1	1	5.20441e-25	seurat_exp_4
57; ErbB-signaling-pathway	ErbB_signaling_pathway	ABL1		5.28362e-27	-1.62658	1	1	3.74609e-24	seurat_exp_4
8; T-cell-receptor-signaling-pathway	T_cell_receptor_signaling_pathway	IFNG	Proliferation Differentation; Immuno response	5.39e-27	-1.33541	1	1	3.82151e-24	seurat_exp_4
6; T-cell-receptor-signaling-pathway	T_cell_receptor_signaling_pathway	TNF	Proliferation Differentation; Immuno response	1.51947e-26	-1.46445	1	1	1.0773e-23	seurat_exp_4
52; RIG-I-like-receptor-signaling-pathway	RIG_I_like_receptor_signaling_pathway	TNF	Inflammatory cytokines; Protein synthesis; Growth arrest; Dendrition cell activation; NK cell activation; Antibody production; Apoptosis	4.74915e-26	-1.15761	1	1	3.36715e-23	seurat_exp_4
7; T-cell-receptor-signaling-pathway	T_cell_receptor_signaling_pathway	CSF2	Proliferation Differentation; Immuno response	5.52691e-26	-1.26473	1	1	3.91858e-23	seurat_exp_4
12; T-cell-receptor-signaling-pathway	T_cell_receptor_signaling_pathway	IL2	Proliferation Differentation; Immuno response	7.5995e-26	-1.27515	1	1	5.38805e-23	seurat_exp_4
79; C-type-lectin-receptor-signaling-pathway	C_type_lectin_receptor_signaling_pathway	IL1B	Th1 Th17 cell differentiation	1.30615e-25	-1.08331	1	1	9.26063e-23	seurat_exp_4
102; C-type-lectin-receptor-signaling-pathway	C_type_lectin_receptor_signaling_pathway	IL10	Th1 Th17 cell differentiation	3.06643e-25	-0.751822	1	1	2.1741e-22	seurat_exp_4
62; Complement-and-coagulation-cascades	Complement_and_coagulation_cascades	ITGAM	Phagocytosis	4.71093e-25	-1.73977	1	1	3.34005e-22	seurat_exp_4
107; MAPK-signaling-pathway	MAPK_signaling_pathway	JUND	DNA; Proliferation differentiation, inflammation	4.91998e-25	-0.675839	1	1	3.48826e-22	seurat_exp_4
77; C-type-lectin-receptor-signaling-pathway	C_type_lectin_receptor_signaling_pathway	IL6	Th1 Th17 cell differentiation	6.75274e-25	-0.925721	1	1	4.78769e-22	seurat_exp_4
11; T-cell-receptor-signaling-pathway	T_cell_receptor_signaling_pathway	IL4	Proliferation Differentation; Immuno response	2.27478e-24	-1.18742	1	1	1.61282e-21	seurat_exp_4
54; NF-kappa-B-signaling-pathway	NF_kappa_B_signaling_pathway	CCL13	Lymphoid-tissue homing	2.29599e-24	-2.38008	1	1	1.62786e-21	seurat_exp_4
22; Cytosolic-DNA-sensing-pathway	Cytosolic_DNA_sensing_pathway	IL6	Pro-inflammatory cytokines and chemokines	3.26911e-24	-0.605348	1	1	2.3178e-21	seurat_exp_4
149; C-type-lectin-receptor-signaling-pathway	C_type_lectin_receptor_signaling_pathway	IL6	Th1 Th17 cell differentiation	3.32422e-24	-2.75066	1	1	2.35687e-21	seurat_exp_4
64; C-type-lectin-receptor-signaling-pathway	C_type_lectin_receptor_signaling_pathway	IL1B	Th1 Th17 cell differentiation	3.33383e-24	-1.22206	1	1	2.36369e-21	seurat_exp_4
76; Toll-like-receptor-signaling-pathway	Toll_like_receptor_signaling_pathway	CCL3L3	Chemotactic effects ( Nutrophil, Immature DC )( NK cell )	5.16219e-24	-0.903136	1	1	3.65999e-21	seurat_exp_4
38; C-type-lectin-receptor-signaling-pathway	C_type_lectin_receptor_signaling_pathway	IL12A	Th1 Th17 cell differentiation	5.73261e-24	-0.736878	1	1	4.06442e-21	seurat_exp_4
135; NF-kappa-B-signaling-pathway	NF_kappa_B_signaling_pathway	CCL19	Lymphoid-tissue homing	5.8487e-24	-4.79855	1	1	4.14673e-21	seurat_exp_4
48; ErbB-signaling-pathway	ErbB_signaling_pathway	CAMK2A	Cellular targets	6.69922e-24	-1.82104	1	1	4.74975e-21	seurat_exp_4
28; C-type-lectin-receptor-signaling-pathway	C_type_lectin_receptor_signaling_pathway	IL12A	Th1 Th17 cell differentiation	9.67999e-24	-1.19516	1	1	6.86312e-21	seurat_exp_4
11; HIF-1-signaling-pathway	HIF_1_signaling_pathway	SLC2A1	Reduce oxygen consumption; Promote anaerobic metabolism	1.30979e-23	-0.920367	1	1	9.28645e-21	seurat_exp_4
134; NF-kappa-B-signaling-pathway	NF_kappa_B_signaling_pathway	CCL21	Lymphoid-tissue homing	2.04856e-23	-1.9054	1	1	1.45243e-20	seurat_exp_4
57; MAPK-signaling-pathway	MAPK_signaling_pathway	ELK1	p53 signaling pathway; Proliferation differentiation, inflammation	2.13251e-23	-0.699215	1	1	1.51195e-20	seurat_exp_4
13; Hippo-signaling-pathway	Hippo_signaling_pathway	BIRC5	Anti-apoptotic genes; Pro-proliferation genes	2.3731e-23	-0.540747	1	1	1.68253e-20	seurat_exp_4
36; TNF-signaling-pathway	TNF_signaling_pathway	CREB3		2.78009e-23	-1.45934	1	1	1.97108e-20	seurat_exp_4
63; C-type-lectin-receptor-signaling-pathway	C_type_lectin_receptor_signaling_pathway	IL6	Th1 Th17 cell differentiation	2.99515e-23	-1.01171	1	1	2.12356e-20	seurat_exp_4
87; Toll-like-receptor-signaling-pathway	Toll_like_receptor_signaling_pathway	CCL4L1	Chemotactic effects ( Nutrophil, Immature DC )( NK cell )	3.46585e-23	-0.897793	1	1	2.45729e-20	seurat_exp_4
86; Toll-like-receptor-signaling-pathway	Toll_like_receptor_signaling_pathway	IL12A	Inflammatory cytokines;Proinflammatory effects	4.75861e-23	-0.824083	1	1	3.37385e-20	seurat_exp_4
34; TGF-beta-signaling-pathway	TGF_beta_signaling_pathway	ROCK1		7.60181e-23	-0.580513	1	1	5.38968e-20	seurat_exp_4
76; C-type-lectin-receptor-signaling-pathway	C_type_lectin_receptor_signaling_pathway	IL23A	Th1 Th17 cell differentiation	4.46483e-22	-0.834624	1	1	3.16556e-19	seurat_exp_4
173; C-type-lectin-receptor-signaling-pathway	C_type_lectin_receptor_signaling_pathway	C00584	Th1 Th17 cell differentiation	6.96175e-22	-1.72648	1	1	4.93588e-19	seurat_exp_4
88; C-type-lectin-receptor-signaling-pathway	C_type_lectin_receptor_signaling_pathway	IL23A	Th1 Th17 cell differentiation	1.2055e-21	-1.97584	1	1	8.54699e-19	seurat_exp_4
156; C-type-lectin-receptor-signaling-pathway	C_type_lectin_receptor_signaling_pathway	IL10	Th1 Th17 cell differentiation	1.507e-21	-2.07394	1	1	1.06846e-18	seurat_exp_4
125; Endocrine-resistance	Endocrine_resistance	JUN	DNA; Transcription Proliferation	1.65107e-21	-1.44238	1	1	1.17061e-18	seurat_exp_4
136; NF-kappa-B-signaling-pathway	NF_kappa_B_signaling_pathway	TNFSF13B	B-cell development; B-cell survival	2.0488e-21	-2.28952	1	1	1.4526e-18	seurat_exp_4
64; Complement-and-coagulation-cascades	Complement_and_coagulation_cascades	VSIG4	Phagocytosis	3.84619e-21	-1.84709	1	1	2.72695e-18	seurat_exp_4
5; T-cell-receptor-signaling-pathway	T_cell_receptor_signaling_pathway	CDK4	Proliferation Differentation; Immuno response	4.4414e-21	-1.13597	1	1	3.14895e-18	seurat_exp_4
46; Toll-like-receptor-signaling-pathway	Toll_like_receptor_signaling_pathway	TNF	Inflammatory cytokines;Proinflammatory effects	5.22024e-21	-0.798847	1	1	3.70115e-18	seurat_exp_4
129; C-type-lectin-receptor-signaling-pathway	C_type_lectin_receptor_signaling_pathway	IL12A	Th1 Th17 cell differentiation	5.98732e-21	-1.7237	1	1	4.24501e-18	seurat_exp_4
78; C-type-lectin-receptor-signaling-pathway	C_type_lectin_receptor_signaling_pathway	IL12A	Th1 Th17 cell differentiation	6.05182e-21	-0.79666	1	1	4.29074e-18	seurat_exp_4
48; RIG-I-like-receptor-signaling-pathway	RIG_I_like_receptor_signaling_pathway	IFNW1	Type 1 interfeons; Protein synthesis; Growth arrest; Dendrition cell activation; NK cell activation; Antibody production; Apoptosis	7.91266e-21	-1.07063	1	1	5.61007e-18	seurat_exp_4
49; RIG-I-like-receptor-signaling-pathway	RIG_I_like_receptor_signaling_pathway	IFNE	Type 1 interfeons; Protein synthesis; Growth arrest; Dendrition cell activation; NK cell activation; Antibody production; Apoptosis	9.55713e-21	-0.974995	1	1	6.77601e-18	seurat_exp_4
21; TGF-beta-signaling-pathway	TGF_beta_signaling_pathway	CDKN2B	G1 arrest	1.87761e-20	-0.506914	1	1	1.33122e-17	seurat_exp_4
62; C-type-lectin-receptor-signaling-pathway	C_type_lectin_receptor_signaling_pathway	IL23A	Th1 Th17 cell differentiation	2.03496e-20	-0.882934	1	1	1.44279e-17	seurat_exp_4
18; RIG-I-like-receptor-signaling-pathway	RIG_I_like_receptor_signaling_pathway	IFNA1	Type 1 interfeons; Protein synthesis; Growth arrest; Dendrition cell activation; NK cell activation; Antibody production; Apoptosis	2.31987e-20	-1.03182	1	1	1.64479e-17	seurat_exp_4
29; B-cell-receptor-signaling-pathway	B_cell_receptor_signaling_pathway	RAC1		5.16176e-20	-0.505552	1	1	3.65969e-17	seurat_exp_4
51; MAPK-signaling-pathway	MAPK_signaling_pathway	ATF4	DNA; Proliferation differentiation, inflammation	6.0932e-20	-0.691819	1	1	4.32008e-17	seurat_exp_4
50; RIG-I-like-receptor-signaling-pathway	RIG_I_like_receptor_signaling_pathway	IFNK	Type 1 interfeons; Protein synthesis; Growth arrest; Dendrition cell activation; NK cell activation; Antibody production; Apoptosis	8.40684e-20	-1.11369	1	1	5.96045e-17	seurat_exp_4
66; Toll-like-receptor-signaling-pathway	Toll_like_receptor_signaling_pathway	CASP8		8.72831e-20	-0.590421	1	1	6.18837e-17	seurat_exp_4
32; Cytosolic-DNA-sensing-pathway	Cytosolic_DNA_sensing_pathway	CCL4L1	Pro-inflammatory cytokines and chemokines	2.40456e-19	-0.533832	1	1	1.70483e-16	seurat_exp_4
88; Hippo-signaling-pathway	Hippo_signaling_pathway	ID1	Anti-apoptotic genes; Pro-proliferation genes	2.58055e-19	-0.676752	1	1	1.82961e-16	seurat_exp_4
19; RIG-I-like-receptor-signaling-pathway	RIG_I_like_receptor_signaling_pathway	IFNB1	Type 1 interfeons; Protein synthesis; Growth arrest; Dendrition cell activation; NK cell activation; Antibody production; Apoptosis	8.44861e-19	-1.01407	1	1	5.99007e-16	seurat_exp_4
101; C-type-lectin-receptor-signaling-pathway	C_type_lectin_receptor_signaling_pathway	TNF	Th1 Th17 cell differentiation	1.2675e-18	-0.925521	1	1	8.9866e-16	seurat_exp_4
43; ErbB-signaling-pathway	ErbB_signaling_pathway	PTK2	Adhesion Migration	1.62339e-18	-1.53815	1	1	1.15099e-15	seurat_exp_4
75; Chemokine-signaling-pathway	Chemokine_signaling_pathway	WAS		1.94504e-18	-0.740162	1	1	1.37903e-15	seurat_exp_4
100; Ras-signaling-pathway	Ras_signaling_pathway	REL	Gene expression	4.00245e-18	-0.687452	1	1	2.83774e-15	seurat_exp_4
30; Rap1-signaling-pathway	Rap1_signaling_pathway	ITGAL	Cell adhesion,migration,polarity	1.53849e-17	-1.08466	1	1	1.09079e-14	seurat_exp_4
153; TNF-signaling-pathway	TNF_signaling_pathway	MAPK14	Cell survival	2.02678e-17	-0.668562	1	1	1.43699e-14	seurat_exp_4
96; Rap1-signaling-pathway	Rap1_signaling_pathway	PLCE1	Proliferation survival gene activation	4.68839e-17	-0.595698	1	1	3.32407e-14	seurat_exp_4
43; T-cell-receptor-signaling-pathway	T_cell_receptor_signaling_pathway	RHOA		3.84266e-15	-0.519972	1	1	2.72445e-12	seurat_exp_4
67; Rap1-signaling-pathway	Rap1_signaling_pathway	AKT3	Proliferation survival gene activation	1.06974e-14	-0.809109	1	1	7.58443e-12	seurat_exp_4
20; Cell-cycle	Cell_cycle	MCM2	DNA; DNA biosynthesis	4.42942e-14	-2.45657	1	1	3.14046e-11	seurat_exp_4
12; Toll-like-receptor-signaling-pathway	Toll_like_receptor_signaling_pathway	NFKB1	Degradation	5.48215e-14	-0.709096	1	1	3.88684e-11	seurat_exp_4
48; Rap1-signaling-pathway	Rap1_signaling_pathway	PARD3	Cell adhesion,migration,polarity	9.6009e-14	-0.991624	1	1	6.80704e-11	seurat_exp_4
33; C-type-lectin-receptor-signaling-pathway	C_type_lectin_receptor_signaling_pathway	IL1B	Th1 Th17 cell differentiation	1.37789e-13	-5.80702	1	1	9.76921e-11	seurat_exp_4
51; Fc-gamma-R-mediated-phagocytosis	Fc_gamma_R_mediated_phagocytosis	NCF1	NADPH oxidase; Digestion of bacterium; Respiratory burst in phagosome	3.49044e-13	-0.677944	1	1	2.47472e-10	seurat_exp_4
4; Cytosolic-DNA-sensing-pathway	Cytosolic_DNA_sensing_pathway	IL1B	Proinflammatory cytokine processing;Pyroptosis	1.31037e-11	-0.505767	1	1	9.29051e-09	seurat_exp_4
61; Complement-and-coagulation-cascades	Complement_and_coagulation_cascades	CR2		1.43275e-11	-1.53879	1	1	1.01582e-08	seurat_exp_4
65; Complement-and-coagulation-cascades	Complement_and_coagulation_cascades	C5AR1	Degranulation, chemotaxis	2.34327e-11	-1.30853	1	1	1.66138e-08	seurat_exp_4
52; MAPK-signaling-pathway	MAPK_signaling_pathway	MEF2C	DNA; Proliferation differentiation, inflammation	3.36765e-10	-0.641942	1	1	2.38767e-07	seurat_exp_4
57; Complement-and-coagulation-cascades	Complement_and_coagulation_cascades	PLAUR	Cell adhesion,migration,proliferation	3.6149e-10	-0.780244	1	1	2.56297e-07	seurat_exp_4
53; MAPK-signaling-pathway	MAPK_signaling_pathway	MAX	DNA; Proliferation differentiation, inflammation	1.04856e-09	-0.685333	1	1	7.43427e-07	seurat_exp_4
66; Complement-and-coagulation-cascades	Complement_and_coagulation_cascades	C3AR1	Degranulation, chemotaxis	1.18019e-09	-1.4777	1	1	8.36753e-07	seurat_exp_4
6; Fc-epsilon-RI-signaling-pathway	Fc_epsilon_RI_signaling_pathway	C00696	Generation of eicosanoids	1.49301e-09	-1.31122	1	1	1.05854e-06	seurat_exp_4
7; Fc-epsilon-RI-signaling-pathway	Fc_epsilon_RI_signaling_pathway	C05952	Generation of eicosanoids	1.49301e-09	-1.31122	1	1	1.05854e-06	seurat_exp_4
8; Fc-epsilon-RI-signaling-pathway	Fc_epsilon_RI_signaling_pathway	C05951	Generation of eicosanoids	1.49301e-09	-1.31122	1	1	1.05854e-06	seurat_exp_4
9; Fc-epsilon-RI-signaling-pathway	Fc_epsilon_RI_signaling_pathway	C02166	Generation of eicosanoids	1.49301e-09	-1.31122	1	1	1.05854e-06	seurat_exp_4
3; ErbB-signaling-pathway	ErbB_signaling_pathway	ELK1	DNA; Migration/ Invasion	1.59837e-09	-1.31992	1	1	1.13325e-06	seurat_exp_4
86; IL-17-signaling-pathway	IL_17_signaling_pathway	IL1B	Inflammantory genes; Antibacterial peptides Th17 cytokines; Inflammention; Host defence; Autoimmune	1.01912e-08	-0.520533	1	1	7.22559e-06	seurat_exp_4
71; Complement-and-coagulation-cascades	Complement_and_coagulation_cascades	CR1	Phagocytosis	7.57325e-08	-1.39436	1	1	5.36944e-05	seurat_exp_4
82; Rap1-signaling-pathway	Rap1_signaling_pathway	ITGA2B	Cell adhesion,migration,polarity	1.60926e-07	-0.778491	1	1	0.000114096	seurat_exp_4
23; Toll-like-receptor-signaling-pathway	Toll_like_receptor_signaling_pathway	CD40	Costimulatory molecules; T cell stimulation	2.30846e-07	-0.776199	1	1	0.00016367	seurat_exp_4
159; C-type-lectin-receptor-signaling-pathway	C_type_lectin_receptor_signaling_pathway	PTGS2	Th1 Th17 cell differentiation	4.19129e-07	-0.669086	1	1	0.000297162	seurat_exp_4
48; Toll-like-receptor-signaling-pathway	Toll_like_receptor_signaling_pathway	CD80	Costimulatory molecules; T cell stimulation	5.92773e-07	-0.662179	1	1	0.000420276	seurat_exp_4
108; NF-kappa-B-signaling-pathway	NF_kappa_B_signaling_pathway	IKBKG		1.20954e-06	-1.22832	1	1	0.000857563	seurat_exp_4
31; Hedgehog-signaling-pathway	Hedgehog_signaling_pathway	GLI1	Respression of Hh target genes; Cell prolifeation tissue patterning stem cell maintenance, development, ect	1.07693e-05	-0.567806	1	1	0.00763544	seurat_exp_4
22; Toll-like-receptor-signaling-pathway	Toll_like_receptor_signaling_pathway	CD86	Costimulatory molecules; T cell stimulation	1.19693e-05	-0.662462	1	1	0.00848622	seurat_exp_4
18; Rap1-signaling-pathway	Rap1_signaling_pathway	CDH1	Cell adhesion,migration,polarity	1.69823e-05	-0.61456	1	1	0.0120405	seurat_exp_4
164; C-type-lectin-receptor-signaling-pathway	C_type_lectin_receptor_signaling_pathway	EGR2	Th1 Th17 cell differentiation	1.82266e-05	-0.721	1	1	0.0129227	seurat_exp_4
55; MAPK-signaling-pathway	MAPK_signaling_pathway	ELK4	DNA; Proliferation differentiation, inflammation	5.55603e-05	-0.631146	1	1	0.0393922	seurat_exp_4
86; cGMP-PKG-signaling-pathway	cGMP_PKG_signaling_pathway	ATP2A1	Increased calcium sequestration	5.29684e-41	-0.576158	1	1	3.75546e-38	seurat_exp_5
66; Complement-and-coagulation-cascades	Complement_and_coagulation_cascades	C3AR1	Degranulation, chemotaxis	4.19511e-39	-1.42145	1	1	2.97433e-36	seurat_exp_5
71; Complement-and-coagulation-cascades	Complement_and_coagulation_cascades	CR1	Phagocytosis	1.23689e-37	-1.4732	1	1	8.76957e-35	seurat_exp_5
65; Complement-and-coagulation-cascades	Complement_and_coagulation_cascades	C5AR1	Degranulation, chemotaxis	1.165e-34	-1.36861	1	1	8.25986e-32	seurat_exp_5
51; Fc-gamma-R-mediated-phagocytosis	Fc_gamma_R_mediated_phagocytosis	NCF1	NADPH oxidase; Digestion of bacterium; Respiratory burst in phagosome	1.37901e-33	-0.73163	1	1	9.7772e-31	seurat_exp_5
20; NOD-like-receptor-signaling-pathway	NOD_like_receptor_signaling_pathway	IL18		2.4717e-30	-1.03441	1	1	1.75244e-27	seurat_exp_5
31; Complement-and-coagulation-cascades	Complement_and_coagulation_cascades	C6...	Membrane attack complex; Cell lysis	9.82789e-29	-1.15029	1	1	6.96798e-26	seurat_exp_5
53; NF-kappa-B-signaling-pathway	NF_kappa_B_signaling_pathway	CXCL8	Survival	5.82989e-27	3.11541	1	1	4.13339e-24	seurat_exp_5
11; Fc-epsilon-RI-signaling-pathway	Fc_epsilon_RI_signaling_pathway	C00374	Degranulation; Heparin; Toxic to parasites; Increase vascular permeabilityl Cause smiith muscle contraction	7.94921e-27	-0.524788	1	1	5.63599e-24	seurat_exp_5
12; Fc-epsilon-RI-signaling-pathway	Fc_epsilon_RI_signaling_pathway	C00388	Degranulation; Histamine; Toxic to parasites; Increase vascular permeabilityl Cause smiith muscle contraction	7.94921e-27	-0.524788	1	1	5.63599e-24	seurat_exp_5
47; Fc-epsilon-RI-signaling-pathway	Fc_epsilon_RI_signaling_pathway	MAPK8	DNA; Cytokine gene transcription	1.43326e-25	-0.527077	1	1	1.01618e-22	seurat_exp_5
75; Chemokine-signaling-pathway	Chemokine_signaling_pathway	WAS		7.8904e-25	-0.723686	1	1	5.59429e-22	seurat_exp_5
103; Chemokine-signaling-pathway	Chemokine_signaling_pathway	PAK1		8.56707e-23	-0.666164	1	1	6.07405e-20	seurat_exp_5
53; FoxO-signaling-pathway	FoxO_signaling_pathway	SOD2	Oxidative stress resistance & DNA repair	9.3939e-23	0.553079	1	1	6.66028e-20	seurat_exp_5
126; Endocrine-resistance	Endocrine_resistance	FOS	DNA; Transcription Proliferation	2.3508e-22	-0.540678	1	1	1.66672e-19	seurat_exp_5
58; Fc-gamma-R-mediated-phagocytosis	Fc_gamma_R_mediated_phagocytosis	C00219	Phagocytosis; Membrane remodeling; Focal exocytosis; Pseudopod extention; Particle internalization	1.54503e-21	-0.613353	1	1	1.09542e-18	seurat_exp_5
51; RIG-I-like-receptor-signaling-pathway	RIG_I_like_receptor_signaling_pathway	CXCL8	Inflammatory cytokines; Protein synthesis; Growth arrest; Dendrition cell activation; NK cell activation; Antibody production; Apoptosis	4.6795e-21	2.16828	1	1	3.31777e-18	seurat_exp_5
44; Fc-gamma-R-mediated-phagocytosis	Fc_gamma_R_mediated_phagocytosis	GSN	Phagocytosis; Membrane traficking; Particle internalization; Phagosome closure; Phagosome-lysosome fusion	3.42056e-20	-0.789203	1	1	2.42517e-17	seurat_exp_5
23; Fc-epsilon-RI-signaling-pathway	Fc_epsilon_RI_signaling_pathway	AKT3	DNA; Cytokine gene transcription	3.98641e-20	-0.564089	1	1	2.82636e-17	seurat_exp_5
172; NOD-like-receptor-signaling-pathway	NOD_like_receptor_signaling_pathway	CXCL8	Chemokines	4.54907e-20	2.447	1	1	3.22529e-17	seurat_exp_5
82; Rap1-signaling-pathway	Rap1_signaling_pathway	ITGA2B	Cell adhesion,migration,polarity	6.90265e-20	-0.800719	1	1	4.89398e-17	seurat_exp_5
30; Rap1-signaling-pathway	Rap1_signaling_pathway	ITGAL	Cell adhesion,migration,polarity	7.99719e-20	-0.856161	1	1	5.67001e-17	seurat_exp_5
11; Apoptosis	Apoptosis	DFFB	DNA fragmentation; Apoptosis	2.87407e-19	-0.617956	1	1	2.03771e-16	seurat_exp_5
61; Complement-and-coagulation-cascades	Complement_and_coagulation_cascades	CR2		3.41684e-19	-1.48739	1	1	2.42254e-16	seurat_exp_5
27; Fc-gamma-R-mediated-phagocytosis	Fc_gamma_R_mediated_phagocytosis	ARPC5	Phagocytosis; Membrane traficking; Particle internalization; Phagosome closure; Phagosome-lysosome fusion	9.80681e-18	-1.01569	1	1	6.95303e-15	seurat_exp_5
93; NF-kappa-B-signaling-pathway	NF_kappa_B_signaling_pathway	PLAU	Survival	2.08197e-17	0.937387	1	1	1.47612e-14	seurat_exp_5
123; Endocrine-resistance	Endocrine_resistance	CARM1	DNA; CoA overexpression AP1/SP1 overexpression; Transcription Proliferation	5.88584e-17	-0.518181	1	1	4.17306e-14	seurat_exp_5
29; ErbB-signaling-pathway	ErbB_signaling_pathway	STAT5A	DNA; Survival	2.59835e-16	-0.899484	1	1	1.84223e-13	seurat_exp_5
62; Complement-and-coagulation-cascades	Complement_and_coagulation_cascades	ITGAM	Phagocytosis	5.20861e-16	-1.61117	1	1	3.6929e-13	seurat_exp_5
39; HIF-1-signaling-pathway	HIF_1_signaling_pathway	C00002	ATP	9.1726e-16	-0.807556	1	1	6.50337e-13	seurat_exp_5
5; IL-17-signaling-pathway	IL_17_signaling_pathway	IL6	Chemokines; Autoimmune pathology; Neutrophil recruitment; Immunity to extracellular pathogens	9.34682e-16	-0.717726	1	1	6.62689e-13	seurat_exp_5
86; IL-17-signaling-pathway	IL_17_signaling_pathway	IL1B	Inflammantory genes; Antibacterial peptides Th17 cytokines; Inflammention; Host defence; Autoimmune	1.7299e-15	0.551205	1	1	1.2265e-12	seurat_exp_5
54; HIF-1-signaling-pathway	HIF_1_signaling_pathway	SERPINE1	Increase oxygen delivery; Angiogenesis	2.43063e-15	-0.516057	1	1	1.72332e-12	seurat_exp_5
96; NF-kappa-B-signaling-pathway	NF_kappa_B_signaling_pathway	BCL2A1	Survival	9.6975e-15	1.10204	1	1	6.87553e-12	seurat_exp_5
128; NF-kappa-B-signaling-pathway	NF_kappa_B_signaling_pathway	IL1B	Positive feedback	1.1185e-14	1.13006	1	1	7.9302e-12	seurat_exp_5
47; ErbB-signaling-pathway	ErbB_signaling_pathway	PRKCA	Cellular targets	6.89258e-14	-1.19402	1	1	4.88684e-11	seurat_exp_5
6; Fc-epsilon-RI-signaling-pathway	Fc_epsilon_RI_signaling_pathway	C00696	Generation of eicosanoids	9.35435e-14	-1.21905	1	1	6.63223e-11	seurat_exp_5
7; Fc-epsilon-RI-signaling-pathway	Fc_epsilon_RI_signaling_pathway	C05952	Generation of eicosanoids	9.35435e-14	-1.21905	1	1	6.63223e-11	seurat_exp_5
8; Fc-epsilon-RI-signaling-pathway	Fc_epsilon_RI_signaling_pathway	C05951	Generation of eicosanoids	9.35435e-14	-1.21905	1	1	6.63223e-11	seurat_exp_5
9; Fc-epsilon-RI-signaling-pathway	Fc_epsilon_RI_signaling_pathway	C02166	Generation of eicosanoids	9.35435e-14	-1.21905	1	1	6.63223e-11	seurat_exp_5
28; C-type-lectin-receptor-signaling-pathway	C_type_lectin_receptor_signaling_pathway	IL12A	Th1 Th17 cell differentiation	7.61207e-13	-0.913379	1	1	5.39695e-10	seurat_exp_5
40; Toll-like-receptor-signaling-pathway	Toll_like_receptor_signaling_pathway	CCL5	Chemotactic effects ( Nutrophil, Immature DC )( NK cell )	1.18003e-12	-0.753144	1	1	8.36644e-10	seurat_exp_5
39; Toll-like-receptor-signaling-pathway	Toll_like_receptor_signaling_pathway	IL6	Inflammatory cytokines;Proinflammatory effects	2.97381e-12	-0.510823	1	1	2.10843e-09	seurat_exp_5
157; C-type-lectin-receptor-signaling-pathway	C_type_lectin_receptor_signaling_pathway	IL10	Th1 Th17 cell differentiation	6.63103e-12	-0.569208	1	1	4.7014e-09	seurat_exp_5
89; C-type-lectin-receptor-signaling-pathway	C_type_lectin_receptor_signaling_pathway	IL2	Th1 Th17 cell differentiation	7.52443e-12	-0.542761	1	1	5.33482e-09	seurat_exp_5
35; ErbB-signaling-pathway	ErbB_signaling_pathway	CBL	Receptor ubiquitylation;Degradation	1.35942e-11	-1.09745	1	1	9.63829e-09	seurat_exp_5
17; Rap1-signaling-pathway	Rap1_signaling_pathway	ACTB	Cell adhesion,migration,polarity	1.85975e-11	-0.864223	1	1	1.31856e-08	seurat_exp_5
164; C-type-lectin-receptor-signaling-pathway	C_type_lectin_receptor_signaling_pathway	EGR2	Th1 Th17 cell differentiation	2.0606e-11	-0.563195	1	1	1.46096e-08	seurat_exp_5
113; NF-kappa-B-signaling-pathway	NF_kappa_B_signaling_pathway	CFLAR	Survival	3.20932e-11	-0.716904	1	1	2.27541e-08	seurat_exp_5
7; Apoptosis	Apoptosis	ENDOG	DNA fragmentation; Apoptosis	3.50959e-11	-0.525205	1	1	2.4883e-08	seurat_exp_5
129; NF-kappa-B-signaling-pathway	NF_kappa_B_signaling_pathway	PTGS2	Inflammation	3.63552e-11	1.62708	1	1	2.57759e-08	seurat_exp_5
116; NF-kappa-B-signaling-pathway	NF_kappa_B_signaling_pathway	GADD45B	Survival	8.025e-11	0.780228	1	1	5.68972e-08	seurat_exp_5
48; ErbB-signaling-pathway	ErbB_signaling_pathway	CAMK2A	Cellular targets	1.02461e-10	-1.16452	1	1	7.26447e-08	seurat_exp_5
79; C-type-lectin-receptor-signaling-pathway	C_type_lectin_receptor_signaling_pathway	IL1B	Th1 Th17 cell differentiation	1.29642e-10	1.2098	1	1	9.19163e-08	seurat_exp_5
64; C-type-lectin-receptor-signaling-pathway	C_type_lectin_receptor_signaling_pathway	IL1B	Th1 Th17 cell differentiation	1.9677e-10	1.05834	1	1	1.3951e-07	seurat_exp_5
151; Endocrine-resistance	Endocrine_resistance	NCOR1	DNA; Low levels CoR; Transcription Proliferation	2.59886e-10	-0.532532	1	1	1.84259e-07	seurat_exp_5
50; NF-kappa-B-signaling-pathway	NF_kappa_B_signaling_pathway	NFKBIA	Negative feedback	6.16445e-10	0.521728	1	1	4.37059e-07	seurat_exp_5
142; NF-kappa-B-signaling-pathway	NF_kappa_B_signaling_pathway	NFKB2	Activation of noncanonical pathway	7.47363e-10	-1.32156	1	1	5.2988e-07	seurat_exp_5
29; Toll-like-receptor-signaling-pathway	Toll_like_receptor_signaling_pathway	CXCL8	Chemotactic effects ( Nutrophil, Immature DC )( NK cell )	6.50874e-09	3.07539	1	1	4.6147e-06	seurat_exp_5
2; NF-kappa-B-signaling-pathway	NF_kappa_B_signaling_pathway	BCL2L1	Survival	6.86369e-09	-1.05707	1	1	4.86636e-06	seurat_exp_5
57; ErbB-signaling-pathway	ErbB_signaling_pathway	ABL1		1.75227e-08	-1.02862	1	1	1.24236e-05	seurat_exp_5
3; NF-kappa-B-signaling-pathway	NF_kappa_B_signaling_pathway	BCL2	Survival	1.43016e-07	-0.781217	1	1	0.000101399	seurat_exp_5
67; Rap1-signaling-pathway	Rap1_signaling_pathway	AKT3	Proliferation survival gene activation	8.7675e-07	-0.54805	1	1	0.000621616	seurat_exp_5
72; Apoptosis	Apoptosis	BCL2A1	Pro-survival genes	1.38073e-06	0.931593	1	1	0.000978934	seurat_exp_5
131; NF-kappa-B-signaling-pathway	NF_kappa_B_signaling_pathway	CCL4L1	Inflammation	2.93866e-06	-1.51134	1	1	0.00208351	seurat_exp_5
130; NF-kappa-B-signaling-pathway	NF_kappa_B_signaling_pathway	TNF	Positive feedback	3.17138e-06	-1.5794	1	1	0.00224851	seurat_exp_5
51; NF-kappa-B-signaling-pathway	NF_kappa_B_signaling_pathway	TNFAIP3	Negative feedback	4.26955e-06	-1.0847	1	1	0.00302711	seurat_exp_5
12; Hippo-signaling-pathway	Hippo_signaling_pathway	CTGF	Anti-apoptotic genes; Pro-proliferation genes	5.38977e-06	-0.561198	1	1	0.00382134	seurat_exp_5
178; NOD-like-receptor-signaling-pathway	NOD_like_receptor_signaling_pathway	IL1B	Pro-inflammatory cytokines	5.71247e-06	0.670821	1	1	0.00405014	seurat_exp_5
52; NF-kappa-B-signaling-pathway	NF_kappa_B_signaling_pathway	TRAF1	Survival	1.29673e-05	-2.02787	1	1	0.00919384	seurat_exp_5
125; Endocrine-resistance	Endocrine_resistance	JUN	DNA; Transcription Proliferation	1.42462e-05	-0.734243	1	1	0.0101006	seurat_exp_5
49; Fc-gamma-R-mediated-phagocytosis	Fc_gamma_R_mediated_phagocytosis	ARF6	Phagocytosis; Membrane traficking; Particle internalization; Phagosome closure; Phagosome-lysosome fusion	1.72213e-05	-0.586878	1	1	0.0122099	seurat_exp_5
4; NF-kappa-B-signaling-pathway	NF_kappa_B_signaling_pathway	BIRC2	Survival	1.99797e-05	-1.94157	1	1	0.0141656	seurat_exp_5
56; C-type-lectin-receptor-signaling-pathway	C_type_lectin_receptor_signaling_pathway	IL6	Th2 cell differentiation	4.07581e-05	-1.38927	1	1	0.0288975	seurat_exp_5
64; Complement-and-coagulation-cascades	Complement_and_coagulation_cascades	VSIG4	Phagocytosis	4.78349e-05	-1.67499	1	1	0.0339149	seurat_exp_5
95; Rap1-signaling-pathway	Rap1_signaling_pathway	THBS1	Defective angiogensis	6.16203e-05	-1.02439	1	1	0.0436888	seurat_exp_5
77; Toll-like-receptor-signaling-pathway	Toll_like_receptor_signaling_pathway	CXCL9	Chemptactic effects ( T cell )	6.6468e-05	-1.52862	1	1	0.0471258	seurat_exp_5
1; JAK-STAT-signaling-pathway	JAK_STAT_signaling_pathway	MYC	Cell-cycle progression	2.19343e-88	0.709806	1	1	1.55514e-85	seurat_exp_6
121; MAPK-signaling-pathway	MAPK_signaling_pathway	MYC		1.44888e-52	0.503438	1	1	1.02726e-49	seurat_exp_6
26; cAMP-signaling-pathway	cAMP_signaling_pathway	C00076		4.05097e-43	0.618087	1	1	2.87214e-40	seurat_exp_6
64; Apoptosis	Apoptosis	TNFRSF10B	Pro-apoptotic genes	2.39902e-37	0.546429	1	1	1.70091e-34	seurat_exp_6
21; TGF-beta-signaling-pathway	TGF_beta_signaling_pathway	CDKN2B	G1 arrest	3.4888e-32	-0.599798	1	1	2.47356e-29	seurat_exp_6
54; AMPK-signaling-pathway	AMPK_signaling_pathway	SLC2A4	Activated mitochondrial biogeneses	7.07146e-32	0.58098	1	1	5.01366e-29	seurat_exp_6
118; cAMP-signaling-pathway	cAMP_signaling_pathway	MYL9	Relaxation (endothelial cell, smooth muscle cell)	6.70583e-27	-0.773936	1	1	4.75443e-24	seurat_exp_6
88; Hippo-signaling-pathway	Hippo_signaling_pathway	ID1	Anti-apoptotic genes; Pro-proliferation genes	4.36265e-26	-0.735084	1	1	3.09312e-23	seurat_exp_6
12; Insulin-signaling-pathway	Insulin_signaling_pathway	FASN	Lipogenesis; Lipid homeostasis	1.49083e-25	0.509576	1	1	1.057e-22	seurat_exp_6
112; cAMP-signaling-pathway	cAMP_signaling_pathway	GLI1	Downregulation of Hedgehog signaling (embryonic fibroblast)	1.68312e-25	-0.502716	1	1	1.19333e-22	seurat_exp_6
56; mTOR-signaling-pathway	mTOR_signaling_pathway	EIF4B	Cap-dependent translocation; Protein systhesis	1.87606e-22	0.555135	1	1	1.33012e-19	seurat_exp_6
159; C-type-lectin-receptor-signaling-pathway	C_type_lectin_receptor_signaling_pathway	PTGS2	Th1 Th17 cell differentiation	6.0541e-21	0.543744	1	1	4.29236e-18	seurat_exp_6
53; mTOR-signaling-pathway	mTOR_signaling_pathway	GRB10	Lipolysis	2.94703e-20	0.577035	1	1	2.08945e-17	seurat_exp_6
35; Wnt-signaling-pathway	Wnt_signaling_pathway	JUN		1.01935e-19	-0.615138	1	1	7.22716e-17	seurat_exp_6
25; VEGF-signaling-pathway	VEGF_signaling_pathway	PXN	Focal adhesion turnover; Migration	4.24251e-19	0.674454	1	1	3.00794e-16	seurat_exp_6
125; Endocrine-resistance	Endocrine_resistance	JUN	DNA; Transcription Proliferation	1.68451e-18	-1.12018	1	1	1.19432e-15	seurat_exp_6
21; Toll-like-receptor-signaling-pathway	Toll_like_receptor_signaling_pathway	IFNA1	Antiviral effects	2.7486e-18	1.05451	1	1	1.94876e-15	seurat_exp_6
108; MAPK-signaling-pathway	MAPK_signaling_pathway	JUN	DNA; Proliferation differentiation, inflammation	7.32322e-18	-0.701288	1	1	5.19216e-15	seurat_exp_6
126; Endocrine-resistance	Endocrine_resistance	FOS	DNA; Transcription Proliferation	1.65744e-17	-1.27324	1	1	1.17513e-14	seurat_exp_6
155; Chemokine-signaling-pathway	Chemokine_signaling_pathway	PXN	Migration	4.7516e-17	0.736211	1	1	3.36889e-14	seurat_exp_6
34; TGF-beta-signaling-pathway	TGF_beta_signaling_pathway	ROCK1		1.67588e-16	-0.571186	1	1	1.1882e-13	seurat_exp_6
60; Hippo-signaling-pathway	Hippo_signaling_pathway	CTGF	Anti-apoptotic genes; Pro-proliferation genes	5.77271e-16	-0.817115	1	1	4.09285e-13	seurat_exp_6
13; VEGF-signaling-pathway	VEGF_signaling_pathway	C01312	PGI2production	3.19932e-15	0.662743	1	1	2.26832e-12	seurat_exp_6
54; RIG-I-like-receptor-signaling-pathway	RIG_I_like_receptor_signaling_pathway	CXCL10	Inflammatory cytokines; Protein synthesis; Growth arrest; Dendrition cell activation; NK cell activation; Antibody production; Apoptosis	3.59024e-15	-0.84676	1	1	2.54548e-12	seurat_exp_6
20; Toll-like-receptor-signaling-pathway	Toll_like_receptor_signaling_pathway	IFNB1	Antiviral effects	6.85312e-14	0.95632	1	1	4.85886e-11	seurat_exp_6
107; MAPK-signaling-pathway	MAPK_signaling_pathway	JUND	DNA; Proliferation differentiation, inflammation	1.68739e-13	-0.557183	1	1	1.19636e-10	seurat_exp_6
56; ErbB-signaling-pathway	ErbB_signaling_pathway	JUN	DNA; Angiogenesis	5.14344e-13	-2.49419	1	1	3.6467e-10	seurat_exp_6
28; C-type-lectin-receptor-signaling-pathway	C_type_lectin_receptor_signaling_pathway	IL12A	Th1 Th17 cell differentiation	9.5519e-13	1.74102	1	1	6.77229e-10	seurat_exp_6
161; C-type-lectin-receptor-signaling-pathway	C_type_lectin_receptor_signaling_pathway	CCL17	Th2 cell differentiation	8.63959e-12	1.38965	1	1	6.12547e-09	seurat_exp_6
119; MAPK-signaling-pathway	MAPK_signaling_pathway	FOS	DNA; Proliferation differentiation	1.30764e-11	-0.9904	1	1	9.27115e-09	seurat_exp_6
148; C-type-lectin-receptor-signaling-pathway	C_type_lectin_receptor_signaling_pathway	IL1B	Th1 Th17 cell differentiation	1.45327e-11	3.68929	1	1	1.03037e-08	seurat_exp_6
79; Hippo-signaling-pathway	Hippo_signaling_pathway	SNAI2	Anti-apoptotic genes; Pro-proliferation genes	4.43251e-11	-0.532644	1	1	3.14265e-08	seurat_exp_6
77; Hippo-signaling-pathway	Hippo_signaling_pathway	CCND1	Anti-apoptotic genes; Pro-proliferation genes	5.76934e-11	-0.682292	1	1	4.09046e-08	seurat_exp_6
12; Hippo-signaling-pathway	Hippo_signaling_pathway	CTGF	Anti-apoptotic genes; Pro-proliferation genes	1.5007e-10	-0.604019	1	1	1.064e-07	seurat_exp_6
110; cAMP-signaling-pathway	cAMP_signaling_pathway	FOS	Hyperexcitability cell death/survival(hippocampal neuron)	3.25494e-10	-0.720347	1	1	2.30775e-07	seurat_exp_6
54; NF-kappa-B-signaling-pathway	NF_kappa_B_signaling_pathway	CCL13	Lymphoid-tissue homing	7.63946e-10	3.921	1	1	5.41637e-07	seurat_exp_6
137; NF-kappa-B-signaling-pathway	NF_kappa_B_signaling_pathway	ICAM1	Lymphocyte adhesion, T-cell costimulation	7.9245e-10	4.9898	1	1	5.61847e-07	seurat_exp_6
86; Apoptosis	Apoptosis	BCL2L11	Pro-apoptotic genes	9.03475e-10	-0.836074	1	1	6.40564e-07	seurat_exp_6
78; NOD-like-receptor-signaling-pathway	NOD_like_receptor_signaling_pathway	IFNA1	IFN-stimulated genes	1.07751e-09	0.674807	1	1	7.63956e-07	seurat_exp_6
78; Hippo-signaling-pathway	Hippo_signaling_pathway	SOX2	Anti-apoptotic genes; Pro-proliferation genes	6.53105e-09	-0.616754	1	1	4.63052e-06	seurat_exp_6
84; Apoptosis	Apoptosis	FAS	Pro-apoptotic genes	8.94355e-09	-0.855453	1	1	6.34098e-06	seurat_exp_6
75; Hippo-signaling-pathway	Hippo_signaling_pathway	NKD1	Anti-apoptotic genes; Pro-proliferation genes	1.85249e-08	-0.61033	1	1	1.31342e-05	seurat_exp_6
85; Apoptosis	Apoptosis	FASLG	Pro-apoptotic genes	2.49813e-08	-0.845373	1	1	1.77117e-05	seurat_exp_6
178; NOD-like-receptor-signaling-pathway	NOD_like_receptor_signaling_pathway	IL1B	Pro-inflammatory cytokines	6.19536e-08	2.07283	1	1	4.39251e-05	seurat_exp_6
160; C-type-lectin-receptor-signaling-pathway	C_type_lectin_receptor_signaling_pathway	CCL22	Th2 cell differentiation	1.96668e-07	1.88249	1	1	0.000139437	seurat_exp_6
35; ErbB-signaling-pathway	ErbB_signaling_pathway	CBL	Receptor ubiquitylation;Degradation	3.97918e-07	-1.45973	1	1	0.000282124	seurat_exp_6
171; NOD-like-receptor-signaling-pathway	NOD_like_receptor_signaling_pathway	TNF	Pro-inflammatory cytokines	4.23916e-07	1.26172	1	1	0.000300557	seurat_exp_6
20; Cell-cycle	Cell_cycle	MCM2	DNA; DNA biosynthesis	5.20384e-07	-0.954862	1	1	0.000368952	seurat_exp_6
164; cGMP-PKG-signaling-pathway	cGMP_PKG_signaling_pathway	PPIF	Cardioprotection	5.73224e-07	-0.814917	1	1	0.000406416	seurat_exp_6
145; Endocrine-resistance	Endocrine_resistance	FOS	DNA; CoA overexpression AP1/SP1 overexpression; Transcription Proliferation	7.15715e-07	-0.757504	1	1	0.000507442	seurat_exp_6
55; C-type-lectin-receptor-signaling-pathway	C_type_lectin_receptor_signaling_pathway	IL10	Th2 cell differentiation	8.40607e-07	0.867204	1	1	0.000595991	seurat_exp_6
168; C-type-lectin-receptor-signaling-pathway	C_type_lectin_receptor_signaling_pathway	IL12A	Th1 Th17 cell differentiation	1.11049e-06	-1.53416	1	1	0.00078734	seurat_exp_6
136; NF-kappa-B-signaling-pathway	NF_kappa_B_signaling_pathway	TNFSF13B	B-cell development; B-cell survival	1.15769e-06	3.41406	1	1	0.000820801	seurat_exp_6
172; NOD-like-receptor-signaling-pathway	NOD_like_receptor_signaling_pathway	CXCL8	Chemokines	1.18151e-06	1.63658	1	1	0.00083769	seurat_exp_6
40; TNF-signaling-pathway	TNF_signaling_pathway	JUN		1.3834e-06	1.02823	1	1	0.000980834	seurat_exp_6
83; Apoptosis	Apoptosis	TP53	Pro-apoptotic genes	1.73412e-06	-0.893308	1	1	0.00122949	seurat_exp_6
74; Hippo-signaling-pathway	Hippo_signaling_pathway	AXIN1	Anti-apoptotic genes; Pro-proliferation genes	2.515e-06	-0.633128	1	1	0.00178313	seurat_exp_6
170; NOD-like-receptor-signaling-pathway	NOD_like_receptor_signaling_pathway	IL6	Pro-inflammatory cytokines	3.65497e-06	1.69787	1	1	0.00259137	seurat_exp_6
173; NOD-like-receptor-signaling-pathway	NOD_like_receptor_signaling_pathway	CXCL1	Chemokines	5.85322e-06	1.64804	1	1	0.00414993	seurat_exp_6
135; NF-kappa-B-signaling-pathway	NF_kappa_B_signaling_pathway	CCL19	Lymphoid-tissue homing	8.76049e-06	7.19825	1	1	0.00621118	seurat_exp_6
119; MAPK-signaling-pathway	MAPK_signaling_pathway	FOS	DNA; Proliferation differentiation	1.63233e-85	1.83247	1	1	1.15732e-82	seurat_exp_7
110; cAMP-signaling-pathway	cAMP_signaling_pathway	FOS	Hyperexcitability cell death/survival(hippocampal neuron)	9.99855e-85	1.36798	1	1	7.08897e-82	seurat_exp_7
126; Endocrine-resistance	Endocrine_resistance	FOS	DNA; Transcription Proliferation	1.51367e-78	1.80213	1	1	1.07319e-75	seurat_exp_7
83; Apoptosis	Apoptosis	TP53	Pro-apoptotic genes	4.18361e-70	2.1829	1	1	2.96618e-67	seurat_exp_7
145; Endocrine-resistance	Endocrine_resistance	FOS	DNA; CoA overexpression AP1/SP1 overexpression; Transcription Proliferation	8.90472e-70	1.49756	1	1	6.31345e-67	seurat_exp_7
56; ErbB-signaling-pathway	ErbB_signaling_pathway	JUN	DNA; Angiogenesis	3.72741e-66	2.14534	1	1	2.64273e-63	seurat_exp_7
76; Endocrine-resistance	Endocrine_resistance	NOTCH1	Migration Invasion	2.02671e-63	0.670862	1	1	1.43694e-60	seurat_exp_7
85; Apoptosis	Apoptosis	FASLG	Pro-apoptotic genes	4.46139e-63	1.65738	1	1	3.16313e-60	seurat_exp_7
69; MAPK-signaling-pathway	MAPK_signaling_pathway	HSPB1	DNA; Proliferation differentiation, inflammation	9.30425e-63	1.70118	1	1	6.59671e-60	seurat_exp_7
84; Apoptosis	Apoptosis	FAS	Pro-apoptotic genes	3.06051e-60	1.86599	1	1	2.1699e-57	seurat_exp_7
114; Apoptosis	Apoptosis	HRK	Pro-apoptotic genes	3.20192e-56	1.5564	1	1	2.27016e-53	seurat_exp_7
86; Apoptosis	Apoptosis	BCL2L11	Pro-apoptotic genes	6.34675e-56	1.89191	1	1	4.49984e-53	seurat_exp_7
112; cAMP-signaling-pathway	cAMP_signaling_pathway	GLI1	Downregulation of Hedgehog signaling (embryonic fibroblast)	1.02912e-54	0.780134	1	1	7.29646e-52	seurat_exp_7
107; MAPK-signaling-pathway	MAPK_signaling_pathway	JUND	DNA; Proliferation differentiation, inflammation	1.74304e-54	1.04716	1	1	1.23581e-51	seurat_exp_7
114; cAMP-signaling-pathway	cAMP_signaling_pathway	HHIP	Downregulation of Hedgehog signaling (embryonic fibroblast)	2.10622e-54	0.774362	1	1	1.49331e-51	seurat_exp_7
108; MAPK-signaling-pathway	MAPK_signaling_pathway	JUN	DNA; Proliferation differentiation, inflammation	2.15514e-48	1.00071	1	1	1.528e-45	seurat_exp_7
7; T-cell-receptor-signaling-pathway	T_cell_receptor_signaling_pathway	CSF2	Proliferation Differentation; Immuno response	6.41462e-48	1.42126	1	1	4.54797e-45	seurat_exp_7
40; TNF-signaling-pathway	TNF_signaling_pathway	JUN		9.27874e-48	1.02406	1	1	6.57863e-45	seurat_exp_7
35; Wnt-signaling-pathway	Wnt_signaling_pathway	JUN		2.80441e-47	0.796125	1	1	1.98833e-44	seurat_exp_7
11; T-cell-receptor-signaling-pathway	T_cell_receptor_signaling_pathway	IL4	Proliferation Differentation; Immuno response	3.71899e-47	1.51543	1	1	2.63676e-44	seurat_exp_7
9; T-cell-receptor-signaling-pathway	T_cell_receptor_signaling_pathway	IL10	Proliferation Differentation; Immuno response	2.68208e-46	1.42205	1	1	1.90159e-43	seurat_exp_7
10; T-cell-receptor-signaling-pathway	T_cell_receptor_signaling_pathway	IL5	Proliferation Differentation; Immuno response	2.7348e-46	1.50442	1	1	1.93898e-43	seurat_exp_7
12; T-cell-receptor-signaling-pathway	T_cell_receptor_signaling_pathway	IL2	Proliferation Differentation; Immuno response	2.84061e-46	1.41591	1	1	2.01399e-43	seurat_exp_7
8; T-cell-receptor-signaling-pathway	T_cell_receptor_signaling_pathway	IFNG	Proliferation Differentation; Immuno response	1.08955e-44	1.39856	1	1	7.72491e-42	seurat_exp_7
57; ErbB-signaling-pathway	ErbB_signaling_pathway	ABL1		2.18738e-44	1.56131	1	1	1.55085e-41	seurat_exp_7
48; ErbB-signaling-pathway	ErbB_signaling_pathway	CAMK2A	Cellular targets	8.55802e-44	1.58331	1	1	6.06763e-41	seurat_exp_7
11; HIF-1-signaling-pathway	HIF_1_signaling_pathway	SLC2A1	Reduce oxygen consumption; Promote anaerobic metabolism	1.0854e-43	1.57402	1	1	7.69547e-41	seurat_exp_7
6; T-cell-receptor-signaling-pathway	T_cell_receptor_signaling_pathway	TNF	Proliferation Differentation; Immuno response	4.62593e-43	1.09735	1	1	3.27978e-40	seurat_exp_7
35; ErbB-signaling-pathway	ErbB_signaling_pathway	CBL	Receptor ubiquitylation;Degradation	3.56607e-42	1.4456	1	1	2.52835e-39	seurat_exp_7
47; ErbB-signaling-pathway	ErbB_signaling_pathway	PRKCA	Cellular targets	4.90527e-42	1.53648	1	1	3.47784e-39	seurat_exp_7
116; EGFR-tyrosine-kinase-inhibitor-resistance	EGFR_tyrosine_kinase_inhibitor_resistance	STAT3	Abnormal dimerization of STAT 3; DNA; Differentiation; Growth; Proliferation; Survival; Motility; Angiogenesis	2.26147e-41	0.775673	1	1	1.60338e-38	seurat_exp_7
33; HIF-1-signaling-pathway	HIF_1_signaling_pathway	C00186	Lactate	1.03105e-40	0.759677	1	1	7.31015e-38	seurat_exp_7
40; ErbB-signaling-pathway	ErbB_signaling_pathway	ELK1	DNA; Angiogenesis	1.10742e-40	1.56189	1	1	7.85161e-38	seurat_exp_7
51; Hedgehog-signaling-pathway	Hedgehog_signaling_pathway	CCND1	Activiation of Hh target genes; Cell prolifeation tissue patterning stem cell maintenance,	5.5789e-40	0.999836	1	1	3.95544e-37	seurat_exp_7
24; B-cell-receptor-signaling-pathway	B_cell_receptor_signaling_pathway	FOS	DNA; B cell ontogeny; Autoimmunity; Anergy; Immuno response Ig production GC formation	1.94316e-39	1.1656	1	1	1.3777e-36	seurat_exp_7
43; ErbB-signaling-pathway	ErbB_signaling_pathway	PTK2	Adhesion Migration	1.53748e-38	1.60855	1	1	1.09008e-35	seurat_exp_7
31; Hedgehog-signaling-pathway	Hedgehog_signaling_pathway	GLI1	Respression of Hh target genes; Cell prolifeation tissue patterning stem cell maintenance, development, ect	1.77138e-38	1.06867	1	1	1.25591e-35	seurat_exp_7
86; Toll-like-receptor-signaling-pathway	Toll_like_receptor_signaling_pathway	IL12A	Inflammatory cytokines;Proinflammatory effects	1.02198e-36	0.899789	1	1	7.24586e-34	seurat_exp_7
168; C-type-lectin-receptor-signaling-pathway	C_type_lectin_receptor_signaling_pathway	IL12A	Th1 Th17 cell differentiation	4.93455e-36	1.87565	1	1	3.4986e-33	seurat_exp_7
125; Endocrine-resistance	Endocrine_resistance	JUN	DNA; Transcription Proliferation	7.02775e-36	0.699446	1	1	4.98267e-33	seurat_exp_7
12; p53-signaling-pathway	p53_signaling_pathway	CCNE1	G1 arrest( sustaines); Cell cycle arrest	1.01731e-35	-0.660658	1	1	7.2127e-33	seurat_exp_7
69; Apoptosis	Apoptosis	PTPN13	Pro-survival genes	1.44532e-35	1.12191	1	1	1.02473e-32	seurat_exp_7
22; ErbB-signaling-pathway	ErbB_signaling_pathway	EIF4EBP1	Protein synthesis	8.68029e-34	-0.556493	1	1	6.15432e-31	seurat_exp_7
38; TNF-signaling-pathway	TNF_signaling_pathway	CEBPB		1.91805e-33	0.713077	1	1	1.3599e-30	seurat_exp_7
5; T-cell-receptor-signaling-pathway	T_cell_receptor_signaling_pathway	CDK4	Proliferation Differentation; Immuno response	1.0967e-32	1.32018	1	1	7.77559e-30	seurat_exp_7
74; PPAR-signaling-pathway	PPAR_signaling_pathway	DBI	Fatty acid transport; Lipid metabolism	4.92937e-32	0.866478	1	1	3.49493e-29	seurat_exp_7
29; ErbB-signaling-pathway	ErbB_signaling_pathway	STAT5A	DNA; Survival	8.79115e-32	1.20827	1	1	6.23292e-29	seurat_exp_7
3; ErbB-signaling-pathway	ErbB_signaling_pathway	ELK1	DNA; Migration/ Invasion	1.10188e-31	1.33171	1	1	7.81236e-29	seurat_exp_7
46; Toll-like-receptor-signaling-pathway	Toll_like_receptor_signaling_pathway	TNF	Inflammatory cytokines;Proinflammatory effects	1.17945e-31	0.853699	1	1	8.36231e-29	seurat_exp_7
113; cAMP-signaling-pathway	cAMP_signaling_pathway	PTCH1	Downregulation of Hedgehog signaling (embryonic fibroblast)	3.2971e-31	0.542577	1	1	2.33765e-28	seurat_exp_7
33; Hedgehog-signaling-pathway	Hedgehog_signaling_pathway	HHIP	Respression of Hh target genes; Cell prolifeation tissue patterning stem cell maintenance, development, ect	3.7341e-31	0.624153	1	1	2.64748e-28	seurat_exp_7
56; MAPK-signaling-pathway	MAPK_signaling_pathway	TP53	p53 signaling pathway; Proliferation differentiation, inflammation	4.53051e-30	0.866758	1	1	3.21213e-27	seurat_exp_7
164; cGMP-PKG-signaling-pathway	cGMP_PKG_signaling_pathway	PPIF	Cardioprotection	5.5287e-30	0.728978	1	1	3.91985e-27	seurat_exp_7
87; Toll-like-receptor-signaling-pathway	Toll_like_receptor_signaling_pathway	CCL4L1	Chemotactic effects ( Nutrophil, Immature DC )( NK cell )	5.21471e-29	0.727817	1	1	3.69723e-26	seurat_exp_7
76; Toll-like-receptor-signaling-pathway	Toll_like_receptor_signaling_pathway	CCL3L3	Chemotactic effects ( Nutrophil, Immature DC )( NK cell )	1.92895e-28	0.851749	1	1	1.36762e-25	seurat_exp_7
15; MAPK-signaling-pathway	MAPK_signaling_pathway	NFKB1	Proliferation inflammation anti-apoptosis	2.05042e-27	0.596639	1	1	1.45375e-24	seurat_exp_7
111; cAMP-signaling-pathway	cAMP_signaling_pathway	JUN	Hyperexcitability cell death/survival(hippocampal neuron)	6.91621e-27	0.584188	1	1	4.90359e-24	seurat_exp_7
39; Toll-like-receptor-signaling-pathway	Toll_like_receptor_signaling_pathway	IL6	Inflammatory cytokines;Proinflammatory effects	7.33295e-26	0.688376	1	1	5.19906e-23	seurat_exp_7
70; Apoptosis	Apoptosis	CFLAR	Pro-survival genes	2.03235e-25	0.605106	1	1	1.44094e-22	seurat_exp_7
62; Apoptosis	Apoptosis	TP53AIP1	Pro-apoptotic genes	4.36824e-25	0.758957	1	1	3.09709e-22	seurat_exp_7
16; VEGF-signaling-pathway	VEGF_signaling_pathway	HSPB1	Action reorganization; Migration	8.59284e-25	0.751505	1	1	6.09232e-22	seurat_exp_7
12; Toll-like-receptor-signaling-pathway	Toll_like_receptor_signaling_pathway	NFKB1	Degradation	8.68322e-25	0.852169	1	1	6.1564e-22	seurat_exp_7
142; NF-kappa-B-signaling-pathway	NF_kappa_B_signaling_pathway	NFKB2	Activation of noncanonical pathway	3.13848e-24	-0.871077	1	1	2.22518e-21	seurat_exp_7
50; NF-kappa-B-signaling-pathway	NF_kappa_B_signaling_pathway	NFKBIA	Negative feedback	2.15878e-23	-1.22338	1	1	1.53058e-20	seurat_exp_7
95; Endocrine-resistance	Endocrine_resistance	E2F1	Cell cycle progression	3.73487e-23	-0.591295	1	1	2.64803e-20	seurat_exp_7
113; NF-kappa-B-signaling-pathway	NF_kappa_B_signaling_pathway	CFLAR	Survival	4.32304e-23	-0.559308	1	1	3.06503e-20	seurat_exp_7
89; HIF-1-signaling-pathway	HIF_1_signaling_pathway	CDKN1A	Reduce oxygen consumption; Regulate proliferation and apoptosis	5.18836e-23	0.662022	1	1	3.67855e-20	seurat_exp_7
100; Ras-signaling-pathway	Ras_signaling_pathway	REL	Gene expression	6.55097e-23	1.01691	1	1	4.64464e-20	seurat_exp_7
21; TGF-beta-signaling-pathway	TGF_beta_signaling_pathway	CDKN2B	G1 arrest	1.43379e-22	0.636697	1	1	1.01656e-19	seurat_exp_7
51; NF-kappa-B-signaling-pathway	NF_kappa_B_signaling_pathway	TNFAIP3	Negative feedback	9.61468e-22	-1.05605	1	1	6.81681e-19	seurat_exp_7
71; Apoptosis	Apoptosis	GADD45G	Pro-survival genes	9.67437e-22	0.695387	1	1	6.85913e-19	seurat_exp_7
23; ErbB-signaling-pathway	ErbB_signaling_pathway	RPS6KB1	Protein synthesis	1.33058e-21	1.27302	1	1	9.43384e-19	seurat_exp_7
2; NF-kappa-B-signaling-pathway	NF_kappa_B_signaling_pathway	BCL2L1	Survival	6.56988e-21	-0.700024	1	1	4.65805e-18	seurat_exp_7
52; NF-kappa-B-signaling-pathway	NF_kappa_B_signaling_pathway	TRAF1	Survival	8.6705e-21	-1.41488	1	1	6.14739e-18	seurat_exp_7
26; Cytosolic-DNA-sensing-pathway	Cytosolic_DNA_sensing_pathway	IL33	Proinflammatory cytokine processing;Pyroptosis	4.76406e-20	0.920976	1	1	3.37772e-17	seurat_exp_7
169; NOD-like-receptor-signaling-pathway	NOD_like_receptor_signaling_pathway	IL18	Pro-inflammatory cytokines	6.04805e-20	0.709357	1	1	4.28807e-17	seurat_exp_7
24; Ras-signaling-pathway	Ras_signaling_pathway	PLD1	Endocytosis	2.73016e-19	0.829388	1	1	1.93568e-16	seurat_exp_7
65; ErbB-signaling-pathway	ErbB_signaling_pathway	MYC	DNA; Adhesion	3.15507e-19	1.03156	1	1	2.23695e-16	seurat_exp_7
130; NF-kappa-B-signaling-pathway	NF_kappa_B_signaling_pathway	TNF	Positive feedback	6.27614e-19	-1.14196	1	1	4.44978e-16	seurat_exp_7
129; NF-kappa-B-signaling-pathway	NF_kappa_B_signaling_pathway	PTGS2	Inflammation	7.3763e-19	-1.04674	1	1	5.2298e-16	seurat_exp_7
55; MAPK-signaling-pathway	MAPK_signaling_pathway	ELK4	DNA; Proliferation differentiation, inflammation	1.27476e-18	0.648059	1	1	9.03806e-16	seurat_exp_7
54; AMPK-signaling-pathway	AMPK_signaling_pathway	SLC2A4	Activated mitochondrial biogeneses	3.64258e-18	-0.578517	1	1	2.58259e-15	seurat_exp_7
24; p53-signaling-pathway	p53_signaling_pathway	SERPINB5	Inflammhibition of angiogenesis and metastasis	6.50426e-18	0.667139	1	1	4.61152e-15	seurat_exp_7
133; NF-kappa-B-signaling-pathway	NF_kappa_B_signaling_pathway	CXCL2	Inflammation	7.20176e-18	-0.736751	1	1	5.10605e-15	seurat_exp_7
48; Rap1-signaling-pathway	Rap1_signaling_pathway	PARD3	Cell adhesion,migration,polarity	7.92341e-18	0.998756	1	1	5.61769e-15	seurat_exp_7
114; NF-kappa-B-signaling-pathway	NF_kappa_B_signaling_pathway	BCL2A1	Survival	9.7728e-18	-0.924513	1	1	6.92892e-15	seurat_exp_7
131; NF-kappa-B-signaling-pathway	NF_kappa_B_signaling_pathway	CCL4L1	Inflammation	2.11037e-17	-1.32977	1	1	1.49625e-14	seurat_exp_7
17; p53-signaling-pathway	p53_signaling_pathway	TP73	p53 negative feedback	2.28646e-17	0.702293	1	1	1.6211e-14	seurat_exp_7
79; Hippo-signaling-pathway	Hippo_signaling_pathway	SNAI2	Anti-apoptotic genes; Pro-proliferation genes	2.67723e-17	0.603944	1	1	1.89816e-14	seurat_exp_7
53; MAPK-signaling-pathway	MAPK_signaling_pathway	MAX	DNA; Proliferation differentiation, inflammation	3.83822e-17	0.529939	1	1	2.7213e-14	seurat_exp_7
116; NF-kappa-B-signaling-pathway	NF_kappa_B_signaling_pathway	GADD45B	Survival	3.9315e-17	-1.12832	1	1	2.78743e-14	seurat_exp_7
44; RIG-I-like-receptor-signaling-pathway	RIG_I_like_receptor_signaling_pathway	MAPK8	DNA;Type 1 interfeons; Protein synthesis; Growth arrest; Dendrition cell activation; NK cell activation; Antibody production; Apoptosis	4.64571e-17	0.606664	1	1	3.29381e-14	seurat_exp_7
23; p53-signaling-pathway	p53_signaling_pathway	PTEN	Inhibition of IGF-1/mTOR pathway	8.29875e-17	0.515394	1	1	5.88381e-14	seurat_exp_7
4; NF-kappa-B-signaling-pathway	NF_kappa_B_signaling_pathway	BIRC2	Survival	1.01255e-16	-1.50093	1	1	7.17897e-14	seurat_exp_7
41; Ras-signaling-pathway	Ras_signaling_pathway	RAC1		1.04754e-16	0.520376	1	1	7.42703e-14	seurat_exp_7
56; C-type-lectin-receptor-signaling-pathway	C_type_lectin_receptor_signaling_pathway	IL6	Th2 cell differentiation	1.36615e-16	-1.27301	1	1	9.68601e-14	seurat_exp_7
128; NF-kappa-B-signaling-pathway	NF_kappa_B_signaling_pathway	IL1B	Positive feedback	3.56508e-16	-1.849	1	1	2.52764e-13	seurat_exp_7
20; Cell-cycle	Cell_cycle	MCM2	DNA; DNA biosynthesis	3.75788e-16	-2.72953	1	1	2.66434e-13	seurat_exp_7
38; Fc-gamma-R-mediated-phagocytosis	Fc_gamma_R_mediated_phagocytosis	CFL1	Phagocytosis; Membrane traficking; Particle internalization; Phagosome closure; Phagosome-lysosome fusion	1.03853e-15	-0.544941	1	1	7.36321e-13	seurat_exp_7
52; PPAR-signaling-pathway	PPAR_signaling_pathway	ANGPTL4	Adipocyte differentiation	1.38485e-15	0.569032	1	1	9.81858e-13	seurat_exp_7
132; NF-kappa-B-signaling-pathway	NF_kappa_B_signaling_pathway	VCAM1	Inflammation	1.85593e-15	-0.597771	1	1	1.31586e-12	seurat_exp_7
132; EGFR-tyrosine-kinase-inhibitor-resistance	EGFR_tyrosine_kinase_inhibitor_resistance	EIF4E	Protein synthesis; Differentiation; Growth; Proliferation; Survival; Motility; Angiogenesis	8.41668e-15	0.721072	1	1	5.96743e-12	seurat_exp_7
11; Apoptosis	Apoptosis	DFFB	DNA fragmentation; Apoptosis	9.85568e-15	-0.50958	1	1	6.98768e-12	seurat_exp_7
53; NF-kappa-B-signaling-pathway	NF_kappa_B_signaling_pathway	CXCL8	Survival	1.80561e-14	-2.74833	1	1	1.28018e-11	seurat_exp_7
22; C-type-lectin-receptor-signaling-pathway	C_type_lectin_receptor_signaling_pathway	IL23A	Th2 cell differentiation	9.19917e-14	-1.19204	1	1	6.52221e-11	seurat_exp_7
57; C-type-lectin-receptor-signaling-pathway	C_type_lectin_receptor_signaling_pathway	IL12A	Th2 cell differentiation	9.63806e-14	-1.19249	1	1	6.83339e-11	seurat_exp_7
55; NF-kappa-B-signaling-pathway	NF_kappa_B_signaling_pathway	CXCL12	Myeloiesis and B-cell lymphopoieses	1.28166e-13	0.585784	1	1	9.08699e-11	seurat_exp_7
45; RIG-I-like-receptor-signaling-pathway	RIG_I_like_receptor_signaling_pathway	MAPK14	DNA; Inflammatory cytokines; Protein synthesis; Growth arrest; Dendrition cell activation; NK cell activation; Antibody production; Apoptosis	7.73159e-13	0.575218	1	1	5.48169e-10	seurat_exp_7
157; C-type-lectin-receptor-signaling-pathway	C_type_lectin_receptor_signaling_pathway	IL10	Th1 Th17 cell differentiation	1.0944e-12	0.712439	1	1	7.75928e-10	seurat_exp_7
20; NOD-like-receptor-signaling-pathway	NOD_like_receptor_signaling_pathway	IL18		1.36805e-12	1.66966	1	1	9.69951e-10	seurat_exp_7
89; C-type-lectin-receptor-signaling-pathway	C_type_lectin_receptor_signaling_pathway	IL2	Th1 Th17 cell differentiation	1.55462e-12	0.710761	1	1	1.10223e-09	seurat_exp_7
5; Cytosolic-DNA-sensing-pathway	Cytosolic_DNA_sensing_pathway	IL18	Proinflammatory cytokine processing;Pyroptosis	2.09168e-12	0.644951	1	1	1.483e-09	seurat_exp_7
88; Hippo-signaling-pathway	Hippo_signaling_pathway	ID1	Anti-apoptotic genes; Pro-proliferation genes	2.49028e-12	0.549547	1	1	1.76561e-09	seurat_exp_7
3; NF-kappa-B-signaling-pathway	NF_kappa_B_signaling_pathway	BCL2	Survival	4.01426e-12	-0.574373	1	1	2.84611e-09	seurat_exp_7
159; C-type-lectin-receptor-signaling-pathway	C_type_lectin_receptor_signaling_pathway	PTGS2	Th1 Th17 cell differentiation	8.25709e-12	0.596755	1	1	5.85428e-09	seurat_exp_7
67; Rap1-signaling-pathway	Rap1_signaling_pathway	AKT3	Proliferation survival gene activation	2.44956e-10	0.678331	1	1	1.73674e-07	seurat_exp_7
59; Ras-signaling-pathway	Ras_signaling_pathway	STK4	Apoptosis; Cell-cycle arrest	4.41171e-10	0.621356	1	1	3.1279e-07	seurat_exp_7
172; NOD-like-receptor-signaling-pathway	NOD_like_receptor_signaling_pathway	CXCL8	Chemokines	1.16505e-08	-0.659422	1	1	8.26022e-06	seurat_exp_7
135; NF-kappa-B-signaling-pathway	NF_kappa_B_signaling_pathway	CCL19	Lymphoid-tissue homing	5.04423e-08	-2.90094	1	1	3.57636e-05	seurat_exp_7
54; RIG-I-like-receptor-signaling-pathway	RIG_I_like_receptor_signaling_pathway	CXCL10	Inflammatory cytokines; Protein synthesis; Growth arrest; Dendrition cell activation; NK cell activation; Antibody production; Apoptosis	3.79227e-07	-1.98754	1	1	0.000268872	seurat_exp_7
61; Complement-and-coagulation-cascades	Complement_and_coagulation_cascades	CR2		7.29007e-07	0.983169	1	1	0.000516866	seurat_exp_7
57; MAPK-signaling-pathway	MAPK_signaling_pathway	ELK1	p53 signaling pathway; Proliferation differentiation, inflammation	8.23135e-07	0.557765	1	1	0.000583603	seurat_exp_7
134; NF-kappa-B-signaling-pathway	NF_kappa_B_signaling_pathway	CCL21	Lymphoid-tissue homing	9.84667e-07	-0.585022	1	1	0.000698129	seurat_exp_7
19; NOD-like-receptor-signaling-pathway	NOD_like_receptor_signaling_pathway	IL1B		6.78936e-06	-1.29825	1	1	0.00481365	seurat_exp_7
27; p53-signaling-pathway	p53_signaling_pathway	THBS1	Inflammhibition of angiogenesis and metastasis	1.3818e-101	1.72236	1	1	9.79693e-99	seurat_exp_8
95; Rap1-signaling-pathway	Rap1_signaling_pathway	THBS1	Defective angiogensis	7.71057e-78	2.29248	1	1	5.4668e-75	seurat_exp_8
60; Hippo-signaling-pathway	Hippo_signaling_pathway	CTGF	Anti-apoptotic genes; Pro-proliferation genes	9.00493e-78	1.91432	1	1	6.38449e-75	seurat_exp_8
16; cGMP-PKG-signaling-pathway	cGMP_PKG_signaling_pathway	MYL9	Smooth muscle relaxation	2.89227e-55	0.920208	1	1	2.05062e-52	seurat_exp_8
97; PI3K-Akt-signaling-pathway	PI3K_Akt_signaling_pathway	MCL1	Cell survival	4.39379e-51	0.69628	1	1	3.1152e-48	seurat_exp_8
57; HIF-1-signaling-pathway	HIF_1_signaling_pathway	TIMP1	Increase oxygen delivery; Angiogenesis	9.72682e-48	1.21196	1	1	6.89632e-45	seurat_exp_8
63; HIF-1-signaling-pathway	HIF_1_signaling_pathway	TIMP1	Matrix and barrier functions	9.72682e-48	1.21196	1	1	6.89632e-45	seurat_exp_8
118; cAMP-signaling-pathway	cAMP_signaling_pathway	MYL9	Relaxation (endothelial cell, smooth muscle cell)	1.12377e-47	1.24993	1	1	7.96753e-45	seurat_exp_8
12; Hippo-signaling-pathway	Hippo_signaling_pathway	CTGF	Anti-apoptotic genes; Pro-proliferation genes	8.74234e-45	1.31791	1	1	6.19832e-42	seurat_exp_8
24; JAK-STAT-signaling-pathway	JAK_STAT_signaling_pathway	MCL1	Anti-apoptosis	3.94164e-43	0.5361	1	1	2.79462e-40	seurat_exp_8
12; Insulin-signaling-pathway	Insulin_signaling_pathway	FASN	Lipogenesis; Lipid homeostasis	4.72572e-43	-0.616339	1	1	3.35053e-40	seurat_exp_8
20; Cell-cycle	Cell_cycle	MCM2	DNA; DNA biosynthesis	1.1447e-41	-2.62725	1	1	8.11589e-39	seurat_exp_8
14; MAPK-signaling-pathway	MAPK_signaling_pathway	MAPT		1.72439e-39	-0.502679	1	1	1.22259e-36	seurat_exp_8
34; TGF-beta-signaling-pathway	TGF_beta_signaling_pathway	ROCK1		1.29079e-37	1.00909	1	1	9.15173e-35	seurat_exp_8
63; Complement-and-coagulation-cascades	Complement_and_coagulation_cascades	ITGAX	Phagocytosis	2.79394e-36	1.82821	1	1	1.98091e-33	seurat_exp_8
62; Complement-and-coagulation-cascades	Complement_and_coagulation_cascades	ITGAM	Phagocytosis	4.07017e-36	1.61654	1	1	2.88575e-33	seurat_exp_8
66; Complement-and-coagulation-cascades	Complement_and_coagulation_cascades	C3AR1	Degranulation, chemotaxis	4.19507e-35	1.80965	1	1	2.97431e-32	seurat_exp_8
54; AMPK-signaling-pathway	AMPK_signaling_pathway	SLC2A4	Activated mitochondrial biogeneses	6.23717e-34	-0.891307	1	1	4.42216e-31	seurat_exp_8
32; TGF-beta-signaling-pathway	TGF_beta_signaling_pathway	RPS6KB1		7.92405e-33	0.690293	1	1	5.61815e-30	seurat_exp_8
50; C-type-lectin-receptor-signaling-pathway	C_type_lectin_receptor_signaling_pathway	IL17D	Tfh cell differentiation	5.39661e-32	1.20056	1	1	3.82619e-29	seurat_exp_8
64; Complement-and-coagulation-cascades	Complement_and_coagulation_cascades	VSIG4	Phagocytosis	2.54132e-29	1.88452	1	1	1.80179e-26	seurat_exp_8
65; ErbB-signaling-pathway	ErbB_signaling_pathway	MYC	DNA; Adhesion	3.54527e-29	-0.979487	1	1	2.5136e-26	seurat_exp_8
71; Complement-and-coagulation-cascades	Complement_and_coagulation_cascades	CR1	Phagocytosis	5.29118e-29	1.17665	1	1	3.75145e-26	seurat_exp_8
61; Complement-and-coagulation-cascades	Complement_and_coagulation_cascades	CR2		5.95042e-29	1.11613	1	1	4.21885e-26	seurat_exp_8
65; Complement-and-coagulation-cascades	Complement_and_coagulation_cascades	C5AR1	Degranulation, chemotaxis	7.85714e-29	1.66929	1	1	5.57072e-26	seurat_exp_8
25; ErbB-signaling-pathway	ErbB_signaling_pathway	CDKN1B	Cell cycle progression	1.33224e-28	0.67853	1	1	9.44561e-26	seurat_exp_8
7; ErbB-signaling-pathway	ErbB_signaling_pathway	ERBB3	No signaling	1.96504e-28	-0.562894	1	1	1.39321e-25	seurat_exp_8
77; Toll-like-receptor-signaling-pathway	Toll_like_receptor_signaling_pathway	CXCL9	Chemptactic effects ( T cell )	4.53937e-27	1.9553	1	1	3.21841e-24	seurat_exp_8
24; B-cell-receptor-signaling-pathway	B_cell_receptor_signaling_pathway	FOS	DNA; B cell ontogeny; Autoimmunity; Anergy; Immuno response Ig production GC formation	2.08258e-26	0.599947	1	1	1.47655e-23	seurat_exp_8
21; Toll-like-receptor-signaling-pathway	Toll_like_receptor_signaling_pathway	IFNA1	Antiviral effects	2.55183e-24	1.37773	1	1	1.80925e-21	seurat_exp_8
44; Fc-gamma-R-mediated-phagocytosis	Fc_gamma_R_mediated_phagocytosis	GSN	Phagocytosis; Membrane traficking; Particle internalization; Phagosome closure; Phagosome-lysosome fusion	5.23018e-24	1.10135	1	1	3.7082e-21	seurat_exp_8
27; Fc-gamma-R-mediated-phagocytosis	Fc_gamma_R_mediated_phagocytosis	ARPC5	Phagocytosis; Membrane traficking; Particle internalization; Phagosome closure; Phagosome-lysosome fusion	6.31199e-24	1.41382	1	1	4.4752e-21	seurat_exp_8
18; Toll-like-receptor-signaling-pathway	Toll_like_receptor_signaling_pathway	CXCL11	Chemptactic effects ( T cell )	1.2845e-23	2.34758	1	1	9.10707e-21	seurat_exp_8
86; cGMP-PKG-signaling-pathway	cGMP_PKG_signaling_pathway	ATP2A1	Increased calcium sequestration	1.90142e-23	1.2753	1	1	1.3481e-20	seurat_exp_8
25; PI3K-Akt-signaling-pathway	PI3K_Akt_signaling_pathway	CDKN1B	Cell cycle progression	4.37299e-23	0.52726	1	1	3.10045e-20	seurat_exp_8
98; PI3K-Akt-signaling-pathway	PI3K_Akt_signaling_pathway	BCL2L1	Cell survival	5.43516e-22	0.615346	1	1	3.85353e-19	seurat_exp_8
17; Rap1-signaling-pathway	Rap1_signaling_pathway	ACTB	Cell adhesion,migration,polarity	5.85638e-22	1.56587	1	1	4.15217e-19	seurat_exp_8
30; Rap1-signaling-pathway	Rap1_signaling_pathway	ITGAL	Cell adhesion,migration,polarity	6.31412e-22	1.28906	1	1	4.47671e-19	seurat_exp_8
16; mTOR-signaling-pathway	mTOR_signaling_pathway	LPIN1	Lipid biosynthesis	9.49687e-22	-0.546851	1	1	6.73328e-19	seurat_exp_8
39; HIF-1-signaling-pathway	HIF_1_signaling_pathway	C00002	ATP	2.59657e-21	-0.777617	1	1	1.84097e-18	seurat_exp_8
38; Fc-gamma-R-mediated-phagocytosis	Fc_gamma_R_mediated_phagocytosis	CFL1	Phagocytosis; Membrane traficking; Particle internalization; Phagosome closure; Phagosome-lysosome fusion	6.9492e-21	-0.5055	1	1	4.92699e-18	seurat_exp_8
52; MAPK-signaling-pathway	MAPK_signaling_pathway	MEF2C	DNA; Proliferation differentiation, inflammation	6.95929e-21	0.682093	1	1	4.93414e-18	seurat_exp_8
55; NF-kappa-B-signaling-pathway	NF_kappa_B_signaling_pathway	CXCL12	Myeloiesis and B-cell lymphopoieses	1.38915e-20	0.84841	1	1	9.84905e-18	seurat_exp_8
20; Toll-like-receptor-signaling-pathway	Toll_like_receptor_signaling_pathway	IFNB1	Antiviral effects	3.75385e-20	1.27819	1	1	2.66148e-17	seurat_exp_8
7; Apoptosis	Apoptosis	ENDOG	DNA fragmentation; Apoptosis	7.2246e-20	-0.755241	1	1	5.12224e-17	seurat_exp_8
61; HIF-1-signaling-pathway	HIF_1_signaling_pathway	HMOX1	Increase oxygen delivery; Vascular tone	1.1861e-19	1.88086	1	1	8.40944e-17	seurat_exp_8
82; Rap1-signaling-pathway	Rap1_signaling_pathway	ITGA2B	Cell adhesion,migration,polarity	8.39128e-19	1.41303	1	1	5.94942e-16	seurat_exp_8
19; Toll-like-receptor-signaling-pathway	Toll_like_receptor_signaling_pathway	CXCL10	Chemptactic effects ( T cell )	1.45199e-18	2.23331	1	1	1.02946e-15	seurat_exp_8
42; PPAR-signaling-pathway	PPAR_signaling_pathway	CD36	Fatty acid transport; Lipid metabolism	4.54466e-18	-1.05003	1	1	3.22216e-15	seurat_exp_8
40; Toll-like-receptor-signaling-pathway	Toll_like_receptor_signaling_pathway	CCL5	Chemotactic effects ( Nutrophil, Immature DC )( NK cell )	5.99361e-18	1.32285	1	1	4.24947e-15	seurat_exp_8
39; Toll-like-receptor-signaling-pathway	Toll_like_receptor_signaling_pathway	IL6	Inflammatory cytokines;Proinflammatory effects	1.72869e-17	0.790132	1	1	1.22564e-14	seurat_exp_8
27; B-cell-receptor-signaling-pathway	B_cell_receptor_signaling_pathway	NFATC1	DNA; B cell ontogeny; Autoimmunity; Anergy; Immuno response Ig production GC formation	2.33168e-17	0.799638	1	1	1.65316e-14	seurat_exp_8
54; HIF-1-signaling-pathway	HIF_1_signaling_pathway	SERPINE1	Increase oxygen delivery; Angiogenesis	5.07725e-17	0.707876	1	1	3.59977e-14	seurat_exp_8
86; IL-17-signaling-pathway	IL_17_signaling_pathway	IL1B	Inflammantory genes; Antibacterial peptides Th17 cytokines; Inflammention; Host defence; Autoimmune	7.07739e-17	-0.599692	1	1	5.01787e-14	seurat_exp_8
55; HIF-1-signaling-pathway	HIF_1_signaling_pathway	ANGPT1	Increase oxygen delivery; Angiogenesis	2.62108e-16	0.570422	1	1	1.85835e-13	seurat_exp_8
84; Apoptosis	Apoptosis	FAS	Pro-apoptotic genes	1.11938e-15	0.84167	1	1	7.93643e-13	seurat_exp_8
59; Ras-signaling-pathway	Ras_signaling_pathway	STK4	Apoptosis; Cell-cycle arrest	3.71675e-14	0.690473	1	1	2.63518e-11	seurat_exp_8
132; NF-kappa-B-signaling-pathway	NF_kappa_B_signaling_pathway	VCAM1	Inflammation	3.7485e-14	1.28692	1	1	2.65768e-11	seurat_exp_8
88; Hippo-signaling-pathway	Hippo_signaling_pathway	ID1	Anti-apoptotic genes; Pro-proliferation genes	3.56755e-13	0.502966	1	1	2.52939e-10	seurat_exp_8
83; Apoptosis	Apoptosis	TP53	Pro-apoptotic genes	6.67062e-13	0.561695	1	1	4.72947e-10	seurat_exp_8
75; Chemokine-signaling-pathway	Chemokine_signaling_pathway	WAS		1.72584e-12	0.715107	1	1	1.22362e-09	seurat_exp_8
166; TNF-signaling-pathway	TNF_signaling_pathway	IFNB1		2.38647e-12	0.507559	1	1	1.69201e-09	seurat_exp_8
11; Fc-epsilon-RI-signaling-pathway	Fc_epsilon_RI_signaling_pathway	C00374	Degranulation; Heparin; Toxic to parasites; Increase vascular permeabilityl Cause smiith muscle contraction	2.50356e-12	0.764185	1	1	1.77502e-09	seurat_exp_8
12; Fc-epsilon-RI-signaling-pathway	Fc_epsilon_RI_signaling_pathway	C00388	Degranulation; Histamine; Toxic to parasites; Increase vascular permeabilityl Cause smiith muscle contraction	2.50356e-12	0.764185	1	1	1.77502e-09	seurat_exp_8
86; Toll-like-receptor-signaling-pathway	Toll_like_receptor_signaling_pathway	IL12A	Inflammatory cytokines;Proinflammatory effects	2.90255e-12	0.550895	1	1	2.05791e-09	seurat_exp_8
85; Apoptosis	Apoptosis	FASLG	Pro-apoptotic genes	3.90477e-12	0.969584	1	1	2.76848e-09	seurat_exp_8
101; cGMP-PKG-signaling-pathway	cGMP_PKG_signaling_pathway	CREB3	Increased expression of anti-apoptotic proteins; Decreased activity of caspase -3;Inhibition of apoptosos	6.98699e-12	0.522295	1	1	4.95378e-09	seurat_exp_8
59; Hippo-signaling-pathway	Hippo_signaling_pathway	SERPINE1	Anti-apoptotic genes; Pro-proliferation genes	1.46674e-11	0.54635	1	1	1.03992e-08	seurat_exp_8
43; T-cell-receptor-signaling-pathway	T_cell_receptor_signaling_pathway	RHOA		3.33243e-11	0.563524	1	1	2.36269e-08	seurat_exp_8
103; cGMP-PKG-signaling-pathway	cGMP_PKG_signaling_pathway	VASP	Cell growth and differentiantion; Platelet inhibition	3.48398e-11	0.678717	1	1	2.47014e-08	seurat_exp_8
105; cGMP-PKG-signaling-pathway	cGMP_PKG_signaling_pathway	SLC8A2		3.59054e-11	0.697487	1	1	2.54569e-08	seurat_exp_8
51; Fc-gamma-R-mediated-phagocytosis	Fc_gamma_R_mediated_phagocytosis	NCF1	NADPH oxidase; Digestion of bacterium; Respiratory burst in phagosome	5.79568e-11	0.746085	1	1	4.10914e-08	seurat_exp_8
54; Chemokine-signaling-pathway	Chemokine_signaling_pathway	ROCK1		9.79045e-11	0.63125	1	1	6.94143e-08	seurat_exp_8
96; Rap1-signaling-pathway	Rap1_signaling_pathway	PLCE1	Proliferation survival gene activation	1.81417e-10	0.723522	1	1	1.28625e-07	seurat_exp_8
87; Toll-like-receptor-signaling-pathway	Toll_like_receptor_signaling_pathway	CCL4L1	Chemotactic effects ( Nutrophil, Immature DC )( NK cell )	2.068e-10	0.549374	1	1	1.46621e-07	seurat_exp_8
2; NF-kappa-B-signaling-pathway	NF_kappa_B_signaling_pathway	BCL2L1	Survival	2.62119e-10	0.701962	1	1	1.85842e-07	seurat_exp_8
89; C-type-lectin-receptor-signaling-pathway	C_type_lectin_receptor_signaling_pathway	IL2	Th1 Th17 cell differentiation	3.94009e-10	0.586299	1	1	2.79352e-07	seurat_exp_8
46; Toll-like-receptor-signaling-pathway	Toll_like_receptor_signaling_pathway	TNF	Inflammatory cytokines;Proinflammatory effects	6.4764e-10	0.653054	1	1	4.59176e-07	seurat_exp_8
157; C-type-lectin-receptor-signaling-pathway	C_type_lectin_receptor_signaling_pathway	IL10	Th1 Th17 cell differentiation	7.74674e-10	0.593942	1	1	5.49244e-07	seurat_exp_8
49; Fc-gamma-R-mediated-phagocytosis	Fc_gamma_R_mediated_phagocytosis	ARF6	Phagocytosis; Membrane traficking; Particle internalization; Phagosome closure; Phagosome-lysosome fusion	9.39211e-10	0.923031	1	1	6.659e-07	seurat_exp_8
3; ErbB-signaling-pathway	ErbB_signaling_pathway	ELK1	DNA; Migration/ Invasion	1.39423e-09	-0.642429	1	1	9.88508e-07	seurat_exp_8
74; PPAR-signaling-pathway	PPAR_signaling_pathway	DBI	Fatty acid transport; Lipid metabolism	1.55764e-09	-0.682717	1	1	1.10437e-06	seurat_exp_8
85; Cell-cycle	Cell_cycle	RAD21		2.81224e-09	-0.667543	1	1	1.99388e-06	seurat_exp_8
76; Toll-like-receptor-signaling-pathway	Toll_like_receptor_signaling_pathway	CCL3L3	Chemotactic effects ( Nutrophil, Immature DC )( NK cell )	3.851e-09	0.587072	1	1	2.73036e-06	seurat_exp_8
100; cGMP-PKG-signaling-pathway	cGMP_PKG_signaling_pathway	BAD	Decreasedrelease of cytochrom C; Decreased activity of caspase -3;Inhibition of apoptosos	2.0806e-08	0.552507	1	1	1.47514e-05	seurat_exp_8
14; Rap1-signaling-pathway	Rap1_signaling_pathway	MAPK14	Proliferation survival gene activation	3.57103e-08	0.576242	1	1	2.53186e-05	seurat_exp_8
56; ErbB-signaling-pathway	ErbB_signaling_pathway	JUN	DNA; Angiogenesis	3.67957e-08	-1.14542	1	1	2.60881e-05	seurat_exp_8
23; ErbB-signaling-pathway	ErbB_signaling_pathway	RPS6KB1	Protein synthesis	3.99564e-08	-0.553383	1	1	2.83291e-05	seurat_exp_8
175; NOD-like-receptor-signaling-pathway	NOD_like_receptor_signaling_pathway	CCL5	Chemokines	4.09555e-08	0.56082	1	1	2.90375e-05	seurat_exp_8
31; Complement-and-coagulation-cascades	Complement_and_coagulation_cascades	C6...	Membrane attack complex; Cell lysis	4.73111e-08	0.846657	1	1	3.35435e-05	seurat_exp_8
67; Rap1-signaling-pathway	Rap1_signaling_pathway	AKT3	Proliferation survival gene activation	5.65999e-08	0.812697	1	1	4.01293e-05	seurat_exp_8
107; cGMP-PKG-signaling-pathway	cGMP_PKG_signaling_pathway	ATP2B1		6.84797e-08	0.504832	1	1	4.85521e-05	seurat_exp_8
6; Fc-epsilon-RI-signaling-pathway	Fc_epsilon_RI_signaling_pathway	C00696	Generation of eicosanoids	9.13263e-08	1.44558	1	1	6.47503e-05	seurat_exp_8
7; Fc-epsilon-RI-signaling-pathway	Fc_epsilon_RI_signaling_pathway	C05952	Generation of eicosanoids	9.13263e-08	1.44558	1	1	6.47503e-05	seurat_exp_8
8; Fc-epsilon-RI-signaling-pathway	Fc_epsilon_RI_signaling_pathway	C05951	Generation of eicosanoids	9.13263e-08	1.44558	1	1	6.47503e-05	seurat_exp_8
9; Fc-epsilon-RI-signaling-pathway	Fc_epsilon_RI_signaling_pathway	C02166	Generation of eicosanoids	9.13263e-08	1.44558	1	1	6.47503e-05	seurat_exp_8
37; C-type-lectin-receptor-signaling-pathway	C_type_lectin_receptor_signaling_pathway	IL6	Th1 Th17 cell differentiation	2.09488e-07	0.765249	1	1	0.000148527	seurat_exp_8
48; ErbB-signaling-pathway	ErbB_signaling_pathway	CAMK2A	Cellular targets	2.96433e-07	-0.750783	1	1	0.000210171	seurat_exp_8
33; Cytosolic-DNA-sensing-pathway	Cytosolic_DNA_sensing_pathway	CCL5	Pro-inflammatory cytokines and chemokines	8.50603e-07	1.20985	1	1	0.000603078	seurat_exp_8
66; Toll-like-receptor-signaling-pathway	Toll_like_receptor_signaling_pathway	CASP8		1.53037e-06	0.538557	1	1	0.00108503	seurat_exp_8
47; ErbB-signaling-pathway	ErbB_signaling_pathway	PRKCA	Cellular targets	3.38214e-06	-0.713037	1	1	0.00239794	seurat_exp_8
12; Toll-like-receptor-signaling-pathway	Toll_like_receptor_signaling_pathway	NFKB1	Degradation	4.621e-06	0.817407	1	1	0.00327629	seurat_exp_8
6; B-cell-receptor-signaling-pathway	B_cell_receptor_signaling_pathway	NFKB1	DNA; B cell ontogeny; Autoimmunity; Anergy; Immuno response Ig production GC formation	1.03611e-05	1.22561	1	1	0.00734599	seurat_exp_8
121; Chemokine-signaling-pathway	Chemokine_signaling_pathway	NFKB1	DNA; Cytokine production; Cellular gowth and differentiation; Cell survival; Migration; Apoptosis	1.73666e-05	0.63529	1	1	0.0123129	seurat_exp_8
29; Toll-like-receptor-signaling-pathway	Toll_like_receptor_signaling_pathway	CXCL8	Chemotactic effects ( Nutrophil, Immature DC )( NK cell )	2.67357e-05	-0.543859	1	1	0.0189556	seurat_exp_8
50; RIG-I-like-receptor-signaling-pathway	RIG_I_like_receptor_signaling_pathway	IFNK	Type 1 interfeons; Protein synthesis; Growth arrest; Dendrition cell activation; NK cell activation; Antibody production; Apoptosis	5.67804e-05	1.60259	1	1	0.0402573	seurat_exp_8
47; ErbB-signaling-pathway	ErbB_signaling_pathway	PRKCA	Cellular targets	6.68331e-92	2.62305	1	1	4.73847e-89	seurat_exp_9
48; ErbB-signaling-pathway	ErbB_signaling_pathway	CAMK2A	Cellular targets	2.7668e-90	2.59192	1	1	1.96166e-87	seurat_exp_9
31; Wnt-signaling-pathway	Wnt_signaling_pathway	MMP7		5.12618e-84	1.95315	1	1	3.63446e-81	seurat_exp_9
35; ErbB-signaling-pathway	ErbB_signaling_pathway	CBL	Receptor ubiquitylation;Degradation	6.13346e-81	2.2037	1	1	4.34862e-78	seurat_exp_9
76; Endocrine-resistance	Endocrine_resistance	NOTCH1	Migration Invasion	1.14264e-78	1.00901	1	1	8.10129e-76	seurat_exp_9
114; cAMP-signaling-pathway	cAMP_signaling_pathway	HHIP	Downregulation of Hedgehog signaling (embryonic fibroblast)	6.60544e-78	1.08242	1	1	4.68326e-75	seurat_exp_9
112; cAMP-signaling-pathway	cAMP_signaling_pathway	GLI1	Downregulation of Hedgehog signaling (embryonic fibroblast)	1.78773e-76	1.0929	1	1	1.2675e-73	seurat_exp_9
50; FoxO-signaling-pathway	FoxO_signaling_pathway	TNFSF10	Apoptosis	6.81699e-75	1.02015	1	1	4.83324e-72	seurat_exp_9
57; ErbB-signaling-pathway	ErbB_signaling_pathway	ABL1		1.34885e-74	2.29577	1	1	9.56332e-72	seurat_exp_9
56; ErbB-signaling-pathway	ErbB_signaling_pathway	JUN	DNA; Angiogenesis	3.43429e-72	2.32151	1	1	2.43491e-69	seurat_exp_9
29; ErbB-signaling-pathway	ErbB_signaling_pathway	STAT5A	DNA; Survival	6.19886e-72	2.08376	1	1	4.39499e-69	seurat_exp_9
43; ErbB-signaling-pathway	ErbB_signaling_pathway	PTK2	Adhesion Migration	1.24226e-68	2.03011	1	1	8.8076e-66	seurat_exp_9
40; ErbB-signaling-pathway	ErbB_signaling_pathway	ELK1	DNA; Angiogenesis	2.96594e-68	2.75457	1	1	2.10285e-65	seurat_exp_9
71; PPAR-signaling-pathway	PPAR_signaling_pathway	CYP27A1	Cholesterol metabolism; Lipid metabilism	1.50343e-65	-0.586877	1	1	1.06593e-62	seurat_exp_9
14; MAPK-signaling-pathway	MAPK_signaling_pathway	MAPT		1.54375e-60	-0.672816	1	1	1.09452e-57	seurat_exp_9
51; Hedgehog-signaling-pathway	Hedgehog_signaling_pathway	CCND1	Activiation of Hh target genes; Cell prolifeation tissue patterning stem cell maintenance,	2.39001e-60	0.932196	1	1	1.69452e-57	seurat_exp_9
31; Hedgehog-signaling-pathway	Hedgehog_signaling_pathway	GLI1	Respression of Hh target genes; Cell prolifeation tissue patterning stem cell maintenance, development, ect	3.57055e-59	1.37892	1	1	2.53152e-56	seurat_exp_9
24; JAK-STAT-signaling-pathway	JAK_STAT_signaling_pathway	MCL1	Anti-apoptosis	1.28195e-57	0.829897	1	1	9.08899e-55	seurat_exp_9
113; cAMP-signaling-pathway	cAMP_signaling_pathway	PTCH1	Downregulation of Hedgehog signaling (embryonic fibroblast)	2.81963e-54	0.765923	1	1	1.99912e-51	seurat_exp_9
27; p53-signaling-pathway	p53_signaling_pathway	THBS1	Inflammhibition of angiogenesis and metastasis	1.4157e-53	0.877595	1	1	1.00373e-50	seurat_exp_9
66; PPAR-signaling-pathway	PPAR_signaling_pathway	SCD	Lipogenesis;; Lipid metabolism	1.80471e-52	-0.547365	1	1	1.27954e-49	seurat_exp_9
20; Cell-cycle	Cell_cycle	MCM2	DNA; DNA biosynthesis	2.13693e-52	-3.02732	1	1	1.51509e-49	seurat_exp_9
42; Fc-gamma-R-mediated-phagocytosis	Fc_gamma_R_mediated_phagocytosis	MYO10	Phagocytosis; Membrane remodeling; Focal exocytosis; Pseudopod extention; Particle internalization	8.4769e-51	-0.70414	1	1	6.01012e-48	seurat_exp_9
108; cAMP-signaling-pathway	cAMP_signaling_pathway	AMH	Increased testticular AMH output (prepuberfal sertoli cell)	9.07477e-50	0.685008	1	1	6.43401e-47	seurat_exp_9
33; Hedgehog-signaling-pathway	Hedgehog_signaling_pathway	HHIP	Respression of Hh target genes; Cell prolifeation tissue patterning stem cell maintenance, development, ect	2.50717e-49	0.8356	1	1	1.77758e-46	seurat_exp_9
116; EGFR-tyrosine-kinase-inhibitor-resistance	EGFR_tyrosine_kinase_inhibitor_resistance	STAT3	Abnormal dimerization of STAT 3; DNA; Differentiation; Growth; Proliferation; Survival; Motility; Angiogenesis	5.72739e-49	1.24599	1	1	4.06072e-46	seurat_exp_9
3; ErbB-signaling-pathway	ErbB_signaling_pathway	ELK1	DNA; Migration/ Invasion	3.42864e-48	2.41416	1	1	2.43091e-45	seurat_exp_9
50; C-type-lectin-receptor-signaling-pathway	C_type_lectin_receptor_signaling_pathway	IL17D	Tfh cell differentiation	6.8526e-47	0.938859	1	1	4.8585e-44	seurat_exp_9
25; PI3K-Akt-signaling-pathway	PI3K_Akt_signaling_pathway	CDKN1B	Cell cycle progression	2.9183e-46	0.939753	1	1	2.06907e-43	seurat_exp_9
121; MAPK-signaling-pathway	MAPK_signaling_pathway	MYC		3.02515e-45	-0.538369	1	1	2.14483e-42	seurat_exp_9
13; Hedgehog-signaling-pathway	Hedgehog_signaling_pathway	GLI1	Activiation of Hh target genes; Cell prolifeation tissue patterning stem cell maintenance,	2.50573e-44	0.521457	1	1	1.77656e-41	seurat_exp_9
22; ErbB-signaling-pathway	ErbB_signaling_pathway	EIF4EBP1	Protein synthesis	2.74452e-44	-0.634204	1	1	1.94587e-41	seurat_exp_9
164; cGMP-PKG-signaling-pathway	cGMP_PKG_signaling_pathway	PPIF	Cardioprotection	4.38383e-44	1.3086	1	1	3.10814e-41	seurat_exp_9
38; IL-17-signaling-pathway	IL_17_signaling_pathway	CEBPB		1.02961e-43	0.707988	1	1	7.29996e-41	seurat_exp_9
44; FoxO-signaling-pathway	FoxO_signaling_pathway	CDKN1B	Cell cycle regulation	5.88943e-43	0.605063	1	1	4.1756e-40	seurat_exp_9
21; ErbB-signaling-pathway	ErbB_signaling_pathway	GSK3B	Metabolism	8.7114e-42	-0.519855	1	1	6.17638e-39	seurat_exp_9
7; ErbB-signaling-pathway	ErbB_signaling_pathway	ERBB3	No signaling	1.77215e-41	-0.698571	1	1	1.25645e-38	seurat_exp_9
12; Insulin-signaling-pathway	Insulin_signaling_pathway	FASN	Lipogenesis; Lipid homeostasis	3.79838e-41	-0.644429	1	1	2.69305e-38	seurat_exp_9
95; Rap1-signaling-pathway	Rap1_signaling_pathway	THBS1	Defective angiogensis	7.06332e-39	1.03636	1	1	5.00789e-36	seurat_exp_9
70; PPAR-signaling-pathway	PPAR_signaling_pathway	NR1H3	Cholesterol metabolism; Lipid metabilism	8.12899e-39	-0.541484	1	1	5.76345e-36	seurat_exp_9
32; Hedgehog-signaling-pathway	Hedgehog_signaling_pathway	PTCH1	Respression of Hh target genes; Cell prolifeation tissue patterning stem cell maintenance, development, ect	1.07772e-35	0.660948	1	1	7.64106e-33	seurat_exp_9
67; PPAR-signaling-pathway	PPAR_signaling_pathway	FADS2	Lipogenesis;; Lipid metabolism	1.3126e-35	-0.585806	1	1	9.30633e-33	seurat_exp_9
95; Endocrine-resistance	Endocrine_resistance	E2F1	Cell cycle progression	1.78645e-35	-0.728307	1	1	1.26659e-32	seurat_exp_9
53; mTOR-signaling-pathway	mTOR_signaling_pathway	GRB10	Lipolysis	2.15176e-35	-0.616844	1	1	1.5256e-32	seurat_exp_9
48; PPAR-signaling-pathway	PPAR_signaling_pathway	HMGCS1	Ketogenesis; Lipid metabolism	2.66525e-34	-0.543643	1	1	1.88966e-31	seurat_exp_9
57; p53-signaling-pathway	p53_signaling_pathway	CCNB1	G2 arrest( sustaines); Cell cycle arrest	3.24532e-34	-0.577804	1	1	2.30093e-31	seurat_exp_9
43; PPAR-signaling-pathway	PPAR_signaling_pathway	FABP3	Fatty acid transport; Lipid metabolism	5.98231e-34	-0.541396	1	1	4.24146e-31	seurat_exp_9
47; PPAR-signaling-pathway	PPAR_signaling_pathway	SLC27A4	Fatty acid transport; Lipid metabolism	1.20947e-33	-0.541253	1	1	8.57512e-31	seurat_exp_9
31; JAK-STAT-signaling-pathway	JAK_STAT_signaling_pathway	BCL2L1	Anti-apoptosis	4.25272e-33	0.526159	1	1	3.01518e-30	seurat_exp_9
89; HIF-1-signaling-pathway	HIF_1_signaling_pathway	CDKN1A	Reduce oxygen consumption; Regulate proliferation and apoptosis	8.00218e-31	0.782055	1	1	5.67355e-28	seurat_exp_9
119; Apoptosis	Apoptosis	BCL2	Pro-survival genes	1.89257e-30	-0.515432	1	1	1.34183e-27	seurat_exp_9
37; PPAR-signaling-pathway	PPAR_signaling_pathway	CPT2	Fatty acid oxidation; Lipit metabolism	3.76505e-30	-0.529562	1	1	2.66942e-27	seurat_exp_9
15; AMPK-signaling-pathway	AMPK_signaling_pathway	FOXO1	Activated mitochondrial biogeneses	1.14536e-29	0.812784	1	1	8.12059e-27	seurat_exp_9
46; Cell-cycle	Cell_cycle	RB1		1.3224e-29	-0.512131	1	1	9.37584e-27	seurat_exp_9
16; mTOR-signaling-pathway	mTOR_signaling_pathway	LPIN1	Lipid biosynthesis	1.34722e-29	-0.570499	1	1	9.5518e-27	seurat_exp_9
32; mTOR-signaling-pathway	mTOR_signaling_pathway	ULK1	Autophagy	1.63038e-29	0.775084	1	1	1.15594e-26	seurat_exp_9
62; mTOR-signaling-pathway	mTOR_signaling_pathway	TTI1		1.66815e-28	-0.555441	1	1	1.18272e-25	seurat_exp_9
28; PI3K-Akt-signaling-pathway	PI3K_Akt_signaling_pathway	BCL2L11	Cell survival	1.94422e-28	0.664666	1	1	1.37845e-25	seurat_exp_9
7; Apoptosis	Apoptosis	ENDOG	DNA fragmentation; Apoptosis	1.02503e-27	-0.858808	1	1	7.26743e-25	seurat_exp_9
38; Fc-gamma-R-mediated-phagocytosis	Fc_gamma_R_mediated_phagocytosis	CFL1	Phagocytosis; Membrane traficking; Particle internalization; Phagosome closure; Phagosome-lysosome fusion	1.12e-27	-0.764273	1	1	7.94077e-25	seurat_exp_9
21; TGF-beta-signaling-pathway	TGF_beta_signaling_pathway	CDKN2B	G1 arrest	2.48725e-27	0.68214	1	1	1.76346e-24	seurat_exp_9
60; Hippo-signaling-pathway	Hippo_signaling_pathway	CTGF	Anti-apoptotic genes; Pro-proliferation genes	4.66054e-27	0.845687	1	1	3.30432e-24	seurat_exp_9
23; ErbB-signaling-pathway	ErbB_signaling_pathway	RPS6KB1	Protein synthesis	2.53245e-25	1.58195	1	1	1.79551e-22	seurat_exp_9
11; HIF-1-signaling-pathway	HIF_1_signaling_pathway	SLC2A1	Reduce oxygen consumption; Promote anaerobic metabolism	1.02814e-24	0.678886	1	1	7.2895e-22	seurat_exp_9
55; HIF-1-signaling-pathway	HIF_1_signaling_pathway	ANGPT1	Increase oxygen delivery; Angiogenesis	2.13187e-24	0.663034	1	1	1.5115e-21	seurat_exp_9
74; PPAR-signaling-pathway	PPAR_signaling_pathway	DBI	Fatty acid transport; Lipid metabolism	1.50079e-23	-0.822844	1	1	1.06406e-20	seurat_exp_9
94; cGMP-PKG-signaling-pathway	cGMP_PKG_signaling_pathway	MAPK1	Platelet activation	9.01694e-23	-0.500943	1	1	6.39301e-20	seurat_exp_9
13; Hippo-signaling-pathway	Hippo_signaling_pathway	BIRC5	Anti-apoptotic genes; Pro-proliferation genes	1.61747e-22	-0.57956	1	1	1.14679e-19	seurat_exp_9
57; HIF-1-signaling-pathway	HIF_1_signaling_pathway	TIMP1	Increase oxygen delivery; Angiogenesis	8.88403e-22	0.502234	1	1	6.29878e-19	seurat_exp_9
63; HIF-1-signaling-pathway	HIF_1_signaling_pathway	TIMP1	Matrix and barrier functions	8.88403e-22	0.502234	1	1	6.29878e-19	seurat_exp_9
52; PPAR-signaling-pathway	PPAR_signaling_pathway	ANGPTL4	Adipocyte differentiation	1.98503e-20	-0.548351	1	1	1.40739e-17	seurat_exp_9
11; Cytosolic-DNA-sensing-pathway	Cytosolic_DNA_sensing_pathway	IFNB1	Type I interfeons; Cell death; NK cell activation; Anti-viral protection; anti-bacterial response	5.71602e-20	0.519061	1	1	4.05266e-17	seurat_exp_9
86; Apoptosis	Apoptosis	BCL2L11	Pro-apoptotic genes	2.17216e-19	0.876807	1	1	1.54006e-16	seurat_exp_9
13; Cytosolic-DNA-sensing-pathway	Cytosolic_DNA_sensing_pathway	IFNA1	Type I interfeons; Cell death; NK cell activation; Anti-viral protection; anti-bacterial response	4.77353e-19	0.52101	1	1	3.38443e-16	seurat_exp_9
132; EGFR-tyrosine-kinase-inhibitor-resistance	EGFR_tyrosine_kinase_inhibitor_resistance	EIF4E	Protein synthesis; Differentiation; Growth; Proliferation; Survival; Motility; Angiogenesis	2.24624e-17	0.827925	1	1	1.59258e-14	seurat_exp_9
46; Insulin-signaling-pathway	Insulin_signaling_pathway	FBP1	Glycolysis;Glucose homeostasis; Glycogenesis	2.60031e-16	0.625791	1	1	1.84362e-13	seurat_exp_9
12; Hippo-signaling-pathway	Hippo_signaling_pathway	CTGF	Anti-apoptotic genes; Pro-proliferation genes	2.61645e-16	0.564989	1	1	1.85506e-13	seurat_exp_9
17; p53-signaling-pathway	p53_signaling_pathway	TP73	p53 negative feedback	2.74981e-16	0.620192	1	1	1.94961e-13	seurat_exp_9
153; TNF-signaling-pathway	TNF_signaling_pathway	MAPK14	Cell survival	3.09501e-16	-0.656013	1	1	2.19436e-13	seurat_exp_9
42; PPAR-signaling-pathway	PPAR_signaling_pathway	CD36	Fatty acid transport; Lipid metabolism	4.34624e-16	-1.03882	1	1	3.08149e-13	seurat_exp_9
79; Hippo-signaling-pathway	Hippo_signaling_pathway	SNAI2	Anti-apoptotic genes; Pro-proliferation genes	1.23515e-15	0.852333	1	1	8.75723e-13	seurat_exp_9
29; B-cell-receptor-signaling-pathway	B_cell_receptor_signaling_pathway	RAC1		1.91947e-15	0.532269	1	1	1.36091e-12	seurat_exp_9
37; VEGF-signaling-pathway	VEGF_signaling_pathway	CASP9	Survival	3.11232e-15	0.592013	1	1	2.20663e-12	seurat_exp_9
86; IL-17-signaling-pathway	IL_17_signaling_pathway	IL1B	Inflammantory genes; Antibacterial peptides Th17 cytokines; Inflammention; Host defence; Autoimmune	3.08921e-13	-0.557328	1	1	2.19025e-10	seurat_exp_9
39; HIF-1-signaling-pathway	HIF_1_signaling_pathway	C00002	ATP	1.12906e-12	-0.738089	1	1	8.00501e-10	seurat_exp_9
58; Hippo-signaling-pathway	Hippo_signaling_pathway	SMAD7	Anti-apoptotic genes; Pro-proliferation genes	1.39982e-11	0.638546	1	1	9.92474e-09	seurat_exp_9
65; ErbB-signaling-pathway	ErbB_signaling_pathway	MYC	DNA; Adhesion	5.72711e-11	1.3179	1	1	4.06052e-08	seurat_exp_9
27; B-cell-receptor-signaling-pathway	B_cell_receptor_signaling_pathway	NFATC1	DNA; B cell ontogeny; Autoimmunity; Anergy; Immuno response Ig production GC formation	7.12487e-10	0.650016	1	1	5.05153e-07	seurat_exp_9
69; Apoptosis	Apoptosis	PTPN13	Pro-survival genes	1.45179e-09	0.531135	1	1	1.02932e-06	seurat_exp_9
54; NF-kappa-B-signaling-pathway	NF_kappa_B_signaling_pathway	CCL13	Lymphoid-tissue homing	2.29666e-08	-1.66598	1	1	1.62833e-05	seurat_exp_9
62; Complement-and-coagulation-cascades	Complement_and_coagulation_cascades	ITGAM	Phagocytosis	3.06667e-08	-0.556905	1	1	2.17427e-05	seurat_exp_9
63; Complement-and-coagulation-cascades	Complement_and_coagulation_cascades	ITGAX	Phagocytosis	7.79111e-08	-0.631364	1	1	5.5239e-05	seurat_exp_9
88; Hippo-signaling-pathway	Hippo_signaling_pathway	ID1	Anti-apoptotic genes; Pro-proliferation genes	2.4531e-07	0.814974	1	1	0.000173925	seurat_exp_9
20; NOD-like-receptor-signaling-pathway	NOD_like_receptor_signaling_pathway	IL18		1.02756e-06	-0.601019	1	1	0.000728542	seurat_exp_9
137; NF-kappa-B-signaling-pathway	NF_kappa_B_signaling_pathway	ICAM1	Lymphocyte adhesion, T-cell costimulation	3.10583e-06	-2.71998	1	1	0.00220203	seurat_exp_9
135; NF-kappa-B-signaling-pathway	NF_kappa_B_signaling_pathway	CCL19	Lymphoid-tissue homing	5.29556e-06	-3.80204	1	1	0.00375455	seurat_exp_9
61; Complement-and-coagulation-cascades	Complement_and_coagulation_cascades	CR2		6.92234e-06	-0.555434	1	1	0.00490794	seurat_exp_9
132; NF-kappa-B-signaling-pathway	NF_kappa_B_signaling_pathway	VCAM1	Inflammation	7.37807e-06	-0.755112	1	1	0.00523105	seurat_exp_9
19; NOD-like-receptor-signaling-pathway	NOD_like_receptor_signaling_pathway	IL1B		1.06971e-05	-1.55263	1	1	0.00758424	seurat_exp_9
136; NF-kappa-B-signaling-pathway	NF_kappa_B_signaling_pathway	TNFSF13B	B-cell development; B-cell survival	2.81213e-05	-1.57845	1	1	0.019938	seurat_exp_9
134; NF-kappa-B-signaling-pathway	NF_kappa_B_signaling_pathway	CCL21	Lymphoid-tissue homing	2.95127e-05	-0.922118	1	1	0.0209245	seurat_exp_9
50; NF-kappa-B-signaling-pathway	NF_kappa_B_signaling_pathway	NFKBIA	Negative feedback	5.91214e-05	-1.36584	1	1	0.0419171	seurat_exp_9
66; Complement-and-coagulation-cascades	Complement_and_coagulation_cascades	C3AR1	Degranulation, chemotaxis	6.25409e-05	-0.519145	1	1	0.0443415	seurat_exp_9
181; NOD-like-receptor-signaling-pathway	NOD_like_receptor_signaling_pathway	IFNA1		2.393e-45	-0.715051	1	1	1.69664e-42	seurat_exp_10
54; AMPK-signaling-pathway	AMPK_signaling_pathway	SLC2A4	Activated mitochondrial biogeneses	1.30564e-34	0.766158	1	1	9.25697e-32	seurat_exp_10
7; ErbB-signaling-pathway	ErbB_signaling_pathway	ERBB3	No signaling	5.65574e-33	0.673741	1	1	4.00992e-30	seurat_exp_10
38; IL-17-signaling-pathway	IL_17_signaling_pathway	CEBPB		2.65108e-27	-0.690241	1	1	1.87962e-24	seurat_exp_10
110; cAMP-signaling-pathway	cAMP_signaling_pathway	FOS	Hyperexcitability cell death/survival(hippocampal neuron)	7.39879e-25	-0.984856	1	1	5.24574e-22	seurat_exp_10
38; TNF-signaling-pathway	TNF_signaling_pathway	CEBPB		1.05368e-23	-0.973851	1	1	7.47059e-21	seurat_exp_10
69; MAPK-signaling-pathway	MAPK_signaling_pathway	HSPB1	DNA; Proliferation differentiation, inflammation	2.46574e-22	-1.31955	1	1	1.74821e-19	seurat_exp_10
119; MAPK-signaling-pathway	MAPK_signaling_pathway	FOS	DNA; Proliferation differentiation	7.42073e-22	-1.20476	1	1	5.2613e-19	seurat_exp_10
126; Endocrine-resistance	Endocrine_resistance	FOS	DNA; Transcription Proliferation	5.7042e-18	-1.78445	1	1	4.04428e-15	seurat_exp_10
16; VEGF-signaling-pathway	VEGF_signaling_pathway	HSPB1	Action reorganization; Migration	3.36644e-17	-0.578364	1	1	2.38681e-14	seurat_exp_10
107; Apoptosis	Apoptosis	MCL1	Bim-mediated mitochondrial apoptotic events; Apoptosis	1.96302e-16	-0.522362	1	1	1.39178e-13	seurat_exp_10
18; Rap1-signaling-pathway	Rap1_signaling_pathway	CDH1	Cell adhesion,migration,polarity	7.2014e-16	-0.826098	1	1	5.1058e-13	seurat_exp_10
21; TGF-beta-signaling-pathway	TGF_beta_signaling_pathway	CDKN2B	G1 arrest	1.79872e-15	-0.545811	1	1	1.2753e-12	seurat_exp_10
109; PI3K-Akt-signaling-pathway	PI3K_Akt_signaling_pathway	RXRA	Cell survival	6.55691e-15	-0.530254	1	1	4.64885e-12	seurat_exp_10
29; Toll-like-receptor-signaling-pathway	Toll_like_receptor_signaling_pathway	CXCL8	Chemotactic effects ( Nutrophil, Immature DC )( NK cell )	1.05777e-14	-1.54693	1	1	7.49957e-12	seurat_exp_10
19; mTOR-signaling-pathway	mTOR_signaling_pathway	PRKCA	Cytoskeletal organization	2.64838e-13	0.540923	1	1	1.8777e-10	seurat_exp_10
86; Toll-like-receptor-signaling-pathway	Toll_like_receptor_signaling_pathway	IL12A	Inflammatory cytokines;Proinflammatory effects	4.14191e-13	-0.803072	1	1	2.93661e-10	seurat_exp_10
34; Toll-like-receptor-signaling-pathway	Toll_like_receptor_signaling_pathway	IL1B	Inflammatory cytokines;Proinflammatory effects	4.77818e-13	-1.17094	1	1	3.38773e-10	seurat_exp_10
27; p53-signaling-pathway	p53_signaling_pathway	THBS1	Inflammhibition of angiogenesis and metastasis	6.07151e-13	-0.558936	1	1	4.3047e-10	seurat_exp_10
61; HIF-1-signaling-pathway	HIF_1_signaling_pathway	HMOX1	Increase oxygen delivery; Vascular tone	3.11194e-12	-0.758374	1	1	2.20637e-09	seurat_exp_10
39; Toll-like-receptor-signaling-pathway	Toll_like_receptor_signaling_pathway	IL6	Inflammatory cytokines;Proinflammatory effects	4.6041e-12	-0.918252	1	1	3.2643e-09	seurat_exp_10
24; JAK-STAT-signaling-pathway	JAK_STAT_signaling_pathway	MCL1	Anti-apoptosis	4.8528e-12	-0.571576	1	1	3.44063e-09	seurat_exp_10
62; mTOR-signaling-pathway	mTOR_signaling_pathway	TTI1		4.26015e-11	0.566327	1	1	3.02045e-08	seurat_exp_10
145; Endocrine-resistance	Endocrine_resistance	FOS	DNA; CoA overexpression AP1/SP1 overexpression; Transcription Proliferation	6.57078e-11	-1.06829	1	1	4.65868e-08	seurat_exp_10
70; mTOR-signaling-pathway	mTOR_signaling_pathway	TTI1		2.08552e-10	0.565822	1	1	1.47864e-07	seurat_exp_10
86; IL-17-signaling-pathway	IL_17_signaling_pathway	IL1B	Inflammantory genes; Antibacterial peptides Th17 cytokines; Inflammention; Host defence; Autoimmune	2.13857e-10	-0.63647	1	1	1.51625e-07	seurat_exp_10
172; NOD-like-receptor-signaling-pathway	NOD_like_receptor_signaling_pathway	CXCL8	Chemokines	3.87196e-10	-1.6388	1	1	2.74522e-07	seurat_exp_10
70; Apoptosis	Apoptosis	CFLAR	Pro-survival genes	8.33784e-10	-1.13803	1	1	5.91153e-07	seurat_exp_10
54; MAPK-signaling-pathway	MAPK_signaling_pathway	DDIT3	DNA; Proliferation differentiation, inflammation	9.94576e-10	-0.755504	1	1	7.05155e-07	seurat_exp_10
88; Hippo-signaling-pathway	Hippo_signaling_pathway	ID1	Anti-apoptotic genes; Pro-proliferation genes	2.84112e-09	-0.698715	1	1	2.01436e-06	seurat_exp_10
97; PI3K-Akt-signaling-pathway	PI3K_Akt_signaling_pathway	MCL1	Cell survival	3.20209e-09	-0.519008	1	1	2.27028e-06	seurat_exp_10
174; NOD-like-receptor-signaling-pathway	NOD_like_receptor_signaling_pathway	CCL2	Chemokines	4.06706e-09	-1.07281	1	1	2.88354e-06	seurat_exp_10
46; Toll-like-receptor-signaling-pathway	Toll_like_receptor_signaling_pathway	TNF	Inflammatory cytokines;Proinflammatory effects	5.03401e-09	-0.798584	1	1	3.56911e-06	seurat_exp_10
107; MAPK-signaling-pathway	MAPK_signaling_pathway	JUND	DNA; Proliferation differentiation, inflammation	5.76053e-09	-0.599504	1	1	4.08421e-06	seurat_exp_10
79; C-type-lectin-receptor-signaling-pathway	C_type_lectin_receptor_signaling_pathway	IL1B	Th1 Th17 cell differentiation	6.01089e-09	-0.959656	1	1	4.26172e-06	seurat_exp_10
40; TNF-signaling-pathway	TNF_signaling_pathway	JUN		6.32311e-09	-1.44826	1	1	4.48308e-06	seurat_exp_10
178; NOD-like-receptor-signaling-pathway	NOD_like_receptor_signaling_pathway	IL1B	Pro-inflammatory cytokines	8.69022e-09	-1.35326	1	1	6.16136e-06	seurat_exp_10
64; C-type-lectin-receptor-signaling-pathway	C_type_lectin_receptor_signaling_pathway	IL1B	Th1 Th17 cell differentiation	1.16381e-08	-1.08676	1	1	8.25143e-06	seurat_exp_10
56; ErbB-signaling-pathway	ErbB_signaling_pathway	JUN	DNA; Angiogenesis	1.23067e-08	-2.54055	1	1	8.72548e-06	seurat_exp_10
40; ErbB-signaling-pathway	ErbB_signaling_pathway	ELK1	DNA; Angiogenesis	1.28227e-08	-1.66957	1	1	9.09129e-06	seurat_exp_10
15; MAPK-signaling-pathway	MAPK_signaling_pathway	NFKB1	Proliferation inflammation anti-apoptosis	1.67906e-08	-0.76933	1	1	1.19045e-05	seurat_exp_10
11; HIF-1-signaling-pathway	HIF_1_signaling_pathway	SLC2A1	Reduce oxygen consumption; Promote anaerobic metabolism	1.73884e-08	-0.836114	1	1	1.23284e-05	seurat_exp_10
78; C-type-lectin-receptor-signaling-pathway	C_type_lectin_receptor_signaling_pathway	IL12A	Th1 Th17 cell differentiation	2.19123e-08	-0.708888	1	1	1.55358e-05	seurat_exp_10
173; NOD-like-receptor-signaling-pathway	NOD_like_receptor_signaling_pathway	CXCL1	Chemokines	2.75797e-08	-0.990339	1	1	1.9554e-05	seurat_exp_10
170; NOD-like-receptor-signaling-pathway	NOD_like_receptor_signaling_pathway	IL6	Pro-inflammatory cytokines	2.8703e-08	-1.06779	1	1	2.03504e-05	seurat_exp_10
77; C-type-lectin-receptor-signaling-pathway	C_type_lectin_receptor_signaling_pathway	IL6	Th1 Th17 cell differentiation	3.41885e-08	-0.799148	1	1	2.42396e-05	seurat_exp_10
76; C-type-lectin-receptor-signaling-pathway	C_type_lectin_receptor_signaling_pathway	IL23A	Th1 Th17 cell differentiation	3.61408e-08	-0.689504	1	1	2.56239e-05	seurat_exp_10
63; C-type-lectin-receptor-signaling-pathway	C_type_lectin_receptor_signaling_pathway	IL6	Th1 Th17 cell differentiation	4.15506e-08	-0.877644	1	1	2.94594e-05	seurat_exp_10
88; IL-17-signaling-pathway	IL_17_signaling_pathway	IL1B	Inflammantory genes; Proinflammantory activities?	4.36515e-08	-0.544237	1	1	3.09489e-05	seurat_exp_10
86; Apoptosis	Apoptosis	BCL2L11	Pro-apoptotic genes	4.5948e-08	-1.19973	1	1	3.25771e-05	seurat_exp_10
118; cAMP-signaling-pathway	cAMP_signaling_pathway	MYL9	Relaxation (endothelial cell, smooth muscle cell)	6.49293e-08	-0.637498	1	1	4.60349e-05	seurat_exp_10
87; Toll-like-receptor-signaling-pathway	Toll_like_receptor_signaling_pathway	CCL4L1	Chemotactic effects ( Nutrophil, Immature DC )( NK cell )	7.45498e-08	-0.756241	1	1	5.28558e-05	seurat_exp_10
48; ErbB-signaling-pathway	ErbB_signaling_pathway	CAMK2A	Cellular targets	8.42978e-08	-1.73792	1	1	5.97671e-05	seurat_exp_10
83; Apoptosis	Apoptosis	TP53	Pro-apoptotic genes	9.19945e-08	-1.30527	1	1	6.52241e-05	seurat_exp_10
58; MAPK-signaling-pathway	MAPK_signaling_pathway	ATF2	p53 signaling pathway; Proliferation differentiation, inflammation	9.65153e-08	-0.653086	1	1	6.84294e-05	seurat_exp_10
113; NF-kappa-B-signaling-pathway	NF_kappa_B_signaling_pathway	CFLAR	Survival	9.66528e-08	-3.09556	1	1	6.85269e-05	seurat_exp_10
62; C-type-lectin-receptor-signaling-pathway	C_type_lectin_receptor_signaling_pathway	IL23A	Th1 Th17 cell differentiation	9.80323e-08	-0.728589	1	1	6.95049e-05	seurat_exp_10
89; HIF-1-signaling-pathway	HIF_1_signaling_pathway	CDKN1A	Reduce oxygen consumption; Regulate proliferation and apoptosis	1.00056e-07	-0.524738	1	1	7.09397e-05	seurat_exp_10
93; NF-kappa-B-signaling-pathway	NF_kappa_B_signaling_pathway	PLAU	Survival	1.15563e-07	-0.620464	1	1	8.19339e-05	seurat_exp_10
85; Apoptosis	Apoptosis	FASLG	Pro-apoptotic genes	1.73999e-07	-1.14942	1	1	0.000123365	seurat_exp_10
71; Apoptosis	Apoptosis	GADD45G	Pro-survival genes	2.39049e-07	-0.922725	1	1	0.000169486	seurat_exp_10
183; NOD-like-receptor-signaling-pathway	NOD_like_receptor_signaling_pathway	CAMP	Antimicrobial peptides; Defensins	3.4054e-07	-0.698776	1	1	0.000241443	seurat_exp_10
55; MAPK-signaling-pathway	MAPK_signaling_pathway	ELK4	DNA; Proliferation differentiation, inflammation	3.53477e-07	-0.68164	1	1	0.000250615	seurat_exp_10
37; C-type-lectin-receptor-signaling-pathway	C_type_lectin_receptor_signaling_pathway	IL6	Th1 Th17 cell differentiation	3.94258e-07	-0.720659	1	1	0.000279529	seurat_exp_10
38; C-type-lectin-receptor-signaling-pathway	C_type_lectin_receptor_signaling_pathway	IL12A	Th1 Th17 cell differentiation	4.35271e-07	-0.615031	1	1	0.000308607	seurat_exp_10
56; MAPK-signaling-pathway	MAPK_signaling_pathway	TP53	p53 signaling pathway; Proliferation differentiation, inflammation	5.30526e-07	-0.697308	1	1	0.000376143	seurat_exp_10
84; Apoptosis	Apoptosis	FAS	Pro-apoptotic genes	7.32044e-07	-1.22069	1	1	0.000519019	seurat_exp_10
101; C-type-lectin-receptor-signaling-pathway	C_type_lectin_receptor_signaling_pathway	TNF	Th1 Th17 cell differentiation	7.67374e-07	-0.760924	1	1	0.000544068	seurat_exp_10
171; NOD-like-receptor-signaling-pathway	NOD_like_receptor_signaling_pathway	TNF	Pro-inflammatory cytokines	9.98887e-07	-0.881545	1	1	0.000708211	seurat_exp_10
116; NF-kappa-B-signaling-pathway	NF_kappa_B_signaling_pathway	GADD45B	Survival	1.25842e-06	-3.14642	1	1	0.00089222	seurat_exp_10
102; C-type-lectin-receptor-signaling-pathway	C_type_lectin_receptor_signaling_pathway	IL10	Th1 Th17 cell differentiation	1.40761e-06	-0.605164	1	1	0.000997997	seurat_exp_10
6; Fc-epsilon-RI-signaling-pathway	Fc_epsilon_RI_signaling_pathway	C00696	Generation of eicosanoids	1.68596e-06	-0.512592	1	1	0.00119535	seurat_exp_10
7; Fc-epsilon-RI-signaling-pathway	Fc_epsilon_RI_signaling_pathway	C05952	Generation of eicosanoids	1.68596e-06	-0.512592	1	1	0.00119535	seurat_exp_10
8; Fc-epsilon-RI-signaling-pathway	Fc_epsilon_RI_signaling_pathway	C05951	Generation of eicosanoids	1.68596e-06	-0.512592	1	1	0.00119535	seurat_exp_10
9; Fc-epsilon-RI-signaling-pathway	Fc_epsilon_RI_signaling_pathway	C02166	Generation of eicosanoids	1.68596e-06	-0.512592	1	1	0.00119535	seurat_exp_10
76; Toll-like-receptor-signaling-pathway	Toll_like_receptor_signaling_pathway	CCL3L3	Chemotactic effects ( Nutrophil, Immature DC )( NK cell )	3.08485e-06	-0.689397	1	1	0.00218716	seurat_exp_10
169; NOD-like-receptor-signaling-pathway	NOD_like_receptor_signaling_pathway	IL18	Pro-inflammatory cytokines	3.5216e-06	-0.789	1	1	0.00249682	seurat_exp_10
40; Toll-like-receptor-signaling-pathway	Toll_like_receptor_signaling_pathway	CCL5	Chemotactic effects ( Nutrophil, Immature DC )( NK cell )	3.74995e-06	-0.921893	1	1	0.00265871	seurat_exp_10
3; NF-kappa-B-signaling-pathway	NF_kappa_B_signaling_pathway	BCL2	Survival	3.83181e-06	-2.50692	1	1	0.00271675	seurat_exp_10
57; MAPK-signaling-pathway	MAPK_signaling_pathway	ELK1	p53 signaling pathway; Proliferation differentiation, inflammation	4.46395e-06	-0.537477	1	1	0.00316494	seurat_exp_10
35; Wnt-signaling-pathway	Wnt_signaling_pathway	JUN		4.59085e-06	-0.531724	1	1	0.00325491	seurat_exp_10
12; Toll-like-receptor-signaling-pathway	Toll_like_receptor_signaling_pathway	NFKB1	Degradation	5.59339e-06	-0.712933	1	1	0.00396571	seurat_exp_10
53; NF-kappa-B-signaling-pathway	NF_kappa_B_signaling_pathway	CXCL8	Survival	6.24055e-06	-4.34168	1	1	0.00442455	seurat_exp_10
182; NOD-like-receptor-signaling-pathway	NOD_like_receptor_signaling_pathway	C16054...		1.30602e-05	-0.601674	1	1	0.00925968	seurat_exp_10
7; T-cell-receptor-signaling-pathway	T_cell_receptor_signaling_pathway	CSF2	Proliferation Differentation; Immuno response	1.38267e-05	-1.09103	1	1	0.00980316	seurat_exp_10
142; NF-kappa-B-signaling-pathway	NF_kappa_B_signaling_pathway	NFKB2	Activation of noncanonical pathway	1.56713e-05	-3.44073	1	1	0.011111	seurat_exp_10
164; cGMP-PKG-signaling-pathway	cGMP_PKG_signaling_pathway	PPIF	Cardioprotection	1.81597e-05	-0.960518	1	1	0.0128752	seurat_exp_10
95; Rap1-signaling-pathway	Rap1_signaling_pathway	THBS1	Defective angiogensis	2.17704e-05	-1.0595	1	1	0.0154352	seurat_exp_10
108; MAPK-signaling-pathway	MAPK_signaling_pathway	JUN	DNA; Proliferation differentiation, inflammation	2.26049e-05	-0.666214	1	1	0.0160269	seurat_exp_10
72; Apoptosis	Apoptosis	BCL2A1	Pro-survival genes	2.46466e-05	-1.10222	1	1	0.0174744	seurat_exp_10
96; NF-kappa-B-signaling-pathway	NF_kappa_B_signaling_pathway	BCL2A1	Survival	2.65088e-05	-0.542043	1	1	0.0187947	seurat_exp_10
128; NF-kappa-B-signaling-pathway	NF_kappa_B_signaling_pathway	IL1B	Positive feedback	2.78826e-05	-3.91966	1	1	0.0197688	seurat_exp_10
11; T-cell-receptor-signaling-pathway	T_cell_receptor_signaling_pathway	IL4	Proliferation Differentation; Immuno response	3.20954e-05	-1.03206	1	1	0.0227556	seurat_exp_10
149; C-type-lectin-receptor-signaling-pathway	C_type_lectin_receptor_signaling_pathway	IL6	Th1 Th17 cell differentiation	3.26238e-05	-2.46059	1	1	0.0231303	seurat_exp_10
14; Rap1-signaling-pathway	Rap1_signaling_pathway	MAPK14	Proliferation survival gene activation	3.46686e-05	-0.643751	1	1	0.0245801	seurat_exp_10
173; C-type-lectin-receptor-signaling-pathway	C_type_lectin_receptor_signaling_pathway	C00584	Th1 Th17 cell differentiation	3.82537e-05	-1.47243	1	1	0.0271219	seurat_exp_10
160; C-type-lectin-receptor-signaling-pathway	C_type_lectin_receptor_signaling_pathway	CCL22	Th2 cell differentiation	3.95698e-05	-1.17173	1	1	0.028055	seurat_exp_10
129; C-type-lectin-receptor-signaling-pathway	C_type_lectin_receptor_signaling_pathway	IL12A	Th1 Th17 cell differentiation	3.97383e-05	-1.48409	1	1	0.0281745	seurat_exp_10
129; NF-kappa-B-signaling-pathway	NF_kappa_B_signaling_pathway	PTGS2	Inflammation	4.00246e-05	-3.11297	1	1	0.0283775	seurat_exp_10
55; C-type-lectin-receptor-signaling-pathway	C_type_lectin_receptor_signaling_pathway	IL10	Th2 cell differentiation	4.8842e-05	-0.98688	1	1	0.034629	seurat_exp_10
36; TNF-signaling-pathway	TNF_signaling_pathway	CREB3		5.19054e-05	-1.08582	1	1	0.0368009	seurat_exp_10
88; C-type-lectin-receptor-signaling-pathway	C_type_lectin_receptor_signaling_pathway	IL23A	Th1 Th17 cell differentiation	5.3169e-05	-1.68293	1	1	0.0376968	seurat_exp_10
9; T-cell-receptor-signaling-pathway	T_cell_receptor_signaling_pathway	IL10	Proliferation Differentation; Immuno response	5.61673e-05	-1.05943	1	1	0.0398226	seurat_exp_10
12; T-cell-receptor-signaling-pathway	T_cell_receptor_signaling_pathway	IL2	Proliferation Differentation; Immuno response	6.15171e-05	-1.09827	1	1	0.0436156	seurat_exp_10
9; Calcium-signaling-pathway	Calcium_signaling_pathway	NOS1	Other signaling pathways	3.53411e-84	1.29429	1	1	2.50569e-81	seurat_exp_11
8; Calcium-signaling-pathway	Calcium_signaling_pathway	PDE1A	Other signaling pathways	7.43666e-84	1.23422	1	1	5.27259e-81	seurat_exp_11
25; Calcium-signaling-pathway	Calcium_signaling_pathway	CAMK4	Proliferation; Fertilization; Learning and memory	6.58384e-83	1.24589	1	1	4.66794e-80	seurat_exp_11
26; Calcium-signaling-pathway	Calcium_signaling_pathway	PPP3CA	Proliferation; Fertilization; Learning and memory	5.29959e-82	1.2174	1	1	3.75741e-79	seurat_exp_11
42; Calcium-signaling-pathway	Calcium_signaling_pathway	MYLK4	Contraction	1.13816e-81	1.17342	1	1	8.06953e-79	seurat_exp_11
7; Calcium-signaling-pathway	Calcium_signaling_pathway	ADCY1	Other signaling pathways	1.46639e-80	1.08001	1	1	1.03967e-77	seurat_exp_11
45; Calcium-signaling-pathway	Calcium_signaling_pathway	PHKA1	Contraction;Metabolism	5.66807e-80	1.11772	1	1	4.01866e-77	seurat_exp_11
74; PPAR-signaling-pathway	PPAR_signaling_pathway	DBI	Fatty acid transport; Lipid metabolism	1.5642e-69	2.8976	1	1	1.10901e-66	seurat_exp_11
42; PPAR-signaling-pathway	PPAR_signaling_pathway	CD36	Fatty acid transport; Lipid metabolism	6.92995e-69	3.74182	1	1	4.91333e-66	seurat_exp_11
53; PPAR-signaling-pathway	PPAR_signaling_pathway	ACOX1	Fatty acid oxidation; Lipit metabolism	2.55997e-68	1.8972	1	1	1.81502e-65	seurat_exp_11
52; PPAR-signaling-pathway	PPAR_signaling_pathway	ANGPTL4	Adipocyte differentiation	1.32731e-67	2.16664	1	1	9.41064e-65	seurat_exp_11
73; PPAR-signaling-pathway	PPAR_signaling_pathway	UBC	Ubiquitination	3.04802e-66	2.11009	1	1	2.16105e-63	seurat_exp_11
77; PPAR-signaling-pathway	PPAR_signaling_pathway	UCP1	Adaptive themogenesis	1.82334e-65	1.62287	1	1	1.29275e-62	seurat_exp_11
75; PPAR-signaling-pathway	PPAR_signaling_pathway	APOA5	Ketogenesis; Lipid metabolism	5.07518e-65	1.63649	1	1	3.5983e-62	seurat_exp_11
34; PPAR-signaling-pathway	PPAR_signaling_pathway	ACADL	Fatty acid oxidation; Lipit metabolism	4.09072e-64	1.71304	1	1	2.90032e-61	seurat_exp_11
55; PPAR-signaling-pathway	PPAR_signaling_pathway	FABP1	Fatty acid transport; Lipid metabolism	9.45121e-64	1.65627	1	1	6.70091e-61	seurat_exp_11
39; PPAR-signaling-pathway	PPAR_signaling_pathway	ACSL1	Fatty acid transport; Lipid metabolism	2.14375e-63	1.76125	1	1	1.51992e-60	seurat_exp_11
57; PPAR-signaling-pathway	PPAR_signaling_pathway	APOA2	Ketogenesis; Lipid metabolism	6.32751e-63	1.66009	1	1	4.4862e-60	seurat_exp_11
69; PPAR-signaling-pathway	PPAR_signaling_pathway	CYP8B1	Cholesterol metabolism; Lipid metabilism	6.52636e-63	1.61588	1	1	4.62719e-60	seurat_exp_11
68; PPAR-signaling-pathway	PPAR_signaling_pathway	APOC3	Ketogenesis; Lipid metabolism	3.35146e-62	1.63884	1	1	2.37618e-59	seurat_exp_11
44; PPAR-signaling-pathway	PPAR_signaling_pathway	CYP7A1	Cholesterol metabolism; Lipid metabilism	9.94611e-61	1.57214	1	1	7.05179e-58	seurat_exp_11
36; PPAR-signaling-pathway	PPAR_signaling_pathway	EHHADH	Fatty acid oxidation; Lipit metabolism	1.22311e-60	1.68249	1	1	8.67187e-58	seurat_exp_11
47; PPAR-signaling-pathway	PPAR_signaling_pathway	SLC27A4	Fatty acid transport; Lipid metabolism	2.62331e-60	1.72866	1	1	1.85993e-57	seurat_exp_11
48; PPAR-signaling-pathway	PPAR_signaling_pathway	HMGCS1	Ketogenesis; Lipid metabolism	4.56269e-60	1.67546	1	1	3.23495e-57	seurat_exp_11
72; PPAR-signaling-pathway	PPAR_signaling_pathway	APOA1	Ketogenesis; Lipid metabolism	1.76309e-59	1.58488	1	1	1.25003e-56	seurat_exp_11
16; VEGF-signaling-pathway	VEGF_signaling_pathway	HSPB1	Action reorganization; Migration	9.60821e-59	1.50704	1	1	6.81222e-56	seurat_exp_11
69; MAPK-signaling-pathway	MAPK_signaling_pathway	HSPB1	DNA; Proliferation differentiation, inflammation	5.50163e-57	1.63999	1	1	3.90065e-54	seurat_exp_11
96; PI3K-Akt-signaling-pathway	PI3K_Akt_signaling_pathway	BCL2	Cell survival	7.6425e-57	-0.687475	1	1	5.41853e-54	seurat_exp_11
64; PPAR-signaling-pathway	PPAR_signaling_pathway	ADIPOQ	Adipocyte differentiation	2.45837e-56	1.17002	1	1	1.74298e-53	seurat_exp_11
31; PPAR-signaling-pathway	PPAR_signaling_pathway	SCP2	Fatty acid oxidation; Lipit metabolism	2.67804e-56	1.82609	1	1	1.89873e-53	seurat_exp_11
40; PPAR-signaling-pathway	PPAR_signaling_pathway	OLR1	Fatty acid transport; Lipid metabolism	3.13125e-56	1.18608	1	1	2.22005e-53	seurat_exp_11
38; PPAR-signaling-pathway	PPAR_signaling_pathway	CPT1C	Fatty acid oxidation; Lipit metabolism	3.17213e-56	1.42436	1	1	2.24904e-53	seurat_exp_11
101; cGMP-PKG-signaling-pathway	cGMP_PKG_signaling_pathway	CREB3	Increased expression of anti-apoptotic proteins; Decreased activity of caspase -3;Inhibition of apoptosos	4.22211e-56	-0.705964	1	1	2.99348e-53	seurat_exp_11
21; PPAR-signaling-pathway	PPAR_signaling_pathway	PLIN2	Adipocyte differentiation	1.68121e-55	1.15691	1	1	1.19198e-52	seurat_exp_11
32; PPAR-signaling-pathway	PPAR_signaling_pathway	ACAA1	Fatty acid oxidation; Lipit metabolism	2.15335e-55	1.74388	1	1	1.52673e-52	seurat_exp_11
164; cGMP-PKG-signaling-pathway	cGMP_PKG_signaling_pathway	PPIF	Cardioprotection	2.45367e-55	1.48743	1	1	1.73966e-52	seurat_exp_11
18; PPAR-signaling-pathway	PPAR_signaling_pathway	AQP7B...	Gluconeogenesis	2.71116e-55	1.15257	1	1	1.92222e-52	seurat_exp_11
19; PPAR-signaling-pathway	PPAR_signaling_pathway	GK	Gluconeogenesis	2.86824e-55	1.19818	1	1	2.03358e-52	seurat_exp_11
76; PPAR-signaling-pathway	PPAR_signaling_pathway	ME3	Lipogenesis;; Lipid metabolism	2.17326e-53	1.83081	1	1	1.54084e-50	seurat_exp_11
106; cGMP-PKG-signaling-pathway	cGMP_PKG_signaling_pathway	ATP1B4...		1.57732e-52	-0.643991	1	1	1.11832e-49	seurat_exp_11
41; PPAR-signaling-pathway	PPAR_signaling_pathway	LPL	Fatty acid transport; Lipid metabolism	3.42099e-52	1.30381	1	1	2.42548e-49	seurat_exp_11
20; PPAR-signaling-pathway	PPAR_signaling_pathway	PCK1	Gluconeogenesis	5.69899e-52	1.13286	1	1	4.04058e-49	seurat_exp_11
62; PI3K-Akt-signaling-pathway	PI3K_Akt_signaling_pathway	CDK2	Cell cycle progression	3.66436e-51	-0.765863	1	1	2.59803e-48	seurat_exp_11
51; PPAR-signaling-pathway	PPAR_signaling_pathway	FABP4	Adipocyte differentiation	8.78755e-51	1.05917	1	1	6.23037e-48	seurat_exp_11
38; TNF-signaling-pathway	TNF_signaling_pathway	CEBPB		1.52931e-50	1.54514	1	1	1.08428e-47	seurat_exp_11
37; PPAR-signaling-pathway	PPAR_signaling_pathway	CPT2	Fatty acid oxidation; Lipit metabolism	2.75628e-50	1.45325	1	1	1.9542e-47	seurat_exp_11
20; Cell-cycle	Cell_cycle	MCM2	DNA; DNA biosynthesis	9.01687e-50	-3.19768	1	1	6.39296e-47	seurat_exp_11
52; cGMP-PKG-signaling-pathway	cGMP_PKG_signaling_pathway	CACNA1C		1.03671e-49	0.710131	1	1	7.35025e-47	seurat_exp_11
67; PPAR-signaling-pathway	PPAR_signaling_pathway	FADS2	Lipogenesis;; Lipid metabolism	1.33495e-49	1.2925	1	1	9.4648e-47	seurat_exp_11
33; AMPK-signaling-pathway	AMPK_signaling_pathway	CPT1C	Increased FFA oxidation	1.4478e-49	1.03904	1	1	1.02649e-46	seurat_exp_11
54; PPAR-signaling-pathway	PPAR_signaling_pathway	ILK	Cell survival	4.19458e-49	1.40643	1	1	2.97396e-46	seurat_exp_11
105; cGMP-PKG-signaling-pathway	cGMP_PKG_signaling_pathway	SLC8A2		1.11932e-48	-0.682699	1	1	7.93597e-46	seurat_exp_11
33; PPAR-signaling-pathway	PPAR_signaling_pathway	ACADM	Fatty acid oxidation; Lipit metabolism	1.10177e-47	1.2599	1	1	7.81152e-45	seurat_exp_11
107; cGMP-PKG-signaling-pathway	cGMP_PKG_signaling_pathway	ATP2B1		3.26456e-47	-0.632344	1	1	2.31457e-44	seurat_exp_11
24; p53-signaling-pathway	p53_signaling_pathway	SERPINB5	Inflammhibition of angiogenesis and metastasis	4.52423e-47	1.36207	1	1	3.20768e-44	seurat_exp_11
102; TNF-signaling-pathway	TNF_signaling_pathway	AKT3		8.45062e-47	-0.868661	1	1	5.99149e-44	seurat_exp_11
43; PPAR-signaling-pathway	PPAR_signaling_pathway	FABP3	Fatty acid transport; Lipid metabolism	1.16906e-46	1.35573	1	1	8.28862e-44	seurat_exp_11
38; IL-17-signaling-pathway	IL_17_signaling_pathway	CEBPB		1.08707e-45	1.08851	1	1	7.7073e-43	seurat_exp_11
86; cGMP-PKG-signaling-pathway	cGMP_PKG_signaling_pathway	ATP2A1	Increased calcium sequestration	1.73648e-45	-0.752397	1	1	1.23116e-42	seurat_exp_11
49; PPAR-signaling-pathway	PPAR_signaling_pathway	SORBS1	Adipocyte differentiation	2.0814e-45	1.15112	1	1	1.47571e-42	seurat_exp_11
164; C-type-lectin-receptor-signaling-pathway	C_type_lectin_receptor_signaling_pathway	EGR2	Th1 Th17 cell differentiation	5.87465e-45	1.85689	1	1	4.16513e-42	seurat_exp_11
70; PPAR-signaling-pathway	PPAR_signaling_pathway	NR1H3	Cholesterol metabolism; Lipid metabilism	6.57489e-44	1.0613	1	1	4.6616e-41	seurat_exp_11
66; PPAR-signaling-pathway	PPAR_signaling_pathway	SCD	Lipogenesis;; Lipid metabolism	9.25007e-44	1.11246	1	1	6.5583e-41	seurat_exp_11
41; FoxO-signaling-pathway	FoxO_signaling_pathway	CDKN2B	Cell cycle regulation	1.13543e-43	0.990713	1	1	8.05021e-41	seurat_exp_11
103; cGMP-PKG-signaling-pathway	cGMP_PKG_signaling_pathway	VASP	Cell growth and differentiantion; Platelet inhibition	4.06695e-43	-0.736821	1	1	2.88346e-40	seurat_exp_11
56; PPAR-signaling-pathway	PPAR_signaling_pathway	PDPK1	Cell survival	7.63944e-43	1.64158	1	1	5.41636e-40	seurat_exp_11
5; Cytosolic-DNA-sensing-pathway	Cytosolic_DNA_sensing_pathway	IL18	Proinflammatory cytokine processing;Pyroptosis	3.47198e-42	1.1816	1	1	2.46164e-39	seurat_exp_11
50; PPAR-signaling-pathway	PPAR_signaling_pathway	MMP1	Adipocyte differentiation	7.18615e-42	0.819884	1	1	5.09498e-39	seurat_exp_11
16; mTOR-signaling-pathway	mTOR_signaling_pathway	LPIN1	Lipid biosynthesis	3.61284e-40	-0.893769	1	1	2.56151e-37	seurat_exp_11
155; Chemokine-signaling-pathway	Chemokine_signaling_pathway	PXN	Migration	1.52003e-39	-0.981888	1	1	1.0777e-36	seurat_exp_11
101; PI3K-Akt-signaling-pathway	PI3K_Akt_signaling_pathway	PKN3	Action reorganization	5.03887e-39	-0.53516	1	1	3.57256e-36	seurat_exp_11
23; Fc-epsilon-RI-signaling-pathway	Fc_epsilon_RI_signaling_pathway	AKT3	DNA; Cytokine gene transcription	5.96294e-38	-0.889531	1	1	4.22773e-35	seurat_exp_11
100; PI3K-Akt-signaling-pathway	PI3K_Akt_signaling_pathway	PRKCA	Cglucose uptake; Vesicle transpory	1.01707e-37	-0.594918	1	1	7.21101e-35	seurat_exp_11
42; Fc-gamma-R-mediated-phagocytosis	Fc_gamma_R_mediated_phagocytosis	MYO10	Phagocytosis; Membrane remodeling; Focal exocytosis; Pseudopod extention; Particle internalization	1.07042e-37	-0.712957	1	1	7.58928e-35	seurat_exp_11
58; PPAR-signaling-pathway	PPAR_signaling_pathway	PLTP	Ketogenesis; Lipid metabolism	8.0409e-37	0.980146	1	1	5.701e-34	seurat_exp_11
54; AMPK-signaling-pathway	AMPK_signaling_pathway	SLC2A4	Activated mitochondrial biogeneses	1.37136e-36	-1.03309	1	1	9.72292e-34	seurat_exp_11
20; NOD-like-receptor-signaling-pathway	NOD_like_receptor_signaling_pathway	IL18		1.33957e-35	2.83737	1	1	9.49758e-33	seurat_exp_11
30; Fc-epsilon-RI-signaling-pathway	Fc_epsilon_RI_signaling_pathway	PRKCA	DNA; Cytokine gene transcription	6.16903e-35	-0.833432	1	1	4.37384e-32	seurat_exp_11
64; Complement-and-coagulation-cascades	Complement_and_coagulation_cascades	VSIG4	Phagocytosis	1.11403e-34	-1.95994	1	1	7.8985e-32	seurat_exp_11
21; TGF-beta-signaling-pathway	TGF_beta_signaling_pathway	CDKN2B	G1 arrest	1.87186e-33	0.991866	1	1	1.32715e-30	seurat_exp_11
32; mTOR-signaling-pathway	mTOR_signaling_pathway	ULK1	Autophagy	2.43614e-33	0.965625	1	1	1.72722e-30	seurat_exp_11
94; cGMP-PKG-signaling-pathway	cGMP_PKG_signaling_pathway	MAPK1	Platelet activation	5.53277e-33	-0.715492	1	1	3.92273e-30	seurat_exp_11
103; PI3K-Akt-signaling-pathway	PI3K_Akt_signaling_pathway	BCL2	Cell survival	1.26552e-32	-0.585898	1	1	8.97252e-30	seurat_exp_11
35; ErbB-signaling-pathway	ErbB_signaling_pathway	CBL	Receptor ubiquitylation;Degradation	1.71037e-32	1.09275	1	1	1.21265e-29	seurat_exp_11
27; JAK-STAT-signaling-pathway	JAK_STAT_signaling_pathway	PIM1	Anti-apoptosis	1.44515e-31	0.772995	1	1	1.02461e-28	seurat_exp_11
48; ErbB-signaling-pathway	ErbB_signaling_pathway	CAMK2A	Cellular targets	4.05125e-31	0.883651	1	1	2.87234e-28	seurat_exp_11
56; ErbB-signaling-pathway	ErbB_signaling_pathway	JUN	DNA; Angiogenesis	4.87151e-31	1.08243	1	1	3.4539e-28	seurat_exp_11
95; NF-kappa-B-signaling-pathway	NF_kappa_B_signaling_pathway	BCL2L1	Survival	8.48304e-31	1.32476	1	1	6.01448e-28	seurat_exp_11
53; mTOR-signaling-pathway	mTOR_signaling_pathway	GRB10	Lipolysis	2.20978e-30	-0.845973	1	1	1.56673e-27	seurat_exp_11
100; cGMP-PKG-signaling-pathway	cGMP_PKG_signaling_pathway	BAD	Decreasedrelease of cytochrom C; Decreased activity of caspase -3;Inhibition of apoptosos	6.49759e-30	-0.602355	1	1	4.60679e-27	seurat_exp_11
96; NF-kappa-B-signaling-pathway	NF_kappa_B_signaling_pathway	BCL2A1	Survival	9.14047e-30	0.920998	1	1	6.48059e-27	seurat_exp_11
47; ErbB-signaling-pathway	ErbB_signaling_pathway	PRKCA	Cellular targets	1.02285e-28	0.812158	1	1	7.252e-26	seurat_exp_11
4; Cell-cycle	Cell_cycle	ORC6	DNA; DNA biosynthesis	2.54936e-28	-0.536827	1	1	1.8075e-25	seurat_exp_11
166; TNF-signaling-pathway	TNF_signaling_pathway	IFNB1		2.70726e-28	-0.706017	1	1	1.91944e-25	seurat_exp_11
89; C-type-lectin-receptor-signaling-pathway	C_type_lectin_receptor_signaling_pathway	IL2	Th1 Th17 cell differentiation	4.05132e-28	1.00841	1	1	2.87238e-25	seurat_exp_11
157; C-type-lectin-receptor-signaling-pathway	C_type_lectin_receptor_signaling_pathway	IL10	Th1 Th17 cell differentiation	5.3729e-28	0.982136	1	1	3.80938e-25	seurat_exp_11
63; Complement-and-coagulation-cascades	Complement_and_coagulation_cascades	ITGAX	Phagocytosis	3.02369e-27	-1.86239	1	1	2.1438e-24	seurat_exp_11
12; MAPK-signaling-pathway	MAPK_signaling_pathway	PLA2G4B		3.3222e-27	0.640556	1	1	2.35544e-24	seurat_exp_11
57; ErbB-signaling-pathway	ErbB_signaling_pathway	ABL1		3.89843e-27	1.01456	1	1	2.76398e-24	seurat_exp_11
49; Wnt-signaling-pathway	Wnt_signaling_pathway	RBX1	Proteolysis	8.0526e-27	-0.578506	1	1	5.7093e-24	seurat_exp_11
159; C-type-lectin-receptor-signaling-pathway	C_type_lectin_receptor_signaling_pathway	PTGS2	Th1 Th17 cell differentiation	1.69995e-26	0.917279	1	1	1.20527e-23	seurat_exp_11
53; p53-signaling-pathway	p53_signaling_pathway	CCND1	G1 arrest( sustaines); Cell cycle arrest	2.97705e-26	-0.634796	1	1	2.11073e-23	seurat_exp_11
47; Fc-epsilon-RI-signaling-pathway	Fc_epsilon_RI_signaling_pathway	MAPK8	DNA; Cytokine gene transcription	3.33713e-26	-1.05575	1	1	2.36603e-23	seurat_exp_11
25; PI3K-Akt-signaling-pathway	PI3K_Akt_signaling_pathway	CDKN1B	Cell cycle progression	8.51332e-26	0.553833	1	1	6.03595e-23	seurat_exp_11
95; Endocrine-resistance	Endocrine_resistance	E2F1	Cell cycle progression	1.34669e-25	-0.786713	1	1	9.54801e-23	seurat_exp_11
52; Hippo-signaling-pathway	Hippo_signaling_pathway	ITGB2	Anti-apoptotic genes; Pro-proliferation genes	1.58017e-25	-0.580002	1	1	1.12034e-22	seurat_exp_11
29; ErbB-signaling-pathway	ErbB_signaling_pathway	STAT5A	DNA; Survival	1.7881e-25	1.19253	1	1	1.26777e-22	seurat_exp_11
62; mTOR-signaling-pathway	mTOR_signaling_pathway	TTI1		2.0685e-25	-0.737913	1	1	1.46657e-22	seurat_exp_11
5; PI3K-Akt-signaling-pathway	PI3K_Akt_signaling_pathway	EIF4B	Protein synthesis	9.85594e-25	-0.645821	1	1	6.98786e-22	seurat_exp_11
12; p53-signaling-pathway	p53_signaling_pathway	CCNE1	G1 arrest( sustaines); Cell cycle arrest	1.28882e-24	-0.672983	1	1	9.13773e-22	seurat_exp_11
40; ErbB-signaling-pathway	ErbB_signaling_pathway	ELK1	DNA; Angiogenesis	3.41457e-24	0.874656	1	1	2.42093e-21	seurat_exp_11
19; Toll-like-receptor-signaling-pathway	Toll_like_receptor_signaling_pathway	CXCL10	Chemptactic effects ( T cell )	4.18496e-24	-1.8765	1	1	2.96714e-21	seurat_exp_11
33; PI3K-Akt-signaling-pathway	PI3K_Akt_signaling_pathway	TP53	Cell survival	9.59605e-24	0.599054	1	1	6.8036e-21	seurat_exp_11
82; AMPK-signaling-pathway	AMPK_signaling_pathway	HMGCR	Inhibited cholesterol synthesis	1.54214e-23	0.5863	1	1	1.09338e-20	seurat_exp_11
62; Complement-and-coagulation-cascades	Complement_and_coagulation_cascades	ITGAM	Phagocytosis	1.72305e-23	-1.74086	1	1	1.22165e-20	seurat_exp_11
43; FoxO-signaling-pathway	FoxO_signaling_pathway	CDKN1A	Cell cycle regulation	1.89489e-23	0.521247	1	1	1.34347e-20	seurat_exp_11
11; HIF-1-signaling-pathway	HIF_1_signaling_pathway	SLC2A1	Reduce oxygen consumption; Promote anaerobic metabolism	8.45962e-23	1.07031	1	1	5.99787e-20	seurat_exp_11
22; Toll-like-receptor-signaling-pathway	Toll_like_receptor_signaling_pathway	CD86	Costimulatory molecules; T cell stimulation	1.12855e-22	-0.816877	1	1	8.00141e-20	seurat_exp_11
57; p53-signaling-pathway	p53_signaling_pathway	CCNB1	G2 arrest( sustaines); Cell cycle arrest	1.38464e-22	-0.56579	1	1	9.81708e-20	seurat_exp_11
77; Toll-like-receptor-signaling-pathway	Toll_like_receptor_signaling_pathway	CXCL9	Chemptactic effects ( T cell )	1.69068e-22	-1.70818	1	1	1.19869e-19	seurat_exp_11
119; Apoptosis	Apoptosis	BCL2	Pro-survival genes	2.36682e-22	-0.546143	1	1	1.67808e-19	seurat_exp_11
66; Complement-and-coagulation-cascades	Complement_and_coagulation_cascades	C3AR1	Degranulation, chemotaxis	2.97713e-22	-1.56591	1	1	2.11078e-19	seurat_exp_11
26; Cytosolic-DNA-sensing-pathway	Cytosolic_DNA_sensing_pathway	IL33	Proinflammatory cytokine processing;Pyroptosis	6.19565e-22	0.71146	1	1	4.39272e-19	seurat_exp_11
23; Toll-like-receptor-signaling-pathway	Toll_like_receptor_signaling_pathway	CD40	Costimulatory molecules; T cell stimulation	8.89927e-22	-0.896739	1	1	6.30959e-19	seurat_exp_11
85; Cell-cycle	Cell_cycle	RAD21		1.34449e-21	-0.988794	1	1	9.53246e-19	seurat_exp_11
7; Apoptosis	Apoptosis	ENDOG	DNA fragmentation; Apoptosis	1.72273e-21	-0.937027	1	1	1.22142e-18	seurat_exp_11
33; HIF-1-signaling-pathway	HIF_1_signaling_pathway	C00186	Lactate	2.03706e-21	0.665962	1	1	1.44428e-18	seurat_exp_11
11; Fc-epsilon-RI-signaling-pathway	Fc_epsilon_RI_signaling_pathway	C00374	Degranulation; Heparin; Toxic to parasites; Increase vascular permeabilityl Cause smiith muscle contraction	3.79526e-21	-0.683834	1	1	2.69084e-18	seurat_exp_11
12; Fc-epsilon-RI-signaling-pathway	Fc_epsilon_RI_signaling_pathway	C00388	Degranulation; Histamine; Toxic to parasites; Increase vascular permeabilityl Cause smiith muscle contraction	3.79526e-21	-0.683834	1	1	2.69084e-18	seurat_exp_11
63; Ras-signaling-pathway	Ras_signaling_pathway	TIAM1	Effectors	3.82134e-21	0.542372	1	1	2.70933e-18	seurat_exp_11
18; Toll-like-receptor-signaling-pathway	Toll_like_receptor_signaling_pathway	CXCL11	Chemptactic effects ( T cell )	4.38461e-21	-1.42321	1	1	3.10869e-18	seurat_exp_11
48; TNF-signaling-pathway	TNF_signaling_pathway	CASP3	Apoptosis	4.9752e-21	-0.512893	1	1	3.52742e-18	seurat_exp_11
48; Toll-like-receptor-signaling-pathway	Toll_like_receptor_signaling_pathway	CD80	Costimulatory molecules; T cell stimulation	8.90318e-21	-0.732115	1	1	6.31236e-18	seurat_exp_11
66; Toll-like-receptor-signaling-pathway	Toll_like_receptor_signaling_pathway	CASP8		8.91603e-21	-0.791867	1	1	6.32146e-18	seurat_exp_11
138; Chemokine-signaling-pathway	Chemokine_signaling_pathway	FOXO3	DNA; Cytokine production; Cellular gowth and differentiation; Cell survival; Migration; Apoptosis	1.08219e-20	0.625229	1	1	7.67274e-18	seurat_exp_11
120; C-type-lectin-receptor-signaling-pathway	C_type_lectin_receptor_signaling_pathway	IL17D	Th1 Th17 cell differentiation	4.23337e-20	0.73269	1	1	3.00146e-17	seurat_exp_11
19; mTOR-signaling-pathway	mTOR_signaling_pathway	PRKCA	Cytoskeletal organization	6.04995e-20	-0.662223	1	1	4.28941e-17	seurat_exp_11
11; Apoptosis	Apoptosis	DFFB	DNA fragmentation; Apoptosis	8.86584e-20	-0.862083	1	1	6.28588e-17	seurat_exp_11
71; Complement-and-coagulation-cascades	Complement_and_coagulation_cascades	CR1	Phagocytosis	1.32679e-18	-1.44635	1	1	9.40691e-16	seurat_exp_11
103; AMPK-signaling-pathway	AMPK_signaling_pathway	ULK1	Increased autophagy	1.86903e-18	0.521204	1	1	1.32515e-15	seurat_exp_11
31; Wnt-signaling-pathway	Wnt_signaling_pathway	MMP7		2.33026e-18	-0.550016	1	1	1.65216e-15	seurat_exp_11
43; ErbB-signaling-pathway	ErbB_signaling_pathway	PTK2	Adhesion Migration	4.31675e-18	0.839493	1	1	3.06058e-15	seurat_exp_11
55; NF-kappa-B-signaling-pathway	NF_kappa_B_signaling_pathway	CXCL12	Myeloiesis and B-cell lymphopoieses	3.53112e-17	-1.56653	1	1	2.50356e-14	seurat_exp_11
110; PI3K-Akt-signaling-pathway	PI3K_Akt_signaling_pathway	BCL2	Cell survival	6.4662e-17	-0.560105	1	1	4.58453e-14	seurat_exp_11
94; NF-kappa-B-signaling-pathway	NF_kappa_B_signaling_pathway	BCL2L1	Survival	7.79275e-17	0.742801	1	1	5.52506e-14	seurat_exp_11
18; mTOR-signaling-pathway	mTOR_signaling_pathway	RHOA	Cytoskeletal organization	1.40713e-16	-0.625964	1	1	9.97653e-14	seurat_exp_11
76; Hippo-signaling-pathway	Hippo_signaling_pathway	MYC	Anti-apoptotic genes; Pro-proliferation genes	2.30132e-16	-0.863583	1	1	1.63164e-13	seurat_exp_11
137; NF-kappa-B-signaling-pathway	NF_kappa_B_signaling_pathway	ICAM1	Lymphocyte adhesion, T-cell costimulation	2.48141e-16	-3.5561	1	1	1.75932e-13	seurat_exp_11
54; NF-kappa-B-signaling-pathway	NF_kappa_B_signaling_pathway	CCL13	Lymphoid-tissue homing	4.17028e-16	-2.35756	1	1	2.95673e-13	seurat_exp_11
136; NF-kappa-B-signaling-pathway	NF_kappa_B_signaling_pathway	TNFSF13B	B-cell development; B-cell survival	4.21701e-16	-2.27117	1	1	2.98986e-13	seurat_exp_11
20; Toll-like-receptor-signaling-pathway	Toll_like_receptor_signaling_pathway	IFNB1	Antiviral effects	4.83513e-16	-0.88682	1	1	3.4281e-13	seurat_exp_11
50; HIF-1-signaling-pathway	HIF_1_signaling_pathway	TF	Increase oxygen delivery; Iron metabolism	5.49988e-16	-0.570477	1	1	3.89942e-13	seurat_exp_11
169; NOD-like-receptor-signaling-pathway	NOD_like_receptor_signaling_pathway	IL18	Pro-inflammatory cytokines	8.73864e-16	0.944958	1	1	6.1957e-13	seurat_exp_11
56; MAPK-signaling-pathway	MAPK_signaling_pathway	TP53	p53 signaling pathway; Proliferation differentiation, inflammation	1.11006e-15	0.718618	1	1	7.87036e-13	seurat_exp_11
118; cAMP-signaling-pathway	cAMP_signaling_pathway	MYL9	Relaxation (endothelial cell, smooth muscle cell)	2.0475e-15	-0.780126	1	1	1.45168e-12	seurat_exp_11
57; Complement-and-coagulation-cascades	Complement_and_coagulation_cascades	PLAUR	Cell adhesion,migration,proliferation	5.18532e-15	-0.71025	1	1	3.67639e-12	seurat_exp_11
53; MAPK-signaling-pathway	MAPK_signaling_pathway	MAX	DNA; Proliferation differentiation, inflammation	6.97283e-15	0.513478	1	1	4.94374e-12	seurat_exp_11
31; Complement-and-coagulation-cascades	Complement_and_coagulation_cascades	C6...	Membrane attack complex; Cell lysis	7.78695e-15	-1.14897	1	1	5.52095e-12	seurat_exp_11
70; mTOR-signaling-pathway	mTOR_signaling_pathway	TTI1		1.88796e-14	-0.632753	1	1	1.33857e-11	seurat_exp_11
135; NF-kappa-B-signaling-pathway	NF_kappa_B_signaling_pathway	CCL19	Lymphoid-tissue homing	2.55248e-14	-4.77061	1	1	1.80971e-11	seurat_exp_11
3; ErbB-signaling-pathway	ErbB_signaling_pathway	ELK1	DNA; Migration/ Invasion	3.38364e-14	0.770737	1	1	2.399e-11	seurat_exp_11
134; NF-kappa-B-signaling-pathway	NF_kappa_B_signaling_pathway	CCL21	Lymphoid-tissue homing	4.68863e-14	-1.8695	1	1	3.32424e-11	seurat_exp_11
48; Rap1-signaling-pathway	Rap1_signaling_pathway	PARD3	Cell adhesion,migration,polarity	1.00036e-13	0.745043	1	1	7.09255e-11	seurat_exp_11
17; Rap1-signaling-pathway	Rap1_signaling_pathway	ACTB	Cell adhesion,migration,polarity	1.11228e-13	-1.01986	1	1	7.88605e-11	seurat_exp_11
82; Rap1-signaling-pathway	Rap1_signaling_pathway	ITGA2B	Cell adhesion,migration,polarity	1.30531e-13	-0.899921	1	1	9.25468e-11	seurat_exp_11
79; Ras-signaling-pathway	Ras_signaling_pathway	RAC1	Cell spreading and migration	1.50023e-13	0.727178	1	1	1.06366e-10	seurat_exp_11
13; Hippo-signaling-pathway	Hippo_signaling_pathway	BIRC5	Anti-apoptotic genes; Pro-proliferation genes	3.01694e-13	-0.540793	1	1	2.13901e-10	seurat_exp_11
21; Toll-like-receptor-signaling-pathway	Toll_like_receptor_signaling_pathway	IFNA1	Antiviral effects	1.03465e-12	-0.922158	1	1	7.33569e-10	seurat_exp_11
19; NOD-like-receptor-signaling-pathway	NOD_like_receptor_signaling_pathway	IL1B		4.74512e-12	-1.13805	1	1	3.36429e-09	seurat_exp_11
49; NOD-like-receptor-signaling-pathway	NOD_like_receptor_signaling_pathway	IL18		6.02239e-12	0.750049	1	1	4.26988e-09	seurat_exp_11
75; Chemokine-signaling-pathway	Chemokine_signaling_pathway	WAS		9.69362e-12	-0.763029	1	1	6.87277e-09	seurat_exp_11
34; TGF-beta-signaling-pathway	TGF_beta_signaling_pathway	ROCK1		9.61882e-11	-0.574842	1	1	6.81974e-08	seurat_exp_11
65; Complement-and-coagulation-cascades	Complement_and_coagulation_cascades	C5AR1	Degranulation, chemotaxis	1.15864e-10	-1.33384	1	1	8.21477e-08	seurat_exp_11
67; Rap1-signaling-pathway	Rap1_signaling_pathway	AKT3	Proliferation survival gene activation	1.32043e-10	-0.780672	1	1	9.36182e-08	seurat_exp_11
61; Complement-and-coagulation-cascades	Complement_and_coagulation_cascades	CR2		3.66549e-10	-1.49173	1	1	2.59883e-07	seurat_exp_11
50; NF-kappa-B-signaling-pathway	NF_kappa_B_signaling_pathway	NFKBIA	Negative feedback	4.27655e-10	-2.0553	1	1	3.03207e-07	seurat_exp_11
80; Hippo-signaling-pathway	Hippo_signaling_pathway	BIRC2	Anti-apoptotic genes; Pro-proliferation genes	9.8953e-10	-0.87083	1	1	7.01577e-07	seurat_exp_11
20; mTOR-signaling-pathway	mTOR_signaling_pathway	SGK1	Cell survival	1.18095e-09	-0.597667	1	1	8.37291e-07	seurat_exp_11
38; Fc-gamma-R-mediated-phagocytosis	Fc_gamma_R_mediated_phagocytosis	CFL1	Phagocytosis; Membrane traficking; Particle internalization; Phagosome closure; Phagosome-lysosome fusion	1.64315e-09	-0.569456	1	1	1.16499e-06	seurat_exp_11
54; Chemokine-signaling-pathway	Chemokine_signaling_pathway	ROCK1		2.69102e-09	-0.523068	1	1	1.90794e-06	seurat_exp_11
42; MAPK-signaling-pathway	MAPK_signaling_pathway	Wnt signaling pathway		3.01341e-09	-0.565107	1	1	2.13651e-06	seurat_exp_11
50; C-type-lectin-receptor-signaling-pathway	C_type_lectin_receptor_signaling_pathway	IL17D	Tfh cell differentiation	4.0483e-09	-2.65142	1	1	2.87024e-06	seurat_exp_11
120; TNF-signaling-pathway	TNF_signaling_pathway	DNM1L	Necroptosis	5.10092e-09	-0.968945	1	1	3.61655e-06	seurat_exp_11
69; Apoptosis	Apoptosis	PTPN13	Pro-survival genes	5.2265e-09	0.945617	1	1	3.70559e-06	seurat_exp_11
123; Endocrine-resistance	Endocrine_resistance	CARM1	DNA; CoA overexpression AP1/SP1 overexpression; Transcription Proliferation	7.67375e-09	-0.552355	1	1	5.44069e-06	seurat_exp_11
5; IL-17-signaling-pathway	IL_17_signaling_pathway	IL6	Chemokines; Autoimmune pathology; Neutrophil recruitment; Immunity to extracellular pathogens	4.13919e-08	-0.642012	1	1	2.93468e-05	seurat_exp_11
77; Hippo-signaling-pathway	Hippo_signaling_pathway	CCND1	Anti-apoptotic genes; Pro-proliferation genes	9.53335e-08	-0.719828	1	1	6.75915e-05	seurat_exp_11
12; Hippo-signaling-pathway	Hippo_signaling_pathway	CTGF	Anti-apoptotic genes; Pro-proliferation genes	1.36989e-07	-0.581465	1	1	9.71249e-05	seurat_exp_11
108; NF-kappa-B-signaling-pathway	NF_kappa_B_signaling_pathway	IKBKG		1.43339e-07	-0.967661	1	1	0.000101627	seurat_exp_11
51; NF-kappa-B-signaling-pathway	NF_kappa_B_signaling_pathway	TNFAIP3	Negative feedback	1.46445e-07	-1.86164	1	1	0.00010383	seurat_exp_11
78; Hippo-signaling-pathway	Hippo_signaling_pathway	SOX2	Anti-apoptotic genes; Pro-proliferation genes	2.08492e-07	-0.700906	1	1	0.000147821	seurat_exp_11
75; Hippo-signaling-pathway	Hippo_signaling_pathway	NKD1	Anti-apoptotic genes; Pro-proliferation genes	4.12409e-07	-0.694559	1	1	0.000292398	seurat_exp_11
74; Hippo-signaling-pathway	Hippo_signaling_pathway	AXIN1	Anti-apoptotic genes; Pro-proliferation genes	5.63348e-07	-0.673254	1	1	0.000399414	seurat_exp_11
168; C-type-lectin-receptor-signaling-pathway	C_type_lectin_receptor_signaling_pathway	IL12A	Th1 Th17 cell differentiation	7.38053e-07	1.16176	1	1	0.000523279	seurat_exp_11
60; Hippo-signaling-pathway	Hippo_signaling_pathway	CTGF	Anti-apoptotic genes; Pro-proliferation genes	9.32336e-07	-0.779657	1	1	0.000661026	seurat_exp_11
95; Rap1-signaling-pathway	Rap1_signaling_pathway	THBS1	Defective angiogensis	3.49182e-06	-1.07445	1	1	0.0024757	seurat_exp_11
57; HIF-1-signaling-pathway	HIF_1_signaling_pathway	TIMP1	Increase oxygen delivery; Angiogenesis	4.04005e-06	-0.642339	1	1	0.00286439	seurat_exp_11
63; HIF-1-signaling-pathway	HIF_1_signaling_pathway	TIMP1	Matrix and barrier functions	4.04005e-06	-0.642339	1	1	0.00286439	seurat_exp_11
79; Hippo-signaling-pathway	Hippo_signaling_pathway	SNAI2	Anti-apoptotic genes; Pro-proliferation genes	5.20638e-06	-0.569575	1	1	0.00369132	seurat_exp_11
4; Cytosolic-DNA-sensing-pathway	Cytosolic_DNA_sensing_pathway	IL1B	Proinflammatory cytokine processing;Pyroptosis	1.36864e-54	2.19904	1	1	9.70369e-52	seurat_exp_12
19; NOD-like-receptor-signaling-pathway	NOD_like_receptor_signaling_pathway	IL1B		2.4523e-49	4.16977	1	1	1.73868e-46	seurat_exp_12
33; HIF-1-signaling-pathway	HIF_1_signaling_pathway	C00186	Lactate	5.01722e-40	1.22738	1	1	3.55721e-37	seurat_exp_12
56; ErbB-signaling-pathway	ErbB_signaling_pathway	JUN	DNA; Angiogenesis	7.98884e-39	3.29464	1	1	5.66409e-36	seurat_exp_12
11; HIF-1-signaling-pathway	HIF_1_signaling_pathway	SLC2A1	Reduce oxygen consumption; Promote anaerobic metabolism	9.31463e-39	2.05677	1	1	6.60407e-36	seurat_exp_12
11; Complement-and-coagulation-cascades	Complement_and_coagulation_cascades	F2R	Anti-inflammatory responess, vasodilation,increased endothelial permeability, release of Weibel-Palade bodies	2.00749e-37	3.11085	1	1	1.42331e-34	seurat_exp_12
69; MAPK-signaling-pathway	MAPK_signaling_pathway	HSPB1	DNA; Proliferation differentiation, inflammation	9.56655e-37	2.17119	1	1	6.78269e-34	seurat_exp_12
116; EGFR-tyrosine-kinase-inhibitor-resistance	EGFR_tyrosine_kinase_inhibitor_resistance	STAT3	Abnormal dimerization of STAT 3; DNA; Differentiation; Growth; Proliferation; Survival; Motility; Angiogenesis	1.26209e-34	2.8963	1	1	8.94819e-32	seurat_exp_12
38; TNF-signaling-pathway	TNF_signaling_pathway	CEBPB		2.09984e-34	1.65335	1	1	1.48879e-31	seurat_exp_12
57; ErbB-signaling-pathway	ErbB_signaling_pathway	ABL1		1.26566e-33	2.62082	1	1	8.97354e-31	seurat_exp_12
43; ErbB-signaling-pathway	ErbB_signaling_pathway	PTK2	Adhesion Migration	2.02133e-33	2.78596	1	1	1.43313e-30	seurat_exp_12
47; ErbB-signaling-pathway	ErbB_signaling_pathway	PRKCA	Cellular targets	5.11781e-33	2.75089	1	1	3.62853e-30	seurat_exp_12
48; ErbB-signaling-pathway	ErbB_signaling_pathway	CAMK2A	Cellular targets	7.17961e-33	2.74953	1	1	5.09034e-30	seurat_exp_12
35; ErbB-signaling-pathway	ErbB_signaling_pathway	CBL	Receptor ubiquitylation;Degradation	7.96648e-33	2.76275	1	1	5.64823e-30	seurat_exp_12
58; Complement-and-coagulation-cascades	Complement_and_coagulation_cascades	F2RL2	Anti-inflammatory responess, vasodilation,increased endothelial permeability, release of Weibel-Palade bodies	1.04469e-32	1.33342	1	1	7.40687e-30	seurat_exp_12
33; C-type-lectin-receptor-signaling-pathway	C_type_lectin_receptor_signaling_pathway	IL1B	Th1 Th17 cell differentiation	1.21343e-31	3.99356	1	1	8.60324e-29	seurat_exp_12
24; p53-signaling-pathway	p53_signaling_pathway	SERPINB5	Inflammhibition of angiogenesis and metastasis	1.92631e-31	1.1559	1	1	1.36575e-28	seurat_exp_12
6; Calcium-signaling-pathway	Calcium_signaling_pathway	ITPKA	Other signaling pathways	2.10837e-31	0.539295	1	1	1.49484e-28	seurat_exp_12
38; IL-17-signaling-pathway	IL_17_signaling_pathway	CEBPB		2.02842e-30	0.977264	1	1	1.43815e-27	seurat_exp_12
34; Toll-like-receptor-signaling-pathway	Toll_like_receptor_signaling_pathway	IL1B	Inflammatory cytokines;Proinflammatory effects	3.91496e-30	2.00188	1	1	2.77571e-27	seurat_exp_12
29; ErbB-signaling-pathway	ErbB_signaling_pathway	STAT5A	DNA; Survival	7.77748e-30	2.50569	1	1	5.51423e-27	seurat_exp_12
40; ErbB-signaling-pathway	ErbB_signaling_pathway	ELK1	DNA; Angiogenesis	1.13206e-29	2.14929	1	1	8.02629e-27	seurat_exp_12
76; cAMP-signaling-pathway	cAMP_signaling_pathway	C00416		6.97074e-29	0.728017	1	1	4.94225e-26	seurat_exp_12
168; C-type-lectin-receptor-signaling-pathway	C_type_lectin_receptor_signaling_pathway	IL12A	Th1 Th17 cell differentiation	1.30623e-28	2.52527	1	1	9.2612e-26	seurat_exp_12
160; C-type-lectin-receptor-signaling-pathway	C_type_lectin_receptor_signaling_pathway	CCL22	Th2 cell differentiation	1.66096e-28	2.49638	1	1	1.17762e-25	seurat_exp_12
55; C-type-lectin-receptor-signaling-pathway	C_type_lectin_receptor_signaling_pathway	IL10	Th2 cell differentiation	2.40885e-28	2.6834	1	1	1.70788e-25	seurat_exp_12
57; C-type-lectin-receptor-signaling-pathway	C_type_lectin_receptor_signaling_pathway	IL12A	Th2 cell differentiation	3.81142e-28	-1.93497	1	1	2.7023e-25	seurat_exp_12
161; C-type-lectin-receptor-signaling-pathway	C_type_lectin_receptor_signaling_pathway	CCL17	Th2 cell differentiation	1.756e-27	3.05409	1	1	1.245e-24	seurat_exp_12
178; NOD-like-receptor-signaling-pathway	NOD_like_receptor_signaling_pathway	IL1B	Pro-inflammatory cytokines	2.97201e-27	2.56717	1	1	2.10716e-24	seurat_exp_12
52; MAPK-signaling-pathway	MAPK_signaling_pathway	MEF2C	DNA; Proliferation differentiation, inflammation	1.54846e-26	1.79489	1	1	1.09786e-23	seurat_exp_12
22; C-type-lectin-receptor-signaling-pathway	C_type_lectin_receptor_signaling_pathway	IL23A	Th2 cell differentiation	2.86608e-26	-1.83661	1	1	2.03205e-23	seurat_exp_12
7; Complement-and-coagulation-cascades	Complement_and_coagulation_cascades	C00290		3.65292e-25	1.26754	1	1	2.58992e-22	seurat_exp_12
48; NOD-like-receptor-signaling-pathway	NOD_like_receptor_signaling_pathway	IL1B		6.64543e-25	1.35079	1	1	4.71161e-22	seurat_exp_12
25; p53-signaling-pathway	p53_signaling_pathway	CD82	Inflammhibition of angiogenesis and metastasis	7.57735e-25	0.826137	1	1	5.37234e-22	seurat_exp_12
43; FoxO-signaling-pathway	FoxO_signaling_pathway	CDKN1A	Cell cycle regulation	1.02573e-24	0.627852	1	1	7.27245e-22	seurat_exp_12
88; Hippo-signaling-pathway	Hippo_signaling_pathway	ID1	Anti-apoptotic genes; Pro-proliferation genes	2.77997e-24	0.983566	1	1	1.971e-21	seurat_exp_12
30; JAK-STAT-signaling-pathway	JAK_STAT_signaling_pathway	CDKN1A	Cell-cycle inhibition	3.29294e-24	0.797159	1	1	2.3347e-21	seurat_exp_12
125; Endocrine-resistance	Endocrine_resistance	JUN	DNA; Transcription Proliferation	5.09658e-24	3.45286	1	1	3.61347e-21	seurat_exp_12
88; IL-17-signaling-pathway	IL_17_signaling_pathway	IL1B	Inflammantory genes; Proinflammantory activities?	6.2305e-24	1.74136	1	1	4.41742e-21	seurat_exp_12
3; ErbB-signaling-pathway	ErbB_signaling_pathway	ELK1	DNA; Migration/ Invasion	2.67354e-23	1.95971	1	1	1.89554e-20	seurat_exp_12
56; C-type-lectin-receptor-signaling-pathway	C_type_lectin_receptor_signaling_pathway	IL6	Th2 cell differentiation	1.21571e-22	-1.50746	1	1	8.61939e-20	seurat_exp_12
51; Fc-gamma-R-mediated-phagocytosis	Fc_gamma_R_mediated_phagocytosis	NCF1	NADPH oxidase; Digestion of bacterium; Respiratory burst in phagosome	4.54831e-22	1.38092	1	1	3.22475e-19	seurat_exp_12
55; MAPK-signaling-pathway	MAPK_signaling_pathway	ELK4	DNA; Proliferation differentiation, inflammation	6.54173e-22	1.79285	1	1	4.63809e-19	seurat_exp_12
8; ErbB-signaling-pathway	ErbB_signaling_pathway	STAT5A	DNA;Differentiation	1.18356e-21	1.63329	1	1	8.39141e-19	seurat_exp_12
123; cAMP-signaling-pathway	cAMP_signaling_pathway	PAK1	Cytoskeletal remodelling, acherens junction enhancerment (vascular endothelial cell)	1.33928e-21	0.920629	1	1	9.49551e-19	seurat_exp_12
86; IL-17-signaling-pathway	IL_17_signaling_pathway	IL1B	Inflammantory genes; Antibacterial peptides Th17 cytokines; Inflammention; Host defence; Autoimmune	1.7758e-21	1.68006	1	1	1.25904e-18	seurat_exp_12
148; C-type-lectin-receptor-signaling-pathway	C_type_lectin_receptor_signaling_pathway	IL1B	Th1 Th17 cell differentiation	1.07378e-20	2.72333	1	1	7.61311e-18	seurat_exp_12
52; PPAR-signaling-pathway	PPAR_signaling_pathway	ANGPTL4	Adipocyte differentiation	1.88003e-20	0.67871	1	1	1.33294e-17	seurat_exp_12
164; cGMP-PKG-signaling-pathway	cGMP_PKG_signaling_pathway	PPIF	Cardioprotection	2.61735e-20	2.3449	1	1	1.8557e-17	seurat_exp_12
14; Hippo-signaling-pathway	Hippo_signaling_pathway	AREG	Anti-apoptotic genes; Pro-proliferation genes	3.59617e-20	0.890135	1	1	2.54968e-17	seurat_exp_12
172; NOD-like-receptor-signaling-pathway	NOD_like_receptor_signaling_pathway	CXCL8	Chemokines	7.68121e-20	1.6771	1	1	5.44598e-17	seurat_exp_12
29; Toll-like-receptor-signaling-pathway	Toll_like_receptor_signaling_pathway	CXCL8	Chemotactic effects ( Nutrophil, Immature DC )( NK cell )	1.05922e-19	1.09956	1	1	7.50987e-17	seurat_exp_12
29; B-cell-receptor-signaling-pathway	B_cell_receptor_signaling_pathway	RAC1		1.25927e-19	0.681523	1	1	8.92823e-17	seurat_exp_12
126; Endocrine-resistance	Endocrine_resistance	FOS	DNA; Transcription Proliferation	1.90256e-19	2.41463	1	1	1.34892e-16	seurat_exp_12
55; Ras-signaling-pathway	Ras_signaling_pathway	AFDN	Cell-cell junctions	2.76517e-19	0.510694	1	1	1.96051e-16	seurat_exp_12
63; Ras-signaling-pathway	Ras_signaling_pathway	TIAM1	Effectors	3.52301e-19	0.607517	1	1	2.49782e-16	seurat_exp_12
42; Fc-gamma-R-mediated-phagocytosis	Fc_gamma_R_mediated_phagocytosis	MYO10	Phagocytosis; Membrane remodeling; Focal exocytosis; Pseudopod extention; Particle internalization	4.52116e-19	-0.576798	1	1	3.20551e-16	seurat_exp_12
38; Fc-gamma-R-mediated-phagocytosis	Fc_gamma_R_mediated_phagocytosis	CFL1	Phagocytosis; Membrane traficking; Particle internalization; Phagosome closure; Phagosome-lysosome fusion	5.24763e-19	-0.91686	1	1	3.72057e-16	seurat_exp_12
51; MAPK-signaling-pathway	MAPK_signaling_pathway	ATF4	DNA; Proliferation differentiation, inflammation	6.0085e-19	1.66621	1	1	4.26003e-16	seurat_exp_12
5; Cytosolic-DNA-sensing-pathway	Cytosolic_DNA_sensing_pathway	IL18	Proinflammatory cytokine processing;Pyroptosis	8.03286e-19	0.866235	1	1	5.69529e-16	seurat_exp_12
44; Fc-gamma-R-mediated-phagocytosis	Fc_gamma_R_mediated_phagocytosis	GSN	Phagocytosis; Membrane traficking; Particle internalization; Phagosome closure; Phagosome-lysosome fusion	9.35911e-19	1.05291	1	1	6.63561e-16	seurat_exp_12
128; NF-kappa-B-signaling-pathway	NF_kappa_B_signaling_pathway	IL1B	Positive feedback	1.8676e-18	2.13023	1	1	1.32413e-15	seurat_exp_12
145; Endocrine-resistance	Endocrine_resistance	FOS	DNA; CoA overexpression AP1/SP1 overexpression; Transcription Proliferation	3.70458e-18	2.59006	1	1	2.62655e-15	seurat_exp_12
173; NOD-like-receptor-signaling-pathway	NOD_like_receptor_signaling_pathway	CXCL1	Chemokines	3.7079e-18	1.65632	1	1	2.6289e-15	seurat_exp_12
53; MAPK-signaling-pathway	MAPK_signaling_pathway	MAX	DNA; Proliferation differentiation, inflammation	4.48941e-18	1.77518	1	1	3.18299e-15	seurat_exp_12
57; Complement-and-coagulation-cascades	Complement_and_coagulation_cascades	PLAUR	Cell adhesion,migration,proliferation	8.64966e-18	2.27251	1	1	6.13261e-15	seurat_exp_12
59; cAMP-signaling-pathway	cAMP_signaling_pathway	AFDN	Cytoskeletal rearrangenent((vascular endothelial cell)	1.81371e-17	0.702495	1	1	1.28592e-14	seurat_exp_12
54; MAPK-signaling-pathway	MAPK_signaling_pathway	DDIT3	DNA; Proliferation differentiation, inflammation	5.06276e-17	1.62563	1	1	3.5895e-14	seurat_exp_12
16; VEGF-signaling-pathway	VEGF_signaling_pathway	HSPB1	Action reorganization; Migration	5.46167e-17	0.718051	1	1	3.87233e-14	seurat_exp_12
41; FoxO-signaling-pathway	FoxO_signaling_pathway	CDKN2B	Cell cycle regulation	6.70748e-17	0.572008	1	1	4.7556e-14	seurat_exp_12
56; MAPK-signaling-pathway	MAPK_signaling_pathway	TP53	p53 signaling pathway; Proliferation differentiation, inflammation	1.23689e-16	1.49247	1	1	8.76954e-14	seurat_exp_12
97; Ras-signaling-pathway	Ras_signaling_pathway	PAK4...	Cytoskeleton organization; Cell motolity	4.04047e-16	0.570347	1	1	2.8647e-13	seurat_exp_12
69; Apoptosis	Apoptosis	PTPN13	Pro-survival genes	4.31629e-16	1.32915	1	1	3.06025e-13	seurat_exp_12
57; MAPK-signaling-pathway	MAPK_signaling_pathway	ELK1	p53 signaling pathway; Proliferation differentiation, inflammation	4.38274e-16	1.62592	1	1	3.10736e-13	seurat_exp_12
58; MAPK-signaling-pathway	MAPK_signaling_pathway	ATF2	p53 signaling pathway; Proliferation differentiation, inflammation	4.69363e-16	1.43035	1	1	3.32778e-13	seurat_exp_12
24; JAK-STAT-signaling-pathway	JAK_STAT_signaling_pathway	MCL1	Anti-apoptosis	6.08007e-16	0.502047	1	1	4.31077e-13	seurat_exp_12
15; MAPK-signaling-pathway	MAPK_signaling_pathway	NFKB1	Proliferation inflammation anti-apoptosis	8.21071e-16	2.09995	1	1	5.82139e-13	seurat_exp_12
53; NF-kappa-B-signaling-pathway	NF_kappa_B_signaling_pathway	CXCL8	Survival	1.58236e-15	0.759068	1	1	1.1219e-12	seurat_exp_12
23; ErbB-signaling-pathway	ErbB_signaling_pathway	RPS6KB1	Protein synthesis	2.93874e-15	1.7035	1	1	2.08356e-12	seurat_exp_12
27; JAK-STAT-signaling-pathway	JAK_STAT_signaling_pathway	PIM1	Anti-apoptosis	3.28835e-15	0.571014	1	1	2.33144e-12	seurat_exp_12
65; ErbB-signaling-pathway	ErbB_signaling_pathway	MYC	DNA; Adhesion	3.51279e-15	2.35326	1	1	2.49057e-12	seurat_exp_12
108; MAPK-signaling-pathway	MAPK_signaling_pathway	JUN	DNA; Proliferation differentiation, inflammation	5.59843e-15	0.550185	1	1	3.96929e-12	seurat_exp_12
40; TNF-signaling-pathway	TNF_signaling_pathway	JUN		1.30097e-14	0.683446	1	1	9.22389e-12	seurat_exp_12
54; AMPK-signaling-pathway	AMPK_signaling_pathway	SLC2A4	Activated mitochondrial biogeneses	1.90064e-14	-0.713958	1	1	1.34755e-11	seurat_exp_12
7; ErbB-signaling-pathway	ErbB_signaling_pathway	ERBB3	No signaling	3.05491e-14	-0.536449	1	1	2.16593e-11	seurat_exp_12
24; B-cell-receptor-signaling-pathway	B_cell_receptor_signaling_pathway	FOS	DNA; B cell ontogeny; Autoimmunity; Anergy; Immuno response Ig production GC formation	3.39356e-14	0.5129	1	1	2.40604e-11	seurat_exp_12
50; FoxO-signaling-pathway	FoxO_signaling_pathway	TNFSF10	Apoptosis	5.31483e-14	0.521629	1	1	3.76821e-11	seurat_exp_12
26; Cytosolic-DNA-sensing-pathway	Cytosolic_DNA_sensing_pathway	IL33	Proinflammatory cytokine processing;Pyroptosis	6.00381e-14	0.527374	1	1	4.2567e-11	seurat_exp_12
27; Fc-gamma-R-mediated-phagocytosis	Fc_gamma_R_mediated_phagocytosis	ARPC5	Phagocytosis; Membrane traficking; Particle internalization; Phagosome closure; Phagosome-lysosome fusion	8.49214e-14	0.664625	1	1	6.02093e-11	seurat_exp_12
20; NOD-like-receptor-signaling-pathway	NOD_like_receptor_signaling_pathway	IL18		1.2705e-13	0.865487	1	1	9.00784e-11	seurat_exp_12
131; Endocrine-resistance	Endocrine_resistance	BIK	Low BAD expression	1.74147e-13	0.593199	1	1	1.2347e-10	seurat_exp_12
79; Ras-signaling-pathway	Ras_signaling_pathway	RAC1	Cell spreading and migration	1.19918e-12	0.511653	1	1	8.5022e-10	seurat_exp_12
94; NF-kappa-B-signaling-pathway	NF_kappa_B_signaling_pathway	BCL2L1	Survival	1.4171e-12	0.575987	1	1	1.00472e-09	seurat_exp_12
84; Apoptosis	Apoptosis	FAS	Pro-apoptotic genes	1.42443e-12	0.949885	1	1	1.00992e-09	seurat_exp_12
85; Apoptosis	Apoptosis	FASLG	Pro-apoptotic genes	2.07563e-12	0.987819	1	1	1.47162e-09	seurat_exp_12
114; Apoptosis	Apoptosis	HRK	Pro-apoptotic genes	2.68931e-12	1.14661	1	1	1.90672e-09	seurat_exp_12
95; Rap1-signaling-pathway	Rap1_signaling_pathway	THBS1	Defective angiogensis	2.80183e-12	-1.20957	1	1	1.9865e-09	seurat_exp_12
85; Cell-cycle	Cell_cycle	RAD21		3.06298e-12	-0.833391	1	1	2.17165e-09	seurat_exp_12
14; Chemokine-signaling-pathway	Chemokine_signaling_pathway	PXN		5.41597e-12	0.776956	1	1	3.83992e-09	seurat_exp_12
159; C-type-lectin-receptor-signaling-pathway	C_type_lectin_receptor_signaling_pathway	PTGS2	Th1 Th17 cell differentiation	1.2053e-11	0.84588	1	1	8.5456e-09	seurat_exp_12
93; NF-kappa-B-signaling-pathway	NF_kappa_B_signaling_pathway	PLAU	Survival	1.32561e-11	0.677648	1	1	9.39856e-09	seurat_exp_12
50; PPAR-signaling-pathway	PPAR_signaling_pathway	MMP1	Adipocyte differentiation	1.46539e-11	1.16978	1	1	1.03896e-08	seurat_exp_12
58; HIF-1-signaling-pathway	HIF_1_signaling_pathway	EDN1	Increase oxygen delivery; Vascular tone	2.95888e-11	1.32107	1	1	2.09784e-08	seurat_exp_12
53; mTOR-signaling-pathway	mTOR_signaling_pathway	GRB10	Lipolysis	3.2598e-11	-0.501155	1	1	2.3112e-08	seurat_exp_12
21; TGF-beta-signaling-pathway	TGF_beta_signaling_pathway	CDKN2B	G1 arrest	1.24819e-10	0.518616	1	1	8.84966e-08	seurat_exp_12
89; HIF-1-signaling-pathway	HIF_1_signaling_pathway	CDKN1A	Reduce oxygen consumption; Regulate proliferation and apoptosis	1.28062e-10	0.919607	1	1	9.07956e-08	seurat_exp_12
79; C-type-lectin-receptor-signaling-pathway	C_type_lectin_receptor_signaling_pathway	IL1B	Th1 Th17 cell differentiation	1.40462e-10	1.18402	1	1	9.95874e-08	seurat_exp_12
129; NF-kappa-B-signaling-pathway	NF_kappa_B_signaling_pathway	PTGS2	Inflammation	4.66082e-10	0.912522	1	1	3.30452e-07	seurat_exp_12
170; NOD-like-receptor-signaling-pathway	NOD_like_receptor_signaling_pathway	IL6	Pro-inflammatory cytokines	5.56428e-10	1.21685	1	1	3.94508e-07	seurat_exp_12
86; Apoptosis	Apoptosis	BCL2L11	Pro-apoptotic genes	5.75239e-10	1.16158	1	1	4.07845e-07	seurat_exp_12
64; C-type-lectin-receptor-signaling-pathway	C_type_lectin_receptor_signaling_pathway	IL1B	Th1 Th17 cell differentiation	7.14147e-10	1.29244	1	1	5.06331e-07	seurat_exp_12
2; NF-kappa-B-signaling-pathway	NF_kappa_B_signaling_pathway	BCL2L1	Survival	1.80026e-09	0.563333	1	1	1.27638e-06	seurat_exp_12
133; NF-kappa-B-signaling-pathway	NF_kappa_B_signaling_pathway	CXCL2	Inflammation	2.09531e-09	1.34039	1	1	1.48558e-06	seurat_exp_12
39; Toll-like-receptor-signaling-pathway	Toll_like_receptor_signaling_pathway	IL6	Inflammatory cytokines;Proinflammatory effects	2.04442e-08	0.832773	1	1	1.44949e-05	seurat_exp_12
83; Apoptosis	Apoptosis	TP53	Pro-apoptotic genes	2.46006e-08	0.788106	1	1	1.74418e-05	seurat_exp_12
169; NOD-like-receptor-signaling-pathway	NOD_like_receptor_signaling_pathway	IL18	Pro-inflammatory cytokines	2.4922e-08	0.610265	1	1	1.76697e-05	seurat_exp_12
96; NF-kappa-B-signaling-pathway	NF_kappa_B_signaling_pathway	BCL2A1	Survival	6.2448e-08	0.751953	1	1	4.42757e-05	seurat_exp_12
51; RIG-I-like-receptor-signaling-pathway	RIG_I_like_receptor_signaling_pathway	CXCL8	Inflammatory cytokines; Protein synthesis; Growth arrest; Dendrition cell activation; NK cell activation; Antibody production; Apoptosis	8.94338e-08	0.677657	1	1	6.34086e-05	seurat_exp_12
114; NF-kappa-B-signaling-pathway	NF_kappa_B_signaling_pathway	BCL2A1	Survival	1.00098e-07	0.552216	1	1	7.09696e-05	seurat_exp_12
70; Apoptosis	Apoptosis	CFLAR	Pro-survival genes	2.07265e-07	0.855677	1	1	0.000146951	seurat_exp_12
17; Complement-and-coagulation-cascades	Complement_and_coagulation_cascades	PLG	Plasmin;Fibrin degradation products; coagulation	2.92622e-07	1.30212	1	1	0.000207469	seurat_exp_12
3; Apoptosis	Apoptosis	BCL2L1	Pro-survival genes	3.94524e-07	0.826673	1	1	0.000279717	seurat_exp_12
164; C-type-lectin-receptor-signaling-pathway	C_type_lectin_receptor_signaling_pathway	EGR2	Th1 Th17 cell differentiation	5.84277e-07	0.732621	1	1	0.000414252	seurat_exp_12
174; NOD-like-receptor-signaling-pathway	NOD_like_receptor_signaling_pathway	CCL2	Chemokines	1.09822e-06	1.15455	1	1	0.000778641	seurat_exp_12
183; NOD-like-receptor-signaling-pathway	NOD_like_receptor_signaling_pathway	CAMP	Antimicrobial peptides; Defensins	2.00855e-06	0.651802	1	1	0.00142406	seurat_exp_12
171; NOD-like-receptor-signaling-pathway	NOD_like_receptor_signaling_pathway	TNF	Pro-inflammatory cytokines	2.40259e-06	0.548205	1	1	0.00170344	seurat_exp_12
175; NOD-like-receptor-signaling-pathway	NOD_like_receptor_signaling_pathway	CCL5	Chemokines	6.50116e-06	0.816636	1	1	0.00460932	seurat_exp_12
48; HIF-1-signaling-pathway	HIF_1_signaling_pathway	PFKFB3	Reduce oxygen consumption; Promote anaerobic metabolism	1.00403e-05	0.927643	1	1	0.00711857	seurat_exp_12
13; VEGF-signaling-pathway	VEGF_signaling_pathway	C01312	PGI2production	1.02422e-05	0.60044	1	1	0.00726172	seurat_exp_12
47; HIF-1-signaling-pathway	HIF_1_signaling_pathway	PGK1	Reduce oxygen consumption; Promote anaerobic metabolism	1.13176e-05	1.03149	1	1	0.00802419	seurat_exp_12
72; Apoptosis	Apoptosis	BCL2A1	Pro-survival genes	1.15061e-05	1.2098	1	1	0.00815784	seurat_exp_12
42; MAPK-signaling-pathway	MAPK_signaling_pathway	Wnt signaling pathway		1.42779e-05	1.5153	1	1	0.010123	seurat_exp_12
153; TNF-signaling-pathway	TNF_signaling_pathway	MAPK14	Cell survival	1.60308e-05	1.77167	1	1	0.0113658	seurat_exp_12
42; HIF-1-signaling-pathway	HIF_1_signaling_pathway	HK1	Reduce oxygen consumption; Promote anaerobic metabolism	1.87245e-05	0.891835	1	1	0.0132756	seurat_exp_12
123; Endocrine-resistance	Endocrine_resistance	CARM1	DNA; CoA overexpression AP1/SP1 overexpression; Transcription Proliferation	2.05109e-05	1.91541	1	1	0.0145422	seurat_exp_12
46; HIF-1-signaling-pathway	HIF_1_signaling_pathway	ENO1	Reduce oxygen consumption; Promote anaerobic metabolism	2.6712e-05	0.802788	1	1	0.0189388	seurat_exp_12
7; Apoptosis	Apoptosis	ENDOG	DNA fragmentation; Apoptosis	2.7899e-05	-0.518781	1	1	0.0197804	seurat_exp_12
77; Toll-like-receptor-signaling-pathway	Toll_like_receptor_signaling_pathway	CXCL9	Chemptactic effects ( T cell )	1.77279e-39	4.34888	1	1	1.25691e-36	seurat_exp_13
19; Toll-like-receptor-signaling-pathway	Toll_like_receptor_signaling_pathway	CXCL10	Chemptactic effects ( T cell )	1.15802e-38	4.18567	1	1	8.21033e-36	seurat_exp_13
18; Toll-like-receptor-signaling-pathway	Toll_like_receptor_signaling_pathway	CXCL11	Chemptactic effects ( T cell )	1.72883e-35	3.57298	1	1	1.22574e-32	seurat_exp_13
54; RIG-I-like-receptor-signaling-pathway	RIG_I_like_receptor_signaling_pathway	CXCL10	Inflammatory cytokines; Protein synthesis; Growth arrest; Dendrition cell activation; NK cell activation; Antibody production; Apoptosis	9.73068e-30	4.58994	1	1	6.89905e-27	seurat_exp_13
44; T-cell-receptor-signaling-pathway	T_cell_receptor_signaling_pathway	PAK4...		1.40867e-28	1.76359	1	1	9.98746e-26	seurat_exp_13
38; Fc-gamma-R-mediated-phagocytosis	Fc_gamma_R_mediated_phagocytosis	CFL1	Phagocytosis; Membrane traficking; Particle internalization; Phagosome closure; Phagosome-lysosome fusion	3.48318e-28	-1.07251	1	1	2.46958e-25	seurat_exp_13
27; Fc-gamma-R-mediated-phagocytosis	Fc_gamma_R_mediated_phagocytosis	ARPC5	Phagocytosis; Membrane traficking; Particle internalization; Phagosome closure; Phagosome-lysosome fusion	4.31551e-28	2.57089	1	1	3.0597e-25	seurat_exp_13
14; Cytosolic-DNA-sensing-pathway	Cytosolic_DNA_sensing_pathway	CXCL10	Pro-inflammatory cytokines and chemokines	7.4568e-28	4.05989	1	1	5.28687e-25	seurat_exp_13
44; Fc-gamma-R-mediated-phagocytosis	Fc_gamma_R_mediated_phagocytosis	GSN	Phagocytosis; Membrane traficking; Particle internalization; Phagosome closure; Phagosome-lysosome fusion	8.39675e-28	2.07959	1	1	5.9533e-25	seurat_exp_13
16; B-cell-receptor-signaling-pathway	B_cell_receptor_signaling_pathway	VAV3...		1.04585e-27	0.630309	1	1	7.4151e-25	seurat_exp_13
108; Chemokine-signaling-pathway	Chemokine_signaling_pathway	STAT1	DNA; Cytokine production; Cellular gowth and differentiation; Cell survival Migration; Apoptosis	1.53254e-27	1.48006	1	1	1.08657e-24	seurat_exp_13
34; JAK-STAT-signaling-pathway	JAK_STAT_signaling_pathway	AOX1	Lipid metabolism	3.65321e-25	0.896553	1	1	2.59013e-22	seurat_exp_13
166; TNF-signaling-pathway	TNF_signaling_pathway	IFNB1		3.72793e-25	2.16337	1	1	2.6431e-22	seurat_exp_13
50; C-type-lectin-receptor-signaling-pathway	C_type_lectin_receptor_signaling_pathway	IL17D	Tfh cell differentiation	6.07002e-25	5.21332	1	1	4.30365e-22	seurat_exp_13
40; Toll-like-receptor-signaling-pathway	Toll_like_receptor_signaling_pathway	CCL5	Chemotactic effects ( Nutrophil, Immature DC )( NK cell )	6.33176e-25	2.47916	1	1	4.48922e-22	seurat_exp_13
25; Fc-epsilon-RI-signaling-pathway	Fc_epsilon_RI_signaling_pathway	MAPK14	DNA; Cytokine gene transcription	7.44004e-25	2.45267	1	1	5.27499e-22	seurat_exp_13
175; NOD-like-receptor-signaling-pathway	NOD_like_receptor_signaling_pathway	CCL5	Chemokines	9.2065e-25	2.46853	1	1	6.52741e-22	seurat_exp_13
6; Fc-epsilon-RI-signaling-pathway	Fc_epsilon_RI_signaling_pathway	C00696	Generation of eicosanoids	2.31194e-24	3.14041	1	1	1.63916e-21	seurat_exp_13
7; Fc-epsilon-RI-signaling-pathway	Fc_epsilon_RI_signaling_pathway	C05952	Generation of eicosanoids	2.31194e-24	3.14041	1	1	1.63916e-21	seurat_exp_13
8; Fc-epsilon-RI-signaling-pathway	Fc_epsilon_RI_signaling_pathway	C05951	Generation of eicosanoids	2.31194e-24	3.14041	1	1	1.63916e-21	seurat_exp_13
9; Fc-epsilon-RI-signaling-pathway	Fc_epsilon_RI_signaling_pathway	C02166	Generation of eicosanoids	2.31194e-24	3.14041	1	1	1.63916e-21	seurat_exp_13
51; Fc-gamma-R-mediated-phagocytosis	Fc_gamma_R_mediated_phagocytosis	NCF1	NADPH oxidase; Digestion of bacterium; Respiratory burst in phagosome	3.89105e-24	1.57098	1	1	2.75876e-21	seurat_exp_13
7; JAK-STAT-signaling-pathway	JAK_STAT_signaling_pathway	BCL2	Anti-apoptosis	6.62962e-24	0.921473	1	1	4.7004e-21	seurat_exp_13
1; JAK-STAT-signaling-pathway	JAK_STAT_signaling_pathway	MYC	Cell-cycle progression	1.0238e-23	0.754468	1	1	7.25871e-21	seurat_exp_13
36; JAK-STAT-signaling-pathway	JAK_STAT_signaling_pathway	GFAP	Differentation	1.24801e-23	0.857587	1	1	8.84837e-21	seurat_exp_13
[truncated: 7,218 more rows]

## Sheet: GSDensity pathways
Pahtway	cluster
Chemokine_signaling_pathway	seurat_exp_0
[truncated: 343 more rows]
