# Supplementary material for: Topology-aware pathway analysis of spatial transcriptomics
Source: PeerJ. 2025 Aug 14;13:e19729. doi: 10.7717/peerj.19729 (PMC12358110; doi:10.7717/peerj.19729)
Supplement: Supplemental Information 2 — The dataset contains four sheets: the first sheet lists significant marker genes identified for each cluster; the second sheet shows the results of overrepresentation analysis (ORA) performed on the marker genes; the third sheet includes cluster-specific significantly deregulated pathway branches identified using the PSF toolkit; and the fourth sheet presents cluster-specific pathways detected by the GSDensity method. [file peerj-13-19729-s002.xlsx]

## Sheet: Gene markers
Gene	p_val	avg_log2FC	pct.1	pct.2	p_val_adj	cluster
Ido1	1.18631e-285	1.27274	0.758	0.059	2.1674e-281	seurat_exp_0
Drd2	1.39474e-278	2.23383	0.964	0.207	2.54818e-274	seurat_exp_0
Lrrc10b	1.65039e-261	2.13797	0.964	0.24	3.01526e-257	seurat_exp_0
Adora2a	7.12924e-257	2.28628	0.981	0.275	1.30251e-252	seurat_exp_0
Gpr6	1.29253e-252	1.68357	0.886	0.148	2.36146e-248	seurat_exp_0
Syndig1l	6.47697e-249	2.18838	0.986	0.322	1.18334e-244	seurat_exp_0
Rgs9	1.52101e-234	2.62416	0.998	0.49	2.77889e-230	seurat_exp_0
Cd4	2.00208e-234	1.17984	0.713	0.073	3.6578e-230	seurat_exp_0
Drd1	8.29075e-232	1.93482	0.962	0.282	1.51472e-227	seurat_exp_0
Gpr88	6.48523e-226	2.99323	1	0.686	1.18485e-221	seurat_exp_0
Scn4b	8.00131e-226	2.62457	0.998	0.587	1.46184e-221	seurat_exp_0
Pde10a	5.58293e-225	2.75406	1	0.733	1.02e-220	seurat_exp_0
Ppp1r1b	7.89476e-223	2.90285	1	0.878	1.44237e-218	seurat_exp_0
Rasd2	1.34965e-222	2.37824	0.998	0.793	2.46582e-218	seurat_exp_0
Pde1b	1.07553e-217	2.36934	1	0.946	1.96499e-213	seurat_exp_0
Adcy5	4.93574e-217	2.27079	1	0.844	9.01759e-213	seurat_exp_0
Gng7	1.65615e-212	2.0712	1	0.652	3.02579e-208	seurat_exp_0
Nexn	4.33205e-210	1.2304	0.749	0.109	7.91466e-206	seurat_exp_0
Arpp21	2.96911e-209	1.77781	1	0.988	5.42456e-205	seurat_exp_0
Rarb	4.34785e-206	1.40573	0.851	0.182	7.94352e-202	seurat_exp_0
Hpca	1.35914e-205	1.82547	1	0.962	2.48314e-201	seurat_exp_0
Kcnab1	1.31701e-203	1.92584	1	0.685	2.40618e-199	seurat_exp_0
Ptpn5	1.58774e-202	1.67775	1	0.94	2.9008e-198	seurat_exp_0
Spock3	5.17433e-200	1.76114	1	0.806	9.45351e-196	seurat_exp_0
St8sia3	6.56518e-200	1.69466	0.998	0.882	1.19946e-195	seurat_exp_0
Penk	2.27764e-199	2.58253	1	0.842	4.16125e-195	seurat_exp_0
Rxrg	2.41827e-197	1.6399	0.917	0.275	4.41817e-193	seurat_exp_0
Tmem158	1.20278e-194	1.75318	1	0.912	2.19749e-190	seurat_exp_0
Pcp4	4.33399e-193	1.65112	1	0.995	7.9182e-189	seurat_exp_0
Ppp3ca	2.43974e-191	1.32371	1	0.999	4.4574e-187	seurat_exp_0
Dmkn	1.22615e-185	1.204	0.73	0.128	2.24018e-181	seurat_exp_0
Dach1	1.52871e-185	1.20671	0.742	0.135	2.79295e-181	seurat_exp_0
Gnas	2.35272e-184	-1.17603	1	1	4.29843e-180	seurat_exp_0
Tac1	2.31871e-181	1.89039	1	0.648	4.23628e-177	seurat_exp_0
Rap1gap	8.63999e-181	1.2905	1	0.963	1.57853e-176	seurat_exp_0
Serpina9	2.41071e-179	1.05631	0.652	0.091	4.40437e-175	seurat_exp_0
Gnal	6.30326e-177	1.46924	1	0.845	1.15161e-172	seurat_exp_0
Inf2	8.19044e-177	1.39771	1	0.894	1.49639e-172	seurat_exp_0
Ngef	1.38227e-175	1.22309	1	0.974	2.52541e-171	seurat_exp_0
Rasgrp2	2.19996e-174	1.58663	0.976	0.568	4.01932e-170	seurat_exp_0
Olfm1	7.59781e-165	-2.04123	0.991	1	1.38812e-160	seurat_exp_0
Arpp19	3.64342e-164	1.11096	1	0.989	6.65653e-160	seurat_exp_0
Elmod1	7.11996e-164	1.15394	1	0.978	1.30082e-159	seurat_exp_0
Dgkb	1.56599e-163	1.31466	0.993	0.843	2.86106e-159	seurat_exp_0
Ano3	1.7117e-163	1.45967	0.991	0.777	3.12728e-159	seurat_exp_0
Tesc	2.88587e-160	1.29202	0.991	0.878	5.27248e-156	seurat_exp_0
Atp2b1	1.29914e-159	1.07956	1	0.996	2.37353e-155	seurat_exp_0
Foxp1	1.24971e-158	1.41812	0.962	0.603	2.28322e-154	seurat_exp_0
Strn	3.41101e-158	1.38737	0.964	0.593	6.23191e-154	seurat_exp_0
Pde2a	9.29071e-157	1.04297	1	0.983	1.69741e-152	seurat_exp_0
Stmn1	1.58309e-154	-1.41552	0.998	0.999	2.89231e-150	seurat_exp_0
Six3	2.6141e-154	1.03363	0.794	0.176	4.77596e-150	seurat_exp_0
Baiap2	2.92974e-153	1.02085	1	0.988	5.35263e-149	seurat_exp_0
Necab2	1.72949e-152	1.29823	0.991	0.723	3.15978e-148	seurat_exp_0
Bcl11b	1.80198e-152	1.27708	0.986	0.725	3.29222e-148	seurat_exp_0
Rem2	2.22127e-151	1.11639	0.784	0.205	4.05826e-147	seurat_exp_0
Kcnip2	2.11484e-147	1.23292	0.998	0.909	3.86382e-143	seurat_exp_0
Sez6	9.73784e-147	1.17323	1	0.959	1.7791e-142	seurat_exp_0
Cacna2d3	2.08631e-145	1.24195	0.981	0.683	3.81169e-141	seurat_exp_0
Ppp1r9a	2.24065e-143	1.02199	0.998	0.953	4.09367e-139	seurat_exp_0
Ablim2	9.52168e-141	1.18005	0.991	0.85	1.73961e-136	seurat_exp_0
Slc35d3	1.79366e-138	1.03513	0.709	0.161	3.27702e-134	seurat_exp_0
Phactr1	3.82903e-138	1.02101	1	0.958	6.99563e-134	seurat_exp_0
Dbp	5.79148e-136	1.04323	1	0.926	1.0581e-131	seurat_exp_0
Tgfa	7.40256e-133	1.19846	0.924	0.429	1.35245e-128	seurat_exp_0
Foxo1	3.02996e-132	1.17973	0.829	0.306	5.53574e-128	seurat_exp_0
Lingo3	2.23292e-131	1.24682	0.879	0.437	4.07954e-127	seurat_exp_0
Tomm70a	1.68099e-130	1.00546	0.998	0.945	3.07116e-126	seurat_exp_0
Gnb5	2.15676e-129	1.01353	1	0.975	3.9404e-125	seurat_exp_0
Basp1	1.95548e-128	-1.17474	1	0.997	3.57266e-124	seurat_exp_0
Actn2	1.26315e-127	1.16174	0.813	0.293	2.30777e-123	seurat_exp_0
Smpd3	5.7613e-126	1.26669	0.922	0.613	1.05259e-121	seurat_exp_0
Bcr	2.43648e-125	1.03851	0.983	0.78	4.45144e-121	seurat_exp_0
Dlgap1	5.9952e-125	-1.26933	0.799	0.98	1.09532e-120	seurat_exp_0
Rgs4	1.52102e-124	1.08373	1	0.951	2.77891e-120	seurat_exp_0
Coch	3.28804e-123	1.17586	0.853	0.349	6.00725e-119	seurat_exp_0
Vsnl1	9.74562e-121	-1.49105	0.972	0.986	1.78053e-116	seurat_exp_0
Ncald	8.90328e-120	-1.34304	0.822	0.97	1.62663e-115	seurat_exp_0
Cpne5	1.7667e-119	1.04543	0.979	0.782	3.22776e-115	seurat_exp_0
Lzts3	5.08937e-118	1.02023	0.995	0.828	9.29828e-114	seurat_exp_0
Serpini1	1.12508e-117	-1.28418	0.827	0.982	2.05553e-113	seurat_exp_0
Id4	2.30706e-116	1.07749	0.983	0.776	4.215e-112	seurat_exp_0
Shank1	1.31907e-115	-1.23024	0.412	0.889	2.40994e-111	seurat_exp_0
Nrn1	3.40838e-115	-1.80044	0.37	0.856	6.22712e-111	seurat_exp_0
Slc17a7	3.60724e-111	-2.1167	0.908	0.933	6.59043e-107	seurat_exp_0
Camk2n2	4.87756e-111	-1.14986	0.765	0.966	8.91131e-107	seurat_exp_0
Sncb	6.44799e-111	-1.00069	1	0.997	1.17805e-106	seurat_exp_0
Cck	7.85332e-111	-2.20392	0.96	0.968	1.4348e-106	seurat_exp_0
Tbc1d8	2.62129e-110	1.09192	0.777	0.311	4.78909e-106	seurat_exp_0
Strip2	1.31663e-108	1.01543	0.891	0.45	2.40549e-104	seurat_exp_0
Caln1	4.90694e-108	1.04024	0.922	0.613	8.96499e-104	seurat_exp_0
Slc8a1	7.7739e-105	-1.15618	0.467	0.905	1.42029e-100	seurat_exp_0
Ube2ql1	2.07358e-104	-1.07081	0.853	0.978	3.78843e-100	seurat_exp_0
Efhd2	3.99612e-101	-1.22285	0.808	0.963	7.3009e-97	seurat_exp_0
Ppm1e	4.76718e-98	-1.24867	0.564	0.915	8.70964e-94	seurat_exp_0
Syt13	5.59663e-97	-1.16512	0.616	0.923	1.0225e-92	seurat_exp_0
Nptxr	1.9153e-96	-1.62192	0.865	0.966	3.49925e-92	seurat_exp_0
Sez6l	9.99946e-96	-1.02851	0.462	0.889	1.8269e-91	seurat_exp_0
Car10	2.23439e-95	-1.1637	0.178	0.724	4.08223e-91	seurat_exp_0
Cnr1	1.71362e-93	1.02537	0.962	0.796	3.13079e-89	seurat_exp_0
Slc30a3	5.77506e-93	-1.57859	0.175	0.711	1.0551e-88	seurat_exp_0
Calb1	1.14133e-91	1.08519	0.969	0.746	2.08521e-87	seurat_exp_0
B3gnt2	2.43412e-90	1.01245	0.78	0.363	4.44714e-86	seurat_exp_0
Gpr155	7.51825e-90	1.12109	0.846	0.524	1.37358e-85	seurat_exp_0
Necab3	1.77263e-89	-1.11591	0.282	0.773	3.23859e-85	seurat_exp_0
Gprin1	3.64621e-83	-1.04563	0.45	0.854	6.66162e-79	seurat_exp_0
Rtn4r	1.05675e-81	-1.20611	0.194	0.686	1.93069e-77	seurat_exp_0
Elavl4	5.31352e-80	-1.00316	0.254	0.742	9.7078e-76	seurat_exp_0
Tbr1	1.20053e-78	-1.29473	0.211	0.689	2.19336e-74	seurat_exp_0
Nptx1	1.24546e-77	-1.25707	0.507	0.854	2.27546e-73	seurat_exp_0
Mef2c	5.62612e-77	-1.07275	0.896	0.963	1.02789e-72	seurat_exp_0
Stx1a	2.59628e-73	-1.27869	0.725	0.906	4.7434e-69	seurat_exp_0
Rasgrf2	4.02921e-71	-1.07516	0.334	0.755	7.36137e-67	seurat_exp_0
Cpne6	1.16962e-67	-1.2593	0.621	0.908	2.1369e-63	seurat_exp_0
Pde1a	6.48169e-65	-1.03797	0.462	0.809	1.18421e-60	seurat_exp_0
Ccn3	3.82358e-63	-1.12285	0.142	0.585	6.98567e-59	seurat_exp_0
Vxn	7.45032e-62	-1.5548	0.507	0.798	1.36117e-57	seurat_exp_0
Nrip3	3.00648e-61	-1.14699	0.441	0.806	5.49283e-57	seurat_exp_0
Gng4	4.3981e-56	-1.56974	0.374	0.734	8.03534e-52	seurat_exp_0
Mical2	2.40545e-54	-1.02998	0.54	0.802	4.39475e-50	seurat_exp_0
Lingo1	6.07454e-54	-1.08467	0.893	0.93	1.10982e-49	seurat_exp_0
Rprm	1.79929e-48	-1.05815	0.275	0.641	3.28731e-44	seurat_exp_0
Calb2	8.98423e-47	-1.85007	0.235	0.584	1.64142e-42	seurat_exp_0
Vip	4.25262e-43	-1.04061	0.078	0.43	7.76954e-39	seurat_exp_0
Fabp7	6.25462e-39	-1.60283	0.562	0.803	1.14272e-34	seurat_exp_0
Slc6a11	4.52169e-35	-1.05668	0.562	0.785	8.26112e-31	seurat_exp_0
Doc2g	3.76909e-31	-1.47741	0.147	0.428	6.88614e-27	seurat_exp_0
Cdhr1	3.68957e-23	-1.22053	0.142	0.369	6.74084e-19	seurat_exp_0
S100a5	4.91433e-13	-1.51667	0.052	0.192	8.97847e-09	seurat_exp_0
Vxn	1.71313e-148	1.93938	1	0.722	3.12989e-144	seurat_exp_1
Nxph3	1.08618e-146	1.21798	0.75	0.139	1.98446e-142	seurat_exp_1
Trbc2	2.47548e-129	1.502	0.846	0.236	4.52269e-125	seurat_exp_1
Ighm	1.23681e-125	1.69443	0.825	0.252	2.25966e-121	seurat_exp_1
Tbr1	5.18141e-122	1.46464	0.983	0.569	9.46643e-118	seurat_exp_1
Ttc9b	3.35469e-119	1.24471	1	0.981	6.12902e-115	seurat_exp_1
Efhd2	4.29565e-119	1.27218	1	0.931	7.84815e-115	seurat_exp_1
Diras2	7.72529e-116	1.12679	1	0.946	1.41141e-111	seurat_exp_1
Nptx1	1.64647e-115	1.51841	0.986	0.777	3.00809e-111	seurat_exp_1
Pde1a	1.33469e-103	1.1913	1	0.725	2.43849e-99	seurat_exp_1
Ncald	8.82046e-103	1.10858	0.997	0.941	1.6115e-98	seurat_exp_1
Fxyd7	2.25327e-101	1.08701	1	0.935	4.11672e-97	seurat_exp_1
Hs3st2	4.32537e-100	1.22113	0.942	0.444	7.90245e-96	seurat_exp_1
Myl4	2.23517e-98	1.26894	0.887	0.347	4.08365e-94	seurat_exp_1
Slc17a7	1.67178e-97	1.08084	1	0.921	3.05434e-93	seurat_exp_1
Igsf21	7.37903e-94	1.13194	0.938	0.529	1.34815e-89	seurat_exp_1
Nr4a2	3.29762e-90	1.47548	0.623	0.157	6.02476e-86	seurat_exp_1
Rasl10a	3.64711e-87	1.09148	0.949	0.549	6.66328e-83	seurat_exp_1
Dkk3	4.61751e-86	1.13974	0.986	0.739	8.43618e-82	seurat_exp_1
Adcy1	2.04787e-84	1.13037	0.99	0.881	3.74147e-80	seurat_exp_1
Tmem178	2.09678e-84	1.04693	0.945	0.545	3.83082e-80	seurat_exp_1
Rprm	6.20504e-77	1.40866	0.911	0.544	1.13366e-72	seurat_exp_1
Cck	9.70079e-71	1.0202	1	0.963	1.77233e-66	seurat_exp_1
Gad1	5.08842e-49	-1.23422	0.938	0.978	9.29655e-45	seurat_exp_1
Meis2	3.40432e-48	-1.2565	0.678	0.888	6.2197e-44	seurat_exp_1
Gad2	4.46512e-48	-1.19592	0.716	0.901	8.15777e-44	seurat_exp_1
Cplx3	2.36179e-46	1.30337	0.521	0.186	4.31499e-42	seurat_exp_1
Wfs1	1.25225e-45	-1.15294	0.421	0.774	2.28786e-41	seurat_exp_1
Slc32a1	7.44556e-44	-1.07123	0.774	0.914	1.3603e-39	seurat_exp_1
Pcp4l1	6.23121e-43	-1.55864	0.846	0.909	1.13844e-38	seurat_exp_1
Ccn2	1.27335e-41	1.68819	0.592	0.257	2.32641e-37	seurat_exp_1
Penk	5.11016e-41	-2.49323	0.736	0.883	9.33626e-37	seurat_exp_1
Pbx3	3.88958e-40	-1.14953	0.195	0.58	7.10627e-36	seurat_exp_1
Necab2	9.68507e-37	-1.08721	0.527	0.794	1.76946e-32	seurat_exp_1
Gpr88	2.79139e-36	-2.21134	0.452	0.769	5.09986e-32	seurat_exp_1
Zcchc12	3.97676e-36	-1.00148	0.39	0.734	7.26553e-32	seurat_exp_1
Spock3	1.56665e-34	-1.07825	0.647	0.86	2.86227e-30	seurat_exp_1
Hap1	7.40276e-34	-1.19124	0.548	0.804	1.35248e-29	seurat_exp_1
Calb1	1.67373e-29	-1.0277	0.592	0.804	3.05791e-25	seurat_exp_1
Gng7	1.13233e-23	-1.21838	0.517	0.73	2.06878e-19	seurat_exp_1
Gpsm1	2.64923e-22	-1.04105	0.5	0.727	4.84014e-18	seurat_exp_1
Rasd2	5.97203e-22	-1.25372	0.733	0.836	1.09109e-17	seurat_exp_1
Calb2	1.40498e-18	-1.55474	0.322	0.554	2.5669e-14	seurat_exp_1
Adora2a	6.17667e-18	-1.21754	0.185	0.41	1.12848e-13	seurat_exp_1
Tac1	1.19648e-17	-1.55709	0.545	0.722	2.18598e-13	seurat_exp_1
Syndig1l	4.22364e-17	-1.02444	0.233	0.449	7.71659e-13	seurat_exp_1
Pde10a	9.1832e-16	-1.6114	0.664	0.788	1.67777e-11	seurat_exp_1
Fabp7	9.99445e-16	-1.40516	0.634	0.782	1.82599e-11	seurat_exp_1
Ptgds	1.91586e-14	-1.54523	0.993	0.99	3.50027e-10	seurat_exp_1
Apod	3.5288e-14	-1.22913	0.788	0.864	6.44711e-10	seurat_exp_1
Rgs9	1.43916e-13	-1.44345	0.435	0.586	2.62935e-09	seurat_exp_1
Adcy5	1.5003e-13	-1.17731	0.853	0.871	2.74106e-09	seurat_exp_1
Pde1b	1.69512e-13	-1.21823	0.925	0.958	3.09699e-09	seurat_exp_1
Drd2	2.08508e-13	-1.01423	0.164	0.345	3.80944e-09	seurat_exp_1
Enpp2	6.25897e-12	-1.23034	0.89	0.899	1.14351e-07	seurat_exp_1
Gng4	2.22417e-08	-1.09618	0.606	0.687	0.000406355	seurat_exp_1
Cdhr1	3.93642e-07	-1.0269	0.233	0.346	0.00719183	seurat_exp_1
Doc2g	2.49621e-06	-1.17347	0.295	0.395	0.0456057	seurat_exp_1
Plp1	1.28679e-155	2.8264	1	0.974	2.35096e-151	seurat_exp_2
Trf	9.0116e-151	2.45969	1	0.874	1.64642e-146	seurat_exp_2
Mbp	4.64963e-150	2.35927	1	1	8.49488e-146	seurat_exp_2
Cnp	1.48913e-149	2.33704	1	0.912	2.72063e-145	seurat_exp_2
Mobp	9.0328e-148	2.53956	1	0.923	1.65029e-143	seurat_exp_2
Qdpr	9.03847e-147	2.01384	1	0.96	1.65133e-142	seurat_exp_2
Scd2	6.23623e-144	1.24274	1	1	1.13936e-139	seurat_exp_2
Mal	7.75815e-144	2.44091	1	0.824	1.41741e-139	seurat_exp_2
Mag	1.83078e-143	2.3451	1	0.795	3.34484e-139	seurat_exp_2
Plekhb1	5.45316e-143	2.10381	1	0.909	9.96292e-139	seurat_exp_2
Fth1	1.09174e-135	1.35687	1	1	1.99461e-131	seurat_exp_2
Cldn11	2.93656e-134	2.27798	1	0.734	5.36509e-130	seurat_exp_2
Cryab	4.85684e-134	2.01564	1	0.893	8.87345e-130	seurat_exp_2
Car2	4.99305e-133	1.90283	1	0.955	9.1223e-129	seurat_exp_2
Tspan2	7.34696e-133	2.05936	1	0.679	1.34229e-128	seurat_exp_2
Csrp1	3.60612e-127	1.70441	1	0.916	6.58838e-123	seurat_exp_2
Mog	6.78197e-125	2.09617	0.996	0.623	1.23907e-120	seurat_exp_2
Sept4	2.84606e-124	1.78914	1	0.914	5.19975e-120	seurat_exp_2
Bcas1	5.65866e-124	1.93296	1	0.727	1.03384e-119	seurat_exp_2
Cd81	3.39371e-120	1.11649	1	0.999	6.2003e-116	seurat_exp_2
Ermn	2.24123e-118	1.82409	0.919	0.431	4.09473e-114	seurat_exp_2
Qk	1.84433e-116	1.44087	1	0.959	3.36958e-112	seurat_exp_2
Ndrg1	1.04645e-111	1.79735	0.986	0.65	1.91187e-107	seurat_exp_2
Gatm	1.97976e-110	1.74292	0.989	0.692	3.61702e-106	seurat_exp_2
Apod	3.86215e-110	1.69716	1	0.839	7.05615e-106	seurat_exp_2
Gpr37	1.40774e-108	1.72918	0.954	0.525	2.57194e-104	seurat_exp_2
Olig1	3.32874e-108	1.60838	1	0.859	6.08161e-104	seurat_exp_2
Calm2	3.00192e-107	-1.00018	1	1	5.4845e-103	seurat_exp_2
Tubb4a	9.57478e-106	1.13224	1	0.998	1.74931e-101	seurat_exp_2
Pllp	1.1896e-105	1.65092	0.989	0.628	2.17339e-101	seurat_exp_2
Tmem88b	3.95147e-105	1.65205	0.912	0.448	7.21934e-101	seurat_exp_2
Ppp1r14a	4.96383e-102	1.78003	0.923	0.504	9.06891e-98	seurat_exp_2
Dbndd2	1.86134e-101	1.49833	1	0.958	3.40067e-97	seurat_exp_2
Opalin	4.12219e-100	1.6364	0.898	0.448	7.53124e-96	seurat_exp_2
Ugt8a	3.33562e-99	1.78888	0.901	0.454	6.09418e-95	seurat_exp_2
Fa2h	5.23481e-97	1.64417	0.859	0.42	9.564e-93	seurat_exp_2
Tsc22d4	5.7989e-94	1.19287	1	0.937	1.05946e-89	seurat_exp_2
Sirt2	8.34088e-89	1.19579	1	0.941	1.52388e-84	seurat_exp_2
Slc44a1	7.63997e-88	1.41881	0.972	0.639	1.39582e-83	seurat_exp_2
Grb14	1.51076e-87	1.52598	0.961	0.621	2.76015e-83	seurat_exp_2
Ptma	2.27935e-87	1.01914	1	1	4.16438e-83	seurat_exp_2
Pacs2	3.34542e-87	1.3812	0.993	0.812	6.11208e-83	seurat_exp_2
Gsn	5.00736e-87	1.51266	0.975	0.648	9.14844e-83	seurat_exp_2
Rnf13	9.96482e-87	1.32334	0.996	0.832	1.82057e-82	seurat_exp_2
Cmtm5	3.84047e-82	1.31667	0.989	0.712	7.01654e-78	seurat_exp_2
Kif5b	1.14747e-80	1.069	1	0.912	2.09643e-76	seurat_exp_2
Desi1	1.04033e-78	1.16841	1	0.893	1.90068e-74	seurat_exp_2
Selenop	1.32724e-78	1.00981	1	0.957	2.42487e-74	seurat_exp_2
Gfap	1.30083e-76	1.43022	0.866	0.43	2.37662e-72	seurat_exp_2
Gna12	1.27748e-74	1.34753	0.982	0.744	2.33395e-70	seurat_exp_2
Prr18	1.5709e-73	1.29323	0.782	0.405	2.87003e-69	seurat_exp_2
Evi2a	9.16649e-73	1.43172	0.768	0.404	1.67472e-68	seurat_exp_2
Gng11	4.36503e-71	1.28613	0.944	0.614	7.97492e-67	seurat_exp_2
Nrgn	1.97675e-70	-1.59646	1	0.998	3.61152e-66	seurat_exp_2
Phldb1	3.31877e-70	1.21418	0.979	0.671	6.0634e-66	seurat_exp_2
Lgi3	3.71516e-69	1.07991	0.996	0.861	6.7876e-65	seurat_exp_2
Cers2	4.64019e-68	1.2324	0.908	0.588	8.47762e-64	seurat_exp_2
Scd1	2.78632e-67	1.18906	0.986	0.772	5.09061e-63	seurat_exp_2
Plaat3	3.30415e-66	1.11389	0.944	0.624	6.03669e-62	seurat_exp_2
Cd9	3.72238e-66	1.20177	0.968	0.679	6.8008e-62	seurat_exp_2
Gltp	1.02187e-65	1.31084	0.806	0.485	1.86696e-61	seurat_exp_2
Slain1	5.69586e-65	1.23185	0.901	0.607	1.04063e-60	seurat_exp_2
Nkx6-2	7.96854e-65	1.29702	0.655	0.289	1.45585e-60	seurat_exp_2
Neat1	1.05001e-64	1.20381	0.873	0.507	1.91837e-60	seurat_exp_2
Clic4	1.70819e-64	1.11956	0.923	0.574	3.12086e-60	seurat_exp_2
Josd2	5.47041e-61	1.09654	0.979	0.803	9.99444e-57	seurat_exp_2
Pdlim2	7.07325e-61	1.31811	0.718	0.376	1.29228e-56	seurat_exp_2
Fnbp1	1.14344e-60	1.09607	0.923	0.623	2.08907e-56	seurat_exp_2
Slc12a2	2.86043e-60	1.15943	0.873	0.555	5.22601e-56	seurat_exp_2
Rhog	5.39057e-57	1.3482	0.701	0.394	9.84857e-53	seurat_exp_2
Gjc3	1.06334e-56	1.23582	0.662	0.343	1.94271e-52	seurat_exp_2
Psat1	1.93149e-56	1.09958	0.982	0.749	3.52884e-52	seurat_exp_2
Aspa	2.36452e-55	1.25799	0.655	0.33	4.31998e-51	seurat_exp_2
Efnb3	1.02736e-54	1.00299	0.972	0.689	1.87698e-50	seurat_exp_2
Carhsp1	7.64734e-52	1.08161	0.817	0.492	1.39717e-47	seurat_exp_2
Myrf	7.46279e-51	1.24227	0.63	0.324	1.36345e-46	seurat_exp_2
Erbin	2.85318e-49	1.02799	0.866	0.591	5.21276e-45	seurat_exp_2
Anln	4.77272e-49	1.01519	0.532	0.202	8.71976e-45	seurat_exp_2
2810468N07Rik	6.5908e-48	1.05531	0.849	0.558	1.20414e-43	seurat_exp_2
Plekhh1	2.04153e-46	1.0835	0.574	0.263	3.72988e-42	seurat_exp_2
Litaf	6.11954e-46	1.10931	0.697	0.416	1.11804e-41	seurat_exp_2
Sparc	7.88649e-46	1.42665	1	0.948	1.44086e-41	seurat_exp_2
Tmem63a	2.88532e-45	1.1134	0.62	0.322	5.27149e-41	seurat_exp_2
Gjc2	4.23119e-45	1.08357	0.592	0.282	7.73038e-41	seurat_exp_2
Cntn2	3.47113e-44	1.01863	0.835	0.572	6.34176e-40	seurat_exp_2
Fgfr2	8.62878e-44	1.1081	0.75	0.477	1.57648e-39	seurat_exp_2
Ttyh2	2.94906e-42	1.11113	0.63	0.363	5.38793e-38	seurat_exp_2
Sox10	1.71641e-40	1.15701	0.623	0.372	3.13587e-36	seurat_exp_2
Lpar1	1.90901e-38	1.02444	0.613	0.356	3.48776e-34	seurat_exp_2
Agt	2.29273e-36	1.43269	0.549	0.283	4.18882e-32	seurat_exp_2
Tmbim1	6.65959e-35	1.04728	0.669	0.444	1.21671e-30	seurat_exp_2
Pcp4	3.74741e-22	-1.06121	1	0.995	6.84651e-18	seurat_exp_2
Slc17a7	6.22095e-22	-1.12931	0.986	0.922	1.13657e-17	seurat_exp_2
Cck	4.68703e-18	-1.14378	1	0.963	8.5632e-14	seurat_exp_2
Cdhr1	1.08979e-11	-1.08699	0.173	0.353	1.99105e-07	seurat_exp_2
S100a5	4.49181e-08	-1.35944	0.053	0.184	0.000820654	seurat_exp_2
Atp1a2	2.55333e-88	1.29137	1	0.996	4.66494e-84	seurat_exp_3
Myoc	1.51414e-87	1.34832	0.493	0.074	2.76633e-83	seurat_exp_3
Ptgds	1.18164e-86	3.15281	1	0.99	2.15886e-82	seurat_exp_3
Gm42418	4.23218e-68	1.35988	1	1	7.7322e-64	seurat_exp_3
Mgp	6.77183e-42	1.9902	0.751	0.481	1.23721e-37	seurat_exp_3
Igf2	4.2215e-40	1.35551	0.576	0.23	7.71269e-36	seurat_exp_3
Pcp4	8.98854e-38	-1.46101	1	0.996	1.64221e-33	seurat_exp_3
Fmod	3.34184e-36	1.03127	0.318	0.074	6.10554e-32	seurat_exp_3
Col1a2	1.14254e-31	1.07269	0.364	0.111	2.08741e-27	seurat_exp_3
Slc6a20a	4.15671e-28	1.00727	0.442	0.173	7.5943e-24	seurat_exp_3
Hpca	3.20285e-25	-1.28119	0.977	0.967	5.8516e-21	seurat_exp_3
Fn1	5.57379e-22	1.07933	0.645	0.434	1.01833e-17	seurat_exp_3
Lars2	2.96675e-16	1.24842	0.931	0.84	5.42024e-12	seurat_exp_3
Adora2a	5.0236e-12	-1.08608	0.189	0.403	9.17812e-08	seurat_exp_3
Sst	7.35915e-10	-1.09877	0.982	0.916	1.34452e-05	seurat_exp_3
Lamp5	7.72322e-116	1.8474	1	0.89	1.41103e-111	seurat_exp_4
Camk2n1	3.10168e-113	1.23475	1	1	5.66676e-109	seurat_exp_4
Mbp	2.41754e-108	-3.03	0.995	1	4.41684e-104	seurat_exp_4
Pcp4	2.77001e-107	-2.8255	0.962	0.999	5.0608e-103	seurat_exp_4
Atp1a1	3.03431e-102	1.18235	1	1	5.54369e-98	seurat_exp_4
Nrgn	3.00143e-101	1.3841	1	0.998	5.48362e-97	seurat_exp_4
Rasgrf2	3.35924e-99	1.48089	0.99	0.663	6.13733e-95	seurat_exp_4
Camk2a	3.47768e-99	1.21361	1	0.996	6.35372e-95	seurat_exp_4
Plp1	2.2507e-89	-3.41607	0.842	0.988	4.11202e-85	seurat_exp_4
Mobp	1.4368e-88	-3.05079	0.622	0.957	2.62503e-84	seurat_exp_4
Nptxr	3.12338e-87	1.33899	1	0.946	5.70642e-83	seurat_exp_4
Enc1	2.66135e-86	1.19279	1	0.936	4.86228e-82	seurat_exp_4
Cux2	6.485e-84	1.12396	0.923	0.361	1.18481e-79	seurat_exp_4
Mef2c	7.36658e-76	1.06564	1	0.949	1.34587e-71	seurat_exp_4
Cck	2.27174e-75	1.22766	1	0.964	4.15048e-71	seurat_exp_4
Calb1	1.3456e-74	1.22918	1	0.763	2.45842e-70	seurat_exp_4
Epop	1.31233e-73	1.1291	0.971	0.554	2.39763e-69	seurat_exp_4
Slc30a3	1.09209e-72	1.17592	0.99	0.596	1.99525e-68	seurat_exp_4
Itpka	8.55421e-72	1.03247	1	0.888	1.56285e-67	seurat_exp_4
Cacng3	8.6052e-71	1.00005	0.995	0.869	1.57217e-66	seurat_exp_4
Lingo1	1.81963e-67	1.04152	1	0.918	3.32446e-63	seurat_exp_4
Rilpl1	9.56214e-66	1.03636	0.952	0.647	1.747e-61	seurat_exp_4
Mag	7.08003e-61	-2.05876	0.388	0.852	1.29352e-56	seurat_exp_4
Igfbp6	1.12294e-60	1.06043	0.976	0.704	2.05161e-56	seurat_exp_4
Trf	3.74985e-60	-2.17313	0.608	0.911	6.85098e-56	seurat_exp_4
Mal	2.32657e-59	-2.21725	0.474	0.874	4.25065e-55	seurat_exp_4
Cnp	2.7097e-58	-1.92109	0.737	0.936	4.95062e-54	seurat_exp_4
Vip	3.9132e-58	1.24442	0.818	0.338	7.14942e-54	seurat_exp_4
Qdpr	9.14685e-55	-1.49849	0.837	0.975	1.67113e-50	seurat_exp_4
Cldn11	6.04207e-53	-1.89067	0.344	0.797	1.10389e-48	seurat_exp_4
Bcl11b	4.73653e-50	-1.19992	0.321	0.804	8.65364e-46	seurat_exp_4
Plekhb1	9.05173e-50	-1.6151	0.775	0.93	1.65375e-45	seurat_exp_4
Bcas1	3.68141e-47	-1.49433	0.34	0.79	6.72593e-43	seurat_exp_4
Nrsn2	5.25114e-47	-1.12992	0.617	0.922	9.59384e-43	seurat_exp_4
Pcp4l1	5.34737e-47	-1.83276	0.713	0.918	9.76964e-43	seurat_exp_4
Sez6	5.482e-44	-1.19014	0.861	0.974	1.00156e-39	seurat_exp_4
Efnb3	1.04087e-43	-1.19178	0.316	0.752	1.90168e-39	seurat_exp_4
Cryab	6.77252e-43	-1.52584	0.813	0.912	1.23734e-38	seurat_exp_4
Tspan2	1.31479e-42	-1.49978	0.316	0.746	2.40212e-38	seurat_exp_4
Mog	5.4499e-41	-1.50194	0.254	0.697	9.95697e-37	seurat_exp_4
Tac1	5.58378e-38	-2.11724	0.325	0.735	1.02016e-33	seurat_exp_4
Sept4	2.14068e-36	-1.15252	0.804	0.933	3.91102e-32	seurat_exp_4
Apod	1.3032e-35	-1.7796	0.656	0.872	2.38095e-31	seurat_exp_4
Nnat	9.96371e-35	-1.48578	0.522	0.817	1.82037e-30	seurat_exp_4
Slc32a1	3.34679e-34	-1.10553	0.742	0.912	6.11459e-30	seurat_exp_4
Rgs9	3.77176e-34	-1.8722	0.167	0.603	6.89101e-30	seurat_exp_4
Spock3	2.77807e-33	-1.18941	0.598	0.857	5.07553e-29	seurat_exp_4
Gad1	3.10369e-33	-1.19704	0.952	0.976	5.67045e-29	seurat_exp_4
Adcy5	1.4937e-32	-1.58335	0.679	0.885	2.729e-28	seurat_exp_4
Penk	1.7095e-32	-2.65318	0.775	0.875	3.12325e-28	seurat_exp_4
Pllp	1.58123e-31	-1.06931	0.306	0.696	2.8889e-27	seurat_exp_4
Gsn	3.06446e-31	-1.15321	0.359	0.71	5.59876e-27	seurat_exp_4
Syt6	3.14298e-31	-1.00244	0.11	0.53	5.74223e-27	seurat_exp_4
Car2	5.58238e-31	-1.13787	0.885	0.966	1.0199e-26	seurat_exp_4
Kcnab1	1.79486e-30	-1.2567	0.435	0.759	3.27922e-26	seurat_exp_4
Ndrg1	1.1313e-29	-1.13627	0.373	0.711	2.06688e-25	seurat_exp_4
Opalin	1.64146e-29	-1.0655	0.124	0.527	2.99894e-25	seurat_exp_4
Rasgrp2	2.50964e-29	-1.04895	0.301	0.659	4.5851e-25	seurat_exp_4
Olig1	2.9308e-29	-1.00902	0.708	0.887	5.35456e-25	seurat_exp_4
Ermn	1.25635e-28	-1.07989	0.115	0.513	2.29535e-24	seurat_exp_4
Tmem88b	1.61407e-28	-1.02095	0.134	0.528	2.94891e-24	seurat_exp_4
Syndig1l	1.00594e-27	-1.29437	0.067	0.456	1.83785e-23	seurat_exp_4
Gad2	1.3534e-27	-1.04079	0.766	0.891	2.47267e-23	seurat_exp_4
Pbx3	1.40829e-27	-1.09995	0.191	0.567	2.57295e-23	seurat_exp_4
Gpr37	1.41774e-27	-1.04112	0.239	0.598	2.5902e-23	seurat_exp_4
Ugt8a	1.83387e-27	-1.07019	0.144	0.531	3.35048e-23	seurat_exp_4
Ppp1r14a	3.15595e-27	-1.06533	0.211	0.577	5.76592e-23	seurat_exp_4
Drd1	8.76904e-26	-1.20923	0.043	0.418	1.6021e-21	seurat_exp_4
Gatm	1.53604e-25	-1.01444	0.45	0.747	2.80634e-21	seurat_exp_4
Gng7	2.11862e-24	-1.34821	0.469	0.726	3.87072e-20	seurat_exp_4
Pde1b	2.23046e-21	-1.43407	0.933	0.956	4.07505e-17	seurat_exp_4
Scn4b	2.87352e-21	-1.59034	0.397	0.673	5.24991e-17	seurat_exp_4
Adora2a	1.29685e-18	-1.31706	0.12	0.408	2.36935e-14	seurat_exp_4
Ppp1r1b	1.14092e-17	-2.03268	0.885	0.898	2.08447e-13	seurat_exp_4
Drd2	1.16616e-17	-1.13835	0.067	0.347	2.13058e-13	seurat_exp_4
Hbb-bs	2.33149e-17	-1.19114	1	1	4.25964e-13	seurat_exp_4
Lrrc10b	9.67828e-15	-1.06818	0.129	0.372	1.76822e-10	seurat_exp_4
Pde10a	1.6438e-14	-1.72241	0.641	0.786	3.00322e-10	seurat_exp_4
Ttr	7.24758e-14	-4.47435	0.847	0.896	1.32413e-09	seurat_exp_4
Hbb-bt	8.92129e-14	-1.16628	0.995	0.975	1.62992e-09	seurat_exp_4
Hba-a2	2.93178e-13	-1.23113	1	0.99	5.35637e-09	seurat_exp_4
Hba-a1	8.01143e-11	-1.23787	1	0.988	1.46369e-06	seurat_exp_4
Gng4	5.3602e-10	-1.07542	0.517	0.691	9.79309e-06	seurat_exp_4
Rasd2	2.51097e-07	-1.01419	0.766	0.83	0.00458754	seurat_exp_4
Eomes	2.47793e-217	2.04986	0.807	0.078	4.52718e-213	seurat_exp_5
Ms4a15	2.27418e-172	1.79408	0.734	0.081	4.15492e-168	seurat_exp_5
Th	5.2074e-168	2.35495	0.932	0.182	9.51392e-164	seurat_exp_5
Cdhr1	7.72902e-160	3.05039	0.976	0.28	1.41209e-155	seurat_exp_5
Nmb	3.77777e-151	2.20009	0.889	0.195	6.90198e-147	seurat_exp_5
Omp	4.83611e-151	1.02221	0.372	0.01	8.83558e-147	seurat_exp_5
S100a5	5.56105e-151	4.06759	0.768	0.12	1.016e-146	seurat_exp_5
Doc2g	1.10835e-150	3.31079	0.981	0.334	2.02495e-146	seurat_exp_5
Islr	3.32266e-139	1.77217	0.855	0.174	6.07049e-135	seurat_exp_5
Ly6g6e	2.48735e-138	1.52575	0.628	0.072	4.54438e-134	seurat_exp_5
Calb2	9.43608e-134	3.14567	1	0.49	1.72397e-129	seurat_exp_5
Shisa3	8.96948e-126	1.3951	0.556	0.059	1.63872e-121	seurat_exp_5
Trh	2.97971e-125	1.83765	0.749	0.139	5.44393e-121	seurat_exp_5
Fabp7	1.69876e-116	3.42576	1	0.746	3.10364e-112	seurat_exp_5
Sp8	5.30428e-116	1.18853	0.744	0.128	9.69093e-112	seurat_exp_5
Slc6a11	9.03232e-114	2.15313	1	0.73	1.65021e-109	seurat_exp_5
Shisa8	1.29613e-104	1.37842	0.903	0.26	2.36803e-100	seurat_exp_5
Cbln1	5.13761e-103	1.25773	0.643	0.114	9.38641e-99	seurat_exp_5
Cacng5	3.82602e-101	1.43153	0.855	0.25	6.99013e-97	seurat_exp_5
Fth1	8.22014e-101	-1.21323	1	1	1.50182e-96	seurat_exp_5
Csdc2	1.91989e-97	1.44401	1	0.838	3.50764e-93	seurat_exp_5
Igf1	3.90589e-97	1.08013	0.604	0.102	7.13606e-93	seurat_exp_5
Ppp3ca	4.99583e-97	-1.75498	0.986	1	9.12738e-93	seurat_exp_5
Nrgn	7.61881e-97	-2.39876	0.981	1	1.39196e-92	seurat_exp_5
Lgr5	1.49919e-96	1.01935	0.638	0.112	2.73901e-92	seurat_exp_5
Camk2n1	3.22976e-96	-1.59732	1	1	5.90077e-92	seurat_exp_5
Zic1	2.60988e-95	1.28901	0.816	0.221	4.76824e-91	seurat_exp_5
Dlx1	1.28894e-87	1.26977	0.816	0.245	2.35489e-83	seurat_exp_5
Pcbp3	3.91299e-86	1.38668	1	0.748	7.14903e-82	seurat_exp_5
Nrip3	5.36928e-86	1.54558	0.995	0.728	9.80967e-82	seurat_exp_5
Hpca	5.41347e-86	-2.33709	0.816	0.98	9.89041e-82	seurat_exp_5
Clca3a1	1.64049e-85	1.10997	0.237	0.009	2.99718e-81	seurat_exp_5
Lbhd2	1.81825e-85	1.57463	0.671	0.161	3.32195e-81	seurat_exp_5
Dbi	2.25309e-85	1.11344	1	0.999	4.1164e-81	seurat_exp_5
Slc38a3	5.66931e-85	1.33901	0.99	0.717	1.03578e-80	seurat_exp_5
Apoe	1.8053e-84	1.3129	1	1	3.29829e-80	seurat_exp_5
Gng4	2.47149e-84	1.3443	0.99	0.652	4.51541e-80	seurat_exp_5
Enc1	3.95872e-81	-1.79449	0.725	0.959	7.23257e-77	seurat_exp_5
Pla2g7	1.37783e-80	1.30186	1	0.905	2.5173e-76	seurat_exp_5
Reln	3.02304e-80	1.77183	0.952	0.619	5.52309e-76	seurat_exp_5
Igfbp2	1.93802e-79	1.3404	0.961	0.543	3.54075e-75	seurat_exp_5
Chn1	2.5497e-78	-1.46127	0.995	0.997	4.6583e-74	seurat_exp_5
Rcn2	4.47883e-78	1.2139	0.995	0.949	8.18282e-74	seurat_exp_5
Ppp3r1	1.47208e-77	-1.11862	0.995	1	2.68949e-73	seurat_exp_5
Lcat	2.36864e-76	1.39393	0.85	0.337	4.32751e-72	seurat_exp_5
Bc1	2.14299e-75	-1.41501	1	1	3.91524e-71	seurat_exp_5
Arpp19	7.23946e-75	-1.49234	0.966	0.993	1.32265e-70	seurat_exp_5
Enho	1.6459e-73	1.01715	1	0.908	3.00705e-69	seurat_exp_5
Inpp5j	2.76805e-73	1.23477	0.957	0.667	5.05723e-69	seurat_exp_5
Slc1a3	2.30732e-72	1.00357	1	0.992	4.21548e-68	seurat_exp_5
Ndnf	4.97608e-72	1.23163	0.729	0.217	9.09129e-68	seurat_exp_5
Iqsec3	3.93604e-70	1.16328	0.961	0.7	7.19115e-66	seurat_exp_5
Ngef	4.41454e-70	-1.42438	0.908	0.984	8.06537e-66	seurat_exp_5
Fbxl16	1.53271e-69	-1.07821	0.995	0.998	2.80026e-65	seurat_exp_5
Slc13a3	1.63973e-68	1.05513	0.71	0.212	2.99579e-64	seurat_exp_5
Cplx2	9.33242e-68	-1.20852	0.899	0.992	1.70503e-63	seurat_exp_5
Itpka	2.53294e-67	-1.43275	0.527	0.928	4.62767e-63	seurat_exp_5
Gpsm1	7.24858e-67	1.09981	0.961	0.681	1.32432e-62	seurat_exp_5
6430548M08Rik	1.61088e-66	1.09954	0.99	0.863	2.94307e-62	seurat_exp_5
Itpr1	1.05365e-65	-1.30174	0.889	0.963	1.92502e-61	seurat_exp_5
Mal2	3.25577e-65	-1.40398	0.449	0.878	5.94829e-61	seurat_exp_5
Ctxn1	4.20439e-65	-1.05438	1	0.998	7.68142e-61	seurat_exp_5
Slc4a4	1.95735e-63	1.26128	0.976	0.773	3.57607e-59	seurat_exp_5
Ptpro	3.45694e-63	1.13522	0.923	0.556	6.31583e-59	seurat_exp_5
Kcnj10	9.22004e-63	1.08679	0.99	0.852	1.6845e-58	seurat_exp_5
Rnf112	5.01326e-62	-1.20059	0.71	0.959	9.15923e-58	seurat_exp_5
Prune2	3.55148e-61	1.22475	0.918	0.698	6.48856e-57	seurat_exp_5
Rab3b	1.84456e-60	1.46582	0.976	0.792	3.37001e-56	seurat_exp_5
Selenop	3.95549e-60	1.17326	0.995	0.959	7.22669e-56	seurat_exp_5
Synpr	1.26536e-59	1.01764	1	0.875	2.31182e-55	seurat_exp_5
Prkcb	2.0681e-59	-1.06059	0.952	0.995	3.77843e-55	seurat_exp_5
Lhfp	5.21101e-59	1.13103	0.826	0.407	9.52051e-55	seurat_exp_5
Sst	1.07648e-58	-2.20598	0.749	0.936	1.96673e-54	seurat_exp_5
Nrsn1	1.75997e-57	1.13997	1	0.99	3.21547e-53	seurat_exp_5
Tmem163	1.5005e-55	1.19451	0.787	0.361	2.74141e-51	seurat_exp_5
Prkcg	9.99653e-55	-1.13847	0.773	0.953	1.82637e-50	seurat_exp_5
Marcksl1	1.81154e-54	1.09305	0.981	0.81	3.30969e-50	seurat_exp_5
Klhl2	3.0114e-54	-1.06411	0.763	0.959	5.50183e-50	seurat_exp_5
Jam2	3.8193e-54	1.03534	0.812	0.413	6.97787e-50	seurat_exp_5
Mmp17	1.37445e-53	-1.20366	0.522	0.89	2.51112e-49	seurat_exp_5
Snrk	3.62686e-53	1.10797	0.952	0.798	6.62627e-49	seurat_exp_5
Pacsin2	2.68964e-52	1.00279	0.942	0.685	4.91397e-48	seurat_exp_5
Nell2	1.18665e-51	-1.11046	0.768	0.961	2.16801e-47	seurat_exp_5
Adgrg1	1.03382e-50	1.08424	0.942	0.699	1.88879e-46	seurat_exp_5
Lrrc55	2.30417e-50	1.21394	0.691	0.289	4.20971e-46	seurat_exp_5
Phactr1	2.96611e-50	-1.05128	0.86	0.973	5.41908e-46	seurat_exp_5
Rgs4	3.54974e-49	-1.25799	0.908	0.963	6.48537e-45	seurat_exp_5
Igfbp5	1.69851e-48	1.10092	0.923	0.692	3.10317e-44	seurat_exp_5
Spp1	8.33803e-48	1.18768	0.618	0.223	1.52336e-43	seurat_exp_5
Egr1	1.05834e-47	-1.06402	0.71	0.938	1.93358e-43	seurat_exp_5
Fam131a	3.30861e-47	-1.13441	0.773	0.947	6.04484e-43	seurat_exp_5
Slc24a2	1.24397e-46	-1.20652	0.816	0.923	2.27274e-42	seurat_exp_5
Aqp4	9.25434e-44	1.08235	0.874	0.606	1.69077e-39	seurat_exp_5
Rph3a	1.01545e-43	-1.05908	0.787	0.925	1.85522e-39	seurat_exp_5
Camk2a	1.31645e-42	-1.05738	0.986	0.998	2.40516e-38	seurat_exp_5
Ptn	2.35429e-42	1.56267	1	0.991	4.30128e-38	seurat_exp_5
Ptpn5	2.10858e-41	-1.21278	0.797	0.962	3.85237e-37	seurat_exp_5
Fbln2	3.54012e-39	1.03315	0.382	0.095	6.4678e-35	seurat_exp_5
Zbtb18	3.00296e-37	-1.05575	0.614	0.878	5.4864e-33	seurat_exp_5
Pde1a	3.93122e-37	-1.08937	0.396	0.784	7.18234e-33	seurat_exp_5
Ntng1	1.7914e-36	1.11331	0.633	0.293	3.2729e-32	seurat_exp_5
Cnr1	5.30542e-36	-1.06693	0.546	0.845	9.69301e-32	seurat_exp_5
Kcnab1	4.03537e-35	-1.35052	0.435	0.759	7.37263e-31	seurat_exp_5
Tesc	4.64745e-35	-1.02658	0.725	0.91	8.49089e-31	seurat_exp_5
Lmo3	4.71404e-35	-1.00917	0.628	0.89	8.61256e-31	seurat_exp_5
Spon1	1.03609e-34	1.01351	0.797	0.521	1.89294e-30	seurat_exp_5
Lamp5	6.86763e-34	-1.07588	0.739	0.912	1.25472e-29	seurat_exp_5
Crym	5.4321e-33	-1.06063	0.343	0.711	9.92444e-29	seurat_exp_5
Arpp21	9.41291e-32	-1.14943	0.971	0.992	1.71974e-27	seurat_exp_5
Gnal	3.80856e-31	-1.11361	0.7	0.883	6.95824e-27	seurat_exp_5
Inf2	1.10954e-30	-1.00333	0.821	0.918	2.02713e-26	seurat_exp_5
Vtn	4.86221e-30	1.40496	0.894	0.729	8.88326e-26	seurat_exp_5
Adcy1	9.38567e-30	-1.0464	0.797	0.901	1.71476e-25	seurat_exp_5
Frzb	1.83255e-28	1.447	0.623	0.32	3.34806e-24	seurat_exp_5
Calb1	3.33949e-28	-1.26932	0.556	0.8	6.10125e-24	seurat_exp_5
Scn4b	4.4234e-28	-1.74417	0.353	0.676	8.08156e-24	seurat_exp_5
Ppp1r1b	6.39954e-28	-2.22207	0.836	0.902	1.1692e-23	seurat_exp_5
Apod	6.5895e-28	1.39201	0.976	0.846	1.2039e-23	seurat_exp_5
Vxn	6.38656e-27	-1.49517	0.585	0.766	1.16682e-22	seurat_exp_5
Gpr88	9.78802e-27	-2.31049	0.536	0.752	1.78827e-22	seurat_exp_5
Pdyn	1.7357e-26	-1.13273	0.15	0.53	3.17113e-22	seurat_exp_5
Lingo1	1.40467e-25	-1.01466	0.894	0.927	2.56633e-21	seurat_exp_5
Neurod6	6.07415e-25	-1.00036	0.072	0.437	1.10975e-20	seurat_exp_5
Pvalb	6.51857e-23	-1.44692	0.667	0.807	1.19094e-18	seurat_exp_5
Pcp4	2.46518e-22	-1.15073	0.995	0.996	4.50389e-18	seurat_exp_5
Mbp	2.94513e-22	-1.54301	1	1	5.38076e-18	seurat_exp_5
Drd1	8.66427e-21	-1.14099	0.092	0.413	1.58296e-16	seurat_exp_5
Kctd12	2.62603e-19	1.62739	0.783	0.685	4.79776e-15	seurat_exp_5
Lrrc10b	4.06422e-19	-1.11806	0.072	0.377	7.42533e-15	seurat_exp_5
Tac1	1.37423e-18	-1.80863	0.551	0.715	2.51072e-14	seurat_exp_5
Gm42418	1.56676e-18	1.14751	1	1	2.86246e-14	seurat_exp_5
Nptxr	4.34392e-18	-1.08538	0.942	0.951	7.93634e-14	seurat_exp_5
Drd2	4.63867e-18	-1.13005	0.058	0.348	8.47486e-14	seurat_exp_5
Mag	1.07394e-17	-1.31128	0.749	0.822	1.9621e-13	seurat_exp_5
Gng7	4.83649e-17	-1.17588	0.507	0.723	8.83626e-13	seurat_exp_5
Mobp	4.19971e-16	-1.59817	0.976	0.928	7.67287e-12	seurat_exp_5
Rgs9	1.66567e-13	-1.53753	0.386	0.584	3.04318e-09	seurat_exp_5
Mal	5.54577e-12	-1.32174	0.845	0.842	1.01321e-07	seurat_exp_5
Pde10a	1.12169e-09	-1.61397	0.744	0.777	2.04932e-05	seurat_exp_5
Cldn11	3.91907e-09	-1.04927	0.729	0.764	7.16013e-05	seurat_exp_5
Pde1b	7.18504e-09	-1.19324	0.957	0.954	0.000131271	seurat_exp_5
Adcy5	1.21123e-08	-1.11969	0.85	0.87	0.000221292	seurat_exp_5
Trf	2.26941e-08	-1.12247	0.899	0.886	0.000414621	seurat_exp_5
Adora2a	2.73033e-08	-1.02816	0.237	0.398	0.00049883	seurat_exp_5
Tnnc1	2.6059e-103	1.38429	0.688	0.138	4.76098e-99	seurat_exp_6
Stx1a	2.43388e-100	1.47744	1	0.868	4.44669e-96	seurat_exp_6
Dkkl1	9.62634e-97	1.29	0.893	0.279	1.75873e-92	seurat_exp_6
Camk2n1	5.92105e-90	1.02112	1	1	1.08178e-85	seurat_exp_6
Pamr1	1.91781e-87	1.11028	0.829	0.245	3.50384e-83	seurat_exp_6
Nrn1	2.948e-86	1.38601	1	0.761	5.386e-82	seurat_exp_6
Cpne9	4.06311e-80	1.03584	0.898	0.309	7.4233e-76	seurat_exp_6
Lmo4	4.60469e-80	1.11336	1	0.935	8.41278e-76	seurat_exp_6
Slc30a3	2.66797e-79	1.25454	0.995	0.596	4.87437e-75	seurat_exp_6
Mef2c	1.41988e-76	1.09718	1	0.949	2.59413e-72	seurat_exp_6
Grm2	1.07396e-73	1.04575	0.907	0.356	1.96213e-69	seurat_exp_6
Neurod6	4.68123e-73	1.06845	0.922	0.367	8.5526e-69	seurat_exp_6
Gfra2	2.58326e-71	1.17309	0.941	0.525	4.71962e-67	seurat_exp_6
Lingo1	1.60253e-70	1.07108	1	0.918	2.92783e-66	seurat_exp_6
Penk	3.09062e-69	-3.39734	0.483	0.899	5.64657e-65	seurat_exp_6
Krt12	3.85983e-68	1.04559	0.907	0.415	7.0519e-64	seurat_exp_6
Rtn4r	7.83121e-66	1.05191	0.98	0.579	1.43076e-61	seurat_exp_6
Nptxr	9.97562e-64	1.01321	1	0.946	1.82255e-59	seurat_exp_6
Cnih3	2.47522e-62	1.09055	0.932	0.531	4.52222e-58	seurat_exp_6
Mical2	1.69984e-60	1.00515	0.99	0.742	3.10561e-56	seurat_exp_6
Plcxd2	1.87552e-57	1.09185	0.927	0.537	3.42658e-53	seurat_exp_6
Cck	3.57689e-56	1.04216	1	0.964	6.53499e-52	seurat_exp_6
Mobp	1.45591e-51	-2.35954	0.81	0.941	2.65994e-47	seurat_exp_6
Mbp	1.23051e-47	-2.02149	1	1	2.24815e-43	seurat_exp_6
Nnat	3.45355e-47	-1.74003	0.434	0.823	6.30963e-43	seurat_exp_6
Efnb3	1.84024e-45	-1.23375	0.302	0.753	3.36211e-41	seurat_exp_6
Plp1	3.65681e-45	-2.32018	0.927	0.981	6.681e-41	seurat_exp_6
Myl4	1.59555e-42	1.10873	0.82	0.372	2.91506e-38	seurat_exp_6
Bcl11b	4.03661e-40	-1.08105	0.4	0.796	7.37489e-36	seurat_exp_6
Pcp4l1	2.09712e-39	-1.70195	0.766	0.913	3.83144e-35	seurat_exp_6
Gad2	2.57633e-38	-1.28342	0.712	0.895	4.70695e-34	seurat_exp_6
Trf	7.57762e-38	-1.79559	0.722	0.901	1.38443e-33	seurat_exp_6
Tesc	1.37449e-37	-1.05827	0.673	0.914	2.51119e-33	seurat_exp_6
Cnp	1.39987e-36	-1.58427	0.78	0.933	2.55757e-32	seurat_exp_6
Necab2	2.12133e-36	-1.26113	0.468	0.79	3.87567e-32	seurat_exp_6
Tac1	7.52511e-36	-2.10596	0.337	0.733	1.37484e-31	seurat_exp_6
Apod	1.23555e-35	-1.84937	0.678	0.87	2.25734e-31	seurat_exp_6
Slc32a1	1.27862e-35	-1.16383	0.756	0.91	2.33604e-31	seurat_exp_6
Ppp1r1b	1.35244e-35	-2.42297	0.829	0.902	2.47092e-31	seurat_exp_6
Mal	2.59158e-34	-1.69409	0.629	0.86	4.73482e-30	seurat_exp_6
Zcchc12	1.11628e-32	-1.12475	0.346	0.725	2.03944e-28	seurat_exp_6
Qdpr	9.24003e-32	-1.16857	0.937	0.967	1.68815e-27	seurat_exp_6
Sez6	1.72838e-31	-1.01551	0.863	0.973	3.15774e-27	seurat_exp_6
Mag	3.73044e-31	-1.512	0.59	0.835	6.81551e-27	seurat_exp_6
Meis2	8.56263e-30	-1.11031	0.639	0.884	1.56439e-25	seurat_exp_6
Cldn11	2.07936e-29	-1.49901	0.507	0.783	3.79899e-25	seurat_exp_6
Car2	1.41431e-27	-1.07224	0.937	0.962	2.58394e-23	seurat_exp_6
Plekhb1	1.53921e-27	-1.28366	0.839	0.925	2.81214e-23	seurat_exp_6
Mog	7.38639e-26	-1.25396	0.376	0.686	1.34949e-21	seurat_exp_6
Gng7	9.5735e-25	-1.37122	0.478	0.725	1.74908e-20	seurat_exp_6
Rgs9	1.00169e-24	-1.75694	0.263	0.594	1.83008e-20	seurat_exp_6
Cryab	1.25742e-23	-1.18178	0.82	0.911	2.29731e-19	seurat_exp_6
Gsn	2.03602e-23	-1.0157	0.415	0.705	3.7198e-19	seurat_exp_6
Gad1	3.35423e-23	-1.04713	0.971	0.974	6.12818e-19	seurat_exp_6
Adora2a	2.50775e-22	-1.37203	0.073	0.411	4.58166e-18	seurat_exp_6
Syndig1l	3.75901e-22	-1.22471	0.122	0.451	6.86771e-18	seurat_exp_6
Bcas1	5.65386e-22	-1.11877	0.585	0.769	1.03296e-17	seurat_exp_6
Pde10a	8.86521e-22	-1.85553	0.585	0.79	1.61967e-17	seurat_exp_6
Drd1	2.66715e-20	-1.14556	0.098	0.412	4.87289e-16	seurat_exp_6
Adcy5	5.74443e-20	-1.38387	0.766	0.877	1.04951e-15	seurat_exp_6
Tspan2	2.15854e-19	-1.0699	0.488	0.731	3.94365e-15	seurat_exp_6
Scn4b	4.67642e-19	-1.58701	0.434	0.669	8.54382e-15	seurat_exp_6
Drd2	1.82854e-18	-1.14899	0.054	0.348	3.34075e-14	seurat_exp_6
Pde1b	1.04632e-16	-1.37191	0.946	0.955	1.91163e-12	seurat_exp_6
Gfap	2.86657e-15	-1.04552	0.249	0.494	5.23722e-11	seurat_exp_6
Ttr	3.72337e-15	-4.52158	0.839	0.897	6.8026e-11	seurat_exp_6
Gpr88	6.77234e-13	-2.01051	0.62	0.745	1.23731e-08	seurat_exp_6
Lrrc10b	2.99109e-12	-1.01902	0.156	0.37	5.46473e-08	seurat_exp_6
Fezf2	4.21351e-111	1.2955	0.865	0.203	7.69808e-107	seurat_exp_7
Trbc2	6.61162e-96	1.22114	0.927	0.254	1.20794e-91	seurat_exp_7
Myl4	5.25109e-90	1.42945	0.964	0.363	9.59375e-86	seurat_exp_7
Scn1b	1.48458e-82	1.06961	1	0.996	2.71233e-78	seurat_exp_7
1110008P14Rik	2.33917e-73	1.06316	1	0.994	4.27366e-69	seurat_exp_7
Galnt9	5.96694e-66	1.06856	0.979	0.54	1.09016e-61	seurat_exp_7
Hs3st2	6.5701e-66	1.11488	0.943	0.464	1.20036e-61	seurat_exp_7
Vxn	2.85829e-63	1.16535	0.995	0.734	5.2221e-59	seurat_exp_7
Dkk3	1.10596e-62	1.10627	0.995	0.748	2.02059e-58	seurat_exp_7
Penk	2.29283e-62	-3.31857	0.474	0.897	4.18901e-58	seurat_exp_7
Sulf2	4.84684e-62	1.00328	0.984	0.616	8.85517e-58	seurat_exp_7
Pde1b	1.69474e-48	-1.88207	0.776	0.968	3.09629e-44	seurat_exp_7
Nnat	1.236e-46	-1.77233	0.417	0.823	2.25817e-42	seurat_exp_7
Igfbp4	4.64774e-45	1.02879	0.958	0.634	8.49142e-41	seurat_exp_7
Necab2	5.08416e-45	-1.42422	0.37	0.795	9.28876e-41	seurat_exp_7
Id4	2.5645e-37	-1.15773	0.479	0.834	4.68535e-33	seurat_exp_7
Gpr88	4.0357e-37	-2.48991	0.354	0.764	7.37322e-33	seurat_exp_7
Ppp1r1b	2.3921e-36	-2.4448	0.766	0.907	4.37037e-32	seurat_exp_7
Pcp4l1	3.51085e-36	-1.67537	0.75	0.914	6.41433e-32	seurat_exp_7
Gad2	3.77813e-35	-1.22709	0.651	0.899	6.90265e-31	seurat_exp_7
Spock3	7.90691e-34	-1.25983	0.562	0.858	1.44459e-29	seurat_exp_7
Apod	9.00974e-30	-1.78513	0.708	0.867	1.64608e-25	seurat_exp_7
Meis2	5.95807e-27	-1.12587	0.703	0.878	1.08854e-22	seurat_exp_7
Zcchc12	7.13271e-27	-1.06289	0.38	0.721	1.30315e-22	seurat_exp_7
Pde10a	7.29572e-27	-1.95407	0.5	0.796	1.33293e-22	seurat_exp_7
Tmem158	8.95798e-27	-1.15062	0.771	0.937	1.63662e-22	seurat_exp_7
Wfs1	1.05023e-26	-1.06366	0.438	0.759	1.91878e-22	seurat_exp_7
Gnal	4.0401e-25	-1.06212	0.682	0.883	7.38126e-21	seurat_exp_7
Rgs9	1.67969e-24	-1.76942	0.245	0.594	3.0688e-20	seurat_exp_7
Calb1	1.04802e-22	-1.14838	0.573	0.797	1.91474e-18	seurat_exp_7
Synpr	1.75999e-22	-1.12758	0.708	0.898	3.2155e-18	seurat_exp_7
Cnp	2.98702e-21	-1.30486	0.885	0.924	5.45729e-17	seurat_exp_7
Cldn11	8.87344e-21	-1.31399	0.562	0.777	1.62118e-16	seurat_exp_7
Hap1	1.07094e-19	-1.10928	0.557	0.793	1.95661e-15	seurat_exp_7
Gfap	1.13836e-18	-1.13532	0.198	0.497	2.07978e-14	seurat_exp_7
Syndig1l	1.47872e-18	-1.17552	0.146	0.447	2.70162e-14	seurat_exp_7
Arpp21	2.11931e-18	-1.00726	0.984	0.99	3.87198e-14	seurat_exp_7
Tac1	3.17161e-17	-1.71481	0.5	0.718	5.79454e-13	seurat_exp_7
Adcy5	5.70251e-17	-1.35511	0.75	0.878	1.04185e-12	seurat_exp_7
Plp1	2.75386e-16	-1.69466	0.995	0.976	5.03129e-12	seurat_exp_7
Lrrc10b	3.0396e-16	-1.10361	0.094	0.374	5.55336e-12	seurat_exp_7
Mal	7.42501e-16	-1.3455	0.776	0.848	1.35655e-11	seurat_exp_7
Adora2a	2.30684e-15	-1.27	0.141	0.404	4.2146e-11	seurat_exp_7
Trf	2.50214e-15	-1.2805	0.849	0.89	4.57141e-11	seurat_exp_7
Ttr	4.3945e-15	-4.53134	0.812	0.899	8.02876e-11	seurat_exp_7
Mobp	4.58555e-15	-1.61508	0.953	0.93	8.37781e-11	seurat_exp_7
Drd2	7.00722e-13	-1.07478	0.109	0.342	1.28022e-08	seurat_exp_7
Mag	4.47944e-12	-1.14183	0.76	0.821	8.18393e-08	seurat_exp_7
Ptgds	1.57883e-10	-1.53283	1	0.99	2.88453e-06	seurat_exp_7
Enpp2	7.03198e-09	-1.2664	0.88	0.9	0.000128474	seurat_exp_7
Gng4	9.34194e-09	-1.13547	0.547	0.688	0.000170677	seurat_exp_7
Gng7	2.29316e-08	-1.03524	0.625	0.713	0.000418961	seurat_exp_7
Rasd2	3.74609e-08	-1.07346	0.766	0.83	0.000684411	seurat_exp_7
Fabp7	4.80925e-08	-1.26629	0.667	0.773	0.00087865	seurat_exp_7
Scn5a	2.68486e-159	1.03966	0.74	0.068	4.90524e-155	seurat_exp_8
Baiap3	4.15128e-147	2.1054	0.896	0.151	7.58438e-143	seurat_exp_8
Gpr101	1.97648e-143	1.29671	0.688	0.068	3.61104e-139	seurat_exp_8
Dlk1	2.43209e-138	1.20353	0.675	0.067	4.44342e-134	seurat_exp_8
AW551984	5.64485e-136	1.28269	0.766	0.095	1.03131e-131	seurat_exp_8
Ngb	2.97307e-130	1.11359	0.682	0.075	5.43181e-126	seurat_exp_8
Nts	2.06584e-126	1.8426	0.955	0.189	3.77429e-122	seurat_exp_8
Zcchc12	6.46817e-89	2.02235	1	0.678	1.18174e-84	seurat_exp_8
Resp18	1.60983e-88	1.87846	1	0.883	2.94116e-84	seurat_exp_8
Nap1l5	2.67735e-88	1.60997	1	0.994	4.89151e-84	seurat_exp_8
Tmem130	1.84483e-85	1.63604	1	0.887	3.37051e-81	seurat_exp_8
Ndn	2.49692e-82	1.53444	1	0.989	4.56188e-78	seurat_exp_8
Ecel1	1.43102e-78	1.12728	0.753	0.167	2.61447e-74	seurat_exp_8
Gprasp2	1.13687e-76	1.6356	0.981	0.782	2.07705e-72	seurat_exp_8
Gaa	2.80084e-76	1.34143	1	0.993	5.11714e-72	seurat_exp_8
Ly6h	7.13608e-76	1.28705	1	0.998	1.30376e-71	seurat_exp_8
Lypd1	7.77317e-76	1.58612	0.987	0.518	1.42016e-71	seurat_exp_8
Ahi1	1.15207e-75	1.7755	1	0.906	2.10483e-71	seurat_exp_8
Hap1	1.00341e-73	2.11924	0.981	0.764	1.83324e-69	seurat_exp_8
Impact	1.56302e-71	1.14855	1	0.967	2.85564e-67	seurat_exp_8
Pgrmc1	1.61216e-70	1.12496	1	0.997	2.94542e-66	seurat_exp_8
Peg3	3.6235e-70	1.24408	1	0.93	6.62014e-66	seurat_exp_8
Rian	7.88982e-70	1.22252	0.994	0.962	1.44147e-65	seurat_exp_8
Nrsn2	2.73349e-69	1.31883	1	0.892	4.99408e-65	seurat_exp_8
Hpcal1	3.99981e-69	1.44756	0.974	0.526	7.30765e-65	seurat_exp_8
Gap43	1.1744e-68	1.23269	1	0.98	2.14562e-64	seurat_exp_8
Gprasp1	1.90475e-68	1.18096	1	0.995	3.47998e-64	seurat_exp_8
Pnck	3.3954e-68	1.59636	0.961	0.734	6.20339e-64	seurat_exp_8
Vat1l	5.86301e-68	1.57911	0.974	0.527	1.07117e-63	seurat_exp_8
Wdr6	1.413e-67	1.50789	0.981	0.799	2.58155e-63	seurat_exp_8
Pnmal2	7.44037e-66	1.29491	1	0.98	1.35936e-61	seurat_exp_8
6330403K07Rik	2.73613e-65	1.51343	1	0.998	4.9989e-61	seurat_exp_8
Scg2	3.34761e-65	1.35661	1	0.97	6.11608e-61	seurat_exp_8
Slc17a7	4.61218e-65	-2.72126	0.429	0.959	8.42644e-61	seurat_exp_8
Nnat	5.18167e-65	1.70538	0.987	0.782	9.4669e-61	seurat_exp_8
Usp29	1.3559e-63	1.15234	0.909	0.409	2.47722e-59	seurat_exp_8
Htr2c	7.10291e-63	1.27467	0.903	0.359	1.2977e-58	seurat_exp_8
Tmem91	1.4153e-62	1.22765	0.948	0.566	2.58576e-58	seurat_exp_8
Disp2	2.29965e-60	1.01117	1	0.936	4.20146e-56	seurat_exp_8
Ddn	2.91465e-60	-1.32111	0.857	0.996	5.32507e-56	seurat_exp_8
Camk2d	4.36325e-58	1.2392	0.987	0.656	7.97166e-54	seurat_exp_8
Sst	5.62522e-58	1.61082	1	0.917	1.02773e-53	seurat_exp_8
Pcdh8	1.22763e-57	1.35008	0.903	0.425	2.24288e-53	seurat_exp_8
Myh7	3.38059e-57	1.17201	0.864	0.35	6.17633e-53	seurat_exp_8
Cacna2d2	3.94485e-56	1.0144	0.87	0.338	7.20723e-52	seurat_exp_8
Cpne7	4.43486e-54	1.29307	0.87	0.402	8.1025e-50	seurat_exp_8
Gad2	8.04116e-53	1.18504	1	0.874	1.46912e-48	seurat_exp_8
Pnoc	1.09795e-52	1.08864	0.688	0.2	2.00595e-48	seurat_exp_8
Slc32a1	4.90394e-51	1.13199	1	0.893	8.9595e-47	seurat_exp_8
Ap1s2	1.00305e-49	1.07787	0.987	0.709	1.83258e-45	seurat_exp_8
Sec14l1	1.04593e-47	-1.10819	0.695	0.974	1.91091e-43	seurat_exp_8
Rasgrp1	1.19395e-46	-1.07413	0.883	0.996	2.18134e-42	seurat_exp_8
Galnt16	1.58923e-46	1.06499	0.981	0.84	2.90353e-42	seurat_exp_8
Itpr1	2.98406e-46	-1.26536	0.779	0.969	5.45188e-42	seurat_exp_8
Arpp19	4.83613e-46	-1.29071	0.961	0.993	8.83561e-42	seurat_exp_8
Pcsk2	4.07331e-45	-1.18134	0.792	0.985	7.44193e-41	seurat_exp_8
Camk2n1	5.04027e-45	-1.12999	1	1	9.20857e-41	seurat_exp_8
Id2	1.48732e-43	-1.1543	0.721	0.957	2.71734e-39	seurat_exp_8
Slc24a2	3.26861e-43	-1.38286	0.617	0.933	5.97175e-39	seurat_exp_8
Dkk3	1.52015e-40	-1.51048	0.318	0.793	2.77732e-36	seurat_exp_8
Inka2	8.76799e-39	-1.06249	0.247	0.769	1.60191e-34	seurat_exp_8
Slc17a6	1.5524e-38	1.18018	0.61	0.202	2.83623e-34	seurat_exp_8
Gabrd	2.98973e-38	-1.07752	0.364	0.832	5.46224e-34	seurat_exp_8
Atp2b4	3.36643e-38	1.1114	0.935	0.749	6.15047e-34	seurat_exp_8
Tac2	1.36812e-37	1.20955	0.636	0.213	2.49956e-33	seurat_exp_8
Inf2	3.05296e-37	-1.29183	0.617	0.929	5.57777e-33	seurat_exp_8
Adcy1	3.63813e-37	-1.35392	0.643	0.908	6.64686e-33	seurat_exp_8
Mef2c	9.45186e-37	-1.20144	0.773	0.963	1.72686e-32	seurat_exp_8
Cabp1	2.28928e-35	-1.15797	0.786	0.951	4.18252e-31	seurat_exp_8
Sv2b	2.50426e-35	-1.26785	0.636	0.919	4.57529e-31	seurat_exp_8
Ttc9b	2.22757e-33	-1.12132	0.929	0.986	4.06978e-29	seurat_exp_8
Lmo4	2.37905e-33	-1.16773	0.825	0.947	4.34653e-29	seurat_exp_8
Stx1a	4.65599e-32	-1.32477	0.662	0.891	8.50649e-28	seurat_exp_8
Zbtb18	4.95248e-32	-1.13194	0.558	0.876	9.04818e-28	seurat_exp_8
1110008P14Rik	8.7714e-32	-1.1315	0.994	0.995	1.60253e-27	seurat_exp_8
Camk2a	3.45105e-31	-1.04941	0.974	0.998	6.30506e-27	seurat_exp_8
Igfbp6	4.91877e-31	-1.08977	0.325	0.75	8.98659e-27	seurat_exp_8
Nrn1	5.00153e-30	-1.41198	0.409	0.802	9.1378e-26	seurat_exp_8
Itpka	7.93537e-29	-1.01127	0.747	0.906	1.44979e-24	seurat_exp_8
Rasl11b	1.75832e-28	-1.05245	0.364	0.767	3.21246e-24	seurat_exp_8
Hbb-bt	8.92549e-28	-1.20023	0.896	0.981	1.63069e-23	seurat_exp_8
Mical2	1.51468e-26	-1.11216	0.455	0.779	2.76732e-22	seurat_exp_8
Hbb-bs	2.47715e-26	-1.10304	1	1	4.52575e-22	seurat_exp_8
Vxn	1.42101e-25	-1.56756	0.474	0.769	2.59619e-21	seurat_exp_8
Hba-a1	5.50069e-25	-1.20007	0.935	0.993	1.00498e-20	seurat_exp_8
Hba-a2	1.9051e-24	-1.20098	0.974	0.992	3.48061e-20	seurat_exp_8
Rtn4r	2.60795e-24	-1.05417	0.247	0.631	4.76472e-20	seurat_exp_8
Nptxr	1.55973e-22	-1.23552	0.857	0.956	2.84963e-18	seurat_exp_8
Ttr	3.28029e-22	-4.72594	0.721	0.903	5.99309e-18	seurat_exp_8
Slc30a3	6.69002e-22	-1.24489	0.299	0.647	1.22227e-17	seurat_exp_8
Pcp4l1	2.01266e-21	-1.32798	0.76	0.911	3.67713e-17	seurat_exp_8
Lingo1	2.20133e-21	-1.05651	0.864	0.928	4.02182e-17	seurat_exp_8
Arpp21	2.75264e-21	-1.08707	0.961	0.992	5.02908e-17	seurat_exp_8
Tbr1	1.85818e-20	-1.01664	0.286	0.634	3.39489e-16	seurat_exp_8
Igfbp2	5.65956e-20	-1.08322	0.234	0.596	1.034e-15	seurat_exp_8
Enpp2	1.9081e-19	-1.52452	0.779	0.906	3.48609e-15	seurat_exp_8
Cck	1.02782e-18	-1.09208	0.864	0.973	1.87783e-14	seurat_exp_8
Ptgds	2.07105e-18	-1.75983	0.968	0.992	3.78381e-14	seurat_exp_8
Hpca	3.11911e-18	-1.28855	0.994	0.966	5.69861e-14	seurat_exp_8
Myl4	2.59493e-15	-1.01718	0.117	0.423	4.74094e-11	seurat_exp_8
Scn4b	2.84123e-14	-1.50553	0.403	0.666	5.19092e-10	seurat_exp_8
Doc2g	1.02122e-06	-1.27566	0.234	0.393	0.0186577	seurat_exp_8
Nts	1.28884e-84	1.37795	0.862	0.197	2.3547e-80	seurat_exp_9
Pdyn	1.61343e-83	2.08139	0.993	0.473	2.94773e-79	seurat_exp_9
Tac1	4.75482e-77	2.4304	1	0.686	8.68705e-73	seurat_exp_9
Strip2	5.66293e-74	1.70152	0.986	0.492	1.03462e-69	seurat_exp_9
Wfs1	1.26434e-70	1.78936	0.986	0.722	2.30995e-66	seurat_exp_9
Drd1	1.33305e-70	1.45002	0.986	0.355	2.43549e-66	seurat_exp_9
Ppp1r2	2.40282e-67	1.47847	1	0.973	4.38996e-63	seurat_exp_9
Slc35d3	2.70653e-67	1.01695	0.828	0.214	4.94483e-63	seurat_exp_9
Otof	2.02224e-65	1.26049	0.641	0.138	3.69463e-61	seurat_exp_9
Gpr83	4.85173e-64	1.37813	0.924	0.397	8.86411e-60	seurat_exp_9
Penk	3.01485e-62	2.12153	1	0.86	5.50813e-58	seurat_exp_9
Gnal	2.92112e-60	1.3131	1	0.862	5.33689e-56	seurat_exp_9
Adora2a	4.43325e-56	1.3398	0.931	0.355	8.09954e-52	seurat_exp_9
Drd2	1.02825e-55	1.04611	0.917	0.292	1.87861e-51	seurat_exp_9
Adcy5	2.32722e-55	1.4115	1	0.861	4.25183e-51	seurat_exp_9
Gng7	9.21368e-55	1.34941	0.993	0.69	1.68334e-50	seurat_exp_9
Rgs9	1.01395e-54	1.4866	0.986	0.545	1.85248e-50	seurat_exp_9
Pde1b	3.58762e-54	1.45991	1	0.952	6.55458e-50	seurat_exp_9
Pde10a	3.98851e-54	1.57	1	0.762	7.287e-50	seurat_exp_9
Gpr88	1.73835e-53	1.61114	1	0.72	3.17597e-49	seurat_exp_9
Gpr6	2.77165e-53	1.11079	0.793	0.234	5.06381e-49	seurat_exp_9
Tmem158	1.97807e-51	1.21057	1	0.921	3.61394e-47	seurat_exp_9
Lrrc10b	2.75817e-51	1.07765	0.917	0.322	5.03918e-47	seurat_exp_9
Arel1	3.62678e-51	1.0655	0.993	0.856	6.62613e-47	seurat_exp_9
Ppp1r1b	2.49879e-50	1.54034	1	0.891	4.5653e-46	seurat_exp_9
Gad2	8.54395e-50	1.13637	1	0.874	1.56098e-45	seurat_exp_9
Inf2	9.38665e-48	1.08551	1	0.906	1.71494e-43	seurat_exp_9
Alcam	1.77867e-47	1.03572	1	0.854	3.24964e-43	seurat_exp_9
Sv2c	5.2297e-47	1.14919	0.924	0.487	9.55466e-43	seurat_exp_9
Cck	1.78404e-46	-2.33982	0.786	0.977	3.25943e-42	seurat_exp_9
Scn4b	1.29736e-45	1.16076	0.986	0.632	2.37028e-41	seurat_exp_9
Arpp21	1.10005e-44	1.06534	1	0.989	2.00979e-40	seurat_exp_9
Ankrd63	6.66921e-44	1.04184	0.883	0.464	1.21846e-39	seurat_exp_9
Stmn1	1.16245e-43	-1.22558	0.993	0.999	2.12379e-39	seurat_exp_9
Slc17a7	2.83209e-41	-1.91937	0.676	0.944	5.17423e-37	seurat_exp_9
Gucy1a1	2.1365e-40	1.33362	0.945	0.692	3.90338e-36	seurat_exp_9
Olfm1	4.23991e-34	-1.51732	1	0.998	7.74632e-30	seurat_exp_9
Ncald	5.54859e-32	-1.12719	0.738	0.959	1.01373e-27	seurat_exp_9
Fxyd7	1.3564e-30	-1.10535	0.717	0.955	2.47814e-26	seurat_exp_9
Stx1a	1.69052e-29	-1.32927	0.662	0.89	3.08859e-25	seurat_exp_9
Rtn4r	9.42651e-29	-1.1537	0.145	0.636	1.72222e-24	seurat_exp_9
Nrn1	1.63943e-28	-1.44182	0.448	0.798	2.99524e-24	seurat_exp_9
Sv2b	2.4253e-28	-1.15602	0.662	0.917	4.43101e-24	seurat_exp_9
Dkk3	1.67808e-27	-1.24397	0.4	0.786	3.06584e-23	seurat_exp_9
Efhd2	3.67682e-26	-1.00736	0.766	0.949	6.71754e-22	seurat_exp_9
Mical2	1.47674e-25	-1.1309	0.441	0.779	2.698e-21	seurat_exp_9
Vxn	7.90068e-25	-1.4978	0.434	0.771	1.44345e-20	seurat_exp_9
Enpp2	2.26065e-21	-1.6169	0.71	0.909	4.1302e-17	seurat_exp_9
Tbr1	1.8133e-20	-1.05015	0.248	0.635	3.31289e-16	seurat_exp_9
Lingo1	4.52349e-20	-1.07646	0.862	0.928	8.26442e-16	seurat_exp_9
Slc30a3	2.39454e-18	-1.18707	0.331	0.644	4.37483e-14	seurat_exp_9
Nptxr	2.40793e-16	-1.15158	0.869	0.955	4.39928e-12	seurat_exp_9
Hba-a1	7.32946e-13	-1.06435	0.986	0.989	1.33909e-08	seurat_exp_9
Hba-a2	1.95307e-12	-1.05077	0.979	0.991	3.56826e-08	seurat_exp_9
Ttr	4.84879e-12	-4.24828	0.793	0.898	8.85873e-08	seurat_exp_9
Gng4	1.50841e-10	-1.2526	0.476	0.689	2.75586e-06	seurat_exp_9
Calb2	8.54823e-10	-1.57787	0.338	0.54	1.56176e-05	seurat_exp_9
Ptgds	2.78349e-09	-1.30372	0.979	0.991	5.08543e-05	seurat_exp_9
Cdhr1	2.31303e-06	-1.08846	0.179	0.342	0.0422591	seurat_exp_9
Igfn1	1.18872e-92	1.04692	0.623	0.081	2.17179e-88	seurat_exp_10
Tafa2	6.0973e-76	1.77524	0.957	0.422	1.11398e-71	seurat_exp_10
Lmo3	2.73817e-73	1.99486	1	0.863	5.00264e-69	seurat_exp_10
Ndst4	1.88799e-62	1.13256	0.58	0.111	3.44936e-58	seurat_exp_10
Tafa1	9.97978e-62	1.15628	0.855	0.266	1.82331e-57	seurat_exp_10
Chgb	4.0993e-58	1.21951	1	0.992	7.48941e-54	seurat_exp_10
Slc30a3	2.43971e-53	1.62579	0.971	0.608	4.45736e-49	seurat_exp_10
Syt17	3.91489e-53	1.16639	0.906	0.381	7.1525e-49	seurat_exp_10
Nptxr	2.82571e-52	1.53056	0.993	0.948	5.16258e-48	seurat_exp_10
Dner	1.04378e-50	1.22083	1	0.895	1.90699e-46	seurat_exp_10
Rprm	3.23624e-50	1.63678	0.942	0.565	5.91261e-46	seurat_exp_10
Nwd2	3.37608e-50	1.00533	0.754	0.248	6.1681e-46	seurat_exp_10
Ttc9b	5.60678e-47	1.06147	1	0.982	1.02436e-42	seurat_exp_10
Plk5	7.91409e-46	1.07116	0.754	0.273	1.4459e-41	seurat_exp_10
Abi3bp	1.12734e-45	1.15203	0.572	0.145	2.05965e-41	seurat_exp_10
Olfm1	1.70991e-45	1.28822	1	0.998	3.12401e-41	seurat_exp_10
Crtac1	9.78358e-42	1.24876	0.899	0.554	1.78746e-37	seurat_exp_10
Ccn3	2.09357e-40	1.24307	0.899	0.495	3.82496e-36	seurat_exp_10
Fam163b	4.86652e-35	1.04862	0.978	0.831	8.89114e-31	seurat_exp_10
Camk2d	6.93653e-35	1.03268	0.942	0.661	1.2673e-30	seurat_exp_10
Cartpt	2.52635e-33	1.73183	0.717	0.314	4.61564e-29	seurat_exp_10
Rasl10a	2.64837e-33	1.00117	0.906	0.576	4.83858e-29	seurat_exp_10
Slc17a7	2.79257e-33	1.08506	1	0.925	5.10203e-29	seurat_exp_10
Rasgef1c	2.16165e-32	1.001	0.855	0.493	3.94934e-28	seurat_exp_10
Hba-a2	1.4374e-31	-1.58238	0.891	0.996	2.62613e-27	seurat_exp_10
Ephb6	3.03517e-30	-1.06233	0.254	0.734	5.54526e-26	seurat_exp_10
Hbb-bt	1.174e-29	-1.46725	0.833	0.984	2.14491e-25	seurat_exp_10
Hba-a1	3.03605e-29	-1.58347	0.906	0.994	5.54687e-25	seurat_exp_10
Serpini1	4.12961e-29	1.05303	0.993	0.956	7.5448e-25	seurat_exp_10
Hbb-bs	1.16208e-28	-1.36927	1	1	2.12312e-24	seurat_exp_10
Hpca	6.89766e-27	-1.45966	0.949	0.969	1.2602e-22	seurat_exp_10
Enpp2	1.14824e-26	-1.76469	0.71	0.908	2.09784e-22	seurat_exp_10
Synpr	1.13348e-25	-1.34331	0.63	0.898	2.07088e-21	seurat_exp_10
Sparc	2.01207e-25	-1.12652	0.761	0.964	3.67606e-21	seurat_exp_10
Cryab	1.5978e-23	-1.28904	0.645	0.918	2.91918e-19	seurat_exp_10
Id3	4.31101e-23	-1.05688	0.377	0.783	7.87622e-19	seurat_exp_10
Sept4	1.22358e-21	-1.06319	0.725	0.934	2.23549e-17	seurat_exp_10
Mbp	3.81807e-21	-1.46924	1	1	6.97561e-17	seurat_exp_10
Meis2	5.50133e-21	-1.15831	0.674	0.876	1.00509e-16	seurat_exp_10
Trf	5.94695e-21	-1.52701	0.674	0.899	1.08651e-16	seurat_exp_10
Mobp	1.6092e-20	-1.66979	0.754	0.941	2.94001e-16	seurat_exp_10
Plekhb1	2.63131e-20	-1.23377	0.761	0.927	4.80741e-16	seurat_exp_10
Mal	6.50662e-20	-1.39373	0.572	0.857	1.18876e-15	seurat_exp_10
Apod	1.36405e-18	-1.60185	0.667	0.866	2.49212e-14	seurat_exp_10
Ttr	2.70474e-18	-4.62588	0.761	0.899	4.94155e-14	seurat_exp_10
Plp1	4.21442e-18	-1.72546	0.935	0.979	7.69974e-14	seurat_exp_10
Mag	4.98342e-18	-1.32709	0.551	0.831	9.1047e-14	seurat_exp_10
Cnp	9.94292e-18	-1.26799	0.746	0.93	1.81657e-13	seurat_exp_10
Mog	1.19625e-17	-1.12292	0.319	0.681	2.18554e-13	seurat_exp_10
Gad1	2.07621e-17	-1.04814	0.87	0.98	3.79324e-13	seurat_exp_10
Qdpr	2.97239e-16	-1.01194	0.87	0.969	5.43055e-12	seurat_exp_10
Bcas1	1.175e-15	-1.0344	0.478	0.77	2.14672e-11	seurat_exp_10
Cldn11	7.07263e-15	-1.2463	0.5	0.776	1.29217e-10	seurat_exp_10
Scn4b	7.36399e-14	-1.52737	0.391	0.665	1.3454e-09	seurat_exp_10
Ptgds	7.3652e-13	-1.52702	0.935	0.994	1.34562e-08	seurat_exp_10
Pvalb	6.8526e-12	-1.15404	0.572	0.809	1.25197e-07	seurat_exp_10
Rasd2	6.02283e-10	-1.17158	0.667	0.834	1.10037e-05	seurat_exp_10
Rgs9	1.62252e-08	-1.47936	0.413	0.578	0.000296434	seurat_exp_10
Adcy5	2.0643e-07	-1.15255	0.804	0.872	0.00377148	seurat_exp_10
Adora2a	2.23363e-07	-1.12597	0.217	0.395	0.00408084	seurat_exp_10
Adamts19	2.69576e-236	1.31564	0.75	0.031	4.92516e-232	seurat_exp_11
Rhcg	5.11243e-183	1.60764	0.841	0.072	9.34041e-179	seurat_exp_11
Ctxn3	6.21587e-152	1.59665	0.833	0.09	1.13564e-147	seurat_exp_11
Vipr2	8.78253e-152	1.33504	0.705	0.057	1.60457e-147	seurat_exp_11
Sp7	1.93216e-148	1.25596	0.773	0.075	3.53007e-144	seurat_exp_11
Sp8	7.94915e-145	1.79977	0.939	0.136	1.45231e-140	seurat_exp_11
Lgr6	1.0646e-137	1.6797	0.826	0.101	1.94502e-133	seurat_exp_11
Scgn	3.55505e-128	1.44372	0.742	0.084	6.49508e-124	seurat_exp_11
Dlx2	1.84235e-125	1.69471	0.962	0.19	3.36598e-121	seurat_exp_11
Igfbpl1	2.42432e-120	1.26662	0.636	0.06	4.42923e-116	seurat_exp_11
Dlx1	3.51202e-119	2.20594	1	0.252	6.41647e-115	seurat_exp_11
Dcx	9.11015e-117	2.14892	0.985	0.254	1.66442e-112	seurat_exp_11
Lgr5	4.04529e-115	1.33493	0.811	0.119	7.39074e-111	seurat_exp_11
Shisa8	4.19751e-113	2.45238	1	0.274	7.66885e-109	seurat_exp_11
Ablim3	9.08159e-111	2.22203	1	0.319	1.65921e-106	seurat_exp_11
Sp9	7.9921e-105	1.86775	0.962	0.249	1.46016e-100	seurat_exp_11
Meis1	1.65843e-102	1.10836	0.864	0.153	3.02995e-98	seurat_exp_11
Tuba8	2.04943e-102	1.71298	0.917	0.22	3.74431e-98	seurat_exp_11
Myo16	3.00843e-100	2.10314	0.977	0.333	5.4964e-96	seurat_exp_11
6430571L13Rik	2.05367e-98	1.12843	0.735	0.114	3.75206e-94	seurat_exp_11
Gcnt1	2.87948e-96	1.0003	0.606	0.071	5.26082e-92	seurat_exp_11
Isoc1	2.11973e-94	2.24097	1	0.413	3.87274e-90	seurat_exp_11
Sall1	3.32833e-91	1.66722	0.947	0.281	6.08085e-87	seurat_exp_11
Map3k1	2.0529e-89	1.11978	0.841	0.17	3.75065e-85	seurat_exp_11
Kank3	3.80898e-88	1.6954	0.97	0.323	6.959e-84	seurat_exp_11
Gng4	4.55804e-88	3.24236	1	0.661	8.32753e-84	seurat_exp_11
Gpsm1	4.6013e-88	2.84258	1	0.687	8.40657e-84	seurat_exp_11
Pbx3	6.3456e-88	2.24976	1	0.514	1.15934e-83	seurat_exp_11
Cacng5	5.06995e-87	1.52687	0.939	0.264	9.26279e-83	seurat_exp_11
Tshz1	3.2892e-86	2.22363	1	0.524	6.00937e-82	seurat_exp_11
Igsf3	3.66986e-86	1.23955	0.841	0.189	6.70483e-82	seurat_exp_11
Dlx5	4.51278e-86	1.33	0.909	0.236	8.24486e-82	seurat_exp_11
Pcbp3	1.05245e-85	2.5022	1	0.755	1.92282e-81	seurat_exp_11
Ptpro	1.47566e-85	2.32639	1	0.563	2.69604e-81	seurat_exp_11
Cpne4	1.60864e-85	2.34671	1	0.607	2.93898e-81	seurat_exp_11
Ppp1r12b	8.88184e-84	1.99431	1	0.641	1.62271e-79	seurat_exp_11
Bambi	6.39478e-83	1.01801	0.742	0.138	1.16833e-78	seurat_exp_11
Synpr	2.41771e-81	2.30853	1	0.878	4.41716e-77	seurat_exp_11
Gm17750	1.45879e-80	1.53778	0.932	0.286	2.66521e-76	seurat_exp_11
Bc1	3.06289e-80	-3.32525	1	1	5.5959e-76	seurat_exp_11
Ampd2	1.75602e-79	1.72752	1	0.68	3.20825e-75	seurat_exp_11
Ankrd6	2.83271e-79	1.44774	0.97	0.351	5.17536e-75	seurat_exp_11
Ppm1e	3.54391e-79	1.87961	1	0.853	6.47472e-75	seurat_exp_11
Meis2	4.01437e-79	1.9347	1	0.859	7.33425e-75	seurat_exp_11
Pbx1	7.96206e-79	1.61894	1	0.862	1.45467e-74	seurat_exp_11
Inpp5j	3.36048e-77	2.22801	1	0.673	6.13959e-73	seurat_exp_11
Csdc2	4.26585e-77	2.02544	1	0.843	7.79371e-73	seurat_exp_11
Lncppara	7.6497e-77	1.04536	0.795	0.177	1.3976e-72	seurat_exp_11
Grb2	8.30401e-77	1.58268	1	0.964	1.51714e-72	seurat_exp_11
Dusp5	9.31532e-77	1.07676	0.78	0.172	1.70191e-72	seurat_exp_11
Gprc5b	1.78223e-75	1.84694	1	0.752	3.25613e-71	seurat_exp_11
Th	4.68548e-75	1.42634	0.864	0.207	8.56037e-71	seurat_exp_11
Gm14204	5.07008e-75	1.09001	0.826	0.195	9.26303e-71	seurat_exp_11
Nrep	6.80406e-75	1.99158	0.992	0.708	1.2431e-70	seurat_exp_11
Kcnip1	7.38168e-75	1.47579	0.985	0.415	1.34863e-70	seurat_exp_11
Rgs12	8.00564e-75	1.65973	0.992	0.513	1.46263e-70	seurat_exp_11
H3f3b	1.00464e-74	1.31381	1	0.998	1.83547e-70	seurat_exp_11
Cpne6	1.05989e-74	2.47045	1	0.856	1.93641e-70	seurat_exp_11
Rasa2	1.19191e-74	1.44831	0.924	0.308	2.17763e-70	seurat_exp_11
mt-Nd2	5.90661e-74	-1.22745	1	1	1.07914e-69	seurat_exp_11
Dclk2	1.33131e-73	1.66149	1	0.737	2.4323e-69	seurat_exp_11
Btg1	1.58012e-73	1.68694	0.992	0.54	2.88688e-69	seurat_exp_11
Dlx6os1	1.7371e-73	1.26102	0.924	0.283	3.17369e-69	seurat_exp_11
Dpysl5	2.2855e-73	1.27395	0.909	0.284	4.17561e-69	seurat_exp_11
Dync1i1	2.56552e-73	1.7504	1	0.899	4.6872e-69	seurat_exp_11
Gprin1	2.62255e-73	1.59728	1	0.78	4.79139e-69	seurat_exp_11
Rpp25	3.0594e-73	1.42013	0.947	0.357	5.58953e-69	seurat_exp_11
Sox4	4.59203e-73	1.47149	0.955	0.31	8.38965e-69	seurat_exp_11
mt-Nd5	4.97468e-73	-1.43805	1	1	9.08875e-69	seurat_exp_11
Grip2	7.99627e-73	1.38488	0.924	0.319	1.46092e-68	seurat_exp_11
Gad1	1.78086e-72	1.89194	1	0.973	3.25363e-68	seurat_exp_11
Sh3bgrl2	1.88133e-72	1.23929	0.902	0.279	3.43718e-68	seurat_exp_11
Syt6	3.76375e-72	1.61483	0.992	0.472	6.87637e-68	seurat_exp_11
Rassf8	4.11746e-72	1.08191	0.879	0.235	7.5226e-68	seurat_exp_11
Ppp1cc	8.05482e-72	1.52577	1	0.984	1.47162e-67	seurat_exp_11
H3f3a	8.88549e-72	1.23858	1	0.999	1.62338e-67	seurat_exp_11
Eml5	1.57326e-71	1.70181	0.992	0.588	2.87435e-67	seurat_exp_11
Chn1	1.70919e-71	-2.08084	0.962	0.999	3.12268e-67	seurat_exp_11
Enc1	2.22293e-71	-2.49593	0.318	0.973	4.0613e-67	seurat_exp_11
Rragd	1.15937e-70	1.59567	1	0.778	2.11817e-66	seurat_exp_11
Gm27032	1.5318e-70	1.53605	0.992	0.538	2.7986e-66	seurat_exp_11
Kcnb2	3.28471e-70	1.2015	0.879	0.263	6.00117e-66	seurat_exp_11
Pcp4l1	5.65053e-70	1.95647	1	0.897	1.03235e-65	seurat_exp_11
Gm47283	9.49641e-70	1.11513	1	1	1.73499e-65	seurat_exp_11
Crmp1	1.18774e-69	1.24247	1	0.962	2.17e-65	seurat_exp_11
Uchl1	1.24051e-69	-1.55649	0.985	1	2.26642e-65	seurat_exp_11
Tubb2a	1.88582e-69	1.08168	1	0.999	3.4454e-65	seurat_exp_11
Adarb2	3.37438e-69	1.08232	0.818	0.209	6.165e-65	seurat_exp_11
Nrip3	3.38477e-69	1.81146	1	0.735	6.18398e-65	seurat_exp_11
Smarcd1	5.08757e-69	1.32087	1	0.948	9.29498e-65	seurat_exp_11
Ndnf	2.52962e-68	1.20219	0.848	0.226	4.62162e-64	seurat_exp_11
mt-Nd3	2.93552e-68	-1.0352	1	1	5.36319e-64	seurat_exp_11
Snx7	5.30386e-68	1.2077	0.894	0.3	9.69016e-64	seurat_exp_11
mt-Nd4	6.78863e-68	-1.02775	1	1	1.24028e-63	seurat_exp_11
Fam171b	1.07749e-67	1.35169	1	0.978	1.96857e-63	seurat_exp_11
Apc	1.41115e-67	1.42357	1	0.893	2.57816e-63	seurat_exp_11
Rasl11b	2.30217e-67	1.86806	0.985	0.731	4.20606e-63	seurat_exp_11
Plekha2	2.63374e-67	1.08121	0.871	0.249	4.81184e-63	seurat_exp_11
Zfp365	3.862e-67	-1.86306	0.576	0.982	7.05587e-63	seurat_exp_11
Abl2	1.46378e-66	1.39896	0.992	0.466	2.67433e-62	seurat_exp_11
Fam184a	3.29521e-66	1.25052	0.932	0.33	6.02034e-62	seurat_exp_11
Gdpd5	3.67019e-66	1.46504	0.985	0.559	6.70543e-62	seurat_exp_11
mt-Co2	6.21607e-66	-1.06212	1	1	1.13568e-61	seurat_exp_11
Grm4	8.19241e-66	1.41022	0.917	0.378	1.49675e-61	seurat_exp_11
Sox1	1.46991e-65	1.12683	0.909	0.294	2.68553e-61	seurat_exp_11
Rph3a	3.18984e-65	-1.96807	0.265	0.948	5.82783e-61	seurat_exp_11
AI593442	4.34292e-65	-1.97756	0.152	0.921	7.93451e-61	seurat_exp_11
Marcksl1	7.35692e-65	1.59735	1	0.814	1.34411e-60	seurat_exp_11
Prkca	7.55261e-65	1.60924	1	0.822	1.37986e-60	seurat_exp_11
Limd2	1.75107e-64	1.36248	0.992	0.907	3.1992e-60	seurat_exp_11
Cdkn1a	1.89462e-64	1.23724	0.864	0.282	3.46146e-60	seurat_exp_11
Ube2e3	4.81342e-64	1.33309	1	0.9	8.79412e-60	seurat_exp_11
Arpp19	7.18867e-64	-1.93358	0.917	0.995	1.31337e-59	seurat_exp_11
Mal2	7.44678e-64	-1.9138	0.076	0.885	1.36053e-59	seurat_exp_11
Tubb2b	8.02954e-64	1.72082	0.992	0.844	1.467e-59	seurat_exp_11
Mapk10	1.40623e-63	-1.63415	0.545	0.979	2.56919e-59	seurat_exp_11
Rgs4	1.90904e-63	-2.08071	0.53	0.98	3.48782e-59	seurat_exp_11
Tspan13	2.74371e-63	-1.53037	0.561	0.986	5.01275e-59	seurat_exp_11
Selenom	2.80598e-63	1.26731	1	0.996	5.12653e-59	seurat_exp_11
Tuba4a	4.1022e-63	-1.37594	0.932	1	7.49472e-59	seurat_exp_11
Camk2b	4.1929e-63	1.1496	1	0.999	7.66044e-59	seurat_exp_11
Gng13	6.25656e-63	-1.67922	0.667	0.985	1.14307e-58	seurat_exp_11
Map2k1	6.7691e-63	1.15763	1	0.997	1.23671e-58	seurat_exp_11
Cacnb3	7.1501e-63	1.17898	1	0.974	1.30632e-58	seurat_exp_11
Sst	8.00119e-63	-2.28555	0.356	0.951	1.46182e-58	seurat_exp_11
Zcchc14	1.06839e-62	1.27272	0.992	0.628	1.95194e-58	seurat_exp_11
Kif2a	1.62675e-62	1.33548	1	0.792	2.97206e-58	seurat_exp_11
Lmo4	1.90609e-62	-2.05305	0.47	0.964	3.48242e-58	seurat_exp_11
Hnrnph1	2.72504e-62	1.09535	1	0.975	4.97865e-58	seurat_exp_11
Bcl11a	4.23994e-62	1.19405	1	0.884	7.74637e-58	seurat_exp_11
Pacsin2	5.03711e-62	1.49772	0.992	0.69	9.20279e-58	seurat_exp_11
Vsnl1	5.24449e-62	-2.14133	0.826	0.992	9.58168e-58	seurat_exp_11
Cacna1c	7.98124e-62	1.27922	0.977	0.51	1.45817e-57	seurat_exp_11
Hap1	1.45276e-61	1.67743	1	0.765	2.65418e-57	seurat_exp_11
Thy1	2.24032e-61	-1.38933	0.902	0.998	4.09307e-57	seurat_exp_11
Calb2	3.54065e-61	1.70407	0.992	0.505	6.46877e-57	seurat_exp_11
Kcnf1	4.12193e-61	1.43922	1	0.813	7.53077e-57	seurat_exp_11
Nefl	4.71277e-61	-1.7526	0.561	0.993	8.61024e-57	seurat_exp_11
Tcp11l2	1.13163e-60	1.17412	0.955	0.423	2.06749e-56	seurat_exp_11
Slc24a2	1.29487e-60	-2.0234	0.333	0.945	2.36573e-56	seurat_exp_11
Ddx17	8.08523e-60	1.07698	1	0.98	1.47717e-55	seurat_exp_11
Rsrp1	9.24041e-60	1.00729	1	0.994	1.68822e-55	seurat_exp_11
Mmp17	9.51532e-60	-1.78565	0.167	0.898	1.73845e-55	seurat_exp_11
Ipcef1	1.0477e-59	1.3572	0.97	0.509	1.91415e-55	seurat_exp_11
Chd3	2.69865e-59	1.00309	1	0.986	4.93044e-55	seurat_exp_11
Rasa1	4.01106e-59	1.22738	0.962	0.539	7.32821e-55	seurat_exp_11
1110008P14Rik	8.19011e-59	-1.80305	0.924	0.998	1.49633e-54	seurat_exp_11
Itpr1	8.91576e-59	-1.7433	0.629	0.975	1.62891e-54	seurat_exp_11
Hist3h2ba	1.17159e-58	1.23135	1	0.819	2.14049e-54	seurat_exp_11
Ppp3cc	3.72377e-58	1.09374	0.902	0.332	6.80332e-54	seurat_exp_11
Fam102b	3.8041e-58	1.28704	0.985	0.629	6.95008e-54	seurat_exp_11
Kif5c	4.03929e-58	-1.47167	0.652	0.99	7.37979e-54	seurat_exp_11
Arx	8.33694e-58	1.23421	0.917	0.388	1.52316e-53	seurat_exp_11
Ngef	1.45958e-57	-1.72922	0.848	0.985	2.66665e-53	seurat_exp_11
C130071C03Rik	1.47566e-57	1.22801	0.932	0.431	2.69604e-53	seurat_exp_11
Rasa3	2.14804e-57	1.31544	0.985	0.651	3.92447e-53	seurat_exp_11
Lingo1	3.29281e-57	-2.04889	0.371	0.953	6.01597e-53	seurat_exp_11
Mir9-3hg	4.83019e-57	1.18974	0.985	0.629	8.82477e-53	seurat_exp_11
Itpka	6.36832e-57	-1.76287	0.303	0.927	1.16349e-52	seurat_exp_11
Hpca	9.63456e-57	-2.38699	0.758	0.979	1.76023e-52	seurat_exp_11
Ppp1r1b	1.20576e-56	-3.27108	0.348	0.925	2.20292e-52	seurat_exp_11
Scn1b	1.22849e-56	-1.51712	0.939	0.999	2.24446e-52	seurat_exp_11
Gm13889	6.34595e-56	1.3181	0.985	0.746	1.15941e-51	seurat_exp_11
Zic1	1.06999e-55	1.00224	0.818	0.239	1.95488e-51	seurat_exp_11
Col6a1	1.20177e-55	1.28262	0.909	0.393	2.19564e-51	seurat_exp_11
Trim9	2.79102e-55	1.02117	1	0.986	5.09919e-51	seurat_exp_11
Podxl2	1.56815e-54	1.00564	1	0.961	2.865e-50	seurat_exp_11
Fyn	1.85783e-54	1.08178	0.992	0.853	3.39426e-50	seurat_exp_11
Dlc1	2.11117e-54	1.13074	0.909	0.404	3.85711e-50	seurat_exp_11
Sez6	2.33537e-54	1.23731	1	0.963	4.26672e-50	seurat_exp_11
Adcyap1r1	2.56905e-54	1.13795	0.992	0.8	4.69366e-50	seurat_exp_11
mt-Nd4l	4.36344e-54	-1.41619	0.742	0.979	7.97201e-50	seurat_exp_11
Pnmal2	6.82918e-54	1.07462	1	0.98	1.24769e-49	seurat_exp_11
Fscn1	9.32785e-54	1.07903	1	0.947	1.7042e-49	seurat_exp_11
Cnr1	1.04896e-53	-1.70435	0.152	0.857	1.91645e-49	seurat_exp_11
Gabra5	1.34971e-53	1.42563	0.947	0.593	2.46592e-49	seurat_exp_11
Hmgn1	1.51596e-53	1.06896	1	0.906	2.76965e-49	seurat_exp_11
Lrba	1.84499e-53	1.07922	0.833	0.296	3.3708e-49	seurat_exp_11
S100a10	1.93283e-53	1.21221	0.992	0.779	3.53129e-49	seurat_exp_11
Ybx1	2.39765e-53	1.0378	1	0.959	4.38051e-49	seurat_exp_11
Scn2b	3.41435e-53	-1.31374	0.492	0.955	6.23801e-49	seurat_exp_11
Ipo13	3.95852e-53	1.14236	0.992	0.773	7.23222e-49	seurat_exp_11
Osbpl1a	6.79897e-53	-1.68002	0.409	0.939	1.24217e-48	seurat_exp_11
Lrp8	1.75653e-52	1.3774	0.932	0.506	3.20919e-48	seurat_exp_11
Hspa2	2.36782e-52	1.10635	0.955	0.461	4.326e-48	seurat_exp_11
Pkig	2.38254e-52	1.02419	1	0.97	4.3529e-48	seurat_exp_11
Ttc39c	4.23934e-52	1.06122	0.856	0.318	7.74527e-48	seurat_exp_11
mt-Atp8	5.58752e-52	-1.43183	0.697	0.969	1.02084e-47	seurat_exp_11
Epb41l3	5.94325e-52	1.01364	1	0.914	1.08583e-47	seurat_exp_11
Kcnab3	1.60018e-51	1.33966	0.955	0.558	2.92353e-47	seurat_exp_11
Gap43	1.95611e-51	-1.44715	0.78	0.991	3.57381e-47	seurat_exp_11
Tiam1	2.85098e-51	1.16573	0.97	0.57	5.20874e-47	seurat_exp_11
Sec14l1	3.36499e-51	1.00312	0.992	0.956	6.14784e-47	seurat_exp_11
Ccsap	3.71544e-51	1.08064	0.977	0.517	6.7881e-47	seurat_exp_11
Slc6a11	3.79343e-51	1.12025	1	0.737	6.93059e-47	seurat_exp_11
Kcnh3	4.30309e-51	1.32491	0.985	0.897	7.86175e-47	seurat_exp_11
Tmem255a	5.37348e-51	1.06501	0.864	0.316	9.81734e-47	seurat_exp_11
Calb1	9.74729e-51	-2.02566	0.114	0.815	1.78083e-46	seurat_exp_11
Cntnap4	1.23802e-50	1.01898	0.765	0.248	2.26186e-46	seurat_exp_11
Sox11	1.70585e-50	1.245	0.773	0.263	3.11659e-46	seurat_exp_11
Clstn1	1.55501e-49	-1.00113	1	1	2.84101e-45	seurat_exp_11
Stxbp6	1.70614e-49	1.54079	0.97	0.595	3.11711e-45	seurat_exp_11
Pitpnm3	3.03683e-49	1.1846	0.962	0.625	5.54829e-45	seurat_exp_11
Cck	3.53594e-49	-2.6465	0.856	0.972	6.46017e-45	seurat_exp_11
Gabra1	4.91746e-49	-1.47317	0.689	0.987	8.98421e-45	seurat_exp_11
Cacna1g	5.09956e-49	1.21736	0.955	0.558	9.3169e-45	seurat_exp_11
Snhg20	5.96499e-49	1.06578	0.985	0.849	1.0898e-44	seurat_exp_11
Hdac4	6.35471e-49	1.09288	0.97	0.644	1.161e-44	seurat_exp_11
Fam20c	9.00039e-49	1.15274	0.985	0.707	1.64437e-44	seurat_exp_11
Dcakd	1.09997e-48	1.06969	0.97	0.547	2.00965e-44	seurat_exp_11
Diras2	1.55434e-48	-1.40021	0.606	0.97	2.83978e-44	seurat_exp_11
Sv2b	1.5855e-48	-1.72623	0.432	0.927	2.8967e-44	seurat_exp_11
Arhgef4	1.63143e-48	-1.21552	0.598	0.967	2.98063e-44	seurat_exp_11
Rnf112	2.84932e-48	-1.36772	0.629	0.956	5.2057e-44	seurat_exp_11
Ypel5	4.53166e-48	1.01009	1	0.91	8.27933e-44	seurat_exp_11
Hist3h2a	5.01505e-48	1.02812	0.985	0.711	9.16249e-44	seurat_exp_11
Metap1d	6.13116e-48	1.02406	0.864	0.341	1.12016e-43	seurat_exp_11
6430548M08Rik	1.65004e-47	1.02087	0.985	0.867	3.01462e-43	seurat_exp_11
Rgs7bp	3.18736e-47	-1.39311	0.667	0.967	5.82331e-43	seurat_exp_11
Jup	3.57392e-47	1.0618	0.97	0.569	6.52956e-43	seurat_exp_11
Homer2	1.13367e-46	1.00953	0.848	0.345	2.07121e-42	seurat_exp_11
Slc9a3r2	1.93869e-46	1.06739	0.962	0.604	3.54199e-42	seurat_exp_11
Cd24a	2.04461e-46	1.20674	0.72	0.218	3.73551e-42	seurat_exp_11
Mpp2	2.96352e-46	1.05459	1	0.691	5.41434e-42	seurat_exp_11
Sipa1l1	7.24359e-46	1.01003	0.992	0.951	1.3234e-41	seurat_exp_11
Nefm	1.59309e-45	-1.51378	0.379	0.9	2.91057e-41	seurat_exp_11
Cabp1	1.99882e-45	-1.48096	0.598	0.959	3.65185e-41	seurat_exp_11
Crabp1	2.55805e-45	1.20232	0.614	0.165	4.67356e-41	seurat_exp_11
Rab15	4.75736e-45	-1.19916	0.394	0.92	8.6917e-41	seurat_exp_11
Ephx4	7.29068e-45	-1.28843	0.227	0.827	1.33201e-40	seurat_exp_11
Dbi	7.32635e-45	1.0821	1	0.999	1.33852e-40	seurat_exp_11
Phf24	3.37394e-44	-1.22353	0.712	0.967	6.1642e-40	seurat_exp_11
Rab6a	3.38996e-44	-1.04188	0.939	0.997	6.19345e-40	seurat_exp_11
Phactr1	7.04438e-44	-1.26524	0.818	0.972	1.28701e-39	seurat_exp_11
Csk	9.28732e-44	1.04964	0.909	0.476	1.69679e-39	seurat_exp_11
Zeb2	1.20797e-43	1.08478	0.962	0.702	2.20697e-39	seurat_exp_11
Cited2	1.52833e-43	1.02063	0.977	0.687	2.79225e-39	seurat_exp_11
Mmd	4.05488e-43	-1.15138	0.742	0.972	7.40827e-39	seurat_exp_11
Pvalb	4.32496e-43	-2.11645	0.258	0.824	7.9017e-39	seurat_exp_11
Brsk2	6.56544e-43	-1.16299	0.318	0.857	1.19951e-38	seurat_exp_11
Gpr88	7.60819e-43	-2.87639	0.136	0.766	1.39002e-38	seurat_exp_11
Reps2	1.07464e-42	-1.15768	0.409	0.889	1.96338e-38	seurat_exp_11
Lix1	2.92166e-42	1.00818	0.924	0.5	5.33788e-38	seurat_exp_11
Nptx1	6.08884e-42	-1.61519	0.25	0.828	1.11243e-37	seurat_exp_11
Kcnab1	1.10713e-41	-1.72414	0.136	0.765	2.02272e-37	seurat_exp_11
Rasd2	1.14105e-41	-1.94723	0.311	0.852	2.0847e-37	seurat_exp_11
Nell2	1.44369e-41	-1.3027	0.644	0.962	2.63761e-37	seurat_exp_11
Elmod1	1.52075e-41	-1.21285	0.841	0.989	2.7784e-37	seurat_exp_11
Pantr1	1.77606e-41	-1.19137	0.583	0.948	3.24486e-37	seurat_exp_11
Lin7b	3.26672e-41	-1.11215	0.576	0.948	5.9683e-37	seurat_exp_11
Syt13	6.57581e-41	-1.37546	0.409	0.899	1.2014e-36	seurat_exp_11
Spock1	7.35953e-41	-1.19423	0.462	0.91	1.34459e-36	seurat_exp_11
Sema3c	1.00228e-40	1.20273	0.727	0.263	1.83116e-36	seurat_exp_11
Trnp1	2.42258e-40	-1.05911	0.811	0.989	4.42605e-36	seurat_exp_11
Gabbr2	8.98793e-40	-1.39806	0.455	0.886	1.6421e-35	seurat_exp_11
Cntnap1	9.33171e-40	-1.11206	0.348	0.877	1.7049e-35	seurat_exp_11
Ly6e	2.13431e-39	-1.13993	0.75	0.981	3.89938e-35	seurat_exp_11
Rab40b	6.54655e-39	1.08066	0.917	0.635	1.19605e-34	seurat_exp_11
Rap1gap	8.24236e-39	-1.23091	0.773	0.979	1.50588e-34	seurat_exp_11
Prkcb	2.3707e-38	-1.04878	0.962	0.993	4.33127e-34	seurat_exp_11
Nrn1	4.33635e-38	-1.79081	0.273	0.806	7.92251e-34	seurat_exp_11
Cplx2	1.43758e-37	-1.06336	0.932	0.988	2.62647e-33	seurat_exp_11
Slc8a1	1.75894e-37	1.01002	0.992	0.828	3.21359e-33	seurat_exp_11
Gnal	1.89523e-37	-1.51993	0.424	0.892	3.46258e-33	seurat_exp_11
Lynx1	2.00753e-37	-1.13067	0.432	0.918	3.66776e-33	seurat_exp_11
Pcsk2	5.16539e-37	-1.12001	0.856	0.98	9.43717e-33	seurat_exp_11
Fam163b	6.03696e-37	1.07301	0.977	0.832	1.10295e-32	seurat_exp_11
Plk2	8.87395e-37	-1.14868	0.576	0.92	1.62127e-32	seurat_exp_11
Arhgdig	9.055e-37	-1.07	0.652	0.961	1.65435e-32	seurat_exp_11
Crym	9.39294e-37	-1.38734	0.136	0.711	1.71609e-32	seurat_exp_11
Vgf	1.16385e-36	-1.02611	0.811	0.982	2.12635e-32	seurat_exp_11
Cnn3	2.81426e-36	1.05087	0.955	0.718	5.14165e-32	seurat_exp_11
Olfm2	3.11242e-36	-1.25797	0.265	0.782	5.6864e-32	seurat_exp_11
Vxn	1.33562e-35	-1.9193	0.28	0.777	2.44018e-31	seurat_exp_11
Adcy1	1.05858e-34	-1.41378	0.591	0.908	1.93402e-30	seurat_exp_11
Tppp	2.82826e-34	-1.00482	0.697	0.952	5.16723e-30	seurat_exp_11
Scn4b	4.79208e-34	-2.07987	0.121	0.679	8.75513e-30	seurat_exp_11
Hspa12a	7.22752e-34	-1.02142	0.379	0.841	1.32047e-29	seurat_exp_11
Lzts3	8.48042e-34	-1.14537	0.508	0.872	1.54937e-29	seurat_exp_11
Arhgap44	8.59781e-34	-1.03311	0.288	0.792	1.57082e-29	seurat_exp_11
Chl1	2.23959e-33	-1.04792	0.136	0.69	4.09173e-29	seurat_exp_11
Caln1	4.5536e-33	-1.14704	0.144	0.688	8.31943e-29	seurat_exp_11
Inka2	4.92286e-33	-1.0718	0.288	0.763	8.99407e-29	seurat_exp_11
Alcam	1.17757e-32	-1.17741	0.53	0.879	2.15141e-28	seurat_exp_11
Npy	2.19458e-32	-1.10483	0.614	0.949	4.0095e-28	seurat_exp_11
Slc30a3	4.24738e-32	-1.57742	0.098	0.654	7.75996e-28	seurat_exp_11
Gng7	4.6758e-32	-1.69956	0.227	0.731	8.54269e-28	seurat_exp_11
Cobl	6.88779e-32	-1.03617	0.212	0.728	1.2584e-27	seurat_exp_11
Cnksr2	3.36854e-31	-1.0253	0.492	0.858	6.15433e-27	seurat_exp_11
Igfbp4	1.24489e-30	-1.27849	0.174	0.682	2.27442e-26	seurat_exp_11
Tiam2	2.83571e-30	1.05151	0.917	0.741	5.18085e-26	seurat_exp_11
Nrgn	4.70087e-30	-1.45658	1	0.998	8.58849e-26	seurat_exp_11
Necab2	4.93242e-30	1.10487	0.992	0.753	9.01152e-26	seurat_exp_11
Ablim2	1.01304e-29	-1.07124	0.5	0.891	1.85082e-25	seurat_exp_11
Ptgds	3.02695e-29	-2.08395	0.977	0.991	5.53025e-25	seurat_exp_11
Adcy5	9.96753e-29	-1.75812	0.591	0.883	1.82107e-24	seurat_exp_11
Ppp3ca	1.47971e-28	-1.05459	1	0.999	2.70344e-24	seurat_exp_11
Resp18	3.04764e-28	-1.08593	0.576	0.906	5.56804e-24	seurat_exp_11
Tbr1	4.40975e-28	-1.33221	0.152	0.638	8.05661e-24	seurat_exp_11
Dkk3	5.94406e-28	-1.35299	0.417	0.783	1.08598e-23	seurat_exp_11
Fxyd7	2.22038e-27	-1.08241	0.826	0.948	4.05663e-23	seurat_exp_11
Slc17a7	1.74769e-26	-1.79051	0.909	0.93	3.19303e-22	seurat_exp_11
Nptxr	6.97572e-26	-1.44099	0.871	0.954	1.27446e-21	seurat_exp_11
Cacna2d3	9.61606e-26	-1.06025	0.341	0.75	1.75685e-21	seurat_exp_11
Olfm1	2.54914e-25	-1.40217	1	0.998	4.65729e-21	seurat_exp_11
Ptpn5	4.68166e-25	-1.15897	0.811	0.956	8.55338e-21	seurat_exp_11
Hba-a1	2.58144e-24	-1.47757	0.985	0.989	4.71629e-20	seurat_exp_11
Pde1a	5.27122e-24	-1.07367	0.394	0.773	9.63052e-20	seurat_exp_11
Neurod2	1.72119e-23	-1.01567	0.03	0.494	3.14462e-19	seurat_exp_11
Hbb-bt	3.97241e-22	-1.35342	0.939	0.978	7.25759e-18	seurat_exp_11
Pde10a	8.12765e-22	-2.02692	0.485	0.79	1.48492e-17	seurat_exp_11
Foxp1	1.60962e-21	-1.01859	0.303	0.678	2.94077e-17	seurat_exp_11
Hba-a2	5.2085e-21	-1.31969	0.985	0.991	9.51593e-17	seurat_exp_11
Pdyn	4.09669e-20	-1.19948	0.114	0.52	7.48466e-16	seurat_exp_11
Ccn3	7.48327e-20	-1.08368	0.136	0.535	1.36719e-15	seurat_exp_11
Id3	7.69339e-20	-1.0018	0.439	0.779	1.40558e-15	seurat_exp_11
Neurod6	6.21838e-18	-1.0301	0.045	0.428	1.1361e-13	seurat_exp_11
Enpp2	2.79832e-17	-1.50396	0.78	0.904	5.11253e-13	seurat_exp_11
Lypd1	4.54294e-17	-1.02847	0.205	0.562	8.29994e-13	seurat_exp_11
Drd1	1.67236e-16	-1.2012	0.045	0.406	3.0554e-12	seurat_exp_11
Stx1a	8.44285e-16	-1.05475	0.788	0.883	1.54251e-11	seurat_exp_11
Ttr	1.08672e-13	-4.5893	0.811	0.897	1.98544e-09	seurat_exp_11
Cryab	1.11585e-13	-1.07621	0.826	0.908	2.03865e-09	seurat_exp_11
Adora2a	1.7846e-13	-1.31894	0.091	0.401	3.26046e-09	seurat_exp_11
Rgs9	2.06422e-13	-1.67406	0.318	0.582	3.77133e-09	seurat_exp_11
Drd2	1.15686e-12	-1.14461	0.045	0.34	2.11359e-08	seurat_exp_11
Syndig1l	2.59571e-11	-1.10546	0.174	0.439	4.74236e-07	seurat_exp_11
Lrrc10b	8.59199e-11	-1.07592	0.106	0.366	1.56976e-06	seurat_exp_11
Tac1	6.74855e-08	-1.01212	0.515	0.712	0.00123296	seurat_exp_11
Pln	3.53678e-69	1.21379	0.488	0.023	6.46169e-65	seurat_exp_12
Kcng4	1.38798e-35	1.21657	0.561	0.07	2.53584e-31	seurat_exp_12
Six3	6.84365e-32	2.46001	0.902	0.263	1.25033e-27	seurat_exp_12
Nr2f2	3.74436e-29	1.96829	0.829	0.229	6.84094e-25	seurat_exp_12
Ramp3	4.85834e-29	2.34058	0.854	0.275	8.87619e-25	seurat_exp_12
Pvalb	1.5433e-28	3.91652	1	0.794	2.81961e-24	seurat_exp_12
Unc13c	8.66698e-24	1.84816	0.878	0.336	1.58346e-19	seurat_exp_12
Kif5a	1.06386e-23	1.32704	1	0.998	1.94367e-19	seurat_exp_12
Kcnc1	3.32652e-22	1.54349	1	0.869	6.07755e-18	seurat_exp_12
Vamp1	7.10947e-22	1.89068	1	0.685	1.2989e-17	seurat_exp_12
Gpx1	1.14923e-21	1.77725	1	0.992	2.09964e-17	seurat_exp_12
Spp1	5.67474e-21	1.88003	0.78	0.246	1.03678e-16	seurat_exp_12
Ctxn1	6.26113e-21	-1.53057	0.976	0.998	1.14391e-16	seurat_exp_12
Btbd11	6.92533e-21	1.44624	0.78	0.259	1.26526e-16	seurat_exp_12
Gad1	8.8544e-21	2.0632	1	0.974	1.6177e-16	seurat_exp_12
Grsf1	9.24607e-21	1.29368	1	0.789	1.68926e-16	seurat_exp_12
Snca	1.11966e-20	-1.35312	0.951	0.999	2.04561e-16	seurat_exp_12
Lgi2	7.96782e-20	2.08921	1	0.607	1.45572e-15	seurat_exp_12
Agt	1.10719e-19	1.4768	0.829	0.303	2.02284e-15	seurat_exp_12
Nrgn	5.09883e-19	-2.26922	1	0.998	9.31556e-15	seurat_exp_12
Adarb1	8.56868e-19	1.34018	1	0.888	1.5655e-14	seurat_exp_12
Qdpr	4.9327e-18	1.12488	1	0.964	9.01205e-14	seurat_exp_12
Nefh	6.15276e-18	1.6415	0.902	0.506	1.12411e-13	seurat_exp_12
AI593442	1.1997e-17	1.38922	1	0.882	2.19186e-13	seurat_exp_12
Plekhb1	1.75322e-17	1.17484	1	0.917	3.20313e-13	seurat_exp_12
Sept4	2.78964e-17	1.138	1	0.922	5.09667e-13	seurat_exp_12
Trf	7.77981e-17	1.36967	1	0.885	1.42137e-12	seurat_exp_12
Mobp	2.87344e-16	1.19114	1	0.93	5.24977e-12	seurat_exp_12
Baiap2	3.17155e-16	-1.24032	0.976	0.99	5.79442e-12	seurat_exp_12
Cnp	4.5814e-16	1.14614	1	0.92	8.37022e-12	seurat_exp_12
Cplx1	4.91692e-16	1.04555	1	0.998	8.98321e-12	seurat_exp_12
Hcn2	1.02865e-15	1.00797	1	0.942	1.87934e-11	seurat_exp_12
Ina	1.06999e-15	1.1129	1	0.944	1.95487e-11	seurat_exp_12
Prkcd	1.78323e-15	2.28391	0.61	0.192	3.25796e-11	seurat_exp_12
Mbp	2.40412e-15	1.06097	1	1	4.39233e-11	seurat_exp_12
Cplx3	2.72803e-15	1.24184	0.659	0.215	4.9841e-11	seurat_exp_12
Esrrg	3.71964e-15	1.5184	0.659	0.245	6.79578e-11	seurat_exp_12
Mag	7.98475e-15	1.13453	1	0.813	1.45881e-10	seurat_exp_12
Cplx2	1.07701e-14	-1.14903	0.976	0.985	1.9677e-10	seurat_exp_12
Hpcal4	1.07908e-14	-1.18459	1	0.991	1.97148e-10	seurat_exp_12
Kcnc3	1.10652e-14	1.18233	0.927	0.607	2.02161e-10	seurat_exp_12
Camkv	1.29033e-14	-1.04561	1	0.997	2.35744e-10	seurat_exp_12
Plp1	1.76596e-14	1.07537	1	0.977	3.22642e-10	seurat_exp_12
Mal	2.05659e-14	1.01324	1	0.84	3.7574e-10	seurat_exp_12
Hapln4	2.06261e-14	1.1135	0.951	0.563	3.76838e-10	seurat_exp_12
Hs3st4	2.13903e-14	1.37746	0.902	0.577	3.908e-10	seurat_exp_12
Ddn	2.65061e-14	-1.03871	1	0.988	4.84266e-10	seurat_exp_12
Pmp22	2.77327e-14	1.08694	0.829	0.412	5.06676e-10	seurat_exp_12
Ptk2b	2.98782e-14	-1.06715	0.976	0.993	5.45874e-10	seurat_exp_12
Atp1a1	3.36156e-14	-1.03979	1	1	6.14157e-10	seurat_exp_12
Ppp3ca	4.31689e-14	-1.28636	1	0.999	7.88697e-10	seurat_exp_12
Patj	6.17914e-14	1.3043	0.585	0.191	1.12893e-09	seurat_exp_12
Fbxl16	6.37049e-14	-1.01367	1	0.998	1.16389e-09	seurat_exp_12
Gad2	7.19329e-14	1.23393	1	0.879	1.31421e-09	seurat_exp_12
Kif5b	9.50858e-14	1.03413	1	0.92	1.73722e-09	seurat_exp_12
Ubash3b	1.43694e-13	1.26989	0.78	0.407	2.62529e-09	seurat_exp_12
Ptprd	1.59408e-13	1.04261	1	0.873	2.91239e-09	seurat_exp_12
Nefm	3.09906e-13	1.12641	1	0.872	5.66198e-09	seurat_exp_12
Camk2n1	3.56703e-13	-1.10495	1	1	6.51696e-09	seurat_exp_12
Ngef	4.95235e-13	-1.26349	0.951	0.979	9.04794e-09	seurat_exp_12
Pcp4l1	8.78624e-13	1.20662	1	0.901	1.60525e-08	seurat_exp_12
Camk2a	2.86488e-12	-1.1979	1	0.997	5.23413e-08	seurat_exp_12
Lmo4	4.61218e-12	-1.30607	0.902	0.94	8.42646e-08	seurat_exp_12
Kcnh2	4.8354e-12	1.06279	0.854	0.513	8.83427e-08	seurat_exp_12
Kcnh3	4.96527e-12	-1.04287	0.756	0.903	9.07154e-08	seurat_exp_12
Tmem88b	1.05881e-11	1.02599	0.854	0.492	1.93444e-07	seurat_exp_12
Arpp21	1.19234e-11	-1.37559	1	0.99	2.1784e-07	seurat_exp_12
Gm2115	1.83632e-11	1.17091	0.537	0.189	3.35496e-07	seurat_exp_12
Gap43	2.64713e-11	-1.00405	0.976	0.981	4.83631e-07	seurat_exp_12
Klhdc8a	4.04098e-11	1.16909	0.707	0.356	7.38288e-07	seurat_exp_12
Fgf1	9.25286e-11	1.19512	0.732	0.453	1.6905e-06	seurat_exp_12
Enc1	1.03396e-10	-1.21442	0.976	0.94	1.88905e-06	seurat_exp_12
Arpp19	1.08655e-10	-1.07189	1	0.991	1.98513e-06	seurat_exp_12
Egr1	1.24645e-10	-1.03051	0.854	0.921	2.27726e-06	seurat_exp_12
Kcnip1	1.55109e-10	1.67023	0.707	0.439	2.83385e-06	seurat_exp_12
Trh	7.67247e-10	1.182	0.512	0.18	1.40176e-05	seurat_exp_12
Lamp5	1.57815e-09	-1.17762	0.805	0.9	2.88327e-05	seurat_exp_12
Rapgef5	1.81554e-09	1.00189	0.927	0.729	3.31699e-05	seurat_exp_12
Itpka	5.66588e-09	-1.00631	0.878	0.897	0.000103516	seurat_exp_12
Hpca	1.30466e-08	-1.50183	1	0.967	0.000238361	seurat_exp_12
Tmem158	3.00716e-07	-1.1488	0.951	0.925	0.00549408	seurat_exp_12
Cpne6	4.21658e-07	-1.16316	0.902	0.863	0.0077037	seurat_exp_12
Synpr	5.58644e-07	-1.30232	0.854	0.885	0.0102064	seurat_exp_12
Stx1a	9.64051e-07	-1.12274	0.902	0.878	0.0176132	seurat_exp_12
Vip	1.2719e-06	-1.06172	0	0.381	0.0232375	seurat_exp_12
Slc17a7	1.62035e-06	-1.51539	1	0.928	0.0296039	seurat_exp_12
Nptx1	1.7422e-06	-1.0819	0.732	0.801	0.03183	seurat_exp_12
Prr32	2.57597e-249	1.6458	0.781	0.008	4.70629e-245	seurat_exp_13
Cldn2	4.66975e-192	1.65305	0.75	0.012	8.53164e-188	seurat_exp_13
Calml4	2.11093e-179	2.81927	0.938	0.024	3.85667e-175	seurat_exp_13
Slc4a5	2.30783e-171	2.00765	0.75	0.014	4.2164e-167	seurat_exp_13
Otx2	1.04506e-170	1.93376	0.719	0.013	1.90933e-166	seurat_exp_13
Kcne2	1.99241e-168	2.18209	0.75	0.015	3.64013e-164	seurat_exp_13
Steap1	1.93013e-167	1.51658	0.719	0.013	3.52635e-163	seurat_exp_13
Tmem72	2.92963e-163	1.86373	0.781	0.017	5.35244e-159	seurat_exp_13
Slc16a8	1.4772e-158	1.33978	0.625	0.01	2.69884e-154	seurat_exp_13
Ccdc153	3.14671e-157	2.1424	0.875	0.024	5.74904e-153	seurat_exp_13
Tmem212	3.63055e-157	2.00181	0.75	0.016	6.63301e-153	seurat_exp_13
Defb11	3.85752e-157	1.343	0.594	0.009	7.0477e-153	seurat_exp_13
F5	2.6918e-149	2.22883	0.812	0.022	4.91791e-145	seurat_exp_13
Col8a2	5.24548e-149	1.49354	0.75	0.018	9.5835e-145	seurat_exp_13
Kcnj13	1.73631e-147	2.46618	0.875	0.027	3.17224e-143	seurat_exp_13
Wfdc2	7.17249e-144	2.2068	0.812	0.023	1.31041e-139	seurat_exp_13
Drc7	2.85905e-143	1.32101	0.594	0.01	5.22348e-139	seurat_exp_13
Smim22	2.08303e-140	1.24741	0.625	0.012	3.80569e-136	seurat_exp_13
Krt18	4.23892e-131	1.38948	0.562	0.01	7.74451e-127	seurat_exp_13
Krt8	4.7191e-128	1.0336	0.469	0.006	8.62179e-124	seurat_exp_13
Folr1	6.25537e-128	3.11427	0.969	0.042	1.14286e-123	seurat_exp_13
Rbm47	3.47894e-126	1.18901	0.594	0.012	6.35602e-122	seurat_exp_13
Cfap126	3.34823e-125	1.64012	0.812	0.028	6.11721e-121	seurat_exp_13
Hdc	4.27075e-111	1.03819	0.625	0.017	7.80266e-107	seurat_exp_13
Lbp	8.51451e-107	2.57864	0.875	0.041	1.5556e-102	seurat_exp_13
2900040C04Rik	1.72878e-105	3.3984	0.906	0.046	3.15847e-101	seurat_exp_13
Lrrc23	2.20938e-101	1.18928	0.688	0.024	4.03653e-97	seurat_exp_13
Trpv4	3.47649e-99	1.90895	0.781	0.035	6.35155e-95	seurat_exp_13
Sostdc1	2.16796e-97	2.25823	0.875	0.046	3.96086e-93	seurat_exp_13
Odf3b	2.77993e-92	1.21843	0.594	0.02	5.07894e-88	seurat_exp_13
Pifo	1.87061e-84	1.05056	0.594	0.022	3.4176e-80	seurat_exp_13
Col8a1	2.81501e-84	1.78242	0.75	0.038	5.14303e-80	seurat_exp_13
Mlf1	1.36429e-83	1.02234	0.656	0.028	2.49255e-79	seurat_exp_13
Prlr	1.554e-83	1.75156	0.688	0.032	2.83916e-79	seurat_exp_13
Tuba1c	1.08903e-82	1.51827	0.75	0.039	1.98966e-78	seurat_exp_13
Dynlrb2	1.84114e-82	1.66395	0.812	0.047	3.36376e-78	seurat_exp_13
Wdr86	4.14389e-80	1.48719	0.562	0.021	7.57088e-76	seurat_exp_13
Abca4	1.12655e-77	1.46986	0.688	0.035	2.05821e-73	seurat_exp_13
Msx1	3.80032e-75	1.9845	0.844	0.059	6.94318e-71	seurat_exp_13
Kl	1.5788e-73	3.63304	0.938	0.08	2.88446e-69	seurat_exp_13
Gm19935	3.82511e-71	1.87167	0.875	0.068	6.98847e-67	seurat_exp_13
Cox8b	5.42601e-70	1.16465	0.594	0.028	9.91331e-66	seurat_exp_13
Capsl	3.62774e-67	1.01709	0.594	0.029	6.62789e-63	seurat_exp_13
Foxj1	1.13981e-66	1.901	0.875	0.072	2.08244e-62	seurat_exp_13
Ecrg4	2.17048e-66	4.50495	1	0.108	3.96547e-62	seurat_exp_13
Rdh5	2.61858e-63	2.37884	0.906	0.086	4.78414e-59	seurat_exp_13
Rsph1	7.86606e-57	1.76662	0.812	0.074	1.43713e-52	seurat_exp_13
Sema3b	1.27804e-56	1.24749	0.656	0.044	2.33498e-52	seurat_exp_13
Mia	1.69436e-56	1.60811	0.688	0.051	3.0956e-52	seurat_exp_13
Cdkn1c	9.03607e-54	1.72135	0.875	0.094	1.65089e-49	seurat_exp_13
Aqp1	1.40284e-49	1.63083	0.688	0.058	2.56299e-45	seurat_exp_13
Clic6	3.26925e-48	3.21433	0.938	0.132	5.97292e-44	seurat_exp_13
Cox6b2	7.19501e-48	1.50355	0.781	0.08	1.31453e-43	seurat_exp_13
A2m	1.48952e-46	1.10361	0.594	0.044	2.72134e-42	seurat_exp_13
Mdfic	3.69369e-46	1.02895	0.625	0.05	6.74836e-42	seurat_exp_13
Thbs4	6.32511e-41	1.08167	0.531	0.04	1.1556e-36	seurat_exp_13
Bmp6	8.46329e-40	1.23069	0.875	0.119	1.54624e-35	seurat_exp_13
Prelp	1.34611e-38	1.79034	0.938	0.164	2.45934e-34	seurat_exp_13
1700007K13Rik	3.29095e-38	1.1086	0.75	0.091	6.01256e-34	seurat_exp_13
Efcab1	4.35744e-38	1.04526	0.812	0.107	7.96104e-34	seurat_exp_13
Slc2a12	8.81918e-36	1.63296	0.781	0.117	1.61126e-31	seurat_exp_13
Slc13a4	1.07439e-35	1.61523	0.594	0.06	1.96291e-31	seurat_exp_13
Fam183b	6.73087e-33	1.19297	0.656	0.08	1.22973e-28	seurat_exp_13
Serinc2	1.11076e-31	1.10802	0.781	0.121	2.02936e-27	seurat_exp_13
Col9a3	7.91436e-31	2.94815	0.969	0.268	1.44595e-26	seurat_exp_13
Aebp1	1.43292e-30	1.09343	0.75	0.109	2.61795e-26	seurat_exp_13
Cul4b	1.51206e-30	1.32344	0.75	0.12	2.76253e-26	seurat_exp_13
Ace	2.48437e-30	2.86168	0.938	0.243	4.53895e-26	seurat_exp_13
Cep162	2.83073e-30	1.09921	0.719	0.11	5.17174e-26	seurat_exp_13
1110017D15Rik	1.35367e-29	1.524	0.844	0.174	2.47316e-25	seurat_exp_13
Igf2	2.57964e-29	2.96125	0.938	0.249	4.71299e-25	seurat_exp_13
Bst2	8.51905e-29	2.23956	0.812	0.167	1.55643e-24	seurat_exp_13
Spa17	4.33286e-28	1.10411	0.75	0.131	7.91613e-24	seurat_exp_13
Car12	2.26849e-27	2.08938	0.906	0.238	4.14453e-23	seurat_exp_13
Lrrc51	3.23545e-26	1.01599	0.688	0.112	5.91116e-22	seurat_exp_13
Gm20501	3.59447e-26	1.31179	0.688	0.114	6.56709e-22	seurat_exp_13
Lgals3bp	9.72137e-25	2.40072	0.938	0.309	1.77609e-20	seurat_exp_13
Tgfbi	1.22328e-24	1.26704	0.5	0.062	2.23493e-20	seurat_exp_13
Ifi27l2a	1.34348e-24	1.31852	0.812	0.171	2.45453e-20	seurat_exp_13
Cab39l	1.95743e-24	2.25253	0.938	0.337	3.57622e-20	seurat_exp_13
Slc29a4	2.07853e-24	1.85744	0.812	0.193	3.79748e-20	seurat_exp_13
Sulf1	2.18216e-24	2.28121	0.844	0.23	3.98681e-20	seurat_exp_13
Pcolce	1.92242e-23	1.579	0.625	0.108	3.51227e-19	seurat_exp_13
Perp	2.19164e-23	1.12286	0.656	0.115	4.00413e-19	seurat_exp_13
Ttr	1.4347e-22	7.25688	1	0.891	2.6212e-18	seurat_exp_13
Enpp2	2.24057e-22	4.89009	1	0.897	4.09352e-18	seurat_exp_13
Fxyd1	6.39399e-22	2.47898	1	0.754	1.16818e-17	seurat_exp_13
Slc4a2	6.48792e-22	2.54568	0.938	0.356	1.18534e-17	seurat_exp_13
Pltp	9.21923e-22	2.16234	1	0.62	1.68435e-17	seurat_exp_13
Meig1	1.14619e-21	1.03011	0.562	0.087	2.09409e-17	seurat_exp_13
Igfbp2	2.33591e-21	3.25339	0.969	0.571	4.2677e-17	seurat_exp_13
Rbp1	3.68885e-21	2.06903	0.938	0.408	6.73952e-17	seurat_exp_13
Rarres2	5.08324e-21	1.91984	0.75	0.19	9.28708e-17	seurat_exp_13
Csrp2	6.59397e-21	1.22995	0.812	0.197	1.20472e-16	seurat_exp_13
Cd24a	6.76026e-21	1.46614	0.844	0.235	1.2351e-16	seurat_exp_13
Ezr	6.81946e-21	1.8979	1	0.549	1.24591e-16	seurat_exp_13
Trpm3	1.82646e-20	2.63633	0.938	0.425	3.33695e-16	seurat_exp_13
Sowahc	3.79563e-20	1.09859	0.656	0.128	6.93461e-16	seurat_exp_13
Cd82	3.83383e-20	1.38151	0.875	0.263	7.00442e-16	seurat_exp_13
Vamp2	5.673e-20	-1.42297	0.969	1	1.03646e-15	seurat_exp_13
1700094D03Rik	5.72733e-20	1.46191	0.719	0.166	1.04638e-15	seurat_exp_13
S100a11	6.37477e-20	1.03921	0.719	0.159	1.16467e-15	seurat_exp_13
Pcsk1n	7.24342e-20	-1.34327	1	1	1.32337e-15	seurat_exp_13
Tspan7	1.45339e-19	-1.22919	1	1	2.65535e-15	seurat_exp_13
Car14	1.67716e-19	1.5473	0.812	0.243	3.06416e-15	seurat_exp_13
Clu	2.46651e-19	1.32455	1	1	4.50632e-15	seurat_exp_13
Slc31a1	4.89823e-19	1.65354	0.812	0.271	8.94906e-15	seurat_exp_13
Ctsd	6.14925e-19	1.58115	1	0.998	1.12347e-14	seurat_exp_13
Ifi27	7.84833e-19	2.30008	0.969	0.637	1.43389e-14	seurat_exp_13
Myo7a	1.24507e-18	1.04571	0.656	0.147	2.27475e-14	seurat_exp_13
Bsg	1.42766e-18	1.29589	1	1	2.60833e-14	seurat_exp_13
Cd9	2.39906e-18	1.64344	1	0.706	4.38309e-14	seurat_exp_13
Ifitm3	2.78451e-18	1.60754	1	0.493	5.08729e-14	seurat_exp_13
Tgfb2	2.86619e-18	1.04494	0.719	0.175	5.23653e-14	seurat_exp_13
Arsg	4.80349e-18	1.12434	0.844	0.258	8.77597e-14	seurat_exp_13
Atp6v0e	6.54726e-18	1.35878	1	0.706	1.19618e-13	seurat_exp_13
Gng5	1.41877e-17	1.3615	1	0.938	2.5921e-13	seurat_exp_13
Dbi	1.4657e-17	1.6472	1	0.999	2.67784e-13	seurat_exp_13
Zwint	1.53096e-17	-1.3334	1	1	2.79707e-13	seurat_exp_13
Eno2	1.75209e-17	-1.36144	0.875	1	3.20108e-13	seurat_exp_13
Tspo	1.86555e-17	1.11271	0.688	0.177	3.40836e-13	seurat_exp_13
Snhg11	1.92493e-17	-1.49115	0.906	1	3.51685e-13	seurat_exp_13
Ccnd2	1.95565e-17	1.66061	0.938	0.504	3.57297e-13	seurat_exp_13
Acta2	2.18508e-17	1.16055	0.625	0.127	3.99215e-13	seurat_exp_13
Rab3a	2.31778e-17	-1.25117	0.938	1	4.23458e-13	seurat_exp_13
Nxn	2.97755e-17	1.13471	0.75	0.213	5.43998e-13	seurat_exp_13
Stmn3	3.05687e-17	-1.39351	0.906	1	5.58491e-13	seurat_exp_13
Atp1a3	3.40689e-17	-1.36114	0.906	1	6.2244e-13	seurat_exp_13
Eef1a2	7.77716e-17	-1.21614	0.969	1	1.42089e-12	seurat_exp_13
Syp	8.46834e-17	-1.57555	0.812	1	1.54717e-12	seurat_exp_13
Gas6	8.5905e-17	1.42143	0.969	0.728	1.56948e-12	seurat_exp_13
Vamp8	1.25939e-16	1.97432	0.812	0.335	2.3009e-12	seurat_exp_13
Ucp2	1.45004e-16	1.75862	0.844	0.327	2.64922e-12	seurat_exp_13
Txnip	1.4836e-16	1.13304	0.719	0.192	2.71053e-12	seurat_exp_13
Tmem98	2.40294e-16	1.21383	0.75	0.214	4.39018e-12	seurat_exp_13
Stxbp1	2.58304e-16	-1.31998	0.875	1	4.71922e-12	seurat_exp_13
Abhd14b	3.26311e-16	1.10101	0.812	0.276	5.9617e-12	seurat_exp_13
Plaat3	3.59094e-16	1.2649	1	0.653	6.56065e-12	seurat_exp_13
Cd63	6.07525e-16	1.59666	0.969	0.852	1.10995e-11	seurat_exp_13
Hemk1	7.4193e-16	1.98218	0.781	0.293	1.35551e-11	seurat_exp_13
Ndrg4	8.08725e-16	-1.31032	1	1	1.47754e-11	seurat_exp_13
Gpx8	8.78842e-16	1.32024	0.656	0.177	1.60565e-11	seurat_exp_13
Tm4sf1	1.09169e-15	1.25805	0.812	0.283	1.99452e-11	seurat_exp_13
Cnn3	1.11633e-15	1.35037	0.969	0.727	2.03954e-11	seurat_exp_13
C1qtnf4	1.42056e-15	-1.28292	0.938	0.999	2.59536e-11	seurat_exp_13
Atp2b2	1.67225e-15	-1.16707	0.969	0.998	3.0552e-11	seurat_exp_13
Ahcyl2	1.82058e-15	1.25301	1	0.743	3.32621e-11	seurat_exp_13
Gabra1	3.3865e-15	-1.65444	0.688	0.976	6.18713e-11	seurat_exp_13
Klc1	3.57601e-15	-1.00923	0.969	1	6.53336e-11	seurat_exp_13
Aldh2	4.33078e-15	1.2899	1	0.757	7.91234e-11	seurat_exp_13
Spint2	4.40606e-15	2.13368	0.875	0.458	8.04988e-11	seurat_exp_13
Camk2n1	4.77135e-15	-1.56922	1	1	8.71726e-11	seurat_exp_13
Npc2	6.85611e-15	1.34394	1	0.836	1.25261e-10	seurat_exp_13
Sncb	7.96252e-15	-1.48807	0.875	0.999	1.45475e-10	seurat_exp_13
Prkar1b	8.60814e-15	-1.48745	0.812	1	1.57271e-10	seurat_exp_13
Hmgb2	9.41472e-15	1.27097	0.625	0.164	1.72007e-10	seurat_exp_13
Bex2	9.43661e-15	-1.09921	1	1	1.72407e-10	seurat_exp_13
Snrpn	9.62399e-15	-1.00487	1	1	1.7583e-10	seurat_exp_13
Ggh	1.22422e-14	1.35682	0.812	0.376	2.23664e-10	seurat_exp_13
Slc12a2	1.28015e-14	1.57463	0.906	0.585	2.33884e-10	seurat_exp_13
Thy1	1.72009e-14	-1.26506	0.906	0.995	3.14261e-10	seurat_exp_13
Dclk1	1.92082e-14	-1.23304	0.906	0.999	3.50934e-10	seurat_exp_13
Sfrp1	2.46813e-14	1.05008	0.594	0.147	4.50926e-10	seurat_exp_13
Cx3cl1	2.72344e-14	-1.14348	0.938	1	4.97573e-10	seurat_exp_13
Meg3	3.32479e-14	-1.28542	0.969	1	6.07439e-10	seurat_exp_13
Plxnb2	3.59132e-14	1.64941	0.875	0.568	6.56134e-10	seurat_exp_13
Sh3d19	4.01564e-14	1.00615	0.531	0.121	7.33657e-10	seurat_exp_13
Rps27l	4.04374e-14	1.10291	1	0.819	7.38791e-10	seurat_exp_13
Snap25	4.90611e-14	-1.30938	1	1	8.96346e-10	seurat_exp_13
Slc12a5	5.25851e-14	-1.18801	0.875	0.998	9.60729e-10	seurat_exp_13
Ephx1	5.87265e-14	1.50387	0.75	0.314	1.07293e-09	seurat_exp_13
Syt1	5.94189e-14	-1.2129	0.938	1	1.08558e-09	seurat_exp_13
Grin1	6.05009e-14	-1.15309	0.812	1	1.10535e-09	seurat_exp_13
Clstn1	6.98531e-14	-1.10121	1	1	1.27622e-09	seurat_exp_13
Nap1l5	9.16465e-14	-1.37877	0.875	0.996	1.67438e-09	seurat_exp_13
Peg13	1.0918e-13	-1.0877	0.906	0.978	1.99472e-09	seurat_exp_13
Slco1c1	1.15681e-13	1.38621	0.938	0.658	2.11348e-09	seurat_exp_13
Arl6ip1	1.16533e-13	1.17946	1	0.993	2.12905e-09	seurat_exp_13
Stk39	1.24969e-13	1.54547	0.875	0.687	2.28318e-09	seurat_exp_13
Ptprn	1.38573e-13	-1.1005	0.875	1	2.53172e-09	seurat_exp_13
Sparcl1	1.47709e-13	-1.11534	0.969	1	2.69865e-09	seurat_exp_13
Calm2	1.69798e-13	-1.07403	1	1	3.10221e-09	seurat_exp_13
Cplx1	1.7377e-13	-1.38918	0.875	0.999	3.17478e-09	seurat_exp_13
Neat1	1.95316e-13	1.15793	0.938	0.541	3.56843e-09	seurat_exp_13
Trim9	2.07972e-13	-1.26247	0.719	0.99	3.79964e-09	seurat_exp_13
Rtl8a	2.35768e-13	-1.04475	0.938	1	4.30748e-09	seurat_exp_13
Cend1	2.44594e-13	-1.19378	0.812	0.997	4.46873e-09	seurat_exp_13
Syn1	2.51012e-13	-1.2153	0.875	0.999	4.58599e-09	seurat_exp_13
Rsph9	2.57874e-13	1.19038	0.75	0.288	4.71135e-09	seurat_exp_13
Map1b	2.63994e-13	-1.05362	0.906	1	4.82317e-09	seurat_exp_13
Sult4a1	3.09014e-13	-1.16644	0.875	0.995	5.64568e-09	seurat_exp_13
Prkacb	3.16225e-13	-1.04605	0.969	0.998	5.77744e-09	seurat_exp_13
Anxa5	3.23895e-13	1.17905	1	0.664	5.91756e-09	seurat_exp_13
Pbxip1	3.24823e-13	1.39998	0.812	0.372	5.93451e-09	seurat_exp_13
Ywhag	3.45194e-13	-1.00633	0.938	1	6.30669e-09	seurat_exp_13
Slc16a2	3.46288e-13	1.13852	0.844	0.355	6.32668e-09	seurat_exp_13
Stx1b	3.75091e-13	-1.09612	0.719	0.996	6.85292e-09	seurat_exp_13
Cdr2	3.87346e-13	1.06953	0.719	0.241	7.07681e-09	seurat_exp_13
Chga	4.83593e-13	-1.25714	0.719	0.958	8.83524e-09	seurat_exp_13
Gng3	5.64622e-13	-1.18269	0.875	1	1.03156e-08	seurat_exp_13
Pdlim4	6.16778e-13	1.01353	0.719	0.241	1.12685e-08	seurat_exp_13
Clstn3	6.82734e-13	-1.1503	0.75	0.972	1.24736e-08	seurat_exp_13
Rtn1	7.02329e-13	-1.05102	1	1	1.28316e-08	seurat_exp_13
Lrp10	8.20096e-13	1.16754	0.906	0.481	1.49832e-08	seurat_exp_13
Vcam1	8.27116e-13	1.19745	0.812	0.333	1.51114e-08	seurat_exp_13
Scg2	1.17e-12	-1.48558	0.75	0.974	2.13759e-08	seurat_exp_13
Slc12a4	1.19614e-12	1.1814	0.75	0.298	2.18536e-08	seurat_exp_13
Mllt11	1.34378e-12	-1.00173	0.969	1	2.45508e-08	seurat_exp_13
Mgst3	1.39848e-12	-1.20089	0.812	0.984	2.55502e-08	seurat_exp_13
Tcn2	1.98405e-12	1.46293	0.781	0.341	3.62485e-08	seurat_exp_13
Slc38a3	2.19266e-12	1.15238	0.969	0.735	4.00599e-08	seurat_exp_13
Rasgrf1	2.21726e-12	-1.11082	0.812	0.99	4.05094e-08	seurat_exp_13
Nrgn	2.37249e-12	-1.95596	1	0.998	4.33454e-08	seurat_exp_13
Nrsn1	2.77696e-12	-1.25343	0.906	0.992	5.0735e-08	seurat_exp_13
Abhd2	3.50812e-12	1.3588	0.844	0.481	6.40933e-08	seurat_exp_13
Tmem59l	3.56321e-12	-1.10961	0.812	0.992	6.50998e-08	seurat_exp_13
Trf	3.65601e-12	1.06586	1	0.886	6.67953e-08	seurat_exp_13
Fbxl16	3.90064e-12	-1.20057	0.906	0.999	7.12648e-08	seurat_exp_13
Nsf	4.06153e-12	-1.01394	0.969	1	7.42042e-08	seurat_exp_13
Lgals1	4.82206e-12	1.36761	0.812	0.391	8.8099e-08	seurat_exp_13
Myl12a	5.33353e-12	1.0966	0.938	0.65	9.74437e-08	seurat_exp_13
Vgf	6.10457e-12	-1.17245	0.781	0.976	1.1153e-07	seurat_exp_13
Metrn	6.53652e-12	1.01826	1	0.779	1.19422e-07	seurat_exp_13
Adgrb1	7.05315e-12	-1.06722	0.812	0.997	1.28861e-07	seurat_exp_13
Tagln3	7.57179e-12	-1.06093	0.875	1	1.38337e-07	seurat_exp_13
Map1a	8.53264e-12	-1.00342	0.875	0.997	1.55891e-07	seurat_exp_13
Odc1	8.97009e-12	1.07495	0.969	0.766	1.63883e-07	seurat_exp_13
Dpp10	9.62467e-12	-1.26824	0.344	0.872	1.75843e-07	seurat_exp_13
Napb	9.66274e-12	-1.05873	0.906	0.993	1.76538e-07	seurat_exp_13
Hist1h2bc	9.70084e-12	1.17832	1	0.869	1.77234e-07	seurat_exp_13
Ddr1	9.94796e-12	1.15785	1	0.648	1.81749e-07	seurat_exp_13
Itpkb	1.00604e-11	1.06748	0.688	0.235	1.83804e-07	seurat_exp_13
Negr1	1.09372e-11	-1.13114	0.531	0.939	1.99823e-07	seurat_exp_13
6430548M08Rik	1.15134e-11	-1.30509	0.375	0.878	2.10351e-07	seurat_exp_13
Gap43	1.16677e-11	-1.32052	0.719	0.984	2.1317e-07	seurat_exp_13
Syngr3	1.23484e-11	-1.0911	0.625	0.978	2.25605e-07	seurat_exp_13
Vim	1.44113e-11	1.55553	0.875	0.524	2.63295e-07	seurat_exp_13
Tbc1d9	1.5494e-11	1.40458	0.875	0.718	2.83075e-07	seurat_exp_13
Podxl2	1.60112e-11	-1.23781	0.688	0.967	2.92524e-07	seurat_exp_13
Uchl1	1.62635e-11	-1.00598	0.969	0.999	2.97134e-07	seurat_exp_13
Etfb	1.76034e-11	1.05331	0.969	0.789	3.21614e-07	seurat_exp_13
Cyp46a1	1.91583e-11	-1.11959	0.719	0.981	3.50021e-07	seurat_exp_13
Emb	2.42118e-11	1.71548	0.688	0.299	4.4235e-07	seurat_exp_13
Sox9	2.89766e-11	1.14238	0.812	0.394	5.29403e-07	seurat_exp_13
H13	3.07104e-11	1.04055	0.969	0.738	5.61078e-07	seurat_exp_13
Rgs4	3.1338e-11	-1.50024	0.781	0.961	5.72545e-07	seurat_exp_13
Gsn	3.15409e-11	1.14287	0.969	0.679	5.76252e-07	seurat_exp_13
Bc1	3.258e-11	-1.17472	1	1	5.95237e-07	seurat_exp_13
Nrcam	3.39742e-11	-1.03199	0.656	0.954	6.20709e-07	seurat_exp_13
Gad1	3.72676e-11	-1.74822	0.812	0.976	6.8088e-07	seurat_exp_13
Tubb3	4.16734e-11	-1.00331	0.875	1	7.61373e-07	seurat_exp_13
Htr2c	4.42402e-11	1.36298	0.812	0.385	8.08269e-07	seurat_exp_13
Sptbn2	4.47051e-11	-1.01247	1	0.994	8.16762e-07	seurat_exp_13
Tspan33	4.47079e-11	1.36923	0.781	0.41	8.16814e-07	seurat_exp_13
Syt4	4.76849e-11	-1.06351	0.656	0.956	8.71202e-07	seurat_exp_13
Vat1l	4.92334e-11	1.41032	0.844	0.549	8.99494e-07	seurat_exp_13
Slc6a1	5.56474e-11	-1.14549	0.781	0.982	1.01668e-06	seurat_exp_13
Nat8l	5.77003e-11	-1.05364	0.781	0.985	1.05418e-06	seurat_exp_13
Rell2	6.00794e-11	-1.08405	0.656	0.937	1.09765e-06	seurat_exp_13
Kcnf1	6.40215e-11	-1.2342	0.281	0.829	1.16967e-06	seurat_exp_13
Resp18	7.02752e-11	-1.37308	0.469	0.894	1.28393e-06	seurat_exp_13
Cacng3	7.33732e-11	-1.17002	0.406	0.884	1.34053e-06	seurat_exp_13
Ascc1	9.09965e-11	1.03734	0.781	0.355	1.66251e-06	seurat_exp_13
Hpcal4	9.43358e-11	-1.14372	0.906	0.992	1.72352e-06	seurat_exp_13
Baalc	1.09543e-10	-1.07691	0.562	0.94	2.00135e-06	seurat_exp_13
Gabrg2	1.10711e-10	-1.06938	0.594	0.951	2.02269e-06	seurat_exp_13
Scn1b	1.16268e-10	-1.15707	0.969	0.997	2.12421e-06	seurat_exp_13
Tmem237	1.17499e-10	1.16614	0.781	0.369	2.14671e-06	seurat_exp_13
Tmem130	1.2091e-10	-1.16877	0.406	0.9	2.20903e-06	seurat_exp_13
Etfa	1.30841e-10	1.03912	0.875	0.59	2.39047e-06	seurat_exp_13
Pip5k1c	1.33165e-10	-1.05445	0.781	0.965	2.43292e-06	seurat_exp_13
Lamp5	1.43982e-10	-1.42863	0.531	0.903	2.63055e-06	seurat_exp_13
Caly	1.47418e-10	-1.04261	0.719	0.998	2.69333e-06	seurat_exp_13
Slc7a10	1.59041e-10	1.14068	0.812	0.435	2.90567e-06	seurat_exp_13
Camk2n2	1.63733e-10	-1.20663	0.719	0.937	2.99141e-06	seurat_exp_13
Acaa2	1.66959e-10	1.27429	0.781	0.387	3.05034e-06	seurat_exp_13
Gpr158	1.77713e-10	-1.10498	0.531	0.903	3.24681e-06	seurat_exp_13
Cpq	1.79841e-10	1.05118	0.656	0.246	3.28569e-06	seurat_exp_13
Basp1	2.81837e-10	-1.16889	0.875	0.999	5.14916e-06	seurat_exp_13
Pcsk2	3.28259e-10	-1.10296	0.938	0.974	5.9973e-06	seurat_exp_13
Acad8	3.3879e-10	1.17781	0.75	0.429	6.18969e-06	seurat_exp_13
Lamp2	3.87146e-10	1.29873	0.906	0.686	7.07316e-06	seurat_exp_13
Ctnna1	4.20922e-10	1.06582	0.906	0.599	7.69024e-06	seurat_exp_13
AI593442	5.34659e-10	-1.29239	0.531	0.888	9.76822e-06	seurat_exp_13
Fgf12	5.59417e-10	-1.01777	0.469	0.891	1.02205e-05	seurat_exp_13
Serpini1	5.86113e-10	-1.25537	0.75	0.961	1.07083e-05	seurat_exp_13
Cacnb3	5.93216e-10	-1.05028	0.781	0.978	1.08381e-05	seurat_exp_13
Prkcb	6.6551e-10	-1.0362	0.875	0.993	1.21589e-05	seurat_exp_13
Bex1	9.74165e-10	-1.00267	0.469	0.907	1.7798e-05	seurat_exp_13
Scn8a	1.06454e-09	-1.01123	0.5	0.921	1.94492e-05	seurat_exp_13
Hba-a2	1.10274e-09	1.60738	1	0.991	2.01471e-05	seurat_exp_13
Shank1	1.11537e-09	-1.17079	0.344	0.82	2.03779e-05	seurat_exp_13
Cd59a	1.14412e-09	1.15817	0.656	0.249	2.0903e-05	seurat_exp_13
Slc32a1	1.25463e-09	-1.44923	0.656	0.902	2.29221e-05	seurat_exp_13
Cacna2d1	1.27355e-09	-1.03159	0.375	0.847	2.32678e-05	seurat_exp_13
Mef2c	1.77235e-09	-1.23579	0.75	0.955	3.23809e-05	seurat_exp_13
Fam163b	1.81482e-09	-1.16342	0.438	0.844	3.31568e-05	seurat_exp_13
Rab3c	1.87159e-09	-1.02793	0.688	0.933	3.4194e-05	seurat_exp_13
Ccnd3	2.27223e-09	1.04958	0.75	0.409	4.15136e-05	seurat_exp_13
S100a6	2.71701e-09	1.42941	0.875	0.66	4.96399e-05	seurat_exp_13
Pak1	2.85001e-09	-1.04565	0.812	0.987	5.20697e-05	seurat_exp_13
Hbb-bs	3.34648e-09	1.47264	1	1	6.11403e-05	seurat_exp_13
Rasl10b	3.49033e-09	-1.00155	0.656	0.946	6.37684e-05	seurat_exp_13
Rph3a	3.77579e-09	-1.17365	0.625	0.918	6.89836e-05	seurat_exp_13
Rap1gap2	3.77744e-09	-1.05051	0.438	0.831	6.90139e-05	seurat_exp_13
Sh3gl2	4.01728e-09	-1.00129	0.75	0.98	7.33957e-05	seurat_exp_13
Atox1	4.08877e-09	1.04291	1	0.994	7.47019e-05	seurat_exp_13
Zfp365	4.3707e-09	-1.02244	0.844	0.963	7.98527e-05	seurat_exp_13
Mpped1	4.37256e-09	-1.1795	0.219	0.745	7.98866e-05	seurat_exp_13
Vsnl1	4.73135e-09	-1.3243	0.906	0.985	8.64418e-05	seurat_exp_13
Golga7b	4.74531e-09	-1.01403	0.344	0.809	8.66968e-05	seurat_exp_13
Hba-a1	5.25364e-09	1.64636	1	0.989	9.59841e-05	seurat_exp_13
Ttc9b	7.63718e-09	-1.17378	0.781	0.985	0.000139531	seurat_exp_13
Camk2a	8.22758e-09	-1.13355	0.969	0.997	0.000150318	seurat_exp_13
Nnat	9.83808e-09	1.15975	1	0.791	0.000179742	seurat_exp_13
Cabp1	1.98649e-08	-1.14753	0.719	0.944	0.000362932	seurat_exp_13
Ltc4s	2.29201e-08	1.32164	0.531	0.208	0.000418751	seurat_exp_13
Sst	2.73455e-08	-1.71575	0.812	0.923	0.000499603	seurat_exp_13
Gfap	2.95064e-08	1.55807	0.906	0.471	0.000539082	seurat_exp_13
Olfm1	3.25998e-08	-1.44729	0.969	0.998	0.000595598	seurat_exp_13
Hbb-bt	3.77406e-08	1.42267	1	0.976	0.00068952	seurat_exp_13
Arpp21	1.07896e-07	-1.04488	0.75	0.993	0.00197126	seurat_exp_13
Calb2	3.6011e-07	-1.97119	0.062	0.535	0.00657922	seurat_exp_13
Synpr	6.73263e-07	-1.3984	0.719	0.886	0.0123005	seurat_exp_13
Reln	7.71528e-07	-1.07458	0.188	0.65	0.0140958	seurat_exp_13
Lingo1	9.80161e-07	-1.13243	0.844	0.926	0.0179075	seurat_exp_13
Npy	1.01299e-06	-1.30943	0.688	0.936	0.0185073	seurat_exp_13
Slc30a3	1.10176e-06	-1.35736	0.219	0.632	0.0201292	seurat_exp_13
Stx1a	1.24337e-06	-1.18279	0.625	0.881	0.0227163	seurat_exp_13
Alas2	1.40136e-06	1.06909	0.656	0.325	0.0256029	seurat_exp_13
Gad2	1.57857e-06	-1.17093	0.688	0.883	0.0288404	seurat_exp_13
Gng4	2.00949e-06	-1.58458	0.281	0.683	0.0367135	seurat_exp_13
Gpsm1	2.72947e-06	-1.1894	0.312	0.707	0.0498674	seurat_exp_13
Il16	2.24141e-83	1.28455	0.76	0.031	4.09505e-79	seurat_exp_14
Spink8	1.10215e-55	2.55411	0.8	0.058	2.01363e-51	seurat_exp_14
Lefty1	2.8214e-47	1.32286	0.56	0.031	5.15469e-43	seurat_exp_14
Klk8	2.08233e-43	1.46945	0.72	0.059	3.80442e-39	seurat_exp_14
Rasd1	5.25459e-37	1.97314	0.8	0.093	9.60013e-33	seurat_exp_14
Shisa6	1.63799e-36	2.10755	1	0.172	2.99261e-32	seurat_exp_14
Npy2r	3.01948e-35	1.61899	0.8	0.091	5.51659e-31	seurat_exp_14
Rnf182	6.08559e-34	1.3567	0.92	0.133	1.11184e-29	seurat_exp_14
Olfml2b	2.66172e-32	1.51094	0.72	0.082	4.86296e-28	seurat_exp_14
Pkp2	1.971e-31	1.26894	0.72	0.084	3.60101e-27	seurat_exp_14
Cabp7	3.47731e-30	3.03544	1	0.232	6.35305e-26	seurat_exp_14
Homer3	3.83589e-28	1.91631	0.84	0.145	7.00818e-24	seurat_exp_14
Neurod6	6.63773e-22	2.82473	1	0.404	1.21271e-17	seurat_exp_14
Kcng2	9.52896e-22	1.1026	0.84	0.157	1.74094e-17	seurat_exp_14
Nr4a3	2.29987e-21	1.82011	0.88	0.234	4.20187e-17	seurat_exp_14
Lats2	6.72994e-21	1.35753	0.92	0.24	1.22956e-16	seurat_exp_14
Grik4	3.2518e-20	1.40199	0.92	0.243	5.94103e-16	seurat_exp_14
Tanc1	1.02184e-19	1.47198	0.88	0.236	1.86691e-15	seurat_exp_14
Thsd4	1.82074e-19	1.05177	0.52	0.068	3.32649e-15	seurat_exp_14
Bhlhe22	2.71975e-19	1.45337	0.96	0.266	4.96899e-15	seurat_exp_14
Nr3c2	1.46141e-18	1.77154	0.96	0.364	2.67e-14	seurat_exp_14
Pcdh20	3.12971e-18	1.56503	0.92	0.281	5.71799e-14	seurat_exp_14
Prdm8	5.9805e-18	1.78643	0.92	0.282	1.09264e-13	seurat_exp_14
Cnih2	1.28334e-17	1.73741	1	0.997	2.34467e-13	seurat_exp_14
Neurod2	1.51754e-17	1.88487	0.96	0.467	2.77254e-13	seurat_exp_14
Gabra5	1.73125e-17	1.93287	1	0.607	3.16299e-13	seurat_exp_14
Slit1	1.98755e-17	1.70142	0.88	0.294	3.63126e-13	seurat_exp_14
Orai2	2.3433e-17	1.43852	1	0.491	4.2812e-13	seurat_exp_14
Wipf3	3.37401e-17	2.24955	1	0.874	6.16431e-13	seurat_exp_14
Nell2	7.49956e-17	1.74884	1	0.946	1.37017e-12	seurat_exp_14
Arhgef25	1.40643e-16	1.52169	1	0.873	2.56955e-12	seurat_exp_14
Zbtb18	1.48293e-16	2.05584	1	0.857	2.70932e-12	seurat_exp_14
Arpc5	3.21002e-16	1.66457	1	0.918	5.86471e-12	seurat_exp_14
Hpca	4.51131e-16	2.45006	1	0.967	8.24217e-12	seurat_exp_14
Epha4	4.76715e-16	1.81553	1	0.815	8.70958e-12	seurat_exp_14
Dock9	6.67363e-16	1.6276	1	0.51	1.21927e-11	seurat_exp_14
Crym	6.9425e-16	1.84601	1	0.68	1.2684e-11	seurat_exp_14
Kcnab2	8.15065e-16	1.28164	1	0.94	1.48912e-11	seurat_exp_14
Chgb	8.85501e-16	2.14338	1	0.992	1.61781e-11	seurat_exp_14
Cpne7	2.22248e-15	1.54778	1	0.424	4.06048e-11	seurat_exp_14
Prkcg	2.4823e-15	1.64325	1	0.939	4.53516e-11	seurat_exp_14
Prkca	3.74709e-15	1.59857	1	0.83	6.84593e-11	seurat_exp_14
Tgfb2	3.95897e-15	1.21035	0.72	0.176	7.23305e-11	seurat_exp_14
Serpina3n	4.31682e-15	1.28699	0.68	0.155	7.88684e-11	seurat_exp_14
Hs3st4	4.66161e-15	1.76637	1	0.578	8.51677e-11	seurat_exp_14
Tafa1	4.75402e-15	1.45654	0.88	0.291	8.68559e-11	seurat_exp_14
Ptk2b	5.58066e-15	1.34821	1	0.993	1.01959e-10	seurat_exp_14
Camta2	6.66613e-15	1.35722	1	0.951	1.2179e-10	seurat_exp_14
Gm2115	6.75234e-15	1.30435	0.76	0.189	1.23365e-10	seurat_exp_14
Nckap1	6.85134e-15	1.05048	1	1	1.25174e-10	seurat_exp_14
Golm1	7.23117e-15	1.04197	0.68	0.155	1.32113e-10	seurat_exp_14
Nbl1	1.10889e-14	1.37817	1	0.513	2.02595e-10	seurat_exp_14
Ckb	1.17888e-14	-1.01111	1	1	2.15382e-10	seurat_exp_14
Cachd1	1.83923e-14	1.39742	0.72	0.2	3.36027e-10	seurat_exp_14
Gria1	1.92345e-14	1.43078	1	0.967	3.51415e-10	seurat_exp_14
Cpne6	2.52287e-14	1.78948	1	0.862	4.60929e-10	seurat_exp_14
Myo5b	3.43842e-14	1.22316	0.88	0.327	6.28199e-10	seurat_exp_14
Rnf112	6.96544e-14	1.3831	1	0.94	1.27259e-09	seurat_exp_14
Dusp5	8.65862e-14	1.02347	0.76	0.196	1.58193e-09	seurat_exp_14
Trhde	9.14277e-14	1.16628	0.8	0.25	1.67038e-09	seurat_exp_14
Galnt17	1.0292e-13	1.38687	0.96	0.423	1.88036e-09	seurat_exp_14
Dock4	1.36059e-13	1.48668	0.96	0.635	2.4858e-09	seurat_exp_14
Ncdn	2.28233e-13	1.18418	1	1	4.16981e-09	seurat_exp_14
Fgf13	2.53884e-13	1.07954	1	0.837	4.63845e-09	seurat_exp_14
Enc1	2.59396e-13	1.39419	1	0.94	4.73917e-09	seurat_exp_14
Ywhah	2.67067e-13	1.25292	1	1	4.87932e-09	seurat_exp_14
Aak1	2.78228e-13	1.03473	1	0.982	5.08323e-09	seurat_exp_14
Adam11	2.84159e-13	1.14092	1	0.734	5.19158e-09	seurat_exp_14
Ly6e	2.94959e-13	1.26253	1	0.97	5.3889e-09	seurat_exp_14
Tmsb4x	3.14493e-13	1.28928	1	1	5.74578e-09	seurat_exp_14
Nsf	3.22735e-13	1.03592	1	0.999	5.89636e-09	seurat_exp_14
Prkacb	3.73978e-13	-1.24824	0.92	0.999	6.83259e-09	seurat_exp_14
Trim2	3.98862e-13	1.08567	1	0.982	7.28721e-09	seurat_exp_14
Nsmf	4.74965e-13	1.12406	1	0.978	8.67761e-09	seurat_exp_14
Nefl	4.86039e-13	1.35076	1	0.972	8.87994e-09	seurat_exp_14
Grin2a	5.44585e-13	1.48614	1	0.879	9.94957e-09	seurat_exp_14
Ppm1e	5.65757e-13	1.40259	1	0.859	1.03364e-08	seurat_exp_14
Fgfr1	7.72563e-13	1.11128	1	0.596	1.41147e-08	seurat_exp_14
Slc24a2	8.89189e-13	1.31546	1	0.914	1.62455e-08	seurat_exp_14
Lrrn2	8.95558e-13	1.45257	1	0.897	1.63618e-08	seurat_exp_14
Ppp3r1	1.22219e-12	1.06182	1	1	2.23294e-08	seurat_exp_14
Zbtb20	1.27694e-12	1.34732	0.92	0.457	2.33298e-08	seurat_exp_14
Tubb2a	1.39365e-12	1.00197	1	0.999	2.54619e-08	seurat_exp_14
Adora1	2.05285e-12	1.08586	1	0.776	3.75056e-08	seurat_exp_14
Dkk3	2.59523e-12	1.55296	1	0.763	4.74149e-08	seurat_exp_14
Arpp21	2.87394e-12	-1.92283	0.92	0.991	5.25069e-08	seurat_exp_14
Sh3bp5	3.24382e-12	1.13806	0.96	0.453	5.92646e-08	seurat_exp_14
Ngef	5.71078e-12	-1.76272	0.72	0.981	1.04336e-07	seurat_exp_14
Rasgrp1	1.05954e-11	1.12849	1	0.989	1.93578e-07	seurat_exp_14
Ccdc3	1.16642e-11	1.0971	0.64	0.183	2.13105e-07	seurat_exp_14
Stim2	1.18461e-11	1.33085	0.92	0.672	2.16428e-07	seurat_exp_14
Ak5	1.25835e-11	1.56438	1	0.761	2.29901e-07	seurat_exp_14
Pgm2l1	1.39665e-11	1.29784	1	0.923	2.55167e-07	seurat_exp_14
Nt5dc3	1.53307e-11	1.64055	0.96	0.639	2.80091e-07	seurat_exp_14
Cpne4	1.69628e-11	1.49627	0.96	0.623	3.0991e-07	seurat_exp_14
Sv2b	1.80577e-11	1.25754	1	0.902	3.29915e-07	seurat_exp_14
Prickle2	2.02481e-11	1.19753	1	0.824	3.69934e-07	seurat_exp_14
Zdhhc23	2.96021e-11	1.27	0.8	0.296	5.40831e-07	seurat_exp_14
Slc17a7	3.25372e-11	1.20949	1	0.928	5.94454e-07	seurat_exp_14
2900026A02Rik	3.38371e-11	1.09636	0.84	0.366	6.18203e-07	seurat_exp_14
Clstn2	3.50438e-11	1.40027	0.92	0.618	6.4025e-07	seurat_exp_14
Sipa1l3	3.76485e-11	1.12278	0.92	0.448	6.87839e-07	seurat_exp_14
Arpp19	3.84194e-11	-1.59509	0.96	0.991	7.01922e-07	seurat_exp_14
Arpc2	4.40625e-11	1.09223	1	0.995	8.05021e-07	seurat_exp_14
Cspg5	4.54583e-11	-1.11686	0.88	0.996	8.30524e-07	seurat_exp_14
Mef2c	4.81553e-11	-1.69057	0.48	0.957	8.79798e-07	seurat_exp_14
Cnksr2	4.92005e-11	1.07306	1	0.838	8.98893e-07	seurat_exp_14
Mast3	5.55907e-11	1.00306	1	0.947	1.01564e-06	seurat_exp_14
Camk1d	5.84038e-11	1.15419	0.96	0.818	1.06704e-06	seurat_exp_14
Arhgap39	7.31255e-11	1.18592	0.88	0.552	1.336e-06	seurat_exp_14
Plxna1	7.39554e-11	1.05601	0.92	0.455	1.35117e-06	seurat_exp_14
Synj1	7.47758e-11	1.00921	1	0.993	1.36615e-06	seurat_exp_14
Kcnf1	8.0669e-11	-1.42915	0.2	0.828	1.47382e-06	seurat_exp_14
Camk2a	8.07616e-11	1.02838	1	0.997	1.47551e-06	seurat_exp_14
Timp2	8.90679e-11	-1.34791	0.56	0.969	1.62727e-06	seurat_exp_14
Stum	1.0021e-10	1.12774	0.96	0.686	1.83083e-06	seurat_exp_14
Nptxr	1.44234e-10	1.53695	1	0.949	2.63515e-06	seurat_exp_14
Ccnd2	1.85588e-10	1.39338	0.92	0.505	3.39069e-06	seurat_exp_14
Stmn1	1.87366e-10	-1.40943	1	0.999	3.42318e-06	seurat_exp_14
Hapln4	2.3405e-10	1.13218	0.96	0.565	4.2761e-06	seurat_exp_14
Syn2	2.41896e-10	1.26017	1	0.997	4.41945e-06	seurat_exp_14
Lurap1l	3.30824e-10	1.16832	0.72	0.284	6.04415e-06	seurat_exp_14
Elmo1	3.37943e-10	-1.26288	0.4	0.926	6.17422e-06	seurat_exp_14
Amph	3.61029e-10	1.11428	1	0.94	6.596e-06	seurat_exp_14
Mmd	3.63424e-10	1.43195	1	0.96	6.63976e-06	seurat_exp_14
Crip2	5.39776e-10	-1.1116	0.8	0.978	9.86171e-06	seurat_exp_14
Wasf1	6.10759e-10	1.1368	1	0.958	1.11586e-05	seurat_exp_14
Ogfrl1	6.68204e-10	1.29984	1	0.895	1.22081e-05	seurat_exp_14
Rnd2	1.37883e-09	-1.23614	0.36	0.9	2.51913e-05	seurat_exp_14
Pkig	1.44527e-09	-1.1834	0.52	0.975	2.6405e-05	seurat_exp_14
Cck	1.73822e-09	1.27783	1	0.966	3.17572e-05	seurat_exp_14
Cpne5	1.81468e-09	-1.30238	0.28	0.818	3.31542e-05	seurat_exp_14
Chst2	1.87858e-09	1.15395	1	0.924	3.43216e-05	seurat_exp_14
Bok	1.92802e-09	1.74882	0.92	0.612	3.52248e-05	seurat_exp_14
Amigo2	2.59725e-09	1.18774	0.56	0.161	4.74518e-05	seurat_exp_14
Gabrd	2.62886e-09	-1.26387	0.2	0.811	4.80293e-05	seurat_exp_14
Id2	2.8049e-09	-1.27863	0.68	0.946	5.12455e-05	seurat_exp_14
Iqgap2	2.84677e-09	1.03254	0.68	0.237	5.20106e-05	seurat_exp_14
Fam131a	2.87828e-09	1.41981	0.96	0.933	5.25861e-05	seurat_exp_14
Prkcd	2.90711e-09	1.05103	0.6	0.194	5.31128e-05	seurat_exp_14
Dagla	2.99472e-09	1.20541	0.92	0.698	5.47135e-05	seurat_exp_14
Gad2	3.07231e-09	-1.74907	0.52	0.884	5.61311e-05	seurat_exp_14
Rgs14	3.36006e-09	2.01372	0.96	0.539	6.13884e-05	seurat_exp_14
Gpr22	3.40103e-09	1.05277	0.84	0.398	6.21367e-05	seurat_exp_14
St6galnac5	3.47751e-09	1.46328	0.84	0.524	6.35342e-05	seurat_exp_14
Kctd4	3.49729e-09	1.26793	0.72	0.277	6.38955e-05	seurat_exp_14
Epha5	4.14347e-09	1.06082	1	0.724	7.57012e-05	seurat_exp_14
Rapgef5	4.22809e-09	1.29075	0.96	0.73	7.72472e-05	seurat_exp_14
Anxa11	4.31639e-09	1.03602	0.72	0.299	7.88604e-05	seurat_exp_14
Lrrtm3	5.79252e-09	-1.10798	0	0.644	0.000105829	seurat_exp_14
Pde1b	6.14581e-09	-1.99049	0.76	0.956	0.000112284	seurat_exp_14
Nptx1	7.72945e-09	1.5381	1	0.798	0.000141217	seurat_exp_14
Cobl	1.11485e-08	-1.17412	0.08	0.709	0.000203683	seurat_exp_14
Gpc1	1.161e-08	1.07658	0.84	0.433	0.000212115	seurat_exp_14
Ivns1abp	1.21397e-08	-1.1462	0.56	0.941	0.000221792	seurat_exp_14
Npy	1.21751e-08	-1.84023	0.64	0.936	0.00022244	seurat_exp_14
Gpr88	1.49235e-08	-2.76598	0.16	0.74	0.000272651	seurat_exp_14
Dpp10	1.57354e-08	-1.17872	0.36	0.87	0.000287486	seurat_exp_14
Marcks	1.62865e-08	-1.00655	0.84	0.993	0.000297554	seurat_exp_14
Rcan2	2.3915e-08	-1.08542	0.6	0.939	0.000436927	seurat_exp_14
Gabra3	2.8005e-08	-1.09463	0	0.613	0.000511652	seurat_exp_14
Epha7	2.96769e-08	1.2546	0.88	0.522	0.000542198	seurat_exp_14
Sms	3.11903e-08	1.19416	0.96	0.746	0.000569846	seurat_exp_14
Susd6	3.16341e-08	1.13663	0.72	0.334	0.000577954	seurat_exp_14
Ptn	3.69833e-08	-1.17306	0.84	0.993	0.000675684	seurat_exp_14
Sst	5.51279e-08	-2.14763	0.68	0.924	0.00100719	seurat_exp_14
Atp2b4	5.95602e-08	-1.21789	0.16	0.766	0.00108817	seurat_exp_14
Gad1	6.12218e-08	-1.42157	0.76	0.976	0.00111852	seurat_exp_14
Lamp5	7.87942e-08	-1.31764	0.44	0.903	0.00143957	seurat_exp_14
Mfge8	8.8647e-08	-1.0602	0.6	0.946	0.00161958	seurat_exp_14
Igfbp6	9.82665e-08	-1.25083	0.2	0.73	0.00179533	seurat_exp_14
Tmsb10	1.06052e-07	-1.0176	0.76	1	0.00193757	seurat_exp_14
Spock1	1.07143e-07	1.08845	0.96	0.888	0.0019575	seurat_exp_14
Meis2	1.15881e-07	-1.51581	0.48	0.869	0.00211715	seurat_exp_14
Pcp4l1	1.20879e-07	-1.92703	0.64	0.904	0.00220845	seurat_exp_14
Adgrl2	1.20948e-07	-1.03748	0.08	0.641	0.00220972	seurat_exp_14
Pls3	1.38799e-07	1.02687	0.96	0.828	0.00253586	seurat_exp_14
Rab3b	1.45243e-07	-1.25291	0.36	0.81	0.00265358	seurat_exp_14
Plch2	1.76211e-07	1.17034	0.88	0.586	0.00321937	seurat_exp_14
Sh3gl2	1.86164e-07	1.00281	1	0.978	0.00340122	seurat_exp_14
Nrip3	1.95648e-07	1.11075	0.96	0.746	0.00357449	seurat_exp_14
Camk2d	2.29478e-07	-1.14514	0.16	0.68	0.00419257	seurat_exp_14
Necab1	2.32771e-07	-1.00116	0.24	0.775	0.00425272	seurat_exp_14
Tiam1	2.73622e-07	-1.09485	0.04	0.595	0.00499907	seurat_exp_14
Fam163b	2.82247e-07	-1.12697	0.48	0.842	0.00515665	seurat_exp_14
Tmem91	2.98512e-07	-1.05839	0.04	0.593	0.00545382	seurat_exp_14
Nrn1	3.30487e-07	1.07546	0.96	0.778	0.006038	seurat_exp_14
Rprm	3.65198e-07	-1.36835	0.04	0.589	0.00667217	seurat_exp_14
Pcp4	3.65457e-07	-1.53213	0.96	0.996	0.0066769	seurat_exp_14
Tmem178	3.98253e-07	1.05965	0.92	0.585	0.00727609	seurat_exp_14
Rims3	5.27102e-07	-1.04259	0.32	0.77	0.00963015	seurat_exp_14
Scg2	5.74344e-07	-1.1628	0.8	0.973	0.0104933	seurat_exp_14
Slc8a1	6.49683e-07	1.04101	0.96	0.835	0.0118697	seurat_exp_14
Slc32a1	7.05442e-07	-1.29826	0.6	0.901	0.0128884	seurat_exp_14
S100a10	8.37216e-07	-1.0275	0.28	0.794	0.0152959	seurat_exp_14
Marcksl1	1.35149e-06	-1.2632	0.36	0.828	0.0246917	seurat_exp_14
Hap1	2.18795e-06	-1.43845	0.44	0.78	0.0399738	seurat_exp_14
Cck	6.49138e-102	1.05	0.993	0.96	1.18598e-97	seurat_psf_0
Vxn	2.15261e-88	1.03494	0.942	0.706	3.93282e-84	seurat_psf_0
Penk	6.29116e-71	-2.05586	0.721	0.903	1.14939e-66	seurat_psf_0
Pcp4l1	1.09683e-65	-1.27343	0.809	0.925	2.0039e-61	seurat_psf_0
Apod	3.00533e-44	-1.34109	0.755	0.881	5.49075e-40	seurat_psf_0
Syndig1l	1.04582e-41	-1.12233	0.187	0.485	1.91071e-37	seurat_psf_0
Plp1	1.98819e-39	-1.42385	0.957	0.982	3.63242e-35	seurat_psf_0
Rgs9	1.82784e-38	-1.45301	0.361	0.621	3.33947e-34	seurat_psf_0
Trf	2.69451e-37	-1.0905	0.828	0.902	4.92287e-33	seurat_psf_0
Mobp	4.81662e-37	-1.23363	0.871	0.946	8.79997e-33	seurat_psf_0
Adcy5	1.97942e-36	-1.21578	0.783	0.89	3.6164e-32	seurat_psf_0
Cnp	2.30341e-36	-1.04653	0.873	0.933	4.20833e-32	seurat_psf_0
Pde1b	5.0883e-35	-1.25998	0.893	0.969	9.29632e-31	seurat_psf_0
Cldn11	9.99397e-35	-1.07342	0.614	0.798	1.8259e-30	seurat_psf_0
Adora2a	1.88272e-34	-1.18449	0.178	0.437	3.43972e-30	seurat_psf_0
Tac1	2.75253e-34	-1.31781	0.519	0.748	5.02887e-30	seurat_psf_0
Gng7	1.03637e-33	-1.07959	0.566	0.741	1.89345e-29	seurat_psf_0
Gpr88	2.87379e-33	-1.77358	0.594	0.77	5.25042e-29	seurat_psf_0
Mbp	1.55381e-30	-1.04499	0.998	1	2.83881e-26	seurat_psf_0
Drd2	2.34575e-30	-1.05083	0.135	0.373	4.28569e-26	seurat_psf_0
Mal	1.61372e-29	-1.05031	0.742	0.868	2.94827e-25	seurat_psf_0
Pde10a	2.60309e-29	-1.52458	0.655	0.804	4.75585e-25	seurat_psf_0
Ppp1r1b	1.41594e-27	-1.62526	0.895	0.897	2.58693e-23	seurat_psf_0
Rasd2	3.16953e-20	-1.05946	0.772	0.839	5.79072e-16	seurat_psf_0
Ttr	2.34743e-15	-2.94676	0.873	0.897	4.28876e-11	seurat_psf_0
Scn4b	2.81442e-11	-1.11534	0.592	0.666	5.14194e-07	seurat_psf_0
Fabp7	3.01211e-10	-1.17461	0.697	0.783	5.50312e-06	seurat_psf_0
Ptgds	5.16177e-09	-1.10373	0.996	0.989	9.43055e-05	seurat_psf_0
Calb2	1.97682e-07	-1.02361	0.455	0.547	0.00361164	seurat_psf_0
Scn4b	1.05132e-29	-1.21416	0.477	0.692	1.92076e-25	seurat_psf_1
Pde10a	7.09259e-18	-1.20028	0.693	0.794	1.29582e-13	seurat_psf_1
Ttr	4.7225e-17	2.23711	0.824	0.908	8.62801e-13	seurat_psf_1
Ppp1r1b	1.83964e-16	-1.25331	0.834	0.912	3.36103e-12	seurat_psf_1
Rgs9	3.46026e-16	-1.051	0.457	0.596	6.32189e-12	seurat_psf_1
Penk	1.62469e-13	-1.06391	0.807	0.881	2.9683e-09	seurat_psf_1
Gpr88	2.59983e-13	-1.27111	0.658	0.753	4.7499e-09	seurat_psf_1
Doc2g	1.83868e-08	1.0638	0.475	0.362	0.000335926	seurat_psf_1
Cdhr1	7.19321e-07	1.08334	0.404	0.317	0.013142	seurat_psf_1
Ptgds	1.50484e-96	1.05117	1	0.989	2.74933e-92	seurat_psf_2
Plekhb1	4.79237e-80	1.28103	0.986	0.903	8.75566e-76	seurat_psf_2
Car2	1.47581e-77	1.10673	0.996	0.952	2.6963e-73	seurat_psf_2
Csrp1	4.05147e-74	1.05039	0.98	0.912	7.40204e-70	seurat_psf_2
Trf	3.09626e-67	1.40957	0.982	0.865	5.65686e-63	seurat_psf_2
Mobp	2.10429e-65	1.54851	0.988	0.918	3.84454e-61	seurat_psf_2
Cnp	1.22171e-62	1.33951	0.992	0.905	2.23206e-58	seurat_psf_2
Cldn11	6.48509e-61	1.31056	0.911	0.728	1.18483e-56	seurat_psf_2
Plp1	8.2527e-60	1.63238	1	0.972	1.50777e-55	seurat_psf_2
Nrgn	1.96019e-57	-1.01123	1	0.998	3.58126e-53	seurat_psf_2
Mal	2.04391e-57	1.40132	0.938	0.821	3.73423e-53	seurat_psf_2
Mag	8.30739e-57	1.28157	0.94	0.788	1.51776e-52	seurat_psf_2
Cryab	1.5494e-56	1.11041	0.986	0.885	2.83075e-52	seurat_psf_2
Mbp	1.11787e-55	1.41492	1	1	2.04235e-51	seurat_psf_2
Tspan2	4.32553e-53	1.16211	0.875	0.675	7.90275e-49	seurat_psf_2
Gatm	6.06352e-53	1.01646	0.867	0.691	1.10781e-48	seurat_psf_2
Qdpr	2.21557e-51	1.10872	0.984	0.96	4.04784e-47	seurat_psf_2
Bcas1	3.2902e-51	1.11048	0.883	0.726	6.0112e-47	seurat_psf_2
Mog	5.07892e-49	1.17889	0.817	0.627	9.27919e-45	seurat_psf_2
Ndrg1	4.65279e-46	1.03161	0.835	0.65	8.50065e-42	seurat_psf_2
Sept4	1.07177e-44	1.0137	0.982	0.91	1.95813e-40	seurat_psf_2
Gpr6	1.56358e-242	1.70657	0.873	0.152	2.85666e-238	seurat_psf_4
Drd2	4.98313e-240	2.1169	0.923	0.216	9.10418e-236	seurat_psf_4
Lrrc10b	1.05694e-225	2.00791	0.928	0.248	1.93103e-221	seurat_psf_4
Ido1	2.19591e-218	1.13514	0.688	0.073	4.01193e-214	seurat_psf_4
Adora2a	4.85443e-218	2.16091	0.938	0.284	8.86904e-214	seurat_psf_4
Drd1	1.73627e-210	1.87556	0.938	0.288	3.17217e-206	seurat_psf_4
Syndig1l	5.20088e-204	2.02614	0.933	0.333	9.50201e-200	seurat_psf_4
Rxrg	6.51246e-204	1.71225	0.918	0.277	1.18983e-199	seurat_psf_4
Rgs9	5.69796e-201	2.48908	0.966	0.496	1.04102e-196	seurat_psf_4
Gpr88	1.8468e-197	2.85258	0.986	0.689	3.3741e-193	seurat_psf_4
Pde10a	2.09749e-197	2.63897	0.988	0.736	3.83212e-193	seurat_psf_4
Cd4	2.86652e-197	1.087	0.674	0.082	5.23714e-193	seurat_psf_4
Nexn	2.32839e-192	1.15316	0.734	0.113	4.25396e-188	seurat_psf_4
Rarb	2.84055e-192	1.39129	0.832	0.187	5.18969e-188	seurat_psf_4
Scn4b	9.33931e-192	2.44378	0.974	0.592	1.70629e-187	seurat_psf_4
Adcy5	2.22372e-190	2.20076	0.993	0.846	4.06273e-186	seurat_psf_4
Ppp1r1b	3.18006e-189	2.74397	0.998	0.878	5.80997e-185	seurat_psf_4
Pde1b	1.30467e-188	2.26872	1	0.946	2.38363e-184	seurat_psf_4
Penk	4.04386e-186	2.66851	0.998	0.843	7.38814e-182	seurat_psf_4
Serpina9	2.75492e-183	1.04397	0.662	0.09	5.03323e-179	seurat_psf_4
Rasd2	7.27848e-183	2.18393	0.986	0.796	1.32978e-178	seurat_psf_4
Gng7	1.89213e-180	1.9337	0.976	0.657	3.45693e-176	seurat_psf_4
Tmem158	4.21561e-178	1.73654	1	0.912	7.70192e-174	seurat_psf_4
Arpp21	1.84497e-175	1.68213	1	0.988	3.37076e-171	seurat_psf_4
Kcnab1	3.63369e-175	1.81828	0.981	0.689	6.63875e-171	seurat_psf_4
Ptpn5	4.45942e-175	1.58919	1	0.94	8.14735e-171	seurat_psf_4
Tac1	2.20692e-172	2.15565	0.986	0.651	4.03204e-168	seurat_psf_4
St8sia3	2.90953e-171	1.58749	0.99	0.884	5.31571e-167	seurat_psf_4
Hpca	1.02264e-168	1.70378	1	0.962	1.86837e-164	seurat_psf_4
Spock3	1.47719e-165	1.64453	0.99	0.809	2.69883e-161	seurat_psf_4
Dmkn	1.40366e-163	1.12533	0.705	0.134	2.56448e-159	seurat_psf_4
Pcp4	2.94108e-163	1.57792	0.998	0.996	5.37335e-159	seurat_psf_4
Ppp3ca	1.25158e-162	1.26234	1	0.999	2.28664e-158	seurat_psf_4
Six3	1.38379e-162	1.09498	0.806	0.176	2.52818e-158	seurat_psf_4
Gnal	7.27475e-159	1.46323	0.99	0.847	1.3291e-154	seurat_psf_4
Rap1gap	1.04944e-158	1.2439	1	0.964	1.91733e-154	seurat_psf_4
Gnas	5.58424e-156	-1.05117	1	1	1.02024e-151	seurat_psf_4
Inf2	1.14622e-155	1.37546	0.986	0.897	2.09415e-151	seurat_psf_4
Ngef	2.32539e-151	1.15831	1	0.975	4.24849e-147	seurat_psf_4
Rasgrp2	1.19114e-150	1.50182	0.95	0.573	2.1762e-146	seurat_psf_4
Stmn1	5.92297e-146	-1.36967	0.998	0.999	1.08213e-141	seurat_psf_4
Olfm1	4.6573e-145	-1.8529	0.993	0.999	8.50888e-141	seurat_psf_4
Elmod1	2.4409e-142	1.10216	0.998	0.979	4.45953e-138	seurat_psf_4
Atp2b1	4.44525e-142	1.03481	1	0.996	8.12148e-138	seurat_psf_4
Slc35d3	7.93697e-142	1.09194	0.712	0.162	1.45008e-137	seurat_psf_4
Strn	1.59463e-140	1.32357	0.959	0.595	2.91339e-136	seurat_psf_4
Pde2a	4.57712e-140	1.0133	1	0.983	8.3624e-136	seurat_psf_4
Ano3	8.84654e-139	1.36303	0.976	0.78	1.61626e-134	seurat_psf_4
Rem2	1.33239e-138	1.05027	0.772	0.209	2.43427e-134	seurat_psf_4
Dgkb	1.34398e-138	1.22835	0.983	0.845	2.45546e-134	seurat_psf_4
Tesc	3.55526e-138	1.23382	0.983	0.88	6.49545e-134	seurat_psf_4
Dach1	1.08984e-136	1.02069	0.679	0.148	1.99113e-132	seurat_psf_4
Cacna2d3	1.95108e-136	1.24921	0.959	0.688	3.56462e-132	seurat_psf_4
Sez6	7.06333e-136	1.15032	1	0.959	1.29047e-131	seurat_psf_4
Kcnip2	1.08347e-135	1.21675	0.995	0.91	1.9795e-131	seurat_psf_4
Necab2	1.8737e-133	1.23105	0.981	0.726	3.42324e-129	seurat_psf_4
Tomm70a	4.97903e-130	1.05665	0.998	0.945	9.0967e-126	seurat_psf_4
Bcl11b	1.60046e-129	1.19272	0.976	0.728	2.92404e-125	seurat_psf_4
Arpp19	3.88264e-129	1.00699	0.998	0.989	7.09358e-125	seurat_psf_4
Ablim2	2.20309e-125	1.15327	0.978	0.852	4.02505e-121	seurat_psf_4
Phactr1	3.38268e-125	1.0121	0.995	0.959	6.18016e-121	seurat_psf_4
Actn2	1.53083e-119	1.11218	0.803	0.296	2.79683e-115	seurat_psf_4
Lingo3	2.69818e-119	1.22923	0.863	0.441	4.92957e-115	seurat_psf_4
Bcr	9.45049e-119	1.04452	0.974	0.783	1.7266e-114	seurat_psf_4
Foxp1	1.76692e-118	1.26154	0.916	0.612	3.22816e-114	seurat_psf_4
Tbc1d8	1.33837e-117	1.10286	0.799	0.308	2.44521e-113	seurat_psf_4
Tgfa	1.02122e-116	1.11105	0.906	0.433	1.86576e-112	seurat_psf_4
Basp1	6.13028e-114	-1.09444	1	0.997	1.12e-109	seurat_psf_4
Smpd3	8.90139e-114	1.19261	0.914	0.615	1.62628e-109	seurat_psf_4
Cyld	1.55741e-113	1.03582	0.959	0.777	2.84539e-109	seurat_psf_4
Ankrd63	2.5827e-113	1.05742	0.878	0.415	4.71859e-109	seurat_psf_4
Strip2	2.82074e-109	1.20322	0.88	0.453	5.15349e-105	seurat_psf_4
Slc17a7	3.76451e-109	-1.9883	0.856	0.942	6.87777e-105	seurat_psf_4
Dlgap1	1.83475e-108	-1.15733	0.794	0.98	3.35209e-104	seurat_psf_4
Cck	7.03645e-108	-2.09551	0.918	0.975	1.28556e-103	seurat_psf_4
Cpne5	7.24229e-108	1.0143	0.978	0.782	1.32317e-103	seurat_psf_4
Foxo1	2.70711e-105	1.0686	0.784	0.315	4.94589e-101	seurat_psf_4
Nrn1	3.56895e-103	-1.66442	0.396	0.85	6.52047e-99	seurat_psf_4
Id4	4.37514e-103	1.01333	0.983	0.777	7.99339e-99	seurat_psf_4
Sh2d5	1.7233e-102	1.01292	0.952	0.723	3.14848e-98	seurat_psf_4
Ncald	2.20486e-102	-1.22521	0.808	0.972	4.02827e-98	seurat_psf_4
Camk2n2	1.19386e-99	-1.08124	0.782	0.963	2.18119e-95	seurat_psf_4
Caln1	3.10608e-99	1.01169	0.909	0.616	5.67481e-95	seurat_psf_4
Klhl13	7.02606e-99	1.01979	0.885	0.466	1.28366e-94	seurat_psf_4
Ube2ql1	1.24601e-98	-1.03591	0.851	0.978	2.27646e-94	seurat_psf_4
Shank1	1.36223e-98	-1.11401	0.436	0.883	2.4888e-94	seurat_psf_4
Slc8a1	1.38634e-97	-1.11844	0.484	0.9	2.53284e-93	seurat_psf_4
Vsnl1	1.09474e-96	-1.27393	0.976	0.986	2.0001e-92	seurat_psf_4
Efhd2	1.03772e-90	-1.14438	0.791	0.966	1.89592e-86	seurat_psf_4
Gpr83	5.49174e-90	1.06743	0.791	0.359	1.00334e-85	seurat_psf_4
Coch	1.26117e-88	1.02752	0.794	0.361	2.30415e-84	seurat_psf_4
Serpini1	7.50789e-88	-1.09125	0.83	0.982	1.37169e-83	seurat_psf_4
Ppm1e	4.97454e-87	-1.15853	0.566	0.914	9.08848e-83	seurat_psf_4
Syt13	6.43463e-86	-1.07145	0.628	0.92	1.17561e-81	seurat_psf_4
Nptxr	1.97921e-83	-1.4773	0.859	0.967	3.61602e-79	seurat_psf_4
Pdyn	2.61484e-82	1.1625	0.842	0.438	4.77731e-78	seurat_psf_4
Car10	1.17527e-81	-1.06814	0.211	0.716	2.14722e-77	seurat_psf_4
Rtn4r	7.83946e-81	-1.18875	0.185	0.687	1.43227e-76	seurat_psf_4
Calb1	3.14891e-80	1.09719	0.957	0.749	5.75306e-76	seurat_psf_4
Tbr1	5.07143e-79	-1.27726	0.194	0.691	9.2655e-75	seurat_psf_4
Stx1a	2.43777e-77	-1.29129	0.717	0.907	4.4538e-73	seurat_psf_4
Slc30a3	2.71649e-77	-1.41282	0.218	0.701	4.96302e-73	seurat_psf_4
Gpr155	7.60337e-74	1.00883	0.842	0.525	1.38914e-69	seurat_psf_4
Nptx1	2.57558e-65	-1.11497	0.52	0.851	4.70558e-61	seurat_psf_4
Vxn	1.26199e-64	-1.5325	0.477	0.803	2.30565e-60	seurat_psf_4
Mical2	1.6385e-56	-1.03451	0.523	0.804	2.99354e-52	seurat_psf_4
Nrip3	2.36743e-52	-1.02367	0.463	0.801	4.32529e-48	seurat_psf_4
Ccn3	7.91417e-52	-1.00805	0.18	0.577	1.44592e-47	seurat_psf_4
Lingo1	5.45156e-51	-1.03314	0.885	0.932	9.96e-47	seurat_psf_4
Gng4	1.34336e-48	-1.43094	0.384	0.732	2.45431e-44	seurat_psf_4
Cpne6	6.48809e-47	-1.01728	0.667	0.899	1.18537e-42	seurat_psf_4
Calb2	8.54656e-40	-1.60654	0.254	0.579	1.56146e-35	seurat_psf_4
Fabp7	2.15389e-29	-1.35014	0.609	0.794	3.93516e-25	seurat_psf_4
Doc2g	2.43313e-20	-1.24392	0.201	0.417	4.44533e-16	seurat_psf_4
Cdhr1	7.83641e-17	-1.09303	0.177	0.362	1.43171e-12	seurat_psf_4
Ptgds	2.25247e-10	-1.29251	0.99	0.991	4.11526e-06	seurat_psf_4
S100a5	2.95609e-09	-1.16129	0.072	0.188	5.40078e-05	seurat_psf_4
Adamts19	2.06695e-189	1.25834	0.708	0.037	3.77631e-185	seurat_psf_5
Vipr2	1.25109e-138	1.31314	0.708	0.06	2.28574e-134	seurat_psf_5
Rhcg	9.81337e-138	1.5264	0.775	0.079	1.7929e-133	seurat_psf_5
Sp8	9.79084e-122	1.74994	0.908	0.141	1.78879e-117	seurat_psf_5
Sp7	1.23263e-121	1.19736	0.742	0.08	2.25201e-117	seurat_psf_5
Ctxn3	3.568e-120	1.55439	0.783	0.096	6.51874e-116	seurat_psf_5
Lgr6	3.53499e-114	1.63825	0.792	0.106	6.45843e-110	seurat_psf_5
Igfbpl1	5.06366e-111	1.25251	0.642	0.062	9.2513e-107	seurat_psf_5
[truncated: 4,002 more rows]

## Sheet: ORA res
pathway	pval	padj	overlap	size	overlapGenes	cluster
Calcium_signaling_pathway	3.02521e-06	0.000121008	9	168	Pde1a, Pde1b, Slc8a1, Ppp3ca, Adora2a, Drd1, Gnal, Gnas, Atp2b1	seurat_exp_0
cAMP_signaling_pathway	4.36959e-05	0.000873917	8	181	Drd2, Gnas, Adcy5, Atp2b1, Adora2a, Drd1, Pde10a, Ppp1r1b	seurat_exp_0
Rap1_signaling_pathway	0.000430954	0.00574606	7	192	Rap1gap, Adora2a, Gnas, Rasgrp2, Adcy5, Cnr1, Drd2	seurat_exp_0
cGMP_PKG_signaling_pathway	0.000712283	0.00678738	6	151	Ppp3ca, Mef2c, Slc8a1, Atp2b1, Adcy5, Pde2a	seurat_exp_0
MAPK_signaling_pathway	0.000848422	0.00678738	8	280	Rasgrf2, Ptpn5, Stmn1, Rasgrp2, Cacna2d3, Mef2c, Ppp3ca, Tgfa	seurat_exp_0
Ras_signaling_pathway	0.0035308	0.0235387	6	207	Tgfa, Rasgrp2, Rasgrf2, Gnb5, Gng4, Gng7	seurat_exp_0
Chemokine_signaling_pathway	0.00501483	0.0286562	5	156	Gnb5, Gng4, Gng7, Adcy5, Rasgrp2	seurat_exp_0
cAMP_signaling_pathway	0.000270497	0.0108199	5	181	Drd2, Adcy1, Adcy5, Adora2a, Pde10a	seurat_exp_1
Chemokine_signaling_pathway	0.00151656	0.0265169	4	156	Gng4, Gng7, Adcy1, Adcy5	seurat_exp_1
Calcium_signaling_pathway	0.00198877	0.0265169	4	168	Adcy1, Pde1a, Pde1b, Adora2a	seurat_exp_1
Rap1_signaling_pathway	0.00322177	0.0322177	4	192	Adora2a, Adcy1, Adcy5, Drd2	seurat_exp_1
cAMP_signaling_pathway	1.824e-06	7.29599e-05	8	181	Atp1a1, Drd2, Adcy5, Camk2a, Adora2a, Drd1, Pde10a, Ppp1r1b	seurat_exp_4
Calcium_signaling_pathway	0.00106473	0.0212947	5	168	Itpka, Pde1b, Camk2a, Adora2a, Drd1	seurat_exp_4
Calcium_signaling_pathway	7.8159e-10	3.12636e-08	13	168	Itpka, Adcy1, Pde1a, Pde1b, Camk2a, Ppp3ca, Ppp3r1, Prkcb, Prkcg, Itpr1, Adora2a, Drd1, Gnal	seurat_exp_5
cAMP_signaling_pathway	9.51074e-05	0.00190215	8	181	Drd2, Adcy1, Adcy5, Camk2a, Adora2a, Drd1, Pde10a, Ppp1r1b	seurat_exp_5
Rap1_signaling_pathway	0.000143111	0.00190815	8	192	Igf1, Adora2a, Adcy1, Adcy5, Cnr1, Drd2, Prkcb, Prkcg	seurat_exp_5
VEGF_signaling_pathway	0.000924137	0.00744523	4	55	Ppp3ca, Ppp3r1, Prkcb, Prkcg	seurat_exp_5
HIF_1_signaling_pathway	0.000930653	0.00744523	5	95	Igf1, Prkcb, Prkcg, Camk2a, Trf	seurat_exp_5
Wnt_signaling_pathway	0.00420139	0.0280093	5	134	Prkcb, Prkcg, Ppp3ca, Ppp3r1, Camk2a	seurat_exp_5
MAPK_signaling_pathway	0.00682518	0.0346324	7	280	Ptpn5, Prkcb, Prkcg, Cacng5, Ppp3ca, Ppp3r1, Igf1	seurat_exp_5
cGMP_PKG_signaling_pathway	0.00692648	0.0346324	5	151	Itpr1, Ppp3ca, Ppp3r1, Adcy1, Adcy5	seurat_exp_5
Chemokine_signaling_pathway	0.0079195	0.0351978	5	156	Gng4, Gng7, Adcy1, Adcy5, Prkcb	seurat_exp_5
cAMP_signaling_pathway	5.724e-05	0.0022896	6	181	Drd2, Adcy5, Adora2a, Drd1, Pde10a, Ppp1r1b	seurat_exp_6
cAMP_signaling_pathway	0.00019275	0.00771001	5	181	Drd2, Adcy5, Adora2a, Pde10a, Ppp1r1b	seurat_exp_7
Calcium_signaling_pathway	4.35135e-05	0.00174054	7	168	Itpka, Adcy1, Camk2a, Camk2d, Itpr1, Htr2c, Atp2b4	seurat_exp_8
cGMP_PKG_signaling_pathway	0.00157951	0.0315903	5	151	Itpr1, Mef2c, Atp2b4, Myh7, Adcy1	seurat_exp_8
cAMP_signaling_pathway	2.53644e-05	0.00101458	6	181	Drd2, Adcy5, Adora2a, Drd1, Pde10a, Ppp1r1b	seurat_exp_9
Calcium_signaling_pathway	0.00211831	0.0423661	4	168	Pde1b, Adora2a, Drd1, Gnal	seurat_exp_9
cAMP_signaling_pathway	3.14317e-08	1.25727e-06	17	181	Cacna1c, Drd2, Gabbr2, Adcy1, Adcy5, Map2k1, Mapk10, Camk2b, Adcyap1r1, Adora2a, Drd1, Vipr2, Pde10a, Npy, Ppp1r1b, Ppp1cc, Tiam1	seurat_exp_11
Calcium_signaling_pathway	3.96819e-07	7.93637e-06	15	168	Itpka, Adcy1, Pde1a, Slc8a1, Camk2b, Ppp3ca, Ppp3cc, Prkca, Prkcb, Itpr1, Cacna1c, Adora2a, Drd1, Gnal, Cacna1g	seurat_exp_11
MAPK_signaling_pathway	3.50637e-06	4.67516e-05	18	280	Dusp5, Ptpn5, Map2k1, Rasa1, Prkca, Prkcb, Rasa2, Grb2, Cacng5, Cacna2d3, Cacna1c, Cacnb3, Cacna1g, Mapk10, Hspa2, Ppp3ca, Ppp3cc, Map3k1	seurat_exp_11
Ras_signaling_pathway	0.000101328	0.000910045	13	207	Map2k1, Grb2, Tiam1, Prkca, Prkcb, Abl2, Mapk10, Rasa3, Rasa1, Rasa2, Gng4, Gng7, Gng13	seurat_exp_11
ErbB_signaling_pathway	0.000113756	0.000910045	8	82	Grb2, Cdkn1a, Mapk10, Prkca, Prkcb, Camk2b, Abl2, Map2k1	seurat_exp_11
Rap1_signaling_pathway	0.000742337	0.00494891	11	192	Map2k1, Sipa1l1, Rap1gap, Adora2a, Tiam1, Adcy1, Adcy5, Cnr1, Drd2, Prkca, Prkcb	seurat_exp_11
cGMP_PKG_signaling_pathway	0.00168462	0.00962642	9	151	Ppp1cc, Itpr1, Cacna1c, Ppp3ca, Ppp3cc, Map2k1, Slc8a1, Adcy1, Adcy5	seurat_exp_11
Chemokine_signaling_pathway	0.00210618	0.0105309	9	156	Gng4, Gng7, Gng13, Grb2, Adcy1, Adcy5, Prkcb, Tiam1, Map2k1	seurat_exp_11
Wnt_signaling_pathway	0.00297594	0.0122345	8	134	Prkca, Prkcb, Ppp3ca, Ppp3cc, Camk2b, Mapk10, Apc, Bambi	seurat_exp_11
VEGF_signaling_pathway	0.00305863	0.0122345	5	55	Ppp3ca, Ppp3cc, Prkca, Prkcb, Map2k1	seurat_exp_11
Fc_epsilon_RI_signaling_pathway	0.0038564	0.0140233	5	58	Fyn, Prkca, Map2k1, Grb2, Mapk10	seurat_exp_11
Endocrine_resistance	0.00571745	0.0190582	6	90	Map2k1, Grb2, Adcy1, Adcy5, Mapk10, Cdkn1a	seurat_exp_11
B_cell_receptor_signaling_pathway	0.00758686	0.0233442	5	68	Prkcb, Ppp3ca, Ppp3cc, Map2k1, Grb2	seurat_exp_11
Calcium_signaling_pathway	0.00124654	0.0498615	5	168	Itpka, Camk2a, Ppp3ca, Ptk2b, Pln	seurat_exp_12
cAMP_signaling_pathway	0.000501653	0.0200661	11	181	Atp1a3, Prkacb, Calm2, Calml4, Atp2b2, Camk2a, Sox9, Npy, Grin1, Fxyd1, Pak1	seurat_exp_13
Ras_signaling_pathway	0.00150651	0.0301302	11	207	Igf2, Prkcb, Plaat3, Rasgrf1, Grin1, Calm2, Calml4, Gng3, Gng4, Pak1, Prkacb	seurat_exp_13
Calcium_signaling_pathway	0.0037498	0.0499973	9	168	Itpkb, Camk2a, Prkcb, Grin1, Htr2c, Calm2, Calml4, Prkacb, Atp2b2	seurat_exp_13
Calcium_signaling_pathway	3.52055e-08	1.40822e-06	13	168	Pde1b, Slc8a1, Camk2a, Camk2d, Ppp3r1, Prkca, Prkcg, Ptk2b, Grin2a, Orai2, Prkacb, Atp2b4, Stim2	seurat_exp_14
Fc_gamma_R_mediated_phagocytosis	4.49788e-07	8.99577e-06	9	88	Prkcd, Wasf1, Arpc5, Arpc2, Marcks, Marcksl1, Amph, Prkca, Prkcg	seurat_exp_14
Wnt_signaling_pathway	0.000103622	0.00138163	8	134	Prkca, Prkcg, Ppp3r1, Camk2a, Camk2d, Prickle2, Ccnd2, Prkacb	seurat_exp_14
cAMP_signaling_pathway	0.000156432	0.00156432	9	181	Adora1, Prkacb, Atp2b4, Camk2a, Camk2d, Npy, Gria1, Grin2a, Tiam1	seurat_exp_14
Rap1_signaling_pathway	0.00024324	0.00194592	9	192	Fgfr1, Dock4, Tiam1, Rapgef5, Sipa1l3, Grin2a, Prkca, Prkcg, Rgs14	seurat_exp_14
MAPK_signaling_pathway	0.00095035	0.00633567	10	280	Dusp5, Stmn1, Prkca, Prkcg, Prkacb, Rasgrp1, Fgfr1, Mef2c, Tgfb2, Ppp3r1	seurat_exp_14
Ras_signaling_pathway	0.00186398	0.0106513	8	207	Fgfr1, Tiam1, Prkca, Prkcg, Rasgrp1, Rapgef5, Grin2a, Prkacb	seurat_exp_14
TGF_beta_signaling_pathway	0.00919648	0.0459824	4	76	Id2, Lefty1, Tgfb2, Nbl1	seurat_exp_14
cAMP_signaling_pathway	8.84183e-06	0.000353673	5	181	Drd2, Adcy5, Adora2a, Pde10a, Ppp1r1b	seurat_psf_0
Calcium_signaling_pathway	1.26028e-05	0.000432403	8	168	Pde1b, Slc8a1, Ppp3ca, Adora2a, Drd1, Gnal, Gnas, Atp2b1	seurat_psf_4
cAMP_signaling_pathway	2.16202e-05	0.000432403	8	181	Drd2, Gnas, Adcy5, Atp2b1, Adora2a, Drd1, Pde10a, Ppp1r1b	seurat_psf_4
Rap1_signaling_pathway	0.00148425	0.01979	6	192	Rap1gap, Adora2a, Gnas, Rasgrp2, Adcy5, Drd2	seurat_psf_4
cGMP_PKG_signaling_pathway	0.0028791	0.028791	5	151	Ppp3ca, Slc8a1, Atp2b1, Adcy5, Pde2a	seurat_psf_4
cAMP_signaling_pathway	1.4476e-07	5.79039e-06	15	181	Cacna1c, Drd2, Gabbr2, Adcy1, Adcy5, Map2k1, Mapk10, Camk2b, Adcyap1r1, Adora2a, Vipr2, Pde10a, Ppp1r1b, Ppp1cc, Tiam1	seurat_psf_5
Calcium_signaling_pathway	6.18468e-05	0.00121915	11	168	Itpka, Adcy1, Slc8a1, Camk2b, Ppp3cc, Prkca, Itpr1, Cacna1c, Adora2a, Gnal, Cacna1g	seurat_psf_5
Ras_signaling_pathway	9.37001e-05	0.00121915	12	207	Map2k1, Grb2, Tiam1, Prkca, Abl2, Mapk10, Rasa3, Rasa1, Rasa2, Gng4, Gng7, Gng13	seurat_psf_5
MAPK_signaling_pathway	0.000121915	0.00121915	14	280	Ptpn5, Map2k1, Rasa1, Prkca, Rasa2, Grb2, Cacng5, Cacna1c, Cacnb3, Cacna1g, Mapk10, Hspa2, Ppp3cc, Map3k1	seurat_psf_5
ErbB_signaling_pathway	0.000274351	0.0021948	7	82	Grb2, Cdkn1a, Mapk10, Prkca, Camk2b, Abl2, Map2k1	seurat_psf_5
cGMP_PKG_signaling_pathway	0.00242201	0.013512	8	151	Ppp1cc, Itpr1, Cacna1c, Ppp3cc, Map2k1, Slc8a1, Adcy1, Adcy5	seurat_psf_5
Endocrine_resistance	0.00270189	0.013512	6	90	Map2k1, Grb2, Adcy1, Adcy5, Mapk10, Cdkn1a	seurat_psf_5
Chemokine_signaling_pathway	0.00296156	0.013512	8	156	Gng4, Gng7, Gng13, Grb2, Adcy1, Adcy5, Tiam1, Map2k1	seurat_psf_5
Rap1_signaling_pathway	0.00304019	0.013512	9	192	Map2k1, Rap1gap, Adora2a, Tiam1, Adcy1, Adcy5, Cnr1, Drd2, Prkca	seurat_psf_5
Fc_epsilon_RI_signaling_pathway	0.0122755	0.0491019	4	58	Prkca, Map2k1, Grb2, Mapk10	seurat_psf_5
Calcium_signaling_pathway	4.8751e-06	0.000195004	10	168	Itpka, Camk2a, Ppp3ca, Ppp3r1, Prkcg, Erbb3, Itpr1, Ednrb, Calm2, Drd1	seurat_psf_7
cGMP_PKG_signaling_pathway	0.000615267	0.0123053	7	151	Itpr1, Ednrb, Ppp3ca, Ppp3r1, Atp1a2, Atp1b2, Calm2	seurat_psf_7
cAMP_signaling_pathway	0.0017669	0.0225932	7	181	Atp1a2, Atp1b2, Calm2, Camk2a, Drd1, Npy, Fxyd1	seurat_psf_7
PPAR_signaling_pathway	0.00225932	0.0225932	4	58	Slc27a1, Fabp7, Hmgcs2, Dbi	seurat_psf_7
cAMP_signaling_pathway	1.11803e-05	0.000447212	7	181	Drd2, Adcy1, Adcy5, Adora2a, Drd1, Pde10a, Ppp1r1b	spatialGE_exp_1
Calcium_signaling_pathway	0.00071746	0.0143492	5	168	Adcy1, Pde1a, Pde1b, Adora2a, Drd1	spatialGE_exp_1
cAMP_signaling_pathway	9.09383e-06	0.000363753	9	181	Drd2, Htr1b, Gnas, Adcy5, Atp2b1, Adora2a, Drd1, Pde10a, Ppp1r1b	spatialGE_exp_2
Calcium_signaling_pathway	3.95463e-05	0.000790926	8	168	Pde1b, Slc8a1, Ppp3ca, Adora2a, Drd1, Gnal, Gnas, Atp2b1	spatialGE_exp_2
Rap1_signaling_pathway	0.00328387	0.0437849	6	192	Rap1gap, Adora2a, Gnas, Rasgrp2, Adcy5, Drd2	spatialGE_exp_2
cAMP_signaling_pathway	1.03182e-06	4.12729e-05	8	181	Atp1a1, Drd2, Adcy5, Camk2a, Adora2a, Drd1, Pde10a, Ppp1r1b	spatialGE_exp_4
cAMP_signaling_pathway	0.000136835	0.00547341	4	181	Atp1a2, Drd2, Adora2a, Drd1	spatialGE_exp_5
PI3K_Akt_signaling_pathway	0.00101119	0.0202238	4	307	Igf2, Col1a2, Fn1, Vtn	spatialGE_exp_5
Calcium_signaling_pathway	0.00189935	0.0253246	3	168	Ppp3ca, Adora2a, Drd1	spatialGE_exp_5
Calcium_signaling_pathway	1.40749e-09	5.62997e-08	13	168	Itpka, Adcy1, Pde1a, Pde1b, Camk2a, Ppp3ca, Ppp3r1, Prkcb, Prkcg, Itpr1, Adora2a, Drd1, Gnal	spatialGE_exp_6
cAMP_signaling_pathway	1.98898e-05	0.000397797	9	181	Drd2, Gabbr2, Adcy1, Adcy5, Camk2a, Adora2a, Drd1, Pde10a, Ppp1r1b	spatialGE_exp_6
Rap1_signaling_pathway	0.0010964	0.011023	7	192	Adora2a, Adcy1, Adcy5, Cnr1, Drd2, Prkcb, Prkcg	spatialGE_exp_6
VEGF_signaling_pathway	0.0011023	0.011023	4	55	Ppp3ca, Ppp3r1, Prkcb, Prkcg	spatialGE_exp_6
Wnt_signaling_pathway	0.00513222	0.0410577	5	134	Prkcb, Prkcg, Ppp3ca, Ppp3r1, Camk2a	spatialGE_exp_6
C_type_lectin_receptor_signaling_pathway	0.00798157	0.042087	4	95	Ppp3ca, Ppp3r1, Itpr1, Egr3	spatialGE_exp_6
HIF_1_signaling_pathway	0.00798157	0.042087	4	95	Prkcb, Prkcg, Camk2a, Trf	spatialGE_exp_6
cGMP_PKG_signaling_pathway	0.00841739	0.042087	5	151	Itpr1, Ppp3ca, Ppp3r1, Adcy1, Adcy5	spatialGE_exp_6
Chemokine_signaling_pathway	0.00960961	0.0427094	5	156	Gng4, Gng7, Adcy1, Adcy5, Prkcb	spatialGE_exp_6
cAMP_signaling_pathway	3.91634e-08	1.56654e-06	17	181	Cacna1c, Drd2, Gabbr2, Adcy1, Adcy5, Map2k1, Mapk10, Camk2b, Adcyap1r1, Adora2a, Drd1, Vipr2, Pde10a, Npy, Ppp1r1b, Ppp1cc, Tiam1	spatialGE_exp_7
Calcium_signaling_pathway	4.80592e-07	9.61184e-06	15	168	Itpka, Adcy1, Pde1a, Nos1, Camk2b, Ppp3ca, Ppp3cc, Prkca, Prkcb, Itpr1, Cacna1c, Adora2a, Drd1, Gnal, Cacna1g	spatialGE_exp_7
MAPK_signaling_pathway	4.32653e-06	5.7687e-05	18	280	Dusp5, Ptpn5, Map2k1, Rasa1, Prkca, Prkcb, Rasa2, Grb2, Cacng5, Cacna2d3, Cacna1c, Cacnb3, Cacna1g, Mapk10, Hspa2, Ppp3ca, Ppp3cc, Map3k1	spatialGE_exp_7
Ras_signaling_pathway	0.000117768	0.00100971	13	207	Map2k1, Grb2, Tiam1, Prkca, Prkcb, Abl2, Mapk10, Rasa3, Rasa1, Rasa2, Gng4, Gng7, Gng13	spatialGE_exp_7
ErbB_signaling_pathway	0.000126214	0.00100971	8	82	Grb2, Cdkn1a, Mapk10, Prkca, Prkcb, Camk2b, Abl2, Map2k1	spatialGE_exp_7
Rap1_signaling_pathway	0.000839735	0.00559823	11	192	Map2k1, Sipa1l1, Rap1gap, Adora2a, Tiam1, Adcy1, Adcy5, Cnr1, Drd2, Prkca, Prkcb	spatialGE_exp_7
Chemokine_signaling_pathway	0.0023313	0.0133217	9	156	Gng4, Gng7, Gng13, Grb2, Adcy1, Adcy5, Prkcb, Tiam1, Map2k1	spatialGE_exp_7
Wnt_signaling_pathway	0.00326157	0.0145004	8	134	Prkca, Prkcb, Ppp3ca, Ppp3cc, Camk2b, Mapk10, Apc, Bambi	spatialGE_exp_7
VEGF_signaling_pathway	0.00326258	0.0145004	5	55	Ppp3ca, Ppp3cc, Prkca, Prkcb, Map2k1	spatialGE_exp_7
Fc_epsilon_RI_signaling_pathway	0.00411083	0.0164433	5	58	Fyn, Prkca, Map2k1, Grb2, Mapk10	spatialGE_exp_7
Endocrine_resistance	0.00614276	0.022228	6	90	Map2k1, Grb2, Adcy1, Adcy5, Mapk10, Cdkn1a	spatialGE_exp_7
cGMP_PKG_signaling_pathway	0.0066684	0.022228	8	151	Ppp1cc, Itpr1, Cacna1c, Ppp3ca, Ppp3cc, Map2k1, Adcy1, Adcy5	spatialGE_exp_7
B_cell_receptor_signaling_pathway	0.00806973	0.0248299	5	68	Prkcb, Ppp3ca, Ppp3cc, Map2k1, Grb2	spatialGE_exp_7
Calcium_signaling_pathway	0.00118991	0.0348061	6	168	Adcy1, Camk2a, Camk2d, Itpr1, Htr2c, Atp2b4	spatialGE_exp_8
cAMP_signaling_pathway	0.0017403	0.0348061	6	181	Adcy1, Atp2b4, Camk2a, Camk2d, Grin3a, Ppp1r1b	spatialGE_exp_8
cAMP_signaling_pathway	0.000288908	0.0115563	6	181	Drd2, Adcy5, Camk2d, Adora2a, Npy, Tiam1	spatialGE_exp_9
cAMP_signaling_pathway	6.10798e-06	0.000244319	5	181	Drd2, Adcy5, Adora2a, Pde10a, Ppp1r1b	spatialGE_psf_1
cAMP_signaling_pathway	5.9284e-05	0.00237136	4	181	Adcy5, Adora2a, Pde10a, Ppp1r1b	spatialGE_psf_3
cAMP_signaling_pathway	0.000107093	0.00326693	6	181	Drd2, Adcy5, Adora2a, Drd1, Pde10a, Ppp1r1b	spatialGE_psf_6
MAPK_signaling_pathway	0.000163347	0.00326693	7	280	Ptpn5, Stmn1, Rasgrp2, Cacna2d3, Mef2c, Ppp3ca, Tgfa	spatialGE_psf_6
Calcium_signaling_pathway	0.000675833	0.00901111	5	168	Pde1b, Ppp3ca, Adora2a, Drd1, Gnal	spatialGE_psf_6
Rap1_signaling_pathway	0.00122908	0.0122908	5	192	Rap1gap, Adora2a, Rasgrp2, Adcy5, Drd2	spatialGE_psf_6
Chemokine_signaling_pathway	0.00407413	0.032593	4	156	Gng4, Gng7, Adcy5, Rasgrp2	spatialGE_psf_6
cAMP_signaling_pathway	3.76415e-07	1.50566e-05	13	181	Cacna1c, Drd2, Gabbr2, Adcy1, Adcy5, Mapk10, Adcyap1r1, Adora2a, Vipr2, Pde10a, Ppp1r1b, Ppp1cc, Tiam1	spatialGE_psf_7
Calcium_signaling_pathway	1.13035e-06	2.26071e-05	12	168	Itpka, Adcy1, Pde1a, Ppp3ca, Ppp3cc, Prkca, Prkcb, Itpr1, Cacna1c, Adora2a, Gnal, Cacna1g	spatialGE_psf_7
MAPK_signaling_pathway	9.79918e-06	9.83823e-05	14	280	Ptpn5, Rasa1, Prkca, Prkcb, Rasa2, Grb2, Cacng5, Cacna1c, Cacnb3, Cacna1g, Mapk10, Ppp3ca, Ppp3cc, Map3k1	spatialGE_psf_7
Ras_signaling_pathway	9.83823e-06	9.83823e-05	12	207	Grb2, Tiam1, Prkca, Prkcb, Abl2, Mapk10, Rasa3, Rasa1, Rasa2, Gng4, Gng7, Gng13	spatialGE_psf_7
ErbB_signaling_pathway	0.000511952	0.00394974	6	82	Grb2, Cdkn1a, Mapk10, Prkca, Prkcb, Abl2	spatialGE_psf_7
Rap1_signaling_pathway	0.000620757	0.00394974	9	192	Rap1gap, Adora2a, Tiam1, Adcy1, Adcy5, Cnr1, Drd2, Prkca, Prkcb	spatialGE_psf_7
Chemokine_signaling_pathway	0.000691205	0.00394974	8	156	Gng4, Gng7, Gng13, Grb2, Adcy1, Adcy5, Prkcb, Tiam1	spatialGE_psf_7
cGMP_PKG_signaling_pathway	0.00263537	0.0131768	7	151	Ppp1cc, Itpr1, Cacna1c, Ppp3ca, Ppp3cc, Adcy1, Adcy5	spatialGE_psf_7
VEGF_signaling_pathway	0.00460134	0.0200284	4	55	Ppp3ca, Ppp3cc, Prkca, Prkcb	spatialGE_psf_7
Endocrine_resistance	0.00500709	0.0200284	5	90	Grb2, Adcy1, Adcy5, Mapk10, Cdkn1a	spatialGE_psf_7
Wnt_signaling_pathway	0.00621295	0.0225925	6	134	Prkca, Prkcb, Ppp3ca, Ppp3cc, Mapk10, Apc	spatialGE_psf_7
B_cell_receptor_signaling_pathway	0.00971486	0.0323829	4	68	Prkcb, Ppp3ca, Ppp3cc, Grb2	spatialGE_psf_7
cAMP_signaling_pathway	8.54584e-05	0.00341834	6	181	Drd2, Adcy5, Adora2a, Drd1, Pde10a, Ppp1r1b	spatialGE_psf_9
Calcium_signaling_pathway	0.000561749	0.011235	5	168	Pde1b, Slc8a1, Adora2a, Drd1, Gnal	spatialGE_psf_9
Rap1_signaling_pathway	0.00102489	0.0136652	5	192	Rap1gap, Adora2a, Rasgrp2, Adcy5, Drd2	spatialGE_psf_9
Chemokine_signaling_pathway	0.00352506	0.0352506	4	156	Gng4, Gng7, Adcy5, Rasgrp2	spatialGE_psf_9
MAPK_signaling_pathway	0.00524576	0.041966	5	280	Ptpn5, Stmn1, Rasgrp2, Cacna2d3, Mef2c	spatialGE_psf_9
Calcium_signaling_pathway	0.000424865	0.0169946	7	168	Itpka, Ppp3ca, Ppp3r1, Prkcg, Itpr1, Ednrb, Drd1	spatialGE_psf_11
PPAR_signaling_pathway	0.00121834	0.0186941	4	58	Slc27a1, Fabp7, Hmgcs2, Dbi	spatialGE_psf_11
cGMP_PKG_signaling_pathway	0.00140206	0.0186941	6	151	Itpr1, Ednrb, Ppp3ca, Ppp3r1, Atp1a2, Atp1b2	spatialGE_psf_11
cAMP_signaling_pathway	0.00347766	0.0347766	6	181	Atp1a2, Atp1b2, Drd2, Drd1, Npy, Ppp1r1b	spatialGE_psf_11
Calcium_signaling_pathway	2.3983e-07	9.59322e-06	11	168	Itpka, Adcy1, Pde1a, Pde1b, Ppp3ca, Prkca, Prkcb, Itpr1, Adora2a, Drd1, Gnal	vesalius_exp_2
cAMP_signaling_pathway	0.000180888	0.00361776	8	181	Drd2, Gabbr2, Adcy1, Adcy5, Adora2a, Drd1, Pde10a, Ppp1r1b	vesalius_exp_2
Rap1_signaling_pathway	0.00142518	0.0190025	7	192	Adora2a, Adcy1, Adcy5, Cnr1, Drd2, Prkca, Prkcb	vesalius_exp_2
cAMP_signaling_pathway	2.34532e-07	9.38127e-06	7	181	Drd2, Adcy5, Camk2a, Adora2a, Drd1, Pde10a, Ppp1r1b	vesalius_exp_3
Calcium_signaling_pathway	0.000703017	0.0140603	4	168	Pde1b, Camk2a, Adora2a, Drd1	vesalius_exp_3
Calcium_signaling_pathway	0.000322892	0.00960303	6	168	Pde1b, Slc8a1, Ppp3ca, Adora2a, Drd1, Gnal	vesalius_exp_5
cAMP_signaling_pathway	0.000480152	0.00960303	6	181	Drd2, Adcy5, Adora2a, Drd1, Pde10a, Ppp1r1b	vesalius_exp_5
MAPK_signaling_pathway	0.000876129	0.0116817	7	280	Ptpn5, Stmn1, Rasgrp2, Cacna2d3, Mef2c, Ppp3ca, Tgfa	vesalius_exp_5
Rap1_signaling_pathway	0.00409297	0.0409297	5	192	Rap1gap, Adora2a, Rasgrp2, Adcy5, Drd2	vesalius_exp_5
cAMP_signaling_pathway	1.0825e-05	0.000432999	6	181	Drd2, Adcy5, Adora2a, Drd1, Pde10a, Ppp1r1b	vesalius_exp_6
cAMP_signaling_pathway	1.45187e-06	5.80747e-05	7	181	Drd2, Adcy1, Adcy5, Adora2a, Drd1, Pde10a, Ppp1r1b	vesalius_exp_8
Chemokine_signaling_pathway	0.00142131	0.0248642	4	156	Gng4, Gng7, Adcy1, Adcy5	vesalius_exp_8
Calcium_signaling_pathway	0.00186482	0.0248642	4	168	Adcy1, Pde1b, Adora2a, Drd1	vesalius_exp_8
Rap1_signaling_pathway	0.00302405	0.0302405	4	192	Adora2a, Adcy1, Adcy5, Drd2	vesalius_exp_8
cAMP_signaling_pathway	6.21808e-05	0.00248723	6	181	Drd2, Adcy5, Adora2a, Drd1, Pde10a, Ppp1r1b	vesalius_exp_10
Calcium_signaling_pathway	0.000432898	0.00865797	5	168	Pde1b, Tnnc1, Adora2a, Drd1, Gnal	vesalius_exp_10
Calcium_signaling_pathway	4.5423e-07	1.81692e-05	9	168	Itpka, Adcy1, Pde1b, Ppp3ca, Ppp3r1, Prkcb, Itpr1, Drd1, Gnal	vesalius_psf_2
cAMP_signaling_pathway	0.000562043	0.0112409	6	181	Drd2, Adcy1, Adcy5, Drd1, Pde10a, Ppp1r1b	vesalius_psf_2
cGMP_PKG_signaling_pathway	0.00164921	0.0190265	5	151	Itpr1, Ppp3ca, Ppp3r1, Adcy1, Adcy5	vesalius_psf_2
Chemokine_signaling_pathway	0.00190265	0.0190265	5	156	Gng4, Gng7, Adcy1, Adcy5, Prkcb	vesalius_psf_2
VEGF_signaling_pathway	0.003691	0.029528	3	55	Ppp3ca, Ppp3r1, Prkcb	vesalius_psf_2
Rap1_signaling_pathway	0.00464093	0.0309395	5	192	Adcy1, Adcy5, Cnr1, Drd2, Prkcb	vesalius_psf_2
B_cell_receptor_signaling_pathway	0.0066886	0.0382205	3	68	Prkcb, Ppp3ca, Ppp3r1	vesalius_psf_2
cAMP_signaling_pathway	0.000120959	0.00483835	5	181	Drd2, Adcy5, Adora2a, Pde10a, Ppp1r1b	vesalius_psf_3
cAMP_signaling_pathway	5.00483e-08	2.00193e-06	15	181	Cacna1c, Drd2, Gabbr2, Adcy1, Adcy5, Mapk10, Adcyap1r1, Adora2a, Drd1, Vipr2, Pde10a, Npy, Ppp1r1b, Ppp1cc, Tiam1	vesalius_psf_4
Calcium_signaling_pathway	8.7036e-07	1.74072e-05	13	168	Itpka, Adcy1, Pde1a, Ppp3ca, Ppp3cc, Prkca, Prkcb, Itpr1, Cacna1c, Adora2a, Drd1, Gnal, Cacna1g	vesalius_psf_4
Ras_signaling_pathway	4.3025e-05	0.000573666	12	207	Grb2, Tiam1, Prkca, Prkcb, Abl2, Mapk10, Rasa3, Rasa1, Rasa2, Gng4, Gng7, Gng13	vesalius_psf_4
MAPK_signaling_pathway	0.000197903	0.00197903	13	280	Ptpn5, Rasa1, Prkca, Prkcb, Rasa2, Grb2, Cacng5, Cacna1c, Cacnb3, Cacna1g, Mapk10, Ppp3ca, Ppp3cc	vesalius_psf_4
ErbB_signaling_pathway	0.00111241	0.00889927	6	82	Grb2, Cdkn1a, Mapk10, Prkca, Prkcb, Abl2	vesalius_psf_4
Rap1_signaling_pathway	0.00176088	0.0102457	9	192	Rap1gap, Adora2a, Tiam1, Adcy1, Adcy5, Cnr1, Drd2, Prkca, Prkcb	vesalius_psf_4
Chemokine_signaling_pathway	0.001793	0.0102457	8	156	Gng4, Gng7, Gng13, Grb2, Adcy1, Adcy5, Prkcb, Tiam1	vesalius_psf_4
cGMP_PKG_signaling_pathway	0.00593623	0.0296812	7	151	Ppp1cc, Itpr1, Cacna1c, Ppp3ca, Ppp3cc, Adcy1, Adcy5	vesalius_psf_4
VEGF_signaling_pathway	0.00774303	0.0344135	4	55	Ppp3ca, Ppp3cc, Prkca, Prkcb	vesalius_psf_4
Endocrine_resistance	0.0092535	0.037014	5	90	Grb2, Adcy1, Adcy5, Mapk10, Cdkn1a	vesalius_psf_4
Wnt_signaling_pathway	0.0124097	0.0451261	6	134	Prkca, Prkcb, Ppp3ca, Ppp3cc, Mapk10, Apc	vesalius_psf_4
Calcium_signaling_pathway	6.58572e-06	0.000263429	10	168	Itpka, Camk2a, Ppp3ca, Ppp3r1, Prkcg, Erbb3, Itpr1, Ednrb, Calm2, Drd1	vesalius_psf_5
cGMP_PKG_signaling_pathway	0.000127379	0.00254759	8	151	Itpr1, Ednrb, Ppp3ca, Ppp3r1, Atp1a2, Atp1b2, Calm2, Nppa	vesalius_psf_5
PPAR_signaling_pathway	0.000263659	0.00351545	5	58	Slc27a1, Fabp7, Acsbg1, Hmgcs2, Dbi	vesalius_psf_5
cAMP_signaling_pathway	2.31724e-06	9.26895e-05	7	181	Drd2, Adcy5, Calml4, Adora2a, Pde10a, Fxyd1, Ppp1r1b	vesalius_psf_8
Calcium_signaling_pathway	3.93093e-07	1.56143e-05	10	168	Pde1a, Pde1b, Slc8a1, Ppp3ca, Adora2a, Drd1, Gnal, Gnas, Atp2b1, Atp2b4	vesalius_psf_9
cAMP_signaling_pathway	7.80716e-07	1.56143e-05	10	181	Drd2, Gnas, Adcy5, Atp2b1, Atp2b4, Adora2a, Drd1, Pde10a, Ppp1r1b, Pak1	vesalius_psf_9
MAPK_signaling_pathway	0.000201233	0.00268311	9	280	Rasgrf2, Ptpn5, Stmn1, Rasgrp2, Cacna2d3, Mef2c, Pak1, Ppp3ca, Tgfa	vesalius_psf_9
Rap1_signaling_pathway	0.000494927	0.00494927	7	192	Rap1gap, Adora2a, Gnas, Rasgrp2, Adcy5, Cnr1, Drd2	vesalius_psf_9
Ras_signaling_pathway	0.000772787	0.00535638	7	207	Tgfa, Rasgrp2, Rasgrf2, Gnb5, Gng4, Gng7, Pak1	vesalius_psf_9
cGMP_PKG_signaling_pathway	0.000803457	0.00535638	6	151	Ppp3ca, Mef2c, Slc8a1, Atp2b1, Atp2b4, Adcy5	vesalius_psf_9
Chemokine_signaling_pathway	0.000951821	0.00543898	6	156	Gnb5, Gng4, Gng7, Adcy5, Rasgrp2, Pak1	vesalius_psf_9
cAMP_signaling_pathway	1.1331e-06	4.53242e-05	7	181	Drd2, Adcy5, Camk2a, Adora2a, Drd1, Pde10a, Ppp1r1b	vesalius_psf_11
Calcium_signaling_pathway	0.00163315	0.032663	4	168	Pde1b, Camk2a, Adora2a, Drd1	vesalius_psf_11
cAMP_signaling_pathway	0.000109488	0.00437951	5	181	Drd2, Adcy5, Adora2a, Pde10a, Ppp1r1b	vesalius_psf_13

## Sheet: PSF markers
Sink_ID	Pathway_name	Sink	Process	p_val	avg_log2FC	pct.1	pct.2	p_val_adj	cluster
144; cGMP-PKG-signaling-pathway	cGMP_PKG_signaling_pathway	PDE2A		2.84395e-119	0.553751	1	1	2.01636e-116	seurat_exp_0
13; MAPK-signaling-pathway	MAPK_signaling_pathway	STMN1		6.09644e-109	-0.671814	1	1	4.32237e-106	seurat_exp_0
41; PPAR-signaling-pathway	PPAR_signaling_pathway	LPL	Fatty acid transport; Lipid metabolism	5.32536e-101	0.878863	1	1	3.77568e-98	seurat_exp_0
52; MAPK-signaling-pathway	MAPK_signaling_pathway	MEF2C	DNA; Proliferation differentiation, inflammation	1.59396e-94	-0.775932	1	1	1.13012e-91	seurat_exp_0
123; cAMP-signaling-pathway	cAMP_signaling_pathway	PAK1	Cytoskeletal remodelling, acherens junction enhancerment (vascular endothelial cell)	7.18403e-84	-0.601919	1	1	5.09348e-81	seurat_exp_0
46; Insulin-signaling-pathway	Insulin_signaling_pathway	FBP1	Glycolysis;Glucose homeostasis; Glycogenesis	1.42331e-81	0.640024	1	1	1.00913e-78	seurat_exp_0
38; Fc-gamma-R-mediated-phagocytosis	Fc_gamma_R_mediated_phagocytosis	CFL1	Phagocytosis; Membrane traficking; Particle internalization; Phagosome closure; Phagosome-lysosome fusion	6.42374e-76	0.851312	1	1	4.55443e-73	seurat_exp_0
160; C-type-lectin-receptor-signaling-pathway	C_type_lectin_receptor_signaling_pathway	CCL22	Th2 cell differentiation	7.31021e-73	-0.759236	1	1	5.18294e-70	seurat_exp_0
56; C-type-lectin-receptor-signaling-pathway	C_type_lectin_receptor_signaling_pathway	IL6	Th2 cell differentiation	9.24019e-73	0.664459	1	1	6.5513e-70	seurat_exp_0
55; C-type-lectin-receptor-signaling-pathway	C_type_lectin_receptor_signaling_pathway	IL10	Th2 cell differentiation	1.75576e-72	-0.752574	1	1	1.24483e-69	seurat_exp_0
161; C-type-lectin-receptor-signaling-pathway	C_type_lectin_receptor_signaling_pathway	CCL17	Th2 cell differentiation	5.44113e-72	-0.781051	1	1	3.85776e-69	seurat_exp_0
22; C-type-lectin-receptor-signaling-pathway	C_type_lectin_receptor_signaling_pathway	IL23A	Th2 cell differentiation	7.74744e-72	0.660782	1	1	5.49294e-69	seurat_exp_0
145; Endocrine-resistance	Endocrine_resistance	FOS	DNA; CoA overexpression AP1/SP1 overexpression; Transcription Proliferation	3.04348e-67	-0.508723	1	1	2.15783e-64	seurat_exp_0
57; C-type-lectin-receptor-signaling-pathway	C_type_lectin_receptor_signaling_pathway	IL12A	Th2 cell differentiation	3.51106e-64	0.592204	1	1	2.48934e-61	seurat_exp_0
30; Rap1-signaling-pathway	Rap1_signaling_pathway	ITGAL	Cell adhesion,migration,polarity	5.95056e-61	0.655289	1	1	4.21895e-58	seurat_exp_0
164; C-type-lectin-receptor-signaling-pathway	C_type_lectin_receptor_signaling_pathway	EGR2	Th1 Th17 cell differentiation	6.76546e-61	0.541935	1	1	4.79671e-58	seurat_exp_0
17; Rap1-signaling-pathway	Rap1_signaling_pathway	ACTB	Cell adhesion,migration,polarity	4.1495e-59	0.620911	1	1	2.94199e-56	seurat_exp_0
96; Rap1-signaling-pathway	Rap1_signaling_pathway	PLCE1	Proliferation survival gene activation	2.91788e-58	0.538882	1	1	2.06878e-55	seurat_exp_0
82; Rap1-signaling-pathway	Rap1_signaling_pathway	ITGA2B	Cell adhesion,migration,polarity	2.71823e-50	0.697262	1	1	1.92722e-47	seurat_exp_0
15; AMPK-signaling-pathway	AMPK_signaling_pathway	FOXO1	Activated mitochondrial biogeneses	1.27833e-47	0.743537	1	1	9.06334e-45	seurat_exp_0
40; TNF-signaling-pathway	TNF_signaling_pathway	JUN		2.22366e-41	-0.663746	1	1	1.57658e-38	seurat_exp_0
67; Rap1-signaling-pathway	Rap1_signaling_pathway	AKT3	Proliferation survival gene activation	3.64534e-40	0.563345	1	1	2.58454e-37	seurat_exp_0
86; Apoptosis	Apoptosis	BCL2L11	Pro-apoptotic genes	5.67212e-39	-0.507651	1	1	4.02153e-36	seurat_exp_0
95; Rap1-signaling-pathway	Rap1_signaling_pathway	THBS1	Defective angiogensis	1.5474e-34	0.593486	1	1	1.09711e-31	seurat_exp_0
48; Rap1-signaling-pathway	Rap1_signaling_pathway	PARD3	Cell adhesion,migration,polarity	1.05102e-33	0.731514	1	1	7.45173e-31	seurat_exp_0
30; Fc-epsilon-RI-signaling-pathway	Fc_epsilon_RI_signaling_pathway	PRKCA	DNA; Cytokine gene transcription	4.53278e-33	-0.505878	1	1	3.21374e-30	seurat_exp_0
168; C-type-lectin-receptor-signaling-pathway	C_type_lectin_receptor_signaling_pathway	IL12A	Th1 Th17 cell differentiation	2.17908e-19	-0.78588	1	1	1.54496e-16	seurat_exp_0
78; Hippo-signaling-pathway	Hippo_signaling_pathway	SOX2	Anti-apoptotic genes; Pro-proliferation genes	3.0877e-15	-0.68854	1	1	2.18918e-12	seurat_exp_0
54; AMPK-signaling-pathway	AMPK_signaling_pathway	SLC2A4	Activated mitochondrial biogeneses	5.94916e-15	-0.531512	1	1	4.21796e-12	seurat_exp_0
50; C-type-lectin-receptor-signaling-pathway	C_type_lectin_receptor_signaling_pathway	IL17D	Tfh cell differentiation	6.9983e-14	-0.572277	1	1	4.9618e-11	seurat_exp_0
12; Hippo-signaling-pathway	Hippo_signaling_pathway	CTGF	Anti-apoptotic genes; Pro-proliferation genes	7.66694e-11	-0.600759	1	1	5.43586e-08	seurat_exp_0
81; mTOR-signaling-pathway	mTOR_signaling_pathway	CLIP1	Microtubule organization	2.84154e-08	-0.516093	1	1	2.01465e-05	seurat_exp_0
74; Hippo-signaling-pathway	Hippo_signaling_pathway	AXIN1	Anti-apoptotic genes; Pro-proliferation genes	1.39968e-05	-0.522239	1	1	0.00992374	seurat_exp_0
113; NF-kappa-B-signaling-pathway	NF_kappa_B_signaling_pathway	CFLAR	Survival	2.1166e-05	-0.56867	1	1	0.0150067	seurat_exp_0
125; Endocrine-resistance	Endocrine_resistance	JUN	DNA; Transcription Proliferation	3.71437e-05	-0.576412	1	1	0.0263348	seurat_exp_0
74; PPAR-signaling-pathway	PPAR_signaling_pathway	DBI	Fatty acid transport; Lipid metabolism	4.84162e-30	-0.592618	1	1	3.43271e-27	seurat_exp_1
126; Endocrine-resistance	Endocrine_resistance	FOS	DNA; Transcription Proliferation	6.2964e-16	-0.770724	1	1	4.46415e-13	seurat_exp_1
60; Hippo-signaling-pathway	Hippo_signaling_pathway	CTGF	Anti-apoptotic genes; Pro-proliferation genes	7.4461e-16	0.989846	1	1	5.27929e-13	seurat_exp_1
125; Endocrine-resistance	Endocrine_resistance	JUN	DNA; Transcription Proliferation	5.10571e-14	-1.0227	1	1	3.61995e-11	seurat_exp_1
12; Hippo-signaling-pathway	Hippo_signaling_pathway	CTGF	Anti-apoptotic genes; Pro-proliferation genes	1.13382e-11	0.704391	1	1	8.03877e-09	seurat_exp_1
164; cGMP-PKG-signaling-pathway	cGMP_PKG_signaling_pathway	PPIF	Cardioprotection	1.42952e-10	-0.667108	1	1	1.01353e-07	seurat_exp_1
94; cGMP-PKG-signaling-pathway	cGMP_PKG_signaling_pathway	MAPK1	Platelet activation	7.04761e-10	-0.522227	1	1	4.99676e-07	seurat_exp_1
48; Rap1-signaling-pathway	Rap1_signaling_pathway	PARD3	Cell adhesion,migration,polarity	1.8314e-09	-0.629447	1	1	1.29846e-06	seurat_exp_1
3; Rap1-signaling-pathway	Rap1_signaling_pathway	MAPK1	Proliferation survival gene activation	7.71761e-09	-0.510716	1	1	5.47178e-06	seurat_exp_1
78; Hippo-signaling-pathway	Hippo_signaling_pathway	SOX2	Anti-apoptotic genes; Pro-proliferation genes	9.57575e-07	-0.651581	1	1	0.000678921	seurat_exp_1
65; ErbB-signaling-pathway	ErbB_signaling_pathway	MYC	DNA; Adhesion	2.44676e-06	-0.865371	1	1	0.00173475	seurat_exp_1
9; Insulin-signaling-pathway	Insulin_signaling_pathway	ELK1	DNA; Proliferation differentiation	3.80262e-05	-0.699123	1	1	0.0269606	seurat_exp_1
6; Fc-epsilon-RI-signaling-pathway	Fc_epsilon_RI_signaling_pathway	C00696	Generation of eicosanoids	5.97326e-05	-0.729369	1	1	0.0423504	seurat_exp_1
7; Fc-epsilon-RI-signaling-pathway	Fc_epsilon_RI_signaling_pathway	C05952	Generation of eicosanoids	5.97326e-05	-0.729369	1	1	0.0423504	seurat_exp_1
8; Fc-epsilon-RI-signaling-pathway	Fc_epsilon_RI_signaling_pathway	C05951	Generation of eicosanoids	5.97326e-05	-0.729369	1	1	0.0423504	seurat_exp_1
9; Fc-epsilon-RI-signaling-pathway	Fc_epsilon_RI_signaling_pathway	C02166	Generation of eicosanoids	5.97326e-05	-0.729369	1	1	0.0423504	seurat_exp_1
26; Calcium-signaling-pathway	Calcium_signaling_pathway	PPP3CA	Proliferation; Fertilization; Learning and memory	9.985e-119	-0.502004	1	1	7.07936e-116	seurat_exp_2
50; HIF-1-signaling-pathway	HIF_1_signaling_pathway	TF	Increase oxygen delivery; Iron metabolism	1.23751e-104	1.32105	1	1	8.77396e-102	seurat_exp_2
120; C-type-lectin-receptor-signaling-pathway	C_type_lectin_receptor_signaling_pathway	IL17D	Th1 Th17 cell differentiation	1.79474e-86	-0.666594	1	1	1.27247e-83	seurat_exp_2
58; AMPK-signaling-pathway	AMPK_signaling_pathway	SCD	Repressed fatty acid syntheses	6.74286e-81	0.952712	1	1	4.78069e-78	seurat_exp_2
164; C-type-lectin-receptor-signaling-pathway	C_type_lectin_receptor_signaling_pathway	EGR2	Th1 Th17 cell differentiation	3.46619e-59	-0.629419	1	1	2.45753e-56	seurat_exp_2
159; C-type-lectin-receptor-signaling-pathway	C_type_lectin_receptor_signaling_pathway	PTGS2	Th1 Th17 cell differentiation	9.21377e-58	-0.555301	1	1	6.53256e-55	seurat_exp_2
157; C-type-lectin-receptor-signaling-pathway	C_type_lectin_receptor_signaling_pathway	IL10	Th1 Th17 cell differentiation	9.3357e-56	-0.503198	1	1	6.61901e-53	seurat_exp_2
89; C-type-lectin-receptor-signaling-pathway	C_type_lectin_receptor_signaling_pathway	IL2	Th1 Th17 cell differentiation	2.79837e-55	-0.522405	1	1	1.98405e-52	seurat_exp_2
56; AMPK-signaling-pathway	AMPK_signaling_pathway	FASN	Repressed fatty acid syntheses	3.28064e-45	0.688051	1	1	2.32597e-42	seurat_exp_2
36; JAK-STAT-signaling-pathway	JAK_STAT_signaling_pathway	GFAP	Differentation	9.07549e-43	0.688263	1	1	6.43453e-40	seurat_exp_2
114; Apoptosis	Apoptosis	HRK	Pro-apoptotic genes	1.01591e-39	-0.634714	1	1	7.20281e-37	seurat_exp_2
164; cGMP-PKG-signaling-pathway	cGMP_PKG_signaling_pathway	PPIF	Cardioprotection	1.77415e-39	0.6078	1	1	1.25787e-36	seurat_exp_2
52; MAPK-signaling-pathway	MAPK_signaling_pathway	MEF2C	DNA; Proliferation differentiation, inflammation	1.73751e-36	-0.622849	1	1	1.23189e-33	seurat_exp_2
36; TNF-signaling-pathway	TNF_signaling_pathway	CREB3		7.48503e-36	-0.812154	1	1	5.30689e-33	seurat_exp_2
83; Apoptosis	Apoptosis	TP53	Pro-apoptotic genes	1.8901e-33	-0.5667	1	1	1.34008e-30	seurat_exp_2
116; NF-kappa-B-signaling-pathway	NF_kappa_B_signaling_pathway	GADD45B	Survival	8.98225e-33	-0.652427	1	1	6.36842e-30	seurat_exp_2
19; mTOR-signaling-pathway	mTOR_signaling_pathway	PRKCA	Cytoskeletal organization	9.04773e-33	-0.62152	1	1	6.41484e-30	seurat_exp_2
142; NF-kappa-B-signaling-pathway	NF_kappa_B_signaling_pathway	NFKB2	Activation of noncanonical pathway	6.93081e-32	-0.742423	1	1	4.91394e-29	seurat_exp_2
182; NOD-like-receptor-signaling-pathway	NOD_like_receptor_signaling_pathway	C16054...		8.86496e-31	-0.524961	1	1	6.28526e-28	seurat_exp_2
134; NF-kappa-B-signaling-pathway	NF_kappa_B_signaling_pathway	CCL21	Lymphoid-tissue homing	1.72164e-29	-0.775221	1	1	1.22064e-26	seurat_exp_2
54; NF-kappa-B-signaling-pathway	NF_kappa_B_signaling_pathway	CCL13	Lymphoid-tissue homing	2.31669e-29	-0.771879	1	1	1.64253e-26	seurat_exp_2
58; Fc-gamma-R-mediated-phagocytosis	Fc_gamma_R_mediated_phagocytosis	C00219	Phagocytosis; Membrane remodeling; Focal exocytosis; Pseudopod extention; Particle internalization	2.31881e-29	-0.540266	1	1	1.64403e-26	seurat_exp_2
135; NF-kappa-B-signaling-pathway	NF_kappa_B_signaling_pathway	CCL19	Lymphoid-tissue homing	4.39413e-29	-0.732296	1	1	3.11544e-26	seurat_exp_2
129; NF-kappa-B-signaling-pathway	NF_kappa_B_signaling_pathway	PTGS2	Inflammation	5.0796e-29	-0.607676	1	1	3.60144e-26	seurat_exp_2
3; NF-kappa-B-signaling-pathway	NF_kappa_B_signaling_pathway	BCL2	Survival	5.85792e-29	-0.700957	1	1	4.15326e-26	seurat_exp_2
4; NF-kappa-B-signaling-pathway	NF_kappa_B_signaling_pathway	BIRC2	Survival	8.15483e-29	-0.610172	1	1	5.78177e-26	seurat_exp_2
136; NF-kappa-B-signaling-pathway	NF_kappa_B_signaling_pathway	TNFSF13B	B-cell development; B-cell survival	1.03683e-28	-0.771334	1	1	7.35113e-26	seurat_exp_2
137; NF-kappa-B-signaling-pathway	NF_kappa_B_signaling_pathway	ICAM1	Lymphocyte adhesion, T-cell costimulation	1.4299e-28	-0.775075	1	1	1.0138e-25	seurat_exp_2
12; T-cell-receptor-signaling-pathway	T_cell_receptor_signaling_pathway	IL2	Proliferation Differentation; Immuno response	2.52808e-27	-0.692209	1	1	1.79241e-24	seurat_exp_2
6; B-cell-receptor-signaling-pathway	B_cell_receptor_signaling_pathway	NFKB1	DNA; B cell ontogeny; Autoimmunity; Anergy; Immuno response Ig production GC formation	4.09876e-27	-0.542099	1	1	2.90602e-24	seurat_exp_2
57; AMPK-signaling-pathway	AMPK_signaling_pathway	ACACA	Repressed fatty acid syntheses	4.31255e-27	0.521353	1	1	3.0576e-24	seurat_exp_2
51; NF-kappa-B-signaling-pathway	NF_kappa_B_signaling_pathway	TNFAIP3	Negative feedback	7.6196e-27	-0.590127	1	1	5.4023e-24	seurat_exp_2
6; T-cell-receptor-signaling-pathway	T_cell_receptor_signaling_pathway	TNF	Proliferation Differentation; Immuno response	7.82162e-27	-0.649504	1	1	5.54553e-24	seurat_exp_2
7; T-cell-receptor-signaling-pathway	T_cell_receptor_signaling_pathway	CSF2	Proliferation Differentation; Immuno response	7.82162e-27	-0.649504	1	1	5.54553e-24	seurat_exp_2
8; T-cell-receptor-signaling-pathway	T_cell_receptor_signaling_pathway	IFNG	Proliferation Differentation; Immuno response	7.82162e-27	-0.649504	1	1	5.54553e-24	seurat_exp_2
9; T-cell-receptor-signaling-pathway	T_cell_receptor_signaling_pathway	IL10	Proliferation Differentation; Immuno response	7.82162e-27	-0.649504	1	1	5.54553e-24	seurat_exp_2
10; T-cell-receptor-signaling-pathway	T_cell_receptor_signaling_pathway	IL5	Proliferation Differentation; Immuno response	8.12751e-27	-0.651974	1	1	5.76241e-24	seurat_exp_2
128; NF-kappa-B-signaling-pathway	NF_kappa_B_signaling_pathway	IL1B	Positive feedback	9.44548e-27	-0.556621	1	1	6.69684e-24	seurat_exp_2
11; T-cell-receptor-signaling-pathway	T_cell_receptor_signaling_pathway	IL4	Proliferation Differentation; Immuno response	2.04919e-26	-0.648758	1	1	1.45288e-23	seurat_exp_2
43; Ras-signaling-pathway	Ras_signaling_pathway	ELK1	Gene expression	2.28897e-26	-0.681063	1	1	1.62288e-23	seurat_exp_2
3; ErbB-signaling-pathway	ErbB_signaling_pathway	ELK1	DNA; Migration/ Invasion	2.39207e-26	-1.01499	1	1	1.69598e-23	seurat_exp_2
53; NF-kappa-B-signaling-pathway	NF_kappa_B_signaling_pathway	CXCL8	Survival	3.34136e-26	-0.548471	1	1	2.36902e-23	seurat_exp_2
115; NF-kappa-B-signaling-pathway	NF_kappa_B_signaling_pathway	XIAP	Survival	3.34136e-26	-0.548471	1	1	2.36902e-23	seurat_exp_2
130; NF-kappa-B-signaling-pathway	NF_kappa_B_signaling_pathway	TNF	Positive feedback	3.34136e-26	-0.548471	1	1	2.36902e-23	seurat_exp_2
133; NF-kappa-B-signaling-pathway	NF_kappa_B_signaling_pathway	CXCL2	Inflammation	3.34136e-26	-0.548471	1	1	2.36902e-23	seurat_exp_2
131; NF-kappa-B-signaling-pathway	NF_kappa_B_signaling_pathway	CCL4L1	Inflammation	5.40685e-26	-0.550515	1	1	3.83346e-23	seurat_exp_2
52; NF-kappa-B-signaling-pathway	NF_kappa_B_signaling_pathway	TRAF1	Survival	6.92582e-26	-0.611893	1	1	4.91041e-23	seurat_exp_2
114; NF-kappa-B-signaling-pathway	NF_kappa_B_signaling_pathway	BCL2A1	Survival	1.33604e-25	-0.555358	1	1	9.47253e-23	seurat_exp_2
12; Insulin-signaling-pathway	Insulin_signaling_pathway	FASN	Lipogenesis; Lipid homeostasis	2.85323e-24	0.517914	1	1	2.02294e-21	seurat_exp_2
132; NF-kappa-B-signaling-pathway	NF_kappa_B_signaling_pathway	VCAM1	Inflammation	2.87335e-24	-0.741924	1	1	2.03721e-21	seurat_exp_2
44; Ras-signaling-pathway	Ras_signaling_pathway	ETS1	Gene expression	2.95415e-23	-0.522681	1	1	2.09449e-20	seurat_exp_2
53; mTOR-signaling-pathway	mTOR_signaling_pathway	GRB10	Lipolysis	4.16223e-20	-0.601006	1	1	2.95102e-17	seurat_exp_2
55; NF-kappa-B-signaling-pathway	NF_kappa_B_signaling_pathway	CXCL12	Myeloiesis and B-cell lymphopoieses	8.32886e-19	-0.503995	1	1	5.90516e-16	seurat_exp_2
2; NF-kappa-B-signaling-pathway	NF_kappa_B_signaling_pathway	BCL2L1	Survival	1.50416e-18	-0.629459	1	1	1.06645e-15	seurat_exp_2
62; mTOR-signaling-pathway	mTOR_signaling_pathway	TTI1		7.60639e-17	-0.544896	1	1	5.39293e-14	seurat_exp_2
94; cGMP-PKG-signaling-pathway	cGMP_PKG_signaling_pathway	MAPK1	Platelet activation	4.32985e-15	-0.531311	1	1	3.06986e-12	seurat_exp_2
9; Insulin-signaling-pathway	Insulin_signaling_pathway	ELK1	DNA; Proliferation differentiation	1.169e-14	-0.863023	1	1	8.28824e-12	seurat_exp_2
81; mTOR-signaling-pathway	mTOR_signaling_pathway	CLIP1	Microtubule organization	2.45174e-14	-0.611354	1	1	1.73828e-11	seurat_exp_2
65; ErbB-signaling-pathway	ErbB_signaling_pathway	MYC	DNA; Adhesion	6.46309e-10	-0.770108	1	1	4.58233e-07	seurat_exp_2
74; Hippo-signaling-pathway	Hippo_signaling_pathway	AXIN1	Anti-apoptotic genes; Pro-proliferation genes	1.54167e-09	-0.571086	1	1	1.09304e-06	seurat_exp_2
5; T-cell-receptor-signaling-pathway	T_cell_receptor_signaling_pathway	CDK4	Proliferation Differentation; Immuno response	4.00236e-09	-0.661047	1	1	2.83767e-06	seurat_exp_2
6; Fc-epsilon-RI-signaling-pathway	Fc_epsilon_RI_signaling_pathway	C00696	Generation of eicosanoids	2.09306e-07	-0.742575	1	1	0.000148398	seurat_exp_2
7; Fc-epsilon-RI-signaling-pathway	Fc_epsilon_RI_signaling_pathway	C05952	Generation of eicosanoids	2.09306e-07	-0.742575	1	1	0.000148398	seurat_exp_2
8; Fc-epsilon-RI-signaling-pathway	Fc_epsilon_RI_signaling_pathway	C05951	Generation of eicosanoids	2.09306e-07	-0.742575	1	1	0.000148398	seurat_exp_2
9; Fc-epsilon-RI-signaling-pathway	Fc_epsilon_RI_signaling_pathway	C02166	Generation of eicosanoids	2.09306e-07	-0.742575	1	1	0.000148398	seurat_exp_2
126; Endocrine-resistance	Endocrine_resistance	FOS	DNA; Transcription Proliferation	2.36754e-06	-0.720486	1	1	0.00167858	seurat_exp_2
32; Insulin-signaling-pathway	Insulin_signaling_pathway	EIF4E	Protein synthesis	4.94003e-06	-0.572114	1	1	0.00350248	seurat_exp_2
120; C-type-lectin-receptor-signaling-pathway	C_type_lectin_receptor_signaling_pathway	IL17D	Th1 Th17 cell differentiation	2.22246e-38	-0.526644	1	1	1.57572e-35	seurat_exp_3
164; C-type-lectin-receptor-signaling-pathway	C_type_lectin_receptor_signaling_pathway	EGR2	Th1 Th17 cell differentiation	2.76229e-36	-0.562323	1	1	1.95846e-33	seurat_exp_3
12; T-cell-receptor-signaling-pathway	T_cell_receptor_signaling_pathway	IL2	Proliferation Differentation; Immuno response	3.56601e-19	-0.610143	1	1	2.5283e-16	seurat_exp_3
100; Ras-signaling-pathway	Ras_signaling_pathway	REL	Gene expression	1.15857e-18	-0.546817	1	1	8.21429e-16	seurat_exp_3
3; ErbB-signaling-pathway	ErbB_signaling_pathway	ELK1	DNA; Migration/ Invasion	4.06079e-18	-0.987514	1	1	2.8791e-15	seurat_exp_3
155; Chemokine-signaling-pathway	Chemokine_signaling_pathway	PXN	Migration	7.67298e-18	-0.523739	1	1	5.44015e-15	seurat_exp_3
11; T-cell-receptor-signaling-pathway	T_cell_receptor_signaling_pathway	IL4	Proliferation Differentation; Immuno response	1.20428e-17	-0.580438	1	1	8.53835e-15	seurat_exp_3
6; T-cell-receptor-signaling-pathway	T_cell_receptor_signaling_pathway	TNF	Proliferation Differentation; Immuno response	1.68774e-17	-0.578017	1	1	1.19661e-14	seurat_exp_3
7; T-cell-receptor-signaling-pathway	T_cell_receptor_signaling_pathway	CSF2	Proliferation Differentation; Immuno response	1.68774e-17	-0.578017	1	1	1.19661e-14	seurat_exp_3
8; T-cell-receptor-signaling-pathway	T_cell_receptor_signaling_pathway	IFNG	Proliferation Differentation; Immuno response	1.68774e-17	-0.578017	1	1	1.19661e-14	seurat_exp_3
9; T-cell-receptor-signaling-pathway	T_cell_receptor_signaling_pathway	IL10	Proliferation Differentation; Immuno response	1.68774e-17	-0.578017	1	1	1.19661e-14	seurat_exp_3
10; T-cell-receptor-signaling-pathway	T_cell_receptor_signaling_pathway	IL5	Proliferation Differentation; Immuno response	1.69039e-17	-0.578097	1	1	1.19849e-14	seurat_exp_3
36; JAK-STAT-signaling-pathway	JAK_STAT_signaling_pathway	GFAP	Differentation	1.80367e-15	0.573198	1	1	1.2788e-12	seurat_exp_3
9; Insulin-signaling-pathway	Insulin_signaling_pathway	ELK1	DNA; Proliferation differentiation	4.21156e-15	-0.777253	1	1	2.986e-12	seurat_exp_3
118; cAMP-signaling-pathway	cAMP_signaling_pathway	MYL9	Relaxation (endothelial cell, smooth muscle cell)	1.36713e-14	0.713534	1	1	9.69296e-12	seurat_exp_3
48; Rap1-signaling-pathway	Rap1_signaling_pathway	PARD3	Cell adhesion,migration,polarity	1.39763e-14	-0.649835	1	1	9.90922e-12	seurat_exp_3
20; Cell-cycle	Cell_cycle	MCM2	DNA; DNA biosynthesis	1.0162e-13	-0.833274	1	1	7.20486e-11	seurat_exp_3
5; T-cell-receptor-signaling-pathway	T_cell_receptor_signaling_pathway	CDK4	Proliferation Differentation; Immuno response	3.26539e-13	-0.753972	1	1	2.31516e-10	seurat_exp_3
65; ErbB-signaling-pathway	ErbB_signaling_pathway	MYC	DNA; Adhesion	3.34453e-13	-0.9249	1	1	2.37127e-10	seurat_exp_3
3; NF-kappa-B-signaling-pathway	NF_kappa_B_signaling_pathway	BCL2	Survival	1.48139e-12	-0.570314	1	1	1.05031e-09	seurat_exp_3
36; TNF-signaling-pathway	TNF_signaling_pathway	CREB3		1.71392e-12	-0.605009	1	1	1.21517e-09	seurat_exp_3
24; B-cell-receptor-signaling-pathway	B_cell_receptor_signaling_pathway	FOS	DNA; B cell ontogeny; Autoimmunity; Anergy; Immuno response Ig production GC formation	4.20123e-12	-0.527864	1	1	2.97867e-09	seurat_exp_3
4; NF-kappa-B-signaling-pathway	NF_kappa_B_signaling_pathway	BIRC2	Survival	1.38714e-11	-0.565998	1	1	9.83485e-09	seurat_exp_3
142; NF-kappa-B-signaling-pathway	NF_kappa_B_signaling_pathway	NFKB2	Activation of noncanonical pathway	2.21226e-11	-0.501266	1	1	1.56849e-08	seurat_exp_3
109; Chemokine-signaling-pathway	Chemokine_signaling_pathway	MAPK1	DNA; Cytokine production; Cellular gowth and differentiation; Cell survival; Migration; Apoptosis	2.26079e-06	-0.635325	1	1	0.0016029	seurat_exp_3
32; Insulin-signaling-pathway	Insulin_signaling_pathway	EIF4E	Protein synthesis	2.14432e-05	-0.591135	1	1	0.0152032	seurat_exp_3
52; MAPK-signaling-pathway	MAPK_signaling_pathway	MEF2C	DNA; Proliferation differentiation, inflammation	7.54253e-59	0.817329	1	1	5.34765e-56	seurat_exp_4
50; HIF-1-signaling-pathway	HIF_1_signaling_pathway	TF	Increase oxygen delivery; Iron metabolism	1.33105e-46	-0.768522	1	1	9.43715e-44	seurat_exp_4
17; Rap1-signaling-pathway	Rap1_signaling_pathway	ACTB	Cell adhesion,migration,polarity	2.4472e-33	-0.752182	1	1	1.73507e-30	seurat_exp_4
74; PPAR-signaling-pathway	PPAR_signaling_pathway	DBI	Fatty acid transport; Lipid metabolism	3.49395e-33	-0.653471	1	1	2.47721e-30	seurat_exp_4
30; Rap1-signaling-pathway	Rap1_signaling_pathway	ITGAL	Cell adhesion,migration,polarity	9.06119e-16	-0.559062	1	1	6.42439e-13	seurat_exp_4
36; JAK-STAT-signaling-pathway	JAK_STAT_signaling_pathway	GFAP	Differentation	1.50478e-15	-0.516947	1	1	1.06689e-12	seurat_exp_4
18; Rap1-signaling-pathway	Rap1_signaling_pathway	CDH1	Cell adhesion,migration,polarity	7.31242e-15	-0.600662	1	1	5.18451e-12	seurat_exp_4
12; Hippo-signaling-pathway	Hippo_signaling_pathway	CTGF	Anti-apoptotic genes; Pro-proliferation genes	8.56246e-15	-0.649216	1	1	6.07078e-12	seurat_exp_4
79; Hippo-signaling-pathway	Hippo_signaling_pathway	SNAI2	Anti-apoptotic genes; Pro-proliferation genes	1.83275e-12	-0.505957	1	1	1.29942e-09	seurat_exp_4
75; Hippo-signaling-pathway	Hippo_signaling_pathway	NKD1	Anti-apoptotic genes; Pro-proliferation genes	3.19631e-12	-0.532194	1	1	2.26618e-09	seurat_exp_4
80; Hippo-signaling-pathway	Hippo_signaling_pathway	BIRC2	Anti-apoptotic genes; Pro-proliferation genes	2.93369e-11	-0.542304	1	1	2.07999e-08	seurat_exp_4
5; T-cell-receptor-signaling-pathway	T_cell_receptor_signaling_pathway	CDK4	Proliferation Differentation; Immuno response	2.19003e-10	-0.667177	1	1	1.55273e-07	seurat_exp_4
48; Rap1-signaling-pathway	Rap1_signaling_pathway	PARD3	Cell adhesion,migration,polarity	4.1752e-10	-0.621685	1	1	2.96022e-07	seurat_exp_4
76; Hippo-signaling-pathway	Hippo_signaling_pathway	MYC	Anti-apoptotic genes; Pro-proliferation genes	5.47815e-10	-0.51325	1	1	3.884e-07	seurat_exp_4
74; Hippo-signaling-pathway	Hippo_signaling_pathway	AXIN1	Anti-apoptotic genes; Pro-proliferation genes	4.55234e-09	-0.598973	1	1	3.22761e-06	seurat_exp_4
78; Hippo-signaling-pathway	Hippo_signaling_pathway	SOX2	Anti-apoptotic genes; Pro-proliferation genes	8.17822e-09	-0.68767	1	1	5.79835e-06	seurat_exp_4
168; C-type-lectin-receptor-signaling-pathway	C_type_lectin_receptor_signaling_pathway	IL12A	Th1 Th17 cell differentiation	1.89648e-08	-0.739438	1	1	1.34461e-05	seurat_exp_4
24; B-cell-receptor-signaling-pathway	B_cell_receptor_signaling_pathway	FOS	DNA; B cell ontogeny; Autoimmunity; Anergy; Immuno response Ig production GC formation	2.21572e-08	-0.520457	1	1	1.57094e-05	seurat_exp_4
77; Hippo-signaling-pathway	Hippo_signaling_pathway	CCND1	Anti-apoptotic genes; Pro-proliferation genes	5.59001e-06	-0.521284	1	1	0.00396331	seurat_exp_4
59; Ras-signaling-pathway	Ras_signaling_pathway	STK4	Apoptosis; Cell-cycle arrest	8.44471e-06	0.519271	1	1	0.0059873	seurat_exp_4
74; PPAR-signaling-pathway	PPAR_signaling_pathway	DBI	Fatty acid transport; Lipid metabolism	1.19479e-74	1.49421	1	1	8.47104e-72	seurat_exp_5
106; cGMP-PKG-signaling-pathway	cGMP_PKG_signaling_pathway	ATP1B4...		2.9327e-60	0.829052	1	1	2.07928e-57	seurat_exp_5
71; PPAR-signaling-pathway	PPAR_signaling_pathway	CYP27A1	Cholesterol metabolism; Lipid metabilism	1.51488e-59	0.847451	1	1	1.07405e-56	seurat_exp_5
18; PPAR-signaling-pathway	PPAR_signaling_pathway	AQP7B...	Gluconeogenesis	6.02787e-56	0.725262	1	1	4.27376e-53	seurat_exp_5
40; PPAR-signaling-pathway	PPAR_signaling_pathway	OLR1	Fatty acid transport; Lipid metabolism	6.02787e-56	0.725262	1	1	4.27376e-53	seurat_exp_5
50; PPAR-signaling-pathway	PPAR_signaling_pathway	MMP1	Adipocyte differentiation	6.02787e-56	0.725262	1	1	4.27376e-53	seurat_exp_5
64; PPAR-signaling-pathway	PPAR_signaling_pathway	ADIPOQ	Adipocyte differentiation	6.02787e-56	0.725262	1	1	4.27376e-53	seurat_exp_5
51; PPAR-signaling-pathway	PPAR_signaling_pathway	FABP4	Adipocyte differentiation	1.14035e-55	0.72247	1	1	8.08508e-53	seurat_exp_5
21; PPAR-signaling-pathway	PPAR_signaling_pathway	PLIN2	Adipocyte differentiation	4.38798e-55	0.809913	1	1	3.11108e-52	seurat_exp_5
42; PPAR-signaling-pathway	PPAR_signaling_pathway	CD36	Fatty acid transport; Lipid metabolism	3.13052e-54	0.744044	1	1	2.21954e-51	seurat_exp_5
111; cGMP-PKG-signaling-pathway	cGMP_PKG_signaling_pathway	GTF2I	Transcription	9.71357e-52	0.812676	1	1	6.88692e-49	seurat_exp_5
49; PPAR-signaling-pathway	PPAR_signaling_pathway	SORBS1	Adipocyte differentiation	5.1659e-51	0.775467	1	1	3.66262e-48	seurat_exp_5
36; JAK-STAT-signaling-pathway	JAK_STAT_signaling_pathway	GFAP	Differentation	3.01332e-47	0.795108	1	1	2.13644e-44	seurat_exp_5
56; PPAR-signaling-pathway	PPAR_signaling_pathway	PDPK1	Cell survival	1.31101e-46	0.748463	1	1	9.29504e-44	seurat_exp_5
101; cGMP-PKG-signaling-pathway	cGMP_PKG_signaling_pathway	CREB3	Increased expression of anti-apoptotic proteins; Decreased activity of caspase -3;Inhibition of apoptosos	6.62736e-44	0.66813	1	1	4.6988e-41	seurat_exp_5
164; C-type-lectin-receptor-signaling-pathway	C_type_lectin_receptor_signaling_pathway	EGR2	Th1 Th17 cell differentiation	7.22026e-44	-0.59728	1	1	5.11917e-41	seurat_exp_5
103; cGMP-PKG-signaling-pathway	cGMP_PKG_signaling_pathway	VASP	Cell growth and differentiantion; Platelet inhibition	2.02824e-42	0.926957	1	1	1.43803e-39	seurat_exp_5
12; Hippo-signaling-pathway	Hippo_signaling_pathway	CTGF	Anti-apoptotic genes; Pro-proliferation genes	1.23983e-41	1.26096	1	1	8.79036e-39	seurat_exp_5
77; PPAR-signaling-pathway	PPAR_signaling_pathway	UCP1	Adaptive themogenesis	2.22191e-41	0.68535	1	1	1.57533e-38	seurat_exp_5
73; PPAR-signaling-pathway	PPAR_signaling_pathway	UBC	Ubiquitination	8.06818e-41	0.900477	1	1	5.72034e-38	seurat_exp_5
52; PPAR-signaling-pathway	PPAR_signaling_pathway	ANGPTL4	Adipocyte differentiation	3.67054e-40	1.03232	1	1	2.60241e-37	seurat_exp_5
125; cGMP-PKG-signaling-pathway	cGMP_PKG_signaling_pathway	C00144		7.52011e-40	0.532186	1	1	5.33176e-37	seurat_exp_5
19; PPAR-signaling-pathway	PPAR_signaling_pathway	GK	Gluconeogenesis	1.43041e-39	0.767115	1	1	1.01416e-36	seurat_exp_5
103; Chemokine-signaling-pathway	Chemokine_signaling_pathway	PAK1		2.9253e-39	0.693418	1	1	2.07404e-36	seurat_exp_5
46; cGMP-PKG-signaling-pathway	cGMP_PKG_signaling_pathway	CNGB1		5.28896e-39	0.523117	1	1	3.74987e-36	seurat_exp_5
38; PPAR-signaling-pathway	PPAR_signaling_pathway	CPT1C	Fatty acid oxidation; Lipit metabolism	9.80823e-39	0.795608	1	1	6.95403e-36	seurat_exp_5
39; PPAR-signaling-pathway	PPAR_signaling_pathway	ACSL1	Fatty acid transport; Lipid metabolism	1.06038e-37	0.704132	1	1	7.51806e-35	seurat_exp_5
54; PPAR-signaling-pathway	PPAR_signaling_pathway	ILK	Cell survival	7.13115e-37	0.983929	1	1	5.05598e-34	seurat_exp_5
70; PPAR-signaling-pathway	PPAR_signaling_pathway	NR1H3	Cholesterol metabolism; Lipid metabilism	1.43658e-35	0.626986	1	1	1.01853e-32	seurat_exp_5
94; cGMP-PKG-signaling-pathway	cGMP_PKG_signaling_pathway	MAPK1	Platelet activation	1.89168e-35	0.872336	1	1	1.3412e-32	seurat_exp_5
31; Complement-and-coagulation-cascades	Complement_and_coagulation_cascades	C6...	Membrane attack complex; Cell lysis	3.4505e-35	0.509499	1	1	2.4464e-32	seurat_exp_5
47; PPAR-signaling-pathway	PPAR_signaling_pathway	SLC27A4	Fatty acid transport; Lipid metabolism	4.09281e-35	1.14436	1	1	2.9018e-32	seurat_exp_5
20; PPAR-signaling-pathway	PPAR_signaling_pathway	PCK1	Gluconeogenesis	1.04532e-34	0.807988	1	1	7.41133e-32	seurat_exp_5
75; Chemokine-signaling-pathway	Chemokine_signaling_pathway	WAS		2.62305e-34	0.529953	1	1	1.85974e-31	seurat_exp_5
161; Chemokine-signaling-pathway	Chemokine_signaling_pathway	BAD		2.74888e-34	-0.509234	1	1	1.94896e-31	seurat_exp_5
121; Chemokine-signaling-pathway	Chemokine_signaling_pathway	NFKB1	DNA; Cytokine production; Cellular gowth and differentiation; Cell survival; Migration; Apoptosis	7.39503e-32	0.607805	1	1	5.24308e-29	seurat_exp_5
67; PPAR-signaling-pathway	PPAR_signaling_pathway	FADS2	Lipogenesis;; Lipid metabolism	1.11509e-31	1.12529	1	1	7.90596e-29	seurat_exp_5
53; PPAR-signaling-pathway	PPAR_signaling_pathway	ACOX1	Fatty acid oxidation; Lipit metabolism	2.56798e-31	0.679305	1	1	1.8207e-28	seurat_exp_5
86; cGMP-PKG-signaling-pathway	cGMP_PKG_signaling_pathway	ATP2A1	Increased calcium sequestration	1.17389e-30	0.522082	1	1	8.32289e-28	seurat_exp_5
34; PPAR-signaling-pathway	PPAR_signaling_pathway	ACADL	Fatty acid oxidation; Lipit metabolism	2.2821e-29	0.974129	1	1	1.61801e-26	seurat_exp_5
66; PPAR-signaling-pathway	PPAR_signaling_pathway	SCD	Lipogenesis;; Lipid metabolism	1.13878e-28	0.836681	1	1	8.07397e-26	seurat_exp_5
105; cGMP-PKG-signaling-pathway	cGMP_PKG_signaling_pathway	SLC8A2		1.0937e-27	0.531573	1	1	7.75435e-25	seurat_exp_5
31; PPAR-signaling-pathway	PPAR_signaling_pathway	SCP2	Fatty acid oxidation; Lipit metabolism	1.43561e-26	0.893972	1	1	1.01785e-23	seurat_exp_5
81; mTOR-signaling-pathway	mTOR_signaling_pathway	CLIP1	Microtubule organization	4.43914e-26	1.02388	1	1	3.14735e-23	seurat_exp_5
116; EGFR-tyrosine-kinase-inhibitor-resistance	EGFR_tyrosine_kinase_inhibitor_resistance	STAT3	Abnormal dimerization of STAT 3; DNA; Differentiation; Growth; Proliferation; Survival; Motility; Angiogenesis	4.78139e-26	0.796544	1	1	3.39001e-23	seurat_exp_5
79; Hippo-signaling-pathway	Hippo_signaling_pathway	SNAI2	Anti-apoptotic genes; Pro-proliferation genes	9.74988e-26	0.668024	1	1	6.91266e-23	seurat_exp_5
54; Chemokine-signaling-pathway	Chemokine_signaling_pathway	ROCK1		1.01113e-25	0.630653	1	1	7.16888e-23	seurat_exp_5
78; Hippo-signaling-pathway	Hippo_signaling_pathway	SOX2	Anti-apoptotic genes; Pro-proliferation genes	6.11048e-25	0.621329	1	1	4.33233e-22	seurat_exp_5
33; PPAR-signaling-pathway	PPAR_signaling_pathway	ACADM	Fatty acid oxidation; Lipit metabolism	1.21553e-24	0.78401	1	1	8.6181e-22	seurat_exp_5
30; Fc-epsilon-RI-signaling-pathway	Fc_epsilon_RI_signaling_pathway	PRKCA	DNA; Cytokine gene transcription	2.38918e-24	0.510449	1	1	1.69393e-21	seurat_exp_5
31; mTOR-signaling-pathway	mTOR_signaling_pathway	EIF4E	Cap-dependent translocation; Protein systhesis	4.03195e-24	0.900482	1	1	2.85865e-21	seurat_exp_5
36; PPAR-signaling-pathway	PPAR_signaling_pathway	EHHADH	Fatty acid oxidation; Lipit metabolism	5.85752e-24	0.558871	1	1	4.15298e-21	seurat_exp_5
62; mTOR-signaling-pathway	mTOR_signaling_pathway	TTI1		1.18312e-23	0.871405	1	1	8.38832e-21	seurat_exp_5
75; Hippo-signaling-pathway	Hippo_signaling_pathway	NKD1	Anti-apoptotic genes; Pro-proliferation genes	1.2601e-23	0.848039	1	1	8.93408e-21	seurat_exp_5
76; Hippo-signaling-pathway	Hippo_signaling_pathway	MYC	Anti-apoptotic genes; Pro-proliferation genes	1.2732e-23	0.719069	1	1	9.02699e-21	seurat_exp_5
53; mTOR-signaling-pathway	mTOR_signaling_pathway	GRB10	Lipolysis	1.76357e-23	0.960186	1	1	1.25037e-20	seurat_exp_5
44; PPAR-signaling-pathway	PPAR_signaling_pathway	CYP7A1	Cholesterol metabolism; Lipid metabilism	2.84542e-23	0.530249	1	1	2.0174e-20	seurat_exp_5
55; PPAR-signaling-pathway	PPAR_signaling_pathway	FABP1	Fatty acid transport; Lipid metabolism	2.84542e-23	0.530249	1	1	2.0174e-20	seurat_exp_5
69; PPAR-signaling-pathway	PPAR_signaling_pathway	CYP8B1	Cholesterol metabolism; Lipid metabilism	2.84542e-23	0.530249	1	1	2.0174e-20	seurat_exp_5
75; PPAR-signaling-pathway	PPAR_signaling_pathway	APOA5	Ketogenesis; Lipid metabolism	2.84542e-23	0.530249	1	1	2.0174e-20	seurat_exp_5
89; Hippo-signaling-pathway	Hippo_signaling_pathway	ID2	Anti-apoptotic genes; Pro-proliferation genes	2.92212e-23	0.654557	1	1	2.07178e-20	seurat_exp_5
68; PPAR-signaling-pathway	PPAR_signaling_pathway	APOC3	Ketogenesis; Lipid metabolism	2.95912e-23	0.523097	1	1	2.09801e-20	seurat_exp_5
32; PPAR-signaling-pathway	PPAR_signaling_pathway	ACAA1	Fatty acid oxidation; Lipit metabolism	3.05303e-23	0.601187	1	1	2.1646e-20	seurat_exp_5
16; mTOR-signaling-pathway	mTOR_signaling_pathway	LPIN1	Lipid biosynthesis	4.47976e-23	0.872453	1	1	3.17615e-20	seurat_exp_5
57; PPAR-signaling-pathway	PPAR_signaling_pathway	APOA2	Ketogenesis; Lipid metabolism	9.629e-22	0.511327	1	1	6.82696e-19	seurat_exp_5
56; AMPK-signaling-pathway	AMPK_signaling_pathway	FASN	Repressed fatty acid syntheses	1.72318e-21	0.60445	1	1	1.22174e-18	seurat_exp_5
76; PPAR-signaling-pathway	PPAR_signaling_pathway	ME3	Lipogenesis;; Lipid metabolism	3.61665e-21	0.6803	1	1	2.5642e-18	seurat_exp_5
72; PPAR-signaling-pathway	PPAR_signaling_pathway	APOA1	Ketogenesis; Lipid metabolism	4.59248e-21	0.502127	1	1	3.25607e-18	seurat_exp_5
77; Hippo-signaling-pathway	Hippo_signaling_pathway	CCND1	Anti-apoptotic genes; Pro-proliferation genes	5.47865e-21	0.712445	1	1	3.88436e-18	seurat_exp_5
74; Hippo-signaling-pathway	Hippo_signaling_pathway	AXIN1	Anti-apoptotic genes; Pro-proliferation genes	5.84868e-21	0.608241	1	1	4.14671e-18	seurat_exp_5
94; Hippo-signaling-pathway	Hippo_signaling_pathway	GLI2	Anti-apoptotic genes; Pro-proliferation genes	9.60151e-21	0.745854	1	1	6.80747e-18	seurat_exp_5
80; Hippo-signaling-pathway	Hippo_signaling_pathway	BIRC2	Anti-apoptotic genes; Pro-proliferation genes	1.3326e-20	0.561435	1	1	9.44815e-18	seurat_exp_5
37; PPAR-signaling-pathway	PPAR_signaling_pathway	CPT2	Fatty acid oxidation; Lipit metabolism	1.42044e-20	0.526865	1	1	1.00709e-17	seurat_exp_5
60; Hippo-signaling-pathway	Hippo_signaling_pathway	CTGF	Anti-apoptotic genes; Pro-proliferation genes	4.36766e-20	0.542781	1	1	3.09667e-17	seurat_exp_5
132; EGFR-tyrosine-kinase-inhibitor-resistance	EGFR_tyrosine_kinase_inhibitor_resistance	EIF4E	Protein synthesis; Differentiation; Growth; Proliferation; Survival; Motility; Angiogenesis	5.25276e-20	0.775454	1	1	3.72421e-17	seurat_exp_5
62; HIF-1-signaling-pathway	HIF_1_signaling_pathway	NPPA	Increase oxygen delivery; Vascular tone	2.08606e-19	0.910078	1	1	1.47902e-16	seurat_exp_5
43; PPAR-signaling-pathway	PPAR_signaling_pathway	FABP3	Fatty acid transport; Lipid metabolism	2.43878e-19	0.528427	1	1	1.7291e-16	seurat_exp_5
57; AMPK-signaling-pathway	AMPK_signaling_pathway	ACACA	Repressed fatty acid syntheses	9.15777e-19	0.552076	1	1	6.49286e-16	seurat_exp_5
131; EGFR-tyrosine-kinase-inhibitor-resistance	EGFR_tyrosine_kinase_inhibitor_resistance	RPS6	Protein synthesis; Differentiation; Growth; Proliferation; Survival; Motility; Angiogenesis	4.0453e-18	0.714186	1	1	2.86812e-15	seurat_exp_5
29; p53-signaling-pathway	p53_signaling_pathway	IGF1	Apoptosis	4.11025e-18	0.584179	1	1	2.91417e-15	seurat_exp_5
18; mTOR-signaling-pathway	mTOR_signaling_pathway	RHOA	Cytoskeletal organization	4.84495e-18	0.909013	1	1	3.43507e-15	seurat_exp_5
124; MAPK-signaling-pathway	MAPK_signaling_pathway	ATF4	DNA; Proliferation differentiation	1.5104e-17	0.516098	1	1	1.07088e-14	seurat_exp_5
125; Endocrine-resistance	Endocrine_resistance	JUN	DNA; Transcription Proliferation	2.2872e-17	0.506085	1	1	1.62163e-14	seurat_exp_5
70; mTOR-signaling-pathway	mTOR_signaling_pathway	TTI1		5.91008e-17	0.781355	1	1	4.19025e-14	seurat_exp_5
96; Hippo-signaling-pathway	Hippo_signaling_pathway	FGF1	Anti-apoptotic genes; Pro-proliferation genes	1.18746e-16	0.656749	1	1	8.41911e-14	seurat_exp_5
19; NOD-like-receptor-signaling-pathway	NOD_like_receptor_signaling_pathway	IL1B		1.41257e-16	0.87604	1	1	1.00151e-13	seurat_exp_5
58; PPAR-signaling-pathway	PPAR_signaling_pathway	PLTP	Ketogenesis; Lipid metabolism	3.08832e-16	0.740792	1	1	2.18962e-13	seurat_exp_5
100; cGMP-PKG-signaling-pathway	cGMP_PKG_signaling_pathway	BAD	Decreasedrelease of cytochrom C; Decreased activity of caspase -3;Inhibition of apoptosos	4.42863e-16	0.637842	1	1	3.1399e-13	seurat_exp_5
44; Fc-gamma-R-mediated-phagocytosis	Fc_gamma_R_mediated_phagocytosis	GSN	Phagocytosis; Membrane traficking; Particle internalization; Phagosome closure; Phagosome-lysosome fusion	9.80598e-14	0.59549	1	1	6.95244e-11	seurat_exp_5
63; AMPK-signaling-pathway	AMPK_signaling_pathway	PPARG	Inhibited cell growth & protein synthesis	1.00564e-12	0.887335	1	1	7.13002e-10	seurat_exp_5
48; PPAR-signaling-pathway	PPAR_signaling_pathway	HMGCS1	Ketogenesis; Lipid metabolism	2.7524e-12	1.01884	1	1	1.95145e-09	seurat_exp_5
145; Endocrine-resistance	Endocrine_resistance	FOS	DNA; CoA overexpression AP1/SP1 overexpression; Transcription Proliferation	3.82441e-12	0.806992	1	1	2.7115e-09	seurat_exp_5
16; VEGF-signaling-pathway	VEGF_signaling_pathway	HSPB1	Action reorganization; Migration	1.11989e-11	0.70442	1	1	7.94004e-09	seurat_exp_5
50; C-type-lectin-receptor-signaling-pathway	C_type_lectin_receptor_signaling_pathway	IL17D	Tfh cell differentiation	1.17894e-10	0.630203	1	1	8.35872e-08	seurat_exp_5
88; Hippo-signaling-pathway	Hippo_signaling_pathway	ID1	Anti-apoptotic genes; Pro-proliferation genes	1.80928e-10	0.705001	1	1	1.28278e-07	seurat_exp_5
20; NOD-like-receptor-signaling-pathway	NOD_like_receptor_signaling_pathway	IL18		3.60839e-10	1.08664	1	1	2.55835e-07	seurat_exp_5
56; mTOR-signaling-pathway	mTOR_signaling_pathway	EIF4B	Cap-dependent translocation; Protein systhesis	4.53289e-10	0.59053	1	1	3.21382e-07	seurat_exp_5
33; mTOR-signaling-pathway	mTOR_signaling_pathway	RPS6	Ribosome biogenesis; Protein systhesis	4.68331e-10	0.62938	1	1	3.32047e-07	seurat_exp_5
55; C-type-lectin-receptor-signaling-pathway	C_type_lectin_receptor_signaling_pathway	IL10	Th2 cell differentiation	1.44298e-09	0.778151	1	1	1.02307e-06	seurat_exp_5
4; PI3K-Akt-signaling-pathway	PI3K_Akt_signaling_pathway	RPS6	Protein synthesis	1.53499e-09	0.652352	1	1	1.08831e-06	seurat_exp_5
160; C-type-lectin-receptor-signaling-pathway	C_type_lectin_receptor_signaling_pathway	CCL22	Th2 cell differentiation	1.9357e-09	0.779762	1	1	1.37241e-06	seurat_exp_5
5; PI3K-Akt-signaling-pathway	PI3K_Akt_signaling_pathway	EIF4B	Protein synthesis	1.98996e-09	0.721897	1	1	1.41088e-06	seurat_exp_5
61; AMPK-signaling-pathway	AMPK_signaling_pathway	RPS6KB1	Inhibited cell growth & protein synthesis	2.06417e-09	0.967477	1	1	1.4635e-06	seurat_exp_5
2; PI3K-Akt-signaling-pathway	PI3K_Akt_signaling_pathway	EIF4E	Protein synthesis	6.53095e-09	0.679169	1	1	4.63045e-06	seurat_exp_5
161; C-type-lectin-receptor-signaling-pathway	C_type_lectin_receptor_signaling_pathway	CCL17	Th2 cell differentiation	1.74069e-07	0.6811	1	1	0.000123415	seurat_exp_5
123; Endocrine-resistance	Endocrine_resistance	CARM1	DNA; CoA overexpression AP1/SP1 overexpression; Transcription Proliferation	1.38947e-05	0.674559	1	1	0.00985137	seurat_exp_5
7; ErbB-signaling-pathway	ErbB_signaling_pathway	ERBB3	No signaling	1.61723e-05	0.60205	1	1	0.0114661	seurat_exp_5
151; Endocrine-resistance	Endocrine_resistance	NCOR1	DNA; Low levels CoR; Transcription Proliferation	6.08127e-05	0.726804	1	1	0.0431162	seurat_exp_5
52; MAPK-signaling-pathway	MAPK_signaling_pathway	MEF2C	DNA; Proliferation differentiation, inflammation	3.43374e-59	0.788004	1	1	2.43452e-56	seurat_exp_6
74; PPAR-signaling-pathway	PPAR_signaling_pathway	DBI	Fatty acid transport; Lipid metabolism	1.4378e-33	-0.660019	1	1	1.0194e-30	seurat_exp_6
50; HIF-1-signaling-pathway	HIF_1_signaling_pathway	TF	Increase oxygen delivery; Iron metabolism	9.73713e-28	-0.668287	1	1	6.90363e-25	seurat_exp_6
125; Endocrine-resistance	Endocrine_resistance	JUN	DNA; Transcription Proliferation	1.10331e-21	-0.976052	1	1	7.82247e-19	seurat_exp_6
85; Apoptosis	Apoptosis	FASLG	Pro-apoptotic genes	6.70993e-21	0.521036	1	1	4.75734e-18	seurat_exp_6
126; Endocrine-resistance	Endocrine_resistance	FOS	DNA; Transcription Proliferation	2.78745e-20	-0.629262	1	1	1.9763e-17	seurat_exp_6
86; Apoptosis	Apoptosis	BCL2L11	Pro-apoptotic genes	3.3347e-20	0.505551	1	1	2.3643e-17	seurat_exp_6
84; Apoptosis	Apoptosis	FAS	Pro-apoptotic genes	4.89798e-20	0.561944	1	1	3.47267e-17	seurat_exp_6
83; Apoptosis	Apoptosis	TP53	Pro-apoptotic genes	7.90622e-20	0.578156	1	1	5.60551e-17	seurat_exp_6
3; Rap1-signaling-pathway	Rap1_signaling_pathway	MAPK1	Proliferation survival gene activation	1.46218e-19	-0.665584	1	1	1.03668e-16	seurat_exp_6
73; PI3K-Akt-signaling-pathway	PI3K_Akt_signaling_pathway	MAPK1	Cell proliferation Angiogenesis DNA repair	8.78086e-17	-0.603485	1	1	6.22563e-14	seurat_exp_6
36; JAK-STAT-signaling-pathway	JAK_STAT_signaling_pathway	GFAP	Differentation	4.18526e-16	-0.52683	1	1	2.96735e-13	seurat_exp_6
17; Rap1-signaling-pathway	Rap1_signaling_pathway	ACTB	Cell adhesion,migration,polarity	1.90412e-15	-0.617904	1	1	1.35002e-12	seurat_exp_6
38; Fc-gamma-R-mediated-phagocytosis	Fc_gamma_R_mediated_phagocytosis	CFL1	Phagocytosis; Membrane traficking; Particle internalization; Phagosome closure; Phagosome-lysosome fusion	5.17558e-14	-0.545219	1	1	3.66949e-11	seurat_exp_6
65; ErbB-signaling-pathway	ErbB_signaling_pathway	MYC	DNA; Adhesion	1.46771e-12	-0.975195	1	1	1.0406e-09	seurat_exp_6
94; cGMP-PKG-signaling-pathway	cGMP_PKG_signaling_pathway	MAPK1	Platelet activation	6.68085e-12	-0.521861	1	1	4.73673e-09	seurat_exp_6
6; Fc-epsilon-RI-signaling-pathway	Fc_epsilon_RI_signaling_pathway	C00696	Generation of eicosanoids	1.15162e-09	-0.849432	1	1	8.16501e-07	seurat_exp_6
7; Fc-epsilon-RI-signaling-pathway	Fc_epsilon_RI_signaling_pathway	C05952	Generation of eicosanoids	1.15162e-09	-0.849432	1	1	8.16501e-07	seurat_exp_6
8; Fc-epsilon-RI-signaling-pathway	Fc_epsilon_RI_signaling_pathway	C05951	Generation of eicosanoids	1.15162e-09	-0.849432	1	1	8.16501e-07	seurat_exp_6
9; Fc-epsilon-RI-signaling-pathway	Fc_epsilon_RI_signaling_pathway	C02166	Generation of eicosanoids	1.15162e-09	-0.849432	1	1	8.16501e-07	seurat_exp_6
9; Insulin-signaling-pathway	Insulin_signaling_pathway	ELK1	DNA; Proliferation differentiation	3.16745e-09	-0.804725	1	1	2.24572e-06	seurat_exp_6
18; Rap1-signaling-pathway	Rap1_signaling_pathway	CDH1	Cell adhesion,migration,polarity	1.18827e-06	-0.505263	1	1	0.000842485	seurat_exp_6
109; Chemokine-signaling-pathway	Chemokine_signaling_pathway	MAPK1	DNA; Cytokine production; Cellular gowth and differentiation; Cell survival; Migration; Apoptosis	2.53054e-06	-0.688809	1	1	0.00179415	seurat_exp_6
12; Hippo-signaling-pathway	Hippo_signaling_pathway	CTGF	Anti-apoptotic genes; Pro-proliferation genes	6.21094e-05	-0.517336	1	1	0.0440356	seurat_exp_6
74; PPAR-signaling-pathway	PPAR_signaling_pathway	DBI	Fatty acid transport; Lipid metabolism	1.49128e-26	-0.622349	1	1	1.05732e-23	seurat_exp_7
125; Endocrine-resistance	Endocrine_resistance	JUN	DNA; Transcription Proliferation	5.81338e-26	-1.12362	1	1	4.12168e-23	seurat_exp_7
3; Rap1-signaling-pathway	Rap1_signaling_pathway	MAPK1	Proliferation survival gene activation	4.14559e-25	-0.730834	1	1	2.93922e-22	seurat_exp_7
38; Fc-gamma-R-mediated-phagocytosis	Fc_gamma_R_mediated_phagocytosis	CFL1	Phagocytosis; Membrane traficking; Particle internalization; Phagosome closure; Phagosome-lysosome fusion	1.79826e-22	-0.664422	1	1	1.27497e-19	seurat_exp_7
85; Apoptosis	Apoptosis	FASLG	Pro-apoptotic genes	6.78764e-22	0.516678	1	1	4.81243e-19	seurat_exp_7
86; Apoptosis	Apoptosis	BCL2L11	Pro-apoptotic genes	1.97995e-20	0.553015	1	1	1.40379e-17	seurat_exp_7
73; PI3K-Akt-signaling-pathway	PI3K_Akt_signaling_pathway	MAPK1	Cell proliferation Angiogenesis DNA repair	4.49858e-19	-0.624004	1	1	3.1895e-16	seurat_exp_7
83; Apoptosis	Apoptosis	TP53	Pro-apoptotic genes	1.4035e-18	0.500245	1	1	9.95081e-16	seurat_exp_7
126; Endocrine-resistance	Endocrine_resistance	FOS	DNA; Transcription Proliferation	3.18303e-18	-0.801591	1	1	2.25677e-15	seurat_exp_7
50; HIF-1-signaling-pathway	HIF_1_signaling_pathway	TF	Increase oxygen delivery; Iron metabolism	2.00284e-14	-0.559363	1	1	1.42002e-11	seurat_exp_7
36; JAK-STAT-signaling-pathway	JAK_STAT_signaling_pathway	GFAP	Differentation	2.40463e-13	-0.529473	1	1	1.70489e-10	seurat_exp_7
109; Chemokine-signaling-pathway	Chemokine_signaling_pathway	MAPK1	DNA; Cytokine production; Cellular gowth and differentiation; Cell survival; Migration; Apoptosis	4.49363e-13	-0.791639	1	1	3.18599e-10	seurat_exp_7
94; cGMP-PKG-signaling-pathway	cGMP_PKG_signaling_pathway	MAPK1	Platelet activation	5.49487e-13	-0.596002	1	1	3.89586e-10	seurat_exp_7
17; Rap1-signaling-pathway	Rap1_signaling_pathway	ACTB	Cell adhesion,migration,polarity	1.28495e-12	-0.597989	1	1	9.11033e-10	seurat_exp_7
18; Rap1-signaling-pathway	Rap1_signaling_pathway	CDH1	Cell adhesion,migration,polarity	2.5536e-11	-0.631318	1	1	1.8105e-08	seurat_exp_7
65; ErbB-signaling-pathway	ErbB_signaling_pathway	MYC	DNA; Adhesion	1.07214e-10	-0.978902	1	1	7.6015e-08	seurat_exp_7
6; Fc-epsilon-RI-signaling-pathway	Fc_epsilon_RI_signaling_pathway	C00696	Generation of eicosanoids	2.66921e-10	-0.877353	1	1	1.89247e-07	seurat_exp_7
7; Fc-epsilon-RI-signaling-pathway	Fc_epsilon_RI_signaling_pathway	C05952	Generation of eicosanoids	2.66921e-10	-0.877353	1	1	1.89247e-07	seurat_exp_7
8; Fc-epsilon-RI-signaling-pathway	Fc_epsilon_RI_signaling_pathway	C05951	Generation of eicosanoids	2.66921e-10	-0.877353	1	1	1.89247e-07	seurat_exp_7
9; Fc-epsilon-RI-signaling-pathway	Fc_epsilon_RI_signaling_pathway	C02166	Generation of eicosanoids	2.66921e-10	-0.877353	1	1	1.89247e-07	seurat_exp_7
9; Insulin-signaling-pathway	Insulin_signaling_pathway	ELK1	DNA; Proliferation differentiation	1.1201e-09	-0.827419	1	1	7.94148e-07	seurat_exp_7
48; Rap1-signaling-pathway	Rap1_signaling_pathway	PARD3	Cell adhesion,migration,polarity	2.58926e-07	-0.624991	1	1	0.000183578	seurat_exp_7
78; Hippo-signaling-pathway	Hippo_signaling_pathway	SOX2	Anti-apoptotic genes; Pro-proliferation genes	3.88276e-05	-0.826073	1	1	0.0275287	seurat_exp_7
89; Hippo-signaling-pathway	Hippo_signaling_pathway	ID2	Anti-apoptotic genes; Pro-proliferation genes	2.06522e-23	-0.611569	1	1	1.46424e-20	seurat_exp_8
52; MAPK-signaling-pathway	MAPK_signaling_pathway	MEF2C	DNA; Proliferation differentiation, inflammation	3.49574e-21	-0.612907	1	1	2.47848e-18	seurat_exp_8
67; Rap1-signaling-pathway	Rap1_signaling_pathway	AKT3	Proliferation survival gene activation	3.91353e-16	-0.540496	1	1	2.7747e-13	seurat_exp_8
144; cGMP-PKG-signaling-pathway	cGMP_PKG_signaling_pathway	PDE2A		5.62171e-35	0.522803	1	1	3.98579e-32	seurat_exp_9
44; Ras-signaling-pathway	Ras_signaling_pathway	ETS1	Gene expression	2.03119e-24	0.689702	1	1	1.44011e-21	seurat_exp_9
65; ErbB-signaling-pathway	ErbB_signaling_pathway	MYC	DNA; Adhesion	2.69011e-15	0.592915	1	1	1.90729e-12	seurat_exp_9
13; MAPK-signaling-pathway	MAPK_signaling_pathway	STMN1		4.07725e-36	0.751524	1	1	2.89077e-33	seurat_exp_10
63; Ras-signaling-pathway	Ras_signaling_pathway	TIAM1	Effectors	1.3264e-24	0.541098	1	1	9.40417e-22	seurat_exp_10
114; Apoptosis	Apoptosis	HRK	Pro-apoptotic genes	8.13477e-24	0.976326	1	1	5.76755e-21	seurat_exp_10
74; PPAR-signaling-pathway	PPAR_signaling_pathway	DBI	Fatty acid transport; Lipid metabolism	1.7132e-23	-0.640493	1	1	1.21466e-20	seurat_exp_10
97; Ras-signaling-pathway	Ras_signaling_pathway	PAK4...	Cytoskeleton organization; Cell motolity	2.17217e-19	0.564241	1	1	1.54007e-16	seurat_exp_10
164; cGMP-PKG-signaling-pathway	cGMP_PKG_signaling_pathway	PPIF	Cardioprotection	4.44752e-16	-0.680197	1	1	3.15329e-13	seurat_exp_10
86; Apoptosis	Apoptosis	BCL2L11	Pro-apoptotic genes	8.80273e-16	0.664616	1	1	6.24114e-13	seurat_exp_10
85; Apoptosis	Apoptosis	FASLG	Pro-apoptotic genes	3.02518e-15	0.568889	1	1	2.14485e-12	seurat_exp_10
84; Apoptosis	Apoptosis	FAS	Pro-apoptotic genes	7.36144e-15	0.563229	1	1	5.21926e-12	seurat_exp_10
50; HIF-1-signaling-pathway	HIF_1_signaling_pathway	TF	Increase oxygen delivery; Iron metabolism	4.74206e-13	-0.578952	1	1	3.36212e-10	seurat_exp_10
109; cAMP-signaling-pathway	cAMP_signaling_pathway	BDNF	Hyperexcitability cell death/survival(hippocampal neuron)	1.15604e-12	0.542086	1	1	8.19636e-10	seurat_exp_10
56; ErbB-signaling-pathway	ErbB_signaling_pathway	JUN	DNA; Angiogenesis	3.76426e-12	0.674177	1	1	2.66886e-09	seurat_exp_10
40; TNF-signaling-pathway	TNF_signaling_pathway	JUN		7.43364e-12	0.66497	1	1	5.27045e-09	seurat_exp_10
83; Apoptosis	Apoptosis	TP53	Pro-apoptotic genes	7.64556e-11	0.516541	1	1	5.4207e-08	seurat_exp_10
109; Chemokine-signaling-pathway	Chemokine_signaling_pathway	MAPK1	DNA; Cytokine production; Cellular gowth and differentiation; Cell survival; Migration; Apoptosis	3.54064e-78	3.0923	1	1	2.51031e-75	seurat_exp_11
26; T-cell-receptor-signaling-pathway	T_cell_receptor_signaling_pathway	GRB2	?	2.77581e-76	0.959584	1	1	1.96805e-73	seurat_exp_11
6; Fc-epsilon-RI-signaling-pathway	Fc_epsilon_RI_signaling_pathway	C00696	Generation of eicosanoids	5.53561e-71	2.8836	1	1	3.92475e-68	seurat_exp_11
7; Fc-epsilon-RI-signaling-pathway	Fc_epsilon_RI_signaling_pathway	C05952	Generation of eicosanoids	5.53561e-71	2.8836	1	1	3.92475e-68	seurat_exp_11
8; Fc-epsilon-RI-signaling-pathway	Fc_epsilon_RI_signaling_pathway	C05951	Generation of eicosanoids	5.53561e-71	2.8836	1	1	3.92475e-68	seurat_exp_11
9; Fc-epsilon-RI-signaling-pathway	Fc_epsilon_RI_signaling_pathway	C02166	Generation of eicosanoids	5.53561e-71	2.8836	1	1	3.92475e-68	seurat_exp_11
73; PI3K-Akt-signaling-pathway	PI3K_Akt_signaling_pathway	MAPK1	Cell proliferation Angiogenesis DNA repair	6.85033e-71	2.14872	1	1	4.85688e-68	seurat_exp_11
65; ErbB-signaling-pathway	ErbB_signaling_pathway	MYC	DNA; Adhesion	2.67729e-69	2.8785	1	1	1.8982e-66	seurat_exp_11
125; Endocrine-resistance	Endocrine_resistance	JUN	DNA; Transcription Proliferation	1.13716e-68	3.05843	1	1	8.06244e-66	seurat_exp_11
9; Insulin-signaling-pathway	Insulin_signaling_pathway	ELK1	DNA; Proliferation differentiation	1.48406e-67	2.88932	1	1	1.0522e-64	seurat_exp_11
32; Insulin-signaling-pathway	Insulin_signaling_pathway	EIF4E	Protein synthesis	6.16181e-67	2.75189	1	1	4.36872e-64	seurat_exp_11
126; Endocrine-resistance	Endocrine_resistance	FOS	DNA; Transcription Proliferation	1.53457e-65	2.59821	1	1	1.08801e-62	seurat_exp_11
100; PI3K-Akt-signaling-pathway	PI3K_Akt_signaling_pathway	PRKCA	Cglucose uptake; Vesicle transpory	7.16322e-65	1.43172	1	1	5.07872e-62	seurat_exp_11
30; Fc-epsilon-RI-signaling-pathway	Fc_epsilon_RI_signaling_pathway	PRKCA	DNA; Cytokine gene transcription	7.2903e-64	1.6356	1	1	5.16882e-61	seurat_exp_11
12; MAPK-signaling-pathway	MAPK_signaling_pathway	PLA2G4B		2.62411e-63	1.00732	1	1	1.86049e-60	seurat_exp_11
5; T-cell-receptor-signaling-pathway	T_cell_receptor_signaling_pathway	CDK4	Proliferation Differentation; Immuno response	2.87774e-62	2.58815	1	1	2.04032e-59	seurat_exp_11
36; TNF-signaling-pathway	TNF_signaling_pathway	CREB3		6.21853e-61	2.54912	1	1	4.40894e-58	seurat_exp_11
94; cGMP-PKG-signaling-pathway	cGMP_PKG_signaling_pathway	MAPK1	Platelet activation	1.51654e-60	1.57983	1	1	1.07523e-57	seurat_exp_11
3; ErbB-signaling-pathway	ErbB_signaling_pathway	ELK1	DNA; Migration/ Invasion	2.02465e-60	2.94988	1	1	1.43548e-57	seurat_exp_11
42; Ras-signaling-pathway	Ras_signaling_pathway	PLA2G4B	Gene expression	3.44593e-60	1.50505	1	1	2.44316e-57	seurat_exp_11
121; MAPK-signaling-pathway	MAPK_signaling_pathway	MYC		4.10557e-60	0.990528	1	1	2.91085e-57	seurat_exp_11
11; T-cell-receptor-signaling-pathway	T_cell_receptor_signaling_pathway	IL4	Proliferation Differentation; Immuno response	6.50924e-60	2.09273	1	1	4.61505e-57	seurat_exp_11
6; T-cell-receptor-signaling-pathway	T_cell_receptor_signaling_pathway	TNF	Proliferation Differentation; Immuno response	1.71062e-59	2.09664	1	1	1.21283e-56	seurat_exp_11
7; T-cell-receptor-signaling-pathway	T_cell_receptor_signaling_pathway	CSF2	Proliferation Differentation; Immuno response	1.71062e-59	2.09664	1	1	1.21283e-56	seurat_exp_11
8; T-cell-receptor-signaling-pathway	T_cell_receptor_signaling_pathway	IFNG	Proliferation Differentation; Immuno response	1.71062e-59	2.09664	1	1	1.21283e-56	seurat_exp_11
9; T-cell-receptor-signaling-pathway	T_cell_receptor_signaling_pathway	IL10	Proliferation Differentation; Immuno response	1.71062e-59	2.09664	1	1	1.21283e-56	seurat_exp_11
10; T-cell-receptor-signaling-pathway	T_cell_receptor_signaling_pathway	IL5	Proliferation Differentation; Immuno response	2.82966e-59	2.08457	1	1	2.00623e-56	seurat_exp_11
24; B-cell-receptor-signaling-pathway	B_cell_receptor_signaling_pathway	FOS	DNA; B cell ontogeny; Autoimmunity; Anergy; Immuno response Ig production GC formation	5.42884e-59	2.15568	1	1	3.84905e-56	seurat_exp_11
12; T-cell-receptor-signaling-pathway	T_cell_receptor_signaling_pathway	IL2	Proliferation Differentation; Immuno response	1.28303e-58	2.13662	1	1	9.09666e-56	seurat_exp_11
89; HIF-1-signaling-pathway	HIF_1_signaling_pathway	CDKN1A	Reduce oxygen consumption; Regulate proliferation and apoptosis	1.28621e-55	1.42384	1	1	9.11926e-53	seurat_exp_11
121; Chemokine-signaling-pathway	Chemokine_signaling_pathway	NFKB1	DNA; Cytokine production; Cellular gowth and differentiation; Cell survival; Migration; Apoptosis	1.87676e-55	1.2696	1	1	1.33062e-52	seurat_exp_11
58; Fc-gamma-R-mediated-phagocytosis	Fc_gamma_R_mediated_phagocytosis	C00219	Phagocytosis; Membrane remodeling; Focal exocytosis; Pseudopod extention; Particle internalization	9.45457e-55	1.48464	1	1	6.70329e-52	seurat_exp_11
75; Chemokine-signaling-pathway	Chemokine_signaling_pathway	WAS		1.14144e-54	1.09637	1	1	8.09279e-52	seurat_exp_11
124; MAPK-signaling-pathway	MAPK_signaling_pathway	ATF4	DNA; Proliferation differentiation	2.90039e-54	1.30496	1	1	2.05638e-51	seurat_exp_11
30; JAK-STAT-signaling-pathway	JAK_STAT_signaling_pathway	CDKN1A	Cell-cycle inhibition	3.47932e-54	1.11861	1	1	2.46684e-51	seurat_exp_11
43; Ras-signaling-pathway	Ras_signaling_pathway	ELK1	Gene expression	1.09372e-53	1.67208	1	1	7.7545e-51	seurat_exp_11
3; Rap1-signaling-pathway	Rap1_signaling_pathway	MAPK1	Proliferation survival gene activation	1.15155e-53	1.7458	1	1	8.16449e-51	seurat_exp_11
91; Chemokine-signaling-pathway	Chemokine_signaling_pathway	PRKACA		6.97743e-53	-0.570172	1	1	4.947e-50	seurat_exp_11
52; Fc-gamma-R-mediated-phagocytosis	Fc_gamma_R_mediated_phagocytosis	AMPH	Phagocytosis; Membrane remodeling; Focal exocytosis; Pseudopod extention; Particle internalization	8.97695e-53	1.15078	1	1	6.36466e-50	seurat_exp_11
87; Wnt-signaling-pathway	Wnt_signaling_pathway	WISP1		9.18487e-53	1.09074	1	1	6.51207e-50	seurat_exp_11
13; MAPK-signaling-pathway	MAPK_signaling_pathway	STMN1		3.35693e-52	1.03154	1	1	2.38006e-49	seurat_exp_11
49; Wnt-signaling-pathway	Wnt_signaling_pathway	RBX1	Proteolysis	1.23743e-51	1.67163	1	1	8.77335e-49	seurat_exp_11
14; Chemokine-signaling-pathway	Chemokine_signaling_pathway	PXN		1.26797e-51	0.935656	1	1	8.98987e-49	seurat_exp_11
80; Hippo-signaling-pathway	Hippo_signaling_pathway	BIRC2	Anti-apoptotic genes; Pro-proliferation genes	5.3071e-50	1.98974	1	1	3.76273e-47	seurat_exp_11
12; p53-signaling-pathway	p53_signaling_pathway	CCNE1	G1 arrest( sustaines); Cell cycle arrest	6.79084e-49	-0.718715	1	1	4.8147e-46	seurat_exp_11
76; Hippo-signaling-pathway	Hippo_signaling_pathway	MYC	Anti-apoptotic genes; Pro-proliferation genes	1.84753e-48	1.81555	1	1	1.3099e-45	seurat_exp_11
79; Hippo-signaling-pathway	Hippo_signaling_pathway	SNAI2	Anti-apoptotic genes; Pro-proliferation genes	8.37842e-48	1.78838	1	1	5.9403e-45	seurat_exp_11
108; Chemokine-signaling-pathway	Chemokine_signaling_pathway	STAT1	DNA; Cytokine production; Cellular gowth and differentiation; Cell survival Migration; Apoptosis	1.07143e-47	0.543922	1	1	7.59645e-45	seurat_exp_11
15; MAPK-signaling-pathway	MAPK_signaling_pathway	NFKB1	Proliferation inflammation anti-apoptosis	2.33586e-47	1.10686	1	1	1.65612e-44	seurat_exp_11
44; Ras-signaling-pathway	Ras_signaling_pathway	ETS1	Gene expression	3.75323e-47	1.24609	1	1	2.66104e-44	seurat_exp_11
47; Chemokine-signaling-pathway	Chemokine_signaling_pathway	CRK		6.01425e-47	0.857169	1	1	4.2641e-44	seurat_exp_11
74; Hippo-signaling-pathway	Hippo_signaling_pathway	AXIN1	Anti-apoptotic genes; Pro-proliferation genes	2.43883e-46	2.21871	1	1	1.72913e-43	seurat_exp_11
78; Hippo-signaling-pathway	Hippo_signaling_pathway	SOX2	Anti-apoptotic genes; Pro-proliferation genes	2.90392e-46	2.61585	1	1	2.05888e-43	seurat_exp_11
56; mTOR-signaling-pathway	mTOR_signaling_pathway	EIF4B	Cap-dependent translocation; Protein systhesis	3.89259e-45	2.0239	1	1	2.75984e-42	seurat_exp_11
119; Apoptosis	Apoptosis	BCL2	Pro-survival genes	4.38274e-45	0.945474	1	1	3.10736e-42	seurat_exp_11
16; Wnt-signaling-pathway	Wnt_signaling_pathway	CAMK2A	DNA	7.40092e-45	0.690229	1	1	5.24725e-42	seurat_exp_11
27; Ras-signaling-pathway	Ras_signaling_pathway	ABL1	Cytoskeletal remodelling	3.18906e-44	1.04113	1	1	2.26105e-41	seurat_exp_11
31; Wnt-signaling-pathway	Wnt_signaling_pathway	MMP7		4.15739e-44	0.758263	1	1	2.94759e-41	seurat_exp_11
34; Wnt-signaling-pathway	Wnt_signaling_pathway	FOSL1		4.15739e-44	0.758263	1	1	2.94759e-41	seurat_exp_11
46; HIF-1-signaling-pathway	HIF_1_signaling_pathway	ENO1	Reduce oxygen consumption; Promote anaerobic metabolism	1.00521e-43	0.906766	1	1	7.12695e-41	seurat_exp_11
28; Calcium-signaling-pathway	Calcium_signaling_pathway	PTK2B	Other signaling pathways	2.13474e-43	0.57231	1	1	1.51353e-40	seurat_exp_11
43; FoxO-signaling-pathway	FoxO_signaling_pathway	CDKN1A	Cell cycle regulation	2.43244e-43	0.786829	1	1	1.7246e-40	seurat_exp_11
75; Hippo-signaling-pathway	Hippo_signaling_pathway	NKD1	Anti-apoptotic genes; Pro-proliferation genes	3.93738e-43	1.69986	1	1	2.7916e-40	seurat_exp_11
16; mTOR-signaling-pathway	mTOR_signaling_pathway	LPIN1	Lipid biosynthesis	7.37539e-43	1.62843	1	1	5.22915e-40	seurat_exp_11
18; Rap1-signaling-pathway	Rap1_signaling_pathway	CDH1	Cell adhesion,migration,polarity	7.38707e-43	1.34419	1	1	5.23743e-40	seurat_exp_11
111; cGMP-PKG-signaling-pathway	cGMP_PKG_signaling_pathway	GTF2I	Transcription	4.90972e-42	0.696195	1	1	3.48099e-39	seurat_exp_11
35; Wnt-signaling-pathway	Wnt_signaling_pathway	JUN		9.07819e-42	1.07064	1	1	6.43644e-39	seurat_exp_11
63; Ras-signaling-pathway	Ras_signaling_pathway	TIAM1	Effectors	8.23902e-41	0.802502	1	1	5.84147e-38	seurat_exp_11
139; Chemokine-signaling-pathway	Chemokine_signaling_pathway	GSK3A...		1.0383e-40	-0.576696	1	1	7.36151e-38	seurat_exp_11
44; HIF-1-signaling-pathway	HIF_1_signaling_pathway	GAPDH	Reduce oxygen consumption; Promote anaerobic metabolism	1.5746e-39	0.850671	1	1	1.11639e-36	seurat_exp_11
33; mTOR-signaling-pathway	mTOR_signaling_pathway	RPS6	Ribosome biogenesis; Protein systhesis	2.15517e-39	1.57171	1	1	1.52802e-36	seurat_exp_11
48; Rap1-signaling-pathway	Rap1_signaling_pathway	PARD3	Cell adhesion,migration,polarity	3.07564e-39	1.60308	1	1	2.18063e-36	seurat_exp_11
77; Hippo-signaling-pathway	Hippo_signaling_pathway	CCND1	Anti-apoptotic genes; Pro-proliferation genes	3.69825e-39	1.63904	1	1	2.62206e-36	seurat_exp_11
119; MAPK-signaling-pathway	MAPK_signaling_pathway	FOS	DNA; Proliferation differentiation	6.39308e-39	1.01438	1	1	4.53269e-36	seurat_exp_11
97; Ras-signaling-pathway	Ras_signaling_pathway	PAK4...	Cytoskeleton organization; Cell motolity	6.63826e-39	0.888098	1	1	4.70652e-36	seurat_exp_11
36; Wnt-signaling-pathway	Wnt_signaling_pathway	MYC		7.82117e-39	0.756111	1	1	5.54521e-36	seurat_exp_11
64; HIF-1-signaling-pathway	HIF_1_signaling_pathway	LTBR	Inflammantion	1.07708e-38	0.854335	1	1	7.63647e-36	seurat_exp_11
53; HIF-1-signaling-pathway	HIF_1_signaling_pathway	EGF	Increase oxygen delivery; Angiogenesis	1.32083e-38	0.800141	1	1	9.36466e-36	seurat_exp_11
14; Wnt-signaling-pathway	Wnt_signaling_pathway	PRKCA	DNA	3.43854e-38	0.631936	1	1	2.43792e-35	seurat_exp_11
62; mTOR-signaling-pathway	mTOR_signaling_pathway	TTI1		5.67862e-38	1.49783	1	1	4.02614e-35	seurat_exp_11
31; mTOR-signaling-pathway	mTOR_signaling_pathway	EIF4E	Cap-dependent translocation; Protein systhesis	6.35751e-38	1.79896	1	1	4.50747e-35	seurat_exp_11
23; p53-signaling-pathway	p53_signaling_pathway	PTEN	Inhibition of IGF-1/mTOR pathway	1.22286e-37	0.699346	1	1	8.67007e-35	seurat_exp_11
54; HIF-1-signaling-pathway	HIF_1_signaling_pathway	SERPINE1	Increase oxygen delivery; Angiogenesis	1.35178e-37	0.794303	1	1	9.58416e-35	seurat_exp_11
19; mTOR-signaling-pathway	mTOR_signaling_pathway	PRKCA	Cytoskeletal organization	1.4598e-37	1.3061	1	1	1.035e-34	seurat_exp_11
49; HIF-1-signaling-pathway	HIF_1_signaling_pathway	EPO	Increase oxygen delivery; Erythropoiesis	2.24974e-37	0.762617	1	1	1.59506e-34	seurat_exp_11
81; mTOR-signaling-pathway	mTOR_signaling_pathway	CLIP1	Microtubule organization	2.75292e-37	1.77613	1	1	1.95182e-34	seurat_exp_11
14; MAPK-signaling-pathway	MAPK_signaling_pathway	MAPT		3.37276e-37	0.799238	1	1	2.39129e-34	seurat_exp_11
59; HIF-1-signaling-pathway	HIF_1_signaling_pathway	NOS2	Increase oxygen delivery; Vascular tone	3.92988e-37	0.755994	1	1	2.78628e-34	seurat_exp_11
57; HIF-1-signaling-pathway	HIF_1_signaling_pathway	TIMP1	Increase oxygen delivery; Angiogenesis	4.04706e-37	0.758098	1	1	2.86937e-34	seurat_exp_11
63; HIF-1-signaling-pathway	HIF_1_signaling_pathway	TIMP1	Matrix and barrier functions	4.04706e-37	0.758098	1	1	2.86937e-34	seurat_exp_11
58; HIF-1-signaling-pathway	HIF_1_signaling_pathway	EDN1	Increase oxygen delivery; Vascular tone	2.09545e-36	0.781028	1	1	1.48568e-33	seurat_exp_11
53; mTOR-signaling-pathway	mTOR_signaling_pathway	GRB10	Lipolysis	2.23389e-36	1.46499	1	1	1.58383e-33	seurat_exp_11
32; Wnt-signaling-pathway	Wnt_signaling_pathway	PPARD		3.17454e-36	0.867028	1	1	2.25075e-33	seurat_exp_11
23; ErbB-signaling-pathway	ErbB_signaling_pathway	RPS6KB1	Protein synthesis	5.73108e-36	1.42055	1	1	4.06334e-33	seurat_exp_11
55; HIF-1-signaling-pathway	HIF_1_signaling_pathway	ANGPT1	Increase oxygen delivery; Angiogenesis	9.84481e-36	0.753724	1	1	6.97997e-33	seurat_exp_11
61; HIF-1-signaling-pathway	HIF_1_signaling_pathway	HMOX1	Increase oxygen delivery; Vascular tone	1.21997e-35	0.762252	1	1	8.64955e-33	seurat_exp_11
62; HIF-1-signaling-pathway	HIF_1_signaling_pathway	NPPA	Increase oxygen delivery; Vascular tone	9.53631e-35	0.710411	1	1	6.76124e-32	seurat_exp_11
32; mTOR-signaling-pathway	mTOR_signaling_pathway	ULK1	Autophagy	1.36127e-34	-0.771814	1	1	9.65142e-32	seurat_exp_11
60; HIF-1-signaling-pathway	HIF_1_signaling_pathway	NOS3	Increase oxygen delivery; Vascular tone	4.45884e-34	0.796695	1	1	3.16132e-31	seurat_exp_11
58; p53-signaling-pathway	p53_signaling_pathway	CASP3	Apoptosis	9.62552e-34	1.03475	1	1	6.82449e-31	seurat_exp_11
44; T-cell-receptor-signaling-pathway	T_cell_receptor_signaling_pathway	PAK4...		1.13668e-33	0.566549	1	1	8.05906e-31	seurat_exp_11
51; RIG-I-like-receptor-signaling-pathway	RIG_I_like_receptor_signaling_pathway	CXCL8	Inflammatory cytokines; Protein synthesis; Growth arrest; Dendrition cell activation; NK cell activation; Antibody production; Apoptosis	1.3974e-33	1.03553	1	1	9.90755e-31	seurat_exp_11
52; RIG-I-like-receptor-signaling-pathway	RIG_I_like_receptor_signaling_pathway	TNF	Inflammatory cytokines; Protein synthesis; Growth arrest; Dendrition cell activation; NK cell activation; Antibody production; Apoptosis	1.3974e-33	1.03553	1	1	9.90755e-31	seurat_exp_11
54; RIG-I-like-receptor-signaling-pathway	RIG_I_like_receptor_signaling_pathway	CXCL10	Inflammatory cytokines; Protein synthesis; Growth arrest; Dendrition cell activation; NK cell activation; Antibody production; Apoptosis	2.56364e-33	1.01996	1	1	1.81762e-30	seurat_exp_11
53; p53-signaling-pathway	p53_signaling_pathway	CCND1	G1 arrest( sustaines); Cell cycle arrest	3.29934e-33	-0.57436	1	1	2.33923e-30	seurat_exp_11
100; Ras-signaling-pathway	Ras_signaling_pathway	REL	Gene expression	1.16728e-32	1.17256	1	1	8.27603e-30	seurat_exp_11
53; RIG-I-like-receptor-signaling-pathway	RIG_I_like_receptor_signaling_pathway	IL12A	Inflammatory cytokines; Protein synthesis; Growth arrest; Dendrition cell activation; NK cell activation; Antibody production; Apoptosis	1.22474e-32	1.04226	1	1	8.68342e-30	seurat_exp_11
13; Wnt-signaling-pathway	Wnt_signaling_pathway	NFATC1	DNA	1.5153e-32	0.567733	1	1	1.07435e-29	seurat_exp_11
45; HIF-1-signaling-pathway	HIF_1_signaling_pathway	ALDOA	Reduce oxygen consumption; Promote anaerobic metabolism	3.36008e-32	0.784974	1	1	2.3823e-29	seurat_exp_11
88; HIF-1-signaling-pathway	HIF_1_signaling_pathway	BCL2	Reduce oxygen consumption; Regulate proliferation and apoptosis	4.58473e-32	0.730405	1	1	3.25057e-29	seurat_exp_11
82; Rap1-signaling-pathway	Rap1_signaling_pathway	ITGA2B	Cell adhesion,migration,polarity	4.69847e-32	0.936757	1	1	3.33121e-29	seurat_exp_11
56; HIF-1-signaling-pathway	HIF_1_signaling_pathway	TEK	Increase oxygen delivery; Angiogenesis	5.02248e-32	0.770912	1	1	3.56094e-29	seurat_exp_11
48; HIF-1-signaling-pathway	HIF_1_signaling_pathway	PFKFB3	Reduce oxygen consumption; Promote anaerobic metabolism	2.19314e-31	0.793228	1	1	1.55494e-28	seurat_exp_11
42; HIF-1-signaling-pathway	HIF_1_signaling_pathway	HK1	Reduce oxygen consumption; Promote anaerobic metabolism	4.3681e-31	0.67084	1	1	3.09698e-28	seurat_exp_11
24; Ras-signaling-pathway	Ras_signaling_pathway	PLD1	Endocytosis	6.24366e-31	0.75362	1	1	4.42675e-28	seurat_exp_11
4; NF-kappa-B-signaling-pathway	NF_kappa_B_signaling_pathway	BIRC2	Survival	4.02357e-30	1.43403	1	1	2.85271e-27	seurat_exp_11
20; Cell-cycle	Cell_cycle	MCM2	DNA; DNA biosynthesis	4.2024e-30	2.04524	1	1	2.9795e-27	seurat_exp_11
57; ErbB-signaling-pathway	ErbB_signaling_pathway	ABL1		5.4862e-30	0.617685	1	1	3.88972e-27	seurat_exp_11
67; Rap1-signaling-pathway	Rap1_signaling_pathway	AKT3	Proliferation survival gene activation	2.48145e-29	0.828144	1	1	1.75935e-26	seurat_exp_11
171; NOD-like-receptor-signaling-pathway	NOD_like_receptor_signaling_pathway	TNF	Pro-inflammatory cytokines	1.39065e-28	0.848667	1	1	9.85974e-26	seurat_exp_11
172; NOD-like-receptor-signaling-pathway	NOD_like_receptor_signaling_pathway	CXCL8	Chemokines	1.39065e-28	0.848667	1	1	9.85974e-26	seurat_exp_11
173; NOD-like-receptor-signaling-pathway	NOD_like_receptor_signaling_pathway	CXCL1	Chemokines	1.39065e-28	0.848667	1	1	9.85974e-26	seurat_exp_11
113; NF-kappa-B-signaling-pathway	NF_kappa_B_signaling_pathway	CFLAR	Survival	1.45261e-28	1.3885	1	1	1.0299e-25	seurat_exp_11
35; Ras-signaling-pathway	Ras_signaling_pathway	NFKB1	Cell survival; Cell growth; Cell migration; Cell cycle progression; Transcription	1.52902e-28	0.697655	1	1	1.08408e-25	seurat_exp_11
170; NOD-like-receptor-signaling-pathway	NOD_like_receptor_signaling_pathway	IL6	Pro-inflammatory cytokines	1.99545e-28	0.843228	1	1	1.41477e-25	seurat_exp_11
142; NF-kappa-B-signaling-pathway	NF_kappa_B_signaling_pathway	NFKB2	Activation of noncanonical pathway	2.44489e-28	1.6006	1	1	1.73343e-25	seurat_exp_11
51; HIF-1-signaling-pathway	HIF_1_signaling_pathway	TFRC	Increase oxygen delivery; Iron metabolism	3.03301e-28	0.852611	1	1	2.1504e-25	seurat_exp_11
174; NOD-like-receptor-signaling-pathway	NOD_like_receptor_signaling_pathway	CCL2	Chemokines	3.12321e-28	0.843125	1	1	2.21436e-25	seurat_exp_11
105; cGMP-PKG-signaling-pathway	cGMP_PKG_signaling_pathway	SLC8A2		4.47105e-28	0.548124	1	1	3.16997e-25	seurat_exp_11
52; NF-kappa-B-signaling-pathway	NF_kappa_B_signaling_pathway	TRAF1	Survival	4.68022e-28	1.30628	1	1	3.31828e-25	seurat_exp_11
183; NOD-like-receptor-signaling-pathway	NOD_like_receptor_signaling_pathway	CAMP	Antimicrobial peptides; Defensins	4.71005e-28	0.822791	1	1	3.33943e-25	seurat_exp_11
115; cAMP-signaling-pathway	cAMP_signaling_pathway	F2R	Regulation of vascular actions of thrombin (vascular mooth muscle cell)	4.93656e-28	0.578601	1	1	3.50002e-25	seurat_exp_11
13; VEGF-signaling-pathway	VEGF_signaling_pathway	C01312	PGI2production	5.13468e-28	1.08426	1	1	3.64049e-25	seurat_exp_11
178; NOD-like-receptor-signaling-pathway	NOD_like_receptor_signaling_pathway	IL1B	Pro-inflammatory cytokines	6.50008e-28	0.830689	1	1	4.60856e-25	seurat_exp_11
51; NF-kappa-B-signaling-pathway	NF_kappa_B_signaling_pathway	TNFAIP3	Negative feedback	6.53308e-28	1.37058	1	1	4.63195e-25	seurat_exp_11
53; NF-kappa-B-signaling-pathway	NF_kappa_B_signaling_pathway	CXCL8	Survival	7.88874e-28	1.26872	1	1	5.59311e-25	seurat_exp_11
115; NF-kappa-B-signaling-pathway	NF_kappa_B_signaling_pathway	XIAP	Survival	7.88874e-28	1.26872	1	1	5.59311e-25	seurat_exp_11
130; NF-kappa-B-signaling-pathway	NF_kappa_B_signaling_pathway	TNF	Positive feedback	7.88874e-28	1.26872	1	1	5.59311e-25	seurat_exp_11
133; NF-kappa-B-signaling-pathway	NF_kappa_B_signaling_pathway	CXCL2	Inflammation	7.88874e-28	1.26872	1	1	5.59311e-25	seurat_exp_11
33; JAK-STAT-signaling-pathway	JAK_STAT_signaling_pathway	RAF1	Proliferation Differentation	8.45677e-28	1.23631	1	1	5.99585e-25	seurat_exp_11
24; JAK-STAT-signaling-pathway	JAK_STAT_signaling_pathway	MCL1	Anti-apoptosis	1.05184e-27	0.517619	1	1	7.45755e-25	seurat_exp_11
114; NF-kappa-B-signaling-pathway	NF_kappa_B_signaling_pathway	BCL2A1	Survival	1.08584e-27	1.2962	1	1	7.69863e-25	seurat_exp_11
161; Chemokine-signaling-pathway	Chemokine_signaling_pathway	BAD		1.10519e-27	-0.558036	1	1	7.83578e-25	seurat_exp_11
131; NF-kappa-B-signaling-pathway	NF_kappa_B_signaling_pathway	CCL4L1	Inflammation	1.3234e-27	1.25828	1	1	9.38293e-25	seurat_exp_11
99; PI3K-Akt-signaling-pathway	PI3K_Akt_signaling_pathway	MYB	Cell survival	1.47284e-27	0.567404	1	1	1.04424e-24	seurat_exp_11
128; NF-kappa-B-signaling-pathway	NF_kappa_B_signaling_pathway	IL1B	Positive feedback	2.10423e-27	1.25201	1	1	1.4919e-24	seurat_exp_11
8; ErbB-signaling-pathway	ErbB_signaling_pathway	STAT5A	DNA;Differentiation	2.46808e-27	0.614617	1	1	1.74987e-24	seurat_exp_11
22; ErbB-signaling-pathway	ErbB_signaling_pathway	EIF4EBP1	Protein synthesis	4.01771e-27	-0.676332	1	1	2.84855e-24	seurat_exp_11
3; NF-kappa-B-signaling-pathway	NF_kappa_B_signaling_pathway	BCL2	Survival	5.27182e-27	1.18492	1	1	3.73772e-24	seurat_exp_11
175; NOD-like-receptor-signaling-pathway	NOD_like_receptor_signaling_pathway	CCL5	Chemokines	9.35646e-27	0.860371	1	1	6.63373e-24	seurat_exp_11
42; Fc-gamma-R-mediated-phagocytosis	Fc_gamma_R_mediated_phagocytosis	MYO10	Phagocytosis; Membrane remodeling; Focal exocytosis; Pseudopod extention; Particle internalization	1.22675e-26	0.536389	1	1	8.69769e-24	seurat_exp_11
138; Chemokine-signaling-pathway	Chemokine_signaling_pathway	FOXO3	DNA; Cytokine production; Cellular gowth and differentiation; Cell survival; Migration; Apoptosis	1.28266e-26	-0.516612	1	1	9.09405e-24	seurat_exp_11
71; Apoptosis	Apoptosis	GADD45G	Pro-survival genes	2.13672e-26	0.863072	1	1	1.51493e-23	seurat_exp_11
14; Rap1-signaling-pathway	Rap1_signaling_pathway	MAPK14	Proliferation survival gene activation	2.56299e-26	0.77253	1	1	1.81716e-23	seurat_exp_11
182; NOD-like-receptor-signaling-pathway	NOD_like_receptor_signaling_pathway	C16054...		2.6364e-26	0.828485	1	1	1.86921e-23	seurat_exp_11
10; Apoptosis	Apoptosis	BIRC2	Pro-survival genes	3.06962e-26	0.777643	1	1	2.17636e-23	seurat_exp_11
45; RIG-I-like-receptor-signaling-pathway	RIG_I_like_receptor_signaling_pathway	MAPK14	DNA; Inflammatory cytokines; Protein synthesis; Growth arrest; Dendrition cell activation; NK cell activation; Antibody production; Apoptosis	5.28615e-26	0.547891	1	1	3.74788e-23	seurat_exp_11
95; Rap1-signaling-pathway	Rap1_signaling_pathway	THBS1	Defective angiogensis	5.8399e-26	0.968424	1	1	4.14049e-23	seurat_exp_11
132; NF-kappa-B-signaling-pathway	NF_kappa_B_signaling_pathway	VCAM1	Inflammation	9.8413e-26	1.19517	1	1	6.97748e-23	seurat_exp_11
129; NF-kappa-B-signaling-pathway	NF_kappa_B_signaling_pathway	PTGS2	Inflammation	9.96146e-26	1.17241	1	1	7.06268e-23	seurat_exp_11
25; Fc-epsilon-RI-signaling-pathway	Fc_epsilon_RI_signaling_pathway	MAPK14	DNA; Cytokine gene transcription	2.422e-25	0.501033	1	1	1.7172e-22	seurat_exp_11
23; Fc-epsilon-RI-signaling-pathway	Fc_epsilon_RI_signaling_pathway	AKT3	DNA; Cytokine gene transcription	2.77473e-25	0.524806	1	1	1.96728e-22	seurat_exp_11
69; Apoptosis	Apoptosis	PTPN13	Pro-survival genes	3.49872e-25	0.833315	1	1	2.48059e-22	seurat_exp_11
17; Rap1-signaling-pathway	Rap1_signaling_pathway	ACTB	Cell adhesion,migration,polarity	3.75984e-25	0.920605	1	1	2.66573e-22	seurat_exp_11
26; Ras-signaling-pathway	Ras_signaling_pathway	PRKCA		4.08406e-25	0.561903	1	1	2.8956e-22	seurat_exp_11
169; NOD-like-receptor-signaling-pathway	NOD_like_receptor_signaling_pathway	IL18	Pro-inflammatory cytokines	4.72652e-25	0.928116	1	1	3.3511e-22	seurat_exp_11
70; mTOR-signaling-pathway	mTOR_signaling_pathway	TTI1		7.27434e-25	1.04801	1	1	5.15751e-22	seurat_exp_11
70; Apoptosis	Apoptosis	CFLAR	Pro-survival genes	7.33528e-25	0.784991	1	1	5.20071e-22	seurat_exp_11
2; NF-kappa-B-signaling-pathway	NF_kappa_B_signaling_pathway	BCL2L1	Survival	8.18496e-25	1.39086	1	1	5.80314e-22	seurat_exp_11
50; NF-kappa-B-signaling-pathway	NF_kappa_B_signaling_pathway	NFKBIA	Negative feedback	1.27047e-24	1.50321	1	1	9.00764e-22	seurat_exp_11
96; Rap1-signaling-pathway	Rap1_signaling_pathway	PLCE1	Proliferation survival gene activation	1.70823e-24	0.588772	1	1	1.21113e-21	seurat_exp_11
7; Apoptosis	Apoptosis	ENDOG	DNA fragmentation; Apoptosis	1.78041e-24	0.881418	1	1	1.26231e-21	seurat_exp_11
72; Apoptosis	Apoptosis	BCL2A1	Pro-survival genes	3.68745e-24	0.71999	1	1	2.61441e-21	seurat_exp_11
116; NF-kappa-B-signaling-pathway	NF_kappa_B_signaling_pathway	GADD45B	Survival	4.4021e-24	1.27064	1	1	3.12109e-21	seurat_exp_11
18; RIG-I-like-receptor-signaling-pathway	RIG_I_like_receptor_signaling_pathway	IFNA1	Type 1 interfeons; Protein synthesis; Growth arrest; Dendrition cell activation; NK cell activation; Antibody production; Apoptosis	1.03581e-23	0.731693	1	1	7.34392e-21	seurat_exp_11
19; RIG-I-like-receptor-signaling-pathway	RIG_I_like_receptor_signaling_pathway	IFNB1	Type 1 interfeons; Protein synthesis; Growth arrest; Dendrition cell activation; NK cell activation; Antibody production; Apoptosis	1.03581e-23	0.731693	1	1	7.34392e-21	seurat_exp_11
48; RIG-I-like-receptor-signaling-pathway	RIG_I_like_receptor_signaling_pathway	IFNW1	Type 1 interfeons; Protein synthesis; Growth arrest; Dendrition cell activation; NK cell activation; Antibody production; Apoptosis	1.03581e-23	0.731693	1	1	7.34392e-21	seurat_exp_11
49; RIG-I-like-receptor-signaling-pathway	RIG_I_like_receptor_signaling_pathway	IFNE	Type 1 interfeons; Protein synthesis; Growth arrest; Dendrition cell activation; NK cell activation; Antibody production; Apoptosis	1.03581e-23	0.731693	1	1	7.34392e-21	seurat_exp_11
50; RIG-I-like-receptor-signaling-pathway	RIG_I_like_receptor_signaling_pathway	IFNK	Type 1 interfeons; Protein synthesis; Growth arrest; Dendrition cell activation; NK cell activation; Antibody production; Apoptosis	1.03581e-23	0.731693	1	1	7.34392e-21	seurat_exp_11
54; Ras-signaling-pathway	Ras_signaling_pathway	RHOA	Cytoskeleton organization; Cell motolity	1.09525e-23	0.724158	1	1	7.7653e-21	seurat_exp_11
55; Ras-signaling-pathway	Ras_signaling_pathway	AFDN	Cell-cell junctions	2.30317e-23	0.512376	1	1	1.63294e-20	seurat_exp_11
73; Apoptosis	Apoptosis	TRAF1	Pro-survival genes	4.7461e-23	0.775307	1	1	3.36499e-20	seurat_exp_11
155; Chemokine-signaling-pathway	Chemokine_signaling_pathway	PXN	Migration	6.01436e-23	0.621938	1	1	4.26418e-20	seurat_exp_11
5; PI3K-Akt-signaling-pathway	PI3K_Akt_signaling_pathway	EIF4B	Protein synthesis	1.58835e-22	0.686775	1	1	1.12614e-19	seurat_exp_11
12; Toll-like-receptor-signaling-pathway	Toll_like_receptor_signaling_pathway	NFKB1	Degradation	1.91617e-22	0.777309	1	1	1.35857e-19	seurat_exp_11
51; Fc-gamma-R-mediated-phagocytosis	Fc_gamma_R_mediated_phagocytosis	NCF1	NADPH oxidase; Digestion of bacterium; Respiratory burst in phagosome	2.14521e-22	0.544086	1	1	1.52095e-19	seurat_exp_11
90; Hippo-signaling-pathway	Hippo_signaling_pathway	BBC3	Proapoptotic genes	2.15006e-22	0.703311	1	1	1.52439e-19	seurat_exp_11
5; HIF-1-signaling-pathway	HIF_1_signaling_pathway	VEGFA	Increase oxygen delivery; Angiogenesis	2.60116e-22	0.693891	1	1	1.84422e-19	seurat_exp_11
59; cAMP-signaling-pathway	cAMP_signaling_pathway	AFDN	Cytoskeletal rearrangenent((vascular endothelial cell)	3.15281e-22	0.546911	1	1	2.23535e-19	seurat_exp_11
47; HIF-1-signaling-pathway	HIF_1_signaling_pathway	PGK1	Reduce oxygen consumption; Promote anaerobic metabolism	5.877e-22	0.571894	1	1	4.16679e-19	seurat_exp_11
33; Wnt-signaling-pathway	Wnt_signaling_pathway	CCND1		6.5634e-22	0.647551	1	1	4.65345e-19	seurat_exp_11
54; AMPK-signaling-pathway	AMPK_signaling_pathway	SLC2A4	Activated mitochondrial biogeneses	6.77857e-21	1.00207	1	1	4.80601e-18	seurat_exp_11
52; HIF-1-signaling-pathway	HIF_1_signaling_pathway	FLT1	Increase oxygen delivery; Angiogenesis	7.68933e-21	0.580399	1	1	5.45174e-18	seurat_exp_11
3; Apoptosis	Apoptosis	BCL2L1	Pro-survival genes	1.09958e-20	0.751252	1	1	7.79602e-18	seurat_exp_11
43; HIF-1-signaling-pathway	HIF_1_signaling_pathway	PFKL	Reduce oxygen consumption; Promote anaerobic metabolism	1.17329e-20	0.693865	1	1	8.31862e-18	seurat_exp_11
138; TNF-signaling-pathway	TNF_signaling_pathway	NFKB1	Degradation; Cell survival	2.06542e-20	0.684907	1	1	1.46438e-17	seurat_exp_11
29; Toll-like-receptor-signaling-pathway	Toll_like_receptor_signaling_pathway	CXCL8	Chemotactic effects ( Nutrophil, Immature DC )( NK cell )	3.72619e-20	0.500269	1	1	2.64187e-17	seurat_exp_11
46; Toll-like-receptor-signaling-pathway	Toll_like_receptor_signaling_pathway	TNF	Inflammatory cytokines;Proinflammatory effects	3.72619e-20	0.500269	1	1	2.64187e-17	seurat_exp_11
76; Toll-like-receptor-signaling-pathway	Toll_like_receptor_signaling_pathway	CCL3L3	Chemotactic effects ( Nutrophil, Immature DC )( NK cell )	3.72619e-20	0.500269	1	1	2.64187e-17	seurat_exp_11
41; Ras-signaling-pathway	Ras_signaling_pathway	RAC1		3.43164e-19	0.724823	1	1	2.43303e-16	seurat_exp_11
54; Chemokine-signaling-pathway	Chemokine_signaling_pathway	ROCK1		4.15408e-19	0.624243	1	1	2.94524e-16	seurat_exp_11
98; PI3K-Akt-signaling-pathway	PI3K_Akt_signaling_pathway	BCL2L1	Cell survival	9.66126e-19	0.665372	1	1	6.84983e-16	seurat_exp_11
6; B-cell-receptor-signaling-pathway	B_cell_receptor_signaling_pathway	NFKB1	DNA; B cell ontogeny; Autoimmunity; Anergy; Immuno response Ig production GC formation	1.04341e-18	0.781192	1	1	7.39775e-16	seurat_exp_11
51; MAPK-signaling-pathway	MAPK_signaling_pathway	ATF4	DNA; Proliferation differentiation, inflammation	3.49964e-18	0.510327	1	1	2.48124e-15	seurat_exp_11
15; p53-signaling-pathway	p53_signaling_pathway	TSC2	Inhibition of IGF-1/mTOR pathway	3.54181e-18	0.577045	1	1	2.51114e-15	seurat_exp_11
18; mTOR-signaling-pathway	mTOR_signaling_pathway	RHOA	Cytoskeletal organization	3.58188e-18	0.808756	1	1	2.53955e-15	seurat_exp_11
116; EGFR-tyrosine-kinase-inhibitor-resistance	EGFR_tyrosine_kinase_inhibitor_resistance	STAT3	Abnormal dimerization of STAT 3; DNA; Differentiation; Growth; Proliferation; Survival; Motility; Angiogenesis	8.87661e-18	0.574614	1	1	6.29351e-15	seurat_exp_11
11; Apoptosis	Apoptosis	DFFB	DNA fragmentation; Apoptosis	1.41129e-17	0.738437	1	1	1.00061e-14	seurat_exp_11
58; Hippo-signaling-pathway	Hippo_signaling_pathway	SMAD7	Anti-apoptotic genes; Pro-proliferation genes	1.49336e-17	0.531966	1	1	1.05879e-14	seurat_exp_11
168; C-type-lectin-receptor-signaling-pathway	C_type_lectin_receptor_signaling_pathway	IL12A	Th1 Th17 cell differentiation	2.58356e-17	0.855741	1	1	1.83174e-14	seurat_exp_11
102; C-type-lectin-receptor-signaling-pathway	C_type_lectin_receptor_signaling_pathway	IL10	Th1 Th17 cell differentiation	6.45292e-17	0.627667	1	1	4.57512e-14	seurat_exp_11
37; C-type-lectin-receptor-signaling-pathway	C_type_lectin_receptor_signaling_pathway	IL6	Th1 Th17 cell differentiation	8.09784e-17	0.624777	1	1	5.74137e-14	seurat_exp_11
108; NF-kappa-B-signaling-pathway	NF_kappa_B_signaling_pathway	IKBKG		9.32694e-17	1.34762	1	1	6.6128e-14	seurat_exp_11
38; C-type-lectin-receptor-signaling-pathway	C_type_lectin_receptor_signaling_pathway	IL12A	Th1 Th17 cell differentiation	1.3997e-16	0.654866	1	1	9.92387e-14	seurat_exp_11
85; Cell-cycle	Cell_cycle	RAD21		2.63269e-16	0.920608	1	1	1.86658e-13	seurat_exp_11
78; C-type-lectin-receptor-signaling-pathway	C_type_lectin_receptor_signaling_pathway	IL12A	Th1 Th17 cell differentiation	2.77426e-16	0.669661	1	1	1.96695e-13	seurat_exp_11
76; C-type-lectin-receptor-signaling-pathway	C_type_lectin_receptor_signaling_pathway	IL23A	Th1 Th17 cell differentiation	3.255e-16	0.6483	1	1	2.30779e-13	seurat_exp_11
77; C-type-lectin-receptor-signaling-pathway	C_type_lectin_receptor_signaling_pathway	IL6	Th1 Th17 cell differentiation	3.3826e-16	0.640676	1	1	2.39826e-13	seurat_exp_11
101; C-type-lectin-receptor-signaling-pathway	C_type_lectin_receptor_signaling_pathway	TNF	Th1 Th17 cell differentiation	4.44595e-16	0.634342	1	1	3.15218e-13	seurat_exp_11
62; C-type-lectin-receptor-signaling-pathway	C_type_lectin_receptor_signaling_pathway	IL23A	Th1 Th17 cell differentiation	5.10698e-16	0.637707	1	1	3.62085e-13	seurat_exp_11
63; C-type-lectin-receptor-signaling-pathway	C_type_lectin_receptor_signaling_pathway	IL6	Th1 Th17 cell differentiation	5.3134e-16	0.631227	1	1	3.7672e-13	seurat_exp_11
79; C-type-lectin-receptor-signaling-pathway	C_type_lectin_receptor_signaling_pathway	IL1B	Th1 Th17 cell differentiation	6.94373e-16	0.63366	1	1	4.92311e-13	seurat_exp_11
103; Chemokine-signaling-pathway	Chemokine_signaling_pathway	PAK1		1.07344e-15	0.5626	1	1	7.61067e-13	seurat_exp_11
64; C-type-lectin-receptor-signaling-pathway	C_type_lectin_receptor_signaling_pathway	IL1B	Th1 Th17 cell differentiation	1.07448e-15	0.62466	1	1	7.6181e-13	seurat_exp_11
88; C-type-lectin-receptor-signaling-pathway	C_type_lectin_receptor_signaling_pathway	IL23A	Th1 Th17 cell differentiation	1.09941e-14	0.647898	1	1	7.79483e-12	seurat_exp_11
156; C-type-lectin-receptor-signaling-pathway	C_type_lectin_receptor_signaling_pathway	IL10	Th1 Th17 cell differentiation	1.10487e-14	0.644216	1	1	7.83353e-12	seurat_exp_11
173; C-type-lectin-receptor-signaling-pathway	C_type_lectin_receptor_signaling_pathway	C00584	Th1 Th17 cell differentiation	1.10487e-14	0.644216	1	1	7.83353e-12	seurat_exp_11
129; C-type-lectin-receptor-signaling-pathway	C_type_lectin_receptor_signaling_pathway	IL12A	Th1 Th17 cell differentiation	1.29384e-14	0.670923	1	1	9.17331e-12	seurat_exp_11
149; C-type-lectin-receptor-signaling-pathway	C_type_lectin_receptor_signaling_pathway	IL6	Th1 Th17 cell differentiation	1.31904e-14	0.640366	1	1	9.35197e-12	seurat_exp_11
96; NF-kappa-B-signaling-pathway	NF_kappa_B_signaling_pathway	BCL2A1	Survival	3.889e-14	0.508852	1	1	2.7573e-11	seurat_exp_11
11; HIF-1-signaling-pathway	HIF_1_signaling_pathway	SLC2A1	Reduce oxygen consumption; Promote anaerobic metabolism	4.5785e-14	0.513646	1	1	3.24615e-11	seurat_exp_11
57; MAPK-signaling-pathway	MAPK_signaling_pathway	ELK1	p53 signaling pathway; Proliferation differentiation, inflammation	1.14821e-13	0.582425	1	1	8.14078e-11	seurat_exp_11
33; C-type-lectin-receptor-signaling-pathway	C_type_lectin_receptor_signaling_pathway	IL1B	Th1 Th17 cell differentiation	3.23079e-13	0.501363	1	1	2.29063e-10	seurat_exp_11
20; mTOR-signaling-pathway	mTOR_signaling_pathway	SGK1	Cell survival	5.2183e-13	0.577146	1	1	3.69978e-10	seurat_exp_11
144; EGFR-tyrosine-kinase-inhibitor-resistance	EGFR_tyrosine_kinase_inhibitor_resistance	BCL2L11	Differentiation; Growth; Proliferation; Survival; Motility; Angiogenesis	1.47033e-12	0.529287	1	1	1.04246e-09	seurat_exp_11
50; C-type-lectin-receptor-signaling-pathway	C_type_lectin_receptor_signaling_pathway	IL17D	Tfh cell differentiation	1.60082e-12	0.602531	1	1	1.13498e-09	seurat_exp_11
28; C-type-lectin-receptor-signaling-pathway	C_type_lectin_receptor_signaling_pathway	IL12A	Th1 Th17 cell differentiation	4.02853e-12	0.640894	1	1	2.85623e-09	seurat_exp_11
148; C-type-lectin-receptor-signaling-pathway	C_type_lectin_receptor_signaling_pathway	IL1B	Th1 Th17 cell differentiation	1.10856e-11	0.637422	1	1	7.85969e-09	seurat_exp_11
95; NF-kappa-B-signaling-pathway	NF_kappa_B_signaling_pathway	BCL2L1	Survival	1.44117e-11	0.579697	1	1	1.02179e-08	seurat_exp_11
40; TNF-signaling-pathway	TNF_signaling_pathway	JUN		1.63553e-11	0.719233	1	1	1.15959e-08	seurat_exp_11
137; NF-kappa-B-signaling-pathway	NF_kappa_B_signaling_pathway	ICAM1	Lymphocyte adhesion, T-cell costimulation	4.78228e-11	1.29658	1	1	3.39063e-08	seurat_exp_11
135; NF-kappa-B-signaling-pathway	NF_kappa_B_signaling_pathway	CCL19	Lymphoid-tissue homing	8.94367e-11	1.27757	1	1	6.34106e-08	seurat_exp_11
54; NF-kappa-B-signaling-pathway	NF_kappa_B_signaling_pathway	CCL13	Lymphoid-tissue homing	1.29961e-10	1.31729	1	1	9.21422e-08	seurat_exp_11
136; NF-kappa-B-signaling-pathway	NF_kappa_B_signaling_pathway	TNFSF13B	B-cell development; B-cell survival	1.33134e-10	1.32884	1	1	9.43917e-08	seurat_exp_11
134; NF-kappa-B-signaling-pathway	NF_kappa_B_signaling_pathway	CCL21	Lymphoid-tissue homing	1.3428e-10	1.31245	1	1	9.52048e-08	seurat_exp_11
42; MAPK-signaling-pathway	MAPK_signaling_pathway	Wnt signaling pathway		2.06938e-08	0.552582	1	1	1.46719e-05	seurat_exp_11
55; NF-kappa-B-signaling-pathway	NF_kappa_B_signaling_pathway	CXCL12	Myeloiesis and B-cell lymphopoieses	3.58872e-06	1.09729	1	1	0.0025444	seurat_exp_11
50; HIF-1-signaling-pathway	HIF_1_signaling_pathway	TF	Increase oxygen delivery; Iron metabolism	5.47107e-14	0.946842	1	1	3.87899e-11	seurat_exp_12
43; Ras-signaling-pathway	Ras_signaling_pathway	ELK1	Gene expression	1.02442e-12	-0.953266	1	1	7.26317e-10	seurat_exp_12
61; Ras-signaling-pathway	Ras_signaling_pathway	RAP1A		1.81107e-12	0.868224	1	1	1.28405e-09	seurat_exp_12
44; Ras-signaling-pathway	Ras_signaling_pathway	ETS1	Gene expression	4.30315e-11	-0.811147	1	1	3.05093e-08	seurat_exp_12
164; cGMP-PKG-signaling-pathway	cGMP_PKG_signaling_pathway	PPIF	Cardioprotection	6.66899e-11	0.742716	1	1	4.72832e-08	seurat_exp_12
27; Ras-signaling-pathway	Ras_signaling_pathway	ABL1	Cytoskeletal remodelling	3.0875e-10	-0.547286	1	1	2.18904e-07	seurat_exp_12
13; MAPK-signaling-pathway	MAPK_signaling_pathway	STMN1		7.02667e-10	-0.583269	1	1	4.98191e-07	seurat_exp_12
5; cAMP-signaling-pathway	cAMP_signaling_pathway	C00076		3.67233e-09	1.18076	1	1	2.60368e-06	seurat_exp_12
42; Ras-signaling-pathway	Ras_signaling_pathway	PLA2G4B	Gene expression	6.87484e-09	-0.698578	1	1	4.87426e-06	seurat_exp_12
126; Endocrine-resistance	Endocrine_resistance	FOS	DNA; Transcription Proliferation	1.44344e-08	-0.963965	1	1	1.0234e-05	seurat_exp_12
9; Insulin-signaling-pathway	Insulin_signaling_pathway	ELK1	DNA; Proliferation differentiation	1.47268e-08	-1.10616	1	1	1.04413e-05	seurat_exp_12
135; NF-kappa-B-signaling-pathway	NF_kappa_B_signaling_pathway	CCL19	Lymphoid-tissue homing	1.94091e-08	-1.06129	1	1	1.37611e-05	seurat_exp_12
137; NF-kappa-B-signaling-pathway	NF_kappa_B_signaling_pathway	ICAM1	Lymphocyte adhesion, T-cell costimulation	2.70719e-08	-0.997333	1	1	1.91939e-05	seurat_exp_12
134; NF-kappa-B-signaling-pathway	NF_kappa_B_signaling_pathway	CCL21	Lymphoid-tissue homing	3.00755e-08	-1.05525	1	1	2.13236e-05	seurat_exp_12
54; NF-kappa-B-signaling-pathway	NF_kappa_B_signaling_pathway	CCL13	Lymphoid-tissue homing	3.13286e-08	-1.05252	1	1	2.2212e-05	seurat_exp_12
6; Fc-epsilon-RI-signaling-pathway	Fc_epsilon_RI_signaling_pathway	C00696	Generation of eicosanoids	3.77438e-08	-1.10121	1	1	2.67603e-05	seurat_exp_12
7; Fc-epsilon-RI-signaling-pathway	Fc_epsilon_RI_signaling_pathway	C05952	Generation of eicosanoids	3.77438e-08	-1.10121	1	1	2.67603e-05	seurat_exp_12
8; Fc-epsilon-RI-signaling-pathway	Fc_epsilon_RI_signaling_pathway	C05951	Generation of eicosanoids	3.77438e-08	-1.10121	1	1	2.67603e-05	seurat_exp_12
9; Fc-epsilon-RI-signaling-pathway	Fc_epsilon_RI_signaling_pathway	C02166	Generation of eicosanoids	3.77438e-08	-1.10121	1	1	2.67603e-05	seurat_exp_12
136; NF-kappa-B-signaling-pathway	NF_kappa_B_signaling_pathway	TNFSF13B	B-cell development; B-cell survival	4.77558e-08	-1.06163	1	1	3.38589e-05	seurat_exp_12
109; Chemokine-signaling-pathway	Chemokine_signaling_pathway	MAPK1	DNA; Cytokine production; Cellular gowth and differentiation; Cell survival; Migration; Apoptosis	7.50112e-08	-0.896893	1	1	5.31829e-05	seurat_exp_12
19; mTOR-signaling-pathway	mTOR_signaling_pathway	PRKCA	Cytoskeletal organization	1.08554e-07	-0.727855	1	1	7.69646e-05	seurat_exp_12
94; cGMP-PKG-signaling-pathway	cGMP_PKG_signaling_pathway	MAPK1	Platelet activation	1.9913e-07	-0.723756	1	1	0.000141183	seurat_exp_12
58; AMPK-signaling-pathway	AMPK_signaling_pathway	SCD	Repressed fatty acid syntheses	2.54116e-07	0.514176	1	1	0.000180168	seurat_exp_12
96; Hippo-signaling-pathway	Hippo_signaling_pathway	FGF1	Anti-apoptotic genes; Pro-proliferation genes	4.02278e-07	0.781471	1	1	0.000285215	seurat_exp_12
3; ErbB-signaling-pathway	ErbB_signaling_pathway	ELK1	DNA; Migration/ Invasion	7.39189e-07	-1.00993	1	1	0.000524085	seurat_exp_12
52; MAPK-signaling-pathway	MAPK_signaling_pathway	MEF2C	DNA; Proliferation differentiation, inflammation	7.99855e-07	-0.616326	1	1	0.000567097	seurat_exp_12
6; B-cell-receptor-signaling-pathway	B_cell_receptor_signaling_pathway	NFKB1	DNA; B cell ontogeny; Autoimmunity; Anergy; Immuno response Ig production GC formation	1.32547e-06	-0.567405	1	1	0.00093976	seurat_exp_12
142; NF-kappa-B-signaling-pathway	NF_kappa_B_signaling_pathway	NFKB2	Activation of noncanonical pathway	2.11142e-06	-0.777159	1	1	0.001497	seurat_exp_12
36; TNF-signaling-pathway	TNF_signaling_pathway	CREB3		3.07413e-06	-0.837657	1	1	0.00217956	seurat_exp_12
55; NF-kappa-B-signaling-pathway	NF_kappa_B_signaling_pathway	CXCL12	Myeloiesis and B-cell lymphopoieses	4.45981e-06	-0.917267	1	1	0.00316201	seurat_exp_12
113; NF-kappa-B-signaling-pathway	NF_kappa_B_signaling_pathway	CFLAR	Survival	6.03269e-06	-0.707191	1	1	0.00427718	seurat_exp_12
60; Hippo-signaling-pathway	Hippo_signaling_pathway	CTGF	Anti-apoptotic genes; Pro-proliferation genes	7.70353e-06	-0.661342	1	1	0.0054618	seurat_exp_12
4; NF-kappa-B-signaling-pathway	NF_kappa_B_signaling_pathway	BIRC2	Survival	9.51294e-06	-0.534827	1	1	0.00674467	seurat_exp_12
40; ErbB-signaling-pathway	ErbB_signaling_pathway	ELK1	DNA; Angiogenesis	1.02e-05	-0.565217	1	1	0.00723178	seurat_exp_12
21; Toll-like-receptor-signaling-pathway	Toll_like_receptor_signaling_pathway	IFNA1	Antiviral effects	1.57324e-05	0.679468	1	1	0.0111542	seurat_exp_12
73; PI3K-Akt-signaling-pathway	PI3K_Akt_signaling_pathway	MAPK1	Cell proliferation Angiogenesis DNA repair	2.13985e-05	-0.63395	1	1	0.0151715	seurat_exp_12
125; Endocrine-resistance	Endocrine_resistance	JUN	DNA; Transcription Proliferation	2.37336e-05	-1.15911	1	1	0.0168271	seurat_exp_12
129; NF-kappa-B-signaling-pathway	NF_kappa_B_signaling_pathway	PTGS2	Inflammation	2.86113e-05	-0.56048	1	1	0.0202854	seurat_exp_12
116; NF-kappa-B-signaling-pathway	NF_kappa_B_signaling_pathway	GADD45B	Survival	3.37705e-05	-0.672179	1	1	0.0239433	seurat_exp_12
3; Rap1-signaling-pathway	Rap1_signaling_pathway	MAPK1	Proliferation survival gene activation	6.92754e-05	-0.642973	1	1	0.0491162	seurat_exp_12
65; ErbB-signaling-pathway	ErbB_signaling_pathway	MYC	DNA; Adhesion	6.93343e-05	-0.770274	1	1	0.049158	seurat_exp_12
65; Complement-and-coagulation-cascades	Complement_and_coagulation_cascades	C5AR1	Degranulation, chemotaxis	5.79712e-19	0.980012	1	1	4.11016e-16	seurat_exp_13
33; cAMP-signaling-pathway	cAMP_signaling_pathway	C01330		1.67602e-17	-0.583263	1	1	1.1883e-14	seurat_exp_13
58; Complement-and-coagulation-cascades	Complement_and_coagulation_cascades	F2RL2	Anti-inflammatory responess, vasodilation,increased endothelial permeability, release of Weibel-Palade bodies	1.28232e-14	1.0482	1	1	9.09167e-12	seurat_exp_13
22; Toll-like-receptor-signaling-pathway	Toll_like_receptor_signaling_pathway	CD86	Costimulatory molecules; T cell stimulation	5.68718e-14	1.60206	1	1	4.03221e-11	seurat_exp_13
7; Complement-and-coagulation-cascades	Complement_and_coagulation_cascades	C00290		9.21624e-14	1.02443	1	1	6.53431e-11	seurat_exp_13
66; Toll-like-receptor-signaling-pathway	Toll_like_receptor_signaling_pathway	CASP8		1.27395e-13	1.75402	1	1	9.03231e-11	seurat_exp_13
48; Toll-like-receptor-signaling-pathway	Toll_like_receptor_signaling_pathway	CD80	Costimulatory molecules; T cell stimulation	2.07177e-13	1.53729	1	1	1.46888e-10	seurat_exp_13
23; Toll-like-receptor-signaling-pathway	Toll_like_receptor_signaling_pathway	CD40	Costimulatory molecules; T cell stimulation	2.53321e-13	1.52251	1	1	1.79604e-10	seurat_exp_13
11; cAMP-signaling-pathway	cAMP_signaling_pathway	C01330		2.72913e-13	0.815071	1	1	1.93495e-10	seurat_exp_13
36; cAMP-signaling-pathway	cAMP_signaling_pathway	C00238		2.72913e-13	0.815071	1	1	1.93495e-10	seurat_exp_13
118; cAMP-signaling-pathway	cAMP_signaling_pathway	MYL9	Relaxation (endothelial cell, smooth muscle cell)	3.92219e-13	1.41452	1	1	2.78083e-10	seurat_exp_13
77; Hippo-signaling-pathway	Hippo_signaling_pathway	CCND1	Anti-apoptotic genes; Pro-proliferation genes	6.25008e-13	1.8093	1	1	4.43131e-10	seurat_exp_13
16; cGMP-PKG-signaling-pathway	cGMP_PKG_signaling_pathway	MYL9	Smooth muscle relaxation	8.37233e-13	1.05576	1	1	5.93598e-10	seurat_exp_13
28; JAK-STAT-signaling-pathway	JAK_STAT_signaling_pathway	CCND1	Cell-cycle progression	4.57937e-12	0.827567	1	1	3.24677e-09	seurat_exp_13
20; Toll-like-receptor-signaling-pathway	Toll_like_receptor_signaling_pathway	IFNB1	Antiviral effects	5.45067e-12	1.33323	1	1	3.86453e-09	seurat_exp_13
33; Wnt-signaling-pathway	Wnt_signaling_pathway	CCND1		5.77848e-12	0.858689	1	1	4.09694e-09	seurat_exp_13
29; Toll-like-receptor-signaling-pathway	Toll_like_receptor_signaling_pathway	CXCL8	Chemotactic effects ( Nutrophil, Immature DC )( NK cell )	1.70937e-11	1.09062	1	1	1.21195e-08	seurat_exp_13
46; Toll-like-receptor-signaling-pathway	Toll_like_receptor_signaling_pathway	TNF	Inflammatory cytokines;Proinflammatory effects	1.70937e-11	1.09062	1	1	1.21195e-08	seurat_exp_13
76; Toll-like-receptor-signaling-pathway	Toll_like_receptor_signaling_pathway	CCL3L3	Chemotactic effects ( Nutrophil, Immature DC )( NK cell )	1.70937e-11	1.09062	1	1	1.21195e-08	seurat_exp_13
87; Toll-like-receptor-signaling-pathway	Toll_like_receptor_signaling_pathway	CCL4L1	Chemotactic effects ( Nutrophil, Immature DC )( NK cell )	1.90478e-11	1.11545	1	1	1.35049e-08	seurat_exp_13
39; Toll-like-receptor-signaling-pathway	Toll_like_receptor_signaling_pathway	IL6	Inflammatory cytokines;Proinflammatory effects	1.93183e-11	1.08746	1	1	1.36967e-08	seurat_exp_13
97; Ras-signaling-pathway	Ras_signaling_pathway	PAK4...	Cytoskeleton organization; Cell motolity	1.9654e-11	-0.649139	1	1	1.39347e-08	seurat_exp_13
58; PPAR-signaling-pathway	PPAR_signaling_pathway	PLTP	Ketogenesis; Lipid metabolism	2.07606e-11	0.957362	1	1	1.47192e-08	seurat_exp_13
34; Toll-like-receptor-signaling-pathway	Toll_like_receptor_signaling_pathway	IL1B	Inflammatory cytokines;Proinflammatory effects	3.1709e-11	1.07413	1	1	2.24817e-08	seurat_exp_13
25; p53-signaling-pathway	p53_signaling_pathway	CD82	Inflammhibition of angiogenesis and metastasis	4.35045e-11	1.06525	1	1	3.08447e-08	seurat_exp_13
40; FoxO-signaling-pathway	FoxO_signaling_pathway	CCND1	Cell cycle regulation	5.09119e-11	0.6358	1	1	3.60965e-08	seurat_exp_13
19; Toll-like-receptor-signaling-pathway	Toll_like_receptor_signaling_pathway	CXCL10	Chemptactic effects ( T cell )	1.17162e-10	1.30122	1	1	8.30675e-08	seurat_exp_13
62; Ras-signaling-pathway	Ras_signaling_pathway	RASSF5	Effectors	1.24029e-10	-0.535387	1	1	8.79366e-08	seurat_exp_13
40; Toll-like-receptor-signaling-pathway	Toll_like_receptor_signaling_pathway	CCL5	Chemotactic effects ( Nutrophil, Immature DC )( NK cell )	1.33912e-10	1.00852	1	1	9.49434e-08	seurat_exp_13
63; Ras-signaling-pathway	Ras_signaling_pathway	TIAM1	Effectors	1.34113e-10	-0.575244	1	1	9.5086e-08	seurat_exp_13
94; Hippo-signaling-pathway	Hippo_signaling_pathway	GLI2	Anti-apoptotic genes; Pro-proliferation genes	2.23149e-10	1.5733	1	1	1.58213e-07	seurat_exp_13
18; Toll-like-receptor-signaling-pathway	Toll_like_receptor_signaling_pathway	CXCL11	Chemptactic effects ( T cell )	2.33224e-10	1.29838	1	1	1.65356e-07	seurat_exp_13
77; Toll-like-receptor-signaling-pathway	Toll_like_receptor_signaling_pathway	CXCL9	Chemptactic effects ( T cell )	2.33224e-10	1.29838	1	1	1.65356e-07	seurat_exp_13
86; Toll-like-receptor-signaling-pathway	Toll_like_receptor_signaling_pathway	IL12A	Inflammatory cytokines;Proinflammatory effects	2.75776e-10	1.1035	1	1	1.95525e-07	seurat_exp_13
21; Toll-like-receptor-signaling-pathway	Toll_like_receptor_signaling_pathway	IFNA1	Antiviral effects	3.77008e-10	1.1365	1	1	2.67298e-07	seurat_exp_13
12; Hippo-signaling-pathway	Hippo_signaling_pathway	CTGF	Anti-apoptotic genes; Pro-proliferation genes	4.42559e-10	1.53749	1	1	3.13774e-07	seurat_exp_13
11; Complement-and-coagulation-cascades	Complement_and_coagulation_cascades	F2R	Anti-inflammatory responess, vasodilation,increased endothelial permeability, release of Weibel-Palade bodies	5.61247e-10	0.838975	1	1	3.97924e-07	seurat_exp_13
112; cAMP-signaling-pathway	cAMP_signaling_pathway	GLI1	Downregulation of Hedgehog signaling (embryonic fibroblast)	7.53854e-10	0.671806	1	1	5.34483e-07	seurat_exp_13
103; Chemokine-signaling-pathway	Chemokine_signaling_pathway	PAK1		8.42251e-10	-0.658771	1	1	5.97156e-07	seurat_exp_13
76; Ras-signaling-pathway	Ras_signaling_pathway	RALBP1	Effectors	8.51714e-10	-0.582351	1	1	6.03865e-07	seurat_exp_13
37; Ras-signaling-pathway	Ras_signaling_pathway	FASLG	Cell survival; Cell growth; Cell migration; Cell cycle progression; Transcription	1.87995e-09	0.683395	1	1	1.33288e-06	seurat_exp_13
123; cAMP-signaling-pathway	cAMP_signaling_pathway	PAK1	Cytoskeletal remodelling, acherens junction enhancerment (vascular endothelial cell)	3.05622e-09	-0.561809	1	1	2.16686e-06	seurat_exp_13
3; ErbB-signaling-pathway	ErbB_signaling_pathway	ELK1	DNA; Migration/ Invasion	3.12067e-09	-1.37545	1	1	2.21255e-06	seurat_exp_13
13; MAPK-signaling-pathway	MAPK_signaling_pathway	STMN1		8.95761e-09	-0.613902	1	1	6.35095e-06	seurat_exp_13
36; JAK-STAT-signaling-pathway	JAK_STAT_signaling_pathway	GFAP	Differentation	1.45504e-08	1.15887	1	1	1.03162e-05	seurat_exp_13
34; TGF-beta-signaling-pathway	TGF_beta_signaling_pathway	ROCK1		1.94627e-08	0.832047	1	1	1.37991e-05	seurat_exp_13
90; Hippo-signaling-pathway	Hippo_signaling_pathway	BBC3	Proapoptotic genes	2.08338e-08	0.972335	1	1	1.47712e-05	seurat_exp_13
132; NF-kappa-B-signaling-pathway	NF_kappa_B_signaling_pathway	VCAM1	Inflammation	2.36417e-08	3.12453	1	1	1.6762e-05	seurat_exp_13
51; Hedgehog-signaling-pathway	Hedgehog_signaling_pathway	CCND1	Activiation of Hh target genes; Cell prolifeation tissue patterning stem cell maintenance,	2.67104e-08	0.773921	1	1	1.89377e-05	seurat_exp_13
47; Fc-epsilon-RI-signaling-pathway	Fc_epsilon_RI_signaling_pathway	MAPK8	DNA; Cytokine gene transcription	2.83678e-08	-0.585363	1	1	2.01128e-05	seurat_exp_13
78; Hippo-signaling-pathway	Hippo_signaling_pathway	SOX2	Anti-apoptotic genes; Pro-proliferation genes	3.1573e-08	1.27084	1	1	2.23853e-05	seurat_exp_13
50; HIF-1-signaling-pathway	HIF_1_signaling_pathway	TF	Increase oxygen delivery; Iron metabolism	3.49463e-08	0.634543	1	1	2.47769e-05	seurat_exp_13
114; cAMP-signaling-pathway	cAMP_signaling_pathway	HHIP	Downregulation of Hedgehog signaling (embryonic fibroblast)	3.60996e-08	0.708173	1	1	2.55946e-05	seurat_exp_13
38; Ras-signaling-pathway	Ras_signaling_pathway	MAPK8	Gene expression	3.72898e-08	-0.689319	1	1	2.64385e-05	seurat_exp_13
88; Hippo-signaling-pathway	Hippo_signaling_pathway	ID1	Anti-apoptotic genes; Pro-proliferation genes	4.69953e-08	0.94707	1	1	3.33197e-05	seurat_exp_13
62; cAMP-signaling-pathway	cAMP_signaling_pathway	BAD	Cell survival	5.22206e-08	0.843162	1	1	3.70244e-05	seurat_exp_13
65; ErbB-signaling-pathway	ErbB_signaling_pathway	MYC	DNA; Adhesion	5.25568e-08	-1.31383	1	1	3.72628e-05	seurat_exp_13
38; Fc-gamma-R-mediated-phagocytosis	Fc_gamma_R_mediated_phagocytosis	CFL1	Phagocytosis; Membrane traficking; Particle internalization; Phagosome closure; Phagosome-lysosome fusion	8.46336e-08	1.00902	1	1	6.00052e-05	seurat_exp_13
61; AMPK-signaling-pathway	AMPK_signaling_pathway	RPS6KB1	Inhibited cell growth & protein synthesis	8.79036e-08	-0.615484	1	1	6.23236e-05	seurat_exp_13
52; MAPK-signaling-pathway	MAPK_signaling_pathway	MEF2C	DNA; Proliferation differentiation, inflammation	9.54136e-08	-0.681777	1	1	6.76482e-05	seurat_exp_13
80; Hippo-signaling-pathway	Hippo_signaling_pathway	BIRC2	Anti-apoptotic genes; Pro-proliferation genes	9.85884e-08	0.932941	1	1	6.98992e-05	seurat_exp_13
12; Toll-like-receptor-signaling-pathway	Toll_like_receptor_signaling_pathway	NFKB1	Degradation	1.04719e-07	2.1594	1	1	7.42459e-05	seurat_exp_13
74; PPAR-signaling-pathway	PPAR_signaling_pathway	DBI	Fatty acid transport; Lipid metabolism	1.07248e-07	0.515718	1	1	7.60388e-05	seurat_exp_13
40; ErbB-signaling-pathway	ErbB_signaling_pathway	ELK1	DNA; Angiogenesis	1.40823e-07	-0.674129	1	1	9.98434e-05	seurat_exp_13
42; Calcium-signaling-pathway	Calcium_signaling_pathway	MYLK4	Contraction	1.46719e-07	0.529069	1	1	0.000104024	seurat_exp_13
109; Chemokine-signaling-pathway	Chemokine_signaling_pathway	MAPK1	DNA; Cytokine production; Cellular gowth and differentiation; Cell survival; Migration; Apoptosis	1.77543e-07	-0.918707	1	1	0.000125878	seurat_exp_13
123; Endocrine-resistance	Endocrine_resistance	CARM1	DNA; CoA overexpression AP1/SP1 overexpression; Transcription Proliferation	1.98119e-07	-0.544075	1	1	0.000140467	seurat_exp_13
62; AMPK-signaling-pathway	AMPK_signaling_pathway	EIF4EBP1	Inhibited cell growth & protein synthesis	2.03801e-07	0.577216	1	1	0.000144495	seurat_exp_13
113; NF-kappa-B-signaling-pathway	NF_kappa_B_signaling_pathway	CFLAR	Survival	2.29261e-07	1.99876	1	1	0.000162546	seurat_exp_13
44; Ras-signaling-pathway	Ras_signaling_pathway	ETS1	Gene expression	2.75302e-07	-0.702279	1	1	0.000195189	seurat_exp_13
79; Hippo-signaling-pathway	Hippo_signaling_pathway	SNAI2	Anti-apoptotic genes; Pro-proliferation genes	2.76308e-07	0.811684	1	1	0.000195902	seurat_exp_13
108; NOD-like-receptor-signaling-pathway	NOD_like_receptor_signaling_pathway	GABARAP		3.14614e-07	-0.541666	1	1	0.000223062	seurat_exp_13
67; Ras-signaling-pathway	Ras_signaling_pathway	RAPGEF5	Effectors	3.32376e-07	-0.554055	1	1	0.000235654	seurat_exp_13
43; Ras-signaling-pathway	Ras_signaling_pathway	ELK1	Gene expression	3.86694e-07	-0.84616	1	1	0.000274166	seurat_exp_13
22; ErbB-signaling-pathway	ErbB_signaling_pathway	EIF4EBP1	Protein synthesis	3.88557e-07	0.564842	1	1	0.000275487	seurat_exp_13
23; ErbB-signaling-pathway	ErbB_signaling_pathway	RPS6KB1	Protein synthesis	4.98361e-07	-0.838279	1	1	0.000353338	seurat_exp_13
63; AMPK-signaling-pathway	AMPK_signaling_pathway	PPARG	Inhibited cell growth & protein synthesis	7.22634e-07	-0.540803	1	1	0.000512347	seurat_exp_13
45; Calcium-signaling-pathway	Calcium_signaling_pathway	PHKA1	Contraction;Metabolism	7.47675e-07	0.551132	1	1	0.000530102	seurat_exp_13
129; NF-kappa-B-signaling-pathway	NF_kappa_B_signaling_pathway	PTGS2	Inflammation	8.12563e-07	1.7845	1	1	0.000576107	seurat_exp_13
145; Endocrine-resistance	Endocrine_resistance	FOS	DNA; CoA overexpression AP1/SP1 overexpression; Transcription Proliferation	9.91871e-07	-0.556625	1	1	0.000703236	seurat_exp_13
9; Insulin-signaling-pathway	Insulin_signaling_pathway	ELK1	DNA; Proliferation differentiation	1.30742e-06	-1.07287	1	1	0.000926962	seurat_exp_13
27; Ras-signaling-pathway	Ras_signaling_pathway	ABL1	Cytoskeletal remodelling	1.37677e-06	-0.567854	1	1	0.000976132	seurat_exp_13
13; Hippo-signaling-pathway	Hippo_signaling_pathway	BIRC5	Anti-apoptotic genes; Pro-proliferation genes	1.5385e-06	0.769177	1	1	0.00109079	seurat_exp_13
74; Hippo-signaling-pathway	Hippo_signaling_pathway	AXIN1	Anti-apoptotic genes; Pro-proliferation genes	1.58848e-06	0.870922	1	1	0.00112623	seurat_exp_13
4; NF-kappa-B-signaling-pathway	NF_kappa_B_signaling_pathway	BIRC2	Survival	2.1945e-06	1.8806	1	1	0.0015559	seurat_exp_13
31; ErbB-signaling-pathway	ErbB_signaling_pathway	BAD	Cell survival	2.37964e-06	0.653452	1	1	0.00168717	seurat_exp_13
53; p53-signaling-pathway	p53_signaling_pathway	CCND1	G1 arrest( sustaines); Cell cycle arrest	2.70216e-06	0.735856	1	1	0.00191583	seurat_exp_13
3; NF-kappa-B-signaling-pathway	NF_kappa_B_signaling_pathway	BCL2	Survival	3.0565e-06	2.03471	1	1	0.00216706	seurat_exp_13
75; Hippo-signaling-pathway	Hippo_signaling_pathway	NKD1	Anti-apoptotic genes; Pro-proliferation genes	3.21316e-06	0.768013	1	1	0.00227813	seurat_exp_13
52; Hippo-signaling-pathway	Hippo_signaling_pathway	ITGB2	Anti-apoptotic genes; Pro-proliferation genes	3.96804e-06	0.678888	1	1	0.00281334	seurat_exp_13
131; NF-kappa-B-signaling-pathway	NF_kappa_B_signaling_pathway	CCL4L1	Inflammation	3.99431e-06	1.88518	1	1	0.00283197	seurat_exp_13
2; NF-kappa-B-signaling-pathway	NF_kappa_B_signaling_pathway	BCL2L1	Survival	4.32761e-06	2.01191	1	1	0.00306827	seurat_exp_13
54; RIG-I-like-receptor-signaling-pathway	RIG_I_like_receptor_signaling_pathway	CXCL10	Inflammatory cytokines; Protein synthesis; Growth arrest; Dendrition cell activation; NK cell activation; Antibody production; Apoptosis	4.74667e-06	0.956258	1	1	0.00336539	seurat_exp_13
32; Insulin-signaling-pathway	Insulin_signaling_pathway	EIF4E	Protein synthesis	5.03185e-06	-0.850114	1	1	0.00356758	seurat_exp_13
51; RIG-I-like-receptor-signaling-pathway	RIG_I_like_receptor_signaling_pathway	CXCL8	Inflammatory cytokines; Protein synthesis; Growth arrest; Dendrition cell activation; NK cell activation; Antibody production; Apoptosis	5.21297e-06	0.942087	1	1	0.00369599	seurat_exp_13
52; RIG-I-like-receptor-signaling-pathway	RIG_I_like_receptor_signaling_pathway	TNF	Inflammatory cytokines; Protein synthesis; Growth arrest; Dendrition cell activation; NK cell activation; Antibody production; Apoptosis	5.21297e-06	0.942087	1	1	0.00369599	seurat_exp_13
25; ErbB-signaling-pathway	ErbB_signaling_pathway	CDKN1B	Cell cycle progression	5.53689e-06	0.506145	1	1	0.00392566	seurat_exp_13
53; NF-kappa-B-signaling-pathway	NF_kappa_B_signaling_pathway	CXCL8	Survival	5.64601e-06	1.88777	1	1	0.00400302	seurat_exp_13
115; NF-kappa-B-signaling-pathway	NF_kappa_B_signaling_pathway	XIAP	Survival	5.64601e-06	1.88777	1	1	0.00400302	seurat_exp_13
130; NF-kappa-B-signaling-pathway	NF_kappa_B_signaling_pathway	TNF	Positive feedback	5.64601e-06	1.88777	1	1	0.00400302	seurat_exp_13
133; NF-kappa-B-signaling-pathway	NF_kappa_B_signaling_pathway	CXCL2	Inflammation	5.64601e-06	1.88777	1	1	0.00400302	seurat_exp_13
52; NF-kappa-B-signaling-pathway	NF_kappa_B_signaling_pathway	TRAF1	Survival	6.5537e-06	2.05138	1	1	0.00464658	seurat_exp_13
95; Hippo-signaling-pathway	Hippo_signaling_pathway	AFP	Anti-apoptotic genes; Pro-proliferation genes	6.67474e-06	0.666043	1	1	0.00473239	seurat_exp_13
128; NF-kappa-B-signaling-pathway	NF_kappa_B_signaling_pathway	IL1B	Positive feedback	6.76873e-06	1.87093	1	1	0.00479903	seurat_exp_13
14; Hippo-signaling-pathway	Hippo_signaling_pathway	AREG	Anti-apoptotic genes; Pro-proliferation genes	6.90838e-06	0.660151	1	1	0.00489804	seurat_exp_13
114; NF-kappa-B-signaling-pathway	NF_kappa_B_signaling_pathway	BCL2A1	Survival	7.45503e-06	1.8826	1	1	0.00528562	seurat_exp_13
51; NF-kappa-B-signaling-pathway	NF_kappa_B_signaling_pathway	TNFAIP3	Negative feedback	9.09981e-06	1.76592	1	1	0.00645176	seurat_exp_13
33; Ras-signaling-pathway	Ras_signaling_pathway	BCL2L1	Cell survival; Cell growth; Cell migration; Cell cycle progression; Transcription	1.83042e-05	-0.550657	1	1	0.0129777	seurat_exp_13
50; NF-kappa-B-signaling-pathway	NF_kappa_B_signaling_pathway	NFKBIA	Negative feedback	1.87226e-05	1.92084	1	1	0.0132744	seurat_exp_13
19; mTOR-signaling-pathway	mTOR_signaling_pathway	PRKCA	Cytoskeletal organization	1.96674e-05	-0.69941	1	1	0.0139442	seurat_exp_13
53; RIG-I-like-receptor-signaling-pathway	RIG_I_like_receptor_signaling_pathway	IL12A	Inflammatory cytokines; Protein synthesis; Growth arrest; Dendrition cell activation; NK cell activation; Antibody production; Apoptosis	2.58473e-05	0.915422	1	1	0.0183258	seurat_exp_13
44; Fc-gamma-R-mediated-phagocytosis	Fc_gamma_R_mediated_phagocytosis	GSN	Phagocytosis; Membrane traficking; Particle internalization; Phagosome closure; Phagosome-lysosome fusion	2.70356e-05	0.551397	1	1	0.0191682	seurat_exp_13
59; Ras-signaling-pathway	Ras_signaling_pathway	STK4	Apoptosis; Cell-cycle arrest	2.89227e-05	-0.637875	1	1	0.0205062	seurat_exp_13
2; PI3K-Akt-signaling-pathway	PI3K_Akt_signaling_pathway	EIF4E	Protein synthesis	3.01386e-05	-0.746473	1	1	0.0213683	seurat_exp_13
6; Fc-epsilon-RI-signaling-pathway	Fc_epsilon_RI_signaling_pathway	C00696	Generation of eicosanoids	3.12149e-05	-0.928599	1	1	0.0221314	seurat_exp_13
7; Fc-epsilon-RI-signaling-pathway	Fc_epsilon_RI_signaling_pathway	C05952	Generation of eicosanoids	3.12149e-05	-0.928599	1	1	0.0221314	seurat_exp_13
8; Fc-epsilon-RI-signaling-pathway	Fc_epsilon_RI_signaling_pathway	C05951	Generation of eicosanoids	3.12149e-05	-0.928599	1	1	0.0221314	seurat_exp_13
9; Fc-epsilon-RI-signaling-pathway	Fc_epsilon_RI_signaling_pathway	C02166	Generation of eicosanoids	3.12149e-05	-0.928599	1	1	0.0221314	seurat_exp_13
48; Rap1-signaling-pathway	Rap1_signaling_pathway	PARD3	Cell adhesion,migration,polarity	3.22953e-05	-0.788795	1	1	0.0228974	seurat_exp_13
142; NF-kappa-B-signaling-pathway	NF_kappa_B_signaling_pathway	NFKB2	Activation of noncanonical pathway	3.72406e-05	1.38743	1	1	0.0264036	seurat_exp_13
71; Complement-and-coagulation-cascades	Complement_and_coagulation_cascades	CR1	Phagocytosis	4.22484e-05	0.531135	1	1	0.0299541	seurat_exp_13
164; cGMP-PKG-signaling-pathway	cGMP_PKG_signaling_pathway	PPIF	Cardioprotection	4.49309e-05	1.11047	1	1	0.031856	seurat_exp_13
81; mTOR-signaling-pathway	mTOR_signaling_pathway	CLIP1	Microtubule organization	6.74124e-05	-0.838501	1	1	0.0477954	seurat_exp_13
27; Calcium-signaling-pathway	Calcium_signaling_pathway	PRKCA	Other signaling pathways	1.79716e-14	0.87897	1	1	1.27419e-11	seurat_exp_14
28; Calcium-signaling-pathway	Calcium_signaling_pathway	PTK2B	Other signaling pathways	2.12754e-14	1.06978	1	1	1.50843e-11	seurat_exp_14
100; PI3K-Akt-signaling-pathway	PI3K_Akt_signaling_pathway	PRKCA	Cglucose uptake; Vesicle transpory	4.26702e-13	0.950776	1	1	3.02532e-10	seurat_exp_14
26; Calcium-signaling-pathway	Calcium_signaling_pathway	PPP3CA	Proliferation; Fertilization; Learning and memory	2.13901e-10	0.83363	1	1	1.51656e-07	seurat_exp_14
42; Calcium-signaling-pathway	Calcium_signaling_pathway	MYLK4	Contraction	4.52325e-10	0.551702	1	1	3.20699e-07	seurat_exp_14
41; Fc-gamma-R-mediated-phagocytosis	Fc_gamma_R_mediated_phagocytosis	MARCKS	Phagocytosis; Membrane remodeling; Focal exocytosis; Pseudopod extention; Particle internalization	4.61365e-10	-0.619307	1	1	3.27108e-07	seurat_exp_14
30; Fc-epsilon-RI-signaling-pathway	Fc_epsilon_RI_signaling_pathway	PRKCA	DNA; Cytokine gene transcription	7.04434e-10	0.729131	1	1	4.99444e-07	seurat_exp_14
26; Ras-signaling-pathway	Ras_signaling_pathway	PRKCA		8.87559e-10	0.855973	1	1	6.2928e-07	seurat_exp_14
25; Calcium-signaling-pathway	Calcium_signaling_pathway	CAMK4	Proliferation; Fertilization; Learning and memory	1.63401e-09	0.510423	1	1	1.15851e-06	seurat_exp_14
14; Wnt-signaling-pathway	Wnt_signaling_pathway	PRKCA	DNA	2.37446e-09	0.568496	1	1	1.68349e-06	seurat_exp_14
52; MAPK-signaling-pathway	MAPK_signaling_pathway	MEF2C	DNA; Proliferation differentiation, inflammation	3.68332e-09	-0.806449	1	1	2.61147e-06	seurat_exp_14
51; Fc-gamma-R-mediated-phagocytosis	Fc_gamma_R_mediated_phagocytosis	NCF1	NADPH oxidase; Digestion of bacterium; Respiratory burst in phagosome	7.24115e-09	0.671549	1	1	5.13398e-06	seurat_exp_14
13; MAPK-signaling-pathway	MAPK_signaling_pathway	STMN1		3.18631e-08	-0.646483	1	1	2.2591e-05	seurat_exp_14
74; PPAR-signaling-pathway	PPAR_signaling_pathway	DBI	Fatty acid transport; Lipid metabolism	3.20985e-08	-0.750836	1	1	2.27579e-05	seurat_exp_14
31; PPAR-signaling-pathway	PPAR_signaling_pathway	SCP2	Fatty acid oxidation; Lipit metabolism	5.92231e-08	-0.647389	1	1	4.19892e-05	seurat_exp_14
53; p53-signaling-pathway	p53_signaling_pathway	CCND1	G1 arrest( sustaines); Cell cycle arrest	7.3075e-08	0.650808	1	1	5.18102e-05	seurat_exp_14
49; Hedgehog-signaling-pathway	Hedgehog_signaling_pathway	CCND1	Respression of Hh target genes; Cell prolifeation tissue patterning stem cell maintenance, development, ect	9.97737e-08	0.782974	1	1	7.07396e-05	seurat_exp_14
164; cGMP-PKG-signaling-pathway	cGMP_PKG_signaling_pathway	PPIF	Cardioprotection	1.65482e-06	-1.08395	1	1	0.00117327	seurat_exp_14
19; mTOR-signaling-pathway	mTOR_signaling_pathway	PRKCA	Cytoskeletal organization	2.10554e-06	1.3493	1	1	0.00149283	seurat_exp_14
89; Hippo-signaling-pathway	Hippo_signaling_pathway	ID2	Anti-apoptotic genes; Pro-proliferation genes	2.10554e-06	-0.669499	1	1	0.00149283	seurat_exp_14
75; Hippo-signaling-pathway	Hippo_signaling_pathway	NKD1	Anti-apoptotic genes; Pro-proliferation genes	4.29429e-06	-0.816015	1	1	0.00304465	seurat_exp_14
79; Hippo-signaling-pathway	Hippo_signaling_pathway	SNAI2	Anti-apoptotic genes; Pro-proliferation genes	4.4678e-06	-0.745969	1	1	0.00316767	seurat_exp_14
155; Chemokine-signaling-pathway	Chemokine_signaling_pathway	PXN	Migration	4.6251e-06	1.93835	1	1	0.0032792	seurat_exp_14
61; Ras-signaling-pathway	Ras_signaling_pathway	RAP1A		4.91929e-06	0.688566	1	1	0.00348778	seurat_exp_14
17; Rap1-signaling-pathway	Rap1_signaling_pathway	ACTB	Cell adhesion,migration,polarity	4.94968e-06	1.19329	1	1	0.00350932	seurat_exp_14
58; Fc-gamma-R-mediated-phagocytosis	Fc_gamma_R_mediated_phagocytosis	C00219	Phagocytosis; Membrane remodeling; Focal exocytosis; Pseudopod extention; Particle internalization	6.39353e-06	0.635803	1	1	0.00453301	seurat_exp_14
80; Hippo-signaling-pathway	Hippo_signaling_pathway	BIRC2	Anti-apoptotic genes; Pro-proliferation genes	7.06355e-06	-0.811661	1	1	0.00500805	seurat_exp_14
58; PPAR-signaling-pathway	PPAR_signaling_pathway	PLTP	Ketogenesis; Lipid metabolism	7.11512e-06	-0.584242	1	1	0.00504462	seurat_exp_14
74; Hippo-signaling-pathway	Hippo_signaling_pathway	AXIN1	Anti-apoptotic genes; Pro-proliferation genes	7.69746e-06	-0.956101	1	1	0.0054575	seurat_exp_14
7; Calcium-signaling-pathway	Calcium_signaling_pathway	ADCY1	Other signaling pathways	9.69572e-06	0.624808	1	1	0.00687426	seurat_exp_14
67; PPAR-signaling-pathway	PPAR_signaling_pathway	FADS2	Lipogenesis;; Lipid metabolism	1.14014e-05	-0.536588	1	1	0.00808357	seurat_exp_14
30; Rap1-signaling-pathway	Rap1_signaling_pathway	ITGAL	Cell adhesion,migration,polarity	2.45307e-05	2.42735	1	1	0.0173923	seurat_exp_14
103; Chemokine-signaling-pathway	Chemokine_signaling_pathway	PAK1		2.48985e-05	-0.605277	1	1	0.017653	seurat_exp_14
78; Hippo-signaling-pathway	Hippo_signaling_pathway	SOX2	Anti-apoptotic genes; Pro-proliferation genes	2.5915e-05	-0.989517	1	1	0.0183737	seurat_exp_14
16; VEGF-signaling-pathway	VEGF_signaling_pathway	HSPB1	Action reorganization; Migration	4.43852e-05	-0.558348	1	1	0.0314691	seurat_exp_14
67; Ras-signaling-pathway	Ras_signaling_pathway	RAPGEF5	Effectors	4.46375e-05	0.902414	1	1	0.031648	seurat_exp_14
2; VEGF-signaling-pathway	VEGF_signaling_pathway	C00533	Migration	6.45718e-05	-0.544529	1	1	0.0457814	seurat_exp_14
74; PPAR-signaling-pathway	PPAR_signaling_pathway	DBI	Fatty acid transport; Lipid metabolism	2.94695e-71	-0.66935	1	1	2.08938e-68	seurat_psf_0
50; HIF-1-signaling-pathway	HIF_1_signaling_pathway	TF	Increase oxygen delivery; Iron metabolism	6.02197e-37	-0.56592	1	1	4.26958e-34	seurat_psf_0
17; Rap1-signaling-pathway	Rap1_signaling_pathway	ACTB	Cell adhesion,migration,polarity	9.01422e-37	-0.626219	1	1	6.39108e-34	seurat_psf_0
18; Rap1-signaling-pathway	Rap1_signaling_pathway	CDH1	Cell adhesion,migration,polarity	9.16865e-26	-0.582751	1	1	6.50057e-23	seurat_psf_0
125; Endocrine-resistance	Endocrine_resistance	JUN	DNA; Transcription Proliferation	3.42616e-23	-1.03537	1	1	2.42915e-20	seurat_psf_0
126; Endocrine-resistance	Endocrine_resistance	FOS	DNA; Transcription Proliferation	1.70828e-21	-0.749446	1	1	1.21117e-18	seurat_psf_0
73; PI3K-Akt-signaling-pathway	PI3K_Akt_signaling_pathway	MAPK1	Cell proliferation Angiogenesis DNA repair	1.16895e-19	-0.528816	1	1	8.28785e-17	seurat_psf_0
48; Rap1-signaling-pathway	Rap1_signaling_pathway	PARD3	Cell adhesion,migration,polarity	9.84567e-18	-0.720843	1	1	6.98058e-15	seurat_psf_0
3; Rap1-signaling-pathway	Rap1_signaling_pathway	MAPK1	Proliferation survival gene activation	2.05596e-17	-0.532203	1	1	1.45768e-14	seurat_psf_0
33; C-type-lectin-receptor-signaling-pathway	C_type_lectin_receptor_signaling_pathway	IL1B	Th1 Th17 cell differentiation	8.05708e-16	-0.653613	1	1	5.71247e-13	seurat_psf_0
6; Fc-epsilon-RI-signaling-pathway	Fc_epsilon_RI_signaling_pathway	C00696	Generation of eicosanoids	5.367e-14	-0.823374	1	1	3.8052e-11	seurat_psf_0
7; Fc-epsilon-RI-signaling-pathway	Fc_epsilon_RI_signaling_pathway	C05952	Generation of eicosanoids	5.367e-14	-0.823374	1	1	3.8052e-11	seurat_psf_0
8; Fc-epsilon-RI-signaling-pathway	Fc_epsilon_RI_signaling_pathway	C05951	Generation of eicosanoids	5.367e-14	-0.823374	1	1	3.8052e-11	seurat_psf_0
9; Fc-epsilon-RI-signaling-pathway	Fc_epsilon_RI_signaling_pathway	C02166	Generation of eicosanoids	5.367e-14	-0.823374	1	1	3.8052e-11	seurat_psf_0
65; ErbB-signaling-pathway	ErbB_signaling_pathway	MYC	DNA; Adhesion	3.18822e-13	-0.939359	1	1	2.26045e-10	seurat_psf_0
78; Hippo-signaling-pathway	Hippo_signaling_pathway	SOX2	Anti-apoptotic genes; Pro-proliferation genes	6.08069e-13	-0.752155	1	1	4.31121e-10	seurat_psf_0
132; NF-kappa-B-signaling-pathway	NF_kappa_B_signaling_pathway	VCAM1	Inflammation	5.96205e-11	-0.81618	1	1	4.2271e-08	seurat_psf_0
88; C-type-lectin-receptor-signaling-pathway	C_type_lectin_receptor_signaling_pathway	IL23A	Th1 Th17 cell differentiation	2.05066e-09	-0.731432	1	1	1.45392e-06	seurat_psf_0
149; C-type-lectin-receptor-signaling-pathway	C_type_lectin_receptor_signaling_pathway	IL6	Th1 Th17 cell differentiation	2.50727e-09	-0.728694	1	1	1.77766e-06	seurat_psf_0
156; C-type-lectin-receptor-signaling-pathway	C_type_lectin_receptor_signaling_pathway	IL10	Th1 Th17 cell differentiation	2.84878e-09	-0.726726	1	1	2.01979e-06	seurat_psf_0
173; C-type-lectin-receptor-signaling-pathway	C_type_lectin_receptor_signaling_pathway	C00584	Th1 Th17 cell differentiation	2.84878e-09	-0.726726	1	1	2.01979e-06	seurat_psf_0
50; NF-kappa-B-signaling-pathway	NF_kappa_B_signaling_pathway	NFKBIA	Negative feedback	7.03967e-09	-0.93156	1	1	4.99113e-06	seurat_psf_0
128; NF-kappa-B-signaling-pathway	NF_kappa_B_signaling_pathway	IL1B	Positive feedback	2.098e-08	-0.665441	1	1	1.48748e-05	seurat_psf_0
114; NF-kappa-B-signaling-pathway	NF_kappa_B_signaling_pathway	BCL2A1	Survival	2.96103e-08	-0.672709	1	1	2.09937e-05	seurat_psf_0
53; NF-kappa-B-signaling-pathway	NF_kappa_B_signaling_pathway	CXCL8	Survival	3.49085e-08	-0.665501	1	1	2.47501e-05	seurat_psf_0
115; NF-kappa-B-signaling-pathway	NF_kappa_B_signaling_pathway	XIAP	Survival	3.49085e-08	-0.665501	1	1	2.47501e-05	seurat_psf_0
130; NF-kappa-B-signaling-pathway	NF_kappa_B_signaling_pathway	TNF	Positive feedback	3.49085e-08	-0.665501	1	1	2.47501e-05	seurat_psf_0
133; NF-kappa-B-signaling-pathway	NF_kappa_B_signaling_pathway	CXCL2	Inflammation	3.49085e-08	-0.665501	1	1	2.47501e-05	seurat_psf_0
74; Hippo-signaling-pathway	Hippo_signaling_pathway	AXIN1	Anti-apoptotic genes; Pro-proliferation genes	3.59971e-08	-0.5625	1	1	2.55219e-05	seurat_psf_0
131; NF-kappa-B-signaling-pathway	NF_kappa_B_signaling_pathway	CCL4L1	Inflammation	6.01361e-08	-0.653538	1	1	4.26365e-05	seurat_psf_0
113; NF-kappa-B-signaling-pathway	NF_kappa_B_signaling_pathway	CFLAR	Survival	6.38786e-08	-0.738838	1	1	4.529e-05	seurat_psf_0
51; NF-kappa-B-signaling-pathway	NF_kappa_B_signaling_pathway	TNFAIP3	Negative feedback	8.70449e-08	-0.65932	1	1	6.17148e-05	seurat_psf_0
52; NF-kappa-B-signaling-pathway	NF_kappa_B_signaling_pathway	TRAF1	Survival	1.09277e-07	-0.688697	1	1	7.74773e-05	seurat_psf_0
9; Insulin-signaling-pathway	Insulin_signaling_pathway	ELK1	DNA; Proliferation differentiation	1.19508e-07	-0.713432	1	1	8.47314e-05	seurat_psf_0
4; NF-kappa-B-signaling-pathway	NF_kappa_B_signaling_pathway	BIRC2	Survival	1.28381e-07	-0.704607	1	1	9.10223e-05	seurat_psf_0
5; T-cell-receptor-signaling-pathway	T_cell_receptor_signaling_pathway	CDK4	Proliferation Differentation; Immuno response	1.53003e-07	-0.687327	1	1	0.000108479	seurat_psf_0
116; NF-kappa-B-signaling-pathway	NF_kappa_B_signaling_pathway	GADD45B	Survival	3.5693e-07	-0.682443	1	1	0.000253063	seurat_psf_0
79; C-type-lectin-receptor-signaling-pathway	C_type_lectin_receptor_signaling_pathway	IL1B	Th1 Th17 cell differentiation	5.68933e-07	-0.64499	1	1	0.000403373	seurat_psf_0
76; C-type-lectin-receptor-signaling-pathway	C_type_lectin_receptor_signaling_pathway	IL23A	Th1 Th17 cell differentiation	6.76599e-07	-0.649833	1	1	0.000479708	seurat_psf_0
77; C-type-lectin-receptor-signaling-pathway	C_type_lectin_receptor_signaling_pathway	IL6	Th1 Th17 cell differentiation	7.96257e-07	-0.64524	1	1	0.000564546	seurat_psf_0
64; C-type-lectin-receptor-signaling-pathway	C_type_lectin_receptor_signaling_pathway	IL1B	Th1 Th17 cell differentiation	1.14038e-06	-0.639481	1	1	0.000808529	seurat_psf_0
62; C-type-lectin-receptor-signaling-pathway	C_type_lectin_receptor_signaling_pathway	IL23A	Th1 Th17 cell differentiation	1.34688e-06	-0.644177	1	1	0.000954936	seurat_psf_0
129; C-type-lectin-receptor-signaling-pathway	C_type_lectin_receptor_signaling_pathway	IL12A	Th1 Th17 cell differentiation	1.42714e-06	-0.658519	1	1	0.00101184	seurat_psf_0
63; C-type-lectin-receptor-signaling-pathway	C_type_lectin_receptor_signaling_pathway	IL6	Th1 Th17 cell differentiation	1.60048e-06	-0.639951	1	1	0.00113474	seurat_psf_0
101; C-type-lectin-receptor-signaling-pathway	C_type_lectin_receptor_signaling_pathway	TNF	Th1 Th17 cell differentiation	1.71114e-06	-0.63869	1	1	0.0012132	seurat_psf_0
3; NF-kappa-B-signaling-pathway	NF_kappa_B_signaling_pathway	BCL2	Survival	2.16075e-06	-0.690125	1	1	0.00153197	seurat_psf_0
129; NF-kappa-B-signaling-pathway	NF_kappa_B_signaling_pathway	PTGS2	Inflammation	1.24679e-05	-0.622502	1	1	0.00883973	seurat_psf_0
142; NF-kappa-B-signaling-pathway	NF_kappa_B_signaling_pathway	NFKB2	Activation of noncanonical pathway	1.7793e-05	-0.683344	1	1	0.0126152	seurat_psf_0
109; Chemokine-signaling-pathway	Chemokine_signaling_pathway	MAPK1	DNA; Cytokine production; Cellular gowth and differentiation; Cell survival; Migration; Apoptosis	3.53647e-05	-0.679149	1	1	0.0250736	seurat_psf_0
32; Insulin-signaling-pathway	Insulin_signaling_pathway	EIF4E	Protein synthesis	3.8638e-05	-0.610072	1	1	0.0273943	seurat_psf_0
2; NF-kappa-B-signaling-pathway	NF_kappa_B_signaling_pathway	BCL2L1	Survival	6.01252e-05	-0.659812	1	1	0.0426288	seurat_psf_0
3; NF-kappa-B-signaling-pathway	NF_kappa_B_signaling_pathway	BCL2	Survival	1.57083e-86	1.3632	1	1	1.11372e-83	seurat_psf_1
116; NF-kappa-B-signaling-pathway	NF_kappa_B_signaling_pathway	GADD45B	Survival	7.12567e-84	1.28384	1	1	5.0521e-81	seurat_psf_1
52; NF-kappa-B-signaling-pathway	NF_kappa_B_signaling_pathway	TRAF1	Survival	5.06143e-83	1.32995	1	1	3.58855e-80	seurat_psf_1
129; NF-kappa-B-signaling-pathway	NF_kappa_B_signaling_pathway	PTGS2	Inflammation	1.91873e-82	1.27534	1	1	1.36038e-79	seurat_psf_1
113; NF-kappa-B-signaling-pathway	NF_kappa_B_signaling_pathway	CFLAR	Survival	1.39436e-81	1.33422	1	1	9.88598e-79	seurat_psf_1
53; NF-kappa-B-signaling-pathway	NF_kappa_B_signaling_pathway	CXCL8	Survival	1.56237e-81	1.26388	1	1	1.10772e-78	seurat_psf_1
115; NF-kappa-B-signaling-pathway	NF_kappa_B_signaling_pathway	XIAP	Survival	1.56237e-81	1.26388	1	1	1.10772e-78	seurat_psf_1
130; NF-kappa-B-signaling-pathway	NF_kappa_B_signaling_pathway	TNF	Positive feedback	1.56237e-81	1.26388	1	1	1.10772e-78	seurat_psf_1
133; NF-kappa-B-signaling-pathway	NF_kappa_B_signaling_pathway	CXCL2	Inflammation	1.56237e-81	1.26388	1	1	1.10772e-78	seurat_psf_1
128; NF-kappa-B-signaling-pathway	NF_kappa_B_signaling_pathway	IL1B	Positive feedback	1.60452e-81	1.25737	1	1	1.13761e-78	seurat_psf_1
4; NF-kappa-B-signaling-pathway	NF_kappa_B_signaling_pathway	BIRC2	Survival	1.73581e-81	1.25861	1	1	1.23069e-78	seurat_psf_1
131; NF-kappa-B-signaling-pathway	NF_kappa_B_signaling_pathway	CCL4L1	Inflammation	3.16921e-81	1.25623	1	1	2.24697e-78	seurat_psf_1
114; NF-kappa-B-signaling-pathway	NF_kappa_B_signaling_pathway	BCL2A1	Survival	3.93387e-81	1.27143	1	1	2.78912e-78	seurat_psf_1
51; NF-kappa-B-signaling-pathway	NF_kappa_B_signaling_pathway	TNFAIP3	Negative feedback	1.39761e-80	1.27144	1	1	9.90905e-78	seurat_psf_1
142; NF-kappa-B-signaling-pathway	NF_kappa_B_signaling_pathway	NFKB2	Activation of noncanonical pathway	2.36815e-77	1.26218	1	1	1.67902e-74	seurat_psf_1
50; NF-kappa-B-signaling-pathway	NF_kappa_B_signaling_pathway	NFKBIA	Negative feedback	4.82175e-76	1.63249	1	1	3.41862e-73	seurat_psf_1
2; NF-kappa-B-signaling-pathway	NF_kappa_B_signaling_pathway	BCL2L1	Survival	6.82193e-74	1.25253	1	1	4.83675e-71	seurat_psf_1
132; NF-kappa-B-signaling-pathway	NF_kappa_B_signaling_pathway	VCAM1	Inflammation	1.04169e-72	1.48061	1	1	7.38558e-70	seurat_psf_1
40; TNF-signaling-pathway	TNF_signaling_pathway	JUN		3.31407e-70	0.888195	1	1	2.34968e-67	seurat_psf_1
71; Apoptosis	Apoptosis	GADD45G	Pro-survival genes	4.1718e-68	0.70477	1	1	2.9578e-65	seurat_psf_1
174; NOD-like-receptor-signaling-pathway	NOD_like_receptor_signaling_pathway	CCL2	Chemokines	2.01761e-66	0.752802	1	1	1.43049e-63	seurat_psf_1
183; NOD-like-receptor-signaling-pathway	NOD_like_receptor_signaling_pathway	CAMP	Antimicrobial peptides; Defensins	2.22071e-66	0.787009	1	1	1.57448e-63	seurat_psf_1
171; NOD-like-receptor-signaling-pathway	NOD_like_receptor_signaling_pathway	TNF	Pro-inflammatory cytokines	2.80102e-65	0.751623	1	1	1.98592e-62	seurat_psf_1
172; NOD-like-receptor-signaling-pathway	NOD_like_receptor_signaling_pathway	CXCL8	Chemokines	2.80102e-65	0.751623	1	1	1.98592e-62	seurat_psf_1
173; NOD-like-receptor-signaling-pathway	NOD_like_receptor_signaling_pathway	CXCL1	Chemokines	2.80102e-65	0.751623	1	1	1.98592e-62	seurat_psf_1
178; NOD-like-receptor-signaling-pathway	NOD_like_receptor_signaling_pathway	IL1B	Pro-inflammatory cytokines	7.82064e-65	0.750231	1	1	5.54483e-62	seurat_psf_1
170; NOD-like-receptor-signaling-pathway	NOD_like_receptor_signaling_pathway	IL6	Pro-inflammatory cytokines	8.46003e-65	0.75402	1	1	5.99816e-62	seurat_psf_1
182; NOD-like-receptor-signaling-pathway	NOD_like_receptor_signaling_pathway	C16054...		1.52997e-64	0.715339	1	1	1.08475e-61	seurat_psf_1
10; Apoptosis	Apoptosis	BIRC2	Pro-survival genes	1.6753e-64	0.647472	1	1	1.18779e-61	seurat_psf_1
51; RIG-I-like-receptor-signaling-pathway	RIG_I_like_receptor_signaling_pathway	CXCL8	Inflammatory cytokines; Protein synthesis; Growth arrest; Dendrition cell activation; NK cell activation; Antibody production; Apoptosis	2.277e-64	0.564175	1	1	1.61439e-61	seurat_psf_1
52; RIG-I-like-receptor-signaling-pathway	RIG_I_like_receptor_signaling_pathway	TNF	Inflammatory cytokines; Protein synthesis; Growth arrest; Dendrition cell activation; NK cell activation; Antibody production; Apoptosis	2.277e-64	0.564175	1	1	1.61439e-61	seurat_psf_1
54; RIG-I-like-receptor-signaling-pathway	RIG_I_like_receptor_signaling_pathway	CXCL10	Inflammatory cytokines; Protein synthesis; Growth arrest; Dendrition cell activation; NK cell activation; Antibody production; Apoptosis	4.45788e-64	0.592373	1	1	3.16064e-61	seurat_psf_1
70; Apoptosis	Apoptosis	CFLAR	Pro-survival genes	2.27457e-63	0.743361	1	1	1.61267e-60	seurat_psf_1
175; NOD-like-receptor-signaling-pathway	NOD_like_receptor_signaling_pathway	CCL5	Chemokines	3.06856e-63	0.750283	1	1	2.17561e-60	seurat_psf_1
73; Apoptosis	Apoptosis	TRAF1	Pro-survival genes	3.56648e-63	0.709638	1	1	2.52863e-60	seurat_psf_1
53; RIG-I-like-receptor-signaling-pathway	RIG_I_like_receptor_signaling_pathway	IL12A	Inflammatory cytokines; Protein synthesis; Growth arrest; Dendrition cell activation; NK cell activation; Antibody production; Apoptosis	8.53845e-63	0.584804	1	1	6.05376e-60	seurat_psf_1
72; Apoptosis	Apoptosis	BCL2A1	Pro-survival genes	1.62475e-62	0.655196	1	1	1.15195e-59	seurat_psf_1
69; Apoptosis	Apoptosis	PTPN13	Pro-survival genes	2.81034e-62	0.638051	1	1	1.99253e-59	seurat_psf_1
138; TNF-signaling-pathway	TNF_signaling_pathway	NFKB1	Degradation; Cell survival	1.35364e-60	0.606563	1	1	9.5973e-58	seurat_psf_1
169; NOD-like-receptor-signaling-pathway	NOD_like_receptor_signaling_pathway	IL18	Pro-inflammatory cytokines	2.05272e-56	0.775447	1	1	1.45538e-53	seurat_psf_1
3; Apoptosis	Apoptosis	BCL2L1	Pro-survival genes	3.96257e-50	0.645822	1	1	2.80946e-47	seurat_psf_1
18; RIG-I-like-receptor-signaling-pathway	RIG_I_like_receptor_signaling_pathway	IFNA1	Type 1 interfeons; Protein synthesis; Growth arrest; Dendrition cell activation; NK cell activation; Antibody production; Apoptosis	2.87747e-48	0.536029	1	1	2.04013e-45	seurat_psf_1
19; RIG-I-like-receptor-signaling-pathway	RIG_I_like_receptor_signaling_pathway	IFNB1	Type 1 interfeons; Protein synthesis; Growth arrest; Dendrition cell activation; NK cell activation; Antibody production; Apoptosis	2.87747e-48	0.536029	1	1	2.04013e-45	seurat_psf_1
48; RIG-I-like-receptor-signaling-pathway	RIG_I_like_receptor_signaling_pathway	IFNW1	Type 1 interfeons; Protein synthesis; Growth arrest; Dendrition cell activation; NK cell activation; Antibody production; Apoptosis	2.87747e-48	0.536029	1	1	2.04013e-45	seurat_psf_1
49; RIG-I-like-receptor-signaling-pathway	RIG_I_like_receptor_signaling_pathway	IFNE	Type 1 interfeons; Protein synthesis; Growth arrest; Dendrition cell activation; NK cell activation; Antibody production; Apoptosis	2.87747e-48	0.536029	1	1	2.04013e-45	seurat_psf_1
50; RIG-I-like-receptor-signaling-pathway	RIG_I_like_receptor_signaling_pathway	IFNK	Type 1 interfeons; Protein synthesis; Growth arrest; Dendrition cell activation; NK cell activation; Antibody production; Apoptosis	2.87747e-48	0.536029	1	1	2.04013e-45	seurat_psf_1
145; Endocrine-resistance	Endocrine_resistance	FOS	DNA; CoA overexpression AP1/SP1 overexpression; Transcription Proliferation	7.62978e-48	0.635267	1	1	5.40951e-45	seurat_psf_1
6; B-cell-receptor-signaling-pathway	B_cell_receptor_signaling_pathway	NFKB1	DNA; B cell ontogeny; Autoimmunity; Anergy; Immuno response Ig production GC formation	4.9931e-47	0.672623	1	1	3.54011e-44	seurat_psf_1
12; Toll-like-receptor-signaling-pathway	Toll_like_receptor_signaling_pathway	NFKB1	Degradation	1.0664e-46	0.702192	1	1	7.56074e-44	seurat_psf_1
96; NF-kappa-B-signaling-pathway	NF_kappa_B_signaling_pathway	BCL2A1	Survival	8.25835e-43	0.513349	1	1	5.85517e-40	seurat_psf_1
101; C-type-lectin-receptor-signaling-pathway	C_type_lectin_receptor_signaling_pathway	TNF	Th1 Th17 cell differentiation	1.55583e-42	0.544178	1	1	1.10308e-39	seurat_psf_1
64; C-type-lectin-receptor-signaling-pathway	C_type_lectin_receptor_signaling_pathway	IL1B	Th1 Th17 cell differentiation	2.13899e-42	0.54168	1	1	1.51654e-39	seurat_psf_1
63; C-type-lectin-receptor-signaling-pathway	C_type_lectin_receptor_signaling_pathway	IL6	Th1 Th17 cell differentiation	2.54803e-42	0.54614	1	1	1.80655e-39	seurat_psf_1
62; C-type-lectin-receptor-signaling-pathway	C_type_lectin_receptor_signaling_pathway	IL23A	Th1 Th17 cell differentiation	2.71789e-42	0.533961	1	1	1.92698e-39	seurat_psf_1
77; C-type-lectin-receptor-signaling-pathway	C_type_lectin_receptor_signaling_pathway	IL6	Th1 Th17 cell differentiation	4.44304e-42	0.503775	1	1	3.15012e-39	seurat_psf_1
79; C-type-lectin-receptor-signaling-pathway	C_type_lectin_receptor_signaling_pathway	IL1B	Th1 Th17 cell differentiation	4.67049e-42	0.500255	1	1	3.31138e-39	seurat_psf_1
78; C-type-lectin-receptor-signaling-pathway	C_type_lectin_receptor_signaling_pathway	IL12A	Th1 Th17 cell differentiation	6.21163e-42	0.550565	1	1	4.40404e-39	seurat_psf_1
129; C-type-lectin-receptor-signaling-pathway	C_type_lectin_receptor_signaling_pathway	IL12A	Th1 Th17 cell differentiation	5.89468e-40	0.699308	1	1	4.17933e-37	seurat_psf_1
156; C-type-lectin-receptor-signaling-pathway	C_type_lectin_receptor_signaling_pathway	IL10	Th1 Th17 cell differentiation	1.90291e-39	0.660793	1	1	1.34916e-36	seurat_psf_1
173; C-type-lectin-receptor-signaling-pathway	C_type_lectin_receptor_signaling_pathway	C00584	Th1 Th17 cell differentiation	1.90291e-39	0.660793	1	1	1.34916e-36	seurat_psf_1
88; C-type-lectin-receptor-signaling-pathway	C_type_lectin_receptor_signaling_pathway	IL23A	Th1 Th17 cell differentiation	2.1323e-39	0.649906	1	1	1.5118e-36	seurat_psf_1
149; C-type-lectin-receptor-signaling-pathway	C_type_lectin_receptor_signaling_pathway	IL6	Th1 Th17 cell differentiation	3.14956e-39	0.661909	1	1	2.23304e-36	seurat_psf_1
108; NF-kappa-B-signaling-pathway	NF_kappa_B_signaling_pathway	IKBKG		7.1021e-39	0.637156	1	1	5.03539e-36	seurat_psf_1
56; ErbB-signaling-pathway	ErbB_signaling_pathway	JUN	DNA; Angiogenesis	6.44639e-36	0.593081	1	1	4.57049e-33	seurat_psf_1
95; NF-kappa-B-signaling-pathway	NF_kappa_B_signaling_pathway	BCL2L1	Survival	1.69992e-33	0.527646	1	1	1.20524e-30	seurat_psf_1
86; Apoptosis	Apoptosis	BCL2L11	Pro-apoptotic genes	9.41815e-33	0.575546	1	1	6.67747e-30	seurat_psf_1
85; Apoptosis	Apoptosis	FASLG	Pro-apoptotic genes	6.27203e-32	0.549074	1	1	4.44687e-29	seurat_psf_1
33; C-type-lectin-receptor-signaling-pathway	C_type_lectin_receptor_signaling_pathway	IL1B	Th1 Th17 cell differentiation	1.34774e-31	0.517968	1	1	9.55547e-29	seurat_psf_1
84; Apoptosis	Apoptosis	FAS	Pro-apoptotic genes	3.15871e-31	0.565155	1	1	2.23952e-28	seurat_psf_1
123; Endocrine-resistance	Endocrine_resistance	CARM1	DNA; CoA overexpression AP1/SP1 overexpression; Transcription Proliferation	2.43331e-30	0.522069	1	1	1.72522e-27	seurat_psf_1
137; NF-kappa-B-signaling-pathway	NF_kappa_B_signaling_pathway	ICAM1	Lymphocyte adhesion, T-cell costimulation	8.17116e-29	0.622228	1	1	5.79335e-26	seurat_psf_1
114; Apoptosis	Apoptosis	HRK	Pro-apoptotic genes	1.82671e-28	0.625601	1	1	1.29514e-25	seurat_psf_1
83; Apoptosis	Apoptosis	TP53	Pro-apoptotic genes	2.53044e-28	0.547659	1	1	1.79408e-25	seurat_psf_1
134; NF-kappa-B-signaling-pathway	NF_kappa_B_signaling_pathway	CCL21	Lymphoid-tissue homing	3.8404e-28	0.604741	1	1	2.72285e-25	seurat_psf_1
54; NF-kappa-B-signaling-pathway	NF_kappa_B_signaling_pathway	CCL13	Lymphoid-tissue homing	5.80698e-28	0.588324	1	1	4.11715e-25	seurat_psf_1
136; NF-kappa-B-signaling-pathway	NF_kappa_B_signaling_pathway	TNFSF13B	B-cell development; B-cell survival	6.28504e-28	0.586791	1	1	4.45609e-25	seurat_psf_1
135; NF-kappa-B-signaling-pathway	NF_kappa_B_signaling_pathway	CCL19	Lymphoid-tissue homing	1.28577e-27	0.607592	1	1	9.11611e-25	seurat_psf_1
28; C-type-lectin-receptor-signaling-pathway	C_type_lectin_receptor_signaling_pathway	IL12A	Th1 Th17 cell differentiation	4.93947e-27	0.534031	1	1	3.50209e-24	seurat_psf_1
148; C-type-lectin-receptor-signaling-pathway	C_type_lectin_receptor_signaling_pathway	IL1B	Th1 Th17 cell differentiation	8.4711e-27	0.515633	1	1	6.00601e-24	seurat_psf_1
55; NF-kappa-B-signaling-pathway	NF_kappa_B_signaling_pathway	CXCL12	Myeloiesis and B-cell lymphopoieses	2.20911e-20	0.506028	1	1	1.56626e-17	seurat_psf_1
70; mTOR-signaling-pathway	mTOR_signaling_pathway	TTI1		2.12466e-19	0.514001	1	1	1.50639e-16	seurat_psf_1
161; C-type-lectin-receptor-signaling-pathway	C_type_lectin_receptor_signaling_pathway	CCL17	Th2 cell differentiation	3.67512e-16	0.567564	1	1	2.60566e-13	seurat_psf_1
55; C-type-lectin-receptor-signaling-pathway	C_type_lectin_receptor_signaling_pathway	IL10	Th2 cell differentiation	1.52775e-14	0.559939	1	1	1.08318e-11	seurat_psf_1
160; C-type-lectin-receptor-signaling-pathway	C_type_lectin_receptor_signaling_pathway	CCL22	Th2 cell differentiation	2.11404e-14	0.552295	1	1	1.49885e-11	seurat_psf_1
81; mTOR-signaling-pathway	mTOR_signaling_pathway	CLIP1	Microtubule organization	3.66605e-13	0.565176	1	1	2.59923e-10	seurat_psf_1
12; Hippo-signaling-pathway	Hippo_signaling_pathway	CTGF	Anti-apoptotic genes; Pro-proliferation genes	5.23662e-10	0.563759	1	1	3.71276e-07	seurat_psf_1
120; C-type-lectin-receptor-signaling-pathway	C_type_lectin_receptor_signaling_pathway	IL17D	Th1 Th17 cell differentiation	8.03177e-85	-0.552303	1	1	5.69453e-82	seurat_psf_2
35; Ras-signaling-pathway	Ras_signaling_pathway	NFKB1	Cell survival; Cell growth; Cell migration; Cell cycle progression; Transcription	1.87389e-80	-0.508409	1	1	1.32859e-77	seurat_psf_2
83; Apoptosis	Apoptosis	TP53	Pro-apoptotic genes	4.79941e-74	-0.714056	1	1	3.40278e-71	seurat_psf_2
36; TNF-signaling-pathway	TNF_signaling_pathway	CREB3		4.40049e-69	-0.966163	1	1	3.11995e-66	seurat_psf_2
116; NF-kappa-B-signaling-pathway	NF_kappa_B_signaling_pathway	GADD45B	Survival	7.43312e-68	-0.982074	1	1	5.27008e-65	seurat_psf_2
164; C-type-lectin-receptor-signaling-pathway	C_type_lectin_receptor_signaling_pathway	EGR2	Th1 Th17 cell differentiation	1.57744e-67	-0.557239	1	1	1.11841e-64	seurat_psf_2
3; NF-kappa-B-signaling-pathway	NF_kappa_B_signaling_pathway	BCL2	Survival	2.39941e-67	-1.03582	1	1	1.70118e-64	seurat_psf_2
4; NF-kappa-B-signaling-pathway	NF_kappa_B_signaling_pathway	BIRC2	Survival	7.16248e-67	-0.984589	1	1	5.0782e-64	seurat_psf_2
142; NF-kappa-B-signaling-pathway	NF_kappa_B_signaling_pathway	NFKB2	Activation of noncanonical pathway	2.52957e-66	-1.01593	1	1	1.79346e-63	seurat_psf_2
182; NOD-like-receptor-signaling-pathway	NOD_like_receptor_signaling_pathway	C16054...		3.14264e-64	-0.636628	1	1	2.22813e-61	seurat_psf_2
129; NF-kappa-B-signaling-pathway	NF_kappa_B_signaling_pathway	PTGS2	Inflammation	5.25393e-63	-0.889683	1	1	3.72503e-60	seurat_psf_2
58; AMPK-signaling-pathway	AMPK_signaling_pathway	SCD	Repressed fatty acid syntheses	4.15583e-62	0.564727	1	1	2.94648e-59	seurat_psf_2
52; NF-kappa-B-signaling-pathway	NF_kappa_B_signaling_pathway	TRAF1	Survival	5.06352e-62	-0.974253	1	1	3.59004e-59	seurat_psf_2
51; NF-kappa-B-signaling-pathway	NF_kappa_B_signaling_pathway	TNFAIP3	Negative feedback	7.90931e-62	-0.928515	1	1	5.6077e-59	seurat_psf_2
53; NF-kappa-B-signaling-pathway	NF_kappa_B_signaling_pathway	CXCL8	Survival	3.17024e-61	-0.917809	1	1	2.2477e-58	seurat_psf_2
115; NF-kappa-B-signaling-pathway	NF_kappa_B_signaling_pathway	XIAP	Survival	3.17024e-61	-0.917809	1	1	2.2477e-58	seurat_psf_2
130; NF-kappa-B-signaling-pathway	NF_kappa_B_signaling_pathway	TNF	Positive feedback	3.17024e-61	-0.917809	1	1	2.2477e-58	seurat_psf_2
133; NF-kappa-B-signaling-pathway	NF_kappa_B_signaling_pathway	CXCL2	Inflammation	3.17024e-61	-0.917809	1	1	2.2477e-58	seurat_psf_2
71; Apoptosis	Apoptosis	GADD45G	Pro-survival genes	4.48258e-61	-0.547818	1	1	3.17815e-58	seurat_psf_2
128; NF-kappa-B-signaling-pathway	NF_kappa_B_signaling_pathway	IL1B	Positive feedback	5.01845e-61	-0.911185	1	1	3.55808e-58	seurat_psf_2
131; NF-kappa-B-signaling-pathway	NF_kappa_B_signaling_pathway	CCL4L1	Inflammation	5.06079e-61	-0.901343	1	1	3.5881e-58	seurat_psf_2
114; NF-kappa-B-signaling-pathway	NF_kappa_B_signaling_pathway	BCL2A1	Survival	6.28249e-61	-0.918858	1	1	4.45429e-58	seurat_psf_2
171; NOD-like-receptor-signaling-pathway	NOD_like_receptor_signaling_pathway	TNF	Pro-inflammatory cytokines	1.10448e-57	-0.643842	1	1	7.83075e-55	seurat_psf_2
172; NOD-like-receptor-signaling-pathway	NOD_like_receptor_signaling_pathway	CXCL8	Chemokines	1.10448e-57	-0.643842	1	1	7.83075e-55	seurat_psf_2
173; NOD-like-receptor-signaling-pathway	NOD_like_receptor_signaling_pathway	CXCL1	Chemokines	1.10448e-57	-0.643842	1	1	7.83075e-55	seurat_psf_2
170; NOD-like-receptor-signaling-pathway	NOD_like_receptor_signaling_pathway	IL6	Pro-inflammatory cytokines	1.43543e-57	-0.646353	1	1	1.01772e-54	seurat_psf_2
174; NOD-like-receptor-signaling-pathway	NOD_like_receptor_signaling_pathway	CCL2	Chemokines	1.84804e-57	-0.64516	1	1	1.31026e-54	seurat_psf_2
178; NOD-like-receptor-signaling-pathway	NOD_like_receptor_signaling_pathway	IL1B	Pro-inflammatory cytokines	5.28513e-57	-0.639998	1	1	3.74716e-54	seurat_psf_2
183; NOD-like-receptor-signaling-pathway	NOD_like_receptor_signaling_pathway	CAMP	Antimicrobial peptides; Defensins	1.52181e-56	-0.63766	1	1	1.07897e-53	seurat_psf_2
175; NOD-like-receptor-signaling-pathway	NOD_like_receptor_signaling_pathway	CCL5	Chemokines	1.62998e-56	-0.660025	1	1	1.15566e-53	seurat_psf_2
12; T-cell-receptor-signaling-pathway	T_cell_receptor_signaling_pathway	IL2	Proliferation Differentation; Immuno response	1.25654e-55	-0.788541	1	1	8.90884e-53	seurat_psf_2
6; B-cell-receptor-signaling-pathway	B_cell_receptor_signaling_pathway	NFKB1	DNA; B cell ontogeny; Autoimmunity; Anergy; Immuno response Ig production GC formation	1.38055e-55	-0.655763	1	1	9.78811e-53	seurat_psf_2
113; NF-kappa-B-signaling-pathway	NF_kappa_B_signaling_pathway	CFLAR	Survival	2.35573e-54	-0.941108	1	1	1.67022e-51	seurat_psf_2
6; T-cell-receptor-signaling-pathway	T_cell_receptor_signaling_pathway	TNF	Proliferation Differentation; Immuno response	3.83547e-54	-0.745332	1	1	2.71935e-51	seurat_psf_2
7; T-cell-receptor-signaling-pathway	T_cell_receptor_signaling_pathway	CSF2	Proliferation Differentation; Immuno response	3.83547e-54	-0.745332	1	1	2.71935e-51	seurat_psf_2
8; T-cell-receptor-signaling-pathway	T_cell_receptor_signaling_pathway	IFNG	Proliferation Differentation; Immuno response	3.83547e-54	-0.745332	1	1	2.71935e-51	seurat_psf_2
9; T-cell-receptor-signaling-pathway	T_cell_receptor_signaling_pathway	IL10	Proliferation Differentation; Immuno response	3.83547e-54	-0.745332	1	1	2.71935e-51	seurat_psf_2
10; T-cell-receptor-signaling-pathway	T_cell_receptor_signaling_pathway	IL5	Proliferation Differentation; Immuno response	6.03295e-54	-0.752278	1	1	4.27736e-51	seurat_psf_2
11; T-cell-receptor-signaling-pathway	T_cell_receptor_signaling_pathway	IL4	Proliferation Differentation; Immuno response	7.39813e-54	-0.745834	1	1	5.24527e-51	seurat_psf_2
69; Apoptosis	Apoptosis	PTPN13	Pro-survival genes	6.41856e-52	-0.50756	1	1	4.55076e-49	seurat_psf_2
50; NF-kappa-B-signaling-pathway	NF_kappa_B_signaling_pathway	NFKBIA	Negative feedback	1.39048e-51	-1.09696	1	1	9.85849e-49	seurat_psf_2
2; NF-kappa-B-signaling-pathway	NF_kappa_B_signaling_pathway	BCL2L1	Survival	3.35037e-51	-0.952624	1	1	2.37541e-48	seurat_psf_2
114; Apoptosis	Apoptosis	HRK	Pro-apoptotic genes	7.33471e-51	-0.592975	1	1	5.20031e-48	seurat_psf_2
132; NF-kappa-B-signaling-pathway	NF_kappa_B_signaling_pathway	VCAM1	Inflammation	6.58547e-50	-0.989461	1	1	4.6691e-47	seurat_psf_2
3; ErbB-signaling-pathway	ErbB_signaling_pathway	ELK1	DNA; Migration/ Invasion	3.37638e-48	-1.07068	1	1	2.39385e-45	seurat_psf_2
169; NOD-like-receptor-signaling-pathway	NOD_like_receptor_signaling_pathway	IL18	Pro-inflammatory cytokines	1.28064e-46	-0.619269	1	1	9.07975e-44	seurat_psf_2
78; C-type-lectin-receptor-signaling-pathway	C_type_lectin_receptor_signaling_pathway	IL12A	Th1 Th17 cell differentiation	8.55338e-46	-0.792969	1	1	6.06435e-43	seurat_psf_2
86; Apoptosis	Apoptosis	BCL2L11	Pro-apoptotic genes	3.78939e-43	-0.513539	1	1	2.68668e-40	seurat_psf_2
19; mTOR-signaling-pathway	mTOR_signaling_pathway	PRKCA	Cytoskeletal organization	8.89265e-43	-0.628128	1	1	6.30489e-40	seurat_psf_2
64; C-type-lectin-receptor-signaling-pathway	C_type_lectin_receptor_signaling_pathway	IL1B	Th1 Th17 cell differentiation	1.20593e-42	-0.743382	1	1	8.55003e-40	seurat_psf_2
79; C-type-lectin-receptor-signaling-pathway	C_type_lectin_receptor_signaling_pathway	IL1B	Th1 Th17 cell differentiation	1.55976e-42	-0.751875	1	1	1.10587e-39	seurat_psf_2
77; C-type-lectin-receptor-signaling-pathway	C_type_lectin_receptor_signaling_pathway	IL6	Th1 Th17 cell differentiation	1.81801e-42	-0.765902	1	1	1.28897e-39	seurat_psf_2
63; C-type-lectin-receptor-signaling-pathway	C_type_lectin_receptor_signaling_pathway	IL6	Th1 Th17 cell differentiation	2.04228e-42	-0.756803	1	1	1.44798e-39	seurat_psf_2
101; C-type-lectin-receptor-signaling-pathway	C_type_lectin_receptor_signaling_pathway	TNF	Th1 Th17 cell differentiation	2.05048e-42	-0.757799	1	1	1.45379e-39	seurat_psf_2
40; TNF-signaling-pathway	TNF_signaling_pathway	JUN		4.8546e-42	-0.651743	1	1	3.44191e-39	seurat_psf_2
53; RIG-I-like-receptor-signaling-pathway	RIG_I_like_receptor_signaling_pathway	IL12A	Inflammatory cytokines; Protein synthesis; Growth arrest; Dendrition cell activation; NK cell activation; Antibody production; Apoptosis	1.46117e-41	-0.50516	1	1	1.03597e-38	seurat_psf_2
62; C-type-lectin-receptor-signaling-pathway	C_type_lectin_receptor_signaling_pathway	IL23A	Th1 Th17 cell differentiation	2.67954e-41	-0.733205	1	1	1.89979e-38	seurat_psf_2
76; C-type-lectin-receptor-signaling-pathway	C_type_lectin_receptor_signaling_pathway	IL23A	Th1 Th17 cell differentiation	2.95932e-41	-0.742907	1	1	2.09815e-38	seurat_psf_2
108; NF-kappa-B-signaling-pathway	NF_kappa_B_signaling_pathway	IKBKG		8.60984e-38	-0.687597	1	1	6.10437e-35	seurat_psf_2
134; NF-kappa-B-signaling-pathway	NF_kappa_B_signaling_pathway	CCL21	Lymphoid-tissue homing	8.77933e-38	-0.752043	1	1	6.22455e-35	seurat_psf_2
54; NF-kappa-B-signaling-pathway	NF_kappa_B_signaling_pathway	CCL13	Lymphoid-tissue homing	1.26138e-37	-0.746267	1	1	8.9432e-35	seurat_psf_2
52; MAPK-signaling-pathway	MAPK_signaling_pathway	MEF2C	DNA; Proliferation differentiation, inflammation	1.47924e-37	-0.538647	1	1	1.04878e-34	seurat_psf_2
136; NF-kappa-B-signaling-pathway	NF_kappa_B_signaling_pathway	TNFSF13B	B-cell development; B-cell survival	2.09631e-37	-0.739431	1	1	1.48628e-34	seurat_psf_2
137; NF-kappa-B-signaling-pathway	NF_kappa_B_signaling_pathway	ICAM1	Lymphocyte adhesion, T-cell costimulation	2.47826e-37	-0.736401	1	1	1.75709e-34	seurat_psf_2
7; Apoptosis	Apoptosis	ENDOG	DNA fragmentation; Apoptosis	5.12639e-37	-0.538613	1	1	3.63461e-34	seurat_psf_2
135; NF-kappa-B-signaling-pathway	NF_kappa_B_signaling_pathway	CCL19	Lymphoid-tissue homing	8.54492e-37	-0.692192	1	1	6.05835e-34	seurat_psf_2
28; C-type-lectin-receptor-signaling-pathway	C_type_lectin_receptor_signaling_pathway	IL12A	Th1 Th17 cell differentiation	2.66976e-32	-0.575538	1	1	1.89286e-29	seurat_psf_2
155; Chemokine-signaling-pathway	Chemokine_signaling_pathway	PXN	Migration	2.94334e-32	-0.525411	1	1	2.08683e-29	seurat_psf_2
43; Ras-signaling-pathway	Ras_signaling_pathway	ELK1	Gene expression	2.40422e-31	-0.572144	1	1	1.70459e-28	seurat_psf_2
129; C-type-lectin-receptor-signaling-pathway	C_type_lectin_receptor_signaling_pathway	IL12A	Th1 Th17 cell differentiation	3.08065e-31	-0.802351	1	1	2.18418e-28	seurat_psf_2
38; C-type-lectin-receptor-signaling-pathway	C_type_lectin_receptor_signaling_pathway	IL12A	Th1 Th17 cell differentiation	7.42371e-30	-0.598239	1	1	5.26341e-27	seurat_psf_2
5; T-cell-receptor-signaling-pathway	T_cell_receptor_signaling_pathway	CDK4	Proliferation Differentation; Immuno response	1.41956e-29	-0.873942	1	1	1.00647e-26	seurat_psf_2
148; C-type-lectin-receptor-signaling-pathway	C_type_lectin_receptor_signaling_pathway	IL1B	Th1 Th17 cell differentiation	1.38177e-28	-0.534289	1	1	9.79673e-26	seurat_psf_2
149; C-type-lectin-receptor-signaling-pathway	C_type_lectin_receptor_signaling_pathway	IL6	Th1 Th17 cell differentiation	6.1588e-28	-0.777841	1	1	4.36659e-25	seurat_psf_2
156; C-type-lectin-receptor-signaling-pathway	C_type_lectin_receptor_signaling_pathway	IL10	Th1 Th17 cell differentiation	6.86332e-28	-0.777814	1	1	4.86609e-25	seurat_psf_2
173; C-type-lectin-receptor-signaling-pathway	C_type_lectin_receptor_signaling_pathway	C00584	Th1 Th17 cell differentiation	6.86332e-28	-0.777814	1	1	4.86609e-25	seurat_psf_2
9; Insulin-signaling-pathway	Insulin_signaling_pathway	ELK1	DNA; Proliferation differentiation	1.00902e-27	-0.890803	1	1	7.15396e-25	seurat_psf_2
88; C-type-lectin-receptor-signaling-pathway	C_type_lectin_receptor_signaling_pathway	IL23A	Th1 Th17 cell differentiation	3.6116e-27	-0.754353	1	1	2.56062e-24	seurat_psf_2
20; Cell-cycle	Cell_cycle	MCM2	DNA; DNA biosynthesis	3.15503e-26	-0.665911	1	1	2.23692e-23	seurat_psf_2
37; C-type-lectin-receptor-signaling-pathway	C_type_lectin_receptor_signaling_pathway	IL6	Th1 Th17 cell differentiation	4.15996e-26	-0.562532	1	1	2.94941e-23	seurat_psf_2
102; C-type-lectin-receptor-signaling-pathway	C_type_lectin_receptor_signaling_pathway	IL10	Th1 Th17 cell differentiation	6.08174e-26	-0.564839	1	1	4.31196e-23	seurat_psf_2
94; cGMP-PKG-signaling-pathway	cGMP_PKG_signaling_pathway	MAPK1	Platelet activation	2.06719e-24	-0.525509	1	1	1.46564e-21	seurat_psf_2
53; mTOR-signaling-pathway	mTOR_signaling_pathway	GRB10	Lipolysis	1.18315e-23	-0.54941	1	1	8.38856e-21	seurat_psf_2
55; NF-kappa-B-signaling-pathway	NF_kappa_B_signaling_pathway	CXCL12	Myeloiesis and B-cell lymphopoieses	1.61853e-23	-0.663193	1	1	1.14754e-20	seurat_psf_2
70; mTOR-signaling-pathway	mTOR_signaling_pathway	TTI1		2.12262e-23	-0.516062	1	1	1.50494e-20	seurat_psf_2
16; mTOR-signaling-pathway	mTOR_signaling_pathway	LPIN1	Lipid biosynthesis	1.7716e-21	-0.53068	1	1	1.25607e-18	seurat_psf_2
65; ErbB-signaling-pathway	ErbB_signaling_pathway	MYC	DNA; Adhesion	3.12967e-21	-0.941255	1	1	2.21893e-18	seurat_psf_2
62; mTOR-signaling-pathway	mTOR_signaling_pathway	TTI1		2.30696e-19	-0.539508	1	1	1.63564e-16	seurat_psf_2
81; mTOR-signaling-pathway	mTOR_signaling_pathway	CLIP1	Microtubule organization	7.65197e-19	-0.668995	1	1	5.42525e-16	seurat_psf_2
24; B-cell-receptor-signaling-pathway	B_cell_receptor_signaling_pathway	FOS	DNA; B cell ontogeny; Autoimmunity; Anergy; Immuno response Ig production GC formation	1.87864e-17	-0.507283	1	1	1.33196e-14	seurat_psf_2
6; Fc-epsilon-RI-signaling-pathway	Fc_epsilon_RI_signaling_pathway	C00696	Generation of eicosanoids	9.7591e-16	-0.737249	1	1	6.9192e-13	seurat_psf_2
7; Fc-epsilon-RI-signaling-pathway	Fc_epsilon_RI_signaling_pathway	C05952	Generation of eicosanoids	9.7591e-16	-0.737249	1	1	6.9192e-13	seurat_psf_2
8; Fc-epsilon-RI-signaling-pathway	Fc_epsilon_RI_signaling_pathway	C05951	Generation of eicosanoids	9.7591e-16	-0.737249	1	1	6.9192e-13	seurat_psf_2
9; Fc-epsilon-RI-signaling-pathway	Fc_epsilon_RI_signaling_pathway	C02166	Generation of eicosanoids	9.7591e-16	-0.737249	1	1	6.9192e-13	seurat_psf_2
56; mTOR-signaling-pathway	mTOR_signaling_pathway	EIF4B	Cap-dependent translocation; Protein systhesis	1.78401e-15	-0.572865	1	1	1.26486e-12	seurat_psf_2
109; Chemokine-signaling-pathway	Chemokine_signaling_pathway	MAPK1	DNA; Cytokine production; Cellular gowth and differentiation; Cell survival; Migration; Apoptosis	6.92377e-15	-0.71586	1	1	4.90895e-12	seurat_psf_2
31; mTOR-signaling-pathway	mTOR_signaling_pathway	EIF4E	Cap-dependent translocation; Protein systhesis	5.26981e-14	-0.538896	1	1	3.7363e-11	seurat_psf_2
32; Insulin-signaling-pathway	Insulin_signaling_pathway	EIF4E	Protein synthesis	7.19828e-13	-0.642849	1	1	5.10358e-10	seurat_psf_2
126; Endocrine-resistance	Endocrine_resistance	FOS	DNA; Transcription Proliferation	1.56766e-08	-0.647844	1	1	1.11147e-05	seurat_psf_2
62; Apoptosis	Apoptosis	TP53AIP1	Pro-apoptotic genes	1.65001e-215	0.529105	1	1	1.16986e-212	seurat_psf_3
64; Apoptosis	Apoptosis	TNFRSF10B	Pro-apoptotic genes	3.67827e-212	0.541272	1	1	2.6079e-209	seurat_psf_3
63; Apoptosis	Apoptosis	FAS	Pro-apoptotic genes	7.44292e-199	0.529852	1	1	5.27703e-196	seurat_psf_3
24; p53-signaling-pathway	p53_signaling_pathway	SERPINB5	Inflammhibition of angiogenesis and metastasis	4.10538e-171	0.537417	1	1	2.91071e-168	seurat_psf_3
30; p53-signaling-pathway	p53_signaling_pathway	SERPINE1	Inflammhibition of angiogenesis and metastasis	3.02941e-166	0.529868	1	1	2.14785e-163	seurat_psf_3
17; p53-signaling-pathway	p53_signaling_pathway	TP73	p53 negative feedback	9.20253e-165	0.542762	1	1	6.5246e-162	seurat_psf_3
27; p53-signaling-pathway	p53_signaling_pathway	THBS1	Inflammhibition of angiogenesis and metastasis	2.41464e-162	0.521013	1	1	1.71198e-159	seurat_psf_3
61; Apoptosis	Apoptosis	APAF1	Pro-apoptotic genes	2.55849e-155	0.514893	1	1	1.81397e-152	seurat_psf_3
22; p53-signaling-pathway	p53_signaling_pathway	STEAP3	Exosome mediated secretion	1.52262e-154	0.545069	1	1	1.07954e-151	seurat_psf_3
20; p53-signaling-pathway	p53_signaling_pathway	RRM2B	DNA repair and damage prevention	6.32389e-154	0.573059	1	1	4.48364e-151	seurat_psf_3
58; Apoptosis	Apoptosis	BID	Pro-apoptotic genes	4.54831e-152	0.538165	1	1	3.22475e-149	seurat_psf_3
70; p53-signaling-pathway	p53_signaling_pathway	AIFM2	Apoptosis	8.21134e-143	0.524991	1	1	5.82184e-140	seurat_psf_3
1; p53-signaling-pathway	p53_signaling_pathway	SIAH1	p53 negative feedback	8.75794e-143	0.540427	1	1	6.20938e-140	seurat_psf_3
3; p53-signaling-pathway	p53_signaling_pathway	GADD45G	DNA repair and damage prevention	1.16899e-130	0.516179	1	1	8.28817e-128	seurat_psf_3
56; p53-signaling-pathway	p53_signaling_pathway	SESN3	DNA repair and damage prevention	3.13925e-130	0.520318	1	1	2.22573e-127	seurat_psf_3
2; p53-signaling-pathway	p53_signaling_pathway	IGFBP3	Inhibition of IGF-1/mTOR pathway	3.66619e-128	0.603548	1	1	2.59933e-125	seurat_psf_3
56; MAPK-signaling-pathway	MAPK_signaling_pathway	TP53	p53 signaling pathway; Proliferation differentiation, inflammation	4.74565e-125	0.55218	1	1	3.36467e-122	seurat_psf_3
18; p53-signaling-pathway	p53_signaling_pathway	CCNG1	p53 negative feedback	2.38208e-116	0.572901	1	1	1.68889e-113	seurat_psf_3
21; p53-signaling-pathway	p53_signaling_pathway	DDB2	DNA repair and damage prevention	3.18627e-116	0.515662	1	1	2.25906e-113	seurat_psf_3
29; p53-signaling-pathway	p53_signaling_pathway	IGF1	Apoptosis	4.88606e-103	-0.547476	1	1	3.46422e-100	seurat_psf_3
25; p53-signaling-pathway	p53_signaling_pathway	CD82	Inflammhibition of angiogenesis and metastasis	6.70679e-98	0.520643	1	1	4.75511e-95	seurat_psf_3
33; PI3K-Akt-signaling-pathway	PI3K_Akt_signaling_pathway	TP53	Cell survival	1.08896e-92	0.672719	1	1	7.72076e-90	seurat_psf_3
19; p53-signaling-pathway	p53_signaling_pathway	COP1	p53 negative feedback	4.76589e-91	0.591981	1	1	3.37902e-88	seurat_psf_3
50; p53-signaling-pathway	p53_signaling_pathway	RCHY1	p53 negative feedback	8.86425e-85	0.53467	1	1	6.28475e-82	seurat_psf_3
23; p53-signaling-pathway	p53_signaling_pathway	PTEN	Inhibition of IGF-1/mTOR pathway	3.9882e-81	0.530341	1	1	2.82763e-78	seurat_psf_3
12; p53-signaling-pathway	p53_signaling_pathway	CCNE1	G1 arrest( sustaines); Cell cycle arrest	1.75361e-78	-0.517017	1	1	1.24331e-75	seurat_psf_3
53; p53-signaling-pathway	p53_signaling_pathway	CCND1	G1 arrest( sustaines); Cell cycle arrest	3.54481e-75	-0.577287	1	1	2.51327e-72	seurat_psf_3
15; p53-signaling-pathway	p53_signaling_pathway	TSC2	Inhibition of IGF-1/mTOR pathway	4.59822e-74	0.518055	1	1	3.26014e-71	seurat_psf_3
83; Apoptosis	Apoptosis	TP53	Pro-apoptotic genes	3.60974e-60	0.568419	1	1	2.55931e-57	seurat_psf_3
125; Endocrine-resistance	Endocrine_resistance	JUN	DNA; Transcription Proliferation	4.15547e-15	-0.908488	1	1	2.94623e-12	seurat_psf_3
3; Rap1-signaling-pathway	Rap1_signaling_pathway	MAPK1	Proliferation survival gene activation	3.12704e-14	-0.510012	1	1	2.21707e-11	seurat_psf_3
5; T-cell-receptor-signaling-pathway	T_cell_receptor_signaling_pathway	CDK4	Proliferation Differentation; Immuno response	6.8637e-10	-0.677893	1	1	4.86636e-07	seurat_psf_3
126; Endocrine-resistance	Endocrine_resistance	FOS	DNA; Transcription Proliferation	9.33192e-10	-0.63321	1	1	6.61633e-07	seurat_psf_3
109; Chemokine-signaling-pathway	Chemokine_signaling_pathway	MAPK1	DNA; Cytokine production; Cellular gowth and differentiation; Cell survival; Migration; Apoptosis	2.5728e-09	-0.660208	1	1	1.82411e-06	seurat_psf_3
10; T-cell-receptor-signaling-pathway	T_cell_receptor_signaling_pathway	IL5	Proliferation Differentation; Immuno response	3.48032e-08	-0.518956	1	1	2.46755e-05	seurat_psf_3
11; T-cell-receptor-signaling-pathway	T_cell_receptor_signaling_pathway	IL4	Proliferation Differentation; Immuno response	4.38807e-08	-0.511666	1	1	3.11114e-05	seurat_psf_3
6; T-cell-receptor-signaling-pathway	T_cell_receptor_signaling_pathway	TNF	Proliferation Differentation; Immuno response	4.55788e-08	-0.510376	1	1	3.23154e-05	seurat_psf_3
7; T-cell-receptor-signaling-pathway	T_cell_receptor_signaling_pathway	CSF2	Proliferation Differentation; Immuno response	4.55788e-08	-0.510376	1	1	3.23154e-05	seurat_psf_3
8; T-cell-receptor-signaling-pathway	T_cell_receptor_signaling_pathway	IFNG	Proliferation Differentation; Immuno response	4.55788e-08	-0.510376	1	1	3.23154e-05	seurat_psf_3
9; T-cell-receptor-signaling-pathway	T_cell_receptor_signaling_pathway	IL10	Proliferation Differentation; Immuno response	4.55788e-08	-0.510376	1	1	3.23154e-05	seurat_psf_3
65; ErbB-signaling-pathway	ErbB_signaling_pathway	MYC	DNA; Adhesion	1.95582e-07	-0.75276	1	1	0.000138667	seurat_psf_3
12; T-cell-receptor-signaling-pathway	T_cell_receptor_signaling_pathway	IL2	Proliferation Differentation; Immuno response	3.17374e-07	-0.531454	1	1	0.000225018	seurat_psf_3
6; Fc-epsilon-RI-signaling-pathway	Fc_epsilon_RI_signaling_pathway	C00696	Generation of eicosanoids	3.31087e-07	-0.710589	1	1	0.000234741	seurat_psf_3
7; Fc-epsilon-RI-signaling-pathway	Fc_epsilon_RI_signaling_pathway	C05952	Generation of eicosanoids	3.31087e-07	-0.710589	1	1	0.000234741	seurat_psf_3
8; Fc-epsilon-RI-signaling-pathway	Fc_epsilon_RI_signaling_pathway	C05951	Generation of eicosanoids	3.31087e-07	-0.710589	1	1	0.000234741	seurat_psf_3
9; Fc-epsilon-RI-signaling-pathway	Fc_epsilon_RI_signaling_pathway	C02166	Generation of eicosanoids	3.31087e-07	-0.710589	1	1	0.000234741	seurat_psf_3
48; Rap1-signaling-pathway	Rap1_signaling_pathway	PARD3	Cell adhesion,migration,polarity	1.1028e-06	-0.511085	1	1	0.000781882	seurat_psf_3
9; Insulin-signaling-pathway	Insulin_signaling_pathway	ELK1	DNA; Proliferation differentiation	1.16466e-06	-0.607705	1	1	0.000825745	seurat_psf_3
33; C-type-lectin-receptor-signaling-pathway	C_type_lectin_receptor_signaling_pathway	IL1B	Th1 Th17 cell differentiation	5.13871e-05	-0.518122	1	1	0.0364335	seurat_psf_3
41; PPAR-signaling-pathway	PPAR_signaling_pathway	LPL	Fatty acid transport; Lipid metabolism	2.5354e-135	0.968967	1	1	1.7976e-132	seurat_psf_4
144; cGMP-PKG-signaling-pathway	cGMP_PKG_signaling_pathway	PDE2A		2.36034e-111	0.561337	1	1	1.67348e-108	seurat_psf_4
68; PPAR-signaling-pathway	PPAR_signaling_pathway	APOC3	Ketogenesis; Lipid metabolism	7.18505e-108	0.633819	1	1	5.0942e-105	seurat_psf_4
44; PPAR-signaling-pathway	PPAR_signaling_pathway	CYP7A1	Cholesterol metabolism; Lipid metabilism	8.92059e-108	0.622745	1	1	6.3247e-105	seurat_psf_4
55; PPAR-signaling-pathway	PPAR_signaling_pathway	FABP1	Fatty acid transport; Lipid metabolism	8.92059e-108	0.622745	1	1	6.3247e-105	seurat_psf_4
69; PPAR-signaling-pathway	PPAR_signaling_pathway	CYP8B1	Cholesterol metabolism; Lipid metabilism	8.92059e-108	0.622745	1	1	6.3247e-105	seurat_psf_4
75; PPAR-signaling-pathway	PPAR_signaling_pathway	APOA5	Ketogenesis; Lipid metabolism	8.92059e-108	0.622745	1	1	6.3247e-105	seurat_psf_4
36; PPAR-signaling-pathway	PPAR_signaling_pathway	EHHADH	Fatty acid oxidation; Lipit metabolism	3.15349e-102	0.632979	1	1	2.23583e-99	seurat_psf_4
72; PPAR-signaling-pathway	PPAR_signaling_pathway	APOA1	Ketogenesis; Lipid metabolism	2.57184e-100	0.619304	1	1	1.82343e-97	seurat_psf_4
57; PPAR-signaling-pathway	PPAR_signaling_pathway	APOA2	Ketogenesis; Lipid metabolism	9.35414e-98	0.606037	1	1	6.63208e-95	seurat_psf_4
37; PPAR-signaling-pathway	PPAR_signaling_pathway	CPT2	Fatty acid oxidation; Lipit metabolism	5.20865e-95	0.614455	1	1	3.69294e-92	seurat_psf_4
32; PPAR-signaling-pathway	PPAR_signaling_pathway	ACAA1	Fatty acid oxidation; Lipit metabolism	3.49586e-91	0.602849	1	1	2.47857e-88	seurat_psf_4
13; MAPK-signaling-pathway	MAPK_signaling_pathway	STMN1		3.93964e-91	-0.600232	1	1	2.79321e-88	seurat_psf_4
52; MAPK-signaling-pathway	MAPK_signaling_pathway	MEF2C	DNA; Proliferation differentiation, inflammation	1.49466e-81	-0.738418	1	1	1.05971e-78	seurat_psf_4
56; C-type-lectin-receptor-signaling-pathway	C_type_lectin_receptor_signaling_pathway	IL6	Th2 cell differentiation	1.00344e-79	0.715524	1	1	7.11442e-77	seurat_psf_4
55; C-type-lectin-receptor-signaling-pathway	C_type_lectin_receptor_signaling_pathway	IL10	Th2 cell differentiation	3.10487e-79	-0.812995	1	1	2.20136e-76	seurat_psf_4
161; C-type-lectin-receptor-signaling-pathway	C_type_lectin_receptor_signaling_pathway	CCL17	Th2 cell differentiation	3.2288e-79	-0.825304	1	1	2.28922e-76	seurat_psf_4
160; C-type-lectin-receptor-signaling-pathway	C_type_lectin_receptor_signaling_pathway	CCL22	Th2 cell differentiation	4.8376e-79	-0.818304	1	1	3.42986e-76	seurat_psf_4
22; C-type-lectin-receptor-signaling-pathway	C_type_lectin_receptor_signaling_pathway	IL23A	Th2 cell differentiation	6.95804e-78	0.705451	1	1	4.93325e-75	seurat_psf_4
31; PPAR-signaling-pathway	PPAR_signaling_pathway	SCP2	Fatty acid oxidation; Lipit metabolism	2.85598e-72	0.60382	1	1	2.02489e-69	seurat_psf_4
57; C-type-lectin-receptor-signaling-pathway	C_type_lectin_receptor_signaling_pathway	IL12A	Th2 cell differentiation	3.26934e-71	0.637955	1	1	2.31796e-68	seurat_psf_4
123; cAMP-signaling-pathway	cAMP_signaling_pathway	PAK1	Cytoskeletal remodelling, acherens junction enhancerment (vascular endothelial cell)	8.12731e-70	-0.55353	1	1	5.76226e-67	seurat_psf_4
76; PPAR-signaling-pathway	PPAR_signaling_pathway	ME3	Lipogenesis;; Lipid metabolism	1.78981e-67	0.580071	1	1	1.26898e-64	seurat_psf_4
46; Insulin-signaling-pathway	Insulin_signaling_pathway	FBP1	Glycolysis;Glucose homeostasis; Glycogenesis	1.11513e-65	0.583611	1	1	7.90629e-63	seurat_psf_4
164; C-type-lectin-receptor-signaling-pathway	C_type_lectin_receptor_signaling_pathway	EGR2	Th1 Th17 cell differentiation	8.7021e-63	0.615157	1	1	6.16979e-60	seurat_psf_4
30; Rap1-signaling-pathway	Rap1_signaling_pathway	ITGAL	Cell adhesion,migration,polarity	4.0013e-61	0.6433	1	1	2.83692e-58	seurat_psf_4
38; Fc-gamma-R-mediated-phagocytosis	Fc_gamma_R_mediated_phagocytosis	CFL1	Phagocytosis; Membrane traficking; Particle internalization; Phagosome closure; Phagosome-lysosome fusion	4.79169e-58	0.759204	1	1	3.39731e-55	seurat_psf_4
33; PPAR-signaling-pathway	PPAR_signaling_pathway	ACADM	Fatty acid oxidation; Lipit metabolism	1.11437e-57	0.536419	1	1	7.90088e-55	seurat_psf_4
58; PPAR-signaling-pathway	PPAR_signaling_pathway	PLTP	Ketogenesis; Lipid metabolism	2.76187e-57	0.52897	1	1	1.95816e-54	seurat_psf_4
96; Rap1-signaling-pathway	Rap1_signaling_pathway	PLCE1	Proliferation survival gene activation	3.02225e-55	0.543179	1	1	2.14277e-52	seurat_psf_4
17; Rap1-signaling-pathway	Rap1_signaling_pathway	ACTB	Cell adhesion,migration,polarity	2.46151e-53	0.647972	1	1	1.74521e-50	seurat_psf_4
82; Rap1-signaling-pathway	Rap1_signaling_pathway	ITGA2B	Cell adhesion,migration,polarity	1.72128e-46	0.720878	1	1	1.22039e-43	seurat_psf_4
3; Rap1-signaling-pathway	Rap1_signaling_pathway	MAPK1	Proliferation survival gene activation	1.77126e-41	0.50338	1	1	1.25582e-38	seurat_psf_4
15; AMPK-signaling-pathway	AMPK_signaling_pathway	FOXO1	Activated mitochondrial biogeneses	8.54151e-40	0.677221	1	1	6.05593e-37	seurat_psf_4
48; Rap1-signaling-pathway	Rap1_signaling_pathway	PARD3	Cell adhesion,migration,polarity	2.83136e-38	0.757901	1	1	2.00744e-35	seurat_psf_4
95; Rap1-signaling-pathway	Rap1_signaling_pathway	THBS1	Defective angiogensis	1.03406e-36	0.611438	1	1	7.33151e-34	seurat_psf_4
67; Rap1-signaling-pathway	Rap1_signaling_pathway	AKT3	Proliferation survival gene activation	2.69464e-36	0.573343	1	1	1.9105e-33	seurat_psf_4
40; TNF-signaling-pathway	TNF_signaling_pathway	JUN		2.79933e-36	-0.676744	1	1	1.98472e-33	seurat_psf_4
18; Rap1-signaling-pathway	Rap1_signaling_pathway	CDH1	Cell adhesion,migration,polarity	3.70326e-30	0.552116	1	1	2.62561e-27	seurat_psf_4
78; Hippo-signaling-pathway	Hippo_signaling_pathway	SOX2	Anti-apoptotic genes; Pro-proliferation genes	5.99646e-13	-0.758219	1	1	4.25149e-10	seurat_psf_4
168; C-type-lectin-receptor-signaling-pathway	C_type_lectin_receptor_signaling_pathway	IL12A	Th1 Th17 cell differentiation	8.84305e-13	-0.716443	1	1	6.26973e-10	seurat_psf_4
77; Hippo-signaling-pathway	Hippo_signaling_pathway	CCND1	Anti-apoptotic genes; Pro-proliferation genes	4.98686e-09	-0.518117	1	1	3.53568e-06	seurat_psf_4
12; Hippo-signaling-pathway	Hippo_signaling_pathway	CTGF	Anti-apoptotic genes; Pro-proliferation genes	1.69163e-07	-0.551225	1	1	0.000119937	seurat_psf_4
75; Hippo-signaling-pathway	Hippo_signaling_pathway	NKD1	Anti-apoptotic genes; Pro-proliferation genes	9.31868e-07	-0.500036	1	1	0.000660695	seurat_psf_4
74; Hippo-signaling-pathway	Hippo_signaling_pathway	AXIN1	Anti-apoptotic genes; Pro-proliferation genes	4.28637e-05	-0.585367	1	1	0.0303904	seurat_psf_4
109; Chemokine-signaling-pathway	Chemokine_signaling_pathway	MAPK1	DNA; Cytokine production; Cellular gowth and differentiation; Cell survival; Migration; Apoptosis	1.09002e-73	3.19148	1	1	7.72827e-71	seurat_psf_5
73; PI3K-Akt-signaling-pathway	PI3K_Akt_signaling_pathway	MAPK1	Cell proliferation Angiogenesis DNA repair	4.82349e-69	2.28648	1	1	3.41985e-66	seurat_psf_5
26; T-cell-receptor-signaling-pathway	T_cell_receptor_signaling_pathway	GRB2	?	2.32925e-68	0.965933	1	1	1.65144e-65	seurat_psf_5
9; Insulin-signaling-pathway	Insulin_signaling_pathway	ELK1	DNA; Proliferation differentiation	2.56327e-67	3.03615	1	1	1.81736e-64	seurat_psf_5
6; Fc-epsilon-RI-signaling-pathway	Fc_epsilon_RI_signaling_pathway	C00696	Generation of eicosanoids	3.60147e-67	3.06148	1	1	2.55344e-64	seurat_psf_5
7; Fc-epsilon-RI-signaling-pathway	Fc_epsilon_RI_signaling_pathway	C05952	Generation of eicosanoids	3.60147e-67	3.06148	1	1	2.55344e-64	seurat_psf_5
8; Fc-epsilon-RI-signaling-pathway	Fc_epsilon_RI_signaling_pathway	C05951	Generation of eicosanoids	3.60147e-67	3.06148	1	1	2.55344e-64	seurat_psf_5
9; Fc-epsilon-RI-signaling-pathway	Fc_epsilon_RI_signaling_pathway	C02166	Generation of eicosanoids	3.60147e-67	3.06148	1	1	2.55344e-64	seurat_psf_5
32; Insulin-signaling-pathway	Insulin_signaling_pathway	EIF4E	Protein synthesis	8.45716e-67	2.87469	1	1	5.99613e-64	seurat_psf_5
125; Endocrine-resistance	Endocrine_resistance	JUN	DNA; Transcription Proliferation	1.15745e-66	3.18356	1	1	8.20633e-64	seurat_psf_5
65; ErbB-signaling-pathway	ErbB_signaling_pathway	MYC	DNA; Adhesion	3.43726e-66	3.13312	1	1	2.43702e-63	seurat_psf_5
5; T-cell-receptor-signaling-pathway	T_cell_receptor_signaling_pathway	CDK4	Proliferation Differentation; Immuno response	6.29576e-65	2.72775	1	1	4.46369e-62	seurat_psf_5
6; T-cell-receptor-signaling-pathway	T_cell_receptor_signaling_pathway	TNF	Proliferation Differentation; Immuno response	1.13527e-64	2.24892	1	1	8.04903e-62	seurat_psf_5
7; T-cell-receptor-signaling-pathway	T_cell_receptor_signaling_pathway	CSF2	Proliferation Differentation; Immuno response	1.13527e-64	2.24892	1	1	8.04903e-62	seurat_psf_5
8; T-cell-receptor-signaling-pathway	T_cell_receptor_signaling_pathway	IFNG	Proliferation Differentation; Immuno response	1.13527e-64	2.24892	1	1	8.04903e-62	seurat_psf_5
9; T-cell-receptor-signaling-pathway	T_cell_receptor_signaling_pathway	IL10	Proliferation Differentation; Immuno response	1.13527e-64	2.24892	1	1	8.04903e-62	seurat_psf_5
11; T-cell-receptor-signaling-pathway	T_cell_receptor_signaling_pathway	IL4	Proliferation Differentation; Immuno response	1.52692e-64	2.24341	1	1	1.08258e-61	seurat_psf_5
10; T-cell-receptor-signaling-pathway	T_cell_receptor_signaling_pathway	IL5	Proliferation Differentation; Immuno response	1.8921e-64	2.23677	1	1	1.3415e-61	seurat_psf_5
126; Endocrine-resistance	Endocrine_resistance	FOS	DNA; Transcription Proliferation	3.57487e-64	2.70456	1	1	2.53458e-61	seurat_psf_5
12; T-cell-receptor-signaling-pathway	T_cell_receptor_signaling_pathway	IL2	Proliferation Differentation; Immuno response	5.22034e-64	2.29489	1	1	3.70122e-61	seurat_psf_5
42; Ras-signaling-pathway	Ras_signaling_pathway	PLA2G4B	Gene expression	2.26381e-63	1.63868	1	1	1.60504e-60	seurat_psf_5
100; PI3K-Akt-signaling-pathway	PI3K_Akt_signaling_pathway	PRKCA	Cglucose uptake; Vesicle transpory	4.12691e-63	1.49994	1	1	2.92598e-60	seurat_psf_5
12; MAPK-signaling-pathway	MAPK_signaling_pathway	PLA2G4B		3.97496e-62	1.06984	1	1	2.81825e-59	seurat_psf_5
94; cGMP-PKG-signaling-pathway	cGMP_PKG_signaling_pathway	MAPK1	Platelet activation	5.41803e-61	1.68847	1	1	3.84139e-58	seurat_psf_5
3; ErbB-signaling-pathway	ErbB_signaling_pathway	ELK1	DNA; Migration/ Invasion	5.54862e-61	3.21561	1	1	3.93397e-58	seurat_psf_5
24; B-cell-receptor-signaling-pathway	B_cell_receptor_signaling_pathway	FOS	DNA; B cell ontogeny; Autoimmunity; Anergy; Immuno response Ig production GC formation	5.3118e-60	2.3249	1	1	3.76607e-57	seurat_psf_5
36; TNF-signaling-pathway	TNF_signaling_pathway	CREB3		1.61449e-59	2.59384	1	1	1.14467e-56	seurat_psf_5
121; MAPK-signaling-pathway	MAPK_signaling_pathway	MYC		2.60345e-59	1.0626	1	1	1.84585e-56	seurat_psf_5
30; Fc-epsilon-RI-signaling-pathway	Fc_epsilon_RI_signaling_pathway	PRKCA	DNA; Cytokine gene transcription	1.08395e-58	1.63238	1	1	7.68524e-56	seurat_psf_5
43; Ras-signaling-pathway	Ras_signaling_pathway	ELK1	Gene expression	3.27902e-58	1.84009	1	1	2.32482e-55	seurat_psf_5
58; Fc-gamma-R-mediated-phagocytosis	Fc_gamma_R_mediated_phagocytosis	C00219	Phagocytosis; Membrane remodeling; Focal exocytosis; Pseudopod extention; Particle internalization	3.22598e-57	1.59471	1	1	2.28722e-54	seurat_psf_5
3; Rap1-signaling-pathway	Rap1_signaling_pathway	MAPK1	Proliferation survival gene activation	1.4804e-55	1.81341	1	1	1.0496e-52	seurat_psf_5
124; MAPK-signaling-pathway	MAPK_signaling_pathway	ATF4	DNA; Proliferation differentiation	6.84779e-55	1.41349	1	1	4.85509e-52	seurat_psf_5
89; HIF-1-signaling-pathway	HIF_1_signaling_pathway	CDKN1A	Reduce oxygen consumption; Regulate proliferation and apoptosis	1.09391e-53	1.45947	1	1	7.7558e-51	seurat_psf_5
44; Ras-signaling-pathway	Ras_signaling_pathway	ETS1	Gene expression	2.75439e-52	1.38764	1	1	1.95286e-49	seurat_psf_5
13; MAPK-signaling-pathway	MAPK_signaling_pathway	STMN1		2.52193e-50	1.07476	1	1	1.78805e-47	seurat_psf_5
75; Chemokine-signaling-pathway	Chemokine_signaling_pathway	WAS		9.0904e-50	1.13315	1	1	6.44509e-47	seurat_psf_5
121; Chemokine-signaling-pathway	Chemokine_signaling_pathway	NFKB1	DNA; Cytokine production; Cellular gowth and differentiation; Cell survival; Migration; Apoptosis	1.20561e-49	1.23907	1	1	8.54776e-47	seurat_psf_5
56; mTOR-signaling-pathway	mTOR_signaling_pathway	EIF4B	Cap-dependent translocation; Protein systhesis	3.94798e-49	2.13728	1	1	2.79912e-46	seurat_psf_5
87; Wnt-signaling-pathway	Wnt_signaling_pathway	WISP1		4.65686e-49	1.16187	1	1	3.30172e-46	seurat_psf_5
30; JAK-STAT-signaling-pathway	JAK_STAT_signaling_pathway	CDKN1A	Cell-cycle inhibition	1.56797e-47	1.11858	1	1	1.11169e-44	seurat_psf_5
49; Wnt-signaling-pathway	Wnt_signaling_pathway	RBX1	Proteolysis	2.14925e-47	1.68799	1	1	1.52382e-44	seurat_psf_5
16; Wnt-signaling-pathway	Wnt_signaling_pathway	CAMK2A	DNA	2.36554e-47	0.73722	1	1	1.67716e-44	seurat_psf_5
119; Apoptosis	Apoptosis	BCL2	Pro-survival genes	5.35334e-46	1.14474	1	1	3.79552e-43	seurat_psf_5
27; Ras-signaling-pathway	Ras_signaling_pathway	ABL1	Cytoskeletal remodelling	5.6849e-46	1.12333	1	1	4.03059e-43	seurat_psf_5
80; Hippo-signaling-pathway	Hippo_signaling_pathway	BIRC2	Anti-apoptotic genes; Pro-proliferation genes	6.86582e-46	2.05249	1	1	4.86787e-43	seurat_psf_5
52; Fc-gamma-R-mediated-phagocytosis	Fc_gamma_R_mediated_phagocytosis	AMPH	Phagocytosis; Membrane remodeling; Focal exocytosis; Pseudopod extention; Particle internalization	2.07635e-45	1.16468	1	1	1.47213e-42	seurat_psf_5
46; HIF-1-signaling-pathway	HIF_1_signaling_pathway	ENO1	Reduce oxygen consumption; Promote anaerobic metabolism	6.57872e-45	0.973509	1	1	4.66431e-42	seurat_psf_5
15; MAPK-signaling-pathway	MAPK_signaling_pathway	NFKB1	Proliferation inflammation anti-apoptosis	6.852e-45	1.1095	1	1	4.85807e-42	seurat_psf_5
76; Hippo-signaling-pathway	Hippo_signaling_pathway	MYC	Anti-apoptotic genes; Pro-proliferation genes	8.38321e-45	1.87702	1	1	5.94369e-42	seurat_psf_5
14; Chemokine-signaling-pathway	Chemokine_signaling_pathway	PXN		3.72055e-44	0.937423	1	1	2.63787e-41	seurat_psf_5
97; Ras-signaling-pathway	Ras_signaling_pathway	PAK4...	Cytoskeleton organization; Cell motolity	7.17203e-44	0.992172	1	1	5.08497e-41	seurat_psf_5
79; Hippo-signaling-pathway	Hippo_signaling_pathway	SNAI2	Anti-apoptotic genes; Pro-proliferation genes	1.2049e-43	1.85313	1	1	8.54276e-41	seurat_psf_5
74; Hippo-signaling-pathway	Hippo_signaling_pathway	AXIN1	Anti-apoptotic genes; Pro-proliferation genes	1.26262e-43	2.30426	1	1	8.95198e-41	seurat_psf_5
47; Chemokine-signaling-pathway	Chemokine_signaling_pathway	CRK		3.16352e-43	0.881215	1	1	2.24294e-40	seurat_psf_5
16; mTOR-signaling-pathway	mTOR_signaling_pathway	LPIN1	Lipid biosynthesis	3.05147e-42	1.73173	1	1	2.16349e-39	seurat_psf_5
14; Wnt-signaling-pathway	Wnt_signaling_pathway	PRKCA	DNA	3.20565e-42	0.674501	1	1	2.2728e-39	seurat_psf_5
119; MAPK-signaling-pathway	MAPK_signaling_pathway	FOS	DNA; Proliferation differentiation	3.91671e-42	1.18146	1	1	2.77694e-39	seurat_psf_5
111; cGMP-PKG-signaling-pathway	cGMP_PKG_signaling_pathway	GTF2I	Transcription	2.74226e-41	0.709754	1	1	1.94426e-38	seurat_psf_5
91; Chemokine-signaling-pathway	Chemokine_signaling_pathway	PRKACA		6.68507e-41	-0.519677	1	1	4.73971e-38	seurat_psf_5
31; Wnt-signaling-pathway	Wnt_signaling_pathway	MMP7		7.28281e-41	0.811645	1	1	5.16351e-38	seurat_psf_5
34; Wnt-signaling-pathway	Wnt_signaling_pathway	FOSL1		7.28281e-41	0.811645	1	1	5.16351e-38	seurat_psf_5
33; mTOR-signaling-pathway	mTOR_signaling_pathway	RPS6	Ribosome biogenesis; Protein systhesis	8.99816e-41	1.70038	1	1	6.3797e-38	seurat_psf_5
18; Rap1-signaling-pathway	Rap1_signaling_pathway	CDH1	Cell adhesion,migration,polarity	1.78411e-40	1.39128	1	1	1.26493e-37	seurat_psf_5
28; Calcium-signaling-pathway	Calcium_signaling_pathway	PTK2B	Other signaling pathways	2.58952e-40	0.592524	1	1	1.83597e-37	seurat_psf_5
44; HIF-1-signaling-pathway	HIF_1_signaling_pathway	GAPDH	Reduce oxygen consumption; Promote anaerobic metabolism	2.70413e-40	0.913299	1	1	1.91723e-37	seurat_psf_5
35; Wnt-signaling-pathway	Wnt_signaling_pathway	JUN		4.07505e-40	1.18219	1	1	2.88921e-37	seurat_psf_5
108; Chemokine-signaling-pathway	Chemokine_signaling_pathway	STAT1	DNA; Cytokine production; Cellular gowth and differentiation; Cell survival Migration; Apoptosis	4.08158e-40	0.549805	1	1	2.89384e-37	seurat_psf_5
78; Hippo-signaling-pathway	Hippo_signaling_pathway	SOX2	Anti-apoptotic genes; Pro-proliferation genes	1.5062e-39	2.6347	1	1	1.06789e-36	seurat_psf_5
63; Ras-signaling-pathway	Ras_signaling_pathway	TIAM1	Effectors	2.0919e-39	0.855199	1	1	1.48315e-36	seurat_psf_5
14; MAPK-signaling-pathway	MAPK_signaling_pathway	MAPT		3.15756e-39	0.862325	1	1	2.23871e-36	seurat_psf_5
75; Hippo-signaling-pathway	Hippo_signaling_pathway	NKD1	Anti-apoptotic genes; Pro-proliferation genes	3.70423e-39	1.77121	1	1	2.6263e-36	seurat_psf_5
53; HIF-1-signaling-pathway	HIF_1_signaling_pathway	EGF	Increase oxygen delivery; Angiogenesis	1.11929e-38	0.858667	1	1	7.93576e-36	seurat_psf_5
49; HIF-1-signaling-pathway	HIF_1_signaling_pathway	EPO	Increase oxygen delivery; Erythropoiesis	1.14416e-38	0.82864	1	1	8.11213e-36	seurat_psf_5
54; HIF-1-signaling-pathway	HIF_1_signaling_pathway	SERPINE1	Increase oxygen delivery; Angiogenesis	1.27904e-38	0.833784	1	1	9.06838e-36	seurat_psf_5
57; HIF-1-signaling-pathway	HIF_1_signaling_pathway	TIMP1	Increase oxygen delivery; Angiogenesis	1.56088e-38	0.840155	1	1	1.10667e-35	seurat_psf_5
63; HIF-1-signaling-pathway	HIF_1_signaling_pathway	TIMP1	Matrix and barrier functions	1.56088e-38	0.840155	1	1	1.10667e-35	seurat_psf_5
59; HIF-1-signaling-pathway	HIF_1_signaling_pathway	NOS2	Increase oxygen delivery; Vascular tone	1.94354e-38	0.821966	1	1	1.37797e-35	seurat_psf_5
31; mTOR-signaling-pathway	mTOR_signaling_pathway	EIF4E	Cap-dependent translocation; Protein systhesis	6.46877e-38	1.94141	1	1	4.58636e-35	seurat_psf_5
23; ErbB-signaling-pathway	ErbB_signaling_pathway	RPS6KB1	Protein synthesis	9.62504e-38	1.56542	1	1	6.82415e-35	seurat_psf_5
12; p53-signaling-pathway	p53_signaling_pathway	CCNE1	G1 arrest( sustaines); Cell cycle arrest	1.07932e-37	-0.62593	1	1	7.65238e-35	seurat_psf_5
55; HIF-1-signaling-pathway	HIF_1_signaling_pathway	ANGPT1	Increase oxygen delivery; Angiogenesis	1.33663e-37	0.82163	1	1	9.47674e-35	seurat_psf_5
61; HIF-1-signaling-pathway	HIF_1_signaling_pathway	HMOX1	Increase oxygen delivery; Vascular tone	2.49078e-37	0.819621	1	1	1.76596e-34	seurat_psf_5
64; HIF-1-signaling-pathway	HIF_1_signaling_pathway	LTBR	Inflammantion	3.4419e-37	0.905236	1	1	2.44031e-34	seurat_psf_5
36; Wnt-signaling-pathway	Wnt_signaling_pathway	MYC		6.31334e-37	0.817522	1	1	4.47615e-34	seurat_psf_5
19; mTOR-signaling-pathway	mTOR_signaling_pathway	PRKCA	Cytoskeletal organization	7.47231e-37	1.37146	1	1	5.29787e-34	seurat_psf_5
58; HIF-1-signaling-pathway	HIF_1_signaling_pathway	EDN1	Increase oxygen delivery; Vascular tone	9.44363e-37	0.846946	1	1	6.69553e-34	seurat_psf_5
48; Rap1-signaling-pathway	Rap1_signaling_pathway	PARD3	Cell adhesion,migration,polarity	1.14665e-36	1.64296	1	1	8.12978e-34	seurat_psf_5
62; mTOR-signaling-pathway	mTOR_signaling_pathway	TTI1		1.40262e-36	1.5764	1	1	9.94455e-34	seurat_psf_5
53; mTOR-signaling-pathway	mTOR_signaling_pathway	GRB10	Lipolysis	1.50226e-36	1.57099	1	1	1.0651e-33	seurat_psf_5
13; VEGF-signaling-pathway	VEGF_signaling_pathway	C01312	PGI2production	4.66706e-36	1.23675	1	1	3.30894e-33	seurat_psf_5
77; Hippo-signaling-pathway	Hippo_signaling_pathway	CCND1	Anti-apoptotic genes; Pro-proliferation genes	5.14182e-36	1.71386	1	1	3.64555e-33	seurat_psf_5
62; HIF-1-signaling-pathway	HIF_1_signaling_pathway	NPPA	Increase oxygen delivery; Vascular tone	5.18087e-36	0.805689	1	1	3.67323e-33	seurat_psf_5
81; mTOR-signaling-pathway	mTOR_signaling_pathway	CLIP1	Microtubule organization	6.08173e-36	1.87823	1	1	4.31195e-33	seurat_psf_5
45; HIF-1-signaling-pathway	HIF_1_signaling_pathway	ALDOA	Reduce oxygen consumption; Promote anaerobic metabolism	1.79929e-35	0.853063	1	1	1.2757e-32	seurat_psf_5
13; Wnt-signaling-pathway	Wnt_signaling_pathway	NFATC1	DNA	3.45778e-35	0.623381	1	1	2.45156e-32	seurat_psf_5
100; Ras-signaling-pathway	Ras_signaling_pathway	REL	Gene expression	6.14222e-35	1.23766	1	1	4.35483e-32	seurat_psf_5
24; Ras-signaling-pathway	Ras_signaling_pathway	PLD1	Endocytosis	7.89892e-35	0.840431	1	1	5.60033e-32	seurat_psf_5
43; FoxO-signaling-pathway	FoxO_signaling_pathway	CDKN1A	Cell cycle regulation	9.23316e-35	0.769548	1	1	6.54631e-32	seurat_psf_5
60; HIF-1-signaling-pathway	HIF_1_signaling_pathway	NOS3	Increase oxygen delivery; Vascular tone	1.22596e-34	0.857506	1	1	8.69203e-32	seurat_psf_5
139; Chemokine-signaling-pathway	Chemokine_signaling_pathway	GSK3A...		1.51309e-34	-0.553918	1	1	1.07278e-31	seurat_psf_5
42; HIF-1-signaling-pathway	HIF_1_signaling_pathway	HK1	Reduce oxygen consumption; Promote anaerobic metabolism	3.24748e-34	0.739946	1	1	2.30246e-31	seurat_psf_5
35; Ras-signaling-pathway	Ras_signaling_pathway	NFKB1	Cell survival; Cell growth; Cell migration; Cell cycle progression; Transcription	1.71597e-33	0.772559	1	1	1.21662e-30	seurat_psf_5
32; mTOR-signaling-pathway	mTOR_signaling_pathway	ULK1	Autophagy	2.05262e-33	-0.783151	1	1	1.4553e-30	seurat_psf_5
88; HIF-1-signaling-pathway	HIF_1_signaling_pathway	BCL2	Reduce oxygen consumption; Regulate proliferation and apoptosis	2.20111e-33	0.791385	1	1	1.56059e-30	seurat_psf_5
51; RIG-I-like-receptor-signaling-pathway	RIG_I_like_receptor_signaling_pathway	CXCL8	Inflammatory cytokines; Protein synthesis; Growth arrest; Dendrition cell activation; NK cell activation; Antibody production; Apoptosis	3.51353e-33	1.05671	1	1	2.49109e-30	seurat_psf_5
52; RIG-I-like-receptor-signaling-pathway	RIG_I_like_receptor_signaling_pathway	TNF	Inflammatory cytokines; Protein synthesis; Growth arrest; Dendrition cell activation; NK cell activation; Antibody production; Apoptosis	3.51353e-33	1.05671	1	1	2.49109e-30	seurat_psf_5
54; RIG-I-like-receptor-signaling-pathway	RIG_I_like_receptor_signaling_pathway	CXCL10	Inflammatory cytokines; Protein synthesis; Growth arrest; Dendrition cell activation; NK cell activation; Antibody production; Apoptosis	6.21455e-33	1.04123	1	1	4.40612e-30	seurat_psf_5
32; Wnt-signaling-pathway	Wnt_signaling_pathway	PPARD		1.20605e-32	0.896454	1	1	8.55088e-30	seurat_psf_5
53; RIG-I-like-receptor-signaling-pathway	RIG_I_like_receptor_signaling_pathway	IL12A	Inflammatory cytokines; Protein synthesis; Growth arrest; Dendrition cell activation; NK cell activation; Antibody production; Apoptosis	2.20654e-32	1.03966	1	1	1.56444e-29	seurat_psf_5
56; HIF-1-signaling-pathway	HIF_1_signaling_pathway	TEK	Increase oxygen delivery; Angiogenesis	2.48146e-32	0.822122	1	1	1.75936e-29	seurat_psf_5
48; HIF-1-signaling-pathway	HIF_1_signaling_pathway	PFKFB3	Reduce oxygen consumption; Promote anaerobic metabolism	2.59399e-32	0.912781	1	1	1.83914e-29	seurat_psf_5
58; p53-signaling-pathway	p53_signaling_pathway	CASP3	Apoptosis	2.88761e-32	1.03083	1	1	2.04732e-29	seurat_psf_5
82; Rap1-signaling-pathway	Rap1_signaling_pathway	ITGA2B	Cell adhesion,migration,polarity	3.20049e-32	0.960728	1	1	2.26915e-29	seurat_psf_5
105; cGMP-PKG-signaling-pathway	cGMP_PKG_signaling_pathway	SLC8A2		1.33682e-31	0.579844	1	1	9.47807e-29	seurat_psf_5
171; NOD-like-receptor-signaling-pathway	NOD_like_receptor_signaling_pathway	TNF	Pro-inflammatory cytokines	1.77319e-31	0.887196	1	1	1.25719e-28	seurat_psf_5
172; NOD-like-receptor-signaling-pathway	NOD_like_receptor_signaling_pathway	CXCL8	Chemokines	1.77319e-31	0.887196	1	1	1.25719e-28	seurat_psf_5
173; NOD-like-receptor-signaling-pathway	NOD_like_receptor_signaling_pathway	CXCL1	Chemokines	1.77319e-31	0.887196	1	1	1.25719e-28	seurat_psf_5
170; NOD-like-receptor-signaling-pathway	NOD_like_receptor_signaling_pathway	IL6	Pro-inflammatory cytokines	2.54705e-31	0.88176	1	1	1.80586e-28	seurat_psf_5
23; p53-signaling-pathway	p53_signaling_pathway	PTEN	Inhibition of IGF-1/mTOR pathway	4.652e-31	0.669968	1	1	3.29826e-28	seurat_psf_5
174; NOD-like-receptor-signaling-pathway	NOD_like_receptor_signaling_pathway	CCL2	Chemokines	4.7511e-31	0.874305	1	1	3.36853e-28	seurat_psf_5
183; NOD-like-receptor-signaling-pathway	NOD_like_receptor_signaling_pathway	CAMP	Antimicrobial peptides; Defensins	6.00228e-31	0.861286	1	1	4.25562e-28	seurat_psf_5
178; NOD-like-receptor-signaling-pathway	NOD_like_receptor_signaling_pathway	IL1B	Pro-inflammatory cytokines	8.17334e-31	0.869193	1	1	5.7949e-28	seurat_psf_5
26; Ras-signaling-pathway	Ras_signaling_pathway	PRKCA		1.23112e-30	0.624939	1	1	8.72867e-28	seurat_psf_5
99; PI3K-Akt-signaling-pathway	PI3K_Akt_signaling_pathway	MYB	Cell survival	2.36368e-30	0.625172	1	1	1.67585e-27	seurat_psf_5
4; NF-kappa-B-signaling-pathway	NF_kappa_B_signaling_pathway	BIRC2	Survival	2.5826e-30	1.39696	1	1	1.83106e-27	seurat_psf_5
44; T-cell-receptor-signaling-pathway	T_cell_receptor_signaling_pathway	PAK4...		9.5258e-30	0.586549	1	1	6.75379e-27	seurat_psf_5
175; NOD-like-receptor-signaling-pathway	NOD_like_receptor_signaling_pathway	CCL5	Chemokines	1.68912e-29	0.89777	1	1	1.19759e-26	seurat_psf_5
113; NF-kappa-B-signaling-pathway	NF_kappa_B_signaling_pathway	CFLAR	Survival	4.24499e-29	1.36068	1	1	3.00969e-26	seurat_psf_5
142; NF-kappa-B-signaling-pathway	NF_kappa_B_signaling_pathway	NFKB2	Activation of noncanonical pathway	4.84717e-29	1.48809	1	1	3.43664e-26	seurat_psf_5
51; NF-kappa-B-signaling-pathway	NF_kappa_B_signaling_pathway	TNFAIP3	Negative feedback	6.78582e-29	1.23166	1	1	4.81115e-26	seurat_psf_5
52; NF-kappa-B-signaling-pathway	NF_kappa_B_signaling_pathway	TRAF1	Survival	8.363e-29	1.23409	1	1	5.92937e-26	seurat_psf_5
67; Rap1-signaling-pathway	Rap1_signaling_pathway	AKT3	Proliferation survival gene activation	9.36456e-29	0.870833	1	1	6.63947e-26	seurat_psf_5
53; NF-kappa-B-signaling-pathway	NF_kappa_B_signaling_pathway	CXCL8	Survival	1.09754e-28	1.19539	1	1	7.78153e-26	seurat_psf_5
115; NF-kappa-B-signaling-pathway	NF_kappa_B_signaling_pathway	XIAP	Survival	1.09754e-28	1.19539	1	1	7.78153e-26	seurat_psf_5
130; NF-kappa-B-signaling-pathway	NF_kappa_B_signaling_pathway	TNF	Positive feedback	1.09754e-28	1.19539	1	1	7.78153e-26	seurat_psf_5
133; NF-kappa-B-signaling-pathway	NF_kappa_B_signaling_pathway	CXCL2	Inflammation	1.09754e-28	1.19539	1	1	7.78153e-26	seurat_psf_5
131; NF-kappa-B-signaling-pathway	NF_kappa_B_signaling_pathway	CCL4L1	Inflammation	1.78144e-28	1.18518	1	1	1.26304e-25	seurat_psf_5
114; NF-kappa-B-signaling-pathway	NF_kappa_B_signaling_pathway	BCL2A1	Survival	2.12846e-28	1.19623	1	1	1.50908e-25	seurat_psf_5
128; NF-kappa-B-signaling-pathway	NF_kappa_B_signaling_pathway	IL1B	Positive feedback	2.76181e-28	1.17908	1	1	1.95812e-25	seurat_psf_5
33; JAK-STAT-signaling-pathway	JAK_STAT_signaling_pathway	RAF1	Proliferation Differentation	3.78766e-28	1.32764	1	1	2.68545e-25	seurat_psf_5
22; ErbB-signaling-pathway	ErbB_signaling_pathway	EIF4EBP1	Protein synthesis	4.20744e-28	-0.713368	1	1	2.98308e-25	seurat_psf_5
182; NOD-like-receptor-signaling-pathway	NOD_like_receptor_signaling_pathway	C16054...		5.15944e-28	0.837272	1	1	3.65804e-25	seurat_psf_5
57; ErbB-signaling-pathway	ErbB_signaling_pathway	ABL1		5.23592e-28	0.609558	1	1	3.71227e-25	seurat_psf_5
51; HIF-1-signaling-pathway	HIF_1_signaling_pathway	TFRC	Increase oxygen delivery; Iron metabolism	2.00358e-27	0.866885	1	1	1.42054e-24	seurat_psf_5
5; PI3K-Akt-signaling-pathway	PI3K_Akt_signaling_pathway	EIF4B	Protein synthesis	2.17631e-27	0.752892	1	1	1.543e-24	seurat_psf_5
169; NOD-like-receptor-signaling-pathway	NOD_like_receptor_signaling_pathway	IL18	Pro-inflammatory cytokines	2.95731e-27	0.98119	1	1	2.09673e-24	seurat_psf_5
2; NF-kappa-B-signaling-pathway	NF_kappa_B_signaling_pathway	BCL2L1	Survival	3.17381e-27	1.36403	1	1	2.25023e-24	seurat_psf_5
5; HIF-1-signaling-pathway	HIF_1_signaling_pathway	VEGFA	Increase oxygen delivery; Angiogenesis	3.38826e-27	0.820905	1	1	2.40228e-24	seurat_psf_5
53; p53-signaling-pathway	p53_signaling_pathway	CCND1	G1 arrest( sustaines); Cell cycle arrest	4.29349e-27	-0.512508	1	1	3.04408e-24	seurat_psf_5
51; Fc-gamma-R-mediated-phagocytosis	Fc_gamma_R_mediated_phagocytosis	NCF1	NADPH oxidase; Digestion of bacterium; Respiratory burst in phagosome	5.22553e-27	0.611577	1	1	3.7049e-24	seurat_psf_5
55; Ras-signaling-pathway	Ras_signaling_pathway	AFDN	Cell-cell junctions	5.69447e-27	0.585782	1	1	4.03738e-24	seurat_psf_5
129; NF-kappa-B-signaling-pathway	NF_kappa_B_signaling_pathway	PTGS2	Inflammation	6.11693e-27	1.15055	1	1	4.3369e-24	seurat_psf_5
132; NF-kappa-B-signaling-pathway	NF_kappa_B_signaling_pathway	VCAM1	Inflammation	8.27938e-27	1.18795	1	1	5.87008e-24	seurat_psf_5
14; Rap1-signaling-pathway	Rap1_signaling_pathway	MAPK14	Proliferation survival gene activation	8.51912e-27	0.833481	1	1	6.04006e-24	seurat_psf_5
3; NF-kappa-B-signaling-pathway	NF_kappa_B_signaling_pathway	BCL2	Survival	1.34721e-26	1.2131	1	1	9.55174e-24	seurat_psf_5
95; Rap1-signaling-pathway	Rap1_signaling_pathway	THBS1	Defective angiogensis	4.67459e-26	1.02959	1	1	3.31428e-23	seurat_psf_5
24; JAK-STAT-signaling-pathway	JAK_STAT_signaling_pathway	MCL1	Anti-apoptosis	5.61449e-26	0.525884	1	1	3.98068e-23	seurat_psf_5
47; HIF-1-signaling-pathway	HIF_1_signaling_pathway	PGK1	Reduce oxygen consumption; Promote anaerobic metabolism	8.68602e-26	0.641765	1	1	6.15839e-23	seurat_psf_5
17; Rap1-signaling-pathway	Rap1_signaling_pathway	ACTB	Cell adhesion,migration,polarity	1.43e-25	0.965902	1	1	1.01387e-22	seurat_psf_5
54; Ras-signaling-pathway	Ras_signaling_pathway	RHOA	Cytoskeleton organization; Cell motolity	1.88615e-25	0.812038	1	1	1.33728e-22	seurat_psf_5
42; Fc-gamma-R-mediated-phagocytosis	Fc_gamma_R_mediated_phagocytosis	MYO10	Phagocytosis; Membrane remodeling; Focal exocytosis; Pseudopod extention; Particle internalization	2.90944e-25	0.510648	1	1	2.06279e-22	seurat_psf_5
20; Cell-cycle	Cell_cycle	MCM2	DNA; DNA biosynthesis	3.7314e-25	2.01204	1	1	2.64557e-22	seurat_psf_5
161; Chemokine-signaling-pathway	Chemokine_signaling_pathway	BAD		3.95308e-25	-0.550161	1	1	2.80274e-22	seurat_psf_5
18; RIG-I-like-receptor-signaling-pathway	RIG_I_like_receptor_signaling_pathway	IFNA1	Type 1 interfeons; Protein synthesis; Growth arrest; Dendrition cell activation; NK cell activation; Antibody production; Apoptosis	5.23352e-25	0.764717	1	1	3.71057e-22	seurat_psf_5
19; RIG-I-like-receptor-signaling-pathway	RIG_I_like_receptor_signaling_pathway	IFNB1	Type 1 interfeons; Protein synthesis; Growth arrest; Dendrition cell activation; NK cell activation; Antibody production; Apoptosis	5.23352e-25	0.764717	1	1	3.71057e-22	seurat_psf_5
48; RIG-I-like-receptor-signaling-pathway	RIG_I_like_receptor_signaling_pathway	IFNW1	Type 1 interfeons; Protein synthesis; Growth arrest; Dendrition cell activation; NK cell activation; Antibody production; Apoptosis	5.23352e-25	0.764717	1	1	3.71057e-22	seurat_psf_5
49; RIG-I-like-receptor-signaling-pathway	RIG_I_like_receptor_signaling_pathway	IFNE	Type 1 interfeons; Protein synthesis; Growth arrest; Dendrition cell activation; NK cell activation; Antibody production; Apoptosis	5.23352e-25	0.764717	1	1	3.71057e-22	seurat_psf_5
50; RIG-I-like-receptor-signaling-pathway	RIG_I_like_receptor_signaling_pathway	IFNK	Type 1 interfeons; Protein synthesis; Growth arrest; Dendrition cell activation; NK cell activation; Antibody production; Apoptosis	5.23352e-25	0.764717	1	1	3.71057e-22	seurat_psf_5
10; Apoptosis	Apoptosis	BIRC2	Pro-survival genes	5.49514e-25	0.721828	1	1	3.89605e-22	seurat_psf_5
43; HIF-1-signaling-pathway	HIF_1_signaling_pathway	PFKL	Reduce oxygen consumption; Promote anaerobic metabolism	5.59919e-25	0.795605	1	1	3.96983e-22	seurat_psf_5
71; Apoptosis	Apoptosis	GADD45G	Pro-survival genes	6.69433e-25	0.802001	1	1	4.74628e-22	seurat_psf_5
50; NF-kappa-B-signaling-pathway	NF_kappa_B_signaling_pathway	NFKBIA	Negative feedback	7.98145e-25	1.28267	1	1	5.65885e-22	seurat_psf_5
12; Toll-like-receptor-signaling-pathway	Toll_like_receptor_signaling_pathway	NFKB1	Degradation	9.8932e-25	0.863312	1	1	7.01428e-22	seurat_psf_5
69; Apoptosis	Apoptosis	PTPN13	Pro-survival genes	1.32881e-24	0.808104	1	1	9.42124e-22	seurat_psf_5
45; RIG-I-like-receptor-signaling-pathway	RIG_I_like_receptor_signaling_pathway	MAPK14	DNA; Inflammatory cytokines; Protein synthesis; Growth arrest; Dendrition cell activation; NK cell activation; Antibody production; Apoptosis	1.65641e-24	0.561821	1	1	1.17439e-21	seurat_psf_5
116; NF-kappa-B-signaling-pathway	NF_kappa_B_signaling_pathway	GADD45B	Survival	1.95779e-24	1.1739	1	1	1.38808e-21	seurat_psf_5
8; ErbB-signaling-pathway	ErbB_signaling_pathway	STAT5A	DNA;Differentiation	2.21935e-24	0.638517	1	1	1.57352e-21	seurat_psf_5
96; Rap1-signaling-pathway	Rap1_signaling_pathway	PLCE1	Proliferation survival gene activation	2.84873e-24	0.608861	1	1	2.01975e-21	seurat_psf_5
138; Chemokine-signaling-pathway	Chemokine_signaling_pathway	FOXO3	DNA; Cytokine production; Cellular gowth and differentiation; Cell survival; Migration; Apoptosis	8.63295e-24	-0.508331	1	1	6.12076e-21	seurat_psf_5
70; Apoptosis	Apoptosis	CFLAR	Pro-survival genes	1.13661e-23	0.750405	1	1	8.05853e-21	seurat_psf_5
45; Ras-signaling-pathway	Ras_signaling_pathway	RAB5A	Endocytosis	2.89941e-23	0.527978	1	1	2.05568e-20	seurat_psf_5
70; mTOR-signaling-pathway	mTOR_signaling_pathway	TTI1		3.22728e-23	1.03276	1	1	2.28814e-20	seurat_psf_5
72; Apoptosis	Apoptosis	BCL2A1	Pro-survival genes	4.5829e-23	0.627849	1	1	3.24928e-20	seurat_psf_5
29; Toll-like-receptor-signaling-pathway	Toll_like_receptor_signaling_pathway	CXCL8	Chemotactic effects ( Nutrophil, Immature DC )( NK cell )	4.69976e-23	0.577125	1	1	3.33213e-20	seurat_psf_5
46; Toll-like-receptor-signaling-pathway	Toll_like_receptor_signaling_pathway	TNF	Inflammatory cytokines;Proinflammatory effects	4.69976e-23	0.577125	1	1	3.33213e-20	seurat_psf_5
76; Toll-like-receptor-signaling-pathway	Toll_like_receptor_signaling_pathway	CCL3L3	Chemotactic effects ( Nutrophil, Immature DC )( NK cell )	4.69976e-23	0.577125	1	1	3.33213e-20	seurat_psf_5
41; Ras-signaling-pathway	Ras_signaling_pathway	RAC1		5.8932e-23	0.798001	1	1	4.17828e-20	seurat_psf_5
39; Toll-like-receptor-signaling-pathway	Toll_like_receptor_signaling_pathway	IL6	Inflammatory cytokines;Proinflammatory effects	7.96234e-23	0.574235	1	1	5.6453e-20	seurat_psf_5
87; Toll-like-receptor-signaling-pathway	Toll_like_receptor_signaling_pathway	CCL4L1	Chemotactic effects ( Nutrophil, Immature DC )( NK cell )	1.29667e-22	0.568193	1	1	9.1934e-20	seurat_psf_5
54; AMPK-signaling-pathway	AMPK_signaling_pathway	SLC2A4	Activated mitochondrial biogeneses	1.68484e-22	1.07918	1	1	1.19455e-19	seurat_psf_5
73; Apoptosis	Apoptosis	TRAF1	Pro-survival genes	1.9532e-22	0.704569	1	1	1.38482e-19	seurat_psf_5
51; MAPK-signaling-pathway	MAPK_signaling_pathway	ATF4	DNA; Proliferation differentiation, inflammation	3.00709e-22	0.575581	1	1	2.13202e-19	seurat_psf_5
155; Chemokine-signaling-pathway	Chemokine_signaling_pathway	PXN	Migration	3.26891e-22	0.661001	1	1	2.31766e-19	seurat_psf_5
52; HIF-1-signaling-pathway	HIF_1_signaling_pathway	FLT1	Increase oxygen delivery; Angiogenesis	3.51179e-22	0.683577	1	1	2.48986e-19	seurat_psf_5
34; Toll-like-receptor-signaling-pathway	Toll_like_receptor_signaling_pathway	IL1B	Inflammatory cytokines;Proinflammatory effects	5.08031e-22	0.561721	1	1	3.60194e-19	seurat_psf_5
25; Fc-epsilon-RI-signaling-pathway	Fc_epsilon_RI_signaling_pathway	MAPK14	DNA; Cytokine gene transcription	6.34336e-22	0.525959	1	1	4.49744e-19	seurat_psf_5
98; PI3K-Akt-signaling-pathway	PI3K_Akt_signaling_pathway	BCL2L1	Cell survival	7.45105e-22	0.725452	1	1	5.2828e-19	seurat_psf_5
3; Apoptosis	Apoptosis	BCL2L1	Pro-survival genes	2.35614e-21	0.750159	1	1	1.6705e-18	seurat_psf_5
86; Toll-like-receptor-signaling-pathway	Toll_like_receptor_signaling_pathway	IL12A	Inflammatory cytokines;Proinflammatory effects	3.81615e-21	0.563069	1	1	2.70565e-18	seurat_psf_5
31; p53-signaling-pathway	p53_signaling_pathway	ADGRB1	Inflammhibition of angiogenesis and metastasis	3.85882e-21	0.525667	1	1	2.7359e-18	seurat_psf_5
7; Apoptosis	Apoptosis	ENDOG	DNA fragmentation; Apoptosis	5.9243e-21	0.890998	1	1	4.20033e-18	seurat_psf_5
33; Wnt-signaling-pathway	Wnt_signaling_pathway	CCND1		7.4982e-21	0.697539	1	1	5.31623e-18	seurat_psf_5
59; cAMP-signaling-pathway	cAMP_signaling_pathway	AFDN	Cytoskeletal rearrangenent((vascular endothelial cell)	9.67997e-21	0.560812	1	1	6.8631e-18	seurat_psf_5
90; Hippo-signaling-pathway	Hippo_signaling_pathway	BBC3	Proapoptotic genes	1.91459e-20	0.662637	1	1	1.35745e-17	seurat_psf_5
40; Toll-like-receptor-signaling-pathway	Toll_like_receptor_signaling_pathway	CCL5	Chemotactic effects ( Nutrophil, Immature DC )( NK cell )	1.9189e-20	0.56801	1	1	1.3605e-17	seurat_psf_5
6; B-cell-receptor-signaling-pathway	B_cell_receptor_signaling_pathway	NFKB1	DNA; B cell ontogeny; Autoimmunity; Anergy; Immuno response Ig production GC formation	5.30938e-20	0.870595	1	1	3.76435e-17	seurat_psf_5
138; TNF-signaling-pathway	TNF_signaling_pathway	NFKB1	Degradation; Cell survival	4.43005e-19	0.6429	1	1	3.14091e-16	seurat_psf_5
108; NF-kappa-B-signaling-pathway	NF_kappa_B_signaling_pathway	IKBKG		1.23456e-18	1.49941	1	1	8.753e-16	seurat_psf_5
103; Chemokine-signaling-pathway	Chemokine_signaling_pathway	PAK1		2.44278e-18	0.671	1	1	1.73193e-15	seurat_psf_5
168; C-type-lectin-receptor-signaling-pathway	C_type_lectin_receptor_signaling_pathway	IL12A	Th1 Th17 cell differentiation	3.73896e-18	0.956722	1	1	2.65092e-15	seurat_psf_5
102; C-type-lectin-receptor-signaling-pathway	C_type_lectin_receptor_signaling_pathway	IL10	Th1 Th17 cell differentiation	8.06033e-18	0.616049	1	1	5.71477e-15	seurat_psf_5
37; C-type-lectin-receptor-signaling-pathway	C_type_lectin_receptor_signaling_pathway	IL6	Th1 Th17 cell differentiation	1.00889e-17	0.613188	1	1	7.15301e-15	seurat_psf_5
38; C-type-lectin-receptor-signaling-pathway	C_type_lectin_receptor_signaling_pathway	IL12A	Th1 Th17 cell differentiation	2.03685e-17	0.623818	1	1	1.44412e-14	seurat_psf_5
15; p53-signaling-pathway	p53_signaling_pathway	TSC2	Inhibition of IGF-1/mTOR pathway	2.16531e-17	0.531446	1	1	1.53521e-14	seurat_psf_5
57; MAPK-signaling-pathway	MAPK_signaling_pathway	ELK1	p53 signaling pathway; Proliferation differentiation, inflammation	4.32192e-17	0.648222	1	1	3.06424e-14	seurat_psf_5
11; Apoptosis	Apoptosis	DFFB	DNA fragmentation; Apoptosis	8.72207e-17	0.741739	1	1	6.18395e-14	seurat_psf_5
54; Chemokine-signaling-pathway	Chemokine_signaling_pathway	ROCK1		1.88295e-16	0.652439	1	1	1.33501e-13	seurat_psf_5
38; Ras-signaling-pathway	Ras_signaling_pathway	MAPK8	Gene expression	3.72766e-16	0.56029	1	1	2.64291e-13	seurat_psf_5
18; mTOR-signaling-pathway	mTOR_signaling_pathway	RHOA	Cytoskeletal organization	4.84141e-16	0.848244	1	1	3.43256e-13	seurat_psf_5
11; HIF-1-signaling-pathway	HIF_1_signaling_pathway	SLC2A1	Reduce oxygen consumption; Promote anaerobic metabolism	9.97246e-16	0.586272	1	1	7.07048e-13	seurat_psf_5
58; Hippo-signaling-pathway	Hippo_signaling_pathway	SMAD7	Anti-apoptotic genes; Pro-proliferation genes	3.73574e-15	0.533123	1	1	2.64864e-12	seurat_psf_5
20; mTOR-signaling-pathway	mTOR_signaling_pathway	SGK1	Cell survival	4.48087e-15	0.657429	1	1	3.17694e-12	seurat_psf_5
116; EGFR-tyrosine-kinase-inhibitor-resistance	EGFR_tyrosine_kinase_inhibitor_resistance	STAT3	Abnormal dimerization of STAT 3; DNA; Differentiation; Growth; Proliferation; Survival; Motility; Angiogenesis	6.49207e-15	0.594849	1	1	4.60288e-12	seurat_psf_5
78; C-type-lectin-receptor-signaling-pathway	C_type_lectin_receptor_signaling_pathway	IL12A	Th1 Th17 cell differentiation	1.09648e-14	0.540842	1	1	7.77406e-12	seurat_psf_5
77; C-type-lectin-receptor-signaling-pathway	C_type_lectin_receptor_signaling_pathway	IL6	Th1 Th17 cell differentiation	1.31291e-14	0.534079	1	1	9.30851e-12	seurat_psf_5
76; C-type-lectin-receptor-signaling-pathway	C_type_lectin_receptor_signaling_pathway	IL23A	Th1 Th17 cell differentiation	1.7145e-14	0.540438	1	1	1.21558e-11	seurat_psf_5
79; C-type-lectin-receptor-signaling-pathway	C_type_lectin_receptor_signaling_pathway	IL1B	Th1 Th17 cell differentiation	2.44008e-14	0.527422	1	1	1.73002e-11	seurat_psf_5
156; C-type-lectin-receptor-signaling-pathway	C_type_lectin_receptor_signaling_pathway	IL10	Th1 Th17 cell differentiation	6.444e-14	0.52952	1	1	4.56879e-11	seurat_psf_5
173; C-type-lectin-receptor-signaling-pathway	C_type_lectin_receptor_signaling_pathway	C00584	Th1 Th17 cell differentiation	6.444e-14	0.52952	1	1	4.56879e-11	seurat_psf_5
129; C-type-lectin-receptor-signaling-pathway	C_type_lectin_receptor_signaling_pathway	IL12A	Th1 Th17 cell differentiation	7.59679e-14	0.536718	1	1	5.38613e-11	seurat_psf_5
149; C-type-lectin-receptor-signaling-pathway	C_type_lectin_receptor_signaling_pathway	IL6	Th1 Th17 cell differentiation	7.61747e-14	0.525799	1	1	5.40079e-11	seurat_psf_5
88; C-type-lectin-receptor-signaling-pathway	C_type_lectin_receptor_signaling_pathway	IL23A	Th1 Th17 cell differentiation	1.00109e-13	0.532305	1	1	7.09772e-11	seurat_psf_5
40; TNF-signaling-pathway	TNF_signaling_pathway	JUN		1.37321e-13	0.829959	1	1	9.73608e-11	seurat_psf_5
50; C-type-lectin-receptor-signaling-pathway	C_type_lectin_receptor_signaling_pathway	IL17D	Tfh cell differentiation	6.13736e-13	0.666655	1	1	4.35139e-10	seurat_psf_5
85; Cell-cycle	Cell_cycle	RAD21		9.43043e-13	0.8178	1	1	6.68617e-10	seurat_psf_5
97; Cell-cycle	Cell_cycle	E2F4	DNA; S-Phase proteins, CycE	2.71401e-12	0.518004	1	1	1.92423e-09	seurat_psf_5
95; NF-kappa-B-signaling-pathway	NF_kappa_B_signaling_pathway	BCL2L1	Survival	3.64713e-12	0.503659	1	1	2.58581e-09	seurat_psf_5
28; C-type-lectin-receptor-signaling-pathway	C_type_lectin_receptor_signaling_pathway	IL12A	Th1 Th17 cell differentiation	4.63599e-12	0.670094	1	1	3.28691e-09	seurat_psf_5
148; C-type-lectin-receptor-signaling-pathway	C_type_lectin_receptor_signaling_pathway	IL1B	Th1 Th17 cell differentiation	1.02977e-11	0.68186	1	1	7.30104e-09	seurat_psf_5
56; MAPK-signaling-pathway	MAPK_signaling_pathway	TP53	p53 signaling pathway; Proliferation differentiation, inflammation	4.8587e-11	0.500733	1	1	3.44481e-08	seurat_psf_5
30; Rap1-signaling-pathway	Rap1_signaling_pathway	ITGAL	Cell adhesion,migration,polarity	7.81957e-11	0.522744	1	1	5.54408e-08	seurat_psf_5
137; NF-kappa-B-signaling-pathway	NF_kappa_B_signaling_pathway	ICAM1	Lymphocyte adhesion, T-cell costimulation	9.38131e-10	1.34258	1	1	6.65135e-07	seurat_psf_5
135; NF-kappa-B-signaling-pathway	NF_kappa_B_signaling_pathway	CCL19	Lymphoid-tissue homing	1.27795e-09	1.33712	1	1	9.06066e-07	seurat_psf_5
136; NF-kappa-B-signaling-pathway	NF_kappa_B_signaling_pathway	TNFSF13B	B-cell development; B-cell survival	1.35198e-09	1.39076	1	1	9.58556e-07	seurat_psf_5
54; NF-kappa-B-signaling-pathway	NF_kappa_B_signaling_pathway	CCL13	Lymphoid-tissue homing	1.41394e-09	1.37712	1	1	1.00248e-06	seurat_psf_5
134; NF-kappa-B-signaling-pathway	NF_kappa_B_signaling_pathway	CCL21	Lymphoid-tissue homing	1.4762e-09	1.37229	1	1	1.04663e-06	seurat_psf_5
111; cAMP-signaling-pathway	cAMP_signaling_pathway	JUN	Hyperexcitability cell death/survival(hippocampal neuron)	2.56553e-07	0.627124	1	1	0.000181896	seurat_psf_5
42; MAPK-signaling-pathway	MAPK_signaling_pathway	Wnt signaling pathway		7.892e-07	0.562731	1	1	0.000559543	seurat_psf_5
55; NF-kappa-B-signaling-pathway	NF_kappa_B_signaling_pathway	CXCL12	Myeloiesis and B-cell lymphopoieses	4.9534e-06	1.16261	1	1	0.00351196	seurat_psf_5
49; HIF-1-signaling-pathway	HIF_1_signaling_pathway	EPO	Increase oxygen delivery; Erythropoiesis	1.40662e-36	1.44467	1	1	9.97296e-34	seurat_psf_6
55; HIF-1-signaling-pathway	HIF_1_signaling_pathway	ANGPT1	Increase oxygen delivery; Angiogenesis	1.42504e-36	1.45075	1	1	1.01035e-33	seurat_psf_6
59; HIF-1-signaling-pathway	HIF_1_signaling_pathway	NOS2	Increase oxygen delivery; Vascular tone	1.73564e-36	1.43757	1	1	1.23057e-33	seurat_psf_6
42; HIF-1-signaling-pathway	HIF_1_signaling_pathway	HK1	Reduce oxygen consumption; Promote anaerobic metabolism	2.01086e-36	1.51199	1	1	1.4257e-33	seurat_psf_6
54; HIF-1-signaling-pathway	HIF_1_signaling_pathway	SERPINE1	Increase oxygen delivery; Angiogenesis	2.24051e-36	1.44195	1	1	1.58852e-33	seurat_psf_6
57; HIF-1-signaling-pathway	HIF_1_signaling_pathway	TIMP1	Increase oxygen delivery; Angiogenesis	4.50726e-36	1.41885	1	1	3.19565e-33	seurat_psf_6
63; HIF-1-signaling-pathway	HIF_1_signaling_pathway	TIMP1	Matrix and barrier functions	4.50726e-36	1.41885	1	1	3.19565e-33	seurat_psf_6
53; HIF-1-signaling-pathway	HIF_1_signaling_pathway	EGF	Increase oxygen delivery; Angiogenesis	4.88085e-36	1.48118	1	1	3.46052e-33	seurat_psf_6
46; HIF-1-signaling-pathway	HIF_1_signaling_pathway	ENO1	Reduce oxygen consumption; Promote anaerobic metabolism	5.40007e-36	1.46496	1	1	3.82865e-33	seurat_psf_6
61; HIF-1-signaling-pathway	HIF_1_signaling_pathway	HMOX1	Increase oxygen delivery; Vascular tone	6.85455e-36	1.42004	1	1	4.85987e-33	seurat_psf_6
45; HIF-1-signaling-pathway	HIF_1_signaling_pathway	ALDOA	Reduce oxygen consumption; Promote anaerobic metabolism	1.06382e-35	1.41031	1	1	7.54246e-33	seurat_psf_6
44; HIF-1-signaling-pathway	HIF_1_signaling_pathway	GAPDH	Reduce oxygen consumption; Promote anaerobic metabolism	1.312e-35	1.43757	1	1	9.30209e-33	seurat_psf_6
58; HIF-1-signaling-pathway	HIF_1_signaling_pathway	EDN1	Increase oxygen delivery; Vascular tone	3.17187e-35	1.67637	1	1	2.24886e-32	seurat_psf_6
47; HIF-1-signaling-pathway	HIF_1_signaling_pathway	PGK1	Reduce oxygen consumption; Promote anaerobic metabolism	5.41533e-35	1.45237	1	1	3.83947e-32	seurat_psf_6
62; HIF-1-signaling-pathway	HIF_1_signaling_pathway	NPPA	Increase oxygen delivery; Vascular tone	6.89374e-35	1.47796	1	1	4.88766e-32	seurat_psf_6
64; HIF-1-signaling-pathway	HIF_1_signaling_pathway	LTBR	Inflammantion	2.15179e-34	1.41034	1	1	1.52562e-31	seurat_psf_6
88; HIF-1-signaling-pathway	HIF_1_signaling_pathway	BCL2	Reduce oxygen consumption; Regulate proliferation and apoptosis	3.47077e-34	1.48378	1	1	2.46077e-31	seurat_psf_6
60; HIF-1-signaling-pathway	HIF_1_signaling_pathway	NOS3	Increase oxygen delivery; Vascular tone	6.75806e-34	1.4855	1	1	4.79146e-31	seurat_psf_6
56; HIF-1-signaling-pathway	HIF_1_signaling_pathway	TEK	Increase oxygen delivery; Angiogenesis	1.05938e-33	1.48252	1	1	7.51099e-31	seurat_psf_6
89; HIF-1-signaling-pathway	HIF_1_signaling_pathway	CDKN1A	Reduce oxygen consumption; Regulate proliferation and apoptosis	1.01332e-32	1.60936	1	1	7.1844e-30	seurat_psf_6
48; HIF-1-signaling-pathway	HIF_1_signaling_pathway	PFKFB3	Reduce oxygen consumption; Promote anaerobic metabolism	1.55633e-32	1.41399	1	1	1.10344e-29	seurat_psf_6
43; HIF-1-signaling-pathway	HIF_1_signaling_pathway	PFKL	Reduce oxygen consumption; Promote anaerobic metabolism	2.16789e-31	1.53372	1	1	1.53703e-28	seurat_psf_6
51; HIF-1-signaling-pathway	HIF_1_signaling_pathway	TFRC	Increase oxygen delivery; Iron metabolism	8.75417e-30	1.54987	1	1	6.20671e-27	seurat_psf_6
52; HIF-1-signaling-pathway	HIF_1_signaling_pathway	FLT1	Increase oxygen delivery; Angiogenesis	1.12752e-29	1.4964	1	1	7.99408e-27	seurat_psf_6
11; HIF-1-signaling-pathway	HIF_1_signaling_pathway	SLC2A1	Reduce oxygen consumption; Promote anaerobic metabolism	5.51231e-29	1.75058	1	1	3.90823e-26	seurat_psf_6
5; HIF-1-signaling-pathway	HIF_1_signaling_pathway	VEGFA	Increase oxygen delivery; Angiogenesis	6.94006e-29	1.30305	1	1	4.9205e-26	seurat_psf_6
33; HIF-1-signaling-pathway	HIF_1_signaling_pathway	C00186	Lactate	1.74361e-24	1.35597	1	1	1.23622e-21	seurat_psf_6
50; HIF-1-signaling-pathway	HIF_1_signaling_pathway	TF	Increase oxygen delivery; Iron metabolism	3.85043e-20	1.08682	1	1	2.72995e-17	seurat_psf_6
39; HIF-1-signaling-pathway	HIF_1_signaling_pathway	C00002	ATP	1.76405e-07	0.765652	1	1	0.000125071	seurat_psf_6
74; PPAR-signaling-pathway	PPAR_signaling_pathway	DBI	Fatty acid transport; Lipid metabolism	1.42697e-34	2.65286	1	1	1.01172e-31	seurat_psf_7
21; PPAR-signaling-pathway	PPAR_signaling_pathway	PLIN2	Adipocyte differentiation	1.86242e-34	1.70132	1	1	1.32045e-31	seurat_psf_7
18; PPAR-signaling-pathway	PPAR_signaling_pathway	AQP7B...	Gluconeogenesis	2.20409e-34	1.52648	1	1	1.5627e-31	seurat_psf_7
40; PPAR-signaling-pathway	PPAR_signaling_pathway	OLR1	Fatty acid transport; Lipid metabolism	2.20409e-34	1.52648	1	1	1.5627e-31	seurat_psf_7
50; PPAR-signaling-pathway	PPAR_signaling_pathway	MMP1	Adipocyte differentiation	2.20409e-34	1.52648	1	1	1.5627e-31	seurat_psf_7
64; PPAR-signaling-pathway	PPAR_signaling_pathway	ADIPOQ	Adipocyte differentiation	2.20409e-34	1.52648	1	1	1.5627e-31	seurat_psf_7
51; PPAR-signaling-pathway	PPAR_signaling_pathway	FABP4	Adipocyte differentiation	2.91938e-34	1.5169	1	1	2.06984e-31	seurat_psf_7
77; PPAR-signaling-pathway	PPAR_signaling_pathway	UCP1	Adaptive themogenesis	3.95104e-34	1.54862	1	1	2.80129e-31	seurat_psf_7
42; PPAR-signaling-pathway	PPAR_signaling_pathway	CD36	Fatty acid transport; Lipid metabolism	4.60046e-34	1.58493	1	1	3.26173e-31	seurat_psf_7
56; PPAR-signaling-pathway	PPAR_signaling_pathway	PDPK1	Cell survival	7.02029e-34	1.57532	1	1	4.97738e-31	seurat_psf_7
38; PPAR-signaling-pathway	PPAR_signaling_pathway	CPT1C	Fatty acid oxidation; Lipit metabolism	8.46165e-34	1.73392	1	1	5.99931e-31	seurat_psf_7
52; PPAR-signaling-pathway	PPAR_signaling_pathway	ANGPTL4	Adipocyte differentiation	9.25831e-34	2.18752	1	1	6.56414e-31	seurat_psf_7
47; PPAR-signaling-pathway	PPAR_signaling_pathway	SLC27A4	Fatty acid transport; Lipid metabolism	1.30036e-33	2.31724	1	1	9.21957e-31	seurat_psf_7
73; PPAR-signaling-pathway	PPAR_signaling_pathway	UBC	Ubiquitination	1.37653e-33	1.80729	1	1	9.75958e-31	seurat_psf_7
39; PPAR-signaling-pathway	PPAR_signaling_pathway	ACSL1	Fatty acid transport; Lipid metabolism	1.60076e-33	1.54601	1	1	1.13494e-30	seurat_psf_7
49; PPAR-signaling-pathway	PPAR_signaling_pathway	SORBS1	Adipocyte differentiation	1.80123e-33	1.65037	1	1	1.27707e-30	seurat_psf_7
66; PPAR-signaling-pathway	PPAR_signaling_pathway	SCD	Lipogenesis;; Lipid metabolism	2.55934e-33	1.92895	1	1	1.81457e-30	seurat_psf_7
71; PPAR-signaling-pathway	PPAR_signaling_pathway	CYP27A1	Cholesterol metabolism; Lipid metabilism	3.78661e-33	1.57762	1	1	2.68471e-30	seurat_psf_7
70; PPAR-signaling-pathway	PPAR_signaling_pathway	NR1H3	Cholesterol metabolism; Lipid metabilism	4.89251e-33	1.4686	1	1	3.46879e-30	seurat_psf_7
53; PPAR-signaling-pathway	PPAR_signaling_pathway	ACOX1	Fatty acid oxidation; Lipit metabolism	5.59662e-33	1.56828	1	1	3.968e-30	seurat_psf_7
67; PPAR-signaling-pathway	PPAR_signaling_pathway	FADS2	Lipogenesis;; Lipid metabolism	1.0367e-32	2.31445	1	1	7.35017e-30	seurat_psf_7
57; PPAR-signaling-pathway	PPAR_signaling_pathway	APOA2	Ketogenesis; Lipid metabolism	5.75667e-32	1.41419	1	1	4.08148e-29	seurat_psf_7
44; PPAR-signaling-pathway	PPAR_signaling_pathway	CYP7A1	Cholesterol metabolism; Lipid metabilism	6.59814e-32	1.4361	1	1	4.67808e-29	seurat_psf_7
55; PPAR-signaling-pathway	PPAR_signaling_pathway	FABP1	Fatty acid transport; Lipid metabolism	6.59814e-32	1.4361	1	1	4.67808e-29	seurat_psf_7
69; PPAR-signaling-pathway	PPAR_signaling_pathway	CYP8B1	Cholesterol metabolism; Lipid metabilism	6.59814e-32	1.4361	1	1	4.67808e-29	seurat_psf_7
75; PPAR-signaling-pathway	PPAR_signaling_pathway	APOA5	Ketogenesis; Lipid metabolism	6.59814e-32	1.4361	1	1	4.67808e-29	seurat_psf_7
19; PPAR-signaling-pathway	PPAR_signaling_pathway	GK	Gluconeogenesis	7.12402e-32	1.53355	1	1	5.05093e-29	seurat_psf_7
20; PPAR-signaling-pathway	PPAR_signaling_pathway	PCK1	Gluconeogenesis	1.0012e-31	1.68413	1	1	7.0985e-29	seurat_psf_7
31; PPAR-signaling-pathway	PPAR_signaling_pathway	SCP2	Fatty acid oxidation; Lipit metabolism	1.0012e-31	2.01176	1	1	7.09854e-29	seurat_psf_7
68; PPAR-signaling-pathway	PPAR_signaling_pathway	APOC3	Ketogenesis; Lipid metabolism	1.03581e-31	1.41534	1	1	7.34389e-29	seurat_psf_7
32; PPAR-signaling-pathway	PPAR_signaling_pathway	ACAA1	Fatty acid oxidation; Lipit metabolism	1.12285e-31	1.54553	1	1	7.96103e-29	seurat_psf_7
48; PPAR-signaling-pathway	PPAR_signaling_pathway	HMGCS1	Ketogenesis; Lipid metabolism	2.93982e-31	2.33804	1	1	2.08434e-28	seurat_psf_7
36; PPAR-signaling-pathway	PPAR_signaling_pathway	EHHADH	Fatty acid oxidation; Lipit metabolism	6.65868e-31	1.43806	1	1	4.721e-28	seurat_psf_7
72; PPAR-signaling-pathway	PPAR_signaling_pathway	APOA1	Ketogenesis; Lipid metabolism	8.33076e-31	1.39826	1	1	5.90651e-28	seurat_psf_7
34; PPAR-signaling-pathway	PPAR_signaling_pathway	ACADL	Fatty acid oxidation; Lipit metabolism	9.66407e-31	1.9744	1	1	6.85182e-28	seurat_psf_7
33; PPAR-signaling-pathway	PPAR_signaling_pathway	ACADM	Fatty acid oxidation; Lipit metabolism	1.03322e-30	1.79872	1	1	7.32555e-28	seurat_psf_7
54; PPAR-signaling-pathway	PPAR_signaling_pathway	ILK	Cell survival	1.38088e-30	1.91482	1	1	9.79041e-28	seurat_psf_7
37; PPAR-signaling-pathway	PPAR_signaling_pathway	CPT2	Fatty acid oxidation; Lipit metabolism	5.05898e-30	1.39213	1	1	3.58682e-27	seurat_psf_7
31; Complement-and-coagulation-cascades	Complement_and_coagulation_cascades	C6...	Membrane attack complex; Cell lysis	8.71454e-30	1.25454	1	1	6.17861e-27	seurat_psf_7
76; PPAR-signaling-pathway	PPAR_signaling_pathway	ME3	Lipogenesis;; Lipid metabolism	6.04891e-28	1.64229	1	1	4.28868e-25	seurat_psf_7
58; PPAR-signaling-pathway	PPAR_signaling_pathway	PLTP	Ketogenesis; Lipid metabolism	7.04898e-28	1.78363	1	1	4.99772e-25	seurat_psf_7
41; PPAR-signaling-pathway	PPAR_signaling_pathway	LPL	Fatty acid transport; Lipid metabolism	9.91409e-28	1.27306	1	1	7.02909e-25	seurat_psf_7
43; PPAR-signaling-pathway	PPAR_signaling_pathway	FABP3	Fatty acid transport; Lipid metabolism	1.6381e-26	1.21572	1	1	1.16141e-23	seurat_psf_7
11; cAMP-signaling-pathway	cAMP_signaling_pathway	C01330		6.32726e-23	0.950565	1	1	4.48603e-20	seurat_psf_7
36; cAMP-signaling-pathway	cAMP_signaling_pathway	C00238		6.32726e-23	0.950565	1	1	4.48603e-20	seurat_psf_7
36; JAK-STAT-signaling-pathway	JAK_STAT_signaling_pathway	GFAP	Differentation	6.70859e-23	1.23606	1	1	4.75639e-20	seurat_psf_7
44; Fc-gamma-R-mediated-phagocytosis	Fc_gamma_R_mediated_phagocytosis	GSN	Phagocytosis; Membrane traficking; Particle internalization; Phagosome closure; Phagosome-lysosome fusion	6.85738e-21	1.42997	1	1	4.86188e-18	seurat_psf_7
139; Chemokine-signaling-pathway	Chemokine_signaling_pathway	GSK3A...		2.50138e-20	-0.624414	1	1	1.77348e-17	seurat_psf_7
56; AMPK-signaling-pathway	AMPK_signaling_pathway	FASN	Repressed fatty acid syntheses	2.33278e-19	1.33863	1	1	1.65394e-16	seurat_psf_7
106; cGMP-PKG-signaling-pathway	cGMP_PKG_signaling_pathway	ATP1B4...		2.54014e-19	0.78939	1	1	1.80096e-16	seurat_psf_7
58; AMPK-signaling-pathway	AMPK_signaling_pathway	SCD	Repressed fatty acid syntheses	5.10322e-19	1.131	1	1	3.61819e-16	seurat_psf_7
54; Chemokine-signaling-pathway	Chemokine_signaling_pathway	ROCK1		2.96558e-18	1.0273	1	1	2.10259e-15	seurat_psf_7
161; Chemokine-signaling-pathway	Chemokine_signaling_pathway	BAD		3.98002e-17	-0.649472	1	1	2.82183e-14	seurat_psf_7
26; TGF-beta-signaling-pathway	TGF_beta_signaling_pathway	ID1	DNA; Osteoblast differentiation, neurogenesis, vental mesoderm specification	9.21345e-17	0.720975	1	1	6.53234e-14	seurat_psf_7
75; Chemokine-signaling-pathway	Chemokine_signaling_pathway	WAS		1.91888e-16	0.757017	1	1	1.36048e-13	seurat_psf_7
116; EGFR-tyrosine-kinase-inhibitor-resistance	EGFR_tyrosine_kinase_inhibitor_resistance	STAT3	Abnormal dimerization of STAT 3; DNA; Differentiation; Growth; Proliferation; Survival; Motility; Angiogenesis	5.81393e-16	1.27607	1	1	4.12208e-13	seurat_psf_7
138; Chemokine-signaling-pathway	Chemokine_signaling_pathway	FOXO3	DNA; Cytokine production; Cellular gowth and differentiation; Cell survival; Migration; Apoptosis	2.71235e-15	-0.592911	1	1	1.92306e-12	seurat_psf_7
12; Insulin-signaling-pathway	Insulin_signaling_pathway	FASN	Lipogenesis; Lipid homeostasis	1.33475e-14	1.30665	1	1	9.46336e-12	seurat_psf_7
103; Chemokine-signaling-pathway	Chemokine_signaling_pathway	PAK1		3.4105e-14	0.718143	1	1	2.41804e-11	seurat_psf_7
12; Notch-signaling-pathway	Notch_signaling_pathway	HES1		5.69386e-14	1.1157	1	1	4.03694e-11	seurat_psf_7
28; JAK-STAT-signaling-pathway	JAK_STAT_signaling_pathway	CCND1	Cell-cycle progression	4.77147e-13	0.649606	1	1	3.38297e-10	seurat_psf_7
31; p53-signaling-pathway	p53_signaling_pathway	ADGRB1	Inflammhibition of angiogenesis and metastasis	1.1217e-12	0.746244	1	1	7.95289e-10	seurat_psf_7
111; cGMP-PKG-signaling-pathway	cGMP_PKG_signaling_pathway	GTF2I	Transcription	2.47119e-12	0.637308	1	1	1.75207e-09	seurat_psf_7
57; AMPK-signaling-pathway	AMPK_signaling_pathway	ACACA	Repressed fatty acid syntheses	2.52253e-12	0.965538	1	1	1.78847e-09	seurat_psf_7
121; Chemokine-signaling-pathway	Chemokine_signaling_pathway	NFKB1	DNA; Cytokine production; Cellular gowth and differentiation; Cell survival; Migration; Apoptosis	9.68514e-12	0.747235	1	1	6.86676e-09	seurat_psf_7
14; Chemokine-signaling-pathway	Chemokine_signaling_pathway	PXN		1.54488e-11	0.814514	1	1	1.09532e-08	seurat_psf_7
77; Hippo-signaling-pathway	Hippo_signaling_pathway	CCND1	Anti-apoptotic genes; Pro-proliferation genes	2.87687e-11	0.962861	1	1	2.0397e-08	seurat_psf_7
11; Fc-epsilon-RI-signaling-pathway	Fc_epsilon_RI_signaling_pathway	C00374	Degranulation; Heparin; Toxic to parasites; Increase vascular permeabilityl Cause smiith muscle contraction	5.78918e-11	0.562782	1	1	4.10453e-08	seurat_psf_7
12; Fc-epsilon-RI-signaling-pathway	Fc_epsilon_RI_signaling_pathway	C00388	Degranulation; Histamine; Toxic to parasites; Increase vascular permeabilityl Cause smiith muscle contraction	5.78918e-11	0.562782	1	1	4.10453e-08	seurat_psf_7
62; HIF-1-signaling-pathway	HIF_1_signaling_pathway	NPPA	Increase oxygen delivery; Vascular tone	1.15005e-10	1.21308	1	1	8.15385e-08	seurat_psf_7
23; Fc-epsilon-RI-signaling-pathway	Fc_epsilon_RI_signaling_pathway	AKT3	DNA; Cytokine gene transcription	1.1988e-10	0.501263	1	1	8.49947e-08	seurat_psf_7
131; EGFR-tyrosine-kinase-inhibitor-resistance	EGFR_tyrosine_kinase_inhibitor_resistance	RPS6	Protein synthesis; Differentiation; Growth; Proliferation; Survival; Motility; Angiogenesis	1.435e-10	1.09409	1	1	1.01742e-07	seurat_psf_7
12; Hippo-signaling-pathway	Hippo_signaling_pathway	CTGF	Anti-apoptotic genes; Pro-proliferation genes	1.52761e-10	0.924663	1	1	1.08307e-07	seurat_psf_7
7; ErbB-signaling-pathway	ErbB_signaling_pathway	ERBB3	No signaling	2.41763e-10	1.60674	1	1	1.7141e-07	seurat_psf_7
20; Insulin-signaling-pathway	Insulin_signaling_pathway	PKLR	Glycolysis;Glucose homeostasis; Glycogenesis	3.04962e-10	0.787632	1	1	2.16218e-07	seurat_psf_7
52; HIF-1-signaling-pathway	HIF_1_signaling_pathway	FLT1	Increase oxygen delivery; Angiogenesis	4.78342e-10	0.724164	1	1	3.39145e-07	seurat_psf_7
30; JAK-STAT-signaling-pathway	JAK_STAT_signaling_pathway	CDKN1A	Cell-cycle inhibition	5.77606e-10	0.541605	1	1	4.09523e-07	seurat_psf_7
24; Insulin-signaling-pathway	Insulin_signaling_pathway	ACACA	Lipogenesis; Lipid homeostasis	6.41099e-10	0.706381	1	1	4.54539e-07	seurat_psf_7
103; cGMP-PKG-signaling-pathway	cGMP_PKG_signaling_pathway	VASP	Cell growth and differentiantion; Platelet inhibition	6.85661e-10	0.668126	1	1	4.86134e-07	seurat_psf_7
29; p53-signaling-pathway	p53_signaling_pathway	IGF1	Apoptosis	9.59756e-10	0.801268	1	1	6.80467e-07	seurat_psf_7
57; Insulin-signaling-pathway	Insulin_signaling_pathway	GCK	Glycolysis;Glucose homeostasis; Glycogenesis	1.7365e-09	0.737681	1	1	1.23118e-06	seurat_psf_7
19; NOD-like-receptor-signaling-pathway	NOD_like_receptor_signaling_pathway	IL1B		3.59186e-09	0.912332	1	1	2.54663e-06	seurat_psf_7
89; HIF-1-signaling-pathway	HIF_1_signaling_pathway	CDKN1A	Reduce oxygen consumption; Regulate proliferation and apoptosis	4.76068e-09	0.631983	1	1	3.37532e-06	seurat_psf_7
75; Hippo-signaling-pathway	Hippo_signaling_pathway	NKD1	Anti-apoptotic genes; Pro-proliferation genes	6.86716e-09	1.15292	1	1	4.86882e-06	seurat_psf_7
132; EGFR-tyrosine-kinase-inhibitor-resistance	EGFR_tyrosine_kinase_inhibitor_resistance	EIF4E	Protein synthesis; Differentiation; Growth; Proliferation; Survival; Motility; Angiogenesis	1.24299e-08	0.914013	1	1	8.81279e-06	seurat_psf_7
38; VEGF-signaling-pathway	VEGF_signaling_pathway	BAD	Survival	1.8944e-08	-0.535624	1	1	1.34313e-05	seurat_psf_7
16; VEGF-signaling-pathway	VEGF_signaling_pathway	HSPB1	Action reorganization; Migration	2.62879e-08	0.973322	1	1	1.86381e-05	seurat_psf_7
30; Fc-epsilon-RI-signaling-pathway	Fc_epsilon_RI_signaling_pathway	PRKCA	DNA; Cytokine gene transcription	3.66282e-08	0.586237	1	1	2.59694e-05	seurat_psf_7
18; mTOR-signaling-pathway	mTOR_signaling_pathway	RHOA	Cytoskeletal organization	7.16165e-08	0.923763	1	1	5.07761e-05	seurat_psf_7
42; Fc-gamma-R-mediated-phagocytosis	Fc_gamma_R_mediated_phagocytosis	MYO10	Phagocytosis; Membrane remodeling; Focal exocytosis; Pseudopod extention; Particle internalization	7.83947e-08	0.558797	1	1	5.55818e-05	seurat_psf_7
39; VEGF-signaling-pathway	VEGF_signaling_pathway	RAC1	Action reorganization; Migration	1.22511e-07	0.798159	1	1	8.68606e-05	seurat_psf_7
88; Hippo-signaling-pathway	Hippo_signaling_pathway	ID1	Anti-apoptotic genes; Pro-proliferation genes	2.00355e-07	0.79808	1	1	0.000142052	seurat_psf_7
11; HIF-1-signaling-pathway	HIF_1_signaling_pathway	SLC2A1	Reduce oxygen consumption; Promote anaerobic metabolism	2.18566e-07	0.815634	1	1	0.000154964	seurat_psf_7
76; Hippo-signaling-pathway	Hippo_signaling_pathway	MYC	Anti-apoptotic genes; Pro-proliferation genes	2.48437e-07	0.886279	1	1	0.000176142	seurat_psf_7
79; Hippo-signaling-pathway	Hippo_signaling_pathway	SNAI2	Anti-apoptotic genes; Pro-proliferation genes	2.68521e-07	0.705889	1	1	0.000190382	seurat_psf_7
5; HIF-1-signaling-pathway	HIF_1_signaling_pathway	VEGFA	Increase oxygen delivery; Angiogenesis	3.07283e-07	0.635572	1	1	0.000217864	seurat_psf_7
2; VEGF-signaling-pathway	VEGF_signaling_pathway	C00533	Migration	4.19086e-07	0.855918	1	1	0.000297132	seurat_psf_7
50; C-type-lectin-receptor-signaling-pathway	C_type_lectin_receptor_signaling_pathway	IL17D	Tfh cell differentiation	7.94207e-07	1.2389	1	1	0.000563092	seurat_psf_7
25; Fc-epsilon-RI-signaling-pathway	Fc_epsilon_RI_signaling_pathway	MAPK14	DNA; Cytokine gene transcription	1.7873e-06	0.527764	1	1	0.0012672	seurat_psf_7
78; Hippo-signaling-pathway	Hippo_signaling_pathway	SOX2	Anti-apoptotic genes; Pro-proliferation genes	2.07065e-06	0.676306	1	1	0.00146809	seurat_psf_7
96; Hippo-signaling-pathway	Hippo_signaling_pathway	FGF1	Anti-apoptotic genes; Pro-proliferation genes	3.2316e-06	0.657462	1	1	0.0022912	seurat_psf_7
80; Hippo-signaling-pathway	Hippo_signaling_pathway	BIRC2	Anti-apoptotic genes; Pro-proliferation genes	4.11845e-06	0.639587	1	1	0.00291998	seurat_psf_7
25; VEGF-signaling-pathway	VEGF_signaling_pathway	PXN	Focal adhesion turnover; Migration	7.16108e-06	0.863665	1	1	0.00507721	seurat_psf_7
74; Hippo-signaling-pathway	Hippo_signaling_pathway	AXIN1	Anti-apoptotic genes; Pro-proliferation genes	7.38084e-06	0.64162	1	1	0.00523301	seurat_psf_7
94; Hippo-signaling-pathway	Hippo_signaling_pathway	GLI2	Anti-apoptotic genes; Pro-proliferation genes	1.24495e-05	0.728741	1	1	0.00882671	seurat_psf_7
51; RIG-I-like-receptor-signaling-pathway	RIG_I_like_receptor_signaling_pathway	CXCL8	Inflammatory cytokines; Protein synthesis; Growth arrest; Dendrition cell activation; NK cell activation; Antibody production; Apoptosis	1.2625e-05	0.565012	1	1	0.00895113	seurat_psf_7
52; RIG-I-like-receptor-signaling-pathway	RIG_I_like_receptor_signaling_pathway	TNF	Inflammatory cytokines; Protein synthesis; Growth arrest; Dendrition cell activation; NK cell activation; Antibody production; Apoptosis	1.2625e-05	0.565012	1	1	0.00895113	seurat_psf_7
54; RIG-I-like-receptor-signaling-pathway	RIG_I_like_receptor_signaling_pathway	CXCL10	Inflammatory cytokines; Protein synthesis; Growth arrest; Dendrition cell activation; NK cell activation; Antibody production; Apoptosis	1.45991e-05	0.551191	1	1	0.0103507	seurat_psf_7
20; NOD-like-receptor-signaling-pathway	NOD_like_receptor_signaling_pathway	IL18		1.49736e-05	1.21129	1	1	0.0106163	seurat_psf_7
43; Insulin-signaling-pathway	Insulin_signaling_pathway	G6PC	Glycolysis;Glucose homeostasis; Glycogenesis	1.71139e-05	0.740755	1	1	0.0121337	seurat_psf_7
53; HIF-1-signaling-pathway	HIF_1_signaling_pathway	EGF	Increase oxygen delivery; Angiogenesis	2.28784e-05	0.502744	1	1	0.0162208	seurat_psf_7
18; Toll-like-receptor-signaling-pathway	Toll_like_receptor_signaling_pathway	CXCL11	Chemptactic effects ( T cell )	2.49866e-05	0.517365	1	1	0.0177155	seurat_psf_7
77; Toll-like-receptor-signaling-pathway	Toll_like_receptor_signaling_pathway	CXCL9	Chemptactic effects ( T cell )	2.49866e-05	0.517365	1	1	0.0177155	seurat_psf_7
19; Toll-like-receptor-signaling-pathway	Toll_like_receptor_signaling_pathway	CXCL10	Chemptactic effects ( T cell )	2.94294e-05	0.509897	1	1	0.0208654	seurat_psf_7
118; cAMP-signaling-pathway	cAMP_signaling_pathway	MYL9	Relaxation (endothelial cell, smooth muscle cell)	3.24451e-05	0.932166	1	1	0.0230036	seurat_psf_7
27; Fc-gamma-R-mediated-phagocytosis	Fc_gamma_R_mediated_phagocytosis	ARPC5	Phagocytosis; Membrane traficking; Particle internalization; Phagosome closure; Phagosome-lysosome fusion	3.71323e-05	0.617111	1	1	0.0263268	seurat_psf_7
53; RIG-I-like-receptor-signaling-pathway	RIG_I_like_receptor_signaling_pathway	IL12A	Inflammatory cytokines; Protein synthesis; Growth arrest; Dendrition cell activation; NK cell activation; Antibody production; Apoptosis	5.91642e-05	0.504153	1	1	0.0419474	seurat_psf_7
156; C-type-lectin-receptor-signaling-pathway	C_type_lectin_receptor_signaling_pathway	IL10	Th1 Th17 cell differentiation	8.2219e-33	3.16767	1	1	5.82933e-30	seurat_psf_8
173; C-type-lectin-receptor-signaling-pathway	C_type_lectin_receptor_signaling_pathway	C00584	Th1 Th17 cell differentiation	8.2219e-33	3.16767	1	1	5.82933e-30	seurat_psf_8
149; C-type-lectin-receptor-signaling-pathway	C_type_lectin_receptor_signaling_pathway	IL6	Th1 Th17 cell differentiation	8.69719e-33	3.1625	1	1	6.16631e-30	seurat_psf_8
88; C-type-lectin-receptor-signaling-pathway	C_type_lectin_receptor_signaling_pathway	IL23A	Th1 Th17 cell differentiation	8.95468e-33	3.17985	1	1	6.34887e-30	seurat_psf_8
77; C-type-lectin-receptor-signaling-pathway	C_type_lectin_receptor_signaling_pathway	IL6	Th1 Th17 cell differentiation	1.27918e-32	3.11706	1	1	9.0694e-30	seurat_psf_8
79; C-type-lectin-receptor-signaling-pathway	C_type_lectin_receptor_signaling_pathway	IL1B	Th1 Th17 cell differentiation	1.3186e-32	3.10595	1	1	9.34886e-30	seurat_psf_8
76; C-type-lectin-receptor-signaling-pathway	C_type_lectin_receptor_signaling_pathway	IL23A	Th1 Th17 cell differentiation	1.37791e-32	3.13568	1	1	9.76937e-30	seurat_psf_8
129; C-type-lectin-receptor-signaling-pathway	C_type_lectin_receptor_signaling_pathway	IL12A	Th1 Th17 cell differentiation	1.64663e-32	3.0749	1	1	1.16746e-29	seurat_psf_8
33; C-type-lectin-receptor-signaling-pathway	C_type_lectin_receptor_signaling_pathway	IL1B	Th1 Th17 cell differentiation	1.69077e-32	2.98046	1	1	1.19875e-29	seurat_psf_8
101; C-type-lectin-receptor-signaling-pathway	C_type_lectin_receptor_signaling_pathway	TNF	Th1 Th17 cell differentiation	1.80098e-32	3.0913	1	1	1.27689e-29	seurat_psf_8
63; C-type-lectin-receptor-signaling-pathway	C_type_lectin_receptor_signaling_pathway	IL6	Th1 Th17 cell differentiation	1.86453e-32	3.0869	1	1	1.32195e-29	seurat_psf_8
64; C-type-lectin-receptor-signaling-pathway	C_type_lectin_receptor_signaling_pathway	IL1B	Th1 Th17 cell differentiation	1.90942e-32	3.07624	1	1	1.35378e-29	seurat_psf_8
62; C-type-lectin-receptor-signaling-pathway	C_type_lectin_receptor_signaling_pathway	IL23A	Th1 Th17 cell differentiation	1.9823e-32	3.10585	1	1	1.40545e-29	seurat_psf_8
78; C-type-lectin-receptor-signaling-pathway	C_type_lectin_receptor_signaling_pathway	IL12A	Th1 Th17 cell differentiation	2.58042e-32	3.02686	1	1	1.82951e-29	seurat_psf_8
102; C-type-lectin-receptor-signaling-pathway	C_type_lectin_receptor_signaling_pathway	IL10	Th1 Th17 cell differentiation	2.74802e-31	2.48501	1	1	1.94834e-28	seurat_psf_8
37; C-type-lectin-receptor-signaling-pathway	C_type_lectin_receptor_signaling_pathway	IL6	Th1 Th17 cell differentiation	2.8785e-31	2.48108	1	1	2.04086e-28	seurat_psf_8
38; C-type-lectin-receptor-signaling-pathway	C_type_lectin_receptor_signaling_pathway	IL12A	Th1 Th17 cell differentiation	9.86822e-31	2.3926	1	1	6.99657e-28	seurat_psf_8
166; NOD-like-receptor-signaling-pathway	NOD_like_receptor_signaling_pathway	NLRP3		7.52351e-29	0.832333	1	1	5.33417e-26	seurat_psf_8
48; NOD-like-receptor-signaling-pathway	NOD_like_receptor_signaling_pathway	IL1B		1.11971e-27	0.821307	1	1	7.93876e-25	seurat_psf_8
93; NF-kappa-B-signaling-pathway	NF_kappa_B_signaling_pathway	PLAU	Survival	1.22746e-26	1.11842	1	1	8.70269e-24	seurat_psf_8
28; Cytosolic-DNA-sensing-pathway	Cytosolic_DNA_sensing_pathway	IL6	Pro-inflammatory cytokines and chemokines	6.73667e-23	0.605972	1	1	4.7763e-20	seurat_psf_8
148; C-type-lectin-receptor-signaling-pathway	C_type_lectin_receptor_signaling_pathway	IL1B	Th1 Th17 cell differentiation	3.55702e-22	1.64893	1	1	2.52193e-19	seurat_psf_8
96; NF-kappa-B-signaling-pathway	NF_kappa_B_signaling_pathway	BCL2A1	Survival	2.27989e-21	1.04691	1	1	1.61644e-18	seurat_psf_8
28; C-type-lectin-receptor-signaling-pathway	C_type_lectin_receptor_signaling_pathway	IL12A	Th1 Th17 cell differentiation	2.44111e-21	1.57606	1	1	1.73074e-18	seurat_psf_8
94; NF-kappa-B-signaling-pathway	NF_kappa_B_signaling_pathway	BCL2L1	Survival	1.2727e-19	1.09007	1	1	9.02345e-17	seurat_psf_8
95; NF-kappa-B-signaling-pathway	NF_kappa_B_signaling_pathway	BCL2L1	Survival	1.44578e-16	1.01196	1	1	1.02506e-13	seurat_psf_8
49; NOD-like-receptor-signaling-pathway	NOD_like_receptor_signaling_pathway	IL18		1.13607e-15	0.808783	1	1	8.05471e-13	seurat_psf_8
5; IL-17-signaling-pathway	IL_17_signaling_pathway	IL6	Chemokines; Autoimmune pathology; Neutrophil recruitment; Immunity to extracellular pathogens	5.25339e-15	1.25743	1	1	3.72465e-12	seurat_psf_8
50; HIF-1-signaling-pathway	HIF_1_signaling_pathway	TF	Increase oxygen delivery; Iron metabolism	7.28451e-08	0.91898	1	1	5.16472e-05	seurat_psf_8
86; Apoptosis	Apoptosis	BCL2L11	Pro-apoptotic genes	1.77731e-07	-0.536826	1	1	0.000126011	seurat_psf_8
83; Apoptosis	Apoptosis	TP53	Pro-apoptotic genes	1.85041e-07	-0.568232	1	1	0.000131194	seurat_psf_8
114; Apoptosis	Apoptosis	HRK	Pro-apoptotic genes	2.0387e-07	-0.625868	1	1	0.000144544	seurat_psf_8
84; Apoptosis	Apoptosis	FAS	Pro-apoptotic genes	3.03051e-07	-0.530364	1	1	0.000214863	seurat_psf_8
58; AMPK-signaling-pathway	AMPK_signaling_pathway	SCD	Repressed fatty acid syntheses	3.84181e-07	0.581295	1	1	0.000272384	seurat_psf_8
118; cAMP-signaling-pathway	cAMP_signaling_pathway	MYL9	Relaxation (endothelial cell, smooth muscle cell)	4.8561e-07	0.854845	1	1	0.000344297	seurat_psf_8
54; NF-kappa-B-signaling-pathway	NF_kappa_B_signaling_pathway	CCL13	Lymphoid-tissue homing	4.45265e-06	-0.706024	1	1	0.00315693	seurat_psf_8
136; NF-kappa-B-signaling-pathway	NF_kappa_B_signaling_pathway	TNFSF13B	B-cell development; B-cell survival	5.62594e-06	-0.71625	1	1	0.00398879	seurat_psf_8
134; NF-kappa-B-signaling-pathway	NF_kappa_B_signaling_pathway	CCL21	Lymphoid-tissue homing	6.97405e-06	-0.702696	1	1	0.0049446	seurat_psf_8
137; NF-kappa-B-signaling-pathway	NF_kappa_B_signaling_pathway	ICAM1	Lymphocyte adhesion, T-cell costimulation	8.00561e-06	-0.708976	1	1	0.00567598	seurat_psf_8
34; TGF-beta-signaling-pathway	TGF_beta_signaling_pathway	ROCK1		1.0608e-05	0.733392	1	1	0.00752109	seurat_psf_8
98; PI3K-Akt-signaling-pathway	PI3K_Akt_signaling_pathway	BCL2L1	Cell survival	1.152e-05	0.52544	1	1	0.00816767	seurat_psf_8
135; NF-kappa-B-signaling-pathway	NF_kappa_B_signaling_pathway	CCL19	Lymphoid-tissue homing	1.29432e-05	-0.709553	1	1	0.00917671	seurat_psf_8
74; PPAR-signaling-pathway	PPAR_signaling_pathway	DBI	Fatty acid transport; Lipid metabolism	1.24367e-106	-0.728297	1	1	8.81761e-104	spatialGE_exp_1
125; Endocrine-resistance	Endocrine_resistance	JUN	DNA; Transcription Proliferation	1.57348e-58	-1.15146	1	1	1.1156e-55	spatialGE_exp_1
126; Endocrine-resistance	Endocrine_resistance	FOS	DNA; Transcription Proliferation	2.29207e-53	-0.810568	1	1	1.62508e-50	spatialGE_exp_1
38; Fc-gamma-R-mediated-phagocytosis	Fc_gamma_R_mediated_phagocytosis	CFL1	Phagocytosis; Membrane traficking; Particle internalization; Phagosome closure; Phagosome-lysosome fusion	1.42015e-52	-0.609719	1	1	1.00689e-49	spatialGE_exp_1
3; Rap1-signaling-pathway	Rap1_signaling_pathway	MAPK1	Proliferation survival gene activation	1.54679e-47	-0.653484	1	1	1.09667e-44	spatialGE_exp_1
73; PI3K-Akt-signaling-pathway	PI3K_Akt_signaling_pathway	MAPK1	Cell proliferation Angiogenesis DNA repair	6.87652e-42	-0.625659	1	1	4.87545e-39	spatialGE_exp_1
36; JAK-STAT-signaling-pathway	JAK_STAT_signaling_pathway	GFAP	Differentation	1.36906e-39	-0.549972	1	1	9.70665e-37	spatialGE_exp_1
94; cGMP-PKG-signaling-pathway	cGMP_PKG_signaling_pathway	MAPK1	Platelet activation	9.19422e-37	-0.610635	1	1	6.5187e-34	spatialGE_exp_1
17; Rap1-signaling-pathway	Rap1_signaling_pathway	ACTB	Cell adhesion,migration,polarity	1.00638e-32	-0.518761	1	1	7.13526e-30	spatialGE_exp_1
50; HIF-1-signaling-pathway	HIF_1_signaling_pathway	TF	Increase oxygen delivery; Iron metabolism	2.62557e-28	-0.513276	1	1	1.86153e-25	spatialGE_exp_1
65; ErbB-signaling-pathway	ErbB_signaling_pathway	MYC	DNA; Adhesion	7.66525e-27	-1.03553	1	1	5.43466e-24	spatialGE_exp_1
6; Fc-epsilon-RI-signaling-pathway	Fc_epsilon_RI_signaling_pathway	C00696	Generation of eicosanoids	2.50344e-22	-0.894761	1	1	1.77494e-19	spatialGE_exp_1
7; Fc-epsilon-RI-signaling-pathway	Fc_epsilon_RI_signaling_pathway	C05952	Generation of eicosanoids	2.50344e-22	-0.894761	1	1	1.77494e-19	spatialGE_exp_1
8; Fc-epsilon-RI-signaling-pathway	Fc_epsilon_RI_signaling_pathway	C05951	Generation of eicosanoids	2.50344e-22	-0.894761	1	1	1.77494e-19	spatialGE_exp_1
9; Fc-epsilon-RI-signaling-pathway	Fc_epsilon_RI_signaling_pathway	C02166	Generation of eicosanoids	2.50344e-22	-0.894761	1	1	1.77494e-19	spatialGE_exp_1
18; Rap1-signaling-pathway	Rap1_signaling_pathway	CDH1	Cell adhesion,migration,polarity	7.10245e-22	-0.536877	1	1	5.03564e-19	spatialGE_exp_1
9; Insulin-signaling-pathway	Insulin_signaling_pathway	ELK1	DNA; Proliferation differentiation	3.52798e-20	-0.854735	1	1	2.50134e-17	spatialGE_exp_1
48; Rap1-signaling-pathway	Rap1_signaling_pathway	PARD3	Cell adhesion,migration,polarity	9.23514e-17	-0.664553	1	1	6.54771e-14	spatialGE_exp_1
109; Chemokine-signaling-pathway	Chemokine_signaling_pathway	MAPK1	DNA; Cytokine production; Cellular gowth and differentiation; Cell survival; Migration; Apoptosis	1.26181e-14	-0.787387	1	1	8.94622e-12	spatialGE_exp_1
78; Hippo-signaling-pathway	Hippo_signaling_pathway	SOX2	Anti-apoptotic genes; Pro-proliferation genes	1.33097e-11	-0.772702	1	1	9.43658e-09	spatialGE_exp_1
32; Insulin-signaling-pathway	Insulin_signaling_pathway	EIF4E	Protein synthesis	9.23993e-07	-0.6587	1	1	0.000655111	spatialGE_exp_1
8; Calcium-signaling-pathway	Calcium_signaling_pathway	PDE1A	Other signaling pathways	4.18906e-167	0.539063	1	1	2.97004e-164	spatialGE_exp_2
144; cGMP-PKG-signaling-pathway	cGMP_PKG_signaling_pathway	PDE2A		5.11627e-152	0.626404	1	1	3.62743e-149	spatialGE_exp_2
13; MAPK-signaling-pathway	MAPK_signaling_pathway	STMN1		1.26271e-130	-0.685527	1	1	8.95263e-128	spatialGE_exp_2
41; PPAR-signaling-pathway	PPAR_signaling_pathway	LPL	Fatty acid transport; Lipid metabolism	2.67378e-119	0.852562	1	1	1.89571e-116	spatialGE_exp_2
123; cAMP-signaling-pathway	cAMP_signaling_pathway	PAK1	Cytoskeletal remodelling, acherens junction enhancerment (vascular endothelial cell)	1.94473e-93	-0.62391	1	1	1.37881e-90	spatialGE_exp_2
36; PPAR-signaling-pathway	PPAR_signaling_pathway	EHHADH	Fatty acid oxidation; Lipit metabolism	2.34177e-82	0.50977	1	1	1.66032e-79	spatialGE_exp_2
52; MAPK-signaling-pathway	MAPK_signaling_pathway	MEF2C	DNA; Proliferation differentiation, inflammation	5.2258e-82	-0.69382	1	1	3.70509e-79	spatialGE_exp_2
56; C-type-lectin-receptor-signaling-pathway	C_type_lectin_receptor_signaling_pathway	IL6	Th2 cell differentiation	2.80833e-79	0.673651	1	1	1.99111e-76	spatialGE_exp_2
160; C-type-lectin-receptor-signaling-pathway	C_type_lectin_receptor_signaling_pathway	CCL22	Th2 cell differentiation	8.00248e-79	-0.746109	1	1	5.67376e-76	spatialGE_exp_2
55; C-type-lectin-receptor-signaling-pathway	C_type_lectin_receptor_signaling_pathway	IL10	Th2 cell differentiation	2.22588e-78	-0.739197	1	1	1.57815e-75	spatialGE_exp_2
22; C-type-lectin-receptor-signaling-pathway	C_type_lectin_receptor_signaling_pathway	IL23A	Th2 cell differentiation	5.93063e-78	0.664464	1	1	4.20482e-75	spatialGE_exp_2
161; C-type-lectin-receptor-signaling-pathway	C_type_lectin_receptor_signaling_pathway	CCL17	Th2 cell differentiation	1.45204e-76	-0.754912	1	1	1.0295e-73	spatialGE_exp_2
164; C-type-lectin-receptor-signaling-pathway	C_type_lectin_receptor_signaling_pathway	EGR2	Th1 Th17 cell differentiation	6.76303e-76	0.582965	1	1	4.79499e-73	spatialGE_exp_2
38; Fc-gamma-R-mediated-phagocytosis	Fc_gamma_R_mediated_phagocytosis	CFL1	Phagocytosis; Membrane traficking; Particle internalization; Phagosome closure; Phagosome-lysosome fusion	2.12263e-70	0.768943	1	1	1.50495e-67	spatialGE_exp_2
57; C-type-lectin-receptor-signaling-pathway	C_type_lectin_receptor_signaling_pathway	IL12A	Th2 cell differentiation	2.63357e-69	0.604852	1	1	1.8672e-66	spatialGE_exp_2
46; Insulin-signaling-pathway	Insulin_signaling_pathway	FBP1	Glycolysis;Glucose homeostasis; Glycogenesis	6.28482e-66	0.537801	1	1	4.45594e-63	spatialGE_exp_2
70; Ras-signaling-pathway	Ras_signaling_pathway	RIN1	Effectors	1.00094e-62	0.515217	1	1	7.09667e-60	spatialGE_exp_2
30; Rap1-signaling-pathway	Rap1_signaling_pathway	ITGAL	Cell adhesion,migration,polarity	6.77911e-60	0.575175	1	1	4.80639e-57	spatialGE_exp_2
17; Rap1-signaling-pathway	Rap1_signaling_pathway	ACTB	Cell adhesion,migration,polarity	2.23446e-52	0.546749	1	1	1.58423e-49	spatialGE_exp_2
48; Rap1-signaling-pathway	Rap1_signaling_pathway	PARD3	Cell adhesion,migration,polarity	4.27304e-45	0.72964	1	1	3.02959e-42	spatialGE_exp_2
82; Rap1-signaling-pathway	Rap1_signaling_pathway	ITGA2B	Cell adhesion,migration,polarity	7.39114e-44	0.602399	1	1	5.24031e-41	spatialGE_exp_2
15; AMPK-signaling-pathway	AMPK_signaling_pathway	FOXO1	Activated mitochondrial biogeneses	3.12529e-39	0.633104	1	1	2.21583e-36	spatialGE_exp_2
95; Rap1-signaling-pathway	Rap1_signaling_pathway	THBS1	Defective angiogensis	1.26072e-32	0.510999	1	1	8.93851e-30	spatialGE_exp_2
40; TNF-signaling-pathway	TNF_signaling_pathway	JUN		1.63271e-27	-0.54922	1	1	1.15759e-24	spatialGE_exp_2
168; C-type-lectin-receptor-signaling-pathway	C_type_lectin_receptor_signaling_pathway	IL12A	Th1 Th17 cell differentiation	4.67115e-15	-0.73356	1	1	3.31185e-12	spatialGE_exp_2
78; Hippo-signaling-pathway	Hippo_signaling_pathway	SOX2	Anti-apoptotic genes; Pro-proliferation genes	1.22528e-11	-0.713278	1	1	8.68725e-09	spatialGE_exp_2
12; Hippo-signaling-pathway	Hippo_signaling_pathway	CTGF	Anti-apoptotic genes; Pro-proliferation genes	1.6719e-05	-0.531796	1	1	0.0118538	spatialGE_exp_2
50; HIF-1-signaling-pathway	HIF_1_signaling_pathway	TF	Increase oxygen delivery; Iron metabolism	1.47649e-133	1.14139	1	1	1.04683e-130	spatialGE_exp_3
58; AMPK-signaling-pathway	AMPK_signaling_pathway	SCD	Repressed fatty acid syntheses	9.5623e-96	0.777544	1	1	6.77967e-93	spatialGE_exp_3
52; MAPK-signaling-pathway	MAPK_signaling_pathway	MEF2C	DNA; Proliferation differentiation, inflammation	3.44553e-68	-0.678511	1	1	2.44288e-65	spatialGE_exp_3
164; cGMP-PKG-signaling-pathway	cGMP_PKG_signaling_pathway	PPIF	Cardioprotection	6.97222e-54	0.704733	1	1	4.94331e-51	spatialGE_exp_3
114; Apoptosis	Apoptosis	HRK	Pro-apoptotic genes	2.09176e-48	-0.630371	1	1	1.48305e-45	spatialGE_exp_3
19; mTOR-signaling-pathway	mTOR_signaling_pathway	PRKCA	Cytoskeletal organization	3.22992e-48	-0.635332	1	1	2.29001e-45	spatialGE_exp_3
56; AMPK-signaling-pathway	AMPK_signaling_pathway	FASN	Repressed fatty acid syntheses	7.27191e-46	0.541165	1	1	5.15578e-43	spatialGE_exp_3
3; ErbB-signaling-pathway	ErbB_signaling_pathway	ELK1	DNA; Migration/ Invasion	1.74088e-43	-1.04791	1	1	1.23428e-40	spatialGE_exp_3
43; Ras-signaling-pathway	Ras_signaling_pathway	ELK1	Gene expression	1.10289e-42	-0.658651	1	1	7.81947e-40	spatialGE_exp_3
36; TNF-signaling-pathway	TNF_signaling_pathway	CREB3		4.43774e-42	-0.809244	1	1	3.14635e-39	spatialGE_exp_3
83; Apoptosis	Apoptosis	TP53	Pro-apoptotic genes	8.41249e-41	-0.518921	1	1	5.96445e-38	spatialGE_exp_3
44; Ras-signaling-pathway	Ras_signaling_pathway	ETS1	Gene expression	2.93596e-36	-0.505709	1	1	2.08159e-33	spatialGE_exp_3
36; JAK-STAT-signaling-pathway	JAK_STAT_signaling_pathway	GFAP	Differentation	6.72135e-36	0.522225	1	1	4.76544e-33	spatialGE_exp_3
135; NF-kappa-B-signaling-pathway	NF_kappa_B_signaling_pathway	CCL19	Lymphoid-tissue homing	8.29292e-36	-0.758353	1	1	5.87968e-33	spatialGE_exp_3
134; NF-kappa-B-signaling-pathway	NF_kappa_B_signaling_pathway	CCL21	Lymphoid-tissue homing	8.43793e-36	-0.78222	1	1	5.9825e-33	spatialGE_exp_3
54; NF-kappa-B-signaling-pathway	NF_kappa_B_signaling_pathway	CCL13	Lymphoid-tissue homing	1.65233e-35	-0.776108	1	1	1.17151e-32	spatialGE_exp_3
136; NF-kappa-B-signaling-pathway	NF_kappa_B_signaling_pathway	TNFSF13B	B-cell development; B-cell survival	1.46072e-34	-0.775472	1	1	1.03565e-31	spatialGE_exp_3
137; NF-kappa-B-signaling-pathway	NF_kappa_B_signaling_pathway	ICAM1	Lymphocyte adhesion, T-cell costimulation	4.31564e-34	-0.767131	1	1	3.05979e-31	spatialGE_exp_3
6; B-cell-receptor-signaling-pathway	B_cell_receptor_signaling_pathway	NFKB1	DNA; B cell ontogeny; Autoimmunity; Anergy; Immuno response Ig production GC formation	1.53377e-33	-0.507034	1	1	1.08744e-30	spatialGE_exp_3
10; T-cell-receptor-signaling-pathway	T_cell_receptor_signaling_pathway	IL5	Proliferation Differentation; Immuno response	9.22945e-29	-0.577972	1	1	6.54368e-26	spatialGE_exp_3
6; T-cell-receptor-signaling-pathway	T_cell_receptor_signaling_pathway	TNF	Proliferation Differentation; Immuno response	1.13336e-28	-0.572552	1	1	8.03553e-26	spatialGE_exp_3
7; T-cell-receptor-signaling-pathway	T_cell_receptor_signaling_pathway	CSF2	Proliferation Differentation; Immuno response	1.13336e-28	-0.572552	1	1	8.03553e-26	spatialGE_exp_3
8; T-cell-receptor-signaling-pathway	T_cell_receptor_signaling_pathway	IFNG	Proliferation Differentation; Immuno response	1.13336e-28	-0.572552	1	1	8.03553e-26	spatialGE_exp_3
9; T-cell-receptor-signaling-pathway	T_cell_receptor_signaling_pathway	IL10	Proliferation Differentation; Immuno response	1.13336e-28	-0.572552	1	1	8.03553e-26	spatialGE_exp_3
12; T-cell-receptor-signaling-pathway	T_cell_receptor_signaling_pathway	IL2	Proliferation Differentation; Immuno response	1.23905e-28	-0.606291	1	1	8.78487e-26	spatialGE_exp_3
11; T-cell-receptor-signaling-pathway	T_cell_receptor_signaling_pathway	IL4	Proliferation Differentation; Immuno response	1.81287e-28	-0.573466	1	1	1.28532e-25	spatialGE_exp_3
55; NF-kappa-B-signaling-pathway	NF_kappa_B_signaling_pathway	CXCL12	Myeloiesis and B-cell lymphopoieses	2.97535e-27	-0.608835	1	1	2.10953e-24	spatialGE_exp_3
62; mTOR-signaling-pathway	mTOR_signaling_pathway	TTI1		6.52916e-25	-0.5632	1	1	4.62918e-22	spatialGE_exp_3
9; Insulin-signaling-pathway	Insulin_signaling_pathway	ELK1	DNA; Proliferation differentiation	1.08666e-24	-0.858559	1	1	7.70442e-22	spatialGE_exp_3
94; cGMP-PKG-signaling-pathway	cGMP_PKG_signaling_pathway	MAPK1	Platelet activation	4.22455e-24	-0.552849	1	1	2.99521e-21	spatialGE_exp_3
53; mTOR-signaling-pathway	mTOR_signaling_pathway	GRB10	Lipolysis	2.8192e-22	-0.535794	1	1	1.99882e-19	spatialGE_exp_3
81; mTOR-signaling-pathway	mTOR_signaling_pathway	CLIP1	Microtubule organization	5.31281e-22	-0.661962	1	1	3.76678e-19	spatialGE_exp_3
65; ErbB-signaling-pathway	ErbB_signaling_pathway	MYC	DNA; Adhesion	5.2845e-18	-0.839267	1	1	3.74671e-15	spatialGE_exp_3
16; mTOR-signaling-pathway	mTOR_signaling_pathway	LPIN1	Lipid biosynthesis	2.97991e-17	-0.515307	1	1	2.11275e-14	spatialGE_exp_3
109; Chemokine-signaling-pathway	Chemokine_signaling_pathway	MAPK1	DNA; Cytokine production; Cellular gowth and differentiation; Cell survival; Migration; Apoptosis	1.08663e-16	-0.718341	1	1	7.70423e-14	spatialGE_exp_3
6; Fc-epsilon-RI-signaling-pathway	Fc_epsilon_RI_signaling_pathway	C00696	Generation of eicosanoids	1.69539e-15	-0.776141	1	1	1.20203e-12	spatialGE_exp_3
7; Fc-epsilon-RI-signaling-pathway	Fc_epsilon_RI_signaling_pathway	C05952	Generation of eicosanoids	1.69539e-15	-0.776141	1	1	1.20203e-12	spatialGE_exp_3
8; Fc-epsilon-RI-signaling-pathway	Fc_epsilon_RI_signaling_pathway	C05951	Generation of eicosanoids	1.69539e-15	-0.776141	1	1	1.20203e-12	spatialGE_exp_3
9; Fc-epsilon-RI-signaling-pathway	Fc_epsilon_RI_signaling_pathway	C02166	Generation of eicosanoids	1.69539e-15	-0.776141	1	1	1.20203e-12	spatialGE_exp_3
31; mTOR-signaling-pathway	mTOR_signaling_pathway	EIF4E	Cap-dependent translocation; Protein systhesis	2.7608e-13	-0.53326	1	1	1.9574e-10	spatialGE_exp_3
126; Endocrine-resistance	Endocrine_resistance	FOS	DNA; Transcription Proliferation	3.05169e-12	-0.74231	1	1	2.16365e-09	spatialGE_exp_3
56; mTOR-signaling-pathway	mTOR_signaling_pathway	EIF4B	Cap-dependent translocation; Protein systhesis	5.28653e-11	-0.503608	1	1	3.74815e-08	spatialGE_exp_3
5; T-cell-receptor-signaling-pathway	T_cell_receptor_signaling_pathway	CDK4	Proliferation Differentation; Immuno response	6.08485e-10	-0.623947	1	1	4.31416e-07	spatialGE_exp_3
32; Insulin-signaling-pathway	Insulin_signaling_pathway	EIF4E	Protein synthesis	9.50138e-10	-0.613984	1	1	6.73648e-07	spatialGE_exp_3
52; MAPK-signaling-pathway	MAPK_signaling_pathway	MEF2C	DNA; Proliferation differentiation, inflammation	5.95964e-68	0.767732	1	1	4.22539e-65	spatialGE_exp_4
50; HIF-1-signaling-pathway	HIF_1_signaling_pathway	TF	Increase oxygen delivery; Iron metabolism	1.09888e-54	-0.768129	1	1	7.79109e-52	spatialGE_exp_4
74; PPAR-signaling-pathway	PPAR_signaling_pathway	DBI	Fatty acid transport; Lipid metabolism	2.12806e-43	-0.675631	1	1	1.50879e-40	spatialGE_exp_4
17; Rap1-signaling-pathway	Rap1_signaling_pathway	ACTB	Cell adhesion,migration,polarity	2.76437e-39	-0.755544	1	1	1.95993e-36	spatialGE_exp_4
36; JAK-STAT-signaling-pathway	JAK_STAT_signaling_pathway	GFAP	Differentation	5.87505e-19	-0.519654	1	1	4.16541e-16	spatialGE_exp_4
18; Rap1-signaling-pathway	Rap1_signaling_pathway	CDH1	Cell adhesion,migration,polarity	4.722e-18	-0.611697	1	1	3.3479e-15	spatialGE_exp_4
30; Rap1-signaling-pathway	Rap1_signaling_pathway	ITGAL	Cell adhesion,migration,polarity	7.49762e-18	-0.532699	1	1	5.31581e-15	spatialGE_exp_4
12; Hippo-signaling-pathway	Hippo_signaling_pathway	CTGF	Anti-apoptotic genes; Pro-proliferation genes	6.67668e-17	-0.654728	1	1	4.73377e-14	spatialGE_exp_4
5; T-cell-receptor-signaling-pathway	T_cell_receptor_signaling_pathway	CDK4	Proliferation Differentation; Immuno response	4.15877e-13	-0.697205	1	1	2.94857e-10	spatialGE_exp_4
48; Rap1-signaling-pathway	Rap1_signaling_pathway	PARD3	Cell adhesion,migration,polarity	5.4904e-11	-0.636553	1	1	3.89269e-08	spatialGE_exp_4
24; B-cell-receptor-signaling-pathway	B_cell_receptor_signaling_pathway	FOS	DNA; B cell ontogeny; Autoimmunity; Anergy; Immuno response Ig production GC formation	6.6577e-10	-0.522329	1	1	4.72031e-07	spatialGE_exp_4
168; C-type-lectin-receptor-signaling-pathway	C_type_lectin_receptor_signaling_pathway	IL12A	Th1 Th17 cell differentiation	2.12821e-08	-0.64484	1	1	1.5089e-05	spatialGE_exp_4
78; Hippo-signaling-pathway	Hippo_signaling_pathway	SOX2	Anti-apoptotic genes; Pro-proliferation genes	2.40899e-07	-0.545697	1	1	0.000170797	spatialGE_exp_4
32; Insulin-signaling-pathway	Insulin_signaling_pathway	EIF4E	Protein synthesis	4.08565e-07	-0.571797	1	1	0.000289673	spatialGE_exp_4
2; NF-kappa-B-signaling-pathway	NF_kappa_B_signaling_pathway	BCL2L1	Survival	6.23923e-06	-0.586831	1	1	0.00442362	spatialGE_exp_4
132; NF-kappa-B-signaling-pathway	NF_kappa_B_signaling_pathway	VCAM1	Inflammation	3.12051e-05	-0.626546	1	1	0.0221244	spatialGE_exp_4
125; Endocrine-resistance	Endocrine_resistance	JUN	DNA; Transcription Proliferation	4.70446e-05	-0.869259	1	1	0.0333547	spatialGE_exp_4
164; C-type-lectin-receptor-signaling-pathway	C_type_lectin_receptor_signaling_pathway	EGR2	Th1 Th17 cell differentiation	2.37685e-37	-0.544564	1	1	1.68518e-34	spatialGE_exp_5
36; JAK-STAT-signaling-pathway	JAK_STAT_signaling_pathway	GFAP	Differentation	2.36945e-22	0.702308	1	1	1.67994e-19	spatialGE_exp_5
118; cAMP-signaling-pathway	cAMP_signaling_pathway	MYL9	Relaxation (endothelial cell, smooth muscle cell)	1.1623e-18	0.809872	1	1	8.24071e-16	spatialGE_exp_5
3; ErbB-signaling-pathway	ErbB_signaling_pathway	ELK1	DNA; Migration/ Invasion	1.18468e-17	-0.959074	1	1	8.39935e-15	spatialGE_exp_5
9; Insulin-signaling-pathway	Insulin_signaling_pathway	ELK1	DNA; Proliferation differentiation	5.51375e-16	-0.808486	1	1	3.90925e-13	spatialGE_exp_5
12; T-cell-receptor-signaling-pathway	T_cell_receptor_signaling_pathway	IL2	Proliferation Differentation; Immuno response	4.0471e-15	-0.558928	1	1	2.8694e-12	spatialGE_exp_5
11; T-cell-receptor-signaling-pathway	T_cell_receptor_signaling_pathway	IL4	Proliferation Differentation; Immuno response	1.95975e-13	-0.518074	1	1	1.38946e-10	spatialGE_exp_5
10; T-cell-receptor-signaling-pathway	T_cell_receptor_signaling_pathway	IL5	Proliferation Differentation; Immuno response	2.65645e-13	-0.516476	1	1	1.88342e-10	spatialGE_exp_5
[truncated: 2,276 more rows]

## Sheet: GSDensity pathways
Pahtway	cluster
Apoptosis	seurat_exp_0
Rap1_signaling_pathway	seurat_exp_0
cAMP_signaling_pathway	seurat_exp_0
[truncated: 216 more rows]
