# Supplementary material for: Topology-aware pathway analysis of spatial transcriptomics
Source: PeerJ. 2025 Aug 14;13:e19729. doi: 10.7717/peerj.19729 (PMC12358110; doi:10.7717/peerj.19729)
Supplement: Supplemental Information 3 — Each sheet in the dataset represents the results of one comparison between border and core spot groups within the same cluster. [file peerj-13-19729-s003.xlsx]

## Sheet: PSF cluster 3 border vs core
Pathway name	sink name	log2 fc	p val	p val adj	Is deregulated (PSF logFC > |1| AND adjusted p < 0.05)	Sink associated process	Dowstream pathway
cAMP_signaling_pathway	JUN	1.21102	0.000237646	0.046752	Yes	Hyperexcitability cell death/survival(hippocampal neuron)
ErbB_signaling_pathway	JUN	2.12848	0.000260445	0.046752	Yes	DNA; Angiogenesis
FoxO_signaling_pathway	CDKN2B	0.708623	0.000200255	0.046752	No	Cell cycle regulation	Cell cycle
FoxO_signaling_pathway	SOD2	0.906879	0.000397561	0.046752	No	Oxidative stress resistance & DNA repair
Hedgehog_signaling_pathway	GLI1	0.545249	0.000452306	0.046752	No	Activiation of Hh target genes; Cell prolifeation tissue patterning stem cell maintenance,
Hedgehog_signaling_pathway	CCND1	0.634711	0.000461585	0.046752	No	Respression of Hh target genes; Cell prolifeation tissue patterning stem cell maintenance, development, ect
p53_signaling_pathway	THBS1	1.47857	0.000360454	0.046752	Yes	Inflammhibition of angiogenesis and metastasis

## Sheet: PSF cluster 1 border1 vs core
Pathway name	sink name	log2 fc	p val	p val adj	Is deregulated (PSF logFC > |1| AND adjusted p < 0.05)	Sink associated process	Dowstream pathway
cAMP_signaling_pathway	MYL9	2.21431	1.18328e-06	0.000838948	Yes	Relaxation (endothelial cell, smooth muscle cell)
Fc_gamma_R_mediated_phagocytosis	GSN	1.66182	1.52155e-05	0.00359594	Yes	Phagocytosis; Membrane traficking; Particle internalization; Phagosome closure; Phagosome-lysosome fusion	Regulation of actin cytoskeleton; Lysosome
Fc_gamma_R_mediated_phagocytosis	ARF6	1.82933	1.16754e-05	0.00359594	Yes	Phagocytosis; Membrane traficking; Particle internalization; Phagosome closure; Phagosome-lysosome fusion	Regulation of actin cytoskeleton; Lysosome
Fc_gamma_R_mediated_phagocytosis	ARPC5	2.86737	0.000110774	0.0196346	Yes	Phagocytosis; Membrane traficking; Particle internalization; Phagosome closure; Phagosome-lysosome fusion	Regulation of actin cytoskeleton; Lysosome
Toll_like_receptor_signaling_pathway	CCL4L1	2.93734	0.00014387	0.0204007	Yes	Chemotactic effects ( Nutrophil, Immature DC )( NK cell )	Complement and coagulation cascade
Toll_like_receptor_signaling_pathway	CCL3L3	2.96693	0.000243105	0.0287269	Yes	Chemotactic effects ( Nutrophil, Immature DC )( NK cell )	Complement and coagulation cascade
ErbB_signaling_pathway	STAT5A	-3.01638	0.000308792	0.0312762	Yes	DNA; Survival
Toll_like_receptor_signaling_pathway	IL6	3.19689	0.000363175	0.0321864	Yes	Inflammatory cytokines;Proinflammatory effects
Toll_like_receptor_signaling_pathway	IL12A	2.89446	0.000433965	0.0341868	Yes	Inflammatory cytokines;Proinflammatory effects
Chemokine_signaling_pathway	WAS	1.71974	0.000679374	0.0481676	Yes		Regulation of actin cytoskeleton

## Sheet: PSF cluster 1 border2 vs core
Pathway name	sink name	log2 fc	p val	p val adj	Is deregulated (PSF logFC > |1| AND adjusted p < 0.05)	Sink associated process	Dowstream pathway
Wnt_signaling_pathway	NFATC1	1.48495	6.2962e-06	0.00331736	Yes	DNA
Wnt_signaling_pathway	PRKCA	1.22113	9.35785e-06	0.00331736	Yes	DNA
cAMP_signaling_pathway	C00080	1.21482	0.000491042	0.0435186	Yes
cAMP_signaling_pathway	C01330	1.21482	0.000491042	0.0435186	Yes
cAMP_signaling_pathway	C00076	0.504676	0.000447882	0.0435186	No
cAMP_signaling_pathway	C01330	0.504676	0.000447882	0.0435186	No
MAPK_signaling_pathway	MYC	1.20691	0.00043514	0.0435186	Yes		possibly MYC supresses SRF
Wnt_signaling_pathway	CAMK2A	1.30445	0.000267773	0.0435186	Yes	DNA

## Sheet: PSF cluster 0 border vs core
Pathway name	sink name	log2 fc	p val	p val adj	Is deregulated (PSF logFC > |1| AND adjusted p < 0.05)	Sink associated process	Dowstream pathway
cAMP_signaling_pathway	HHIP	1.67935	1.37606e-07	9.75626e-05	Yes	Downregulation of Hedgehog signaling (embryonic fibroblast)	Hedgehog signaling pathway
cAMP_signaling_pathway	GLI1	1.5498	3.63415e-06	0.00128831	Yes	Downregulation of Hedgehog signaling (embryonic fibroblast)	Hedgehog signaling pathway
Apoptosis	TP53	2.87693	1.40177e-05	0.00331285	Yes	Pro-apoptotic genes
Apoptosis	FAS	2.6911	0.000111985	0.00992463	Yes	Pro-apoptotic genes
cAMP_signaling_pathway	C01330	-1.06263	7.25969e-05	0.00992463	Yes
cAMP_signaling_pathway	C00238	-1.06263	7.25969e-05	0.00992463	Yes
cAMP_signaling_pathway	PTCH1	1.46753	0.0001069	0.00992463	Yes	Downregulation of Hedgehog signaling (embryonic fibroblast)	Hedgehog signaling pathway
p53_signaling_pathway	DDB2	1.2961	8.94583e-05	0.00992463	Yes	DNA repair and damage prevention
FoxO_signaling_pathway	CCND1	0.602377	0.000136781	0.0107753	No	Cell cycle regulation	Cell cycle
Endocrine_resistance	NOTCH1	1.1275	0.000232591	0.0164907	Yes	Migration Invasion	Notch signaling pathway
Apoptosis	HRK	1.90829	0.000450019	0.0280922	Yes	Pro-apoptotic genes
EGFR_tyrosine_kinase_inhibitor_resistance	STAT3	1.7928	0.000589416	0.0280922	Yes	Abnormal dimerization of STAT 3; DNA; Differentiation; Growth; Proliferation; Survival; Motility; Angiogenesis
ErbB_signaling_pathway	ELK1	1.721	0.000594333	0.0280922	Yes	DNA; Angiogenesis
Hedgehog_signaling_pathway	CCND1	1.08071	0.000565069	0.0280922	Yes	Activiation of Hh target genes; Cell prolifeation tissue patterning stem cell maintenance,
p53_signaling_pathway	THBS1	2.00775	0.000562818	0.0280922	Yes	Inflammhibition of angiogenesis and metastasis
cAMP_signaling_pathway	C00076	-0.527024	0.000805908	0.0285838	No
cAMP_signaling_pathway	C01330	-0.527024	0.000805908	0.0285838	No
Chemokine_signaling_pathway	PRKACA	-0.588148	0.000886946	0.0285838	No
Hedgehog_signaling_pathway	GLI1	0.901672	0.000847089	0.0285838	No	Respression of Hh target genes; Cell prolifeation tissue patterning stem cell maintenance, development, ect
MAPK_signaling_pathway	HSPB1	1.23616	0.000853399	0.0285838	Yes	DNA; Proliferation differentiation, inflammation	Apoptosis; Cell cycle
Ras_signaling_pathway	RALGDS	0.97685	0.000753672	0.0285838	No	Effectors
Ras_signaling_pathway	RIN1	0.688549	0.000749094	0.0285838	No	Effectors
cAMP_signaling_pathway	TNNI3	-0.49409	0.00101116	0.0294888	No	Lusitropy (cardiac myocyte)
cAMP_signaling_pathway	PDE10A	-0.472155	0.00108139	0.0294888	No
JAK_STAT_signaling_pathway	MCL1	1.05244	0.0010445	0.0294888	Yes	Anti-apoptosis	Apoptosis
NOD_like_receptor_signaling_pathway	MFN1	1.59347	0.00102636	0.0294888	Yes
Apoptosis	FAS	1.24855	0.00129323	0.0327463	Yes	Pro-apoptotic genes
Hedgehog_signaling_pathway	BCL2	0.784504	0.00125514	0.0327463	No	Activiation of Hh target genes; Cell prolifeation tissue patterning stem cell maintenance,
Hedgehog_signaling_pathway	HHIP	0.685143	0.00138021	0.0337437	No	Respression of Hh target genes; Cell prolifeation tissue patterning stem cell maintenance, development, ect
Apoptosis	FASLG	1.88075	0.00161728	0.0375532	Yes	Pro-apoptotic genes
Endocrine_resistance	E2F1	-1.35215	0.00169492	0.0375532	Yes	Cell cycle progression	Cell cycle
Hippo_signaling_pathway	SNAI2	1.21708	0.00166216	0.0375532	Yes	Anti-apoptotic genes; Pro-proliferation genes
Endocrine_resistance	JUN	1.65741	0.00179548	0.0385574	Yes	DNA; Transcription Proliferation
PI3K_Akt_signaling_pathway	MCL1	0.990937	0.00184901	0.0385574	No	Cell survival	Apoptosis; NFkB signaling pathway; p53 signaling pathway
Chemokine_signaling_pathway	NFKB1	1.09708	0.0020679	0.0412464	Yes	DNA; Cytokine production; Cellular gowth and differentiation; Cell survival; Migration; Apoptosis
ErbB_signaling_pathway	ELK1	1.68173	0.00209432	0.0412464	Yes	DNA; Migration/ Invasion
Ras_signaling_pathway	TIAM1	1.07251	0.00218551	0.0418791	Yes	Effectors
JAK_STAT_signaling_pathway	CCND1	0.952661	0.00230997	0.0430991	No	Cell-cycle progression	Cell cycle
Endocrine_resistance	FOS	1.70892	0.00262288	0.0471029	Yes	DNA; Transcription Proliferation
JAK_STAT_signaling_pathway	BCL2	0.889883	0.00265742	0.0471029	No	Anti-apoptosis	Apoptosis
